# Supplementary material for: Neural circuit-wide analysis of gene expression during deafening-induced destabilization of birdsong
Source: bioRxiv preprint, doi:10.1101/2022.12.13.520194, version 1 (2022-12-14)
Supplement: Supplemental Table 4 [file 520194_file05.xlsx]

## Sheet: HVC
id	module.membership	KD.membership	node.degree	node.strength	node.weightedCF	S1(min.alpha=0.25)	S1(max.alpha=1.55)	S2(min.alpha=1.64)	S2(max.alpha=Inf)	c1_2	c1_3	c1_4	c1_5	c1_6	c1_7	c1_8	c1_9	c1_10	c1_11	c1_12	c1_13	c1_14	c1_15	c1_16	c1_17	c1_18	c1_19	c1_20	c1_21	c1_22	c1_23	c1_24	c1_25	c1_26	c1_27	c1_28	c1_29	c1_30	c1_31	c1_32	c1_33	c1_34	c1_35	c1_36	c1_37	c1_38	c1_39	c1_40	c1_41
LOC110467864	c1_2	c1_4	c1_14		11	8.27522	0.322125	c1_14	c1_4	c1_4	c1_1	YES		YES										YES
ELMOD2	c1_2	c1_5	c1_19	c1_39	c1_1	c1_2	c1_5	c1_19	c1_39	24	19.9454	0.161703	c1_39	c1_39	c1_39	c1_1	YES			YES														YES
NPTN	c1_2	c1_5	c1_19	c1_39		6	4.55411	0.63133	c1_39	c1_39	c1_39	c1_1	YES			YES														YES
LOC110474598	c1_2	c1_5	c1_20	c1_41		6	4.85697	0.60614	c1_41	c1_20	c1_20	c1_1	YES			YES															YES
SLC6A6	c1_2	c1_5	c1_19	c1_39		8	6.23299	0.476402	c1_39	c1_39	c1_39	c1_1	YES			YES														YES
LOC110474951	c1_3	c1_9		2	1.79545	1	c1_9	c1_9	c1_9	c1_1		YES						YES
NFE2L1	c1_2	c1_5	c1_19	c1_39	c1_1	c1_2	c1_5	28	21.8967	0.142257	c1_39	c1_39	c1_39	c1_1	YES			YES														YES
RPL38	c1_3	c1_9	c1_1	c1_3	c1_9	29	23.991	0.140694	c1_9	c1_9	c1_9	c1_1		YES						YES
NDUFB4	c1_3	c1_9		11	9.44867	0.354719	c1_9	c1_9	c1_9	c1_1		YES						YES
GLS	c1_3	c1_11	c1_28	c1_44	c1_64		4	2.78495	0.822708	c1_64	c1_44	c1_11	c1_1		YES								YES																	YES
RPL39	c1_3	c1_9	c1_1	c1_3	c1_9	16	12.7583	0.254102	c1_9	c1_9	c1_9	c1_1		YES						YES
UBA52	c1_3	c1_9	c1_1	c1_3	c1_9	21	16.0838	0.192902	c1_9	c1_9	c1_9	c1_1		YES						YES
TMBIM6	c1_2	c1_5	c1_19	c1_39		6	5.1096	0.605402	c1_39	c1_39	c1_39	c1_1	YES			YES														YES
DIP2B	c1_2	c1_5	c1_19	c1_39	c1_1	c1_2	c1_5	c1_19	c1_39	23	17.609	0.16847	c1_39	c1_39	c1_39	c1_1	YES			YES														YES
IDI1	c1_3	c1_11	c1_28	c1_44	c1_65	c1_72	c1_74	c1_1	c1_3	c1_11	c1_28	23	17.4183	0.172734	c1_74	c1_44	c1_11	c1_1		YES								YES																	YES
LOC116184040	c1_3	c1_9		5	3.81671	0.712919	c1_9	c1_9	c1_9	c1_1		YES						YES
PCSK1	c1_3	c1_11	c1_28	c1_44	c1_65	c1_73	c1_1	c1_3	c1_11	c1_28	c1_44	c1_65	22	17.5313	0.183388	c1_73	c1_44	c1_11	c1_1		YES								YES																	YES
LOC110481310	c1_3	c1_9		8	6.54915	0.477793	c1_9	c1_9	c1_9	c1_1		YES						YES
MAP7D2	c1_2	c1_5	c1_19	c1_39		8	6.60734	0.473377	c1_39	c1_39	c1_39	c1_1	YES			YES														YES
NR0B1	c1_3	c1_11	c1_28	c1_44	c1_64	c1_1	c1_3	c1_11	c1_28	18	14.8445	0.220754	c1_64	c1_44	c1_11	c1_1		YES								YES																	YES
SERBP1	c1_3	c1_11	c1_28	c1_44	c1_64	c1_1	c1_3	c1_11	22	16.4251	0.182713	c1_64	c1_44	c1_11	c1_1		YES								YES																	YES
LOC110478266	c1_3	c1_9		13	10.7966	0.302128	c1_9	c1_9	c1_9	c1_1		YES						YES
LOC110479391	c1_3	c1_11	c1_28	c1_44	c1_64	c1_1	c1_3	c1_11	c1_28	c1_44	c1_64	67	52.6243	0.0593175	c1_64	c1_44	c1_11	c1_1		YES								YES																	YES
RPS15A	c1_3	c1_9		7	5.73741	0.531508	c1_9	c1_9	c1_9	c1_1		YES						YES
CIRBP	c1_2	c1_5	c1_19	c1_39		13	9.42268	0.287212	c1_39	c1_39	c1_39	c1_1	YES			YES														YES
LOC110477150	c1_3	c1_9		3	2.65382	1	c1_9	c1_9	c1_9	c1_1		YES						YES
CRHBP	c1_3	c1_11	c1_28	c1_44	c1_65	c1_72	c1_74	c1_1	c1_3	c1_11	c1_28	c1_44	c1_65	c1_72	c1_74	48	37.5997	0.0858332	c1_74	c1_44	c1_11	c1_1		YES								YES																	YES
MPRIP	c1_2	c1_5	c1_19	c1_39		12	10.2859	0.306166	c1_39	c1_39	c1_39	c1_1	YES			YES														YES
NRGN	c1_3	c1_9		13	10.3421	0.296726	c1_9	c1_9	c1_9	c1_1		YES						YES
SHOC2	c1_2	c1_5	c1_19	c1_39		9	7.06649	0.427865	c1_39	c1_39	c1_39	c1_1	YES			YES														YES
PHLDA2	c1_3	c1_11	c1_28	c1_44	c1_64	c1_1	c1_3	c1_11	c1_28	c1_44	c1_64	50	38.0971	0.0814429	c1_64	c1_44	c1_11	c1_1		YES								YES																	YES
NOP10	c1_3	c1_9		10	7.63895	0.392634	c1_9	c1_9	c1_9	c1_1		YES						YES
HNRNPR	c1_2	c1_5	c1_19	c1_39		4	3.52765	0.833131	c1_39	c1_39	c1_39	c1_1	YES			YES														YES
THY1	c1_3	c1_11	c1_29	c1_59	c1_1	c1_3	17	12.8461	0.21063	c1_59	c1_29	c1_11	c1_1		YES								YES																		YES
FAM20A	c1_2	c1_5	c1_19	c1_39	c1_1	c1_2	c1_5	c1_19	c1_39	25	20.0083	0.154501	c1_39	c1_39	c1_39	c1_1	YES			YES														YES
RPS27	c1_3	c1_9		8	6.44518	0.479311	c1_9	c1_9	c1_9	c1_1		YES						YES
NTS	c1_3	c1_11	c1_28	c1_44	c1_64	c1_1	c1_3	c1_11	18	13.8131	0.2223	c1_64	c1_44	c1_11	c1_1		YES								YES																	YES
RPS29	c1_3	c1_9	c1_1	c1_3	c1_9	24	18.667	0.169829	c1_9	c1_9	c1_9	c1_1		YES						YES
TBC1D9	c1_2	c1_5	c1_19	c1_39	c1_1	c1_2	c1_5	c1_19	c1_39	28	22.9528	0.143009	c1_39	c1_39	c1_39	c1_1	YES			YES														YES
ACP1	c1_3	c1_11	c1_28	c1_44	c1_64		14	11.2203	0.282042	c1_64	c1_44	c1_11	c1_1		YES								YES																	YES
AP3D1	c1_3	c1_11	c1_28	c1_45		8	6.12309	0.451339	c1_45	c1_45	c1_11	c1_1		YES								YES																	YES
AMN1	c1_3	c1_11	c1_28	c1_44	c1_65	c1_72	c1_74		10	7.36125	0.365627	c1_74	c1_44	c1_11	c1_1		YES								YES																	YES
HMGB1	c1_3	c1_11	c1_28	c1_44	c1_64		7	5.27762	0.537103	c1_64	c1_44	c1_11	c1_1		YES								YES																	YES
LRWD1	c1_3	c1_11	c1_28	c1_44	c1_65	c1_72	c1_74		9	7.07315	0.427692	c1_74	c1_44	c1_11	c1_1		YES								YES																	YES
ATP5F1D	c1_3	c1_9		3	2.63439	1	c1_9	c1_9	c1_9	c1_1		YES						YES
SPTBN1	c1_2	c1_5	c1_20	c1_42	c1_1	c1_2	c1_5	c1_20	c1_42	21	16.4034	0.18685	c1_42	c1_20	c1_20	c1_1	YES			YES															YES
LOC110484385	c1_3	c1_9		12	9.02506	0.318656	c1_9	c1_9	c1_9	c1_1		YES						YES
ATP2B2	c1_2	c1_5	c1_20	c1_42		14	10.9816	0.283591	c1_42	c1_20	c1_20	c1_1	YES			YES															YES
AMER1	c1_3	c1_13	c1_37		3	2.43079	1	c1_37	c1_13	c1_13	c1_1		YES										YES																								YES
DBI	c1_3	c1_11	c1_29	c1_59		12	9.11789	0.329058	c1_59	c1_29	c1_11	c1_1		YES								YES																		YES
PTMA	c1_2	c1_5	c1_19	c1_39		5	4.43426	0.699827	c1_39	c1_39	c1_39	c1_1	YES			YES														YES
SRSF4	c1_3	c1_11	c1_28	c1_44	c1_64	c1_1	c1_3	c1_11	c1_28	c1_44	c1_64	23	17.8136	0.17313	c1_64	c1_44	c1_11	c1_1		YES								YES																	YES
HIC2	c1_2	c1_4	c1_15		6	4.18832	0.595516	c1_15	c1_4	c1_4	c1_1	YES		YES											YES
DNM1	c1_2	c1_5	c1_22	c1_1	c1_2	c1_5	21	16.2613	0.174786	c1_22	c1_22	c1_22	c1_1	YES			YES																	YES
FLRT2	c1_3	c1_11	c1_28	c1_44	c1_65	c1_72	c1_74		11	8.47037	0.358835	c1_74	c1_44	c1_11	c1_1		YES								YES																	YES
ATP2B4	c1_2	c1_5	c1_25		14	10.1655	0.248984	c1_25	c1_25	c1_25	c1_1	YES			YES																				YES
CBX1	c1_2	c1_5	c1_19	c1_39	c1_1	c1_2	c1_5	24	18.7843	0.167486	c1_39	c1_39	c1_39	c1_1	YES			YES														YES
SEC24C	c1_2	c1_5	c1_19	c1_39		8	6.10394	0.479281	c1_39	c1_39	c1_39	c1_1	YES			YES														YES
LOC110483781	c1_3	c1_11	c1_28	c1_44	c1_64	c1_1	c1_3	c1_11	c1_28	c1_44	c1_64	23	17.4395	0.176906	c1_64	c1_44	c1_11	c1_1		YES								YES																	YES
HOMER1	c1_3	c1_11	c1_28	c1_44	c1_65	c1_73	c1_1	c1_3	c1_11	c1_28	c1_44	c1_65	c1_73	36	28.1442	0.113335	c1_73	c1_44	c1_11	c1_1		YES								YES																	YES
CNMD	c1_3	c1_11	c1_29	c1_59	c1_1	c1_3	c1_11	c1_29	c1_59	27	21.4694	0.146093	c1_59	c1_29	c1_11	c1_1		YES								YES																		YES
EIF2B1	c1_3	c1_11	c1_28		9	7.16167	0.425776	NA	NA	c1_11	c1_1		YES								YES																	YES
XBP1	c1_3	c1_11	c1_28	c1_46	c1_66		11	8.60222	0.355967	c1_66	c1_46	c1_11	c1_1		YES								YES																	YES
MRPL37	c1_2	c1_5	c1_19	c1_39		9	6.54365	0.432118	c1_39	c1_39	c1_39	c1_1	YES			YES														YES
ATP11B	c1_2	c1_5	c1_19	c1_40	c1_62	c1_70		4	3.00836	0.833176	c1_70	c1_40	c1_40	c1_1	YES			YES														YES
DDRGK1	c1_3	c1_11	c1_28	c1_44	c1_64		13	9.67956	0.288313	c1_64	c1_44	c1_11	c1_1		YES								YES																	YES
SYT4	c1_3	c1_11	c1_28	c1_44	c1_65	c1_72	c1_75	c1_1	c1_3	c1_11	c1_28	c1_44	c1_65	c1_72	c1_75	26	19.525	0.159008	c1_75	c1_44	c1_11	c1_1		YES								YES																	YES
PLXNB1	c1_2	c1_5	c1_19	c1_39		5	4.09977	0.708341	c1_39	c1_39	c1_39	c1_1	YES			YES														YES
ATP6V0C	c1_3	c1_11	c1_28	c1_44	c1_65	c1_73	c1_1	c1_3	c1_11	c1_28	19	15.0743	0.212507	c1_73	c1_44	c1_11	c1_1		YES								YES																	YES
TRPC4	c1_3	c1_11	c1_28	c1_44	c1_64	c1_1	c1_3	c1_11	c1_28	c1_44	c1_64	20	14.9881	0.201512	c1_64	c1_44	c1_11	c1_1		YES								YES																	YES
TPM4	c1_3	c1_11	c1_28		10	7.77187	0.386608	NA	NA	c1_11	c1_1		YES								YES																	YES
SOX5	c1_3	c1_11		7	5.25167	0.540167	NA	NA	c1_11	c1_1		YES								YES
LOC110478878	c1_2	c1_5	c1_22		10	7.25243	0.392172	c1_22	c1_22	c1_22	c1_1	YES			YES																	YES
PDCD5	c1_3	c1_11	c1_29	c1_59		4	3.18483	0.834995	c1_59	c1_29	c1_11	c1_1		YES								YES																		YES
DYNC1I2	c1_3	c1_11	c1_28	c1_1	c1_3	c1_11	c1_28	19	14.7492	0.210318	NA	NA	c1_11	c1_1		YES								YES																	YES
TMEM201	c1_3	c1_11	c1_28	c1_44	c1_65	c1_73		5	3.87699	0.714482	c1_73	c1_44	c1_11	c1_1		YES								YES																	YES
RGS7BP	c1_3	c1_11	c1_28		5	3.63877	0.633626	NA	NA	c1_11	c1_1		YES								YES																	YES
RPL13A	c1_3	c1_9	c1_1	c1_3	c1_9	22	16.7301	0.173939	c1_9	c1_9	c1_9	c1_1		YES						YES
MPHOSPH8	c1_3	c1_11	c1_28	c1_52		10	7.68342	0.390906	c1_52	c1_52	c1_11	c1_1		YES								YES																	YES
ZC3H15	c1_3	c1_11	c1_30		10	7.69986	0.388059	c1_30	c1_30	c1_11	c1_1		YES								YES																			YES
DOCK11	c1_2	c1_5	c1_22		5	4.08748	0.705268	c1_22	c1_22	c1_22	c1_1	YES			YES																	YES
GPC3	c1_3	c1_11	c1_28	c1_44	c1_65	c1_72	c1_75		9	6.95631	0.424566	c1_75	c1_44	c1_11	c1_1		YES								YES																	YES
SMS	c1_3	c1_13	c1_37	c1_1	c1_3	c1_13	c1_37	36	25.097	0.106957	c1_37	c1_13	c1_13	c1_1		YES										YES
RALGDS	c1_2	c1_4	c1_15		4	2.90367	0.684967	c1_15	c1_4	c1_4	c1_1	YES		YES											YES
LOC110469168	c1_2	c1_4	c1_14		14	10.2162	0.259861	c1_14	c1_4	c1_4	c1_1	YES		YES										YES
SAMD4A	c1_2	c1_5	c1_20	c1_42		6	4.78145	0.609091	c1_42	c1_20	c1_20	c1_1	YES			YES															YES
PGM2L1	c1_2	c1_5	c1_19	c1_39		14	10.7421	0.28394	c1_39	c1_39	c1_39	c1_1	YES			YES														YES
OLFM1	c1_3	c1_11	c1_28	c1_45		14	10.4898	0.284425	c1_45	c1_45	c1_11	c1_1		YES								YES																	YES
PXK	c1_2	c1_5	c1_19	c1_39		11	8.57637	0.349597	c1_39	c1_39	c1_39	c1_1	YES			YES														YES
RANGAP1	c1_3	c1_11	c1_28	c1_44	c1_65	c1_72	c1_74	c1_1	c1_3	c1_11	c1_28	c1_44	c1_65	c1_72	24	17.9652	0.164723	c1_74	c1_44	c1_11	c1_1		YES								YES																	YES
LPGAT1	c1_2	c1_5	c1_20	c1_42	c1_1	c1_2	c1_5	c1_20	21	15.9665	0.187161	c1_42	c1_20	c1_20	c1_1	YES			YES															YES
SPIRE2	c1_2	c1_4	c1_14	c1_1	c1_2	19	14.4875	0.166528	c1_14	c1_4	c1_4	c1_1	YES		YES										YES
SGTA	c1_2	c1_5	c1_19	c1_39		3	2.43278	1	c1_39	c1_39	c1_39	c1_1	YES			YES														YES
MAPK10	c1_2	c1_5	c1_20	c1_42		6	4.76265	0.550613	c1_42	c1_20	c1_20	c1_1	YES			YES															YES
FOXP1	c1_2	c1_5	c1_19	c1_39		5	4.00081	0.712335	c1_39	c1_39	c1_39	c1_1	YES			YES														YES
LOC110483411	c1_3	c1_11	c1_28		11	8.39448	0.359168	NA	NA	c1_11	c1_1		YES								YES																	YES
SST	c1_3	c1_11	c1_28	c1_46	c1_66		11	7.87898	0.353801	c1_66	c1_46	c1_11	c1_1		YES								YES																	YES
AMIGO3	c1_2	c1_4	c1_15	c1_1	c1_2	c1_4	18	13.5546	0.194554	c1_15	c1_4	c1_4	c1_1	YES		YES											YES
NEFM	c1_3	c1_11	c1_28	c1_44	c1_65	c1_73		9	6.94605	0.425337	c1_73	c1_44	c1_11	c1_1		YES								YES																	YES
PTPRS	c1_2	c1_5	c1_20	c1_41		10	7.89744	0.342657	c1_41	c1_20	c1_20	c1_1	YES			YES															YES
SRGAP2	c1_2	c1_5	c1_19	c1_39		4	3.18045	0.844377	c1_39	c1_39	c1_39	c1_1	YES			YES														YES
DLG1	c1_3	c1_12		7	4.99652	0.531587	c1_12	c1_12	c1_12	c1_1		YES									YES
YWHAB	c1_3	c1_11	c1_29	c1_59	c1_1	c1_3	c1_11	c1_29	c1_59	37	28.1147	0.105447	c1_59	c1_29	c1_11	c1_1		YES								YES																		YES
BCR	c1_2	c1_5	c1_25		12	8.71004	0.325347	c1_25	c1_25	c1_25	c1_1	YES			YES																				YES
RPL32	c1_3	c1_9		12	8.75282	0.331398	c1_9	c1_9	c1_9	c1_1		YES						YES
MGLL	c1_3	c1_11	c1_28	c1_53	c1_53	9	6.67164	0.397377	c1_53	c1_53	c1_11	c1_1		YES								YES																	YES
GNA11	c1_2	c1_5	c1_20	c1_42		6	4.88538	0.609002	c1_42	c1_20	c1_20	c1_1	YES			YES															YES
SMAP2	c1_2	c1_5	c1_19	c1_39		9	6.88939	0.427508	c1_39	c1_39	c1_39	c1_1	YES			YES														YES
C7H2orf88	c1_3	c1_11	c1_29	c1_59		5	3.76917	0.700071	c1_59	c1_29	c1_11	c1_1		YES								YES																		YES
GRIN1	c1_2	c1_5	c1_20	c1_42		12	9.06923	0.312134	c1_42	c1_20	c1_20	c1_1	YES			YES															YES
FAM204A	c1_3	c1_11	c1_28	c1_44	c1_64	c1_1	c1_3	c1_11	c1_28	c1_44	19	15.3356	0.209464	c1_64	c1_44	c1_11	c1_1		YES								YES																	YES
POLQ	c1_3	c1_13	c1_37		13	9.43923	0.291612	c1_37	c1_13	c1_13	c1_1		YES										YES																								YES
RGS7	c1_3	c1_11	c1_29	c1_59		4	2.99521	0.845899	c1_59	c1_29	c1_11	c1_1		YES								YES																		YES
LOC116184739	c1_3	c1_11	c1_28	c1_57		4	3.0857	0.83102	c1_57	c1_57	c1_11	c1_1		YES								YES																	YES
SMIM11A	c1_3	c1_9		4	3.28115	0.838558	c1_9	c1_9	c1_9	c1_1		YES						YES
CLDN11	c1_2	c1_5	c1_19	c1_39		4	2.99672	0.842122	c1_39	c1_39	c1_39	c1_1	YES			YES														YES
MTA1	c1_2	c1_4	c1_14	c1_1	c1_2	c1_4	c1_14	33	24.5505	0.0981316	c1_14	c1_4	c1_4	c1_1	YES		YES										YES
ANAPC11	c1_3	c1_9		8	5.71397	0.477767	c1_9	c1_9	c1_9	c1_1		YES						YES
LOC110483487	c1_3	c1_9		10	7.4525	0.394486	c1_9	c1_9	c1_9	c1_1		YES						YES
JMJD1C	c1_3	c1_11	c1_28	c1_44	c1_64		10	7.88977	0.385228	c1_64	c1_44	c1_11	c1_1		YES								YES																	YES
TSPAN7	c1_3	c1_11	c1_28	c1_44	c1_65	c1_73		12	9.31473	0.315102	c1_73	c1_44	c1_11	c1_1		YES								YES																	YES
ZBTB46	c1_2	c1_5	c1_25	c1_1	c1_2	c1_5	23	17.6845	0.153075	c1_25	c1_25	c1_25	c1_1	YES			YES																				YES
NSG1	c1_2	c1_5	c1_19	c1_39	c1_1	c1_2	c1_5	17	13.0353	0.236837	c1_39	c1_39	c1_39	c1_1	YES			YES														YES
CELA3B	c1_2	c1_4	c1_15		12	8.499	0.329975	c1_15	c1_4	c1_4	c1_1	YES		YES											YES
RAP2A	c1_2	c1_5	c1_20	c1_42		6	4.8066	0.610096	c1_42	c1_20	c1_20	c1_1	YES			YES															YES
GADD45B	c1_3	c1_11	c1_28	c1_44	c1_64		6	4.87538	0.604225	c1_64	c1_44	c1_11	c1_1		YES								YES																	YES
DUSP5	c1_3	c1_11	c1_28	c1_44	c1_65	c1_72	c1_75	c1_1	c1_3	c1_11	c1_28	19	14.0481	0.210435	c1_75	c1_44	c1_11	c1_1		YES								YES																	YES
PCSK2	c1_2	c1_5	c1_22		9	6.66834	0.432806	c1_22	c1_22	c1_22	c1_1	YES			YES																	YES
DLG2	c1_3	c1_11	c1_28	c1_44	c1_64	c1_1	c1_3	c1_11	c1_28	c1_44	19	14.2883	0.212131	c1_64	c1_44	c1_11	c1_1		YES								YES																	YES
SEC16A	c1_2	c1_5	c1_19	c1_39		7	5.7369	0.529617	c1_39	c1_39	c1_39	c1_1	YES			YES														YES
UPF2	c1_2	c1_4	c1_15	c1_1	c1_2	c1_4	c1_15	52	36.9489	0.0762213	c1_15	c1_4	c1_4	c1_1	YES		YES											YES
ZFAND5	c1_3	c1_11	c1_28	c1_44	c1_65	c1_72	c1_74	c1_1	c1_3	c1_11	c1_28	c1_44	c1_65	20	15.4246	0.180381	c1_74	c1_44	c1_11	c1_1		YES								YES																	YES
LOC110480474	c1_3	c1_13	c1_38		11	8.12457	0.358394	c1_38	c1_13	c1_13	c1_1		YES										YES																									YES
DRD3	c1_2	c1_4	c1_15	c1_1	c1_2	c1_4	c1_15	30	21.1125	0.134864	c1_15	c1_4	c1_4	c1_1	YES		YES											YES
GNAS	c1_2	c1_4	c1_14		14	10.2834	0.271532	c1_14	c1_4	c1_4	c1_1	YES		YES										YES
ELOVL5	c1_3	c1_11	c1_28	c1_44	c1_65	c1_72	c1_74	c1_1	c1_3	c1_11	c1_28	18	13.4802	0.215936	c1_74	c1_44	c1_11	c1_1		YES								YES																	YES
SPATA7	c1_3	c1_11	c1_29	c1_59		11	7.79637	0.360803	c1_59	c1_29	c1_11	c1_1		YES								YES																		YES
IER5L	c1_2	c1_5	c1_20	c1_41		8	5.74657	0.37777	c1_41	c1_20	c1_20	c1_1	YES			YES															YES
ADGRB1	c1_2	c1_5	c1_19	c1_39		10	7.83572	0.387638	c1_39	c1_39	c1_39	c1_1	YES			YES														YES
TRIM9	c1_3	c1_11	c1_29	c1_59	c1_1	c1_3	16	11.7032	0.2228	c1_59	c1_29	c1_11	c1_1		YES								YES																		YES
LGMN	c1_3	c1_10		9	7.07852	0.420538	c1_10	c1_10	c1_10	c1_1		YES							YES
SLC4A3	c1_3	c1_11	c1_28		13	9.41137	0.305446	NA	NA	c1_11	c1_1		YES								YES																	YES
LOC110468175	c1_2	c1_5	c1_25		3	2.3608	1	c1_25	c1_25	c1_25	c1_1	YES			YES																				YES
TRAFD1	c1_3	c1_11	c1_28		10	6.92471	0.358697	NA	NA	c1_11	c1_1		YES								YES																	YES
PSIP1	c1_3	c1_11	c1_28		4	3.01423	0.837256	NA	NA	c1_11	c1_1		YES								YES																	YES
LOC110479911	c1_3	c1_9		5	3.73643	0.628165	c1_9	c1_9	c1_9	c1_1		YES						YES
PITPNC1	c1_3	c1_11	c1_28	c1_44	c1_64		10	7.1993	0.391452	c1_64	c1_44	c1_11	c1_1		YES								YES																	YES
SIK1	c1_3	c1_11	c1_28	c1_44	c1_65	c1_72	c1_74	c1_1	c1_3	c1_11	15	11.5174	0.259217	c1_74	c1_44	c1_11	c1_1		YES								YES																	YES
CAMK1D	c1_3	c1_13	c1_38		13	10.0699	0.30024	c1_38	c1_13	c1_13	c1_1		YES										YES																									YES
QSOX1	c1_2	c1_5	c1_22		7	5.45471	0.433226	c1_22	c1_22	c1_22	c1_1	YES			YES																	YES
ANKRD10	c1_3	c1_11	c1_28	c1_44	c1_64		3	2.31561	1	c1_64	c1_44	c1_11	c1_1		YES								YES																	YES
ARFIP1	c1_3	c1_11	c1_29	c1_60	c1_68	c1_1	c1_3	c1_11	c1_29	c1_60	c1_68	18	13.6866	0.214878	c1_68	c1_29	c1_11	c1_1		YES								YES																		YES
RPL36A	c1_3	c1_9		10	7.66922	0.386862	c1_9	c1_9	c1_9	c1_1		YES						YES
LOC110482477	c1_3	c1_11	c1_28	c1_44	c1_64		8	6.33352	0.472513	c1_64	c1_44	c1_11	c1_1		YES								YES																	YES
NSRP1	c1_3	c1_11	c1_28	c1_44	c1_64		9	6.52775	0.404212	c1_64	c1_44	c1_11	c1_1		YES								YES																	YES
EEA1	c1_3	c1_11	c1_28	c1_44	c1_65	c1_72	c1_74	c1_1	c1_3	c1_11	c1_28	18	13.3061	0.209914	c1_74	c1_44	c1_11	c1_1		YES								YES																	YES
MAFB	c1_2	c1_5	c1_19	c1_39		4	2.96634	0.849876	c1_39	c1_39	c1_39	c1_1	YES			YES														YES
PACS2	c1_2	c1_5	c1_25	c1_1	c1_2	c1_5	c1_25	32	23.7396	0.120388	c1_25	c1_25	c1_25	c1_1	YES			YES																				YES
PTGFR	c1_3	c1_11	c1_28		4	3.02942	0.830318	NA	NA	c1_11	c1_1		YES								YES																	YES
ASB7	c1_3	c1_11	c1_28	c1_44	c1_65	c1_72	c1_74		5	3.72879	0.706753	c1_74	c1_44	c1_11	c1_1		YES								YES																	YES
NR4A1	c1_3	c1_11	c1_28	c1_47		8	5.92053	0.471631	c1_47	c1_47	c1_11	c1_1		YES								YES																	YES
BSG	c1_2	c1_5	c1_19	c1_39		4	3.2773	0.835854	c1_39	c1_39	c1_39	c1_1	YES			YES														YES
CREM	c1_3	c1_11	c1_28	c1_44	c1_65	c1_72	c1_74	c1_1	c1_3	c1_11	c1_28	c1_44	c1_65	c1_72	c1_74	56	44.0325	0.0703723	c1_74	c1_44	c1_11	c1_1		YES								YES																	YES
FILIP1L	c1_3	c1_11	c1_28	c1_44	c1_64		8	5.99535	0.477606	c1_64	c1_44	c1_11	c1_1		YES								YES																	YES
FAM3C	c1_3	c1_11	c1_28	c1_44	c1_65	c1_73		6	4.76197	0.602802	c1_73	c1_44	c1_11	c1_1		YES								YES																	YES
PRELP	c1_2	c1_5	c1_25		7	5.78439	0.47663	c1_25	c1_25	c1_25	c1_1	YES			YES																				YES
STK11	c1_3	c1_11	c1_28		6	4.8358	0.601627	NA	NA	c1_11	c1_1		YES								YES																	YES
MAT2B	c1_2	c1_5	c1_19	c1_39		6	4.46514	0.617313	c1_39	c1_39	c1_39	c1_1	YES			YES														YES
NIPA1	c1_2	c1_5	c1_22		5	3.98065	0.702853	c1_22	c1_22	c1_22	c1_1	YES			YES																	YES
TENM4	c1_3	c1_11	c1_28	c1_44	c1_64		6	4.44622	0.618931	c1_64	c1_44	c1_11	c1_1		YES								YES																	YES
MAP1B	c1_3	c1_11	c1_28		5	3.85374	0.710106	NA	NA	c1_11	c1_1		YES								YES																	YES
FKBP1B	c1_3	c1_11	c1_28	c1_44	c1_64		9	7.2379	0.422787	c1_64	c1_44	c1_11	c1_1		YES								YES																	YES
HMGA1	c1_2	c1_5	c1_19	c1_39		8	6.10181	0.475504	c1_39	c1_39	c1_39	c1_1	YES			YES														YES
TMBIM4	c1_2	c1_5	c1_20	c1_43		8	5.54532	0.461569	c1_43	c1_20	c1_20	c1_1	YES			YES															YES
SDC3	c1_3		7	5.73653	0.523389	NA	NA	NA	c1_1		YES
CUL4B	c1_3	c1_13	c1_38	c1_1	c1_3	c1_38	15	11.1896	0.263258	c1_38	c1_13	c1_13	c1_1		YES										YES
HSP90B1	c1_3	c1_11	c1_28	c1_44	c1_65	c1_72	c1_75		6	4.28373	0.619615	c1_75	c1_44	c1_11	c1_1		YES								YES																	YES
LOC110482638	c1_3	c1_11	c1_31		8	5.57383	0.48111	c1_31	c1_31	c1_11	c1_1		YES								YES																				YES
CADM2	c1_3	c1_11	c1_29	c1_61		11	8.18288	0.350942	c1_61	c1_29	c1_11	c1_1		YES								YES																		YES
ERBB4	c1_2	c1_5	c1_26		7	4.40055	0.487849	c1_26	c1_26	c1_26	c1_1	YES			YES																					YES
DAPK3	c1_3	c1_9		4	3.10305	0.687976	c1_9	c1_9	c1_9	c1_1		YES						YES
SRRM3	c1_3	c1_11	c1_28	c1_44	c1_64		12	9.37101	0.329522	c1_64	c1_44	c1_11	c1_1		YES								YES																	YES
LOC110483068	c1_3	c1_11	c1_28	c1_44	c1_64		4	3.19605	0.837174	c1_64	c1_44	c1_11	c1_1		YES								YES																	YES
C1AH12orf73	c1_3	c1_9		10	7.49306	0.37225	c1_9	c1_9	c1_9	c1_1		YES						YES
DNAJA4	c1_3	c1_11	c1_28	c1_46	c1_66		8	6.37501	0.474164	c1_66	c1_46	c1_11	c1_1		YES								YES																	YES
NEUROD1	c1_2	c1_5	c1_19	c1_39		7	5.51448	0.536345	c1_39	c1_39	c1_39	c1_1	YES			YES														YES
STAG2	c1_3	c1_11	c1_28	c1_44	c1_64		9	6.79927	0.427843	c1_64	c1_44	c1_11	c1_1		YES								YES																	YES
LOC110484315	c1_2	c1_4	c1_15		6	4.61909	0.606174	c1_15	c1_4	c1_4	c1_1	YES		YES											YES
ATP1A1	c1_2	c1_5	c1_25		8	5.3735	0.471855	c1_25	c1_25	c1_25	c1_1	YES			YES																				YES
LXN	c1_3	c1_11	c1_28	c1_44	c1_64		4	3.20855	0.840888	c1_64	c1_44	c1_11	c1_1		YES								YES																	YES
CNST	c1_3	c1_11		3	2.40008	1	NA	NA	c1_11	c1_1		YES								YES
FOSL2	c1_2	c1_5	c1_27		12	8.77959	0.331766	c1_27	c1_27	c1_27	c1_1	YES			YES																						YES
CTSL	c1_3	c1_11		6	4.71279	0.605565	NA	NA	c1_11	c1_1		YES								YES
SNTN	c1_2	c1_5	c1_25		4	3.09149	0.845058	c1_25	c1_25	c1_25	c1_1	YES			YES																				YES
SVOP	c1_2	c1_5	c1_20	c1_42		10	6.9873	0.381757	c1_42	c1_20	c1_20	c1_1	YES			YES															YES
CDC34	c1_3	c1_11	c1_29	c1_59		3	2.42665	1	c1_59	c1_29	c1_11	c1_1		YES								YES																		YES
NCOA3	c1_2	c1_5	c1_19	c1_39		6	4.46557	0.549306	c1_39	c1_39	c1_39	c1_1	YES			YES														YES
LOC110484008	c1_3	c1_11	c1_28	c1_44	c1_64		9	6.64546	0.431606	c1_64	c1_44	c1_11	c1_1		YES								YES																	YES
TET1	c1_3	c1_11	c1_28		8	5.54412	0.440292	NA	NA	c1_11	c1_1		YES								YES																	YES
SCMH1	c1_2	c1_4	c1_14		4	2.86796	0.832851	c1_14	c1_4	c1_4	c1_1	YES		YES										YES
METAP2	c1_3	c1_11	c1_28	c1_47		7	4.91985	0.535425	c1_47	c1_47	c1_11	c1_1		YES								YES																	YES
ESF1	c1_3	c1_11	c1_28	c1_44	c1_65	c1_72	c1_74		5	4.09529	0.699835	c1_74	c1_44	c1_11	c1_1		YES								YES																	YES
SDCCAG8	c1_3	c1_11	c1_29	c1_59		7	5.16193	0.498156	c1_59	c1_29	c1_11	c1_1		YES								YES																		YES
SLC16A6	c1_3	c1_13	c1_38		10	7.51203	0.386916	c1_38	c1_13	c1_13	c1_1		YES										YES																									YES
FBXL16	c1_3	c1_11	c1_28	c1_44	c1_64		6	4.43769	0.614196	c1_64	c1_44	c1_11	c1_1		YES								YES																	YES
CHMP1B	c1_3	c1_13	c1_37		13	9.57962	0.305143	c1_37	c1_13	c1_13	c1_1		YES										YES																								YES
OAZ1	c1_3	c1_9		9	6.89248	0.42676	c1_9	c1_9	c1_9	c1_1		YES						YES
LURAP1	c1_2	c1_5	c1_25		13	9.40457	0.289729	c1_25	c1_25	c1_25	c1_1	YES			YES																				YES
DAAM1	c1_2	c1_5	c1_20	c1_42		4	3.24225	0.838076	c1_42	c1_20	c1_20	c1_1	YES			YES															YES
TAGLN3	c1_3	c1_13	c1_37	c1_1	15	11.2211	0.253142	c1_37	c1_13	c1_13	c1_1		YES										YES																								YES
MTPN	c1_3	c1_11	c1_29	c1_59		7	5.45257	0.529972	c1_59	c1_29	c1_11	c1_1		YES								YES																		YES
CHGB	c1_3	c1_11	c1_28	c1_44	c1_65	c1_72	c1_75		13	10.2109	0.304597	c1_75	c1_44	c1_11	c1_1		YES								YES																	YES
SERGEF	c1_2	c1_5	c1_22	c1_1	c1_2	c1_5	c1_22	20	15.5257	0.198389	c1_22	c1_22	c1_22	c1_1	YES			YES																	YES
ELOB	c1_3	c1_9		3	2.39694	1	c1_9	c1_9	c1_9	c1_1		YES						YES
TET2	c1_3	c1_11	c1_28	c1_44	c1_65	c1_73		7	5.29096	0.534901	c1_73	c1_44	c1_11	c1_1		YES								YES																	YES
IRS2	c1_3	c1_11	c1_28	c1_44	c1_64		6	4.71646	0.606738	c1_64	c1_44	c1_11	c1_1		YES								YES																	YES
SLC25A25	c1_3	c1_11	c1_29	c1_61		6	4.56382	0.599158	c1_61	c1_29	c1_11	c1_1		YES								YES																		YES
LOC110468582	c1_3	c1_11	c1_28	c1_44	c1_64		9	6.64333	0.424132	c1_64	c1_44	c1_11	c1_1		YES								YES																	YES
CAB39L	c1_3	c1_11	c1_28	c1_44	c1_65	c1_72	c1_74	c1_1	c1_3	c1_11	c1_28	15	11.4215	0.230112	c1_74	c1_44	c1_11	c1_1		YES								YES																	YES
WDR7	c1_2	c1_5	c1_26		10	7.24096	0.339811	c1_26	c1_26	c1_26	c1_1	YES			YES																					YES
SLMAP	c1_3	c1_11	c1_29	c1_59		10	7.1866	0.373309	c1_59	c1_29	c1_11	c1_1		YES								YES																		YES
LOC110480705	c1_3	c1_11	c1_28	c1_44	c1_65	c1_72	c1_74		4	2.98688	0.842095	c1_74	c1_44	c1_11	c1_1		YES								YES																	YES
NLGN4X	c1_3	c1_11	c1_29	c1_60	c1_68		8	6.23312	0.470045	c1_68	c1_29	c1_11	c1_1		YES								YES																		YES
CAMSAP2	c1_2	c1_5	c1_20	c1_42		3	2.29896	1	c1_42	c1_20	c1_20	c1_1	YES			YES															YES
RAB13	c1_3	c1_11	c1_29	c1_59		4	3.11755	0.826964	c1_59	c1_29	c1_11	c1_1		YES								YES																		YES
SGSM2	c1_3	c1_11	c1_28	c1_44	c1_65	c1_72	c1_74	c1_1	c1_3	c1_11	c1_28	15	11.3927	0.24635	c1_74	c1_44	c1_11	c1_1		YES								YES																	YES
FBXO8	c1_3	c1_11		3	2.27273	1	NA	NA	c1_11	c1_1		YES								YES
MICU2	c1_3	c1_11	c1_29	c1_60	c1_68		4	3.20057	0.836733	c1_68	c1_29	c1_11	c1_1		YES								YES																		YES
RPS26	c1_3	c1_11	c1_32		6	4.44971	0.612977	c1_32	c1_32	c1_11	c1_1		YES								YES																					YES
NDUFA13	c1_3	c1_11		5	3.81207	0.711417	NA	NA	c1_11	c1_1		YES								YES
SLC26A5	c1_3	c1_11	c1_28	c1_44	c1_64		5	3.69974	0.71588	c1_64	c1_44	c1_11	c1_1		YES								YES																	YES
NR2F2	c1_2	c1_5	c1_19	c1_39		3	2.50294	1	c1_39	c1_39	c1_39	c1_1	YES			YES														YES
PREX1	c1_3	c1_11	c1_28	c1_44	c1_64		5	3.85057	0.714589	c1_64	c1_44	c1_11	c1_1		YES								YES																	YES
JADE3	c1_2	c1_4	c1_15		7	5.54334	0.431024	c1_15	c1_4	c1_4	c1_1	YES		YES											YES
LOC110471034	c1_3	c1_9		3	2.28091	0.683014	c1_9	c1_9	c1_9	c1_1		YES						YES
NUP62CL	c1_3	c1_11	c1_28	c1_44	c1_65	c1_72	c1_75		5	3.97898	0.70594	c1_75	c1_44	c1_11	c1_1		YES								YES																	YES
LOC110478412	c1_3	c1_11	c1_28	c1_44	c1_64		6	4.42134	0.618728	c1_64	c1_44	c1_11	c1_1		YES								YES																	YES
ISOC1	c1_3	c1_11	c1_33		6	4.49735	0.600918	c1_33	c1_33	c1_11	c1_1		YES								YES																						YES
GHITM	c1_3	c1_11	c1_28	c1_46	c1_66		13	9.88682	0.301978	c1_66	c1_46	c1_11	c1_1		YES								YES																	YES
TMEM218	c1_3	c1_11	c1_29	c1_59		12	8.91656	0.261981	c1_59	c1_29	c1_11	c1_1		YES								YES																		YES
SLC2A13	c1_3	c1_11	c1_28	c1_46	c1_66		4	3.02913	0.848472	c1_66	c1_46	c1_11	c1_1		YES								YES																	YES
DNAL1	c1_3	c1_11	c1_28	c1_44	c1_65	c1_72	c1_74		12	9.05563	0.329995	c1_74	c1_44	c1_11	c1_1		YES								YES																	YES
LOC110473273	c1_2	c1_4	c1_14	c1_1	c1_2	c1_4	26	18.5374	0.137172	c1_14	c1_4	c1_4	c1_1	YES		YES										YES
MCU	c1_2	c1_5	c1_22		9	6.92262	0.394609	c1_22	c1_22	c1_22	c1_1	YES			YES																	YES
CCSAP	c1_3	c1_11	c1_28	c1_44	c1_65	c1_72	c1_74		3	2.31848	1	c1_74	c1_44	c1_11	c1_1		YES								YES																	YES
ABCA3	c1_2	c1_5	c1_25		5	3.71531	0.625059	c1_25	c1_25	c1_25	c1_1	YES			YES																				YES
ULK1	c1_2	c1_5	c1_22		3	2.36302	1	c1_22	c1_22	c1_22	c1_1	YES			YES																	YES
USP8	c1_3	c1_11	c1_31		7	4.96867	0.470521	c1_31	c1_31	c1_11	c1_1		YES								YES																				YES
NAA20	c1_3	c1_11	c1_28	c1_44	c1_64		8	6.29279	0.469075	c1_64	c1_44	c1_11	c1_1		YES								YES																	YES
POLR2I	c1_3	c1_11	c1_28	c1_44	c1_64		14	10.2797	0.28516	c1_64	c1_44	c1_11	c1_1		YES								YES																	YES
UBE2D3	c1_3	c1_11	c1_29	c1_59	c1_1	c1_3	c1_11	c1_29	c1_59	22	16.5479	0.182482	c1_59	c1_29	c1_11	c1_1		YES								YES																		YES
USP16	c1_3	c1_11	c1_29	c1_59		11	7.63786	0.341533	c1_59	c1_29	c1_11	c1_1		YES								YES																		YES
PITPNB	c1_3	c1_11	c1_31		4	3.22013	0.828564	c1_31	c1_31	c1_11	c1_1		YES								YES																				YES
ZFYVE9	c1_3	c1_11	c1_28	c1_48		10	7.32012	0.368544	c1_48	c1_48	c1_11	c1_1		YES								YES																	YES
HSD17B4	c1_3	c1_11	c1_28	c1_44	c1_64		5	3.63882	0.710085	c1_64	c1_44	c1_11	c1_1		YES								YES																	YES
FOXRED1	c1_3	c1_11	c1_29	c1_59		5	3.70137	0.715769	c1_59	c1_29	c1_11	c1_1		YES								YES																		YES
RTN4R	c1_2	c1_5	c1_25		12	8.73704	0.311611	c1_25	c1_25	c1_25	c1_1	YES			YES																				YES
ABCG1	c1_3	c1_11		3	2.24127	1	NA	NA	c1_11	c1_1		YES								YES
ADSS1	c1_3	c1_13	c1_37		10	7.59565	0.364785	c1_37	c1_13	c1_13	c1_1		YES										YES																								YES
LOC110484122	c1_3	c1_11	c1_29	c1_59		4	3.09164	0.837264	c1_59	c1_29	c1_11	c1_1		YES								YES																		YES
SCAPER	c1_3	c1_11	c1_28	c1_44	c1_64		8	6.11455	0.475556	c1_64	c1_44	c1_11	c1_1		YES								YES																	YES
CAMK4	c1_3	c1_11	c1_29	c1_59		8	6.2844	0.471263	c1_59	c1_29	c1_11	c1_1		YES								YES																		YES
STIM2	c1_3	c1_13	c1_38		12	8.83676	0.329773	c1_38	c1_13	c1_13	c1_1		YES										YES																									YES
PATJ	c1_2	c1_4		4	2.90343	0.854303	NA	c1_4	c1_4	c1_1	YES		YES
COPZ1	c1_3	c1_11	c1_33		10	7.22205	0.387673	c1_33	c1_33	c1_11	c1_1		YES								YES																						YES
IRF2BP2	c1_2	c1_5	c1_19	c1_39		8	6.18271	0.477001	c1_39	c1_39	c1_39	c1_1	YES			YES														YES
TTLL12	c1_3	c1_11	c1_28	c1_44	c1_65	c1_72	c1_74		5	3.8902	0.707313	c1_74	c1_44	c1_11	c1_1		YES								YES																	YES
FAM184A	c1_3	c1_11	c1_28	c1_44	c1_64		6	4.63044	0.610794	c1_64	c1_44	c1_11	c1_1		YES								YES																	YES
USP31	c1_2	c1_4	c1_15	c1_1	c1_2	c1_4	c1_15	19	13.6518	0.210126	c1_15	c1_4	c1_4	c1_1	YES		YES											YES
BYSL	c1_2	c1_4	c1_15		9	6.46688	0.432301	c1_15	c1_4	c1_4	c1_1	YES		YES											YES
CACNA2D2	c1_2	c1_6		11	8.21603	0.314374	c1_6	c1_6	c1_6	c1_1	YES				YES
NEBL	c1_3	c1_11	c1_28	c1_44	c1_64		9	6.65756	0.42934	c1_64	c1_44	c1_11	c1_1		YES								YES																	YES
TBCD	c1_2	c1_4	c1_15		6	4.26877	0.553813	c1_15	c1_4	c1_4	c1_1	YES		YES											YES
YIPF4	c1_3	c1_13	c1_38		5	3.6836	0.707737	c1_38	c1_13	c1_13	c1_1		YES										YES																									YES
RABEPK	c1_2	c1_4	c1_15		6	4.36444	0.610557	c1_15	c1_4	c1_4	c1_1	YES		YES											YES
EDEM3	c1_2	c1_5	c1_19	c1_39		8	5.87677	0.478514	c1_39	c1_39	c1_39	c1_1	YES			YES														YES
C12H3orf18	c1_2	c1_5	c1_22		3	2.47425	1	c1_22	c1_22	c1_22	c1_1	YES			YES																	YES
LOC110478825	c1_3	c1_11	c1_28	c1_49		4	3.07258	0.835454	c1_49	c1_49	c1_11	c1_1		YES								YES																	YES
DENND5A	c1_3	c1_10		14	10.7203	0.282384	c1_10	c1_10	c1_10	c1_1		YES							YES
PEX11G	c1_3	c1_11	c1_32		7	5.13559	0.537773	c1_32	c1_32	c1_11	c1_1		YES								YES																					YES
KATNAL1	c1_2	c1_4	c1_15	c1_1	c1_2	c1_4	c1_15	23	16.7475	0.16748	c1_15	c1_4	c1_4	c1_1	YES		YES											YES
LOC110475832	c1_2	c1_5	c1_27		6	4.67028	0.604749	c1_27	c1_27	c1_27	c1_1	YES			YES																						YES
ABHD6	c1_2	c1_4	c1_14	c1_1	c1_2	c1_4	c1_14	35	25.2264	0.094594	c1_14	c1_4	c1_4	c1_1	YES		YES										YES
RPL29	c1_3	c1_9		8	5.76993	0.482961	c1_9	c1_9	c1_9	c1_1		YES						YES
SYT2	c1_2	c1_5	c1_20	c1_42		7	5.06668	0.491749	c1_42	c1_20	c1_20	c1_1	YES			YES															YES
GPR162	c1_2	c1_5	c1_23		7	4.75443	0.546529	c1_23	c1_23	c1_23	c1_1	YES			YES																		YES
CNKSR2	c1_3	c1_11	c1_28	c1_58		6	4.61407	0.604585	c1_58	c1_58	c1_11	c1_1		YES								YES																	YES
CDK2AP1	c1_3	c1_11	c1_28	c1_52		9	6.37417	0.430425	c1_52	c1_52	c1_11	c1_1		YES								YES																	YES
GRHPR	c1_3	c1_11	c1_28	c1_50		5	3.1711	0.696492	c1_50	c1_50	c1_11	c1_1		YES								YES																	YES
KANK3	c1_3	c1_11	c1_29	c1_59		4	3.02743	0.841585	c1_59	c1_29	c1_11	c1_1		YES								YES																		YES
SLC8A2	c1_3	c1_11	c1_28		7	5.08654	0.540251	NA	NA	c1_11	c1_1		YES								YES																	YES
SYNC	c1_3	c1_11	c1_28	c1_44	c1_65	c1_72	c1_74		8	5.75502	0.478958	c1_74	c1_44	c1_11	c1_1		YES								YES																	YES
SYT11	c1_2	c1_5	c1_20	c1_41		11	8.28726	0.333715	c1_41	c1_20	c1_20	c1_1	YES			YES															YES
ING1	c1_2	c1_5	c1_20	c1_43		6	4.29535	0.561087	c1_43	c1_20	c1_20	c1_1	YES			YES															YES
LOC110468182	c1_3	c1_11	c1_28	c1_46	c1_67		10	7.0901	0.389929	c1_67	c1_46	c1_11	c1_1		YES								YES																	YES
NCOA7	c1_3	c1_11		5	3.78332	0.707535	NA	NA	c1_11	c1_1		YES								YES
GATC	c1_3	c1_11	c1_29	c1_61		5	3.55042	0.512887	c1_61	c1_29	c1_11	c1_1		YES								YES																		YES
PVALB	c1_2	c1_5	c1_27		12	8.36736	0.328463	c1_27	c1_27	c1_27	c1_1	YES			YES																						YES
LOC110471090	c1_3	c1_13	c1_37		9	7.01487	0.419519	c1_37	c1_13	c1_13	c1_1		YES										YES																								YES
ACVR2A	c1_3	c1_9		5	3.66546	0.712031	c1_9	c1_9	c1_9	c1_1		YES						YES
CD82	c1_3	c1_11	c1_29	c1_59		11	7.82811	0.343487	c1_59	c1_29	c1_11	c1_1		YES								YES																		YES
JMY	c1_3	c1_11	c1_29	c1_60	c1_68		3	2.38564	1	c1_68	c1_29	c1_11	c1_1		YES								YES																		YES
PRRG3	c1_3	c1_11	c1_28	c1_44	c1_65	c1_72	c1_75		9	6.99898	0.425679	c1_75	c1_44	c1_11	c1_1		YES								YES																	YES
PACSIN2	c1_3	c1_11	c1_28	c1_44	c1_64		9	6.98234	0.424841	c1_64	c1_44	c1_11	c1_1		YES								YES																	YES
BBS7	c1_3	c1_11	c1_28	c1_44	c1_65	c1_72	c1_74		5	3.62025	0.710994	c1_74	c1_44	c1_11	c1_1		YES								YES																	YES
GRIN3A	c1_3	c1_11	c1_29	c1_59		5	3.65484	0.700199	c1_59	c1_29	c1_11	c1_1		YES								YES																		YES
STXBP1	c1_3	c1_13	c1_37		8	5.68463	0.434089	c1_37	c1_13	c1_13	c1_1		YES										YES																								YES
TMTC4	c1_2	c1_5	c1_19	c1_39		4	2.90713	0.846593	c1_39	c1_39	c1_39	c1_1	YES			YES														YES
STXBP5L	c1_2	c1_5	c1_22		7	4.89223	0.490195	c1_22	c1_22	c1_22	c1_1	YES			YES																	YES
SH3PXD2A	c1_2	c1_5	c1_22		10	7.4343	0.382027	c1_22	c1_22	c1_22	c1_1	YES			YES																	YES
FOXK1	c1_3	c1_11	c1_28	c1_46	c1_67		6	4.4318	0.605211	c1_67	c1_46	c1_11	c1_1		YES								YES																	YES
LOC110482369	c1_3	c1_11	c1_28	c1_54		10	7.3495	0.37132	c1_54	c1_54	c1_11	c1_1		YES								YES																	YES
PRAM1	c1_2	c1_4		5	3.78469	0.70518	NA	c1_4	c1_4	c1_1	YES		YES
IP6K2	c1_3	c1_11	c1_30		10	6.56607	0.37419	c1_30	c1_30	c1_11	c1_1		YES								YES																			YES
LRRC57	c1_2	c1_5	c1_19	c1_39		5	3.56151	0.717533	c1_39	c1_39	c1_39	c1_1	YES			YES														YES
UPF1	c1_2	c1_5	c1_25		8	5.68518	0.436297	c1_25	c1_25	c1_25	c1_1	YES			YES																				YES
MAST2	c1_2	c1_6		3	2.253	1	c1_6	c1_6	c1_6	c1_1	YES				YES
LGALSL	c1_3	c1_11	c1_29	c1_59		14	10.5373	0.273659	c1_59	c1_29	c1_11	c1_1		YES								YES																		YES
CDC42BPA	c1_3	c1_11	c1_28	c1_44	c1_64		6	4.51764	0.6	c1_64	c1_44	c1_11	c1_1		YES								YES																	YES
LHFPL6	c1_3	c1_13	c1_38		8	5.76226	0.474948	c1_38	c1_13	c1_13	c1_1		YES										YES																									YES
CARMIL1	c1_3	c1_11	c1_28	c1_58		8	5.50363	0.437438	c1_58	c1_58	c1_11	c1_1		YES								YES																	YES
NR4A3	c1_3	c1_11	c1_29	c1_59		10	7.23743	0.344307	c1_59	c1_29	c1_11	c1_1		YES								YES																		YES
LOC110472657	c1_2	c1_4	c1_15	c1_1	c1_2	c1_4	c1_15	19	13.1264	0.202564	c1_15	c1_4	c1_4	c1_1	YES		YES											YES
NOG	c1_3	c1_11	c1_29		8	5.96702	0.476121	NA	c1_29	c1_11	c1_1		YES								YES																		YES
LEF1	c1_3	c1_11	c1_28	c1_44	c1_65	c1_72	c1_74		5	3.92055	0.707194	c1_74	c1_44	c1_11	c1_1		YES								YES																	YES
TMED4	c1_3	c1_11	c1_28	c1_44	c1_64		12	8.79087	0.309233	c1_64	c1_44	c1_11	c1_1		YES								YES																	YES
RPS19BP1	c1_3	c1_11	c1_29	c1_59		10	7.25695	0.368631	c1_59	c1_29	c1_11	c1_1		YES								YES																		YES
PFKFB3	c1_2	c1_5		3	2.25503	1	NA	NA	NA	c1_1	YES			YES
EXOSC5	c1_3	c1_9		4	2.89327	0.844391	c1_9	c1_9	c1_9	c1_1		YES						YES
UBA2	c1_3	c1_11	c1_28	c1_44	c1_65	c1_72	c1_74		14	10.8539	0.280441	c1_74	c1_44	c1_11	c1_1		YES								YES																	YES
NACC2	c1_2	c1_5	c1_19	c1_39		3	2.41595	1	c1_39	c1_39	c1_39	c1_1	YES			YES														YES
TLE1	c1_3	c1_11	c1_34		9	6.65133	0.424961	c1_34	c1_34	c1_11	c1_1		YES								YES																							YES
TPPP3	c1_3	c1_11	c1_29	c1_60	c1_68		4	3.14818	0.840233	c1_68	c1_29	c1_11	c1_1		YES								YES																		YES
SLC4A5	c1_2	c1_4	c1_15		10	6.9677	0.396274	c1_15	c1_4	c1_4	c1_1	YES		YES											YES
RPS12	c1_3	c1_9		4	3.108	0.844716	c1_9	c1_9	c1_9	c1_1		YES						YES
KCNMA1	c1_3	c1_13	c1_37		4	3.14759	0.830201	c1_37	c1_13	c1_13	c1_1		YES										YES																								YES
OSBPL6	c1_3	c1_11	c1_28	c1_57		4	3.18652	0.831279	c1_57	c1_57	c1_11	c1_1		YES								YES																	YES
SLC17A6	c1_3	c1_10	c1_1	c1_3	c1_10	24	17.587	0.168109	c1_10	c1_10	c1_10	c1_1		YES							YES
DCUN1D1	c1_2	c1_5	c1_19	c1_40	c1_62	c1_70	c1_70	14	10.5198	0.243061	c1_70	c1_40	c1_40	c1_1	YES			YES														YES
PIN1	c1_3	c1_13	c1_37		5	3.19733	0.723144	c1_37	c1_13	c1_13	c1_1		YES										YES																								YES
RPL11	c1_3	c1_9		3	2.39751	1	c1_9	c1_9	c1_9	c1_1		YES						YES
LOC110470530	c1_3	c1_11	c1_28	c1_44	c1_64		4	3.20089	0.832064	c1_64	c1_44	c1_11	c1_1		YES								YES																	YES
DYRK3	c1_3	c1_11	c1_28	c1_44	c1_64		10	7.44438	0.387321	c1_64	c1_44	c1_11	c1_1		YES								YES																	YES
ITFG1	c1_3	c1_10		13	9.91435	0.29998	c1_10	c1_10	c1_10	c1_1		YES							YES
ARF3	c1_3	c1_9		6	4.53137	0.608687	c1_9	c1_9	c1_9	c1_1		YES						YES
RPS24	c1_3	c1_9		5	3.65994	0.713368	c1_9	c1_9	c1_9	c1_1		YES						YES
nbis-27	c1_3	c1_11	c1_32		3	2.17435	1	c1_32	c1_32	c1_11	c1_1		YES								YES																					YES
ATXN7L1	c1_2	c1_5	c1_25		9	6.61381	0.427454	c1_25	c1_25	c1_25	c1_1	YES			YES																				YES
LOC110470319	c1_3	c1_11	c1_28	c1_44	c1_64		5	3.36172	0.719027	c1_64	c1_44	c1_11	c1_1		YES								YES																	YES
NADK2	c1_2		6	4.80398	0.533216	NA	NA	NA	c1_1	YES
CPEB3	c1_2	c1_4	c1_14		8	5.81768	0.440108	c1_14	c1_4	c1_4	c1_1	YES		YES										YES
ERC2	c1_2	c1_5	c1_19	c1_39		7	5.44304	0.531125	c1_39	c1_39	c1_39	c1_1	YES			YES														YES
TOP1	c1_3	c1_11	c1_29	c1_59		9	6.62501	0.427694	c1_59	c1_29	c1_11	c1_1		YES								YES																		YES
TMEM121	c1_2	c1_5	c1_19	c1_39		8	5.43119	0.376707	c1_39	c1_39	c1_39	c1_1	YES			YES														YES
KIAA0319L	c1_3	c1_11	c1_28	c1_55		7	4.74515	0.546752	c1_55	c1_55	c1_11	c1_1		YES								YES																	YES
RICTOR	c1_2	c1_5	c1_25		5	3.71246	0.707041	c1_25	c1_25	c1_25	c1_1	YES			YES																				YES
NRCAM	c1_2	c1_5	c1_27		13	8.91164	0.283394	c1_27	c1_27	c1_27	c1_1	YES			YES																						YES
LOC110470685	c1_2	c1_5	c1_25		5	3.83718	0.709471	c1_25	c1_25	c1_25	c1_1	YES			YES																				YES
MRPL27	c1_2	c1_5	c1_24		8	5.64774	0.478047	c1_24	c1_24	c1_24	c1_1	YES			YES																			YES
IVD	c1_3	c1_10		6	4.24895	0.61705	c1_10	c1_10	c1_10	c1_1		YES							YES
PSMF1	c1_2	c1_5	c1_25		9	6.51287	0.426002	c1_25	c1_25	c1_25	c1_1	YES			YES																				YES
NRDE2	c1_3	c1_12		3	2.39251	1	c1_12	c1_12	c1_12	c1_1		YES									YES
KCNS1	c1_3	c1_11	c1_28	c1_44	c1_65	c1_72	c1_75		8	6.15533	0.478432	c1_75	c1_44	c1_11	c1_1		YES								YES																	YES
RNF2	c1_2	c1_5		5	3.74114	0.705434	NA	NA	NA	c1_1	YES			YES
RPS13	c1_3	c1_9	c1_1	c1_3	c1_9	21	16.232	0.182428	c1_9	c1_9	c1_9	c1_1		YES						YES
LMO7	c1_3	c1_11	c1_29	c1_61		13	9.40198	0.299987	c1_61	c1_29	c1_11	c1_1		YES								YES																		YES
FAM81A	c1_3	c1_11	c1_29	c1_59	c1_1	c1_3	c1_11	c1_29	17	12.7742	0.231673	c1_59	c1_29	c1_11	c1_1		YES								YES																		YES
NARS1	c1_3	c1_11	c1_31		3	2.33487	1	c1_31	c1_31	c1_11	c1_1		YES								YES																				YES
HEATR5B	c1_3	c1_11	c1_28	c1_44	c1_65	c1_72	c1_74		3	2.4096	1	c1_74	c1_44	c1_11	c1_1		YES								YES																	YES
ACAT1	c1_3	c1_11	c1_28	c1_44	c1_64		4	3.1645	0.832316	c1_64	c1_44	c1_11	c1_1		YES								YES																	YES
DISC1	c1_3	c1_11	c1_28	c1_44	c1_65	c1_72	c1_74		4	3.1283	0.836832	c1_74	c1_44	c1_11	c1_1		YES								YES																	YES
KCTD4	c1_3	c1_11	c1_28	c1_44	c1_64		8	5.52157	0.441438	c1_64	c1_44	c1_11	c1_1		YES								YES																	YES
ATP1B2	c1_3	c1_9		4	3.09964	0.840569	c1_9	c1_9	c1_9	c1_1		YES						YES
GNAI3	c1_3	c1_13	c1_37		3	2.26044	1	c1_37	c1_13	c1_13	c1_1		YES										YES																								YES
COP1	c1_3	c1_11	c1_28	c1_44	c1_65	c1_72	c1_74		3	2.19885	1	c1_74	c1_44	c1_11	c1_1		YES								YES																	YES
TPBGL	c1_2	c1_5	c1_20	c1_42		13	9.2311	0.293828	c1_42	c1_20	c1_20	c1_1	YES			YES															YES
TAFA1	c1_3	c1_11	c1_29	c1_59		3	2.44143	1	c1_59	c1_29	c1_11	c1_1		YES								YES																		YES
BDNF	c1_3	c1_11	c1_28	c1_44	c1_65	c1_72	c1_74		11	8.19714	0.346194	c1_74	c1_44	c1_11	c1_1		YES								YES																	YES
MTMR9	c1_2	c1_5	c1_25	c1_1	c1_2	c1_5	c1_25	28	20.3866	0.127378	c1_25	c1_25	c1_25	c1_1	YES			YES																				YES
MBD4	c1_2	c1_4	c1_15		12	8.31493	0.310054	c1_15	c1_4	c1_4	c1_1	YES		YES											YES
ADARB1	c1_2	c1_4	c1_15		4	3.01075	0.841118	c1_15	c1_4	c1_4	c1_1	YES		YES											YES
MEF2C	c1_3	c1_11	c1_29	c1_60	c1_68		8	5.70014	0.404007	c1_68	c1_29	c1_11	c1_1		YES								YES																		YES
DST	c1_3	c1_11	c1_28	c1_44	c1_65	c1_72	c1_75		6	4.26044	0.606464	c1_75	c1_44	c1_11	c1_1		YES								YES																	YES
CCDC90B	c1_3	c1_11	c1_28	c1_44	c1_65	c1_72	c1_74		5	3.76434	0.607451	c1_74	c1_44	c1_11	c1_1		YES								YES																	YES
SCN4B	c1_2	c1_4	c1_15		8	5.69341	0.481402	c1_15	c1_4	c1_4	c1_1	YES		YES											YES
ATP2B1	c1_3	c1_11	c1_28	c1_44	c1_65	c1_72	c1_74		4	3.2454	0.836208	c1_74	c1_44	c1_11	c1_1		YES								YES																	YES
LOC110468197	c1_2	c1_4	c1_15		13	8.64947	0.276337	c1_15	c1_4	c1_4	c1_1	YES		YES											YES
CAMTA1	c1_2	c1_5	c1_22	c1_1	18	12.9927	0.222508	c1_22	c1_22	c1_22	c1_1	YES			YES																	YES
DHRSX	c1_2	c1_4	c1_16		3	2.12519	1	c1_16	c1_4	c1_4	c1_1	YES		YES												YES
MMAA	c1_2	c1_5	c1_19	c1_40	c1_62	c1_70		5	3.61143	0.522223	c1_70	c1_40	c1_40	c1_1	YES			YES														YES
CAMK2N1	c1_2	c1_5	c1_25		14	9.73616	0.273436	c1_25	c1_25	c1_25	c1_1	YES			YES																				YES
FGF5	c1_2	c1_4	c1_15	c1_1	c1_2	c1_4	15	11.2038	0.233736	c1_15	c1_4	c1_4	c1_1	YES		YES											YES
TMEM178B	c1_3	c1_11	c1_28	c1_44	c1_64		4	3.13043	0.842151	c1_64	c1_44	c1_11	c1_1		YES								YES																	YES
PGPEP1	c1_3	c1_11		4	3.00015	0.683862	NA	NA	c1_11	c1_1		YES								YES
PTPRE	c1_2	c1_4	c1_15		5	3.91041	0.703482	c1_15	c1_4	c1_4	c1_1	YES		YES											YES
CDCA4	c1_3	c1_11	c1_28	c1_44	c1_65	c1_72	c1_74		8	5.7155	0.47601	c1_74	c1_44	c1_11	c1_1		YES								YES																	YES
LOC110474783	c1_3	c1_11	c1_28	c1_44	c1_64		5	3.61487	0.711294	c1_64	c1_44	c1_11	c1_1		YES								YES																	YES
GSE1	c1_3	c1_11	c1_28	c1_44	c1_65	c1_72	c1_74		5	3.73139	0.715023	c1_74	c1_44	c1_11	c1_1		YES								YES																	YES
LOC110470362	c1_3	c1_11	c1_28	c1_58		7	5.26853	0.529399	c1_58	c1_58	c1_11	c1_1		YES								YES																	YES
PIM3	c1_3	c1_11	c1_31		12	8.74479	0.328075	c1_31	c1_31	c1_11	c1_1		YES								YES																				YES
SEC22A	c1_2	c1_5	c1_24		9	5.97194	0.374916	c1_24	c1_24	c1_24	c1_1	YES			YES																			YES
PDLIM5	c1_3	c1_13	c1_37		4	3.05318	0.836989	c1_37	c1_13	c1_13	c1_1		YES										YES																								YES
ZDHHC8	c1_2	c1_5	c1_19	c1_39		5	3.5957	0.71604	c1_39	c1_39	c1_39	c1_1	YES			YES														YES
COG3	c1_2	c1_4	c1_15		4	2.86732	0.825486	c1_15	c1_4	c1_4	c1_1	YES		YES											YES
ARF1	c1_3	c1_10	c1_1	c1_3	20	15.281	0.198538	c1_10	c1_10	c1_10	c1_1		YES							YES
CST7	c1_2	c1_6		10	7.193	0.366414	c1_6	c1_6	c1_6	c1_1	YES				YES
KIDINS220	c1_3	c1_10		8	5.5826	0.478417	c1_10	c1_10	c1_10	c1_1		YES							YES
PSMD12	c1_3	c1_11		4	2.79797	0.678349	NA	NA	c1_11	c1_1		YES								YES
MLXIP	c1_2	c1_4	c1_14		3	2.25376	1	c1_14	c1_4	c1_4	c1_1	YES		YES										YES
LOC116184632	c1_3	c1_11	c1_32		6	4.55377	0.600681	c1_32	c1_32	c1_11	c1_1		YES								YES																					YES
RNF149	c1_3	c1_11	c1_34		8	5.57278	0.478809	c1_34	c1_34	c1_11	c1_1		YES								YES																							YES
CRIP1	c1_2	c1_4	c1_15		9	6.43519	0.422702	c1_15	c1_4	c1_4	c1_1	YES		YES											YES
COPS6	c1_3	c1_11	c1_28	c1_44	c1_65	c1_73		6	4.4531	0.619912	c1_73	c1_44	c1_11	c1_1		YES								YES																	YES
TEX2	c1_3	c1_11	c1_28		4	2.98006	0.838686	NA	NA	c1_11	c1_1		YES								YES																	YES
LZTS3	c1_2	c1_4	c1_15		14	10.0559	0.271122	c1_15	c1_4	c1_4	c1_1	YES		YES											YES
FOXO3	c1_3	c1_11	c1_28	c1_44	c1_65	c1_72	c1_74		14	10.4961	0.260753	c1_74	c1_44	c1_11	c1_1		YES								YES																	YES
GPRC5B	c1_3	c1_11	c1_28	c1_44	c1_64		5	3.6423	0.621022	c1_64	c1_44	c1_11	c1_1		YES								YES																	YES
LOC110483195	c1_2	c1_5	c1_25		5	3.58939	0.622994	c1_25	c1_25	c1_25	c1_1	YES			YES																				YES
LOC110484224	c1_3	c1_11	c1_28	c1_44	c1_65	c1_72	c1_74		9	6.76538	0.425608	c1_74	c1_44	c1_11	c1_1		YES								YES																	YES
ARPC2	c1_3	c1_11	c1_28	c1_44	c1_65	c1_73		3	2.32692	1	c1_73	c1_44	c1_11	c1_1		YES								YES																	YES
KNDC1	c1_3	c1_11	c1_28	c1_57		5	3.53565	0.691769	c1_57	c1_57	c1_11	c1_1		YES								YES																	YES
RNF11	c1_3	c1_13	c1_38		4	2.98821	0.836991	c1_38	c1_13	c1_13	c1_1		YES										YES																									YES
NELL2	c1_3	c1_11	c1_28	c1_44	c1_65	c1_72	c1_75		8	6.06432	0.476942	c1_75	c1_44	c1_11	c1_1		YES								YES																	YES
LHX8	c1_2	c1_4	c1_14		5	3.10108	0.691858	c1_14	c1_4	c1_4	c1_1	YES		YES										YES
SPCS1	c1_3	c1_11	c1_28	c1_44	c1_65	c1_72	c1_74		5	3.42661	0.724213	c1_74	c1_44	c1_11	c1_1		YES								YES																	YES
VPS4B	c1_3	c1_11	c1_28	c1_44	c1_64		5	3.56917	0.714042	c1_64	c1_44	c1_11	c1_1		YES								YES																	YES
LUZP2	c1_3	c1_11	c1_28	c1_44	c1_65	c1_72	c1_74		13	9.86158	0.275674	c1_74	c1_44	c1_11	c1_1		YES								YES																	YES
SURF6	c1_3	c1_11	c1_28		5	3.7299	0.702649	NA	NA	c1_11	c1_1		YES								YES																	YES
SUPT16H	c1_3	c1_11	c1_34		10	7.06741	0.390216	c1_34	c1_34	c1_11	c1_1		YES								YES																							YES
FBXW4	c1_3	c1_11	c1_28	c1_44	c1_65	c1_72	c1_75		5	3.75122	0.715627	c1_75	c1_44	c1_11	c1_1		YES								YES																	YES
IL1RAPL2	c1_2	c1_6		10	7.40626	0.381671	c1_6	c1_6	c1_6	c1_1	YES				YES
RNF157	c1_2	c1_5	c1_19	c1_39		3	2.23406	1	c1_39	c1_39	c1_39	c1_1	YES			YES														YES
AGTPBP1	c1_2	c1_4	c1_16	c1_16	8	6.13774	0.471644	c1_16	c1_4	c1_4	c1_1	YES		YES												YES
NPR2	c1_2	c1_4	c1_15		3	2.32946	1	c1_15	c1_4	c1_4	c1_1	YES		YES											YES
PLP1	c1_2	c1_5	c1_27		6	4.09283	0.484963	c1_27	c1_27	c1_27	c1_1	YES			YES																						YES
SSX2IP	c1_3	c1_11	c1_28	c1_44	c1_64		3	2.28367	1	c1_64	c1_44	c1_11	c1_1		YES								YES																	YES
ABRAXAS2	c1_3	c1_11	c1_28	c1_44	c1_65	c1_72	c1_74		8	6.0908	0.395861	c1_74	c1_44	c1_11	c1_1		YES								YES																	YES
RBBP4	c1_2	c1_5	c1_27		8	5.8514	0.443712	c1_27	c1_27	c1_27	c1_1	YES			YES																						YES
TIMM21	c1_2	c1_4	c1_14		9	6.76814	0.396576	c1_14	c1_4	c1_4	c1_1	YES		YES										YES
ACKR3	c1_3	c1_11	c1_29	c1_59		7	5.42128	0.527275	c1_59	c1_29	c1_11	c1_1		YES								YES																		YES
FEZF2	c1_3	c1_9		4	2.82092	0.853684	c1_9	c1_9	c1_9	c1_1		YES						YES
RAD54L	c1_2	c1_4	c1_15		7	5.09668	0.483979	c1_15	c1_4	c1_4	c1_1	YES		YES											YES
STMN2	c1_3	c1_11	c1_28	c1_44	c1_65	c1_72	c1_74		7	5.3579	0.531801	c1_74	c1_44	c1_11	c1_1		YES								YES																	YES
TRARG1	c1_2	c1_5	c1_19	c1_40	c1_62		6	4.8016	0.4	NA	c1_40	c1_40	c1_1	YES			YES														YES
INPP5K	c1_3	c1_11	c1_34	c1_34	11	7.52355	0.324028	c1_34	c1_34	c1_11	c1_1		YES								YES																							YES
MTR	c1_2	c1_6		5	3.51932	0.627044	c1_6	c1_6	c1_6	c1_1	YES				YES
ATOH8	c1_3	c1_13	c1_37		4	3.13745	0.666667	c1_37	c1_13	c1_13	c1_1		YES										YES																								YES
BRD2	c1_3	c1_11	c1_29	c1_59		3	2.1958	1	c1_59	c1_29	c1_11	c1_1		YES								YES																		YES
LOC110483620	c1_3	c1_11	c1_29	c1_59		2	1.34752	1	c1_59	c1_29	c1_11	c1_1		YES								YES																		YES
R3HDM2	c1_3	c1_11	c1_28		3	2.26239	1	NA	NA	c1_11	c1_1		YES								YES																	YES
LOC110484493	c1_2	c1_5	c1_20	c1_41	c1_1	c1_2	c1_5	c1_20	c1_41	17	12.6602	0.221235	c1_41	c1_20	c1_20	c1_1	YES			YES															YES
OSBPL10	c1_2	c1_4	c1_14		5	3.83953	0.701845	c1_14	c1_4	c1_4	c1_1	YES		YES										YES
DAB2	c1_3	c1_11	c1_28		7	5.35205	0.533902	NA	NA	c1_11	c1_1		YES								YES																	YES
GRIP2	c1_2	c1_5	c1_19	c1_39		5	4.05358	0.718656	c1_39	c1_39	c1_39	c1_1	YES			YES														YES
USH2A	c1_3	c1_11	c1_28		3	2.24653	1	NA	NA	c1_11	c1_1		YES								YES																	YES
LEPROTL1	c1_2	c1_5	c1_19	c1_39		6	4.25271	0.491174	c1_39	c1_39	c1_39	c1_1	YES			YES														YES
LOC110471139	c1_3	c1_11	c1_28	c1_44	c1_64		6	4.31981	0.610037	c1_64	c1_44	c1_11	c1_1		YES								YES																	YES
SAMD11	c1_2	c1_4	c1_15		5	3.60852	0.59664	c1_15	c1_4	c1_4	c1_1	YES		YES											YES
SLC20A1	c1_2	c1_5	c1_19	c1_39		4	3.02382	0.840661	c1_39	c1_39	c1_39	c1_1	YES			YES														YES
UCHL3	c1_3	c1_11	c1_28	c1_49		6	4.44151	0.605779	c1_49	c1_49	c1_11	c1_1		YES								YES																	YES
ZMIZ1	c1_2	c1_5	c1_19	c1_39		4	2.82488	0.836891	c1_39	c1_39	c1_39	c1_1	YES			YES														YES
LYPD1	c1_3	c1_11	c1_29	c1_60	c1_68		4	3.10683	0.834158	c1_68	c1_29	c1_11	c1_1		YES								YES																		YES
KCNH7	c1_2	c1_4	c1_15		8	5.79145	0.468501	c1_15	c1_4	c1_4	c1_1	YES		YES											YES
ATXN2	c1_3	c1_11	c1_29	c1_60	c1_68		3	2.25739	1	c1_68	c1_29	c1_11	c1_1		YES								YES																		YES
SIAH1	c1_3	c1_11	c1_34		6	4.2774	0.61949	c1_34	c1_34	c1_11	c1_1		YES								YES																							YES
ABLIM2	c1_3	c1_11	c1_28	c1_44	c1_65	c1_73		4	3.05487	0.836855	c1_73	c1_44	c1_11	c1_1		YES								YES																	YES
GCNT2	c1_2	c1_6		10	7.62711	0.38161	c1_6	c1_6	c1_6	c1_1	YES				YES
PPME1	c1_3	c1_11	c1_28	c1_44	c1_65	c1_72	c1_75		4	2.95754	0.833711	c1_75	c1_44	c1_11	c1_1		YES								YES																	YES
RSL1D1	c1_3	c1_11	c1_28		12	9.18485	0.325811	NA	NA	c1_11	c1_1		YES								YES																	YES
CRKL	c1_2	c1_5	c1_20	c1_42		4	2.64833	0.525414	c1_42	c1_20	c1_20	c1_1	YES			YES															YES
MTERF2	c1_3	c1_11	c1_28	c1_44	c1_64		4	2.76873	0.84596	c1_64	c1_44	c1_11	c1_1		YES								YES																	YES
LOC110478247	c1_3	c1_9		11	8.39579	0.317084	c1_9	c1_9	c1_9	c1_1		YES						YES
KPNA6	c1_2	c1_4	c1_15		9	6.00365	0.402446	c1_15	c1_4	c1_4	c1_1	YES		YES											YES
SECISBP2L	c1_2	c1_4	c1_14		11	7.49902	0.300705	c1_14	c1_4	c1_4	c1_1	YES		YES										YES
ZMAT4	c1_3	c1_11	c1_28	c1_44	c1_65	c1_72	c1_75		3	2.14493	1	c1_75	c1_44	c1_11	c1_1		YES								YES																	YES
TMEM131L	c1_3	c1_11	c1_28	c1_44	c1_65	c1_72	c1_74		5	3.65961	0.712592	c1_74	c1_44	c1_11	c1_1		YES								YES																	YES
SCP2	c1_3	c1_13	c1_37		3	2.2665	1	c1_37	c1_13	c1_13	c1_1		YES										YES																								YES
LOC116184761	c1_3	c1_11	c1_28	c1_44	c1_65	c1_72	c1_74		12	9.37681	0.327355	c1_74	c1_44	c1_11	c1_1		YES								YES																	YES
FIBCD1	c1_2	c1_4	c1_14		14	9.61522	0.260883	c1_14	c1_4	c1_4	c1_1	YES		YES										YES
ZYG11B	c1_2	c1_5	c1_19	c1_40	c1_62	c1_70		4	2.88805	0.839858	c1_70	c1_40	c1_40	c1_1	YES			YES														YES
BOLA3	c1_3	c1_9		5	3.89895	0.704045	c1_9	c1_9	c1_9	c1_1		YES						YES
INPP5J	c1_2	c1_4	c1_14		8	5.711	0.432128	c1_14	c1_4	c1_4	c1_1	YES		YES										YES
CEP57L1	c1_3	c1_11	c1_29	c1_60	c1_68		6	4.52389	0.602647	c1_68	c1_29	c1_11	c1_1		YES								YES																		YES
GABRD	c1_2	c1_4	c1_14		5	3.42886	0.708863	c1_14	c1_4	c1_4	c1_1	YES		YES										YES
WNT7A	c1_3	c1_11	c1_28	c1_44	c1_65	c1_72	c1_75		3	2.18036	1	c1_75	c1_44	c1_11	c1_1		YES								YES																	YES
CACNG4	c1_3	c1_11	c1_29	c1_60	c1_68		5	3.76942	0.599327	c1_68	c1_29	c1_11	c1_1		YES								YES																		YES
VPS36	c1_3	c1_11	c1_28	c1_48		7	4.97307	0.535987	c1_48	c1_48	c1_11	c1_1		YES								YES																	YES
RIOX2	c1_3	c1_11	c1_28	c1_44	c1_65	c1_72	c1_75		5	3.84942	0.699659	c1_75	c1_44	c1_11	c1_1		YES								YES																	YES
ARID4A	c1_3	c1_11	c1_28	c1_44	c1_65	c1_73		9	6.67269	0.428486	c1_73	c1_44	c1_11	c1_1		YES								YES																	YES
MCRIP1	c1_2	c1_4	c1_15		8	5.52864	0.476564	c1_15	c1_4	c1_4	c1_1	YES		YES											YES
LOC110468599	c1_3	c1_11	c1_28	c1_44	c1_65	c1_73		3	2.30524	1	c1_73	c1_44	c1_11	c1_1		YES								YES																	YES
EPB41L1	c1_2	c1_4	c1_14		14	9.73125	0.250074	c1_14	c1_4	c1_4	c1_1	YES		YES										YES
IFIH1	c1_3	c1_11	c1_29	c1_60	c1_68		4	3.04347	0.839466	c1_68	c1_29	c1_11	c1_1		YES								YES																		YES
DYRK4	c1_3	c1_11	c1_28	c1_44	c1_64		4	2.69137	0.859011	c1_64	c1_44	c1_11	c1_1		YES								YES																	YES
RLF	c1_3	c1_13	c1_37		6	4.27722	0.476628	c1_37	c1_13	c1_13	c1_1		YES										YES																								YES
MNS1	c1_3	c1_11	c1_28	c1_44	c1_64		4	2.82196	0.847046	c1_64	c1_44	c1_11	c1_1		YES								YES																	YES
PCDH11X	c1_3	c1_11	c1_29	c1_59		5	3.63641	0.688959	c1_59	c1_29	c1_11	c1_1		YES								YES																		YES
U2SURP	c1_3	c1_11	c1_28	c1_44	c1_64		6	4.11247	0.491803	c1_64	c1_44	c1_11	c1_1		YES								YES																	YES
CCPG1	c1_3	c1_11	c1_28	c1_44	c1_64		8	6.00472	0.473807	c1_64	c1_44	c1_11	c1_1		YES								YES																	YES
HEATR5A	c1_2	c1_4	c1_14		8	5.65689	0.439659	c1_14	c1_4	c1_4	c1_1	YES		YES										YES
LOC110481881	c1_3	c1_11	c1_28	c1_44	c1_64		6	4.61149	0.606182	c1_64	c1_44	c1_11	c1_1		YES								YES																	YES
FXYD2	c1_2	c1_5	c1_25		5	3.58005	0.696321	c1_25	c1_25	c1_25	c1_1	YES			YES																				YES
NAT8L	c1_2	c1_5	c1_22		5	3.80075	0.705838	c1_22	c1_22	c1_22	c1_1	YES			YES																	YES
ACVR1	c1_3	c1_11	c1_28	c1_55		8	5.56662	0.477481	c1_55	c1_55	c1_11	c1_1		YES								YES																	YES
BCHE	c1_2	c1_4	c1_14	c1_1	c1_2	c1_4	24	17.4466	0.152263	c1_14	c1_4	c1_4	c1_1	YES		YES										YES
CCDC14	c1_3	c1_9		3	2.23383	1	c1_9	c1_9	c1_9	c1_1		YES						YES
QSOX2	c1_2	c1_5	c1_25		5	3.49688	0.697342	c1_25	c1_25	c1_25	c1_1	YES			YES																				YES
VAMP1	c1_3	c1_11	c1_28	c1_52		7	5.09391	0.531493	c1_52	c1_52	c1_11	c1_1		YES								YES																	YES
TTLL1	c1_2	c1_5	c1_19	c1_39		4	2.90296	0.832777	c1_39	c1_39	c1_39	c1_1	YES			YES														YES
CA10	c1_2	c1_5	c1_19	c1_39		4	2.96015	0.837099	c1_39	c1_39	c1_39	c1_1	YES			YES														YES
NEFL	c1_2	c1_5	c1_20	c1_42		8	5.96122	0.472996	c1_42	c1_20	c1_20	c1_1	YES			YES															YES
ARPP19	c1_3	c1_11	c1_29	c1_60	c1_68	c1_1	c1_3	c1_11	c1_29	c1_60	c1_68	22	15.7819	0.179477	c1_68	c1_29	c1_11	c1_1		YES								YES																		YES
VGLL3	c1_2	c1_4	c1_15		13	8.77486	0.279266	c1_15	c1_4	c1_4	c1_1	YES		YES											YES
PCF11	c1_3	c1_11	c1_29	c1_59		3	2.08608	1	c1_59	c1_29	c1_11	c1_1		YES								YES																		YES
ZBTB26	c1_3	c1_11	c1_35		5	3.39541	0.408994	c1_35	c1_35	c1_11	c1_1		YES								YES																								YES
STK16	c1_3	c1_11	c1_28	c1_46	c1_67		4	2.79502	0.843678	c1_67	c1_46	c1_11	c1_1		YES								YES																	YES
IFITM10	c1_3	c1_11	c1_28	c1_44	c1_64		4	3.14434	0.836707	c1_64	c1_44	c1_11	c1_1		YES								YES																	YES
LOC110479031	c1_3	c1_11	c1_28	c1_46	c1_66		5	3.89602	0.701204	c1_66	c1_46	c1_11	c1_1		YES								YES																	YES
FBXW7	c1_3	c1_11	c1_28	c1_54		3	2.18176	1	c1_54	c1_54	c1_11	c1_1		YES								YES																	YES
SYTL1	c1_3	c1_11	c1_28		3	2.19015	1	NA	NA	c1_11	c1_1		YES								YES																	YES
LMOD1	c1_3	c1_11	c1_28		3	2.24953	1	NA	NA	c1_11	c1_1		YES								YES																	YES
C21H1orf174	c1_2	c1_5	c1_19	c1_39		4	2.88184	0.8383	c1_39	c1_39	c1_39	c1_1	YES			YES														YES
PSMD1	c1_3	c1_11	c1_28	c1_44	c1_65	c1_72	c1_74		5	3.71415	0.705514	c1_74	c1_44	c1_11	c1_1		YES								YES																	YES
LOC110468846	c1_3	c1_10		4	3.11036	0.830275	c1_10	c1_10	c1_10	c1_1		YES							YES
SLC6A11	c1_3	c1_11	c1_28		4	2.94695	0.841896	NA	NA	c1_11	c1_1		YES								YES																	YES
TRAPPC1	c1_3	c1_11	c1_28	c1_44	c1_65	c1_73		5	3.6169	0.628085	c1_73	c1_44	c1_11	c1_1		YES								YES																	YES
SLC39A11	c1_2	c1_5	c1_23		6	3.90546	0.618183	c1_23	c1_23	c1_23	c1_1	YES			YES																		YES
GPR37	c1_3	c1_11	c1_28	c1_53	c1_53	5	3.50585	0.707567	c1_53	c1_53	c1_11	c1_1		YES								YES																	YES
LOC116184187	c1_3	c1_11	c1_28	c1_46	c1_66		8	5.71866	0.468743	c1_66	c1_46	c1_11	c1_1		YES								YES																	YES
SLC44A5	c1_3	c1_13	c1_37		3	2.07917	1	c1_37	c1_13	c1_13	c1_1		YES										YES																								YES
SCN1B	c1_2	c1_5	c1_27		8	5.64073	0.471253	c1_27	c1_27	c1_27	c1_1	YES			YES																						YES
IFT80	c1_3	c1_11	c1_28	c1_44	c1_65	c1_72	c1_74		4	2.89187	0.83542	c1_74	c1_44	c1_11	c1_1		YES								YES																	YES
CFH	c1_2	c1_5	c1_19	c1_40	c1_62	c1_70		3	2.07012	1	c1_70	c1_40	c1_40	c1_1	YES			YES														YES
ZDHHC3	c1_3	c1_13	c1_37		11	8.703	0.34759	c1_37	c1_13	c1_13	c1_1		YES										YES																								YES
TTC37	c1_2	c1_7		6	4.24022	0.549038	c1_7	c1_7	c1_7	c1_1	YES					YES
SRD5A2	c1_3	c1_11	c1_28	c1_44	c1_65	c1_72	c1_74		4	3.09069	0.827977	c1_74	c1_44	c1_11	c1_1		YES								YES																	YES
ESD	c1_3	c1_11	c1_31		5	3.54332	0.710575	c1_31	c1_31	c1_11	c1_1		YES								YES																				YES
VPS50	c1_2	c1_5	c1_20	c1_41	c1_1	c1_2	c1_5	c1_20	16	11.2925	0.245804	c1_41	c1_20	c1_20	c1_1	YES			YES															YES
LOC110475992	c1_2	c1_5	c1_19	c1_40	c1_62	c1_71	c1_71	6	4.24686	0.618614	c1_71	c1_40	c1_40	c1_1	YES			YES														YES
TGFBRAP1	c1_3	c1_11	c1_28	c1_52		3	2.23698	1	c1_52	c1_52	c1_11	c1_1		YES								YES																	YES
ZBTB38	c1_3	c1_11	c1_28	c1_44	c1_65	c1_72	c1_74		8	6.08439	0.46711	c1_74	c1_44	c1_11	c1_1		YES								YES																	YES
RNF20	c1_3	c1_13	c1_37		3	2.34433	1	c1_37	c1_13	c1_13	c1_1		YES										YES																								YES
UBTD1	c1_2	c1_4	c1_14		7	4.88379	0.531737	c1_14	c1_4	c1_4	c1_1	YES		YES										YES
VCAM1	c1_3	c1_9		5	3.3771	0.627369	c1_9	c1_9	c1_9	c1_1		YES						YES
UHMK1	c1_2	c1_5	c1_27		3	2.14919	1	c1_27	c1_27	c1_27	c1_1	YES			YES																						YES
HPCAL4	c1_2	c1_4	c1_15		3	2.24082	1	c1_15	c1_4	c1_4	c1_1	YES		YES											YES
ZZEF1	c1_2	c1_5	c1_19	c1_40	c1_63		5	3.35291	0.708308	c1_63	c1_40	c1_40	c1_1	YES			YES														YES
GFRA1	c1_3	c1_11	c1_28	c1_44	c1_65	c1_72	c1_74		6	4.24748	0.548194	c1_74	c1_44	c1_11	c1_1		YES								YES																	YES
LOC110480977	c1_3	c1_11	c1_29	c1_59		7	4.68128	0.447696	c1_59	c1_29	c1_11	c1_1		YES								YES																		YES
MRPL52	c1_3	c1_11	c1_32		7	5.14061	0.533181	c1_32	c1_32	c1_11	c1_1		YES								YES																					YES
KIFC3	c1_3	c1_11	c1_28		3	2.22713	1	NA	NA	c1_11	c1_1		YES								YES																	YES
RSRC2	c1_3	c1_11	c1_31		6	4.41617	0.601561	c1_31	c1_31	c1_11	c1_1		YES								YES																				YES
PWP1	c1_3	c1_11	c1_29	c1_59		4	2.89315	0.832116	c1_59	c1_29	c1_11	c1_1		YES								YES																		YES
DUSP14	c1_3	c1_11	c1_28	c1_44	c1_64		4	2.94119	0.834791	c1_64	c1_44	c1_11	c1_1		YES								YES																	YES
MGARP	c1_3	c1_11	c1_28	c1_46	c1_67		5	3.52958	0.714831	c1_67	c1_46	c1_11	c1_1		YES								YES																	YES
BACH1	c1_3	c1_11	c1_28	c1_58		6	4.52893	0.602522	c1_58	c1_58	c1_11	c1_1		YES								YES																	YES
LOC110482849	c1_2	c1_4	c1_15		7	4.67654	0.487343	c1_15	c1_4	c1_4	c1_1	YES		YES											YES
HSPD1	c1_3	c1_13	c1_37		6	4.04784	0.611943	c1_37	c1_13	c1_13	c1_1		YES										YES																								YES
GNB1	c1_2	c1_5	c1_20	c1_42		4	2.91916	0.837354	c1_42	c1_20	c1_20	c1_1	YES			YES															YES
EEF2	c1_3	c1_11		3	2.23369	1	NA	NA	c1_11	c1_1		YES								YES
PSMA4	c1_3	c1_11	c1_28		5	3.68252	0.709114	NA	NA	c1_11	c1_1		YES								YES																	YES
SPPL3	c1_2	c1_5	c1_19	c1_39		5	3.52486	0.508192	c1_39	c1_39	c1_39	c1_1	YES			YES														YES
DPP6	c1_2	c1_5	c1_27		8	5.76163	0.479126	c1_27	c1_27	c1_27	c1_1	YES			YES																						YES
UFC1	c1_3	c1_9		3	2.41393	1	c1_9	c1_9	c1_9	c1_1		YES						YES
ACP6	c1_3	c1_9		2	1.44449	1	c1_9	c1_9	c1_9	c1_1		YES						YES
NHSL2	c1_2	c1_4	c1_15		4	2.8341	0.666667	c1_15	c1_4	c1_4	c1_1	YES		YES											YES
LOC116184685	c1_3	c1_11	c1_28	c1_44	c1_65	c1_72	c1_75		5	3.48674	0.510955	c1_75	c1_44	c1_11	c1_1		YES								YES																	YES
PFN1	c1_3	c1_11	c1_32		12	9.28855	0.324729	c1_32	c1_32	c1_11	c1_1		YES								YES																					YES
GLIS3	c1_2	c1_5	c1_19	c1_39		3	2.12575	1	c1_39	c1_39	c1_39	c1_1	YES			YES														YES
CDS2	c1_2	c1_4	c1_15		5	3.66582	0.692481	c1_15	c1_4	c1_4	c1_1	YES		YES											YES
BTBD6	c1_3	c1_13	c1_37		5	3.85846	0.602121	c1_37	c1_13	c1_13	c1_1		YES										YES																								YES
KDM6A	c1_2	c1_5	c1_19	c1_39		3	2.40398	1	c1_39	c1_39	c1_39	c1_1	YES			YES														YES
STK38	c1_2		3	2.18433	1	NA	NA	NA	c1_1	YES
LOC110468709	c1_3	c1_11	c1_28	c1_44	c1_65	c1_72	c1_74		4	3.36581	0.837139	c1_74	c1_44	c1_11	c1_1		YES								YES																	YES
OGDHL	c1_3	c1_13	c1_37		14	9.98769	0.261269	c1_37	c1_13	c1_13	c1_1		YES										YES																								YES
MYO6	c1_3	c1_11	c1_28		9	6.89783	0.428877	NA	NA	c1_11	c1_1		YES								YES																	YES
DNM3	c1_2	c1_5	c1_22		6	4.31622	0.59408	c1_22	c1_22	c1_22	c1_1	YES			YES																	YES
DNAJC25	c1_2	c1_5	c1_23		7	4.85275	0.538221	c1_23	c1_23	c1_23	c1_1	YES			YES																		YES
TMEM35B	c1_2	c1_4	c1_14		9	6.51496	0.391108	c1_14	c1_4	c1_4	c1_1	YES		YES										YES
HIBCH	c1_3	c1_11	c1_29	c1_59		5	3.67285	0.710051	c1_59	c1_29	c1_11	c1_1		YES								YES																		YES
DCAF12	c1_3	c1_11	c1_29	c1_59		6	4.25377	0.47838	c1_59	c1_29	c1_11	c1_1		YES								YES																		YES
SEMA3E	c1_3	c1_11	c1_28	c1_44	c1_65	c1_72	c1_75		4	2.68723	0.843636	c1_75	c1_44	c1_11	c1_1		YES								YES																	YES
TCEANC	c1_3	c1_11	c1_28	c1_44	c1_64		7	4.98573	0.533491	c1_64	c1_44	c1_11	c1_1		YES								YES																	YES
LOC110474471	c1_2	c1_4	c1_15		11	7.37761	0.346254	c1_15	c1_4	c1_4	c1_1	YES		YES											YES
DUS1L	c1_2	c1_5	c1_22		3	2.23517	1	c1_22	c1_22	c1_22	c1_1	YES			YES																	YES
KLHL28	c1_2	c1_4	c1_14		8	5.56457	0.442166	c1_14	c1_4	c1_4	c1_1	YES		YES										YES
ZMPSTE24	c1_3	c1_11	c1_28	c1_44	c1_64		4	2.75265	0.841473	c1_64	c1_44	c1_11	c1_1		YES								YES																	YES
CDKL5	c1_2	c1_5	c1_19	c1_39		3	2.30878	1	c1_39	c1_39	c1_39	c1_1	YES			YES														YES
LOC110482923	c1_2	c1_5	c1_25		3	2.19316	1	c1_25	c1_25	c1_25	c1_1	YES			YES																				YES
ATP6V1H	c1_2	c1_4	c1_15	c1_1	c1_2	c1_4	15	11.1342	0.267124	c1_15	c1_4	c1_4	c1_1	YES		YES											YES
ORMDL1	c1_2	c1_5	c1_19	c1_39		3	2.17352	1	c1_39	c1_39	c1_39	c1_1	YES			YES														YES
PPP3CB	c1_2	c1_6		4	2.87055	0.84113	c1_6	c1_6	c1_6	c1_1	YES				YES
RNF126	c1_3	c1_11	c1_29	c1_59		6	4.20948	0.602395	c1_59	c1_29	c1_11	c1_1		YES								YES																		YES
MKNK1	c1_3	c1_11		3	2.07431	1	NA	NA	c1_11	c1_1		YES								YES
MAF1	c1_3	c1_9		4	2.85574	0.832412	c1_9	c1_9	c1_9	c1_1		YES						YES
HTATIP2	c1_3	c1_11	c1_28	c1_44	c1_64		4	2.87168	0.834932	c1_64	c1_44	c1_11	c1_1		YES								YES																	YES
LOC110473958	c1_3	c1_11	c1_29	c1_59		3	2.35467	1	c1_59	c1_29	c1_11	c1_1		YES								YES																		YES
LOC110481222	c1_2	c1_4	c1_15		3	2.07622	1	c1_15	c1_4	c1_4	c1_1	YES		YES											YES
LINGO3	c1_3	c1_11	c1_28	c1_44	c1_64		5	3.56504	0.714677	c1_64	c1_44	c1_11	c1_1		YES								YES																	YES
ALDH1A2	c1_2	c1_5	c1_27		10	7.37344	0.368347	c1_27	c1_27	c1_27	c1_1	YES			YES																						YES
SH3RF3	c1_2	c1_4	c1_14		8	5.62674	0.473175	c1_14	c1_4	c1_4	c1_1	YES		YES										YES
ATP13A3	c1_2	c1_4	c1_14		6	4.35354	0.609074	c1_14	c1_4	c1_4	c1_1	YES		YES										YES
LOC110468166	c1_3	c1_11	c1_28	c1_54		8	5.36268	0.409797	c1_54	c1_54	c1_11	c1_1		YES								YES																	YES
FOS	c1_3	c1_11	c1_28	c1_44	c1_65	c1_72	c1_74		4	2.74959	0.834783	c1_74	c1_44	c1_11	c1_1		YES								YES																	YES
DIRAS2	c1_3	c1_11	c1_28	c1_53		5	3.31618	0.708921	c1_53	c1_53	c1_11	c1_1		YES								YES																	YES
RAMP1	c1_3	c1_11	c1_28	c1_44	c1_64		5	3.70794	0.707759	c1_64	c1_44	c1_11	c1_1		YES								YES																	YES
LOC110483492	c1_3	c1_11	c1_28	c1_44	c1_65	c1_73		5	3.50117	0.712055	c1_73	c1_44	c1_11	c1_1		YES								YES																	YES
AK9	c1_3	c1_11	c1_28	c1_44	c1_64		4	2.87105	0.83704	c1_64	c1_44	c1_11	c1_1		YES								YES																	YES
CAMKMT	c1_2	c1_5	c1_22		6	4.0018	0.61503	c1_22	c1_22	c1_22	c1_1	YES			YES																	YES
UNC5B	c1_2	c1_5	c1_20	c1_43		5	3.47669	0.701144	c1_43	c1_20	c1_20	c1_1	YES			YES															YES
DCXR	c1_3	c1_13	c1_37		3	1.85615	1	c1_37	c1_13	c1_13	c1_1		YES										YES																								YES
ZPR1	c1_3	c1_11	c1_28	c1_44	c1_64		3	2.33526	1	c1_64	c1_44	c1_11	c1_1		YES								YES																	YES
IMMP2L	c1_3	c1_11	c1_29	c1_59		3	1.86519	1	c1_59	c1_29	c1_11	c1_1		YES								YES																		YES
LOC110474342	c1_2	c1_4	c1_15		8	5.7572	0.425947	c1_15	c1_4	c1_4	c1_1	YES		YES											YES
PCBP2	c1_3	c1_11	c1_28	c1_54		5	3.22558	0.708797	c1_54	c1_54	c1_11	c1_1		YES								YES																	YES
ZRANB1	c1_2	c1_4	c1_14		12	7.8381	0.267433	c1_14	c1_4	c1_4	c1_1	YES		YES										YES
ADARB2	c1_2	c1_5	c1_27		6	4.1544	0.59675	c1_27	c1_27	c1_27	c1_1	YES			YES																						YES
ELL	c1_2	c1_5	c1_27		5	3.43693	0.606637	c1_27	c1_27	c1_27	c1_1	YES			YES																						YES
LOC110481923	c1_3	c1_11	c1_28	c1_48		5	3.67873	0.712863	c1_48	c1_48	c1_11	c1_1		YES								YES																	YES
MREG	c1_3	c1_11		4	2.68116	0.846675	NA	NA	c1_11	c1_1		YES								YES
RMDN3	c1_3	c1_11		5	3.86605	0.699342	NA	NA	c1_11	c1_1		YES								YES
HIP1	c1_3	c1_11	c1_29	c1_60	c1_68		9	6.68525	0.419964	c1_68	c1_29	c1_11	c1_1		YES								YES																		YES
LOC116184219	c1_3	c1_11	c1_34		4	2.62901	0.846578	c1_34	c1_34	c1_11	c1_1		YES								YES																							YES
SLC38A9	c1_2	c1_4	c1_15		4	2.67893	0.699102	c1_15	c1_4	c1_4	c1_1	YES		YES											YES
MRPL34	c1_3	c1_9		3	2.16893	1	c1_9	c1_9	c1_9	c1_1		YES						YES
CBFA2T3	c1_2	c1_5	c1_19	c1_40	c1_63		13	8.99786	0.285828	c1_63	c1_40	c1_40	c1_1	YES			YES														YES
MRPL40	c1_3	c1_11	c1_29	c1_59		5	3.40051	0.709571	c1_59	c1_29	c1_11	c1_1		YES								YES																		YES
CEP85	c1_3	c1_11		4	2.59198	0.674357	NA	NA	c1_11	c1_1		YES								YES
NET1	c1_2	c1_4	c1_15		8	5.55835	0.468561	c1_15	c1_4	c1_4	c1_1	YES		YES											YES
CUL2	c1_3	c1_12		8	5.48459	0.468467	c1_12	c1_12	c1_12	c1_1		YES									YES
SMIM12	c1_3	c1_11	c1_28	c1_55		5	3.38322	0.701917	c1_55	c1_55	c1_11	c1_1		YES								YES																	YES
GUCY1A2	c1_3	c1_11	c1_29	c1_59		3	2.34687	1	c1_59	c1_29	c1_11	c1_1		YES								YES																		YES
SRF	c1_3	c1_11	c1_29	c1_59		3	2.13368	1	c1_59	c1_29	c1_11	c1_1		YES								YES																		YES
JAM3	c1_3	c1_11	c1_28		6	3.62141	0.414616	NA	NA	c1_11	c1_1		YES								YES																	YES
TRMT6	c1_2	c1_4	c1_15		4	2.88254	0.840945	c1_15	c1_4	c1_4	c1_1	YES		YES											YES
ADAMTS6	c1_3	c1_11	c1_33		3	2.1267	1	c1_33	c1_33	c1_11	c1_1		YES								YES																						YES
YOD1	c1_2		3	2.13869	1	NA	NA	NA	c1_1	YES
ATP11C	c1_3	c1_13	c1_37		10	7.01476	0.336731	c1_37	c1_13	c1_13	c1_1		YES										YES																								YES
PELO	c1_2	c1_5	c1_20	c1_42		4	2.8822	0.675053	c1_42	c1_20	c1_20	c1_1	YES			YES															YES
RPS6KA3	c1_3	c1_11	c1_29	c1_59		3	2.17241	1	c1_59	c1_29	c1_11	c1_1		YES								YES																		YES
RAB11FIP2	c1_3	c1_13	c1_38		7	5.01031	0.4833	c1_38	c1_13	c1_13	c1_1		YES										YES																									YES
SLC30A1	c1_3	c1_11	c1_28	c1_44	c1_65	c1_72	c1_74		4	2.99449	0.835936	c1_74	c1_44	c1_11	c1_1		YES								YES																	YES
TMEM104	c1_2	c1_4	c1_15		3	2.12317	1	c1_15	c1_4	c1_4	c1_1	YES		YES											YES
PTTG1	c1_3	c1_11	c1_28	c1_44	c1_64		6	4.19264	0.605167	c1_64	c1_44	c1_11	c1_1		YES								YES																	YES
MTM1	c1_2	c1_4	c1_15		5	3.54489	0.600002	c1_15	c1_4	c1_4	c1_1	YES		YES											YES
LOC110475732	c1_2	c1_4	c1_15		7	4.70643	0.530128	c1_15	c1_4	c1_4	c1_1	YES		YES											YES
MAFF	c1_3	c1_11	c1_28	c1_46	c1_66		4	2.96759	0.829759	c1_66	c1_46	c1_11	c1_1		YES								YES																	YES
LOC116183579	c1_3	c1_11	c1_28	c1_52		3	2.26917	1	c1_52	c1_52	c1_11	c1_1		YES								YES																	YES
MBP	c1_2	c1_5	c1_27		7	4.85236	0.498207	c1_27	c1_27	c1_27	c1_1	YES			YES																						YES
PNRC1	c1_3	c1_11	c1_28	c1_44	c1_65	c1_72	c1_75		3	2.0584	1	c1_75	c1_44	c1_11	c1_1		YES								YES																	YES
LOC110479717	c1_2	c1_4	c1_14		3	1.82224	1	c1_14	c1_4	c1_4	c1_1	YES		YES										YES
REXO2	c1_2	c1_4	c1_14		10	7.09817	0.373293	c1_14	c1_4	c1_4	c1_1	YES		YES										YES
FKBP8	c1_2	c1_4	c1_15		5	3.48801	0.710171	c1_15	c1_4	c1_4	c1_1	YES		YES											YES
FMOD	c1_2	c1_5	c1_25		8	5.35253	0.442185	c1_25	c1_25	c1_25	c1_1	YES			YES																				YES
CNOT9	c1_2	c1_4	c1_15		8	5.46631	0.480442	c1_15	c1_4	c1_4	c1_1	YES		YES											YES
RAN	c1_3	c1_11	c1_30		5	3.48337	0.70778	c1_30	c1_30	c1_11	c1_1		YES								YES																			YES
METTL26	c1_2	c1_4	c1_15		4	2.92812	0.825198	c1_15	c1_4	c1_4	c1_1	YES		YES											YES
ATAD2B	c1_3	c1_11	c1_28	c1_44	c1_65	c1_72	c1_74		3	2.37271	1	c1_74	c1_44	c1_11	c1_1		YES								YES																	YES
SELENBP1	c1_2	c1_4	c1_14		4	2.48888	0.852605	c1_14	c1_4	c1_4	c1_1	YES		YES										YES
MLLT1	c1_2	c1_5	c1_25		5	3.30172	0.612465	c1_25	c1_25	c1_25	c1_1	YES			YES																				YES
GOLIM4	c1_2	c1_5	c1_19	c1_39		3	2.22386	1	c1_39	c1_39	c1_39	c1_1	YES			YES														YES
AAMDC	c1_2	c1_4	c1_15		11	7.31088	0.320388	c1_15	c1_4	c1_4	c1_1	YES		YES											YES
SLC35C2	c1_2	c1_5	c1_19	c1_39		4	3.15061	0.836005	c1_39	c1_39	c1_39	c1_1	YES			YES														YES
DDX49	c1_3	c1_11	c1_28	c1_46	c1_66		3	2.05837	1	c1_66	c1_46	c1_11	c1_1		YES								YES																	YES
NDUFA4L2	c1_3	c1_9		5	3.42575	0.420037	c1_9	c1_9	c1_9	c1_1		YES						YES
STX8	c1_2	c1_6		8	5.49257	0.36995	c1_6	c1_6	c1_6	c1_1	YES				YES
HELLS	c1_3	c1_11	c1_28	c1_44	c1_65	c1_73		4	3.03383	0.83771	c1_73	c1_44	c1_11	c1_1		YES								YES																	YES
ANKRD17	c1_2	c1_5	c1_20	c1_41		4	2.87826	0.842326	c1_41	c1_20	c1_20	c1_1	YES			YES															YES
FAM126B	c1_3	c1_11	c1_29	c1_59		3	2.22628	1	c1_59	c1_29	c1_11	c1_1		YES								YES																		YES
FN1	c1_3	c1_11	c1_28	c1_44	c1_64		3	1.94929	0.696841	c1_64	c1_44	c1_11	c1_1		YES								YES																	YES
LOC116183241	c1_2	c1_5	c1_27		5	3.45382	0.407781	c1_27	c1_27	c1_27	c1_1	YES			YES																						YES
TBC1D14	c1_3	c1_11	c1_28	c1_56	c1_56	5	2.90772	0.620669	c1_56	c1_56	c1_11	c1_1		YES								YES																	YES
LOC116183732	c1_3	c1_9		3	2.31314	1	c1_9	c1_9	c1_9	c1_1		YES						YES
LOC110483987	c1_3	c1_11	c1_29	c1_59		6	3.90903	0.48367	c1_59	c1_29	c1_11	c1_1		YES								YES																		YES
FBXW5	c1_3	c1_11	c1_28	c1_55		5	3.24089	0.605924	c1_55	c1_55	c1_11	c1_1		YES								YES																	YES
SV2A	c1_3	c1_11	c1_28	c1_44	c1_64		3	2.13465	1	c1_64	c1_44	c1_11	c1_1		YES								YES																	YES
EIF4G3	c1_3	c1_11	c1_30		10	7.35016	0.388401	c1_30	c1_30	c1_11	c1_1		YES								YES																			YES
SLITRK5	c1_2	c1_5	c1_19	c1_39		4	2.6326	0.674598	c1_39	c1_39	c1_39	c1_1	YES			YES														YES
LAMP3	c1_3	c1_11	c1_31		11	8.2148	0.349702	c1_31	c1_31	c1_11	c1_1		YES								YES																				YES
SLC35A1	c1_2	c1_5	c1_20	c1_43		4	2.53485	0.834523	c1_43	c1_20	c1_20	c1_1	YES			YES															YES
B4GALT4	c1_2	c1_4	c1_15		4	2.80913	0.837637	c1_15	c1_4	c1_4	c1_1	YES		YES											YES
THAP12	c1_3	c1_11	c1_30		5	3.53805	0.702792	c1_30	c1_30	c1_11	c1_1		YES								YES																			YES
HOPX	c1_3	c1_11	c1_29	c1_59		4	2.8062	0.826523	c1_59	c1_29	c1_11	c1_1		YES								YES																		YES
ABHD18	c1_3	c1_11	c1_28		4	2.68115	0.84135	NA	NA	c1_11	c1_1		YES								YES																	YES
GRB14	c1_3	c1_11	c1_28		4	2.87526	0.833148	NA	NA	c1_11	c1_1		YES								YES																	YES
CUL5	c1_3	c1_11	c1_28	c1_44	c1_65	c1_72	c1_74		6	4.08026	0.601215	c1_74	c1_44	c1_11	c1_1		YES								YES																	YES
TOX3	c1_3	c1_11	c1_28	c1_44	c1_65	c1_72	c1_74		6	4.37885	0.603767	c1_74	c1_44	c1_11	c1_1		YES								YES																	YES
FXYD6	c1_2	c1_4	c1_15		8	5.50572	0.443634	c1_15	c1_4	c1_4	c1_1	YES		YES											YES
RHOU	c1_3	c1_11	c1_28	c1_44	c1_64		4	2.89438	0.839883	c1_64	c1_44	c1_11	c1_1		YES								YES																	YES
ATP8B2	c1_3	c1_11		5	3.61842	0.70946	NA	NA	c1_11	c1_1		YES								YES
ENTPD6	c1_2		4	2.911	0.835733	NA	NA	NA	c1_1	YES
CD99	c1_2	c1_4	c1_15		3	2.13488	1	c1_15	c1_4	c1_4	c1_1	YES		YES											YES
SLC35B4	c1_2	c1_5	c1_25		6	4.15006	0.5363	c1_25	c1_25	c1_25	c1_1	YES			YES																				YES
CCDC88C	c1_3	c1_11	c1_28	c1_44	c1_64		3	1.99902	1	c1_64	c1_44	c1_11	c1_1		YES								YES																	YES
PCTP	c1_3	c1_11	c1_28	c1_44	c1_65	c1_73		7	5.20473	0.53834	c1_73	c1_44	c1_11	c1_1		YES								YES																	YES
NPW	c1_3	c1_9		4	2.54231	0.857833	c1_9	c1_9	c1_9	c1_1		YES						YES
WNT10A	c1_3	c1_11	c1_29	c1_59		4	2.81181	0.669971	c1_59	c1_29	c1_11	c1_1		YES								YES																		YES
GRP	c1_2	c1_4	c1_15		8	5.52376	0.436161	c1_15	c1_4	c1_4	c1_1	YES		YES											YES
CASK	c1_2	c1_5	c1_20	c1_41		4	2.80587	0.504622	c1_41	c1_20	c1_20	c1_1	YES			YES															YES
DCBLD1	c1_2	c1_5	c1_27		4	2.71067	0.687917	c1_27	c1_27	c1_27	c1_1	YES			YES																						YES
RBMS1	c1_2	c1_4	c1_14		5	3.56085	0.703167	c1_14	c1_4	c1_4	c1_1	YES		YES										YES
USP5	c1_3	c1_11	c1_28	c1_44	c1_65	c1_73		5	3.68043	0.69605	c1_73	c1_44	c1_11	c1_1		YES								YES																	YES
LOC110478414	c1_2	c1_4	c1_14		4	2.70702	0.841631	c1_14	c1_4	c1_4	c1_1	YES		YES										YES
CHPF	c1_2	c1_4	c1_15		11	7.56331	0.348451	c1_15	c1_4	c1_4	c1_1	YES		YES											YES
BHLHE41	c1_2	c1_5	c1_20	c1_42		3	2.25522	1	c1_42	c1_20	c1_20	c1_1	YES			YES															YES
LOC116183946	c1_3	c1_11	c1_29	c1_60	c1_68		6	4.3252	0.608489	c1_68	c1_29	c1_11	c1_1		YES								YES																		YES
LOC110469310	c1_2	c1_5	c1_21		2	1.25596	1	c1_21	c1_21	c1_21	c1_1	YES			YES																YES
ADAMTSL2	c1_3	c1_11		3	2.00599	1	NA	NA	c1_11	c1_1		YES								YES
GATM	c1_3	c1_11	c1_29	c1_60	c1_68		3	2.23659	1	c1_68	c1_29	c1_11	c1_1		YES								YES																		YES
LOC116183733	c1_2	c1_4	c1_15		7	5.28299	0.524421	c1_15	c1_4	c1_4	c1_1	YES		YES											YES
MEMO1	c1_3	c1_11	c1_28	c1_44	c1_65	c1_72	c1_74		4	2.59634	0.854417	c1_74	c1_44	c1_11	c1_1		YES								YES																	YES
GLUD1	c1_2	c1_5	c1_19	c1_39		7	5.2295	0.524892	c1_39	c1_39	c1_39	c1_1	YES			YES														YES
TTLL7	c1_2	c1_5	c1_19	c1_39		3	2.11362	1	c1_39	c1_39	c1_39	c1_1	YES			YES														YES
CCDC181	c1_3	c1_11	c1_28	c1_44	c1_64		3	2.36926	1	c1_64	c1_44	c1_11	c1_1		YES								YES																	YES
LOC110473340	c1_3	c1_11	c1_33		8	5.39085	0.474864	c1_33	c1_33	c1_11	c1_1		YES								YES																						YES
SIK3	c1_2	c1_4	c1_15		4	2.80136	0.666667	c1_15	c1_4	c1_4	c1_1	YES		YES											YES
SKA3	c1_2	c1_4	c1_15		3	2.18195	1	c1_15	c1_4	c1_4	c1_1	YES		YES											YES
LOC110472823	c1_2	c1_4	c1_15		5	3.06847	0.716575	c1_15	c1_4	c1_4	c1_1	YES		YES											YES
PLEKHG1	c1_3	c1_11	c1_31		6	4.15797	0.605131	c1_31	c1_31	c1_11	c1_1		YES								YES																				YES
PPM1L	c1_3	c1_13	c1_38		12	8.8735	0.313992	c1_38	c1_13	c1_13	c1_1		YES										YES																									YES
GDPD5	c1_3	c1_11	c1_28	c1_46	c1_66		5	3.29147	0.620774	c1_66	c1_46	c1_11	c1_1		YES								YES																	YES
LOC110483618	c1_2	c1_5	c1_20	c1_41		5	3.68582	0.696247	c1_41	c1_20	c1_20	c1_1	YES			YES															YES
CDR2L	c1_3	c1_11	c1_29	c1_61		3	2.17222	1	c1_61	c1_29	c1_11	c1_1		YES								YES																		YES
AP3M1	c1_3	c1_11	c1_28	c1_44	c1_64		6	3.78866	0.547401	c1_64	c1_44	c1_11	c1_1		YES								YES																	YES
PI4KA	c1_2	c1_4	c1_15		7	4.23799	0.397213	c1_15	c1_4	c1_4	c1_1	YES		YES											YES
LOC110483166	c1_3	c1_9		5	3.77429	0.701014	c1_9	c1_9	c1_9	c1_1		YES						YES
CBARP	c1_3	c1_11	c1_28		3	2.02476	1	NA	NA	c1_11	c1_1		YES								YES																	YES
HELZ	c1_3	c1_11	c1_28		3	2.21788	1	NA	NA	c1_11	c1_1		YES								YES																	YES
NTNG2	c1_3	c1_11	c1_28		5	3.36025	0.62186	NA	NA	c1_11	c1_1		YES								YES																	YES
ZDHHC7	c1_3	c1_11	c1_28		3	2.30331	1	NA	NA	c1_11	c1_1		YES								YES																	YES
RGS17	c1_3	c1_13	c1_38		4	2.69148	0.842664	c1_38	c1_13	c1_13	c1_1		YES										YES																									YES
LOC110471217	c1_3	c1_11	c1_29	c1_60	c1_68		5	3.62577	0.602197	c1_68	c1_29	c1_11	c1_1		YES								YES																		YES
SGTB	c1_3	c1_13	c1_37		7	5.25864	0.522184	c1_37	c1_13	c1_13	c1_1		YES										YES																								YES
LOC110472734	c1_2	c1_4	c1_15		9	5.9501	0.425124	c1_15	c1_4	c1_4	c1_1	YES		YES											YES
PDE10A	c1_3	c1_11	c1_28	c1_44	c1_65	c1_72	c1_75		4	3.09477	0.838833	c1_75	c1_44	c1_11	c1_1		YES								YES																	YES
SCNN1G	c1_2	c1_4	c1_15		6	3.82415	0.561959	c1_15	c1_4	c1_4	c1_1	YES		YES											YES
RAB30	c1_3	c1_11	c1_28	c1_44	c1_65	c1_73		4	2.70323	0.844212	c1_73	c1_44	c1_11	c1_1		YES								YES																	YES
JCAD	c1_3	c1_11	c1_28	c1_44	c1_64		5	3.69332	0.701757	c1_64	c1_44	c1_11	c1_1		YES								YES																	YES
CCDC80	c1_3	c1_11	c1_32		4	2.74467	0.68205	c1_32	c1_32	c1_11	c1_1		YES								YES																					YES
RNF212B	c1_2	c1_5	c1_22		3	2.00451	1	c1_22	c1_22	c1_22	c1_1	YES			YES																	YES
ARMH4	c1_2	c1_4	c1_14		11	8.16103	0.332524	c1_14	c1_4	c1_4	c1_1	YES		YES										YES
SEC24B	c1_3	c1_11	c1_28	c1_48		3	2.14095	1	c1_48	c1_48	c1_11	c1_1		YES								YES																	YES
CABIN1	c1_2	c1_4	c1_15		6	4.34366	0.607908	c1_15	c1_4	c1_4	c1_1	YES		YES											YES
HECW2	c1_3	c1_12		4	2.70065	0.832544	c1_12	c1_12	c1_12	c1_1		YES									YES
TYRO3	c1_3	c1_11	c1_28	c1_44	c1_65	c1_73		10	7.64112	0.363861	c1_73	c1_44	c1_11	c1_1		YES								YES																	YES
LPL	c1_2	c1_5	c1_22		4	2.82102	0.828071	c1_22	c1_22	c1_22	c1_1	YES			YES																	YES
RFC1	c1_3	c1_11	c1_28	c1_44	c1_64		3	2.11366	1	c1_64	c1_44	c1_11	c1_1		YES								YES																	YES
ANKRD46	c1_3	c1_11	c1_28	c1_46	c1_66		5	3.48237	0.628412	c1_66	c1_46	c1_11	c1_1		YES								YES																	YES
PDPR	c1_3		4	2.57744	0.832803	NA	NA	NA	c1_1		YES
TRIM14	c1_2	c1_4	c1_15		8	5.34918	0.476951	c1_15	c1_4	c1_4	c1_1	YES		YES											YES
KCNN2	c1_2	c1_5	c1_25		3	2.20085	1	c1_25	c1_25	c1_25	c1_1	YES			YES																				YES
CDC40	c1_3	c1_11	c1_28	c1_58		4	2.78083	0.836734	c1_58	c1_58	c1_11	c1_1		YES								YES																	YES
FER	c1_3	c1_11		4	2.6646	0.832407	NA	NA	c1_11	c1_1		YES								YES
RPH3A	c1_3	c1_13	c1_37		2	1.34013	1	c1_37	c1_13	c1_13	c1_1		YES										YES																								YES
LOC110484351	c1_3	c1_9		6	4.20013	0.553994	c1_9	c1_9	c1_9	c1_1		YES						YES
FGF14	c1_3	c1_13	c1_37		12	8.15178	0.293787	c1_37	c1_13	c1_13	c1_1		YES										YES																								YES
BACE2	c1_3	c1_11	c1_30		6	4.21087	0.60061	c1_30	c1_30	c1_11	c1_1		YES								YES																			YES
RASGEF1A	c1_3	c1_11	c1_34		4	2.71845	0.846542	c1_34	c1_34	c1_11	c1_1		YES								YES																							YES
TMEM269	c1_2	c1_4	c1_15		7	4.97893	0.448743	c1_15	c1_4	c1_4	c1_1	YES		YES											YES
HSPB8	c1_3	c1_11	c1_32		6	4.05624	0.612199	c1_32	c1_32	c1_11	c1_1		YES								YES																					YES
LONP1	c1_3	c1_11	c1_28		5	3.32364	0.719873	NA	NA	c1_11	c1_1		YES								YES																	YES
ADPRS	c1_2	c1_4	c1_15		6	3.90561	0.542384	c1_15	c1_4	c1_4	c1_1	YES		YES											YES
OGFR	c1_3	c1_11	c1_28		3	2.07609	1	NA	NA	c1_11	c1_1		YES								YES																	YES
ING5	c1_3	c1_11	c1_28	c1_44	c1_64		4	3.03513	0.83692	c1_64	c1_44	c1_11	c1_1		YES								YES																	YES
LOC110484437	c1_3	c1_11	c1_28	c1_44	c1_64		3	1.99998	1	c1_64	c1_44	c1_11	c1_1		YES								YES																	YES
SNX1	c1_2	c1_5	c1_20	c1_42		4	2.70677	0.51526	c1_42	c1_20	c1_20	c1_1	YES			YES															YES
FABP7	c1_3	c1_11	c1_28	c1_44	c1_65	c1_72	c1_74		9	6.63185	0.43529	c1_74	c1_44	c1_11	c1_1		YES								YES																	YES
SCLT1	c1_3	c1_13	c1_37		4	2.73659	0.843409	c1_37	c1_13	c1_13	c1_1		YES										YES																								YES
GSG1L	c1_3	c1_11	c1_28	c1_44	c1_65	c1_72	c1_75		4	2.83796	0.834008	c1_75	c1_44	c1_11	c1_1		YES								YES																	YES
RNF144A	c1_2	c1_5	c1_25		9	6.12283	0.403488	c1_25	c1_25	c1_25	c1_1	YES			YES																				YES
TMEM41A	c1_2	c1_4	c1_14		3	2.0865	1	c1_14	c1_4	c1_4	c1_1	YES		YES										YES
MPHOSPH6	c1_3	c1_11	c1_28	c1_46	c1_66		3	2.09163	1	c1_66	c1_46	c1_11	c1_1		YES								YES																	YES
SMAD7	c1_2	c1_5	c1_20	c1_43		7	4.72967	0.492998	c1_43	c1_20	c1_20	c1_1	YES			YES															YES
IGFBP2	c1_2	c1_5	c1_19	c1_39		5	3.68123	0.514867	c1_39	c1_39	c1_39	c1_1	YES			YES														YES
SKOR1	c1_2	c1_4	c1_15		10	7.08021	0.393773	c1_15	c1_4	c1_4	c1_1	YES		YES											YES
ELAC2	c1_2	c1_5	c1_25		5	3.50941	0.607113	c1_25	c1_25	c1_25	c1_1	YES			YES																				YES
TOMM34	c1_2	c1_5	c1_20	c1_42		4	2.95614	0.828143	c1_42	c1_20	c1_20	c1_1	YES			YES															YES
MNT	c1_3	c1_11	c1_28	c1_44	c1_64		6	4.58495	0.606505	c1_64	c1_44	c1_11	c1_1		YES								YES																	YES
SMYD5	c1_2	c1_7		4	2.93039	0.678491	c1_7	c1_7	c1_7	c1_1	YES					YES
ZBTB42	c1_3	c1_11	c1_28	c1_44	c1_65	c1_72	c1_74		3	2.24199	1	c1_74	c1_44	c1_11	c1_1		YES								YES																	YES
LOC110478960	c1_3	c1_13	c1_37		3	2.18075	1	c1_37	c1_13	c1_13	c1_1		YES										YES																								YES
PKNOX1	c1_2	c1_4	c1_14		4	2.61336	0.680234	c1_14	c1_4	c1_4	c1_1	YES		YES										YES
LSM7	c1_3	c1_11	c1_33		4	2.68454	0.83471	c1_33	c1_33	c1_11	c1_1		YES								YES																						YES
S100B	c1_2	c1_5	c1_22		4	2.92417	0.834948	c1_22	c1_22	c1_22	c1_1	YES			YES																	YES
SOX6	c1_2	c1_5	c1_20	c1_42		7	5.0214	0.545057	c1_42	c1_20	c1_20	c1_1	YES			YES															YES
CCND3	c1_3	c1_11	c1_28	c1_47		4	2.87068	0.832629	c1_47	c1_47	c1_11	c1_1		YES								YES																	YES
CLN5	c1_2	c1_4	c1_16		3	2.23021	1	c1_16	c1_4	c1_4	c1_1	YES		YES												YES
PDIA5	c1_2	c1_5	c1_23		4	2.5459	0.690317	c1_23	c1_23	c1_23	c1_1	YES			YES																		YES
ADD1	c1_3	c1_11	c1_28	c1_44	c1_64		5	3.71471	0.704862	c1_64	c1_44	c1_11	c1_1		YES								YES																	YES
NOX4	c1_2	c1_5		3	1.96033	0.308312	NA	NA	NA	c1_1	YES			YES
MAP2K2	c1_3	c1_11		4	2.68791	0.835998	NA	NA	c1_11	c1_1		YES								YES
TTC26	c1_3	c1_11	c1_28	c1_44	c1_64		3	1.94165	1	c1_64	c1_44	c1_11	c1_1		YES								YES																	YES
SNAPC2	c1_2	c1_4	c1_14		6	4.03792	0.534629	c1_14	c1_4	c1_4	c1_1	YES		YES										YES
SCRN3	c1_3	c1_11	c1_29	c1_59		5	3.65361	0.695483	c1_59	c1_29	c1_11	c1_1		YES								YES																		YES
TADA1	c1_3	c1_11	c1_29	c1_60	c1_68		4	2.69039	0.85166	c1_68	c1_29	c1_11	c1_1		YES								YES																		YES
NID1	c1_3	c1_11	c1_28	c1_44	c1_65	c1_72	c1_74		3	1.82875	1	c1_74	c1_44	c1_11	c1_1		YES								YES																	YES
RNPEP	c1_2	c1_4	c1_15		3	2.01507	1	c1_15	c1_4	c1_4	c1_1	YES		YES											YES
LOC110483999	c1_2	c1_5	c1_25		2	1.29716	1	c1_25	c1_25	c1_25	c1_1	YES			YES																				YES
LOC110471218	c1_3	c1_11	c1_29	c1_59		7	5.12187	0.532587	c1_59	c1_29	c1_11	c1_1		YES								YES																		YES
HBS1L	c1_3	c1_11	c1_28	c1_44	c1_65	c1_72	c1_74		5	3.78288	0.695985	c1_74	c1_44	c1_11	c1_1		YES								YES																	YES
REV1	c1_2		3	2.13389	1	NA	NA	NA	c1_1	YES
LOC116184803	c1_3	c1_11	c1_28	c1_44	c1_65	c1_73		3	2.15541	1	c1_73	c1_44	c1_11	c1_1		YES								YES																	YES
ACOT9	c1_2		4	2.8921	0.833967	NA	NA	NA	c1_1	YES
KCNC2	c1_3	c1_13	c1_38		2	1.45595	1	c1_38	c1_13	c1_13	c1_1		YES										YES																									YES
CHRD	c1_2	c1_4	c1_15		7	5.17358	0.526516	c1_15	c1_4	c1_4	c1_1	YES		YES											YES
ATG4C	c1_3	c1_11	c1_28	c1_44	c1_64		3	2.0573	1	c1_64	c1_44	c1_11	c1_1		YES								YES																	YES
KCNJ6	c1_2	c1_5	c1_19	c1_40	c1_63		5	3.52294	0.699428	c1_63	c1_40	c1_40	c1_1	YES			YES														YES
STX5	c1_3	c1_11	c1_28	c1_44	c1_65	c1_73		5	3.55814	0.70856	c1_73	c1_44	c1_11	c1_1		YES								YES																	YES
MIPEP	c1_3	c1_11	c1_29	c1_61		3	2.26067	1	c1_61	c1_29	c1_11	c1_1		YES								YES																		YES
UVSSA	c1_3	c1_11	c1_28		3	1.87274	1	NA	NA	c1_11	c1_1		YES								YES																	YES
ATG13	c1_2	c1_5	c1_25		6	4.81784	0.466954	c1_25	c1_25	c1_25	c1_1	YES			YES																				YES
LOC110484254	c1_3	c1_9		3	2.131	1	c1_9	c1_9	c1_9	c1_1		YES						YES
LOC110470957	c1_3	c1_11	c1_28	c1_46	c1_66		7	4.7785	0.53508	c1_66	c1_46	c1_11	c1_1		YES								YES																	YES
NIP7	c1_3	c1_11	c1_29	c1_59		3	2.14822	1	c1_59	c1_29	c1_11	c1_1		YES								YES																		YES
AMZ1	c1_3	c1_11	c1_29	c1_60	c1_68		3	2.05943	1	c1_68	c1_29	c1_11	c1_1		YES								YES																		YES
RAI2	c1_2	c1_5	c1_22		5	3.50959	0.597288	c1_22	c1_22	c1_22	c1_1	YES			YES																	YES
FIGN	c1_3	c1_11	c1_28	c1_56		7	4.39151	0.536405	c1_56	c1_56	c1_11	c1_1		YES								YES																	YES
C18H17orf58	c1_2	c1_4	c1_15		4	2.91219	0.831574	c1_15	c1_4	c1_4	c1_1	YES		YES											YES
PGBD5	c1_3	c1_11	c1_28	c1_44	c1_65	c1_73		3	2.07621	0.341962	c1_73	c1_44	c1_11	c1_1		YES								YES																	YES
LOC110473846	c1_2	c1_4	c1_15		5	3.48036	0.499182	c1_15	c1_4	c1_4	c1_1	YES		YES											YES
ENKD1	c1_2	c1_4	c1_14		6	4.27263	0.603115	c1_14	c1_4	c1_4	c1_1	YES		YES										YES
MAP6	c1_2	c1_5	c1_25		3	1.88275	1	c1_25	c1_25	c1_25	c1_1	YES			YES																				YES
FAF1	c1_2	c1_5	c1_22		3	2.13935	1	c1_22	c1_22	c1_22	c1_1	YES			YES																	YES
SELENOO	c1_3	c1_13	c1_38		4	2.70242	0.839424	c1_38	c1_13	c1_13	c1_1		YES										YES																									YES
LAPTM4A	c1_2	c1_5	c1_20	c1_43		7	4.63243	0.532981	c1_43	c1_20	c1_20	c1_1	YES			YES															YES
ATP13A2	c1_2	c1_4	c1_14		4	2.68785	0.825675	c1_14	c1_4	c1_4	c1_1	YES		YES										YES
WDR43	c1_3	c1_11	c1_28	c1_44	c1_65	c1_73		3	2.22064	1	c1_73	c1_44	c1_11	c1_1		YES								YES																	YES
DNAJC6	c1_3	c1_13	c1_37		5	3.46831	0.5	c1_37	c1_13	c1_13	c1_1		YES										YES																								YES
CPNE4	c1_2	c1_5	c1_19	c1_39		3	2.25785	1	c1_39	c1_39	c1_39	c1_1	YES			YES														YES
RALGPS1	c1_3	c1_11	c1_28		3	2.06428	1	NA	NA	c1_11	c1_1		YES								YES																	YES
OCLN	c1_3	c1_11	c1_32		3	1.99128	1	c1_32	c1_32	c1_11	c1_1		YES								YES																					YES
METTL27	c1_2	c1_5	c1_25		7	5.26056	0.486337	c1_25	c1_25	c1_25	c1_1	YES			YES																				YES
DNAJC5G	c1_2	c1_4	c1_14		3	2.07358	1	c1_14	c1_4	c1_4	c1_1	YES		YES										YES
TRERF1	c1_3	c1_13	c1_37		4	2.73971	0.845155	c1_37	c1_13	c1_13	c1_1		YES										YES																								YES
HPS1	c1_2	c1_4	c1_14		3	2.07906	1	c1_14	c1_4	c1_4	c1_1	YES		YES										YES
LOC110469696	c1_3	c1_13	c1_37		4	2.61838	0.837774	c1_37	c1_13	c1_13	c1_1		YES										YES																								YES
COL4A2	c1_2	c1_5	c1_20	c1_42		3	2.23192	1	c1_42	c1_20	c1_20	c1_1	YES			YES															YES
XYLT2	c1_3	c1_11	c1_29	c1_61		4	2.6122	0.838655	c1_61	c1_29	c1_11	c1_1		YES								YES																		YES
TEX55	c1_2	c1_4	c1_15		3	2.01741	1	c1_15	c1_4	c1_4	c1_1	YES		YES											YES
LOC110470226	c1_3	c1_11	c1_29		3	1.89887	1	NA	c1_29	c1_11	c1_1		YES								YES																		YES
LOC110481782	c1_3	c1_9		7	5.02818	0.542314	c1_9	c1_9	c1_9	c1_1		YES						YES
MGAT3	c1_2	c1_5	c1_25		3	2.20568	1	c1_25	c1_25	c1_25	c1_1	YES			YES																				YES
SSBP3	c1_2	c1_5	c1_20	c1_41		3	2.08059	1	c1_41	c1_20	c1_20	c1_1	YES			YES															YES
LIPG	c1_3	c1_11	c1_29		3	1.81781	1	NA	c1_29	c1_11	c1_1		YES								YES																		YES
LOC110470021	c1_3	c1_9		5	3.61089	0.702171	c1_9	c1_9	c1_9	c1_1		YES						YES
MYSM1	c1_3	c1_12		4	2.70154	0.83451	c1_12	c1_12	c1_12	c1_1		YES									YES
ZNRF3	c1_3	c1_13	c1_38		7	4.57644	0.490357	c1_38	c1_13	c1_13	c1_1		YES										YES																									YES
SPOPL	c1_2	c1_5	c1_20	c1_42		3	1.96053	1	c1_42	c1_20	c1_20	c1_1	YES			YES															YES
PTBP2	c1_3	c1_11	c1_28	c1_58		5	3.32636	0.706878	c1_58	c1_58	c1_11	c1_1		YES								YES																	YES
LOC110485075	c1_2	c1_5	c1_26		4	2.53763	0.472015	c1_26	c1_26	c1_26	c1_1	YES			YES																					YES
CLPTM1L	c1_3	c1_12		6	3.93728	0.486041	c1_12	c1_12	c1_12	c1_1		YES									YES
PROM1	c1_3	c1_11	c1_29	c1_60	c1_68		7	5.0057	0.435591	c1_68	c1_29	c1_11	c1_1		YES								YES																		YES
LOC110467545	c1_3	c1_11	c1_29	c1_61		6	4.15631	0.611619	c1_61	c1_29	c1_11	c1_1		YES								YES																		YES
FAM20B	c1_3	c1_9		3	2.05606	0.650492	c1_9	c1_9	c1_9	c1_1		YES						YES
LOC110474874	c1_2	c1_5	c1_25		9	5.85599	0.401747	c1_25	c1_25	c1_25	c1_1	YES			YES																				YES
DCAF10	c1_2	c1_5	c1_25		8	4.7559	0.407757	c1_25	c1_25	c1_25	c1_1	YES			YES																				YES
LOC110476808	c1_2	c1_4	c1_14		3	1.81416	1	c1_14	c1_4	c1_4	c1_1	YES		YES										YES
LOC116183862	c1_3		3	1.92592	1	NA	NA	NA	c1_1		YES
TRIP12	c1_3	c1_11	c1_28	c1_44	c1_64		3	2.15128	1	c1_64	c1_44	c1_11	c1_1		YES								YES																	YES
ERP29	c1_3	c1_11	c1_31		3	1.94394	1	c1_31	c1_31	c1_11	c1_1		YES								YES																				YES
BRPF3	c1_2	c1_5	c1_19	c1_39		4	2.63671	0.531502	c1_39	c1_39	c1_39	c1_1	YES			YES														YES
TMEM203	c1_2	c1_4	c1_15		4	2.63648	0.829169	c1_15	c1_4	c1_4	c1_1	YES		YES											YES
LOC110473067	c1_2	c1_5	c1_20	c1_41		3	2.18595	1	c1_41	c1_20	c1_20	c1_1	YES			YES															YES
PHTF2	c1_3	c1_11	c1_29	c1_59		8	5.69258	0.474579	c1_59	c1_29	c1_11	c1_1		YES								YES																		YES
ATP8A2	c1_2	c1_5	c1_20	c1_42		3	2.23621	1	c1_42	c1_20	c1_20	c1_1	YES			YES															YES
WDR44	c1_3	c1_11	c1_28	c1_58		6	3.86811	0.551695	c1_58	c1_58	c1_11	c1_1		YES								YES																	YES
ANXA4	c1_2	c1_5	c1_20	c1_43		3	2.12373	1	c1_43	c1_20	c1_20	c1_1	YES			YES															YES
IDH2	c1_3	c1_11	c1_28	c1_49		4	2.90932	0.832193	c1_49	c1_49	c1_11	c1_1		YES								YES																	YES
COLEC11	c1_2	c1_4		5	3.25395	0.518144	NA	c1_4	c1_4	c1_1	YES		YES
COL25A1	c1_2	c1_4	c1_14		6	3.89134	0.387979	c1_14	c1_4	c1_4	c1_1	YES		YES										YES
OSBPL2	c1_3	c1_11	c1_28	c1_46	c1_66		3	2.00478	1	c1_66	c1_46	c1_11	c1_1		YES								YES																	YES
CREG1	c1_3	c1_11	c1_28	c1_44	c1_64		3	1.95464	1	c1_64	c1_44	c1_11	c1_1		YES								YES																	YES
AMOT	c1_2		3	1.90154	1	NA	NA	NA	c1_1	YES
RAB11FIP5	c1_3	c1_11	c1_29	c1_60	c1_68		6	4.31757	0.604034	c1_68	c1_29	c1_11	c1_1		YES								YES																		YES
PRKAB2	c1_2	c1_4	c1_15		3	1.86053	1	c1_15	c1_4	c1_4	c1_1	YES		YES											YES
RTKN2	c1_2	c1_5	c1_25		7	4.68107	0.434366	c1_25	c1_25	c1_25	c1_1	YES			YES																				YES
C29H12orf10	c1_2	c1_4	c1_17		3	2.0178	1	c1_17	c1_4	c1_4	c1_1	YES		YES													YES
GRIP1	c1_3	c1_11	c1_28	c1_58		3	1.96979	1	c1_58	c1_58	c1_11	c1_1		YES								YES																	YES
FNTA	c1_2	c1_4	c1_15		2	1.2484	1	c1_15	c1_4	c1_4	c1_1	YES		YES											YES
LOC110473382	c1_3	c1_13	c1_38		7	4.36926	0.495888	c1_38	c1_13	c1_13	c1_1		YES										YES																									YES
CAP2	c1_3	c1_11	c1_28	c1_44	c1_64		6	3.94301	0.605191	c1_64	c1_44	c1_11	c1_1		YES								YES																	YES
C9orf72	c1_3	c1_11		3	2.02842	1	NA	NA	c1_11	c1_1		YES								YES
ZER1	c1_3	c1_11	c1_35	c1_35	3	1.93792	0.666659	c1_35	c1_35	c1_11	c1_1		YES								YES																								YES
SGMS2	c1_3	c1_11	c1_28		3	2.03103	1	NA	NA	c1_11	c1_1		YES								YES																	YES
OPRL1	c1_2	c1_5	c1_19	c1_39		6	3.5515	0.264616	c1_39	c1_39	c1_39	c1_1	YES			YES														YES
TMEM47	c1_2	c1_5	c1_20	c1_42		4	2.52245	0.83706	c1_42	c1_20	c1_20	c1_1	YES			YES															YES
CCNK	c1_2	c1_5	c1_26		6	4.07479	0.533189	c1_26	c1_26	c1_26	c1_1	YES			YES																					YES
CAMKV	c1_2	c1_4	c1_15		5	3.42452	0.705777	c1_15	c1_4	c1_4	c1_1	YES		YES											YES
EEFSEC	c1_2	c1_4	c1_15		9	5.79588	0.397585	c1_15	c1_4	c1_4	c1_1	YES		YES											YES
RPRD1B	c1_3	c1_13	c1_38		4	2.54698	0.843368	c1_38	c1_13	c1_13	c1_1		YES										YES																									YES
VEZF1	c1_3	c1_11	c1_28	c1_44	c1_65	c1_72	c1_74		6	4.19171	0.554741	c1_74	c1_44	c1_11	c1_1		YES								YES																	YES
GPLD1	c1_3	c1_11	c1_34		4	2.6424	0.846581	c1_34	c1_34	c1_11	c1_1		YES								YES																							YES
TEPSIN	c1_3	c1_11	c1_29		4	2.4537	0.834827	NA	c1_29	c1_11	c1_1		YES								YES																		YES
LCP1	c1_3	c1_11	c1_29	c1_60		8	5.10274	0.407492	NA	c1_29	c1_11	c1_1		YES								YES																		YES
SLC25A19	c1_3	c1_13	c1_37		3	1.97667	1	c1_37	c1_13	c1_13	c1_1		YES										YES																								YES
INTU	c1_2	c1_4	c1_14		5	3.34466	0.617858	c1_14	c1_4	c1_4	c1_1	YES		YES										YES
MRPS7	c1_2	c1_5	c1_19	c1_39		6	3.88819	0.61	c1_39	c1_39	c1_39	c1_1	YES			YES														YES
ARHGEF5	c1_2	c1_4	c1_15		3	2.02306	1	c1_15	c1_4	c1_4	c1_1	YES		YES											YES
LOC110474989	c1_2	c1_4	c1_16		4	3.05614	0.832746	c1_16	c1_4	c1_4	c1_1	YES		YES												YES
TUSC1	c1_2	c1_5	c1_19	c1_40	c1_63		3	1.8966	1	c1_63	c1_40	c1_40	c1_1	YES			YES														YES
PHGDH	c1_2	c1_5	c1_23		5	3.42879	0.71171	c1_23	c1_23	c1_23	c1_1	YES			YES																		YES
SLC35A4	c1_3	c1_11	c1_28	c1_44	c1_64		5	3.1329	0.711378	c1_64	c1_44	c1_11	c1_1		YES								YES																	YES
SEMA3A	c1_3	c1_11	c1_29	c1_60	c1_68		4	2.77652	0.834471	c1_68	c1_29	c1_11	c1_1		YES								YES																		YES
OAF	c1_2	c1_5	c1_19	c1_40	c1_62	c1_70		3	2.03522	1	c1_70	c1_40	c1_40	c1_1	YES			YES														YES
AKAP5	c1_3	c1_11	c1_28	c1_44	c1_64	c1_1	c1_3	c1_11	15	11.2071	0.242976	c1_64	c1_44	c1_11	c1_1		YES								YES																	YES
HUNK	c1_2	c1_5	c1_19	c1_39		4	2.59594	0.534665	c1_39	c1_39	c1_39	c1_1	YES			YES														YES
ZC3H12A	c1_2	c1_5	c1_25		4	2.60375	0.837928	c1_25	c1_25	c1_25	c1_1	YES			YES																				YES
FLII	c1_2	c1_4	c1_18		5	2.97834	0.403135	c1_18	c1_4	c1_4	c1_1	YES		YES														YES
ADAM23	c1_2	c1_5	c1_27		4	2.67973	0.837228	c1_27	c1_27	c1_27	c1_1	YES			YES																						YES
SYVN1	c1_2	c1_4	c1_15		5	3.52049	0.606496	c1_15	c1_4	c1_4	c1_1	YES		YES											YES
LOC110483807	c1_3	c1_11	c1_29	c1_59		3	2.03166	1	c1_59	c1_29	c1_11	c1_1		YES								YES																		YES
UROD	c1_3	c1_11	c1_28	c1_44	c1_64		3	2.04875	1	c1_64	c1_44	c1_11	c1_1		YES								YES																	YES
SIX3	c1_3	c1_11	c1_28	c1_44	c1_65	c1_73		5	3.41207	0.50866	c1_73	c1_44	c1_11	c1_1		YES								YES																	YES
CZH5orf63	c1_2	c1_4	c1_15		7	4.56542	0.394306	c1_15	c1_4	c1_4	c1_1	YES		YES											YES
GAS7	c1_2	c1_4	c1_15		3	1.77623	1	c1_15	c1_4	c1_4	c1_1	YES		YES											YES
AKAP12	c1_2	c1_5	c1_26		3	1.8378	1	c1_26	c1_26	c1_26	c1_1	YES			YES																					YES
WNK2	c1_3		5	2.96252	0.527835	NA	NA	NA	c1_1		YES
LOC110481943	c1_2	c1_5	c1_26		12	7.56125	0.260067	c1_26	c1_26	c1_26	c1_1	YES			YES																					YES
SHLD3	c1_3	c1_9		6	3.85842	0.483955	c1_9	c1_9	c1_9	c1_1		YES						YES
TDG	c1_3	c1_11	c1_28	c1_44	c1_65	c1_73		5	3.71132	0.708194	c1_73	c1_44	c1_11	c1_1		YES								YES																	YES
LOC110483403	c1_2	c1_4	c1_14		3	2.06419	1	c1_14	c1_4	c1_4	c1_1	YES		YES										YES
SNX13	c1_2	c1_5	c1_19	c1_39		3	2.3171	1	c1_39	c1_39	c1_39	c1_1	YES			YES														YES
TIMM44	c1_2	c1_5	c1_19	c1_40	c1_63		4	2.55464	0.83155	c1_63	c1_40	c1_40	c1_1	YES			YES														YES
GAP43	c1_3	c1_11	c1_29	c1_59		3	2.0269	1	c1_59	c1_29	c1_11	c1_1		YES								YES																		YES
SNRPE	c1_3	c1_9		3	1.97603	1	c1_9	c1_9	c1_9	c1_1		YES						YES
EPN3	c1_3	c1_11	c1_31		4	2.65439	0.849188	c1_31	c1_31	c1_11	c1_1		YES								YES																				YES
LOC110480138	c1_3	c1_11	c1_28	c1_44	c1_64		3	2.12145	1	c1_64	c1_44	c1_11	c1_1		YES								YES																	YES
SELENOW	c1_3	c1_11	c1_28	c1_46	c1_66		3	2.12896	1	c1_66	c1_46	c1_11	c1_1		YES								YES																	YES
SPON1	c1_2	c1_5	c1_19	c1_39		4	3.0235	0.833938	c1_39	c1_39	c1_39	c1_1	YES			YES														YES
SLC32A1	c1_2	c1_5	c1_22		4	2.58264	0.834879	c1_22	c1_22	c1_22	c1_1	YES			YES																	YES
APOA1	c1_3	c1_9		3	1.90249	1	c1_9	c1_9	c1_9	c1_1		YES						YES
TLN1	c1_3	c1_13	c1_37		3	1.85706	1	c1_37	c1_13	c1_13	c1_1		YES										YES																								YES
LOC110467633	c1_3	c1_11	c1_29	c1_59		3	1.99018	1	c1_59	c1_29	c1_11	c1_1		YES								YES																		YES
GPN3	c1_3	c1_11	c1_28		5	3.38107	0.701302	NA	NA	c1_11	c1_1		YES								YES																	YES
PIH1D1	c1_2	c1_4	c1_17		4	2.41429	0.855042	c1_17	c1_4	c1_4	c1_1	YES		YES													YES
NCBP3	c1_3	c1_13	c1_38		7	5.14505	0.536315	c1_38	c1_13	c1_13	c1_1		YES										YES																									YES
LOC110475846	c1_2	c1_4	c1_15		5	3.36515	0.703881	c1_15	c1_4	c1_4	c1_1	YES		YES											YES
NRARP	c1_3	c1_11	c1_28		3	1.8379	1	NA	NA	c1_11	c1_1		YES								YES																	YES
NMNAT2	c1_2	c1_4	c1_14		3	2.0403	1	c1_14	c1_4	c1_4	c1_1	YES		YES										YES
NCKAP5	c1_3	c1_11	c1_31		4	2.75635	0.838793	c1_31	c1_31	c1_11	c1_1		YES								YES																				YES
PLAC9	c1_2	c1_4	c1_15		3	2.26958	1	c1_15	c1_4	c1_4	c1_1	YES		YES											YES
ZNF830	c1_3	c1_11	c1_28	c1_44	c1_65	c1_72	c1_74		6	4.41508	0.610746	c1_74	c1_44	c1_11	c1_1		YES								YES																	YES
ECRG4	c1_3	c1_9		5	3.21243	0.391714	c1_9	c1_9	c1_9	c1_1		YES						YES
SARNP	c1_3	c1_11	c1_31		3	1.89588	1	c1_31	c1_31	c1_11	c1_1		YES								YES																				YES
LOC110480656	c1_2	c1_4	c1_15		8	5.43875	0.469744	c1_15	c1_4	c1_4	c1_1	YES		YES											YES
CCDC84	c1_2	c1_4	c1_15		5	3.6488	0.709078	c1_15	c1_4	c1_4	c1_1	YES		YES											YES
BMT2	c1_2	c1_5	c1_22		3	2.20975	1	c1_22	c1_22	c1_22	c1_1	YES			YES																	YES
ABR	c1_2	c1_5	c1_22		5	3.42794	0.708223	c1_22	c1_22	c1_22	c1_1	YES			YES																	YES
RIT2	c1_2	c1_4	c1_15		3	1.9239	1	c1_15	c1_4	c1_4	c1_1	YES		YES											YES
VSTM2L	c1_3	c1_9		3	2.28404	1	c1_9	c1_9	c1_9	c1_1		YES						YES
SMPDL3B	c1_3	c1_11	c1_28	c1_46	c1_66		3	1.91425	1	c1_66	c1_46	c1_11	c1_1		YES								YES																	YES
GTF3C5	c1_2	c1_4	c1_14		3	1.93156	1	c1_14	c1_4	c1_4	c1_1	YES		YES										YES
NCAPD2	c1_2	c1_4	c1_15		3	2.06265	1	c1_15	c1_4	c1_4	c1_1	YES		YES											YES
PTPRO	c1_3	c1_11	c1_28		2	1.27708	0	NA	NA	c1_11	c1_1		YES								YES																	YES
MED23	c1_2	c1_6		5	3.89891	0.699615	c1_6	c1_6	c1_6	c1_1	YES				YES
FDFT1	c1_2	c1_5	c1_19	c1_39		4	2.44803	0.339208	c1_39	c1_39	c1_39	c1_1	YES			YES														YES
NPTX1	c1_3	c1_13	c1_38		3	1.94147	1	c1_38	c1_13	c1_13	c1_1		YES										YES																									YES
TOX2	c1_2	c1_4	c1_18		3	1.73399	0.355511	c1_18	c1_4	c1_4	c1_1	YES		YES														YES
ADSS2	c1_3	c1_11	c1_28	c1_44	c1_64		5	3.01687	0.499415	c1_64	c1_44	c1_11	c1_1		YES								YES																	YES
USE1	c1_2	c1_4	c1_14		4	2.77554	0.839339	c1_14	c1_4	c1_4	c1_1	YES		YES										YES
SART3	c1_2	c1_5	c1_19	c1_39		7	4.5438	0.533938	c1_39	c1_39	c1_39	c1_1	YES			YES														YES
ACSBG2	c1_3	c1_11	c1_29	c1_59		4	2.65466	0.660674	c1_59	c1_29	c1_11	c1_1		YES								YES																		YES
SGSM3	c1_2	c1_5	c1_19	c1_39		5	3.5112	0.626803	c1_39	c1_39	c1_39	c1_1	YES			YES														YES
LOC110481017	c1_2	c1_5	c1_22		3	1.97182	1	c1_22	c1_22	c1_22	c1_1	YES			YES																	YES
LOC110480833	c1_3	c1_13	c1_38		3	1.80963	1	c1_38	c1_13	c1_13	c1_1		YES										YES																									YES
PARP6	c1_2	c1_5	c1_25		5	3.31798	0.688653	c1_25	c1_25	c1_25	c1_1	YES			YES																				YES
NUTF2	c1_2	c1_5	c1_19	c1_39		4	3.28141	0.840583	c1_39	c1_39	c1_39	c1_1	YES			YES														YES
GNG3	c1_3	c1_11	c1_28	c1_44	c1_65	c1_72	c1_75		3	1.91375	1	c1_75	c1_44	c1_11	c1_1		YES								YES																	YES
GORAB	c1_3	c1_11	c1_28	c1_44	c1_64		4	2.54463	0.832455	c1_64	c1_44	c1_11	c1_1		YES								YES																	YES
LOC110483488	c1_3	c1_11	c1_28	c1_45		3	1.99162	1	c1_45	c1_45	c1_11	c1_1		YES								YES																	YES
KCNK3	c1_3	c1_11	c1_28	c1_44	c1_64		4	2.66971	0.490395	c1_64	c1_44	c1_11	c1_1		YES								YES																	YES
LANCL3	c1_3	c1_11	c1_29	c1_59		2	1.38902	1	c1_59	c1_29	c1_11	c1_1		YES								YES																		YES
SMC3	c1_3	c1_11	c1_31		4	2.42402	0.511435	c1_31	c1_31	c1_11	c1_1		YES								YES																				YES
LOC116183607	c1_3	c1_13	c1_37		5	3.64245	0.705718	c1_37	c1_13	c1_13	c1_1		YES										YES																								YES
AGO3	c1_3	c1_11	c1_29	c1_60	c1_68		5	3.30683	0.701139	c1_68	c1_29	c1_11	c1_1		YES								YES																		YES
SOD3	c1_2	c1_4	c1_15		5	3.41051	0.704834	c1_15	c1_4	c1_4	c1_1	YES		YES											YES
TRPM2	c1_2	c1_5	c1_27		4	2.55738	0.686335	c1_27	c1_27	c1_27	c1_1	YES			YES																						YES
ARHGAP32	c1_2	c1_5	c1_25		3	2.28474	1	c1_25	c1_25	c1_25	c1_1	YES			YES																				YES
LAS1L	c1_3	c1_13		4	2.56458	0.83552	NA	c1_13	c1_13	c1_1		YES										YES
PLPP7	c1_2	c1_4	c1_15		4	2.74083	0.830101	c1_15	c1_4	c1_4	c1_1	YES		YES											YES
GCC2	c1_3	c1_13	c1_37		5	3.36506	0.503479	c1_37	c1_13	c1_13	c1_1		YES										YES																								YES
SCRT2	c1_2	c1_6		4	2.71494	0.841256	c1_6	c1_6	c1_6	c1_1	YES				YES
PSRC1	c1_3	c1_11	c1_29	c1_59		4	2.75063	0.833812	c1_59	c1_29	c1_11	c1_1		YES								YES																		YES
SACS	c1_3	c1_11	c1_28	c1_57	c1_57	6	4.27086	0.594009	c1_57	c1_57	c1_11	c1_1		YES								YES																	YES
LOC110477093	c1_2	c1_5	c1_26		4	2.47887	0.522857	c1_26	c1_26	c1_26	c1_1	YES			YES																					YES
LOC110469041	c1_3	c1_9		4	2.55589	0.679699	c1_9	c1_9	c1_9	c1_1		YES						YES
USP1	c1_3	c1_11	c1_28	c1_54		5	3.0279	0.716621	c1_54	c1_54	c1_11	c1_1		YES								YES																	YES
LOC110482110	c1_2	c1_5	c1_25		5	3.45622	0.712421	c1_25	c1_25	c1_25	c1_1	YES			YES																				YES
LOC110474715	c1_3	c1_11	c1_28		3	1.82619	1	NA	NA	c1_11	c1_1		YES								YES																	YES
ABCC4	c1_2	c1_4	c1_15		3	2.01844	1	c1_15	c1_4	c1_4	c1_1	YES		YES											YES
PNP	c1_2	c1_5	c1_20	c1_42		3	1.97898	1	c1_42	c1_20	c1_20	c1_1	YES			YES															YES
LOC116184522	c1_3	c1_11	c1_28	c1_44	c1_64		4	2.57411	0.503686	c1_64	c1_44	c1_11	c1_1		YES								YES																	YES
RND3	c1_3	c1_11	c1_28		2	1.24099	1	NA	NA	c1_11	c1_1		YES								YES																	YES
ATG4B	c1_2	c1_4	c1_15		5	3.43863	0.69904	c1_15	c1_4	c1_4	c1_1	YES		YES											YES
MICALL1	c1_3		3	1.97209	1	NA	NA	NA	c1_1		YES
TSPAN5	c1_2		4	2.63154	0.8257	NA	NA	NA	c1_1	YES
TMEM88B	c1_2	c1_5	c1_25		5	3.13087	0.489499	c1_25	c1_25	c1_25	c1_1	YES			YES																				YES
ADAMTSL3	c1_2	c1_4	c1_14		4	2.68801	0.831539	c1_14	c1_4	c1_4	c1_1	YES		YES										YES
COMMD6	c1_2	c1_5	c1_25		5	3.33611	0.602423	c1_25	c1_25	c1_25	c1_1	YES			YES																				YES
MAPK4	c1_3	c1_11	c1_28		4	2.54389	0.517285	NA	NA	c1_11	c1_1		YES								YES																	YES
ACYP1	c1_2	c1_4	c1_15		10	7.44101	0.361933	c1_15	c1_4	c1_4	c1_1	YES		YES											YES
PLPP4	c1_3	c1_11	c1_28	c1_46	c1_66		4	2.53669	0.667616	c1_66	c1_46	c1_11	c1_1		YES								YES																	YES
PTMS	c1_2	c1_5	c1_25		7	4.60585	0.446462	c1_25	c1_25	c1_25	c1_1	YES			YES																				YES
LEO1	c1_3	c1_11	c1_28	c1_44	c1_64		3	1.84167	1	c1_64	c1_44	c1_11	c1_1		YES								YES																	YES
TBC1D8B	c1_2	c1_4	c1_18		5	3.18905	0.715085	c1_18	c1_4	c1_4	c1_1	YES		YES														YES
GAK	c1_2	c1_5	c1_25		3	2.21519	1	c1_25	c1_25	c1_25	c1_1	YES			YES																				YES
LOC110469188	c1_2	c1_5	c1_20	c1_41		4	2.75635	0.835169	c1_41	c1_20	c1_20	c1_1	YES			YES															YES
SLC30A6	c1_3	c1_11	c1_28	c1_44	c1_64		3	2.15716	1	c1_64	c1_44	c1_11	c1_1		YES								YES																	YES
PAPPA	c1_3	c1_11	c1_29	c1_59		3	1.92103	1	c1_59	c1_29	c1_11	c1_1		YES								YES																		YES
LOC110468975	c1_2	c1_8		8	4.84789	0.336317	c1_8	c1_8	c1_8	c1_1	YES						YES
MAGI2	c1_2	c1_4	c1_14		4	2.72099	0.833583	c1_14	c1_4	c1_4	c1_1	YES		YES										YES
MRPL11	c1_3	c1_11	c1_33		4	2.28146	0.512319	c1_33	c1_33	c1_11	c1_1		YES								YES																						YES
CCND2	c1_2	c1_5	c1_21		6	3.60629	0.336647	c1_21	c1_21	c1_21	c1_1	YES			YES																YES
KCNAB1	c1_2	c1_5	c1_22		5	3.79892	0.697798	c1_22	c1_22	c1_22	c1_1	YES			YES																	YES
IL17D	c1_3	c1_11	c1_28	c1_44	c1_64		3	2.0342	1	c1_64	c1_44	c1_11	c1_1		YES								YES																	YES
MAP9	c1_3	c1_11	c1_28	c1_58		6	4.20764	0.602966	c1_58	c1_58	c1_11	c1_1		YES								YES																	YES
TSTD3	c1_2	c1_4	c1_14		6	3.80713	0.616466	c1_14	c1_4	c1_4	c1_1	YES		YES										YES
LOC110469797	c1_2	c1_5	c1_26		8	5.51152	0.442364	c1_26	c1_26	c1_26	c1_1	YES			YES																					YES
RBBP5	c1_3	c1_11	c1_30		3	1.9201	1	c1_30	c1_30	c1_11	c1_1		YES								YES																			YES
SFSWAP	c1_2		3	1.89274	1	NA	NA	NA	c1_1	YES
PHETA2	c1_2	c1_5	c1_19	c1_40	c1_62	c1_71		5	3.40302	0.70635	c1_71	c1_40	c1_40	c1_1	YES			YES														YES
MYCN	c1_3	c1_11	c1_28	c1_56		4	2.39636	0.848119	c1_56	c1_56	c1_11	c1_1		YES								YES																	YES
GPR139	c1_3	c1_11	c1_28		4	2.48651	0.83705	NA	NA	c1_11	c1_1		YES								YES																	YES
LOC110480865	c1_3	c1_13	c1_38		3	2.16196	1	c1_38	c1_13	c1_13	c1_1		YES										YES																									YES
TMEM200C	c1_3	c1_10		3	1.93475	1	c1_10	c1_10	c1_10	c1_1		YES							YES
SOSTDC1	c1_3	c1_11	c1_28	c1_44	c1_65	c1_72	c1_74		4	2.58719	0.505255	c1_74	c1_44	c1_11	c1_1		YES								YES																	YES
LOC116184754	c1_3	c1_11	c1_28	c1_44	c1_64		3	2.00604	1	c1_64	c1_44	c1_11	c1_1		YES								YES																	YES
CTXN1	c1_3	c1_9		4	2.52645	0.83857	c1_9	c1_9	c1_9	c1_1		YES						YES
TMEM213	c1_3	c1_11	c1_32		4	2.69686	0.840133	c1_32	c1_32	c1_11	c1_1		YES								YES																					YES
SETD4	c1_2	c1_6		3	2.14113	1	c1_6	c1_6	c1_6	c1_1	YES				YES
AGGF1	c1_2	c1_5	c1_20	c1_42		6	3.87291	0.521247	c1_42	c1_20	c1_20	c1_1	YES			YES															YES
DPH5	c1_3	c1_11		3	2.00885	1	NA	NA	c1_11	c1_1		YES								YES
FRYL	c1_3	c1_11	c1_29	c1_61		5	3.25729	0.710564	c1_61	c1_29	c1_11	c1_1		YES								YES																		YES
SMCO4	c1_3	c1_11	c1_28	c1_44	c1_64		3	2.06599	1	c1_64	c1_44	c1_11	c1_1		YES								YES																	YES
SIX2	c1_3	c1_11	c1_28	c1_44	c1_65	c1_73		4	3.16355	0.844313	c1_73	c1_44	c1_11	c1_1		YES								YES																	YES
NOA1	c1_2	c1_5	c1_19	c1_40	c1_62	c1_71		6	4.199	0.479346	c1_71	c1_40	c1_40	c1_1	YES			YES														YES
USP33	c1_2	c1_5	c1_27		4	2.68842	0.840072	c1_27	c1_27	c1_27	c1_1	YES			YES																						YES
FHL1	c1_2	c1_4	c1_15		3	1.99021	1	c1_15	c1_4	c1_4	c1_1	YES		YES											YES
SRRM1	c1_2	c1_5	c1_19	c1_40	c1_63		8	5.00688	0.462015	c1_63	c1_40	c1_40	c1_1	YES			YES														YES
GFRA2	c1_3	c1_11		4	2.44814	0.830232	NA	NA	c1_11	c1_1		YES								YES
UTP18	c1_3	c1_11	c1_29	c1_61		3	2.04109	1	c1_61	c1_29	c1_11	c1_1		YES								YES																		YES
SLC4A4	c1_2	c1_5	c1_20	c1_42		4	2.65123	0.825483	c1_42	c1_20	c1_20	c1_1	YES			YES															YES
CNOT4	c1_2	c1_5	c1_19	c1_39		5	3.46998	0.623867	c1_39	c1_39	c1_39	c1_1	YES			YES														YES
TEAD3	c1_3	c1_11	c1_29	c1_59		3	1.83611	0.69336	c1_59	c1_29	c1_11	c1_1		YES								YES																		YES
GTF2F1	c1_3	c1_11	c1_28	c1_44	c1_65	c1_72	c1_74		3	2.20848	1	c1_74	c1_44	c1_11	c1_1		YES								YES																	YES
SELENOP	c1_3	c1_11	c1_28		4	2.37889	0.844694	NA	NA	c1_11	c1_1		YES								YES																	YES
LOC116183823	c1_2	c1_4		3	1.87903	0.688886	NA	c1_4	c1_4	c1_1	YES		YES
AP4M1	c1_3	c1_11	c1_32		6	4.13458	0.479131	c1_32	c1_32	c1_11	c1_1		YES								YES																					YES
TMEM158	c1_3	c1_9		5	3.11731	0.695852	c1_9	c1_9	c1_9	c1_1		YES						YES
LPP	c1_3	c1_11	c1_28	c1_44	c1_64		3	2.13867	1	c1_64	c1_44	c1_11	c1_1		YES								YES																	YES
LOC110470897	c1_2	c1_5	c1_25		2	1.20684	1	c1_25	c1_25	c1_25	c1_1	YES			YES																				YES
KCNA4	c1_2	c1_4	c1_14		12	8.18593	0.323416	c1_14	c1_4	c1_4	c1_1	YES		YES										YES
LOC110467905	c1_2	c1_4	c1_15		3	1.83974	1	c1_15	c1_4	c1_4	c1_1	YES		YES											YES
LOC110473194	c1_3	c1_11	c1_28	c1_56		4	2.44896	0.666472	c1_56	c1_56	c1_11	c1_1		YES								YES																	YES
GNAI2	c1_3	c1_11	c1_29		3	1.98489	1	NA	c1_29	c1_11	c1_1		YES								YES																		YES
FGF10	c1_2	c1_5	c1_23		1	0.708563	NaN	c1_23	c1_23	c1_23	c1_1	YES			YES																		YES
MAPKAP1	c1_3	c1_11		3	1.77433	1	NA	NA	c1_11	c1_1		YES								YES
USP30	c1_3	c1_11	c1_28		5	3.04426	0.530188	NA	NA	c1_11	c1_1		YES								YES																	YES
MLH1	c1_2	c1_4	c1_15		8	6.11652	0.470945	c1_15	c1_4	c1_4	c1_1	YES		YES											YES
KLHL18	c1_3	c1_13	c1_38		7	4.84986	0.523912	c1_38	c1_13	c1_13	c1_1		YES										YES																									YES
NAV3	c1_3	c1_11		4	2.37688	0.487644	NA	NA	c1_11	c1_1		YES								YES
VAMP8	c1_2	c1_6		4	2.78833	0.842216	c1_6	c1_6	c1_6	c1_1	YES				YES
CERCAM	c1_3	c1_11	c1_28	c1_55		1	0.706064	NaN	c1_55	c1_55	c1_11	c1_1		YES								YES																	YES
CENPM	c1_2	c1_4	c1_15		4	2.92214	0.669379	c1_15	c1_4	c1_4	c1_1	YES		YES											YES
ZCCHC17	c1_3	c1_11		1	0.705891	NaN	NA	NA	c1_11	c1_1		YES								YES
METTL14	c1_3	c1_11	c1_29	c1_60	c1_68		5	3.28527	0.716145	c1_68	c1_29	c1_11	c1_1		YES								YES																		YES
FKBP11	c1_3	c1_9		4	2.48781	0.842886	c1_9	c1_9	c1_9	c1_1		YES						YES
CYLD	c1_3	c1_13	c1_37		4	2.83351	0.839765	c1_37	c1_13	c1_13	c1_1		YES										YES																								YES
SNRNP25	c1_3	c1_9		5	2.95203	0.499885	c1_9	c1_9	c1_9	c1_1		YES						YES
DPP10	c1_2	c1_5	c1_26		4	2.53706	0.516705	c1_26	c1_26	c1_26	c1_1	YES			YES																					YES
TMEM200A	c1_2	c1_5	c1_19	c1_39		3	2.11322	1	c1_39	c1_39	c1_39	c1_1	YES			YES														YES
MRPL41	c1_3	c1_9		3	1.91877	1	c1_9	c1_9	c1_9	c1_1		YES						YES
CNNM1	c1_2	c1_4	c1_14		4	2.30539	0.848054	c1_14	c1_4	c1_4	c1_1	YES		YES										YES
UBE2K	c1_2	c1_5	c1_19	c1_40	c1_63		5	3.25289	0.71219	c1_63	c1_40	c1_40	c1_1	YES			YES														YES
NPY2R	c1_2	c1_5	c1_26		6	3.88865	0.529726	c1_26	c1_26	c1_26	c1_1	YES			YES																					YES
FGD6	c1_2	c1_4	c1_15		4	2.44732	0.685011	c1_15	c1_4	c1_4	c1_1	YES		YES											YES
ARFRP1	c1_3	c1_11	c1_28	c1_44	c1_65	c1_72	c1_74		3	2.10736	1	c1_74	c1_44	c1_11	c1_1		YES								YES																	YES
ANAPC2	c1_3	c1_11	c1_30		5	2.9575	0.60941	c1_30	c1_30	c1_11	c1_1		YES								YES																			YES
UBE2I	c1_3	c1_11	c1_29	c1_59		4	2.70324	0.832494	c1_59	c1_29	c1_11	c1_1		YES								YES																		YES
CASD1	c1_2	c1_5	c1_26		11	7.06091	0.318206	c1_26	c1_26	c1_26	c1_1	YES			YES																					YES
TRAK1	c1_3	c1_11	c1_28	c1_44	c1_64	c1_1	c1_3	c1_11	c1_28	c1_44	15	10.9791	0.266357	c1_64	c1_44	c1_11	c1_1		YES								YES																	YES
CALB2	c1_2	c1_5	c1_27		5	3.34361	0.508987	c1_27	c1_27	c1_27	c1_1	YES			YES																						YES
LOC110467620	c1_3	c1_11	c1_28	c1_52		4	2.72268	0.828814	c1_52	c1_52	c1_11	c1_1		YES								YES																	YES
FOXL2	c1_2	c1_5	c1_22		3	2.1534	1	c1_22	c1_22	c1_22	c1_1	YES			YES																	YES
NMRK2	c1_3	c1_11	c1_28	c1_44	c1_64		4	2.57521	0.51827	c1_64	c1_44	c1_11	c1_1		YES								YES																	YES
STK39	c1_2	c1_5		3	1.75018	1	NA	NA	NA	c1_1	YES			YES
EWSR1	c1_2	c1_4	c1_15		6	3.78257	0.540263	c1_15	c1_4	c1_4	c1_1	YES		YES											YES
NCKAP1	c1_3	c1_11	c1_29	c1_59		3	1.90967	1	c1_59	c1_29	c1_11	c1_1		YES								YES																		YES
EGF	c1_3	c1_11	c1_29	c1_59		6	4.20895	0.616918	c1_59	c1_29	c1_11	c1_1		YES								YES																		YES
CAMK2B	c1_2	c1_5	c1_25		4	2.46228	0.488939	c1_25	c1_25	c1_25	c1_1	YES			YES																				YES
MN1	c1_3	c1_11	c1_28	c1_46	c1_67		5	3.00522	0.62199	c1_67	c1_46	c1_11	c1_1		YES								YES																	YES
SLITRK2	c1_3	c1_11	c1_28	c1_55		7	4.78709	0.500386	c1_55	c1_55	c1_11	c1_1		YES								YES																	YES
SLC8A3	c1_2	c1_5	c1_20	c1_41		4	3.05834	0.8295	c1_41	c1_20	c1_20	c1_1	YES			YES															YES
LSM1	c1_3	c1_9		5	3.47134	0.716215	c1_9	c1_9	c1_9	c1_1		YES						YES
LSG1	c1_2	c1_5	c1_20	c1_41		4	2.74944	0.833449	c1_41	c1_20	c1_20	c1_1	YES			YES															YES
LOC116184569	c1_2	c1_4	c1_15		3	1.89481	1	c1_15	c1_4	c1_4	c1_1	YES		YES											YES
GAS2L1	c1_2	c1_5	c1_25		3	1.87229	0.33727	c1_25	c1_25	c1_25	c1_1	YES			YES																				YES
LOC110470836	c1_2	c1_4	c1_15		5	3.25857	0.697292	c1_15	c1_4	c1_4	c1_1	YES		YES											YES
FARP1	c1_3	c1_11	c1_28	c1_44	c1_64		2	1.28238	1	c1_64	c1_44	c1_11	c1_1		YES								YES																	YES
SLC10A1	c1_3	c1_11	c1_28	c1_44	c1_65	c1_72	c1_74		5	3.66566	0.709403	c1_74	c1_44	c1_11	c1_1		YES								YES																	YES
AMMECR1L	c1_2	c1_5	c1_27		3	2.05594	1	c1_27	c1_27	c1_27	c1_1	YES			YES																						YES
M1AP	c1_2	c1_6		4	2.68845	0.6893	c1_6	c1_6	c1_6	c1_1	YES				YES
PHF21B	c1_3	c1_11	c1_28	c1_44	c1_65	c1_72	c1_75		3	2.02798	1	c1_75	c1_44	c1_11	c1_1		YES								YES																	YES
NCKIPSD	c1_2	c1_4	c1_15		5	3.31276	0.702638	c1_15	c1_4	c1_4	c1_1	YES		YES											YES
BCL2L11	c1_2	c1_5	c1_22		3	2.0347	1	c1_22	c1_22	c1_22	c1_1	YES			YES																	YES
TMED3	c1_3	c1_11	c1_28	c1_49		4	2.48314	0.695679	c1_49	c1_49	c1_11	c1_1		YES								YES																	YES
PARVA	c1_3	c1_11	c1_28	c1_49		4	2.28986	0.343491	c1_49	c1_49	c1_11	c1_1		YES								YES																	YES
NAA15	c1_2	c1_5	c1_25		3	1.89757	1	c1_25	c1_25	c1_25	c1_1	YES			YES																				YES
LOC110483102	c1_3	c1_11	c1_28	c1_50	c1_50	7	4.32485	0.418175	c1_50	c1_50	c1_11	c1_1		YES								YES																	YES
PTPRG	c1_2	c1_5	c1_26		5	2.95705	0.702056	c1_26	c1_26	c1_26	c1_1	YES			YES																					YES
LOC110478368	c1_3	c1_11	c1_28		2	1.20547	1	NA	NA	c1_11	c1_1		YES								YES																	YES
TECR	c1_2	c1_4	c1_15		3	1.81597	1	c1_15	c1_4	c1_4	c1_1	YES		YES											YES
ZNF831	c1_3	c1_11	c1_29		2	1.26642	1	NA	c1_29	c1_11	c1_1		YES								YES																		YES
LOC110480379	c1_3	c1_11		3	1.91207	1	NA	NA	c1_11	c1_1		YES								YES
CRYAB	c1_2	c1_4	c1_15		3	1.7831	1	c1_15	c1_4	c1_4	c1_1	YES		YES											YES
GSS	c1_2	c1_5	c1_19	c1_39		5	3.06988	0.405845	c1_39	c1_39	c1_39	c1_1	YES			YES														YES
SLC4A1AP	c1_3	c1_11	c1_28		7	4.57248	0.489093	NA	NA	c1_11	c1_1		YES								YES																	YES
SPECC1L	c1_2	c1_5	c1_22		3	1.79682	1	c1_22	c1_22	c1_22	c1_1	YES			YES																	YES
EML1	c1_3	c1_11	c1_34		4	2.61749	0.849577	c1_34	c1_34	c1_11	c1_1		YES								YES																							YES
CHAC1	c1_2	c1_4	c1_14		3	2.11242	1	c1_14	c1_4	c1_4	c1_1	YES		YES										YES
KIAA1324	c1_3	c1_11		4	2.44051	0.846044	NA	NA	c1_11	c1_1		YES								YES
EP300	c1_2	c1_4	c1_15		2	1.19408	1	c1_15	c1_4	c1_4	c1_1	YES		YES											YES
STARD7	c1_3	c1_11	c1_28		3	1.99689	1	NA	NA	c1_11	c1_1		YES								YES																	YES
CGGBP1	c1_2	c1_5	c1_25		4	2.5798	0.67007	c1_25	c1_25	c1_25	c1_1	YES			YES																				YES
PUM1	c1_2	c1_7		6	4.1437	0.464693	c1_7	c1_7	c1_7	c1_1	YES					YES
WDR5	c1_3		3	1.78653	1	NA	NA	NA	c1_1		YES
PCP4	c1_2	c1_4	c1_15		4	2.50564	0.48963	c1_15	c1_4	c1_4	c1_1	YES		YES											YES
RCBTB1	c1_2	c1_4	c1_17		5	3.12013	0.717221	c1_17	c1_4	c1_4	c1_1	YES		YES													YES
SCAMP4	c1_3	c1_11	c1_28		3	1.84357	1	NA	NA	c1_11	c1_1		YES								YES																	YES
LOC110469736	c1_3	c1_9		3	1.82718	1	c1_9	c1_9	c1_9	c1_1		YES						YES
ZEB1	c1_3	c1_11	c1_28	c1_44	c1_65	c1_72	c1_74		5	3.98336	0.707481	c1_74	c1_44	c1_11	c1_1		YES								YES																	YES
TSHZ2	c1_3	c1_11	c1_29	c1_59		6	3.79803	0.408016	c1_59	c1_29	c1_11	c1_1		YES								YES																		YES
IL11RA	c1_2	c1_4	c1_15		6	3.71452	0.477298	c1_15	c1_4	c1_4	c1_1	YES		YES											YES
ATP6V0A2	c1_3	c1_11	c1_29	c1_59		4	2.52451	0.660257	c1_59	c1_29	c1_11	c1_1		YES								YES																		YES
MRPL58	c1_3	c1_11	c1_28	c1_46	c1_66		3	1.78075	0.336757	c1_66	c1_46	c1_11	c1_1		YES								YES																	YES
CCDC88A	c1_3	c1_11	c1_30		9	6.23219	0.43212	c1_30	c1_30	c1_11	c1_1		YES								YES																			YES
NPTX2	c1_3	c1_11	c1_28		3	1.76466	1	NA	NA	c1_11	c1_1		YES								YES																	YES
C21H1orf159	c1_3	c1_11	c1_32		3	1.8957	0.68228	c1_32	c1_32	c1_11	c1_1		YES								YES																					YES
CAVIN2	c1_3	c1_13	c1_38		3	1.86313	1	c1_38	c1_13	c1_13	c1_1		YES										YES																									YES
KIF21B	c1_2	c1_4	c1_15		4	2.36259	0.80702	c1_15	c1_4	c1_4	c1_1	YES		YES											YES
DHX35	c1_2	c1_5	c1_19	c1_39		5	3.41267	0.606242	c1_39	c1_39	c1_39	c1_1	YES			YES														YES
LOC110483430	c1_2	c1_5	c1_25		2	1.18999	1	c1_25	c1_25	c1_25	c1_1	YES			YES																				YES
LMO4	c1_2	c1_5	c1_19	c1_40	c1_63		3	2.0477	1	c1_63	c1_40	c1_40	c1_1	YES			YES														YES
LOC110484917	c1_2	c1_5	c1_25		4	2.58791	0.843968	c1_25	c1_25	c1_25	c1_1	YES			YES																				YES
CLU	c1_2	c1_4	c1_15		4	2.63051	0.832235	c1_15	c1_4	c1_4	c1_1	YES		YES											YES
EPDR1	c1_3	c1_13	c1_37		4	2.61943	0.539347	c1_37	c1_13	c1_13	c1_1		YES										YES																								YES
CLPTM1	c1_3	c1_11	c1_28	c1_44	c1_65	c1_72	c1_74		3	2.03237	1	c1_74	c1_44	c1_11	c1_1		YES								YES																	YES
LOC110481727	c1_2	c1_6		5	3.53737	0.697655	c1_6	c1_6	c1_6	c1_1	YES				YES
RTN4RL1	c1_3	c1_11	c1_29	c1_59		5	3.65405	0.699609	c1_59	c1_29	c1_11	c1_1		YES								YES																		YES
LIMA1	c1_3	c1_11	c1_28	c1_44	c1_64		3	1.93915	1	c1_64	c1_44	c1_11	c1_1		YES								YES																	YES
CELF5	c1_2		6	3.65092	0.526347	NA	NA	NA	c1_1	YES
RHBDL3	c1_2	c1_7		2	1.27259	1	c1_7	c1_7	c1_7	c1_1	YES					YES
IRAK2	c1_2	c1_5	c1_26		3	1.81745	1	c1_26	c1_26	c1_26	c1_1	YES			YES																					YES
CMPK2	c1_3	c1_11		4	2.5324	0.841096	NA	NA	c1_11	c1_1		YES								YES
ARL4C	c1_3	c1_11	c1_29	c1_59		2	1.20233	1	c1_59	c1_29	c1_11	c1_1		YES								YES																		YES
TPGS1	c1_3	c1_11	c1_28		5	3.22703	0.494943	NA	NA	c1_11	c1_1		YES								YES																	YES
WDTC1	c1_2	c1_5	c1_20	c1_41		3	2.00033	1	c1_41	c1_20	c1_20	c1_1	YES			YES															YES
MEX3A	c1_3	c1_11	c1_28	c1_55		3	1.693	1	c1_55	c1_55	c1_11	c1_1		YES								YES																	YES
INTS12	c1_3	c1_11	c1_28	c1_44	c1_64		2	1.2067	1	c1_64	c1_44	c1_11	c1_1		YES								YES																	YES
LOC110478553	c1_3	c1_11	c1_28		4	2.30005	0.347837	NA	NA	c1_11	c1_1		YES								YES																	YES
RAB19	c1_2	c1_4	c1_15		4	2.75125	0.83475	c1_15	c1_4	c1_4	c1_1	YES		YES											YES
DGCR8	c1_3	c1_11		3	1.89973	1	NA	NA	c1_11	c1_1		YES								YES
PROCA1	c1_3	c1_11	c1_28	c1_44	c1_65	c1_72	c1_75		3	2.11717	1	c1_75	c1_44	c1_11	c1_1		YES								YES																	YES
SAP30	c1_3	c1_13	c1_37		3	2.12483	1	c1_37	c1_13	c1_13	c1_1		YES										YES																								YES
C7H2orf76	c1_3	c1_11	c1_28	c1_44	c1_64		4	2.45024	0.822825	c1_64	c1_44	c1_11	c1_1		YES								YES																	YES
LOC110469590	c1_3	c1_11	c1_34		4	2.45641	0.824854	c1_34	c1_34	c1_11	c1_1		YES								YES																							YES
RANBP1	c1_3	c1_11	c1_28		1	0.686497	NaN	NA	NA	c1_11	c1_1		YES								YES																	YES
SNRPB2	c1_2	c1_5	c1_25		4	2.53132	0.668412	c1_25	c1_25	c1_25	c1_1	YES			YES																				YES
NPTXR	c1_2	c1_4	c1_15		5	3.25672	0.310478	c1_15	c1_4	c1_4	c1_1	YES		YES											YES
HS6ST3	c1_3	c1_11	c1_29	c1_59		4	2.57484	0.333333	c1_59	c1_29	c1_11	c1_1		YES								YES																		YES
ELP1	c1_3	c1_13	c1_38		3	1.88873	1	c1_38	c1_13	c1_13	c1_1		YES										YES																									YES
MEIS2	c1_3	c1_11	c1_28	c1_44	c1_65	c1_72	c1_74		3	1.81746	1	c1_74	c1_44	c1_11	c1_1		YES								YES																	YES
IFI30	c1_2	c1_4	c1_14		6	3.30649	0.597214	c1_14	c1_4	c1_4	c1_1	YES		YES										YES
LOC110483164	c1_3	c1_11	c1_28	c1_44	c1_64		3	1.98307	1	c1_64	c1_44	c1_11	c1_1		YES								YES																	YES
PLPP6	c1_3	c1_13	c1_37		5	3.09214	0.604475	c1_37	c1_13	c1_13	c1_1		YES										YES																								YES
WDR35	c1_2	c1_5	c1_25		3	1.97752	1	c1_25	c1_25	c1_25	c1_1	YES			YES																				YES
ARHGAP20	c1_3	c1_11	c1_34		3	1.74355	1	c1_34	c1_34	c1_11	c1_1		YES								YES																							YES
STAG1	c1_3	c1_11	c1_29	c1_59		3	2.01135	1	c1_59	c1_29	c1_11	c1_1		YES								YES																		YES
TENT5A	c1_2	c1_5	c1_26		5	3.17192	0.694306	c1_26	c1_26	c1_26	c1_1	YES			YES																					YES
SLC7A14	c1_2	c1_5	c1_19	c1_39		6	4.49557	0.611867	c1_39	c1_39	c1_39	c1_1	YES			YES														YES
FIG4	c1_2	c1_5	c1_19	c1_39		4	2.50872	0.832475	c1_39	c1_39	c1_39	c1_1	YES			YES														YES
SYNCRIP	c1_2	c1_5	c1_26		4	2.28124	0.843948	c1_26	c1_26	c1_26	c1_1	YES			YES																					YES
TENT5D	c1_3	c1_11	c1_29	c1_59		3	1.86371	1	c1_59	c1_29	c1_11	c1_1		YES								YES																		YES
RAD1	c1_2	c1_5	c1_27		3	1.85665	1	c1_27	c1_27	c1_27	c1_1	YES			YES																						YES
CNTNAP5	c1_3	c1_11	c1_28		2	1.26078	1	NA	NA	c1_11	c1_1		YES								YES																	YES
PRKAA1	c1_2	c1_4	c1_18		4	2.49408	0.818873	c1_18	c1_4	c1_4	c1_1	YES		YES														YES
TJP1	c1_2	c1_4		4	3.0653	0.842317	NA	c1_4	c1_4	c1_1	YES		YES
TCF12	c1_3	c1_11	c1_30		7	4.05123	0.385856	c1_30	c1_30	c1_11	c1_1		YES								YES																			YES
C2CD2	c1_3	c1_11	c1_28		4	2.50651	0.513487	NA	NA	c1_11	c1_1		YES								YES																	YES
SGO2	c1_3	c1_11	c1_36		2	1.31035	0	c1_36	c1_36	c1_11	c1_1		YES								YES																									YES
KLHDC10	c1_3	c1_11	c1_34		3	1.6671	1	c1_34	c1_34	c1_11	c1_1		YES								YES																							YES
MXD4	c1_2	c1_4	c1_15		6	3.98619	0.467565	c1_15	c1_4	c1_4	c1_1	YES		YES											YES
PRNP	c1_3	c1_11	c1_28	c1_44	c1_65	c1_73		5	3.78764	0.708443	c1_73	c1_44	c1_11	c1_1		YES								YES																	YES
LEPROT	c1_3	c1_11	c1_33		6	3.83045	0.603014	c1_33	c1_33	c1_11	c1_1		YES								YES																						YES
SPATS2L	c1_3	c1_11	c1_28		4	2.41606	0.529699	NA	NA	c1_11	c1_1		YES								YES																	YES
RUVBL1	c1_3	c1_11	c1_28		3	1.84319	0.331913	NA	NA	c1_11	c1_1		YES								YES																	YES
RUSC1	c1_2	c1_5	c1_23		4	2.75601	0.495268	c1_23	c1_23	c1_23	c1_1	YES			YES																		YES
MAP3K1	c1_2	c1_4	c1_14		6	3.65792	0.532036	c1_14	c1_4	c1_4	c1_1	YES		YES										YES
NT5C2	c1_2	c1_4	c1_15		4	2.84308	0.666667	c1_15	c1_4	c1_4	c1_1	YES		YES											YES
LOC110476885	c1_3	c1_11	c1_28		6	3.70548	0.34327	NA	NA	c1_11	c1_1		YES								YES																	YES
LOC110475834	c1_3	c1_11	c1_29	c1_59		3	1.71743	0.697495	c1_59	c1_29	c1_11	c1_1		YES								YES																		YES
LOC110470480	c1_3	c1_9		4	2.52669	0.487722	c1_9	c1_9	c1_9	c1_1		YES						YES
BCAN	c1_3	c1_11	c1_28	c1_44	c1_65	c1_72	c1_74		3	1.73082	1	c1_74	c1_44	c1_11	c1_1		YES								YES																	YES
MYL9	c1_3	c1_9		4	2.62868	0.66773	c1_9	c1_9	c1_9	c1_1		YES						YES
STARD4	c1_3	c1_11	c1_28	c1_48		3	1.79518	1	c1_48	c1_48	c1_11	c1_1		YES								YES																	YES
LMTK2	c1_2	c1_5	c1_19	c1_39		2	1.30278	0	c1_39	c1_39	c1_39	c1_1	YES			YES														YES
B2M	c1_3	c1_11	c1_29	c1_60		4	2.38174	0.515199	NA	c1_29	c1_11	c1_1		YES								YES																		YES
LYAR	c1_3	c1_11	c1_28	c1_44	c1_64		4	2.58373	0.511659	c1_64	c1_44	c1_11	c1_1		YES								YES																	YES
ZNF341	c1_2	c1_4	c1_17		7	4.25999	0.343152	c1_17	c1_4	c1_4	c1_1	YES		YES													YES
ARID5B	c1_3	c1_9		6	3.84499	0.0642052	c1_9	c1_9	c1_9	c1_1		YES						YES
TMEM163	c1_3	c1_9		1	0.676414	NaN	c1_9	c1_9	c1_9	c1_1		YES						YES
RNF165	c1_3	c1_9		1	0.676399	NaN	c1_9	c1_9	c1_9	c1_1		YES						YES
ZNF385D	c1_2	c1_5	c1_22	c1_1	15	10.9646	0.264885	c1_22	c1_22	c1_22	c1_1	YES			YES																	YES
LOC110470923	c1_3	c1_9		4	2.59527	0.52382	c1_9	c1_9	c1_9	c1_1		YES						YES
NTN1	c1_3	c1_11	c1_29	c1_60	c1_68		3	1.81277	0.686109	c1_68	c1_29	c1_11	c1_1		YES								YES																		YES
LOC110469658	c1_3	c1_9		3	1.91342	1	c1_9	c1_9	c1_9	c1_1		YES						YES
AZIN1	c1_3	c1_11	c1_28	c1_44	c1_64		4	2.71002	0.842454	c1_64	c1_44	c1_11	c1_1		YES								YES																	YES
LOC110481429	c1_3	c1_9		3	2.05886	1	c1_9	c1_9	c1_9	c1_1		YES						YES
LOC110480216	c1_2	c1_4	c1_15		5	2.93055	0.399423	c1_15	c1_4	c1_4	c1_1	YES		YES											YES
DOHH	c1_2	c1_5	c1_26		3	1.76187	1	c1_26	c1_26	c1_26	c1_1	YES			YES																					YES
BEND6	c1_3	c1_13	c1_37		11	7.39209	0.280643	c1_37	c1_13	c1_13	c1_1		YES										YES																								YES
ADAM10	c1_2	c1_5	c1_19	c1_40	c1_63	c1_63	12	7.94369	0.325022	c1_63	c1_40	c1_40	c1_1	YES			YES														YES
GPR12	c1_2	c1_4	c1_15		3	1.74685	1	c1_15	c1_4	c1_4	c1_1	YES		YES											YES
SOX4	c1_3	c1_9		3	1.80931	0.330651	c1_9	c1_9	c1_9	c1_1		YES						YES
LOC110472081	c1_2	c1_4	c1_14		3	1.72427	1	c1_14	c1_4	c1_4	c1_1	YES		YES										YES
SACM1L	c1_3	c1_11	c1_28	c1_44	c1_65	c1_72	c1_74		11	8.20752	0.353829	c1_74	c1_44	c1_11	c1_1		YES								YES																	YES
LOC110467910	c1_2	c1_4	c1_15		3	1.97545	1	c1_15	c1_4	c1_4	c1_1	YES		YES											YES
FAAP100	c1_3	c1_11	c1_29		3	1.76496	1	NA	c1_29	c1_11	c1_1		YES								YES																		YES
GRK5	c1_3	c1_11	c1_31		5	3.23635	0.705688	c1_31	c1_31	c1_11	c1_1		YES								YES																				YES
LOC110482494	c1_3	c1_11	c1_28	c1_44	c1_65	c1_73		3	1.85607	1	c1_73	c1_44	c1_11	c1_1		YES								YES																	YES
SLC37A2	c1_3	c1_11	c1_29	c1_60	c1_68		3	1.80055	1	c1_68	c1_29	c1_11	c1_1		YES								YES																		YES
PPP4R3A	c1_2	c1_4	c1_15		8	5.6086	0.426239	c1_15	c1_4	c1_4	c1_1	YES		YES											YES
ALKBH5	c1_3	c1_11	c1_28	c1_48		7	4.19775	0.503608	c1_48	c1_48	c1_11	c1_1		YES								YES																	YES
SIN3A	c1_2	c1_5	c1_19	c1_39		4	2.82505	0.832706	c1_39	c1_39	c1_39	c1_1	YES			YES														YES
ADAT2	c1_3	c1_9		7	4.83749	0.53744	c1_9	c1_9	c1_9	c1_1		YES						YES
LOC110478823	c1_3	c1_11	c1_29	c1_59		4	2.95126	0.683476	c1_59	c1_29	c1_11	c1_1		YES								YES																		YES
ARL13B	c1_3	c1_11	c1_28	c1_54		2	1.18825	1	c1_54	c1_54	c1_11	c1_1		YES								YES																	YES
KCNQ2	c1_2	c1_5	c1_22		3	1.94877	1	c1_22	c1_22	c1_22	c1_1	YES			YES																	YES
PCDH18	c1_2	c1_4	c1_14		8	5.60542	0.46864	c1_14	c1_4	c1_4	c1_1	YES		YES										YES
TLE3	c1_2	c1_4	c1_14		8	5.97605	0.435901	c1_14	c1_4	c1_4	c1_1	YES		YES										YES
LOC110475525	c1_3	c1_11		1	0.66863	NaN	NA	NA	c1_11	c1_1		YES								YES
TSN	c1_2	c1_5	c1_19	c1_39		3	1.80176	1	c1_39	c1_39	c1_39	c1_1	YES			YES														YES
ZBTB7A	c1_2	c1_5	c1_25		2	1.17648	1	c1_25	c1_25	c1_25	c1_1	YES			YES																				YES
LOC110468712	c1_2	c1_4	c1_14		4	2.61596	0.833371	c1_14	c1_4	c1_4	c1_1	YES		YES										YES
C10H15orf40	c1_2	c1_4	c1_15		10	7.00217	0.365251	c1_15	c1_4	c1_4	c1_1	YES		YES											YES
SNRPA1	c1_3	c1_11	c1_29	c1_59		5	3.44716	0.704151	c1_59	c1_29	c1_11	c1_1		YES								YES																		YES
LOC110469030	c1_2	c1_5	c1_20	c1_43		3	1.93356	1	c1_43	c1_20	c1_20	c1_1	YES			YES															YES
CACUL1	c1_2	c1_5	c1_20	c1_42		5	3.18216	0.61594	c1_42	c1_20	c1_20	c1_1	YES			YES															YES
PCNX4	c1_2	c1_4	c1_14		6	3.59612	0.479749	c1_14	c1_4	c1_4	c1_1	YES		YES										YES
C22H2orf68	c1_3	c1_11	c1_28	c1_49		2	1.15195	1	c1_49	c1_49	c1_11	c1_1		YES								YES																	YES
SNAI2	c1_3	c1_11	c1_28	c1_44	c1_65	c1_72	c1_74		3	1.68714	1	c1_74	c1_44	c1_11	c1_1		YES								YES																	YES
CELSR3	c1_2	c1_6		3	2.03251	1	c1_6	c1_6	c1_6	c1_1	YES				YES
LOC110467957	c1_2	c1_8		3	1.85077	0.68606	c1_8	c1_8	c1_8	c1_1	YES						YES
STXBP3	c1_3	c1_9		5	3.14799	0.412453	c1_9	c1_9	c1_9	c1_1		YES						YES
CHEK1	c1_2	c1_5	c1_19	c1_39		3	1.68434	1	c1_39	c1_39	c1_39	c1_1	YES			YES														YES
LOC116184431	c1_3	c1_13	c1_37		3	1.87839	1	c1_37	c1_13	c1_13	c1_1		YES										YES																								YES
FAM163B	c1_2	c1_4	c1_15		1	0.665386	NaN	c1_15	c1_4	c1_4	c1_1	YES		YES											YES
IFT46	c1_3	c1_11	c1_28	c1_55		3	1.81732	1	c1_55	c1_55	c1_11	c1_1		YES								YES																	YES
UTP4	c1_2	c1_4	c1_15		4	2.51308	0.684275	c1_15	c1_4	c1_4	c1_1	YES		YES											YES
RGCC	c1_3	c1_13	c1_38		5	3.15491	0.405668	c1_38	c1_13	c1_13	c1_1		YES										YES																									YES
LOC110471035	c1_3	c1_9		5	3.57885	0.488051	c1_9	c1_9	c1_9	c1_1		YES						YES
LOC110476792	c1_2	c1_5	c1_24		7	4.52168	0.501884	c1_24	c1_24	c1_24	c1_1	YES			YES																			YES
DNALI1	c1_2	c1_4	c1_15		1	0.662321	NaN	c1_15	c1_4	c1_4	c1_1	YES		YES											YES
CAT	c1_2	c1_5	c1_27		3	1.81666	1	c1_27	c1_27	c1_27	c1_1	YES			YES																						YES
ANKRD49	c1_3	c1_11	c1_29	c1_59		5	3.42374	0.403706	c1_59	c1_29	c1_11	c1_1		YES								YES																		YES
PWWP3A	c1_2	c1_5	c1_19	c1_39		3	1.83374	1	c1_39	c1_39	c1_39	c1_1	YES			YES														YES
BOK	c1_3	c1_11	c1_28		2	1.30064	1	NA	NA	c1_11	c1_1		YES								YES																	YES
ZDHHC22	c1_2	c1_4	c1_15		6	3.99899	0.481598	c1_15	c1_4	c1_4	c1_1	YES		YES											YES
NABP1	c1_3	c1_13	c1_37		4	2.30146	0.668489	c1_37	c1_13	c1_13	c1_1		YES										YES																								YES
ZNF618	c1_2	c1_5	c1_27		2	1.16163	1	c1_27	c1_27	c1_27	c1_1	YES			YES																						YES
HSPA5	c1_3	c1_11	c1_28	c1_46	c1_67		4	2.49731	0.663108	c1_67	c1_46	c1_11	c1_1		YES								YES																	YES
STC1	c1_2	c1_4	c1_14		3	1.75639	1	c1_14	c1_4	c1_4	c1_1	YES		YES										YES
NFKBIZ	c1_2	c1_5	c1_19	c1_39		3	1.81792	1	c1_39	c1_39	c1_39	c1_1	YES			YES														YES
LOC110474626	c1_2	c1_4	c1_15		4	2.93367	0.839654	c1_15	c1_4	c1_4	c1_1	YES		YES											YES
SEC22C	c1_3	c1_12		5	3.23048	0.695294	c1_12	c1_12	c1_12	c1_1		YES									YES
RPL18	c1_2	c1_5	c1_25		1	0.656424	NaN	c1_25	c1_25	c1_25	c1_1	YES			YES																				YES
CCK	c1_3	c1_9		6	3.6815	0.59465	c1_9	c1_9	c1_9	c1_1		YES						YES
CADM1	c1_2	c1_5	c1_25		3	1.65652	0.647528	c1_25	c1_25	c1_25	c1_1	YES			YES																				YES
MRPL51	c1_3	c1_11	c1_28		2	1.163	1	NA	NA	c1_11	c1_1		YES								YES																	YES
PPM1E	c1_3	c1_11	c1_28		4	2.53369	0.680328	NA	NA	c1_11	c1_1		YES								YES																	YES
LOC110472880	c1_2	c1_5	c1_25		3	1.78069	1	c1_25	c1_25	c1_25	c1_1	YES			YES																				YES
PCLO	c1_3	c1_11	c1_28	c1_54		3	1.66201	1	c1_54	c1_54	c1_11	c1_1		YES								YES																	YES
TMEM82	c1_2	c1_5	c1_25		3	1.84035	1	c1_25	c1_25	c1_25	c1_1	YES			YES																				YES
GNL2	c1_2	c1_5	c1_25		3	1.76932	1	c1_25	c1_25	c1_25	c1_1	YES			YES																				YES
AGPAT2	c1_2	c1_5		1	0.653154	NaN	NA	NA	NA	c1_1	YES			YES
CNIH3	c1_3	c1_11	c1_29	c1_60		2	1.16877	0	NA	c1_29	c1_11	c1_1		YES								YES																		YES
IL12A	c1_2	c1_6		3	1.87965	0.326308	c1_6	c1_6	c1_6	c1_1	YES				YES
LOC110478017	c1_3	c1_11	c1_28		1	0.652636	NaN	NA	NA	c1_11	c1_1		YES								YES																	YES
RPLP1	c1_3	c1_9		9	5.8973	0.417886	c1_9	c1_9	c1_9	c1_1		YES						YES
WSB2	c1_2		1	0.651242	NaN	NA	NA	NA	c1_1	YES
C4H20orf27	c1_2	c1_4	c1_15		2	1.14909	1	c1_15	c1_4	c1_4	c1_1	YES		YES											YES
HDGFL3	c1_2	c1_4	c1_14		2	1.20931	1	c1_14	c1_4	c1_4	c1_1	YES		YES										YES
NPM3	c1_3	c1_11	c1_28	c1_46	c1_66		6	3.96564	0.47625	c1_66	c1_46	c1_11	c1_1		YES								YES																	YES
LOC110471205	c1_3	c1_11	c1_29	c1_59		2	1.45097	1	c1_59	c1_29	c1_11	c1_1		YES								YES																		YES
P4HTM	c1_2	c1_4	c1_15		3	1.73297	1	c1_15	c1_4	c1_4	c1_1	YES		YES											YES
LOC110481229	c1_3	c1_11	c1_28	c1_44	c1_64		4	2.69265	0.834838	c1_64	c1_44	c1_11	c1_1		YES								YES																	YES
PPM1F	c1_3	c1_9		3	1.64061	1	c1_9	c1_9	c1_9	c1_1		YES						YES
PHF23	c1_2	c1_4	c1_15		4	2.6635	0.84218	c1_15	c1_4	c1_4	c1_1	YES		YES											YES
RASGRP3	c1_2	c1_5	c1_27		1	0.648837	NaN	c1_27	c1_27	c1_27	c1_1	YES			YES																						YES
ATG12	c1_3	c1_13	c1_38		2	1.22612	1	c1_38	c1_13	c1_13	c1_1		YES										YES																									YES
RIC8B	c1_2	c1_5	c1_25		3	1.87353	1	c1_25	c1_25	c1_25	c1_1	YES			YES																				YES
LOC110480953	c1_2	c1_5	c1_24		1	0.648279	NaN	c1_24	c1_24	c1_24	c1_1	YES			YES																			YES
CNGB1	c1_3	c1_11	c1_28	c1_44	c1_64		6	4.18231	0.492725	c1_64	c1_44	c1_11	c1_1		YES								YES																	YES
GBX2	c1_2	c1_5	c1_25		4	2.1704	0.641295	c1_25	c1_25	c1_25	c1_1	YES			YES																				YES
LAPTM5	c1_2	c1_4	c1_15		3	1.70767	1	c1_15	c1_4	c1_4	c1_1	YES		YES											YES
AIF1L	c1_3	c1_11		1	0.647665	NaN	NA	NA	c1_11	c1_1		YES								YES
UAP1	c1_3	c1_11	c1_29	c1_61		3	1.91879	1	c1_61	c1_29	c1_11	c1_1		YES								YES																		YES
MAP7D1	c1_2	c1_4	c1_17		3	1.73266	1	c1_17	c1_4	c1_4	c1_1	YES		YES													YES
ARFIP2	c1_3	c1_9		4	2.39943	0.833823	c1_9	c1_9	c1_9	c1_1		YES						YES
RALYL	c1_3	c1_9		5	3.06849	0.602597	c1_9	c1_9	c1_9	c1_1		YES						YES
FBXO30	c1_2	c1_5	c1_25		2	1.36171	1	c1_25	c1_25	c1_25	c1_1	YES			YES																				YES
SLC10A4	c1_2	c1_8		3	1.75621	0.683695	c1_8	c1_8	c1_8	c1_1	YES						YES
PRKCD	c1_2	c1_4	c1_15		1	0.644577	NaN	c1_15	c1_4	c1_4	c1_1	YES		YES											YES
FGFR3	c1_3	c1_13	c1_37		6	3.78136	0.337087	c1_37	c1_13	c1_13	c1_1		YES										YES																								YES
DGKE	c1_2	c1_4	c1_15		4	2.62757	0.841266	c1_15	c1_4	c1_4	c1_1	YES		YES											YES
LOC110467549	c1_3	c1_11	c1_36		1	0.643856	NaN	c1_36	c1_36	c1_11	c1_1		YES								YES																									YES
HHAT	c1_2	c1_5		1	0.643656	NaN	NA	NA	NA	c1_1	YES			YES
GOLGA7B	c1_2	c1_8		4	2.25049	0.523815	c1_8	c1_8	c1_8	c1_1	YES						YES
LDLRAD4	c1_3	c1_11	c1_28	c1_44	c1_64		3	1.94643	1	c1_64	c1_44	c1_11	c1_1		YES								YES																	YES
C4H4orf50	c1_3	c1_11	c1_28	c1_48		2	1.15892	1	c1_48	c1_48	c1_11	c1_1		YES								YES																	YES
TPCN2	c1_2	c1_5	c1_27		3	2.01415	1	c1_27	c1_27	c1_27	c1_1	YES			YES																						YES
LOC116183112	c1_3	c1_9		2	1.18057	1	c1_9	c1_9	c1_9	c1_1		YES						YES
KCNS3	c1_3	c1_11	c1_31		8	4.96082	0.437287	c1_31	c1_31	c1_11	c1_1		YES								YES																				YES
ZSWIM8	c1_2	c1_5	c1_22		5	3.44901	0.706117	c1_22	c1_22	c1_22	c1_1	YES			YES																	YES
RAB4A	c1_2	c1_4	c1_15		8	5.26407	0.323745	c1_15	c1_4	c1_4	c1_1	YES		YES											YES
BNIP3	c1_3	c1_11	c1_28	c1_44	c1_64		4	2.67186	0.840483	c1_64	c1_44	c1_11	c1_1		YES								YES																	YES
HMGN1	c1_3	c1_11	c1_28		3	2.03258	1	NA	NA	c1_11	c1_1		YES								YES																	YES
GPBP1	c1_3	c1_11	c1_29	c1_59		1	0.640588	NaN	c1_59	c1_29	c1_11	c1_1		YES								YES																		YES
BTBD3	c1_2	c1_5	c1_25		3	1.97499	1	c1_25	c1_25	c1_25	c1_1	YES			YES																				YES
ZNF532	c1_2	c1_4	c1_15		4	2.61806	0.844689	c1_15	c1_4	c1_4	c1_1	YES		YES											YES
CENPV	c1_2	c1_5	c1_26		4	2.23419	0.837008	c1_26	c1_26	c1_26	c1_1	YES			YES																					YES
PGS1	c1_2	c1_5	c1_25		1	0.639954	NaN	c1_25	c1_25	c1_25	c1_1	YES			YES																				YES
USP24	c1_3	c1_11	c1_28		3	1.85429	0.683805	NA	NA	c1_11	c1_1		YES								YES																	YES
FHDC1	c1_3	c1_11	c1_28		3	1.80067	0.344982	NA	NA	c1_11	c1_1		YES								YES																	YES
NUDT9	c1_2	c1_4	c1_14		6	3.96051	0.621092	c1_14	c1_4	c1_4	c1_1	YES		YES										YES
MYH11	c1_2	c1_4	c1_15		5	3.11822	0.686593	c1_15	c1_4	c1_4	c1_1	YES		YES											YES
LOC110474499	c1_2	c1_5	c1_25		3	2.04184	1	c1_25	c1_25	c1_25	c1_1	YES			YES																				YES
NMB	c1_3	c1_11	c1_32		4	2.65032	0.834773	c1_32	c1_32	c1_11	c1_1		YES								YES																					YES
LOC110475931	c1_3	c1_11		1	0.638273	NaN	NA	NA	c1_11	c1_1		YES								YES
F3	c1_3	c1_11	c1_28	c1_44	c1_64		3	1.90437	1	c1_64	c1_44	c1_11	c1_1		YES								YES																	YES
SPINK2	c1_3	c1_11	c1_28	c1_46	c1_67		3	2.12851	1	c1_67	c1_46	c1_11	c1_1		YES								YES																	YES
MTOR	c1_3	c1_11	c1_28	c1_44	c1_64		4	2.71305	0.829047	c1_64	c1_44	c1_11	c1_1		YES								YES																	YES
HAPLN2	c1_3	c1_11	c1_28	c1_44	c1_65	c1_73		2	1.12408	1	c1_73	c1_44	c1_11	c1_1		YES								YES																	YES
RPRML	c1_3	c1_11	c1_31		5	3.07773	0.50955	c1_31	c1_31	c1_11	c1_1		YES								YES																				YES
RYR2	c1_3	c1_13	c1_37		11	7.84611	0.341842	c1_37	c1_13	c1_13	c1_1		YES										YES																								YES
SIK2	c1_2	c1_5	c1_20	c1_42		3	1.73705	1	c1_42	c1_20	c1_20	c1_1	YES			YES															YES
ZFYVE26	c1_2	c1_4	c1_14		6	3.84341	0.48459	c1_14	c1_4	c1_4	c1_1	YES		YES										YES
NATD1	c1_3	c1_11	c1_28		3	1.824	0.660202	NA	NA	c1_11	c1_1		YES								YES																	YES
SLC39A1	c1_3	c1_11	c1_28	c1_53		3	1.88397	1	c1_53	c1_53	c1_11	c1_1		YES								YES																	YES
TPM2	c1_3	c1_11	c1_28	c1_50		4	2.30985	0.828553	c1_50	c1_50	c1_11	c1_1		YES								YES																	YES
SLC4A11	c1_3	c1_9		1	0.63418	NaN	c1_9	c1_9	c1_9	c1_1		YES						YES
NIM1K	c1_3	c1_11	c1_28	c1_50		1	0.633654	NaN	c1_50	c1_50	c1_11	c1_1		YES								YES																	YES
MED14	c1_3	c1_11	c1_28		2	1.23322	0	NA	NA	c1_11	c1_1		YES								YES																	YES
LOC116184078	c1_3	c1_9		3	1.74273	1	c1_9	c1_9	c1_9	c1_1		YES						YES
PCSK6	c1_2	c1_4	c1_14		6	3.65855	0.595333	c1_14	c1_4	c1_4	c1_1	YES		YES										YES
IFT81	c1_3	c1_13	c1_37		4	2.36687	0.667981	c1_37	c1_13	c1_13	c1_1		YES										YES																								YES
SMIM7	c1_3	c1_11	c1_30		4	2.40823	0.333474	c1_30	c1_30	c1_11	c1_1		YES								YES																			YES
GGH	c1_2	c1_5	c1_27		3	1.93447	1	c1_27	c1_27	c1_27	c1_1	YES			YES																						YES
SEMA4B	c1_3	c1_9		3	1.84885	1	c1_9	c1_9	c1_9	c1_1		YES						YES
RXYLT1	c1_3	c1_11	c1_28	c1_47		3	1.68998	1	c1_47	c1_47	c1_11	c1_1		YES								YES																	YES
LRMDA	c1_3	c1_9		3	1.93166	1	c1_9	c1_9	c1_9	c1_1		YES						YES
SLC52A3	c1_2	c1_5	c1_22		3	1.65988	1	c1_22	c1_22	c1_22	c1_1	YES			YES																	YES
SLC41A1	c1_3	c1_9		1	0.631379	NaN	c1_9	c1_9	c1_9	c1_1		YES						YES
LOC110484159	c1_2	c1_4		2	1.22063	1	NA	c1_4	c1_4	c1_1	YES		YES
NDUFS6	c1_2	c1_5	c1_26		9	5.60422	0.389971	c1_26	c1_26	c1_26	c1_1	YES			YES																					YES
GRIA4	c1_2	c1_6		1	0.630579	NaN	c1_6	c1_6	c1_6	c1_1	YES				YES
FEN1	c1_3	c1_11	c1_28	c1_44	c1_64		5	3.27478	0.500687	c1_64	c1_44	c1_11	c1_1		YES								YES																	YES
LOC110481148	c1_3	c1_11	c1_29	c1_59		6	4.46154	0.616505	c1_59	c1_29	c1_11	c1_1		YES								YES																		YES
HGS	c1_3	c1_13	c1_37		3	1.77305	1	c1_37	c1_13	c1_13	c1_1		YES										YES																								YES
NXNL1	c1_3	c1_11	c1_28	c1_46	c1_66		4	2.71749	0.672763	c1_66	c1_46	c1_11	c1_1		YES								YES																	YES
LOC116184597	c1_2	c1_4	c1_15		3	1.67871	1	c1_15	c1_4	c1_4	c1_1	YES		YES											YES
LOC110469653	c1_2	c1_5		1	0.628736	NaN	NA	NA	NA	c1_1	YES			YES
LOC110480957	c1_2	c1_4	c1_15		5	3.51355	0.516936	c1_15	c1_4	c1_4	c1_1	YES		YES											YES
EIF5A2	c1_3	c1_11	c1_28		3	1.83091	0.671561	NA	NA	c1_11	c1_1		YES								YES																	YES
PRPF3	c1_2	c1_4	c1_14		3	2.0747	1	c1_14	c1_4	c1_4	c1_1	YES		YES										YES
BMS1	c1_3	c1_11	c1_28	c1_44	c1_64		4	2.71641	0.837635	c1_64	c1_44	c1_11	c1_1		YES								YES																	YES
ATP8B1	c1_3	c1_13	c1_38		3	1.68164	1	c1_38	c1_13	c1_13	c1_1		YES										YES																									YES
GRIK1	c1_3	c1_11	c1_28	c1_49		1	0.627048	NaN	c1_49	c1_49	c1_11	c1_1		YES								YES																	YES
RERG	c1_3	c1_13	c1_38		2	1.15356	1	c1_38	c1_13	c1_13	c1_1		YES										YES																									YES
TMEM35A	c1_3	c1_11	c1_28		2	1.27904	0	NA	NA	c1_11	c1_1		YES								YES																	YES
MCTS1	c1_2	c1_8		2	1.29571	1	c1_8	c1_8	c1_8	c1_1	YES						YES
AP1G1	c1_3	c1_11	c1_28	c1_44	c1_65	c1_72	c1_74		4	2.60434	0.523017	c1_74	c1_44	c1_11	c1_1		YES								YES																	YES
LOC110470965	c1_2	c1_4	c1_14		3	1.69636	1	c1_14	c1_4	c1_4	c1_1	YES		YES										YES
RASSF1	c1_2	c1_5	c1_25		1	0.625482	NaN	c1_25	c1_25	c1_25	c1_1	YES			YES																				YES
NLGN1	c1_2	c1_5	c1_26		5	3.34268	0.696648	c1_26	c1_26	c1_26	c1_1	YES			YES																					YES
DYNC1LI1	c1_3	c1_11	c1_28	c1_44	c1_64		5	3.61541	0.521382	c1_64	c1_44	c1_11	c1_1		YES								YES																	YES
ADGRF4	c1_3	c1_9		2	1.20984	0	c1_9	c1_9	c1_9	c1_1		YES						YES
KCNJ2	c1_3	c1_11	c1_29	c1_60	c1_68		2	1.19103	1	c1_68	c1_29	c1_11	c1_1		YES								YES																		YES
MYO1E	c1_3	c1_11	c1_29	c1_59		5	3.03705	0.529502	c1_59	c1_29	c1_11	c1_1		YES								YES																		YES
LOC110467865	c1_2	c1_4	c1_15		1	0.623221	NaN	c1_15	c1_4	c1_4	c1_1	YES		YES											YES
FOXO6	c1_3	c1_9		3	1.96824	1	c1_9	c1_9	c1_9	c1_1		YES						YES
RFNG	c1_3	c1_11	c1_32		3	1.97154	1	c1_32	c1_32	c1_11	c1_1		YES								YES																					YES
PTGDS	c1_2	c1_4	c1_15		1	0.622301	NaN	c1_15	c1_4	c1_4	c1_1	YES		YES											YES
SYCE3	c1_3	c1_11	c1_29	c1_59		2	1.21244	0	c1_59	c1_29	c1_11	c1_1		YES								YES																		YES
LOC110476621	c1_3	c1_11	c1_29	c1_59		3	2.06695	1	c1_59	c1_29	c1_11	c1_1		YES								YES																		YES
RPS3A	c1_3	c1_11	c1_28	c1_44	c1_65	c1_72	c1_75		3	1.67892	1	c1_75	c1_44	c1_11	c1_1		YES								YES																	YES
TAF1B	c1_2	c1_4	c1_15		2	1.18861	1	c1_15	c1_4	c1_4	c1_1	YES		YES											YES
LOC110481339	c1_3	c1_13	c1_37		2	1.14192	1	c1_37	c1_13	c1_13	c1_1		YES										YES																								YES
MGP	c1_2	c1_6		3	1.99641	1	c1_6	c1_6	c1_6	c1_1	YES				YES
CORIN	c1_2	c1_8		2	1.16412	1	c1_8	c1_8	c1_8	c1_1	YES						YES
TXNIP	c1_2	c1_4	c1_15		4	2.2459	0.845118	c1_15	c1_4	c1_4	c1_1	YES		YES											YES
BVES	c1_2	c1_5	c1_20	c1_43		4	2.3895	0.825678	c1_43	c1_20	c1_20	c1_1	YES			YES															YES
SNCA	c1_3	c1_11	c1_29	c1_60	c1_68		2	1.37121	1	c1_68	c1_29	c1_11	c1_1		YES								YES																		YES
STAT1	c1_3	c1_11	c1_28	c1_44	c1_64		3	2.12467	1	c1_64	c1_44	c1_11	c1_1		YES								YES																	YES
DIAPH2	c1_2	c1_5	c1_20	c1_42		3	1.87105	1	c1_42	c1_20	c1_20	c1_1	YES			YES															YES
PRAG1	c1_2	c1_4	c1_15		3	2.01623	1	c1_15	c1_4	c1_4	c1_1	YES		YES											YES
PDE4C	c1_3	c1_11	c1_31		1	0.616857	NaN	c1_31	c1_31	c1_11	c1_1		YES								YES																				YES
GDNF	c1_3	c1_11	c1_28		2	1.14428	1	NA	NA	c1_11	c1_1		YES								YES																	YES
APOH	c1_2	c1_5	c1_27		3	1.64122	1	c1_27	c1_27	c1_27	c1_1	YES			YES																						YES
SLC25A1	c1_2		1	0.616132	NaN	NA	NA	NA	c1_1	YES
FLAD1	c1_3	c1_13	c1_38		3	1.88712	1	c1_38	c1_13	c1_13	c1_1		YES										YES																									YES
ANKFN1	c1_2	c1_4	c1_15		1	0.615764	NaN	c1_15	c1_4	c1_4	c1_1	YES		YES											YES
SENP1	c1_2	c1_4	c1_15		4	2.2636	0.520099	c1_15	c1_4	c1_4	c1_1	YES		YES											YES
PLPPR3	c1_3	c1_11	c1_28	c1_44	c1_64		3	1.70507	1	c1_64	c1_44	c1_11	c1_1		YES								YES																	YES
SH3D19	c1_2	c1_5	c1_25		5	3.15891	0.307939	c1_25	c1_25	c1_25	c1_1	YES			YES																				YES
GTDC1	c1_2	c1_5	c1_20	c1_42		1	0.614733	NaN	c1_42	c1_20	c1_20	c1_1	YES			YES															YES
LOC110477349	c1_3	c1_9		3	1.73203	1	c1_9	c1_9	c1_9	c1_1		YES						YES
ELMOD3	c1_3	c1_11	c1_28	c1_44	c1_65	c1_72	c1_75		5	3.39467	0.697845	c1_75	c1_44	c1_11	c1_1		YES								YES																	YES
LOC110470149	c1_2	c1_5	c1_25		3	1.84486	1	c1_25	c1_25	c1_25	c1_1	YES			YES																				YES
MOCS3	c1_3	c1_9		1	0.613917	NaN	c1_9	c1_9	c1_9	c1_1		YES						YES
TANGO6	c1_3	c1_9		4	2.65282	0.670741	c1_9	c1_9	c1_9	c1_1		YES						YES
LOC110474232	c1_3		2	1.11944	0	NA	NA	NA	c1_1		YES
CRIM1	c1_2	c1_4	c1_14		4	2.74147	0.671115	c1_14	c1_4	c1_4	c1_1	YES		YES										YES
ABCD3	c1_3	c1_11	c1_28		3	2.08568	1	NA	NA	c1_11	c1_1		YES								YES																	YES
SCYL3	c1_2	c1_4	c1_15		6	4.05614	0.601016	c1_15	c1_4	c1_4	c1_1	YES		YES											YES
TMEM141	c1_2	c1_5	c1_27		2	1.13337	1	c1_27	c1_27	c1_27	c1_1	YES			YES																						YES
CD24	c1_3	c1_11	c1_28	c1_46	c1_66		1	0.609673	NaN	c1_66	c1_46	c1_11	c1_1		YES								YES																	YES
C8H1orf112	c1_2	c1_4	c1_15		4	2.47293	0.842524	c1_15	c1_4	c1_4	c1_1	YES		YES											YES
ZDHHC23	c1_2	c1_4	c1_15		3	2.03563	1	c1_15	c1_4	c1_4	c1_1	YES		YES											YES
EYA2	c1_2	c1_5	c1_19	c1_39		1	0.608312	NaN	c1_39	c1_39	c1_39	c1_1	YES			YES														YES
ZNF513	c1_2	c1_4	c1_15		7	5.17885	0.524723	c1_15	c1_4	c1_4	c1_1	YES		YES											YES
CHRNA4	c1_2	c1_5	c1_19	c1_39		4	2.49505	0.842396	c1_39	c1_39	c1_39	c1_1	YES			YES														YES
MAN1A1	c1_2	c1_5	c1_19	c1_39		4	2.3083	0.850397	c1_39	c1_39	c1_39	c1_1	YES			YES														YES
DIP2C	c1_2	c1_5	c1_25		7	4.80626	0.527906	c1_25	c1_25	c1_25	c1_1	YES			YES																				YES
EGR2	c1_2	c1_5	c1_19	c1_39		4	2.69543	0.512653	c1_39	c1_39	c1_39	c1_1	YES			YES														YES
ZFYVE28	c1_2	c1_4	c1_15		3	1.87468	1	c1_15	c1_4	c1_4	c1_1	YES		YES											YES
KBTBD3	c1_3	c1_11	c1_28		2	1.09408	1	NA	NA	c1_11	c1_1		YES								YES																	YES
SLC25A10	c1_2	c1_4	c1_15		2	1.08939	1	c1_15	c1_4	c1_4	c1_1	YES		YES											YES
KITLG	c1_3	c1_11	c1_29	c1_60	c1_68		3	1.81848	1	c1_68	c1_29	c1_11	c1_1		YES								YES																		YES
VCL	c1_3	c1_11	c1_28	c1_44	c1_64		4	2.63268	0.680258	c1_64	c1_44	c1_11	c1_1		YES								YES																	YES
SMCHD1	c1_3	c1_11	c1_31		6	4.2574	0.617152	c1_31	c1_31	c1_11	c1_1		YES								YES																				YES
LOC116184088	c1_3	c1_11	c1_31		2	1.10855	1	c1_31	c1_31	c1_11	c1_1		YES								YES																				YES
TRAPPC11	c1_3	c1_13	c1_37		7	4.50312	0.482146	c1_37	c1_13	c1_13	c1_1		YES										YES																								YES
RBFOX2	c1_2	c1_4	c1_15		3	1.71672	0.684966	c1_15	c1_4	c1_4	c1_1	YES		YES											YES
PLAC8	c1_3	c1_11	c1_36		2	1.23037	0	c1_36	c1_36	c1_11	c1_1		YES								YES																									YES
ZFR	c1_3	c1_11	c1_28		1	0.599658	NaN	NA	NA	c1_11	c1_1		YES								YES																	YES
WRN	c1_2	c1_5	c1_22		4	2.539	0.837037	c1_22	c1_22	c1_22	c1_1	YES			YES																	YES
RHOBTB2	c1_2	c1_4	c1_14		8	5.32432	0.45159	c1_14	c1_4	c1_4	c1_1	YES		YES										YES
GLOD4	c1_3	c1_11	c1_28	c1_58		3	2.00017	1	c1_58	c1_58	c1_11	c1_1		YES								YES																	YES
NEK8	c1_2	c1_5	c1_21		2	1.0964	1	c1_21	c1_21	c1_21	c1_1	YES			YES																YES
CEP350	c1_2	c1_4	c1_14		5	2.95012	0.413379	c1_14	c1_4	c1_4	c1_1	YES		YES										YES
NOTCH2	c1_2	c1_5	c1_20	c1_41		3	1.81542	0.673148	c1_41	c1_20	c1_20	c1_1	YES			YES															YES
NPNT	c1_2	c1_5	c1_25		1	0.598386	NaN	c1_25	c1_25	c1_25	c1_1	YES			YES																				YES
QRFPR	c1_2	c1_5	c1_20	c1_41		2	1.15222	1	c1_41	c1_20	c1_20	c1_1	YES			YES															YES
LOC110480073	c1_2	c1_5	c1_19	c1_39		2	1.10752	1	c1_39	c1_39	c1_39	c1_1	YES			YES														YES
DACT1	c1_3	c1_11	c1_28	c1_44	c1_64		3	2.10342	1	c1_64	c1_44	c1_11	c1_1		YES								YES																	YES
LSM4	c1_3	c1_11	c1_28		1	0.596677	NaN	NA	NA	c1_11	c1_1		YES								YES																	YES
LOC110476798	c1_2	c1_5	c1_21	c1_21	5	3.01747	0.296858	c1_21	c1_21	c1_21	c1_1	YES			YES																YES
COL13A1	c1_2	c1_5	c1_20	c1_43		4	2.66346	0.837631	c1_43	c1_20	c1_20	c1_1	YES			YES															YES
ELOA	c1_2	c1_5	c1_25		3	1.6754	0.322167	c1_25	c1_25	c1_25	c1_1	YES			YES																				YES
MAPKBP1	c1_2	c1_5	c1_19	c1_40	c1_62	c1_70		6	4.31526	0.616191	c1_70	c1_40	c1_40	c1_1	YES			YES														YES
PTPN21	c1_3	c1_11	c1_28	c1_48		3	1.971	1	c1_48	c1_48	c1_11	c1_1		YES								YES																	YES
SFPQ	c1_2	c1_4	c1_15		1	0.594109	NaN	c1_15	c1_4	c1_4	c1_1	YES		YES											YES
C1QL3	c1_3	c1_11	c1_29	c1_59		1	0.593501	NaN	c1_59	c1_29	c1_11	c1_1		YES								YES																		YES
REC114	c1_2	c1_5	c1_19	c1_39		8	6.22455	0.482808	c1_39	c1_39	c1_39	c1_1	YES			YES														YES
BLZF1	c1_2	c1_4	c1_14		3	1.89269	1	c1_14	c1_4	c1_4	c1_1	YES		YES										YES
IP6K3	c1_2	c1_5	c1_24		3	1.66812	1	c1_24	c1_24	c1_24	c1_1	YES			YES																			YES
LOC110470225	c1_2	c1_4	c1_15		1	0.591461	NaN	c1_15	c1_4	c1_4	c1_1	YES		YES											YES
GOLT1B	c1_2	c1_5	c1_20		1	0.591329	NaN	NA	c1_20	c1_20	c1_1	YES			YES															YES
OMA1	c1_2	c1_4	c1_14		1	0.591115	NaN	c1_14	c1_4	c1_4	c1_1	YES		YES										YES
TAB1	c1_3	c1_11	c1_33		3	1.94478	1	c1_33	c1_33	c1_11	c1_1		YES								YES																						YES
IQGAP2	c1_3	c1_11	c1_29	c1_59		1	0.590854	NaN	c1_59	c1_29	c1_11	c1_1		YES								YES																		YES
ID2	c1_3	c1_13	c1_38		4	2.58657	0.333333	c1_38	c1_13	c1_13	c1_1		YES										YES																									YES
RPA1	c1_2	c1_4	c1_14		7	4.83988	0.491736	c1_14	c1_4	c1_4	c1_1	YES		YES										YES
RBM41	c1_2	c1_5	c1_25		1	0.587741	NaN	c1_25	c1_25	c1_25	c1_1	YES			YES																				YES
KLF15	c1_3	c1_13	c1_38		1	0.587144	NaN	c1_38	c1_13	c1_13	c1_1		YES										YES																									YES
HTRA2	c1_2	c1_5	c1_19	c1_40	c1_63		3	1.75848	1	c1_63	c1_40	c1_40	c1_1	YES			YES														YES
LOC110475037	c1_3	c1_9		4	2.1529	0.485263	c1_9	c1_9	c1_9	c1_1		YES						YES
SNED1	c1_2	c1_4	c1_14		7	4.49643	0.431744	c1_14	c1_4	c1_4	c1_1	YES		YES										YES
LOC110468601	c1_3	c1_11	c1_29	c1_60	c1_68		3	1.81775	1	c1_68	c1_29	c1_11	c1_1		YES								YES																		YES
GOLPH3L	c1_2	c1_4	c1_15		1	0.584323	NaN	c1_15	c1_4	c1_4	c1_1	YES		YES											YES
GLG1	c1_2	c1_4	c1_14		8	5.76917	0.481948	c1_14	c1_4	c1_4	c1_1	YES		YES										YES
LYRM1	c1_2	c1_5	c1_24		5	2.81361	0.520098	c1_24	c1_24	c1_24	c1_1	YES			YES																			YES
SRGN	c1_2	c1_4	c1_14		6	3.21916	0.596761	c1_14	c1_4	c1_4	c1_1	YES		YES										YES
AEBP1	c1_3	c1_11	c1_28		1	0.583026	NaN	NA	NA	c1_11	c1_1		YES								YES																	YES
NEK9	c1_3	c1_11	c1_31		1	0.582016	NaN	c1_31	c1_31	c1_11	c1_1		YES								YES																				YES
TNPO1	c1_3	c1_11	c1_28	c1_46	c1_66		1	0.581391	NaN	c1_66	c1_46	c1_11	c1_1		YES								YES																	YES
ZBTB5	c1_3	c1_11	c1_28		2	1.11306	1	NA	NA	c1_11	c1_1		YES								YES																	YES
YTHDF1	c1_2	c1_5	c1_22		1	0.57958	NaN	c1_22	c1_22	c1_22	c1_1	YES			YES																	YES
CPLX2	c1_3	c1_9		9	6.8979	0.364758	c1_9	c1_9	c1_9	c1_1		YES						YES
AASDH	c1_2	c1_6		2	1.09111	1	c1_6	c1_6	c1_6	c1_1	YES				YES
KDM5A	c1_3	c1_11	c1_29	c1_59		3	1.76158	1	c1_59	c1_29	c1_11	c1_1		YES								YES																		YES
BIN3	c1_2	c1_5	c1_26		1	0.578052	NaN	c1_26	c1_26	c1_26	c1_1	YES			YES																					YES
ATF7IP	c1_3	c1_13	c1_37		3	1.70159	0.33026	c1_37	c1_13	c1_13	c1_1		YES										YES																								YES
LOC110477548	c1_3	c1_11	c1_28	c1_44	c1_64		1	0.577343	NaN	c1_64	c1_44	c1_11	c1_1		YES								YES																	YES
LOC110473024	c1_3	c1_9		4	2.90377	0.850479	c1_9	c1_9	c1_9	c1_1		YES						YES
TNNC1	c1_3	c1_12		1	0.576207	NaN	c1_12	c1_12	c1_12	c1_1		YES									YES
SPOCK3	c1_3	c1_13	c1_37		5	2.81646	0.601241	c1_37	c1_13	c1_13	c1_1		YES										YES																								YES
PLPP3	c1_3	c1_11	c1_28		1	0.575675	NaN	NA	NA	c1_11	c1_1		YES								YES																	YES
LOC110484266	c1_3	c1_11	c1_30		3	1.74629	0	c1_30	c1_30	c1_11	c1_1		YES								YES																			YES
OTX1	c1_3	c1_11	c1_28	c1_44	c1_65	c1_72	c1_75		3	1.85782	1	c1_75	c1_44	c1_11	c1_1		YES								YES																	YES
MORN4	c1_2	c1_4	c1_15		2	1.10244	1	c1_15	c1_4	c1_4	c1_1	YES		YES											YES
EFNA2	c1_3	c1_11	c1_32		3	1.65103	0.337447	c1_32	c1_32	c1_11	c1_1		YES								YES																					YES
PLCH2	c1_3	c1_11		3	1.82076	1	NA	NA	c1_11	c1_1		YES								YES
CCDC28A	c1_3	c1_11	c1_30		2	1.07055	1	c1_30	c1_30	c1_11	c1_1		YES								YES																			YES
CCP110	c1_2	c1_5	c1_19	c1_39		3	1.96244	1	c1_39	c1_39	c1_39	c1_1	YES			YES														YES
ROBO2	c1_2	c1_5	c1_22		3	1.74712	1	c1_22	c1_22	c1_22	c1_1	YES			YES																	YES
TSHZ3	c1_2	c1_5	c1_20	c1_42		4	2.57391	0.833112	c1_42	c1_20	c1_20	c1_1	YES			YES															YES
LRRK2	c1_2	c1_5	c1_27		1	0.569422	NaN	c1_27	c1_27	c1_27	c1_1	YES			YES																						YES
GPR78	c1_2	c1_5	c1_19	c1_39		3	1.70545	1	c1_39	c1_39	c1_39	c1_1	YES			YES														YES
TRAPPC13	c1_2	c1_4	c1_15		3	1.79363	1	c1_15	c1_4	c1_4	c1_1	YES		YES											YES
HMG20A	c1_2	c1_5	c1_19	c1_39		4	2.40439	0.509737	c1_39	c1_39	c1_39	c1_1	YES			YES														YES
NEO1	c1_3	c1_11	c1_28	c1_45		2	1.24244	1	c1_45	c1_45	c1_11	c1_1		YES								YES																	YES
LTBP2	c1_2	c1_5	c1_20	c1_41		1	0.565065	NaN	c1_41	c1_20	c1_20	c1_1	YES			YES															YES
LOC110472217	c1_2	c1_4	c1_15		3	1.72606	0.319733	c1_15	c1_4	c1_4	c1_1	YES		YES											YES
LGI3	c1_3	c1_11	c1_31		2	1.18128	0	c1_31	c1_31	c1_11	c1_1		YES								YES																				YES
PPCDC	c1_2	c1_4	c1_14		2	1.2396	1	c1_14	c1_4	c1_4	c1_1	YES		YES										YES
LOC110477109	c1_2	c1_4	c1_18		3	1.74617	1	c1_18	c1_4	c1_4	c1_1	YES		YES														YES
POMT1	c1_3	c1_11	c1_28		1	0.561168	NaN	NA	NA	c1_11	c1_1		YES								YES																	YES
CCDC61	c1_2	c1_8		3	1.6401	1	c1_8	c1_8	c1_8	c1_1	YES						YES
SLC35F1	c1_2	c1_5	c1_19	c1_39		3	1.99645	1	c1_39	c1_39	c1_39	c1_1	YES			YES														YES
VPS8	c1_3	c1_11	c1_28	c1_44	c1_64		4	2.29905	0.842302	c1_64	c1_44	c1_11	c1_1		YES								YES																	YES
KIAA0895L	c1_2	c1_5	c1_26		5	2.73241	0.613711	c1_26	c1_26	c1_26	c1_1	YES			YES																					YES
ZFX	c1_3	c1_11	c1_28		1	0.558273	NaN	NA	NA	c1_11	c1_1		YES								YES																	YES
PLD4	c1_2	c1_4	c1_15		6	4.02369	0.603732	c1_15	c1_4	c1_4	c1_1	YES		YES											YES
LOC116183891	c1_2	c1_4	c1_14		3	1.72045	0.338061	c1_14	c1_4	c1_4	c1_1	YES		YES										YES
PHACTR2	c1_3	c1_11	c1_29	c1_60		4	2.44262	0.488449	NA	c1_29	c1_11	c1_1		YES								YES																		YES
GNL3	c1_2	c1_5	c1_20	c1_42		2	1.2678	1	c1_42	c1_20	c1_20	c1_1	YES			YES															YES
PDCD2	c1_3	c1_13	c1_37		3	1.66707	1	c1_37	c1_13	c1_13	c1_1		YES										YES																								YES
UGGT2	c1_3	c1_11	c1_28		1	0.553098	NaN	NA	NA	c1_11	c1_1		YES								YES																	YES
ATF3	c1_3	c1_11	c1_28	c1_58		3	1.68833	1	c1_58	c1_58	c1_11	c1_1		YES								YES																	YES
LOC110467862	c1_2	c1_4	c1_14		8	6.05069	0.450608	c1_14	c1_4	c1_4	c1_1	YES		YES										YES
DPY30	c1_3	c1_9		3	1.71874	1	c1_9	c1_9	c1_9	c1_1		YES						YES
SHISAL1	c1_3	c1_11	c1_29	c1_59		3	1.9218	0.676492	c1_59	c1_29	c1_11	c1_1		YES								YES																		YES
GPHN	c1_3	c1_13	c1_37		3	1.70211	0.35922	c1_37	c1_13	c1_13	c1_1		YES										YES																								YES
EMSY	c1_2	c1_5	c1_20	c1_42		2	1.24294	1	c1_42	c1_20	c1_20	c1_1	YES			YES															YES
KCNRG	c1_3	c1_11	c1_28	c1_44	c1_65	c1_73		4	2.53883	0.5003	c1_73	c1_44	c1_11	c1_1		YES								YES																	YES
FOXC2	c1_3	c1_11	c1_28		1	0.547878	NaN	NA	NA	c1_11	c1_1		YES								YES																	YES
LOC110479075	c1_2	c1_8		2	1.1094	1	c1_8	c1_8	c1_8	c1_1	YES						YES
INSR	c1_2	c1_4	c1_15		1	0.545659	NaN	c1_15	c1_4	c1_4	c1_1	YES		YES											YES
MRPL42	c1_3	c1_11	c1_30		3	1.67639	0.662572	c1_30	c1_30	c1_11	c1_1		YES								YES																			YES
TAFA2	c1_3	c1_11	c1_29	c1_60	c1_68		4	2.32978	0.845511	c1_68	c1_29	c1_11	c1_1		YES								YES																		YES
LOC110467630	c1_3	c1_11	c1_31		1	0.543953	NaN	c1_31	c1_31	c1_11	c1_1		YES								YES																				YES
URI1	c1_3	c1_11	c1_28	c1_48		5	3.17759	0.598502	c1_48	c1_48	c1_11	c1_1		YES								YES																	YES
RAC2	c1_2	c1_4	c1_15		4	2.41861	0.484104	c1_15	c1_4	c1_4	c1_1	YES		YES											YES
LOC110483172	c1_3	c1_11		2	1.25149	1	NA	NA	c1_11	c1_1		YES								YES
B3GLCT	c1_2	c1_4	c1_14		3	1.81311	1	c1_14	c1_4	c1_4	c1_1	YES		YES										YES
RPS6KA5	c1_2	c1_4	c1_14		3	1.90021	0.685298	c1_14	c1_4	c1_4	c1_1	YES		YES										YES
LOC110482680	c1_3	c1_11	c1_29	c1_60		1	0.541135	NaN	NA	c1_29	c1_11	c1_1		YES								YES																		YES
KIAA0100	c1_2	c1_5	c1_25		7	4.69363	0.49615	c1_25	c1_25	c1_25	c1_1	YES			YES																				YES
HSPB7	c1_2	c1_5	c1_22		3	1.75929	1	c1_22	c1_22	c1_22	c1_1	YES			YES																	YES
INHBB	c1_3	c1_11	c1_29	c1_59		2	1.27345	1	c1_59	c1_29	c1_11	c1_1		YES								YES																		YES
STN1	c1_3	c1_11	c1_32		3	1.85469	1	c1_32	c1_32	c1_11	c1_1		YES								YES																					YES
TMEM229B	c1_2	c1_4	c1_14		4	2.38562	0.694059	c1_14	c1_4	c1_4	c1_1	YES		YES										YES
LOC110469434	c1_2	c1_5	c1_19	c1_40	c1_62	c1_71		3	1.69319	1	c1_71	c1_40	c1_40	c1_1	YES			YES														YES
NANOS1	c1_3	c1_11	c1_28	c1_44	c1_65	c1_72	c1_74		3	1.75677	1	c1_74	c1_44	c1_11	c1_1		YES								YES																	YES
IDE	c1_3	c1_11	c1_28	c1_44	c1_65		4	2.68826	0.849117	NA	c1_44	c1_11	c1_1		YES								YES																	YES
GPER1	c1_2	c1_5	c1_24		3	1.58135	0.674493	c1_24	c1_24	c1_24	c1_1	YES			YES																			YES
LPCAT3	c1_2		1	0.528212	NaN	NA	NA	NA	c1_1	YES
CCDC59	c1_3	c1_11	c1_28	c1_58		4	2.25658	0.516888	c1_58	c1_58	c1_11	c1_1		YES								YES																	YES
DZANK1	c1_3	c1_13	c1_37		2	1.14974	1	c1_37	c1_13	c1_13	c1_1		YES										YES																								YES
LOC110480163	c1_2	c1_5	c1_25		2	1.18778	1	c1_25	c1_25	c1_25	c1_1	YES			YES																				YES
LMO2	c1_2	c1_4	c1_14		5	3.05114	0.707848	c1_14	c1_4	c1_4	c1_1	YES		YES										YES
PPM1B	c1_3	c1_11	c1_28	c1_44	c1_64		5	3.22901	0.71857	c1_64	c1_44	c1_11	c1_1		YES								YES																	YES
ZC3H7B	c1_3	c1_13	c1_37		3	1.78954	1	c1_37	c1_13	c1_13	c1_1		YES										YES																								YES
UBN1	c1_3	c1_11	c1_29	c1_59		2	1.16131	1	c1_59	c1_29	c1_11	c1_1		YES								YES																		YES
NUP133	c1_2	c1_5		1	0.516557	NaN	NA	NA	NA	c1_1	YES			YES
CRB1	c1_3	c1_11	c1_29	c1_60		3	1.51041	0	NA	c1_29	c1_11	c1_1		YES								YES																		YES
NYX	c1_2	c1_5	c1_26		2	1.14202	1	c1_26	c1_26	c1_26	c1_1	YES			YES																					YES
PTPRJ	c1_3	c1_11	c1_29	c1_59		1	0.513733	NaN	c1_59	c1_29	c1_11	c1_1		YES								YES																		YES
LOC110483165	c1_3	c1_9		2	1.18273	1	c1_9	c1_9	c1_9	c1_1		YES						YES
LOC110468346	c1_2	c1_4	c1_15		2	1.20043	1	c1_15	c1_4	c1_4	c1_1	YES		YES											YES
ATRNL1	c1_3	c1_11	c1_28	c1_44	c1_65		3	1.99501	1	NA	c1_44	c1_11	c1_1		YES								YES																	YES
FAM13A	c1_3	c1_10		3	1.82904	1	c1_10	c1_10	c1_10	c1_1		YES							YES
LOC110478085	c1_3	c1_11	c1_28	c1_58		1	0.506983	NaN	c1_58	c1_58	c1_11	c1_1		YES								YES																	YES
SEMA6D	c1_2	c1_5	c1_20	c1_42		2	1.09348	1	c1_42	c1_20	c1_20	c1_1	YES			YES															YES
LOC116184582	c1_3		1	0.506629	NaN	NA	NA	NA	c1_1		YES
GNE	c1_2	c1_4	c1_15		5	2.95336	0.601934	c1_15	c1_4	c1_4	c1_1	YES		YES											YES
ADGRL4	c1_2	c1_5	c1_23		2	1.07491	1	c1_23	c1_23	c1_23	c1_1	YES			YES																		YES
PGP	c1_2	c1_4	c1_14		4	2.38025	0.82985	c1_14	c1_4	c1_4	c1_1	YES		YES										YES
DCTN1	c1_3	c1_11		2	1.21559	1	NA	NA	c1_11	c1_1		YES								YES
TSC2	c1_3	c1_13	c1_37		1	0.500258	NaN	c1_37	c1_13	c1_13	c1_1		YES										YES																								YES
C1AH12orf75	c1_3	c1_11	c1_29	c1_59		2	1.11956	1	c1_59	c1_29	c1_11	c1_1		YES								YES																		YES
RASL11B	c1_3	c1_9		2	1.09126	1	c1_9	c1_9	c1_9	c1_1		YES						YES
AARS1	c1_2	c1_5	c1_27		2	1.15962	1	c1_27	c1_27	c1_27	c1_1	YES			YES																						YES
LOC110467588	c1_3	c1_11	c1_28	c1_44	c1_65	c1_72	c1_74		4	2.52606	0.831087	c1_74	c1_44	c1_11	c1_1		YES								YES																	YES
NKX6-2	c1_2	c1_6		3	1.71042	0.699809	c1_6	c1_6	c1_6	c1_1	YES				YES
EPHB6	c1_3	c1_11		2	1.1468	1	NA	NA	c1_11	c1_1		YES								YES
TMEM179	c1_2	c1_5	c1_20	c1_41		4	2.2389	0.490589	c1_41	c1_20	c1_20	c1_1	YES			YES															YES
JKAMP	c1_3	c1_9		3	1.86781	0.335659	c1_9	c1_9	c1_9	c1_1		YES						YES
FYN	c1_3	c1_11	c1_29	c1_59		2	1.18	1	c1_59	c1_29	c1_11	c1_1		YES								YES																		YES
MSANTD4	c1_3	c1_11	c1_30		3	1.60063	1	c1_30	c1_30	c1_11	c1_1		YES								YES																			YES
DNM2	c1_2	c1_4		4	2.28289	0.486739	NA	c1_4	c1_4	c1_1	YES		YES
PRLR	c1_3	c1_11	c1_35		2	1.22188	1	c1_35	c1_35	c1_11	c1_1		YES								YES																								YES
LOC110476475	c1_2	c1_4	c1_15		2	1.16481	1	c1_15	c1_4	c1_4	c1_1	YES		YES											YES
STON1	c1_3	c1_11	c1_28	c1_56		2	1.08042	1	c1_56	c1_56	c1_11	c1_1		YES								YES																	YES
NKIRAS1	c1_2	c1_5	c1_20	c1_41		4	3.21864	0.847871	c1_41	c1_20	c1_20	c1_1	YES			YES															YES
LOC110476390	c1_3	c1_9		6	4.96531	0.617814	c1_9	c1_9	c1_9	c1_1		YES						YES
RPL30	c1_3	c1_9		9	7.03005	0.41067	c1_9	c1_9	c1_9	c1_1		YES						YES
RPS17	c1_3	c1_9		7	5.67931	0.537737	c1_9	c1_9	c1_9	c1_1		YES						YES
LOC110471349	c1_2	c1_5	c1_19	c1_39		13	11.0341	0.284735	c1_39	c1_39	c1_39	c1_1	YES			YES														YES
JADE2	c1_2	c1_5	c1_19	c1_39		13	10.2595	0.302243	c1_39	c1_39	c1_39	c1_1	YES			YES														YES
PHYHIPL	c1_3	c1_11	c1_28	c1_44	c1_64		6	4.78367	0.61025	c1_64	c1_44	c1_11	c1_1		YES								YES																	YES
BASP1	c1_3	c1_11	c1_28	c1_44	c1_65	c1_73	c1_1	c1_3	c1_11	c1_28	17	12.4401	0.229346	c1_73	c1_44	c1_11	c1_1		YES								YES																	YES
MTSS1	c1_3	c1_11	c1_28	c1_44	c1_64		6	4.5003	0.616688	c1_64	c1_44	c1_11	c1_1		YES								YES																	YES
SDC2	c1_3	c1_13	c1_37		6	4.68407	0.596104	c1_37	c1_13	c1_13	c1_1		YES										YES																								YES
NPM1	c1_3	c1_11	c1_28	c1_44	c1_64		8	6.19212	0.475462	c1_64	c1_44	c1_11	c1_1		YES								YES																	YES
ICE1	c1_3	c1_11	c1_28	c1_44	c1_64		5	3.96652	0.709586	c1_64	c1_44	c1_11	c1_1		YES								YES																	YES
ACE	c1_2	c1_5	c1_19	c1_40	c1_62	c1_70	c1_1	c1_2	c1_5	17	12.8672	0.219487	c1_70	c1_40	c1_40	c1_1	YES			YES														YES
TKFC	c1_2	c1_4	c1_14		12	8.61781	0.314852	c1_14	c1_4	c1_4	c1_1	YES		YES										YES
TRIL	c1_2	c1_5	c1_19	c1_39		3	2.4621	1	c1_39	c1_39	c1_39	c1_1	YES			YES														YES
SPOCK1	c1_3	c1_11	c1_28	c1_44	c1_65	c1_73		3	2.34594	1	c1_73	c1_44	c1_11	c1_1		YES								YES																	YES
UBE2D2	c1_2	c1_5	c1_19	c1_39		14	10.8367	0.282709	c1_39	c1_39	c1_39	c1_1	YES			YES														YES
MYO10	c1_3	c1_11	c1_28	c1_57		3	2.11357	1	c1_57	c1_57	c1_11	c1_1		YES								YES																	YES
FSTL5	c1_3	c1_11	c1_28	c1_44	c1_65	c1_72	c1_75		4	3.25518	0.840533	c1_75	c1_44	c1_11	c1_1		YES								YES																	YES
HIPK3	c1_2	c1_5	c1_25		7	5.18101	0.496862	c1_25	c1_25	c1_25	c1_1	YES			YES																				YES
IGFBP4	c1_2	c1_4	c1_14		7	4.77098	0.538948	c1_14	c1_4	c1_4	c1_1	YES		YES										YES
SSTR1	c1_3	c1_10		4	3.11569	0.847797	c1_10	c1_10	c1_10	c1_1		YES							YES
EPOP	c1_3	c1_11	c1_28		9	6.51058	0.431231	NA	NA	c1_11	c1_1		YES								YES																	YES
SNTG1	c1_3	c1_11	c1_28	c1_44	c1_64		7	5.32773	0.535819	c1_64	c1_44	c1_11	c1_1		YES								YES																	YES
THRB	c1_3	c1_11	c1_28	c1_44	c1_65	c1_72	c1_74		6	4.82134	0.606995	c1_74	c1_44	c1_11	c1_1		YES								YES																	YES
LANCL2	c1_3	c1_11	c1_28	c1_44	c1_64		7	5.51777	0.529675	c1_64	c1_44	c1_11	c1_1		YES								YES																	YES
CTTN	c1_2	c1_5	c1_20	c1_42		4	3.07696	0.833596	c1_42	c1_20	c1_20	c1_1	YES			YES															YES
LOC110470892	c1_3	c1_10		8	6.21617	0.46359	c1_10	c1_10	c1_10	c1_1		YES							YES
LPCAT1	c1_3	c1_11	c1_28	c1_44	c1_65	c1_72	c1_74		4	2.98162	0.835745	c1_74	c1_44	c1_11	c1_1		YES								YES																	YES
MIA3	c1_3	c1_11	c1_28	c1_44	c1_65	c1_73		4	3.29132	0.834403	c1_73	c1_44	c1_11	c1_1		YES								YES																	YES
MMP16	c1_2	c1_5	c1_20	c1_43		3	2.29571	1	c1_43	c1_20	c1_20	c1_1	YES			YES															YES
ARC	c1_3	c1_11	c1_28	c1_44	c1_65	c1_72	c1_75		10	7.57523	0.391018	c1_75	c1_44	c1_11	c1_1		YES								YES																	YES
ERG28	c1_3	c1_11	c1_28	c1_44	c1_64		5	4.03471	0.703329	c1_64	c1_44	c1_11	c1_1		YES								YES																	YES
PGAP3	c1_3	c1_9		6	4.37642	0.550871	c1_9	c1_9	c1_9	c1_1		YES						YES
CDK12	c1_2	c1_4	c1_14	c1_1	c1_2	15	11.1744	0.212176	c1_14	c1_4	c1_4	c1_1	YES		YES										YES
STC2	c1_2	c1_5	c1_19	c1_39	c1_1	c1_2	c1_5	19	13.5386	0.211459	c1_39	c1_39	c1_39	c1_1	YES			YES														YES
PNN	c1_3	c1_11	c1_28	c1_44	c1_64		7	5.32711	0.537387	c1_64	c1_44	c1_11	c1_1		YES								YES																	YES
TMEM42	c1_3	c1_11	c1_29	c1_59		3	2.23932	1	c1_59	c1_29	c1_11	c1_1		YES								YES																		YES
LOC110470798	c1_3	c1_11	c1_28	c1_44	c1_65	c1_72	c1_74		6	4.645	0.610691	c1_74	c1_44	c1_11	c1_1		YES								YES																	YES
MLX	c1_3	c1_11	c1_28	c1_44	c1_64		5	3.62491	0.71084	c1_64	c1_44	c1_11	c1_1		YES								YES																	YES
PLXDC2	c1_3	c1_11	c1_28	c1_44	c1_64		8	5.83951	0.43936	c1_64	c1_44	c1_11	c1_1		YES								YES																	YES
COLEC10	c1_3	c1_11	c1_28	c1_44	c1_64		6	4.2028	0.558699	c1_64	c1_44	c1_11	c1_1		YES								YES																	YES
MESD	c1_3	c1_11	c1_31		3	2.15757	1	c1_31	c1_31	c1_11	c1_1		YES								YES																				YES
UBXN2A	c1_3	c1_11	c1_28	c1_44	c1_64		4	3.09041	0.830557	c1_64	c1_44	c1_11	c1_1		YES								YES																	YES
UNC119	c1_3	c1_11	c1_28	c1_44	c1_65	c1_72	c1_74		8	5.8822	0.473855	c1_74	c1_44	c1_11	c1_1		YES								YES																	YES
LRRC6	c1_3	c1_11	c1_29	c1_59		5	3.765	0.695049	c1_59	c1_29	c1_11	c1_1		YES								YES																		YES
PDGFRB	c1_2	c1_4	c1_15	c1_1	c1_2	c1_4	15	10.8636	0.256461	c1_15	c1_4	c1_4	c1_1	YES		YES											YES
ATXN3	c1_2	c1_5	c1_19	c1_39		7	4.80389	0.542473	c1_39	c1_39	c1_39	c1_1	YES			YES														YES
LOC110471335	c1_3	c1_11	c1_28	c1_44	c1_65	c1_72	c1_74		3	2.3873	1	c1_74	c1_44	c1_11	c1_1		YES								YES																	YES
PTP4A3	c1_2	c1_5	c1_20	c1_41		6	4.44677	0.60972	c1_41	c1_20	c1_20	c1_1	YES			YES															YES
TSPAN13	c1_3	c1_11	c1_28	c1_46	c1_66		12	8.67721	0.325084	c1_66	c1_46	c1_11	c1_1		YES								YES																	YES
MSL1	c1_3	c1_11	c1_28	c1_44	c1_65	c1_72	c1_74		4	2.95502	0.847081	c1_74	c1_44	c1_11	c1_1		YES								YES																	YES
FBXO34	c1_3	c1_11	c1_28	c1_44	c1_64		8	5.84127	0.475022	c1_64	c1_44	c1_11	c1_1		YES								YES																	YES
SCG2	c1_3	c1_11	c1_28	c1_44	c1_65	c1_72	c1_74		5	3.69918	0.705102	c1_74	c1_44	c1_11	c1_1		YES								YES																	YES
LOC110470707	c1_2	c1_4	c1_14		4	3.08281	0.831121	c1_14	c1_4	c1_4	c1_1	YES		YES										YES
ELOC	c1_3	c1_11	c1_30		7	4.67479	0.495462	c1_30	c1_30	c1_11	c1_1		YES								YES																			YES
LRRC4B	c1_3	c1_11	c1_28	c1_44	c1_64		12	8.72896	0.32597	c1_64	c1_44	c1_11	c1_1		YES								YES																	YES
TMEM64	c1_3	c1_11	c1_28	c1_44	c1_65	c1_72	c1_74		14	10.4433	0.280452	c1_74	c1_44	c1_11	c1_1		YES								YES																	YES
EGR1	c1_3	c1_11	c1_29	c1_59		3	2.39172	1	c1_59	c1_29	c1_11	c1_1		YES								YES																		YES
REEP2	c1_2	c1_5	c1_19	c1_39		3	2.35081	1	c1_39	c1_39	c1_39	c1_1	YES			YES														YES
ROCK1	c1_3	c1_11	c1_28	c1_44	c1_65	c1_72	c1_74		6	4.51501	0.605007	c1_74	c1_44	c1_11	c1_1		YES								YES																	YES
LOC110468465	c1_3	c1_11	c1_28	c1_44	c1_65	c1_73		3	2.3271	1	c1_73	c1_44	c1_11	c1_1		YES								YES																	YES
TMEM248	c1_2	c1_5	c1_19	c1_39		4	3.02591	0.843066	c1_39	c1_39	c1_39	c1_1	YES			YES														YES
ILKAP	c1_3	c1_11	c1_29	c1_59		4	3.05774	0.839233	c1_59	c1_29	c1_11	c1_1		YES								YES																		YES
ADCYAP1	c1_3	c1_11	c1_28	c1_44	c1_65	c1_72	c1_74		8	6.01617	0.473347	c1_74	c1_44	c1_11	c1_1		YES								YES																	YES
HEY1	c1_3	c1_10		8	5.98459	0.472676	c1_10	c1_10	c1_10	c1_1		YES							YES
RPP38	c1_3	c1_11	c1_28	c1_44	c1_64		4	3.05246	0.834298	c1_64	c1_44	c1_11	c1_1		YES								YES																	YES
SAP30L	c1_2	c1_5	c1_19	c1_39		4	2.89112	0.846279	c1_39	c1_39	c1_39	c1_1	YES			YES														YES
LOC110482748	c1_2	c1_4	c1_14		11	7.94997	0.296255	c1_14	c1_4	c1_4	c1_1	YES		YES										YES
FNDC9	c1_2	c1_5	c1_27		4	2.98173	0.834912	c1_27	c1_27	c1_27	c1_1	YES			YES																						YES
ABHD3	c1_3	c1_10		6	4.11733	0.616114	c1_10	c1_10	c1_10	c1_1		YES							YES
DEGS1	c1_3	c1_13	c1_37		4	3.1471	0.837858	c1_37	c1_13	c1_13	c1_1		YES										YES																								YES
DDX17	c1_2	c1_5	c1_25		4	3.05751	0.843192	c1_25	c1_25	c1_25	c1_1	YES			YES																				YES
FAM13B	c1_3	c1_11	c1_28	c1_44	c1_65	c1_72	c1_74		9	6.14193	0.427728	c1_74	c1_44	c1_11	c1_1		YES								YES																	YES
NCALD	c1_3	c1_11	c1_28	c1_44	c1_64		9	5.91014	0.373941	c1_64	c1_44	c1_11	c1_1		YES								YES																	YES
AMBRA1	c1_3	c1_11	c1_29	c1_59		3	2.07996	1	c1_59	c1_29	c1_11	c1_1		YES								YES																		YES
IMPA1	c1_2	c1_5	c1_19	c1_39		4	2.94188	0.848997	c1_39	c1_39	c1_39	c1_1	YES			YES														YES
ZNF622	c1_3	c1_11	c1_28	c1_44	c1_65	c1_72	c1_74		3	2.3315	1	c1_74	c1_44	c1_11	c1_1		YES								YES																	YES
PID1	c1_2	c1_4	c1_15		3	2.14479	1	c1_15	c1_4	c1_4	c1_1	YES		YES											YES
THAP5	c1_2	c1_4	c1_14		6	4.61012	0.467207	c1_14	c1_4	c1_4	c1_1	YES		YES										YES
CCNY	c1_3	c1_11	c1_28	c1_44	c1_64		4	2.9461	0.515364	c1_64	c1_44	c1_11	c1_1		YES								YES																	YES
MED6	c1_2	c1_4	c1_14		6	4.17472	0.554793	c1_14	c1_4	c1_4	c1_1	YES		YES										YES
BRSK2	c1_3	c1_11	c1_28	c1_44	c1_65	c1_73		3	2.1653	1	c1_73	c1_44	c1_11	c1_1		YES								YES																	YES
CWC25	c1_3	c1_11	c1_28	c1_44	c1_65	c1_72	c1_74		6	4.18916	0.611348	c1_74	c1_44	c1_11	c1_1		YES								YES																	YES
PGLS	c1_3	c1_11	c1_34		7	4.96968	0.53465	c1_34	c1_34	c1_11	c1_1		YES								YES																							YES
PSMD13	c1_2	c1_5	c1_25		5	3.6415	0.692567	c1_25	c1_25	c1_25	c1_1	YES			YES																				YES
THNSL1	c1_2	c1_4	c1_14		4	2.97191	0.835111	c1_14	c1_4	c1_4	c1_1	YES		YES										YES
KIF13A	c1_3	c1_11	c1_28		3	2.29494	1	NA	NA	c1_11	c1_1		YES								YES																	YES
LONRF3	c1_3	c1_11	c1_28	c1_44	c1_65	c1_72	c1_74		3	2.15037	1	c1_74	c1_44	c1_11	c1_1		YES								YES																	YES
IL34	c1_2	c1_5	c1_19	c1_39		3	2.11976	1	c1_39	c1_39	c1_39	c1_1	YES			YES														YES
WASHC5	c1_3	c1_11	c1_28	c1_44	c1_64		4	2.93618	0.841468	c1_64	c1_44	c1_11	c1_1		YES								YES																	YES
SLC25A29	c1_3	c1_11	c1_28	c1_44	c1_65	c1_73		3	2.06743	1	c1_73	c1_44	c1_11	c1_1		YES								YES																	YES
LRRTM2	c1_3	c1_9		5	3.56456	0.608559	c1_9	c1_9	c1_9	c1_1		YES						YES
DEK	c1_3	c1_11	c1_28	c1_44	c1_65	c1_72	c1_74		4	2.99987	0.839688	c1_74	c1_44	c1_11	c1_1		YES								YES																	YES
ACSL6	c1_2	c1_5	c1_20	c1_42		4	3.0484	0.835975	c1_42	c1_20	c1_20	c1_1	YES			YES															YES
TCF7L2	c1_3	c1_11	c1_28		4	2.88115	0.839993	NA	NA	c1_11	c1_1		YES								YES																	YES
LRGUK	c1_3	c1_11	c1_28	c1_44	c1_65	c1_72	c1_75		3	2.10486	1	c1_75	c1_44	c1_11	c1_1		YES								YES																	YES
ARHGAP6	c1_3	c1_11	c1_28	c1_44	c1_65	c1_72	c1_74		3	2.01131	1	c1_74	c1_44	c1_11	c1_1		YES								YES																	YES
C13H5orf15	c1_3	c1_11	c1_28	c1_52		3	2.21437	1	c1_52	c1_52	c1_11	c1_1		YES								YES																	YES
CLASP2	c1_3	c1_11	c1_28	c1_44	c1_65	c1_72	c1_74		7	4.86996	0.534494	c1_74	c1_44	c1_11	c1_1		YES								YES																	YES
WDR19	c1_3	c1_11	c1_28	c1_53	c1_53	4	2.57936	0.853406	c1_53	c1_53	c1_11	c1_1		YES								YES																	YES
NETO1	c1_3	c1_13	c1_37		7	4.98231	0.481821	c1_37	c1_13	c1_13	c1_1		YES										YES																								YES
CYSTM1	c1_3	c1_9		6	4.26307	0.612484	c1_9	c1_9	c1_9	c1_1		YES						YES
DYNC1H1	c1_2	c1_5	c1_19	c1_40	c1_63		5	3.2172	0.703741	c1_63	c1_40	c1_40	c1_1	YES			YES														YES
SATB1	c1_3	c1_11	c1_28	c1_44	c1_65	c1_72	c1_74		3	2.1474	1	c1_74	c1_44	c1_11	c1_1		YES								YES																	YES
FOXG1	c1_2	c1_5	c1_20	c1_42		5	3.52773	0.62567	c1_42	c1_20	c1_20	c1_1	YES			YES															YES
PIAS1	c1_3	c1_11	c1_28	c1_44	c1_65	c1_72	c1_74		4	2.96757	0.839599	c1_74	c1_44	c1_11	c1_1		YES								YES																	YES
SALL3	c1_3	c1_11	c1_32		3	2.08705	1	c1_32	c1_32	c1_11	c1_1		YES								YES																					YES
GABRA2	c1_3	c1_11	c1_28	c1_44	c1_64		3	2.03668	1	c1_64	c1_44	c1_11	c1_1		YES								YES																	YES
RANBP10	c1_3	c1_11	c1_29	c1_59		4	2.73346	0.515067	c1_59	c1_29	c1_11	c1_1		YES								YES																		YES
CAMK2D	c1_2	c1_5	c1_20	c1_42		3	2.10328	1	c1_42	c1_20	c1_20	c1_1	YES			YES															YES
LOC110479472	c1_2	c1_4	c1_15		4	2.63803	0.841903	c1_15	c1_4	c1_4	c1_1	YES		YES											YES
KIAA0513	c1_3	c1_9		2	1.35421	1	c1_9	c1_9	c1_9	c1_1		YES						YES
PPFIBP1	c1_2	c1_4	c1_15		3	1.99593	1	c1_15	c1_4	c1_4	c1_1	YES		YES											YES
SRBD1	c1_2	c1_4	c1_15		3	1.97303	1	c1_15	c1_4	c1_4	c1_1	YES		YES											YES
THSD7A	c1_2	c1_4	c1_15		3	2.27336	1	c1_15	c1_4	c1_4	c1_1	YES		YES											YES
UTP23	c1_3	c1_11	c1_28	c1_44	c1_65	c1_72	c1_74		5	3.73075	0.70167	c1_74	c1_44	c1_11	c1_1		YES								YES																	YES
NDST1	c1_2	c1_4	c1_14		9	5.92304	0.398071	c1_14	c1_4	c1_4	c1_1	YES		YES										YES
TSSC4	c1_2	c1_4	c1_14		8	5.77581	0.428706	c1_14	c1_4	c1_4	c1_1	YES		YES										YES
LRRTM1	c1_3	c1_11	c1_28	c1_44	c1_64		3	2.07875	1	c1_64	c1_44	c1_11	c1_1		YES								YES																	YES
SRA1	c1_2	c1_4	c1_14		4	2.90611	0.836606	c1_14	c1_4	c1_4	c1_1	YES		YES										YES
ECD	c1_3	c1_11	c1_28	c1_44	c1_65	c1_72	c1_75		3	2.09902	1	c1_75	c1_44	c1_11	c1_1		YES								YES																	YES
DBR1	c1_2	c1_5	c1_20	c1_42		3	2.17046	1	c1_42	c1_20	c1_20	c1_1	YES			YES															YES
DUSP1	c1_3	c1_11	c1_28	c1_44	c1_65	c1_73		4	2.81569	0.834215	c1_73	c1_44	c1_11	c1_1		YES								YES																	YES
TMEM109	c1_3	c1_11	c1_29	c1_60	c1_68		4	2.76931	0.843737	c1_68	c1_29	c1_11	c1_1		YES								YES																		YES
LOC110481779	c1_3	c1_11	c1_29	c1_59		6	4.04374	0.617377	c1_59	c1_29	c1_11	c1_1		YES								YES																		YES
FA2H	c1_2	c1_6		3	2.10169	1	c1_6	c1_6	c1_6	c1_1	YES				YES
NFXL1	c1_2	c1_4	c1_15		3	2.22379	1	c1_15	c1_4	c1_4	c1_1	YES		YES											YES
LCA5	c1_3	c1_11	c1_28	c1_44	c1_65	c1_73		4	2.76256	0.682975	c1_73	c1_44	c1_11	c1_1		YES								YES																	YES
GM2A	c1_3	c1_11	c1_28	c1_44	c1_64		8	5.80366	0.465348	c1_64	c1_44	c1_11	c1_1		YES								YES																	YES
FLOT1	c1_3	c1_11	c1_28	c1_44	c1_64		3	2.20478	1	c1_64	c1_44	c1_11	c1_1		YES								YES																	YES
MAP2K1	c1_2	c1_4	c1_14		4	2.72099	0.69639	c1_14	c1_4	c1_4	c1_1	YES		YES										YES
DAP	c1_2	c1_4	c1_15		5	3.46785	0.699431	c1_15	c1_4	c1_4	c1_1	YES		YES											YES
NEDD8	c1_3	c1_9		4	2.94412	0.830622	c1_9	c1_9	c1_9	c1_1		YES						YES
TRPS1	c1_3	c1_11	c1_28	c1_44	c1_65	c1_72	c1_74		6	4.13255	0.608234	c1_74	c1_44	c1_11	c1_1		YES								YES																	YES
ECH1	c1_2	c1_4	c1_15		3	2.04769	1	c1_15	c1_4	c1_4	c1_1	YES		YES											YES
COL12A1	c1_2	c1_4	c1_15		4	2.75814	0.838351	c1_15	c1_4	c1_4	c1_1	YES		YES											YES
NXPH1	c1_3	c1_10		4	2.90993	0.836929	c1_10	c1_10	c1_10	c1_1		YES							YES
CACNB2	c1_3	c1_11	c1_28	c1_44	c1_65	c1_72	c1_74		4	2.66635	0.496642	c1_74	c1_44	c1_11	c1_1		YES								YES																	YES
LCOR	c1_3	c1_11	c1_28	c1_44	c1_65	c1_72	c1_74		3	1.87998	1	c1_74	c1_44	c1_11	c1_1		YES								YES																	YES
KCNH5	c1_3	c1_9		5	3.17027	0.713873	c1_9	c1_9	c1_9	c1_1		YES						YES
LOC116184781	c1_2	c1_4	c1_15		4	2.97442	0.836478	c1_15	c1_4	c1_4	c1_1	YES		YES											YES
MSTO1	c1_2	c1_4	c1_14		3	2.12409	1	c1_14	c1_4	c1_4	c1_1	YES		YES										YES
GEMIN2	c1_3	c1_11	c1_29	c1_59		4	2.71858	0.82293	c1_59	c1_29	c1_11	c1_1		YES								YES																		YES
DLG5	c1_3	c1_11	c1_28	c1_44	c1_64		3	2.05234	1	c1_64	c1_44	c1_11	c1_1		YES								YES																	YES
ZFAND6	c1_2	c1_5	c1_19	c1_39		3	1.87978	1	c1_39	c1_39	c1_39	c1_1	YES			YES														YES
LOC110478143	c1_3	c1_11	c1_33		4	2.73148	0.842365	c1_33	c1_33	c1_11	c1_1		YES								YES																						YES
CAMK2A	c1_2	c1_4	c1_15		7	5.05844	0.527298	c1_15	c1_4	c1_4	c1_1	YES		YES											YES
AMFR	c1_3	c1_13	c1_38		3	2.08963	1	c1_38	c1_13	c1_13	c1_1		YES										YES																									YES
PTPMT1	c1_3	c1_9		3	1.96649	1	c1_9	c1_9	c1_9	c1_1		YES						YES
RUNDC3A	c1_3	c1_9		4	2.82152	0.830726	c1_9	c1_9	c1_9	c1_1		YES						YES
DNMT1	c1_3	c1_11	c1_28	c1_44	c1_65	c1_72	c1_75		3	2.04432	1	c1_75	c1_44	c1_11	c1_1		YES								YES																	YES
RFWD3	c1_2	c1_5	c1_25		5	3.25247	0.694528	c1_25	c1_25	c1_25	c1_1	YES			YES																				YES
PDZD8	c1_2	c1_5	c1_25		5	3.245	0.506644	c1_25	c1_25	c1_25	c1_1	YES			YES																				YES
PPP1R9A	c1_3	c1_11	c1_28	c1_44	c1_65	c1_72	c1_74		4	2.71085	0.497839	c1_74	c1_44	c1_11	c1_1		YES								YES																	YES
NEK11	c1_3	c1_11	c1_28	c1_44	c1_65	c1_72	c1_74		3	2.0771	1	c1_74	c1_44	c1_11	c1_1		YES								YES																	YES
LRRC28	c1_3	c1_11	c1_28	c1_44	c1_64		3	2.038	1	c1_64	c1_44	c1_11	c1_1		YES								YES																	YES
FBXO25	c1_3	c1_9		3	2.11148	1	c1_9	c1_9	c1_9	c1_1		YES						YES
CALN1	c1_2	c1_5	c1_20	c1_42		6	3.86869	0.591651	c1_42	c1_20	c1_20	c1_1	YES			YES															YES
LAP3	c1_2	c1_5		2	1.2681	0	NA	NA	NA	c1_1	YES			YES
GATD1	c1_2	c1_4	c1_14		3	1.90924	1	c1_14	c1_4	c1_4	c1_1	YES		YES										YES
ISCA2	c1_2	c1_4	c1_14		3	2.04923	1	c1_14	c1_4	c1_4	c1_1	YES		YES										YES
LOC110470116	c1_3	c1_11	c1_28	c1_44	c1_64		3	1.91053	1	c1_64	c1_44	c1_11	c1_1		YES								YES																	YES
XRCC2	c1_2	c1_4	c1_14		4	2.63253	0.333333	c1_14	c1_4	c1_4	c1_1	YES		YES										YES
HTR4	c1_2	c1_4	c1_15		7	4.63226	0.442092	c1_15	c1_4	c1_4	c1_1	YES		YES											YES
RBM22	c1_3	c1_13	c1_38		3	1.92441	0.347448	c1_38	c1_13	c1_13	c1_1		YES										YES																									YES
MRPL21	c1_3	c1_11	c1_29	c1_59		5	3.48379	0.709876	c1_59	c1_29	c1_11	c1_1		YES								YES																		YES
CLP1	c1_3	c1_11	c1_29	c1_60	c1_68		4	2.93999	0.830664	c1_68	c1_29	c1_11	c1_1		YES								YES																		YES
WAC	c1_3	c1_13	c1_38		5	3.55825	0.707304	c1_38	c1_13	c1_13	c1_1		YES										YES																									YES
GUK1	c1_3	c1_11	c1_29	c1_59		5	3.36863	0.504828	c1_59	c1_29	c1_11	c1_1		YES								YES																		YES
SCAMP5	c1_3	c1_11	c1_28	c1_44	c1_65	c1_72	c1_74		5	3.30427	0.52237	c1_74	c1_44	c1_11	c1_1		YES								YES																	YES
NPY	c1_3	c1_9		5	3.44967	0.711539	c1_9	c1_9	c1_9	c1_1		YES						YES
TUFM	c1_3	c1_11	c1_28	c1_44	c1_64		3	1.89862	1	c1_64	c1_44	c1_11	c1_1		YES								YES																	YES
SLC29A1	c1_3	c1_11	c1_28	c1_55		3	1.96897	0.320702	c1_55	c1_55	c1_11	c1_1		YES								YES																	YES
HIGD1A	c1_2	c1_5	c1_26		1	0.740933	NaN	c1_26	c1_26	c1_26	c1_1	YES			YES																					YES
CCNG1	c1_3	c1_12		3	1.99565	1	c1_12	c1_12	c1_12	c1_1		YES									YES
LOC110481878	c1_2	c1_4	c1_15		2	1.30081	1	c1_15	c1_4	c1_4	c1_1	YES		YES											YES
MMD2	c1_3	c1_9		2	1.23253	1	c1_9	c1_9	c1_9	c1_1		YES						YES
PRPF4B	c1_3	c1_11	c1_28	c1_44	c1_65	c1_72	c1_74		3	2.15383	1	c1_74	c1_44	c1_11	c1_1		YES								YES																	YES
VSTM2B	c1_2	c1_4	c1_14		4	2.663	0.837771	c1_14	c1_4	c1_4	c1_1	YES		YES										YES
LOC110481786	c1_3	c1_11	c1_29	c1_60	c1_68		3	1.88471	1	c1_68	c1_29	c1_11	c1_1		YES								YES																		YES
MDGA2	c1_3	c1_11	c1_28	c1_44	c1_65	c1_72	c1_74		4	2.81594	0.838478	c1_74	c1_44	c1_11	c1_1		YES								YES																	YES
FAM184B	c1_3	c1_11	c1_29	c1_59		4	2.56995	0.840331	c1_59	c1_29	c1_11	c1_1		YES								YES																		YES
NUBPL	c1_2	c1_5	c1_19	c1_39		4	2.67462	0.826186	c1_39	c1_39	c1_39	c1_1	YES			YES														YES
GLRX5	c1_2	c1_5	c1_26		4	2.51669	0.513542	c1_26	c1_26	c1_26	c1_1	YES			YES																					YES
TK2	c1_2	c1_5	c1_19	c1_40	c1_62	c1_70		4	2.73306	0.835353	c1_70	c1_40	c1_40	c1_1	YES			YES														YES
ATRAID	c1_2	c1_4	c1_15		3	2.08279	1	c1_15	c1_4	c1_4	c1_1	YES		YES											YES
CRYZ	c1_2	c1_5	c1_19	c1_39		4	2.39047	0.846178	c1_39	c1_39	c1_39	c1_1	YES			YES														YES
HSD17B7	c1_2	c1_4	c1_14		3	2.00874	1	c1_14	c1_4	c1_4	c1_1	YES		YES										YES
LINGO1	c1_3	c1_11	c1_28	c1_44	c1_64		3	1.94813	1	c1_64	c1_44	c1_11	c1_1		YES								YES																	YES
FHOD3	c1_3	c1_11	c1_28	c1_44	c1_65	c1_73		5	3.19338	0.40106	c1_73	c1_44	c1_11	c1_1		YES								YES																	YES
LOC116184303	c1_3	c1_11	c1_28	c1_44	c1_65	c1_72	c1_74		3	1.87603	1	c1_74	c1_44	c1_11	c1_1		YES								YES																	YES
LOC116183997	c1_2	c1_4	c1_15		3	1.98437	1	c1_15	c1_4	c1_4	c1_1	YES		YES											YES
PANK3	c1_2	c1_5	c1_26		4	2.51989	0.819966	c1_26	c1_26	c1_26	c1_1	YES			YES																					YES
ATL1	c1_3	c1_11	c1_28	c1_44	c1_65	c1_73		3	1.8462	1	c1_73	c1_44	c1_11	c1_1		YES								YES																	YES
GPX3	c1_3	c1_11	c1_28	c1_44	c1_64		3	2.02651	1	c1_64	c1_44	c1_11	c1_1		YES								YES																	YES
PSD2	c1_3	c1_11	c1_28	c1_44	c1_65	c1_72	c1_74		6	3.93924	0.460026	c1_74	c1_44	c1_11	c1_1		YES								YES																	YES
CBLN2	c1_2	c1_5	c1_19	c1_39		3	1.95323	1	c1_39	c1_39	c1_39	c1_1	YES			YES														YES
ACBD7	c1_3	c1_11	c1_28	c1_44	c1_64		3	1.92346	1	c1_64	c1_44	c1_11	c1_1		YES								YES																	YES
LOC110480682	c1_3	c1_11	c1_28		4	2.75338	0.491372	NA	NA	c1_11	c1_1		YES								YES																	YES
LOC110482719	c1_3	c1_9		1	0.725	NaN	c1_9	c1_9	c1_9	c1_1		YES						YES
CSPG5	c1_2	c1_4	c1_15		3	2.0689	1	c1_15	c1_4	c1_4	c1_1	YES		YES											YES
LOC110473962	c1_3	c1_11	c1_28		5	3.40531	0.50333	NA	NA	c1_11	c1_1		YES								YES																	YES
SMIM32	c1_2	c1_4	c1_18		2	1.36742	1	c1_18	c1_4	c1_4	c1_1	YES		YES														YES
TTC1	c1_3	c1_11	c1_28	c1_44	c1_64		3	1.94178	0.686204	c1_64	c1_44	c1_11	c1_1		YES								YES																	YES
RIOK3	c1_2	c1_5	c1_25		3	1.93407	1	c1_25	c1_25	c1_25	c1_1	YES			YES																				YES
MRPS28	c1_2	c1_5	c1_19	c1_40	c1_62	c1_70		3	1.97471	1	c1_70	c1_40	c1_40	c1_1	YES			YES														YES
RDH10	c1_3	c1_11	c1_34		4	2.64461	0.847895	c1_34	c1_34	c1_11	c1_1		YES								YES																							YES
NAT10	c1_2	c1_4	c1_15		4	2.65433	0.845364	c1_15	c1_4	c1_4	c1_1	YES		YES											YES
SFXN4	c1_3	c1_13	c1_37		2	1.30792	1	c1_37	c1_13	c1_13	c1_1		YES										YES																								YES
NBR1	c1_3	c1_13	c1_37		5	3.12835	0.513405	c1_37	c1_13	c1_13	c1_1		YES										YES																								YES
ITGB1	c1_2	c1_5	c1_19	c1_39		3	1.98104	1	c1_39	c1_39	c1_39	c1_1	YES			YES														YES
LOC110475086	c1_3	c1_9		5	3.20799	0.708144	c1_9	c1_9	c1_9	c1_1		YES						YES
DAP3	c1_2	c1_4	c1_15		3	1.90783	1	c1_15	c1_4	c1_4	c1_1	YES		YES											YES
LRFN5	c1_2	c1_5		2	1.26168	1	NA	NA	NA	c1_1	YES			YES
LOC110478185	c1_2	c1_4	c1_15		5	3.10791	0.715514	c1_15	c1_4	c1_4	c1_1	YES		YES											YES
OAZ2	c1_2	c1_4	c1_15		3	1.8537	1	c1_15	c1_4	c1_4	c1_1	YES		YES											YES
LOC110475293	c1_2	c1_4	c1_15		3	1.9798	1	c1_15	c1_4	c1_4	c1_1	YES		YES											YES
NRP1	c1_3	c1_11	c1_28	c1_44	c1_65		5	3.29197	0.71428	NA	c1_44	c1_11	c1_1		YES								YES																	YES
RSPO2	c1_2	c1_4	c1_14		3	2.0571	1	c1_14	c1_4	c1_4	c1_1	YES		YES										YES
C1QTNF4	c1_2	c1_4	c1_14		3	2.0283	1	c1_14	c1_4	c1_4	c1_1	YES		YES										YES
LOC110484532	c1_2	c1_4	c1_15		7	4.37519	0.495351	c1_15	c1_4	c1_4	c1_1	YES		YES											YES
OGA	c1_3	c1_13	c1_38		3	1.95772	1	c1_38	c1_13	c1_13	c1_1		YES										YES																									YES
LOC110470065	c1_3	c1_11	c1_29	c1_59		4	2.62957	0.828648	c1_59	c1_29	c1_11	c1_1		YES								YES																		YES
FBXO45	c1_3	c1_11	c1_28		5	3.07331	0.405242	NA	NA	c1_11	c1_1		YES								YES																	YES
ANXA6	c1_3	c1_11	c1_28	c1_46	c1_66		2	1.24533	1	c1_66	c1_46	c1_11	c1_1		YES								YES																	YES
TRAPPC8	c1_2	c1_5	c1_25		4	2.40108	0.676392	c1_25	c1_25	c1_25	c1_1	YES			YES																				YES
KCTD16	c1_2	c1_4	c1_14		10	6.28757	0.276621	c1_14	c1_4	c1_4	c1_1	YES		YES										YES
LOC110484786	c1_3	c1_9		4	2.55592	0.490099	c1_9	c1_9	c1_9	c1_1		YES						YES
NT5C3A	c1_3	c1_11	c1_28	c1_44	c1_65	c1_73		3	1.87032	1	c1_73	c1_44	c1_11	c1_1		YES								YES																	YES
LOC116183735	c1_2	c1_4	c1_15		4	2.39775	0.824013	c1_15	c1_4	c1_4	c1_1	YES		YES											YES
LOC116184115	c1_3	c1_9		3	1.82205	1	c1_9	c1_9	c1_9	c1_1		YES						YES
LOC110482711	c1_3	c1_9		7	4.27188	0.529271	c1_9	c1_9	c1_9	c1_1		YES						YES
ATP6V0E1	c1_2	c1_4	c1_14		5	3.17068	0.589692	c1_14	c1_4	c1_4	c1_1	YES		YES										YES
LOC110474256	c1_2	c1_5	c1_19	c1_40	c1_62	c1_71		4	2.65923	0.84114	c1_71	c1_40	c1_40	c1_1	YES			YES														YES
GABRA1	c1_3	c1_13	c1_38		4	2.49985	0.836106	c1_38	c1_13	c1_13	c1_1		YES										YES																									YES
SYT12	c1_2	c1_4	c1_15		5	3.24457	0.416896	c1_15	c1_4	c1_4	c1_1	YES		YES											YES
ST6GAL1	c1_2	c1_4	c1_15		2	1.27774	1	c1_15	c1_4	c1_4	c1_1	YES		YES											YES
ATP2A3	c1_3	c1_11	c1_29	c1_59		3	1.95001	1	c1_59	c1_29	c1_11	c1_1		YES								YES																		YES
SYT13	c1_3	c1_13	c1_37		4	2.57978	0.826063	c1_37	c1_13	c1_13	c1_1		YES										YES																								YES
LOC110476061	c1_2	c1_5	c1_26		3	1.75185	0.701039	c1_26	c1_26	c1_26	c1_1	YES			YES																					YES
LOC110482089	c1_3	c1_13	c1_37		3	1.68665	1	c1_37	c1_13	c1_13	c1_1		YES										YES																								YES
EIF3A	c1_2	c1_5	c1_19	c1_39		2	1.23838	1	c1_39	c1_39	c1_39	c1_1	YES			YES														YES
GOLGA4	c1_3	c1_11	c1_30		3	1.85513	1	c1_30	c1_30	c1_11	c1_1		YES								YES																			YES
PGM1	c1_3	c1_11	c1_28	c1_44	c1_65	c1_72	c1_74		3	1.88484	1	c1_74	c1_44	c1_11	c1_1		YES								YES																	YES
PRR18	c1_3	c1_9		3	1.79911	1	c1_9	c1_9	c1_9	c1_1		YES						YES
LOC110477572	c1_2	c1_5	c1_20	c1_42		2	1.19675	1	c1_42	c1_20	c1_20	c1_1	YES			YES															YES
AGFG1	c1_2	c1_5	c1_22		4	2.52864	0.513862	c1_22	c1_22	c1_22	c1_1	YES			YES																	YES
MFGE8	c1_2	c1_5	c1_22		3	1.97236	1	c1_22	c1_22	c1_22	c1_1	YES			YES																	YES
RPRD1A	c1_2	c1_4	c1_15		4	2.5954	0.669781	c1_15	c1_4	c1_4	c1_1	YES		YES											YES
LOC110467904	c1_2	c1_4	c1_14		4	2.48548	0.816339	c1_14	c1_4	c1_4	c1_1	YES		YES										YES
NRN1L	c1_2	c1_4	c1_15		3	1.9315	1	c1_15	c1_4	c1_4	c1_1	YES		YES											YES
CRHR1	c1_2	c1_4	c1_15		4	2.46845	0.508856	c1_15	c1_4	c1_4	c1_1	YES		YES											YES
LOC110474682	c1_2	c1_4	c1_15		3	1.7163	1	c1_15	c1_4	c1_4	c1_1	YES		YES											YES
ANAPC13	c1_2	c1_4	c1_15		3	1.76406	1	c1_15	c1_4	c1_4	c1_1	YES		YES											YES
LOC110468832	c1_2	c1_4	c1_15		3	1.72827	1	c1_15	c1_4	c1_4	c1_1	YES		YES											YES
SF3B3	c1_2	c1_4	c1_15		4	2.46939	0.67897	c1_15	c1_4	c1_4	c1_1	YES		YES											YES
RBM27	c1_3	c1_11	c1_31		2	1.28649	1	c1_31	c1_31	c1_11	c1_1		YES								YES																				YES
CRTAC1	c1_2	c1_4	c1_15		3	1.7896	1	c1_15	c1_4	c1_4	c1_1	YES		YES											YES
TNFRSF21	c1_2	c1_5	c1_25		2	1.25454	1	c1_25	c1_25	c1_25	c1_1	YES			YES																				YES
CIAPIN1	c1_3	c1_11	c1_29	c1_59		2	1.18482	1	c1_59	c1_29	c1_11	c1_1		YES								YES																		YES
RHOJ	c1_3	c1_11	c1_28	c1_46	c1_66		3	1.86491	1	c1_66	c1_46	c1_11	c1_1		YES								YES																	YES
ANKRD11	c1_2	c1_5	c1_25		3	1.98666	0.671788	c1_25	c1_25	c1_25	c1_1	YES			YES																				YES
TRIB1	c1_3	c1_11	c1_28		3	1.85011	0.680747	NA	NA	c1_11	c1_1		YES								YES																	YES
NPEPPS	c1_3	c1_11	c1_29	c1_60	c1_68		4	2.46658	0.832698	c1_68	c1_29	c1_11	c1_1		YES								YES																		YES
LOC110472033	c1_2	c1_5	c1_20	c1_41		1	0.682012	NaN	c1_41	c1_20	c1_20	c1_1	YES			YES															YES
GRK6	c1_2	c1_4		3	1.93077	1	NA	c1_4	c1_4	c1_1	YES		YES
PRELID3A	c1_3	c1_11	c1_28	c1_44	c1_65	c1_73		3	1.69376	1	c1_73	c1_44	c1_11	c1_1		YES								YES																	YES
CENPC	c1_3	c1_11	c1_34		3	1.82136	1	c1_34	c1_34	c1_11	c1_1		YES								YES																							YES
CD9	c1_2	c1_4	c1_15		3	1.90529	1	c1_15	c1_4	c1_4	c1_1	YES		YES											YES
DDOST	c1_2	c1_5	c1_25		3	1.843	1	c1_25	c1_25	c1_25	c1_1	YES			YES																				YES
LRBA	c1_3	c1_11	c1_35	c1_35	3	1.81186	0.678254	c1_35	c1_35	c1_11	c1_1		YES								YES																								YES
CNKSR3	c1_3	c1_11	c1_28	c1_44	c1_64		3	1.9744	1	c1_64	c1_44	c1_11	c1_1		YES								YES																	YES
CD74	c1_2	c1_4	c1_14		3	1.771	1	c1_14	c1_4	c1_4	c1_1	YES		YES										YES
HCFC2	c1_3	c1_11	c1_28	c1_44	c1_65	c1_72	c1_74		3	1.78854	1	c1_74	c1_44	c1_11	c1_1		YES								YES																	YES
SLC24A4	c1_2	c1_5	c1_19	c1_39		1	0.680174	NaN	c1_39	c1_39	c1_39	c1_1	YES			YES														YES
MED1	c1_2	c1_5	c1_22		3	2.01958	1	c1_22	c1_22	c1_22	c1_1	YES			YES																	YES
LOC110474003	c1_2	c1_4	c1_15		1	0.679639	NaN	c1_15	c1_4	c1_4	c1_1	YES		YES											YES
CCDC127	c1_2	c1_5	c1_19	c1_40	c1_63		3	1.86788	1	c1_63	c1_40	c1_40	c1_1	YES			YES														YES
TCTN3	c1_2	c1_5	c1_23		4	2.37148	0.829859	c1_23	c1_23	c1_23	c1_1	YES			YES																		YES
LOC110467899	c1_3	c1_9		1	0.678206	NaN	c1_9	c1_9	c1_9	c1_1		YES						YES
KPNB1	c1_2	c1_5	c1_20	c1_42		3	1.77456	1	c1_42	c1_20	c1_20	c1_1	YES			YES															YES
LOC110474297	c1_2	c1_5	c1_19	c1_39		1	0.677602	NaN	c1_39	c1_39	c1_39	c1_1	YES			YES														YES
EML6	c1_2	c1_5	c1_24		2	1.21278	1	c1_24	c1_24	c1_24	c1_1	YES			YES																			YES
TGFBR2	c1_2	c1_5	c1_19	c1_39		3	1.86281	1	c1_39	c1_39	c1_39	c1_1	YES			YES														YES
LOC110475166	c1_2	c1_5		3	1.77471	1	NA	NA	NA	c1_1	YES			YES
LOC110483264	c1_3	c1_11	c1_28		1	0.670414	NaN	NA	NA	c1_11	c1_1		YES								YES																	YES
LOC110484903	c1_3	c1_11	c1_28	c1_50		3	1.79253	1	c1_50	c1_50	c1_11	c1_1		YES								YES																	YES
GLI3	c1_2	c1_5	c1_19	c1_39		2	1.2671	1	c1_39	c1_39	c1_39	c1_1	YES			YES														YES
PDCD2L	c1_2	c1_4	c1_15		2	1.29199	1	c1_15	c1_4	c1_4	c1_1	YES		YES											YES
ENTPD3	c1_2	c1_4	c1_14		4	2.54203	0.840409	c1_14	c1_4	c1_4	c1_1	YES		YES										YES
LOC110479462	c1_2	c1_4	c1_15		3	1.95854	1	c1_15	c1_4	c1_4	c1_1	YES		YES											YES
HERPUD2	c1_3	c1_13	c1_37		3	1.88862	1	c1_37	c1_13	c1_13	c1_1		YES										YES																								YES
LOC110478653	c1_2	c1_8		2	1.14678	1	c1_8	c1_8	c1_8	c1_1	YES						YES
LOC110483671	c1_2	c1_5	c1_25		2	1.18435	1	c1_25	c1_25	c1_25	c1_1	YES			YES																				YES
KIAA1217	c1_3	c1_9		3	1.77744	1	c1_9	c1_9	c1_9	c1_1		YES						YES
GADL1	c1_2	c1_5	c1_25		1	0.664574	NaN	c1_25	c1_25	c1_25	c1_1	YES			YES																				YES
NFATC1	c1_3	c1_11	c1_28	c1_44	c1_64		3	1.69919	1	c1_64	c1_44	c1_11	c1_1		YES								YES																	YES
KLHL36	c1_2	c1_7		2	1.20873	1	c1_7	c1_7	c1_7	c1_1	YES					YES
TMEM63A	c1_2	c1_5	c1_24		4	2.22459	0.838795	c1_24	c1_24	c1_24	c1_1	YES			YES																			YES
ANKMY2	c1_3	c1_11	c1_28	c1_44	c1_64		4	2.34075	0.844032	c1_64	c1_44	c1_11	c1_1		YES								YES																	YES
ARAP3	c1_2	c1_4	c1_15		3	1.68251	1	c1_15	c1_4	c1_4	c1_1	YES		YES											YES
RGS6	c1_3	c1_11	c1_28	c1_44	c1_65	c1_73		2	1.25291	0	c1_73	c1_44	c1_11	c1_1		YES								YES																	YES
MIS18A	c1_3	c1_11	c1_29	c1_59		3	1.71211	1	c1_59	c1_29	c1_11	c1_1		YES								YES																		YES
LOC110484765	c1_3	c1_11	c1_28		2	1.20238	1	NA	NA	c1_11	c1_1		YES								YES																	YES
AOAH	c1_3	c1_11	c1_29	c1_59		3	1.87837	1	c1_59	c1_29	c1_11	c1_1		YES								YES																		YES
GJC2	c1_2	c1_5	c1_19	c1_39		1	0.654111	NaN	c1_39	c1_39	c1_39	c1_1	YES			YES														YES
LOC110483937	c1_3	c1_11	c1_28	c1_48		4	2.22157	0.670661	c1_48	c1_48	c1_11	c1_1		YES								YES																	YES
LOC110468077	c1_2	c1_4	c1_14		4	2.35252	0.690578	c1_14	c1_4	c1_4	c1_1	YES		YES										YES
LOC110479638	c1_2	c1_6		1	0.652962	NaN	c1_6	c1_6	c1_6	c1_1	YES				YES
ZNF407	c1_3	c1_11	c1_28	c1_44	c1_64		3	1.81693	1	c1_64	c1_44	c1_11	c1_1		YES								YES																	YES
LOC110474298	c1_3	c1_11	c1_29	c1_59		4	2.42207	0.333333	c1_59	c1_29	c1_11	c1_1		YES								YES																		YES
CFAP20	c1_3	c1_9		2	1.16097	1	c1_9	c1_9	c1_9	c1_1		YES						YES
LOC110478029	c1_2	c1_5	c1_25		4	2.5408	0.50255	c1_25	c1_25	c1_25	c1_1	YES			YES																				YES
LOC110482767	c1_3	c1_13	c1_37		3	1.76731	1	c1_37	c1_13	c1_13	c1_1		YES										YES																								YES
LOC110482040	c1_2	c1_5	c1_24		4	2.30588	0.328298	c1_24	c1_24	c1_24	c1_1	YES			YES																			YES
LOC110468657	c1_3	c1_11	c1_28	c1_44	c1_64		2	1.12814	1	c1_64	c1_44	c1_11	c1_1		YES								YES																	YES
EPOR	c1_2	c1_5	c1_21		3	1.78882	0.65162	c1_21	c1_21	c1_21	c1_1	YES			YES																YES
AXIN1	c1_2	c1_4	c1_14		2	1.13615	1	c1_14	c1_4	c1_4	c1_1	YES		YES										YES
POLR3D	c1_3	c1_9		2	1.22883	1	c1_9	c1_9	c1_9	c1_1		YES						YES
ESRRB	c1_3	c1_13	c1_37		1	0.644188	NaN	c1_37	c1_13	c1_13	c1_1		YES										YES																								YES
LOC110469740	c1_3	c1_11	c1_36		2	1.2439	0	c1_36	c1_36	c1_11	c1_1		YES								YES																									YES
NEUROD6	c1_3	c1_11	c1_29	c1_59		4	2.45473	0.505481	c1_59	c1_29	c1_11	c1_1		YES								YES																		YES
LOC110477338	c1_2	c1_5	c1_19	c1_39		4	2.35452	0.494427	c1_39	c1_39	c1_39	c1_1	YES			YES														YES
LOC110483201	c1_3	c1_13	c1_37		5	2.96008	0.61298	c1_37	c1_13	c1_13	c1_1		YES										YES																								YES
ACVR2B	c1_3	c1_11	c1_28	c1_44	c1_65	c1_73		1	0.637179	NaN	c1_73	c1_44	c1_11	c1_1		YES								YES																	YES
GPRIN1	c1_3	c1_11	c1_31		4	2.2837	0.496762	c1_31	c1_31	c1_11	c1_1		YES								YES																				YES
HSPA13	c1_3	c1_11	c1_29	c1_61		1	0.635398	NaN	c1_61	c1_29	c1_11	c1_1		YES								YES																		YES
CPLX3	c1_3	c1_9		3	1.73089	0.316805	c1_9	c1_9	c1_9	c1_1		YES						YES
USH1C	c1_2	c1_4		2	1.13385	1	NA	c1_4	c1_4	c1_1	YES		YES
LOC110473332	c1_2	c1_5	c1_22		3	1.82558	1	c1_22	c1_22	c1_22	c1_1	YES			YES																	YES
TRMT11	c1_3	c1_11	c1_29	c1_59		2	1.15277	1	c1_59	c1_29	c1_11	c1_1		YES								YES																		YES
IGF2	c1_3	c1_11	c1_29	c1_59		2	1.13473	1	c1_59	c1_29	c1_11	c1_1		YES								YES																		YES
SLC43A2	c1_2	c1_6		3	1.72076	0.316773	c1_6	c1_6	c1_6	c1_1	YES				YES
LOC110475699	c1_3	c1_11	c1_28	c1_44	c1_64		2	1.24189	1	c1_64	c1_44	c1_11	c1_1		YES								YES																	YES
GGPS1	c1_3	c1_11	c1_28	c1_44	c1_64		1	0.629295	NaN	c1_64	c1_44	c1_11	c1_1		YES								YES																	YES
LIN7A	c1_3	c1_9		3	1.71189	1	c1_9	c1_9	c1_9	c1_1		YES						YES
RBM24	c1_3	c1_11		1	0.62469	NaN	NA	NA	c1_11	c1_1		YES								YES
TYMS	c1_3	c1_9		1	0.624026	NaN	c1_9	c1_9	c1_9	c1_1		YES						YES
DPY19L3	c1_3	c1_11	c1_28	c1_46	c1_67		2	1.12828	1	c1_67	c1_46	c1_11	c1_1		YES								YES																	YES
MARVELD1	c1_3	c1_13	c1_37		1	0.621616	NaN	c1_37	c1_13	c1_13	c1_1		YES										YES																								YES
CRHR2	c1_3	c1_11	c1_28		1	0.619631	NaN	NA	NA	c1_11	c1_1		YES								YES																	YES
API5	c1_2	c1_4	c1_15		3	1.79078	1	c1_15	c1_4	c1_4	c1_1	YES		YES											YES
TBRG4	c1_2	c1_5	c1_25		1	0.61502	NaN	c1_25	c1_25	c1_25	c1_1	YES			YES																				YES
LOC110477011	c1_2	c1_5	c1_20	c1_41		3	1.77788	0.341085	c1_41	c1_20	c1_20	c1_1	YES			YES															YES
HMBS	c1_2	c1_5	c1_19	c1_39		1	0.612231	NaN	c1_39	c1_39	c1_39	c1_1	YES			YES														YES
LOC110479986	c1_2	c1_5	c1_27		2	1.10862	1	c1_27	c1_27	c1_27	c1_1	YES			YES																						YES
BTBD10	c1_2	c1_4	c1_15		2	1.20268	0	c1_15	c1_4	c1_4	c1_1	YES		YES											YES
LOC110484950	c1_2	c1_5	c1_25		3	1.67437	1	c1_25	c1_25	c1_25	c1_1	YES			YES																				YES
KCTD1	c1_2	c1_5	c1_25		1	0.609354	NaN	c1_25	c1_25	c1_25	c1_1	YES			YES																				YES
CRABP1	c1_3	c1_11	c1_28	c1_48		2	1.14651	1	c1_48	c1_48	c1_11	c1_1		YES								YES																	YES
VMP1	c1_2	c1_5	c1_19	c1_39		2	1.11422	1	c1_39	c1_39	c1_39	c1_1	YES			YES														YES
EEPD1	c1_3	c1_11	c1_34		1	0.604716	NaN	c1_34	c1_34	c1_11	c1_1		YES								YES																							YES
SLIT3	c1_3	c1_11	c1_28	c1_44	c1_65		3	1.62274	1	NA	c1_44	c1_11	c1_1		YES								YES																	YES
LOC110474508	c1_2	c1_5	c1_19	c1_39		1	0.600874	NaN	c1_39	c1_39	c1_39	c1_1	YES			YES														YES
AQP1	c1_3	c1_11	c1_28	c1_44	c1_64		1	0.600747	NaN	c1_64	c1_44	c1_11	c1_1		YES								YES																	YES
LOC110482417	c1_2	c1_5	c1_20	c1_43		2	1.11382	1	c1_43	c1_20	c1_20	c1_1	YES			YES															YES
MSI2	c1_2	c1_4	c1_15		2	1.15541	1	c1_15	c1_4	c1_4	c1_1	YES		YES											YES
KCNJ9	c1_2	c1_4	c1_14		4	2.19273	0.651703	c1_14	c1_4	c1_4	c1_1	YES		YES										YES
STARD10	c1_2	c1_4	c1_15		1	0.59889	NaN	c1_15	c1_4	c1_4	c1_1	YES		YES											YES
RGL1	c1_2	c1_4	c1_17		1	0.5975	NaN	c1_17	c1_4	c1_4	c1_1	YES		YES													YES
KCNF1	c1_2	c1_5	c1_21		1	0.596616	NaN	c1_21	c1_21	c1_21	c1_1	YES			YES																YES
POU3F2	c1_2	c1_5	c1_25		1	0.595884	NaN	c1_25	c1_25	c1_25	c1_1	YES			YES																				YES
ECHS1	c1_2	c1_4	c1_15		2	1.17704	1	c1_15	c1_4	c1_4	c1_1	YES		YES											YES
GFAP	c1_3	c1_9		2	1.07877	1	c1_9	c1_9	c1_9	c1_1		YES						YES
SBSPON	c1_3	c1_9		3	1.6701	1	c1_9	c1_9	c1_9	c1_1		YES						YES
BTD	c1_2	c1_5	c1_27		2	1.0961	1	c1_27	c1_27	c1_27	c1_1	YES			YES																						YES
AFF4	c1_3	c1_11	c1_28		2	1.17042	0	NA	NA	c1_11	c1_1		YES								YES																	YES
CSMD3	c1_3	c1_13	c1_37		2	1.1632	1	c1_37	c1_13	c1_13	c1_1		YES										YES																								YES
ABHD12	c1_3	c1_11	c1_28	c1_54		1	0.586311	NaN	c1_54	c1_54	c1_11	c1_1		YES								YES																	YES
FANCF	c1_2	c1_4	c1_14		1	0.585463	NaN	c1_14	c1_4	c1_4	c1_1	YES		YES										YES
PHF20L1	c1_2	c1_5	c1_25		3	1.60161	1	c1_25	c1_25	c1_25	c1_1	YES			YES																				YES
YTHDF3	c1_3	c1_9		1	0.5809	NaN	c1_9	c1_9	c1_9	c1_1		YES						YES
DIPK1C	c1_3	c1_13	c1_37		1	0.577657	NaN	c1_37	c1_13	c1_13	c1_1		YES										YES																								YES
LOC110472113	c1_2	c1_4	c1_14		2	1.11659	1	c1_14	c1_4	c1_4	c1_1	YES		YES										YES
LOC110483779	c1_3	c1_11	c1_30		1	0.574388	NaN	c1_30	c1_30	c1_11	c1_1		YES								YES																			YES
ALDH16A1	c1_3	c1_11	c1_28	c1_44	c1_64		1	0.573227	NaN	c1_64	c1_44	c1_11	c1_1		YES								YES																	YES
MSRB2	c1_2	c1_4	c1_14		2	1.09061	1	c1_14	c1_4	c1_4	c1_1	YES		YES										YES
ZNF652	c1_2	c1_5	c1_19	c1_39		1	0.565979	NaN	c1_39	c1_39	c1_39	c1_1	YES			YES														YES
TSR1	c1_2	c1_4	c1_14		1	0.565767	NaN	c1_14	c1_4	c1_4	c1_1	YES		YES										YES
EXOC3L1	c1_2	c1_5	c1_20	c1_42		1	0.561126	NaN	c1_42	c1_20	c1_20	c1_1	YES			YES															YES
POT1	c1_2	c1_4	c1_14		1	0.557217	NaN	c1_14	c1_4	c1_4	c1_1	YES		YES										YES
ATXN7L3	c1_3	c1_9		1	0.556087	NaN	c1_9	c1_9	c1_9	c1_1		YES						YES
LOC116183814	c1_2	c1_5	c1_19	c1_39		1	0.555151	NaN	c1_39	c1_39	c1_39	c1_1	YES			YES														YES
NDNF	c1_3	c1_11	c1_29	c1_59		2	1.0444	1	c1_59	c1_29	c1_11	c1_1		YES								YES																		YES
CMTR2	c1_3	c1_9		1	0.550251	NaN	c1_9	c1_9	c1_9	c1_1		YES						YES
LOC110468139	c1_3	c1_11	c1_30		2	1.04708	1	c1_30	c1_30	c1_11	c1_1		YES								YES																			YES
LOC110481750	c1_3	c1_9		1	0.54851	NaN	c1_9	c1_9	c1_9	c1_1		YES						YES
SERF2	c1_3	c1_11	c1_30		1	0.540482	NaN	c1_30	c1_30	c1_11	c1_1		YES								YES																			YES
CARTPT	c1_3	c1_11	c1_32		1	0.53676	NaN	c1_32	c1_32	c1_11	c1_1		YES								YES																					YES
CDH19	c1_2	c1_5	c1_19	c1_39		1	0.534584	NaN	c1_39	c1_39	c1_39	c1_1	YES			YES														YES
LOC116183402	c1_3	c1_11	c1_33		1	0.528206	NaN	c1_33	c1_33	c1_11	c1_1		YES								YES																						YES
RREB1	c1_2	c1_5	c1_19	c1_39		1	0.514002	NaN	c1_39	c1_39	c1_39	c1_1	YES			YES														YES
MEI4	c1_3	c1_11	c1_29	c1_60		1	0.505795	NaN	NA	c1_29	c1_11	c1_1		YES								YES																		YES
ADRA2A	c1_2	c1_4	c1_18		1	0.501083	NaN	c1_18	c1_4	c1_4	c1_1	YES		YES														YES
PPARG	c1_2	c1_4	c1_15		1	0.497657	NaN	c1_15	c1_4	c1_4	c1_1	YES		YES											YES
LOC110477800	c1_3	c1_11	c1_28		1	0.496386	NaN	NA	NA	c1_11	c1_1		YES								YES																	YES
LOC110471860	c1_2	c1_4	c1_14		1	0.491499	NaN	c1_14	c1_4	c1_4	c1_1	YES		YES										YES
LHX9	c1_3		1	0.488845	NaN	NA	NA	NA	c1_1		YES
GFER	c1_3	c1_11	c1_28		1	0.488686	NaN	NA	NA	c1_11	c1_1		YES								YES																	YES
LOC110469665	c1_3	c1_13	c1_37		1	0.479245	NaN	c1_37	c1_13	c1_13	c1_1		YES										YES																								YES
[truncated: 34 more columns]

## Sheet: RA
id	module.membership	KD.membership	node.degree	node.strength	node.weightedCF	S1(min.alpha=0.05)	S1(max.alpha=1.2)	S2(min.alpha=1.91)	S2(max.alpha=Inf)	c1_2	c1_3	c1_4	c1_5	c1_6	c1_7	c1_8	c1_9	c1_10	c1_11	c1_12	c1_13	c1_14	c1_15	c1_16	c1_17	c1_18	c1_19	c1_20	c1_21	c1_22	c1_23	c1_24	c1_25	c1_26	c1_27	c1_28	c1_29	c1_30	c1_31	c1_32	c1_33	c1_34	c1_35	c1_37	c1_38	c1_39	c1_40	c1_41	c1_42
TYSND1	c1_2	c1_4	c1_9	c1_27	c1_55		9	5.73803	0.454315	c1_55	c1_4	c1_2	c1_1	YES		YES					YES																		YES
NPTN	c1_2	c1_4	c1_9	c1_27	c1_55	c1_1	c1_2	15	9.43161	0.262549	c1_55	c1_4	c1_2	c1_1	YES		YES					YES																		YES
LOC110484493	c1_2	c1_5	c1_13	c1_34	c1_60	c1_1	c1_2	c1_5	c1_13	c1_34	c1_60	38	23.808	0.108926	c1_60	c1_60	c1_2	c1_1	YES			YES								YES
FDFT1	c1_2	c1_5	c1_13	c1_35	c1_65		4	2.50074	0.813859	c1_65	c1_35	c1_2	c1_1	YES			YES								YES																						YES
NFE2L1	c1_2	c1_5	c1_13	c1_34	c1_60		6	4.08094	0.605002	c1_60	c1_60	c1_2	c1_1	YES			YES								YES																					YES
ELMOD2	c1_2	c1_4	c1_9	c1_27	c1_55	c1_1	c1_2	c1_4	c1_9	c1_27	c1_55	42	25.6432	0.101687	c1_55	c1_4	c1_2	c1_1	YES		YES					YES																		YES
GLS	c1_2	c1_5	c1_13	c1_34	c1_60		8	5.13473	0.477735	c1_60	c1_60	c1_2	c1_1	YES			YES								YES																					YES
NOP10	c1_3	c1_6	c1_15	c1_40	c1_1	c1_3	c1_6	c1_15	c1_40	40	27.1015	0.10823	c1_40	c1_40	c1_40	c1_1		YES			YES									YES
UBA52	c1_3	c1_6	c1_15	c1_40	c1_1	c1_3	c1_6	c1_15	c1_40	52	33.2031	0.0814582	c1_40	c1_40	c1_40	c1_1		YES			YES									YES
RPL39	c1_3	c1_6	c1_15	c1_40	c1_1	c1_3	c1_6	c1_15	c1_40	25	18.937	0.167082	c1_40	c1_40	c1_40	c1_1		YES			YES									YES
SETD6	c1_2	c1_4	c1_9	c1_27	c1_55		9	6.04973	0.408497	c1_55	c1_4	c1_2	c1_1	YES		YES					YES																		YES
LOC116184040	c1_3	c1_6	c1_15	c1_40		5	3.57869	0.643423	c1_40	c1_40	c1_40	c1_1		YES			YES									YES
LOC110474951	c1_3	c1_6	c1_15	c1_40		5	3.65379	0.7251	c1_40	c1_40	c1_40	c1_1		YES			YES									YES
RPL36	c1_3	c1_6	c1_15	c1_40	c1_1	c1_3	c1_6	c1_15	c1_40	17	10.6063	0.236732	c1_40	c1_40	c1_40	c1_1		YES			YES									YES
NDUFA11	c1_3	c1_6	c1_15	c1_40	c1_1	c1_3	c1_6	c1_15	c1_40	15	10.2836	0.276014	c1_40	c1_40	c1_40	c1_1		YES			YES									YES
RPS23	c1_3	c1_6	c1_15	c1_40		12	8.99967	0.339135	c1_40	c1_40	c1_40	c1_1		YES			YES									YES
ATP5F1D	c1_3	c1_6	c1_15	c1_41	c1_1	c1_3	c1_6	c1_15	c1_41	29	20.7699	0.141994	c1_41	c1_41	c1_41	c1_1		YES			YES									YES
RPS29	c1_3	c1_6	c1_15	c1_40	c1_1	c1_3	c1_6	c1_15	c1_40	16	11.0477	0.25443	c1_40	c1_40	c1_40	c1_1		YES			YES									YES
PLCG1	c1_2	c1_5	c1_13	c1_34	c1_61		5	3.0863	0.710395	c1_61	c1_61	c1_2	c1_1	YES			YES								YES																					YES
RPL28	c1_3	c1_6	c1_15	c1_40		11	7.45254	0.373814	c1_40	c1_40	c1_40	c1_1		YES			YES									YES
RPS27	c1_3	c1_6	c1_15	c1_40	c1_1	c1_3	c1_6	c1_15	c1_40	24	16.7419	0.175689	c1_40	c1_40	c1_40	c1_1		YES			YES									YES
LOC110477150	c1_3	c1_6	c1_15	c1_40		12	8.31657	0.338868	c1_40	c1_40	c1_40	c1_1		YES			YES									YES
HIGD2A	c1_3	c1_6	c1_15	c1_40		11	8.1804	0.349418	c1_40	c1_40	c1_40	c1_1		YES			YES									YES
RPS13	c1_3	c1_6	c1_15	c1_40	c1_1	c1_3	c1_6	c1_15	17	12.5278	0.243152	c1_40	c1_40	c1_40	c1_1		YES			YES									YES
LAMTOR5	c1_3	c1_6	c1_15	c1_40	c1_1	c1_3	c1_6	c1_15	c1_40	28	19.6054	0.147045	c1_40	c1_40	c1_40	c1_1		YES			YES									YES
LOC110481310	c1_3	c1_6	c1_15	c1_41		8	5.37868	0.434795	c1_41	c1_41	c1_41	c1_1		YES			YES									YES
SNRPE	c1_3	c1_6	c1_15	c1_40		4	3.15608	0.851173	c1_40	c1_40	c1_40	c1_1		YES			YES									YES
SNRPG	c1_3	c1_6	c1_15	c1_40		11	7.31885	0.366736	c1_40	c1_40	c1_40	c1_1		YES			YES									YES
LOC110473024	c1_3	c1_6	c1_15	c1_40		6	4.88193	0.610522	c1_40	c1_40	c1_40	c1_1		YES			YES									YES
NDUFB4	c1_3	c1_6	c1_15	c1_41	c1_1	c1_3	c1_6	c1_15	c1_41	25	16.1617	0.166663	c1_41	c1_41	c1_41	c1_1		YES			YES									YES
NDUFA3	c1_3	c1_6	c1_15	c1_40		4	3.19669	0.842214	c1_40	c1_40	c1_40	c1_1		YES			YES									YES
FMC1	c1_3	c1_6	c1_15	c1_40	c1_1	c1_3	c1_6	c1_15	c1_40	16	11.1352	0.25216	c1_40	c1_40	c1_40	c1_1		YES			YES									YES
RPS21	c1_3	c1_6	c1_15	c1_40		4	3.09558	0.848419	c1_40	c1_40	c1_40	c1_1		YES			YES									YES
ATP5PF	c1_3	c1_6	c1_15	c1_40	c1_1	c1_3	c1_6	c1_15	c1_40	19	14.009	0.212938	c1_40	c1_40	c1_40	c1_1		YES			YES									YES
LOC110471034	c1_3	c1_6	c1_15	c1_40		4	2.90876	0.867512	c1_40	c1_40	c1_40	c1_1		YES			YES									YES
RPL36A	c1_3	c1_6	c1_15	c1_40		3	2.51394	1	c1_40	c1_40	c1_40	c1_1		YES			YES									YES
PAM16	c1_3	c1_6	c1_15	c1_40		3	2.37614	1	c1_40	c1_40	c1_40	c1_1		YES			YES									YES
LOC110472298	c1_3	c1_6	c1_15	c1_41		10	7.24359	0.389899	c1_41	c1_41	c1_41	c1_1		YES			YES									YES
LAMTOR2	c1_3	c1_6	c1_15	c1_40	c1_1	c1_3	c1_6	c1_15	c1_40	17	11.0698	0.240373	c1_40	c1_40	c1_40	c1_1		YES			YES									YES
SVBP	c1_3	c1_6	c1_15	c1_40		5	3.57608	0.729373	c1_40	c1_40	c1_40	c1_1		YES			YES									YES
SUPT4H1	c1_3	c1_6	c1_15	c1_40		14	9.50354	0.290706	c1_40	c1_40	c1_40	c1_1		YES			YES									YES
HNRNPR	c1_2	c1_4	c1_9	c1_27	c1_55		13	8.88251	0.311142	c1_55	c1_4	c1_2	c1_1	YES		YES					YES																		YES
ANAPC11	c1_3	c1_6	c1_15	c1_40		4	2.80106	0.850871	c1_40	c1_40	c1_40	c1_1		YES			YES									YES
TRAPPC2L	c1_3	c1_6	c1_15	c1_40		8	5.54811	0.486348	c1_40	c1_40	c1_40	c1_1		YES			YES									YES
LOC110478266	c1_3	c1_6	c1_15	c1_41		7	4.84849	0.506949	c1_41	c1_41	c1_41	c1_1		YES			YES									YES
MRPL17	c1_3	c1_6	c1_15	c1_40		12	7.83034	0.339211	c1_40	c1_40	c1_40	c1_1		YES			YES									YES
SEC61G	c1_3	c1_6	c1_15	c1_40		5	3.62393	0.728089	c1_40	c1_40	c1_40	c1_1		YES			YES									YES
ATP2B2	c1_2	c1_5	c1_13	c1_35	c1_65	c1_1	c1_2	c1_5	c1_13	c1_35	c1_65	51	29.7489	0.0780511	c1_65	c1_35	c1_2	c1_1	YES			YES								YES
COPS9	c1_3	c1_6	c1_15	c1_40		5	3.37374	0.728533	c1_40	c1_40	c1_40	c1_1		YES			YES									YES
NDUFS7	c1_3	c1_6	c1_15	c1_41		10	6.74939	0.401436	c1_41	c1_41	c1_41	c1_1		YES			YES									YES
GRIN1	c1_2	c1_5	c1_13	c1_35	c1_65	c1_1	c1_2	c1_5	c1_13	c1_35	33	19.5258	0.113482	c1_65	c1_35	c1_2	c1_1	YES			YES								YES
ACVR2A	c1_3	c1_6	c1_15	c1_40	c1_1	c1_3	c1_6	c1_15	c1_40	16	9.77824	0.246068	c1_40	c1_40	c1_40	c1_1		YES			YES									YES
FAM20A	c1_2	c1_5	c1_13	c1_34	c1_60	c1_1	c1_2	c1_5	c1_13	c1_34	c1_60	17	10.2805	0.231399	c1_60	c1_60	c1_2	c1_1	YES			YES								YES
RPS18	c1_3	c1_6	c1_15	c1_40		8	4.64924	0.46962	c1_40	c1_40	c1_40	c1_1		YES			YES									YES
APLP2	c1_2	c1_5	c1_13	c1_34	c1_60	c1_1	c1_2	c1_5	c1_13	c1_34	c1_60	28	18.0625	0.142121	c1_60	c1_60	c1_2	c1_1	YES			YES								YES
MPRIP	c1_2	c1_4	c1_9	c1_27	c1_55		12	8.14873	0.329859	c1_55	c1_4	c1_2	c1_1	YES		YES					YES																		YES
RPLP2	c1_3	c1_6	c1_15	c1_41		6	4.08725	0.617737	c1_41	c1_41	c1_41	c1_1		YES			YES									YES
LOC110484385	c1_3	c1_6	c1_15	c1_40	c1_1	c1_3	c1_6	c1_15	c1_40	23	13.587	0.176996	c1_40	c1_40	c1_40	c1_1		YES			YES									YES
AMIGO1	c1_3	c1_6	c1_15	c1_40		14	7.51205	0.269746	c1_40	c1_40	c1_40	c1_1		YES			YES									YES
RPS15A	c1_3	c1_6	c1_15	c1_40		3	2.16289	1	c1_40	c1_40	c1_40	c1_1		YES			YES									YES
LOC110483938	c1_3	c1_6	c1_15	c1_40		8	5.07439	0.485495	c1_40	c1_40	c1_40	c1_1		YES			YES									YES
LOC110483482	c1_3	c1_6	c1_15	c1_40		14	9.03361	0.29373	c1_40	c1_40	c1_40	c1_1		YES			YES									YES
STMP1	c1_3	c1_6	c1_15	c1_40		8	4.98298	0.490332	c1_40	c1_40	c1_40	c1_1		YES			YES									YES
NEDD8	c1_3	c1_6	c1_15	c1_40		4	2.81353	0.851087	c1_40	c1_40	c1_40	c1_1		YES			YES									YES
NDUFS8	c1_3	c1_6	c1_15	c1_40	c1_1	c1_3	c1_6	c1_15	23	14.9707	0.181426	c1_40	c1_40	c1_40	c1_1		YES			YES									YES
LOC110469179	c1_3	c1_6	c1_15	c1_42	c1_72		7	4.40485	0.545666	c1_72	c1_42	c1_42	c1_1		YES			YES									YES
ATP1B2	c1_3	c1_6	c1_15	c1_40		6	4.06625	0.620136	c1_40	c1_40	c1_40	c1_1		YES			YES									YES
PSMB6	c1_3	c1_6	c1_15	c1_40		11	6.33258	0.364386	c1_40	c1_40	c1_40	c1_1		YES			YES									YES
LHFPL6	c1_2	c1_5	c1_13	c1_34	c1_60		10	6.77881	0.36848	c1_60	c1_60	c1_2	c1_1	YES			YES								YES																					YES
TMBIM6	c1_2	c1_4	c1_9	c1_27	c1_55		11	7.48412	0.35485	c1_55	c1_4	c1_2	c1_1	YES		YES					YES																		YES
NCOR2	c1_2	c1_4	c1_9	c1_27	c1_55		10	5.95723	0.400936	c1_55	c1_4	c1_2	c1_1	YES		YES					YES																		YES
ZNF593	c1_3	c1_6	c1_15	c1_42	c1_72	c1_72	9	5.78	0.439053	c1_72	c1_42	c1_42	c1_1		YES			YES									YES
SCD5	c1_2	c1_5	c1_13	c1_34	c1_60	c1_1	c1_2	c1_5	c1_13	c1_34	c1_60	32	17.9662	0.128352	c1_60	c1_60	c1_2	c1_1	YES			YES								YES
SLC35F1	c1_2	c1_4	c1_9	c1_27	c1_55		4	2.54306	0.722169	c1_55	c1_4	c1_2	c1_1	YES		YES					YES																		YES
TBC1D9	c1_2	c1_4	c1_9	c1_27	c1_55	c1_1	c1_2	c1_4	c1_9	c1_27	c1_55	30	19.7372	0.140768	c1_55	c1_4	c1_2	c1_1	YES		YES					YES																		YES
DNM1	c1_2	c1_5	c1_13	c1_34	c1_60	c1_1	c1_2	c1_5	c1_13	c1_34	c1_60	19	11.5618	0.217382	c1_60	c1_60	c1_2	c1_1	YES			YES								YES
RPL29	c1_3	c1_6	c1_15	c1_40		5	3.11888	0.550408	c1_40	c1_40	c1_40	c1_1		YES			YES									YES
PTMA	c1_2	c1_5	c1_13	c1_34	c1_60		9	5.29367	0.398781	c1_60	c1_60	c1_2	c1_1	YES			YES								YES																					YES
CNOT1	c1_2	c1_4	c1_9	c1_27	c1_55		11	7.03384	0.346384	c1_55	c1_4	c1_2	c1_1	YES		YES					YES																		YES
SS18L2	c1_3	c1_6	c1_15	c1_40		4	2.55379	0.851455	c1_40	c1_40	c1_40	c1_1		YES			YES									YES
SOD1	c1_3	c1_6	c1_15	c1_41		4	2.72278	0.850348	c1_41	c1_41	c1_41	c1_1		YES			YES									YES
MRPS18C	c1_3	c1_6	c1_15	c1_40		6	3.85907	0.618546	c1_40	c1_40	c1_40	c1_1		YES			YES									YES
LOC110471035	c1_3	c1_6	c1_15	c1_40		8	5.29202	0.397444	c1_40	c1_40	c1_40	c1_1		YES			YES									YES
SLC25A22	c1_2	c1_5	c1_13	c1_34	c1_60	c1_1	c1_2	c1_5	c1_13	c1_34	c1_60	24	15.1282	0.168698	c1_60	c1_60	c1_2	c1_1	YES			YES								YES
CIRBP	c1_2	c1_4	c1_9	c1_27	c1_55		7	4.7117	0.538406	c1_55	c1_4	c1_2	c1_1	YES		YES					YES																		YES
ARF3	c1_3	c1_6	c1_15	c1_40		10	5.8237	0.338236	c1_40	c1_40	c1_40	c1_1		YES			YES									YES
TXN	c1_3	c1_6	c1_15		7	4.54971	0.539575	NA	NA	NA	c1_1		YES			YES									YES
RAP2A	c1_2	c1_4	c1_9	c1_27	c1_56	c1_78	c1_1	c1_2	15	8.8199	0.26173	c1_78	c1_4	c1_2	c1_1	YES		YES					YES																		YES
HMGN5	c1_2	c1_5	c1_13	c1_34	c1_60	c1_1	c1_2	c1_5	c1_13	c1_34	18	10.2051	0.222492	c1_60	c1_60	c1_2	c1_1	YES			YES								YES
LTO1	c1_2	c1_5	c1_13	c1_34	c1_60	c1_1	c1_2	c1_5	c1_13	19	11.3807	0.211261	c1_60	c1_60	c1_2	c1_1	YES			YES								YES																					YES
TMEM141	c1_3	c1_6	c1_15	c1_40		5	2.91521	0.616477	c1_40	c1_40	c1_40	c1_1		YES			YES									YES
SPTBN1	c1_2	c1_5	c1_13	c1_34	c1_60	c1_1	c1_2	c1_5	c1_13	22	13.701	0.177248	c1_60	c1_60	c1_2	c1_1	YES			YES								YES																					YES
DAPK3	c1_3	c1_6	c1_15	c1_40		5	2.90454	0.637445	c1_40	c1_40	c1_40	c1_1		YES			YES									YES
IL23A	c1_3	c1_6	c1_15	c1_40		6	3.57376	0.623095	c1_40	c1_40	c1_40	c1_1		YES			YES									YES
PHPT1	c1_3	c1_6	c1_15	c1_40		7	4.36334	0.553627	c1_40	c1_40	c1_40	c1_1		YES			YES									YES
LOC110469310	c1_3	c1_6	c1_15	c1_40		3	1.39892	0.614845	c1_40	c1_40	c1_40	c1_1		YES			YES									YES
EEF1AKMT4	c1_2	c1_5	c1_13	c1_34	c1_61		4	2.33748	0.861365	c1_61	c1_61	c1_2	c1_1	YES			YES								YES																					YES
NR2F2	c1_2	c1_5	c1_13	c1_34	c1_60	c1_1	c1_2	c1_5	c1_13	c1_34	34	19.0406	0.125241	c1_60	c1_60	c1_2	c1_1	YES			YES								YES
TIMM10	c1_3	c1_6	c1_15	c1_40		3	2.15682	1	c1_40	c1_40	c1_40	c1_1		YES			YES									YES
SHE	c1_3	c1_6	c1_15	c1_40		3	1.95145	1	c1_40	c1_40	c1_40	c1_1		YES			YES									YES
GPX4	c1_3	c1_6	c1_15	c1_40		5	3.08604	0.72619	c1_40	c1_40	c1_40	c1_1		YES			YES									YES
PPIL1	c1_3	c1_6	c1_15	c1_40		4	2.54394	0.844449	c1_40	c1_40	c1_40	c1_1		YES			YES									YES
POLR3K	c1_3	c1_6	c1_15	c1_40		4	2.60061	0.842317	c1_40	c1_40	c1_40	c1_1		YES			YES									YES
STAT1	c1_2	c1_5	c1_13	c1_34	c1_60		8	4.96387	0.483132	c1_60	c1_60	c1_2	c1_1	YES			YES								YES																					YES
CHST2	c1_2	c1_5	c1_13	c1_34	c1_60		12	6.63496	0.339127	c1_60	c1_60	c1_2	c1_1	YES			YES								YES																					YES
SELENOP	c1_2	c1_5	c1_13	c1_34	c1_60		4	2.02042	0.809201	c1_60	c1_60	c1_2	c1_1	YES			YES								YES																					YES
MRPL34	c1_3	c1_6	c1_15	c1_40		6	3.58603	0.62558	c1_40	c1_40	c1_40	c1_1		YES			YES									YES
VSTM2L	c1_3	c1_6	c1_15	c1_40	c1_1	c1_3	c1_6	c1_15	c1_40	19	11.4478	0.213484	c1_40	c1_40	c1_40	c1_1		YES			YES									YES
DPP6	c1_2	c1_5	c1_13	c1_35	c1_65		9	5.20084	0.442162	c1_65	c1_35	c1_2	c1_1	YES			YES								YES																						YES
PLXNB1	c1_2	c1_4	c1_9	c1_27	c1_55		7	4.1121	0.509613	c1_55	c1_4	c1_2	c1_1	YES		YES					YES																		YES
RPS28	c1_3	c1_6	c1_15	c1_40	c1_1	c1_3	c1_6	c1_15	c1_40	15	9.00874	0.269138	c1_40	c1_40	c1_40	c1_1		YES			YES									YES
PRKCE	c1_2	c1_5	c1_13	c1_34	c1_60		8	4.7032	0.482733	c1_60	c1_60	c1_2	c1_1	YES			YES								YES																					YES
NR2F1	c1_2	c1_5	c1_13	c1_34	c1_60		4	2.64192	0.836826	c1_60	c1_60	c1_2	c1_1	YES			YES								YES																					YES
CRIM1	c1_2	c1_5	c1_13	c1_34	c1_60		4	2.55199	0.846768	c1_60	c1_60	c1_2	c1_1	YES			YES								YES																					YES
SNRNP25	c1_3	c1_6	c1_15	c1_40		4	2.54192	0.705108	c1_40	c1_40	c1_40	c1_1		YES			YES									YES
LOC110484266	c1_3	c1_6	c1_15	c1_40		3	2.06418	1	c1_40	c1_40	c1_40	c1_1		YES			YES									YES
RPL10A	c1_3	c1_6	c1_15	c1_42	c1_72		4	2.494	0.836538	c1_72	c1_42	c1_42	c1_1		YES			YES									YES
SIX2	c1_2	c1_5	c1_13	c1_35	c1_65		9	5.15357	0.419235	c1_65	c1_35	c1_2	c1_1	YES			YES								YES																						YES
DYNC1LI2	c1_2	c1_5	c1_13	c1_34	c1_60		6	3.79766	0.617127	c1_60	c1_60	c1_2	c1_1	YES			YES								YES																					YES
PFDN5	c1_3	c1_6	c1_15	c1_42	c1_73		5	3.01649	0.711573	c1_73	c1_42	c1_42	c1_1		YES			YES									YES
RPL18	c1_3	c1_6	c1_15	c1_41		3	1.83902	1	c1_41	c1_41	c1_41	c1_1		YES			YES									YES
GRM4	c1_2	c1_5	c1_14	c1_38	c1_67	c1_1	c1_2	c1_5	c1_14	c1_38	c1_67	24	12.0093	0.167354	c1_67	c1_14	c1_2	c1_1	YES			YES									YES
CRMP1	c1_2	c1_5	c1_13	c1_34	c1_60		14	7.82775	0.296942	c1_60	c1_60	c1_2	c1_1	YES			YES								YES																					YES
MPC2	c1_3	c1_6	c1_15	c1_41		5	3.46488	0.716225	c1_41	c1_41	c1_41	c1_1		YES			YES									YES
EPB41L1	c1_2	c1_5	c1_13	c1_34	c1_61		12	6.97456	0.336505	c1_61	c1_61	c1_2	c1_1	YES			YES								YES																					YES
DDRGK1	c1_3	c1_7	c1_19	c1_50		13	6.48311	0.291389	c1_50	c1_7	c1_7	c1_1		YES				YES												YES
LOC110481429	c1_3	c1_6	c1_15	c1_40		13	7.08983	0.273728	c1_40	c1_40	c1_40	c1_1		YES			YES									YES
FBXW7	c1_2	c1_5	c1_13	c1_34	c1_60		9	4.73929	0.445948	c1_60	c1_60	c1_2	c1_1	YES			YES								YES																					YES
ELOB	c1_3	c1_6	c1_15	c1_40	c1_1	c1_3	c1_6	c1_15	c1_40	16	9.34399	0.243099	c1_40	c1_40	c1_40	c1_1		YES			YES									YES
SMAP2	c1_2	c1_5	c1_13	c1_34	c1_60		7	4.38022	0.531306	c1_60	c1_60	c1_2	c1_1	YES			YES								YES																					YES
JAGN1	c1_3	c1_6	c1_15	c1_40		10	5.12428	0.35541	c1_40	c1_40	c1_40	c1_1		YES			YES									YES
MGP	c1_3	c1_6	c1_15	c1_40		3	2.04415	1	c1_40	c1_40	c1_40	c1_1		YES			YES									YES
TSPAN7	c1_2	c1_5	c1_14	c1_38	c1_67	c1_1	c1_2	c1_5	c1_14	c1_38	c1_67	33	16.3513	0.116968	c1_67	c1_14	c1_2	c1_1	YES			YES									YES
RPL31	c1_3	c1_6	c1_15	c1_41		8	4.82149	0.483639	c1_41	c1_41	c1_41	c1_1		YES			YES									YES
ZMAT5	c1_3	c1_6	c1_15	c1_41		4	2.56003	0.845975	c1_41	c1_41	c1_41	c1_1		YES			YES									YES
LOC110481878	c1_3	c1_6	c1_15	c1_40		4	2.45764	0.849622	c1_40	c1_40	c1_40	c1_1		YES			YES									YES
DDX17	c1_2	c1_5	c1_13	c1_34	c1_60	c1_1	c1_2	c1_5	c1_13	c1_34	17	9.65119	0.243291	c1_60	c1_60	c1_2	c1_1	YES			YES								YES
PXK	c1_2	c1_5	c1_13	c1_35	c1_65		10	5.40484	0.361354	c1_65	c1_35	c1_2	c1_1	YES			YES								YES																						YES
ITPA	c1_3	c1_6	c1_15	c1_40		6	3.45633	0.563341	c1_40	c1_40	c1_40	c1_1		YES			YES									YES
SERP1	c1_3	c1_6	c1_15	c1_40		5	2.93502	0.544789	c1_40	c1_40	c1_40	c1_1		YES			YES									YES
LOC110481276	c1_3	c1_6	c1_15	c1_40		9	5.36495	0.434779	c1_40	c1_40	c1_40	c1_1		YES			YES									YES
CRHBP	c1_3	c1_6	c1_17	c1_47	c1_74	c1_1	c1_3	c1_6	c1_17	c1_47	c1_74	19	9.37238	0.192144	c1_74	c1_17	c1_17	c1_1		YES			YES											YES
DIP2B	c1_2	c1_5	c1_13		5	2.86474	0.730176	NA	NA	c1_2	c1_1	YES			YES								YES
MRPS12	c1_3	c1_6	c1_15	c1_40		8	5.01379	0.456595	c1_40	c1_40	c1_40	c1_1		YES			YES									YES
GRM5	c1_2	c1_5	c1_13	c1_34	c1_60		8	4.65556	0.480228	c1_60	c1_60	c1_2	c1_1	YES			YES								YES																					YES
PTPRS	c1_2	c1_4	c1_9	c1_28		7	4.51652	0.528936	c1_28	c1_4	c1_2	c1_1	YES		YES					YES																			YES
LOC116183241	c1_3	c1_6	c1_15	c1_41		4	2.25561	0.713513	c1_41	c1_41	c1_41	c1_1		YES			YES									YES
TMEM272	c1_3	c1_8	c1_22		7	3.68112	0.544972	c1_22	c1_8	c1_8	c1_1		YES					YES														YES
NDUFA13	c1_2	c1_5	c1_14	c1_38	c1_67		5	2.66705	0.438005	c1_67	c1_14	c1_2	c1_1	YES			YES									YES																							YES
SPRY1	c1_2	c1_5	c1_13	c1_34	c1_60		5	3.18509	0.70767	c1_60	c1_60	c1_2	c1_1	YES			YES								YES																					YES
SLC35A1	c1_2	c1_4	c1_9	c1_27	c1_55		7	4.03647	0.547272	c1_55	c1_4	c1_2	c1_1	YES		YES					YES																		YES
SPON1	c1_2	c1_5	c1_13	c1_35	c1_65		14	7.95259	0.285979	c1_65	c1_35	c1_2	c1_1	YES			YES								YES																						YES
VPS50	c1_2	c1_4	c1_9	c1_27	c1_55		11	6.44398	0.350202	c1_55	c1_4	c1_2	c1_1	YES		YES					YES																		YES
GID8	c1_2	c1_5	c1_13	c1_34		5	3.01108	0.714446	NA	NA	c1_2	c1_1	YES			YES								YES																					YES
KLC4	c1_3	c1_6	c1_15	c1_40		8	4.26858	0.487096	c1_40	c1_40	c1_40	c1_1		YES			YES									YES
CTTN	c1_2	c1_4	c1_9	c1_27	c1_52		6	3.47778	0.622566	c1_52	c1_4	c1_2	c1_1	YES		YES					YES																		YES
LOC110481534	c1_3	c1_6	c1_15	c1_40		8	4.40234	0.45356	c1_40	c1_40	c1_40	c1_1		YES			YES									YES
CISH	c1_2	c1_5	c1_14	c1_38	c1_67	c1_1	c1_2	c1_5	c1_14	c1_38	c1_67	16	8.02659	0.234972	c1_67	c1_14	c1_2	c1_1	YES			YES									YES
HCN1	c1_2	c1_5	c1_13	c1_34	c1_60		3	1.73431	1	c1_60	c1_60	c1_2	c1_1	YES			YES								YES																					YES
TOP1	c1_3	c1_7	c1_19	c1_50	c1_1	c1_3	c1_7	c1_19	c1_50	33	18.2126	0.120522	c1_50	c1_7	c1_7	c1_1		YES				YES												YES
ATP8A2	c1_2	c1_4	c1_9	c1_27	c1_52		7	4.04636	0.539924	c1_52	c1_4	c1_2	c1_1	YES		YES					YES																		YES
TMEM200A	c1_2	c1_4	c1_9	c1_27	c1_55		5	2.85412	0.428491	c1_55	c1_4	c1_2	c1_1	YES		YES					YES																		YES
CIAO2B	c1_3	c1_6	c1_15	c1_41		8	5.79564	0.480417	c1_41	c1_41	c1_41	c1_1		YES			YES									YES
SPOCK2	c1_2	c1_4	c1_9	c1_27	c1_55		10	5.99281	0.399173	c1_55	c1_4	c1_2	c1_1	YES		YES					YES																		YES
NUCKS1	c1_3	c1_7	c1_19	c1_50	c1_1	c1_3	15	7.79095	0.239346	c1_50	c1_7	c1_7	c1_1		YES				YES												YES
YKT6	c1_3	c1_8	c1_22		14	6.48728	0.218048	c1_22	c1_8	c1_8	c1_1		YES					YES														YES
NIP7	c1_3	c1_6	c1_15	c1_40		6	3.265	0.618911	c1_40	c1_40	c1_40	c1_1		YES			YES									YES
CORT	c1_3	c1_8	c1_22		11	5.63618	0.314222	c1_22	c1_8	c1_8	c1_1		YES					YES														YES
SLC36A4	c1_3	c1_6	c1_15	c1_40		4	1.97913	0.639827	c1_40	c1_40	c1_40	c1_1		YES			YES									YES
NSA2	c1_3	c1_7	c1_19	c1_50	c1_1	c1_3	c1_7	c1_19	c1_50	22	11.393	0.182207	c1_50	c1_7	c1_7	c1_1		YES				YES												YES
LOC110483411	c1_3	c1_7	c1_19	c1_50		8	4.3128	0.379168	c1_50	c1_7	c1_7	c1_1		YES				YES												YES
PCBP2	c1_2	c1_5	c1_13	c1_35	c1_66		7	3.51632	0.427884	c1_66	c1_35	c1_2	c1_1	YES			YES								YES																						YES
POLR2G	c1_3	c1_6	c1_15	c1_40		7	3.67569	0.433326	c1_40	c1_40	c1_40	c1_1		YES			YES									YES
HSD3B7	c1_3	c1_7	c1_19	c1_50		12	6.21918	0.279187	c1_50	c1_7	c1_7	c1_1		YES				YES												YES
SNX13	c1_2	c1_5	c1_13	c1_34	c1_60	c1_1	c1_2	c1_5	c1_13	c1_34	c1_60	39	22.5683	0.107164	c1_60	c1_60	c1_2	c1_1	YES			YES								YES
DLAT	c1_2	c1_4	c1_9	c1_28		8	4.14152	0.460008	c1_28	c1_4	c1_2	c1_1	YES		YES					YES																			YES
DPCD	c1_3	c1_6	c1_15	c1_41		4	2.13664	0.556289	c1_41	c1_41	c1_41	c1_1		YES			YES									YES
MAP7D2	c1_2	c1_4	c1_9	c1_27	c1_55		5	3.07646	0.629677	c1_55	c1_4	c1_2	c1_1	YES		YES					YES																		YES
LOC110467900	c1_2	c1_5	c1_13	c1_34	c1_60		5	3.11489	0.709642	c1_60	c1_60	c1_2	c1_1	YES			YES								YES																					YES
LAPTM4A	c1_2	c1_4	c1_9	c1_27	c1_55	c1_1	c1_2	c1_4	c1_9	21	11.1472	0.19272	c1_55	c1_4	c1_2	c1_1	YES		YES					YES																		YES
REC114	c1_2	c1_4	c1_9	c1_27	c1_55		14	8.91279	0.288306	c1_55	c1_4	c1_2	c1_1	YES		YES					YES																		YES
ANAPC13	c1_3	c1_6	c1_15	c1_41		4	2.53913	0.834271	c1_41	c1_41	c1_41	c1_1		YES			YES									YES
UBXN4	c1_2	c1_4	c1_9	c1_27	c1_55		4	2.10193	0.714619	c1_55	c1_4	c1_2	c1_1	YES		YES					YES																		YES
PBX1	c1_2	c1_5	c1_13	c1_34	c1_61		10	5.81269	0.372493	c1_61	c1_61	c1_2	c1_1	YES			YES								YES																					YES
GNG7	c1_3	c1_7	c1_19	c1_50	c1_1	15	8.30337	0.259728	c1_50	c1_7	c1_7	c1_1		YES				YES												YES
TESC	c1_3	c1_6	c1_15	c1_41		9	4.74199	0.40794	c1_41	c1_41	c1_41	c1_1		YES			YES									YES
CRYAB	c1_3	c1_6	c1_15	c1_41		4	2.26506	0.545953	c1_41	c1_41	c1_41	c1_1		YES			YES									YES
GSTK1	c1_3	c1_6	c1_16		2	1.02203	0	c1_16	c1_16	c1_16	c1_1		YES			YES										YES
VAPA	c1_2	c1_5	c1_13	c1_34	c1_60		13	7.68189	0.302656	c1_60	c1_60	c1_2	c1_1	YES			YES								YES																					YES
LOC110470063	c1_3	c1_6	c1_16		10	4.98095	0.278211	c1_16	c1_16	c1_16	c1_1		YES			YES										YES
SLITRK5	c1_2	c1_5	c1_13	c1_35	c1_65		4	2.35831	0.834245	c1_65	c1_35	c1_2	c1_1	YES			YES								YES																						YES
LPGAT1	c1_2	c1_4	c1_9	c1_29		4	2.21289	0.849161	c1_29	c1_4	c1_2	c1_1	YES		YES					YES																				YES
LOC110475732	c1_3	c1_6	c1_15	c1_40		5	2.7522	0.634061	c1_40	c1_40	c1_40	c1_1		YES			YES									YES
RPS12	c1_3	c1_6	c1_15	c1_40		6	4.65637	0.60782	c1_40	c1_40	c1_40	c1_1		YES			YES									YES
MAP7D1	c1_3	c1_6	c1_15	c1_40		11	5.57407	0.249769	c1_40	c1_40	c1_40	c1_1		YES			YES									YES
MTNR1B	c1_3	c1_6	c1_17	c1_47	c1_74		12	6.30507	0.293464	c1_74	c1_17	c1_17	c1_1		YES			YES											YES
TRIM8	c1_2	c1_5	c1_13	c1_34	c1_60		4	2.35567	0.844437	c1_60	c1_60	c1_2	c1_1	YES			YES								YES																					YES
PRELP	c1_2	c1_5	c1_13	c1_34	c1_60		4	2.21177	0.680828	c1_60	c1_60	c1_2	c1_1	YES			YES								YES																					YES
GNB1	c1_2	c1_5	c1_13	c1_34	c1_62	c1_80		8	4.57658	0.443989	c1_80	c1_62	c1_2	c1_1	YES			YES								YES																					YES
GNG5	c1_3	c1_6	c1_15	c1_40		5	2.99524	0.712913	c1_40	c1_40	c1_40	c1_1		YES			YES									YES
PLAC9	c1_3	c1_6	c1_15	c1_40		5	2.74925	0.709644	c1_40	c1_40	c1_40	c1_1		YES			YES									YES
LOC116183814	c1_2	c1_5	c1_13	c1_34	c1_60		7	3.77493	0.510932	c1_60	c1_60	c1_2	c1_1	YES			YES								YES																					YES
TP53INP2	c1_2	c1_5	c1_13	c1_34	c1_60		4	2.47617	0.843103	c1_60	c1_60	c1_2	c1_1	YES			YES								YES																					YES
LOC110478878	c1_2	c1_4	c1_9	c1_27	c1_55		5	2.64062	0.722746	c1_55	c1_4	c1_2	c1_1	YES		YES					YES																		YES
NR2C2AP	c1_3	c1_6	c1_15	c1_40		4	2.42118	0.837186	c1_40	c1_40	c1_40	c1_1		YES			YES									YES
GCC2	c1_3	c1_7	c1_20		13	6.40953	0.274555	c1_20	c1_7	c1_7	c1_1		YES				YES													YES
CD24	c1_2	c1_5	c1_13	c1_34	c1_62	c1_80		6	3.53852	0.608387	c1_80	c1_62	c1_2	c1_1	YES			YES								YES																					YES
BHLHE41	c1_2	c1_5	c1_13	c1_35	c1_65		8	4.73082	0.476403	c1_65	c1_35	c1_2	c1_1	YES			YES								YES																						YES
ANKRD17	c1_2	c1_4	c1_9	c1_28	c1_28	13	7.31044	0.309883	c1_28	c1_4	c1_2	c1_1	YES		YES					YES																			YES
LOC110472499	c1_3	c1_6	c1_15	c1_40		5	2.72793	0.530262	c1_40	c1_40	c1_40	c1_1		YES			YES									YES
LOC110470530	c1_3	c1_6	c1_15	c1_40		13	6.75321	0.27421	c1_40	c1_40	c1_40	c1_1		YES			YES									YES
EMC4	c1_3	c1_6	c1_15	c1_40		4	2.33461	0.547897	c1_40	c1_40	c1_40	c1_1		YES			YES									YES
TMTC4	c1_2	c1_4	c1_9	c1_28		4	2.26152	0.840773	c1_28	c1_4	c1_2	c1_1	YES		YES					YES																			YES
RSRC2	c1_3	c1_7	c1_19	c1_50		9	4.4993	0.339359	c1_50	c1_7	c1_7	c1_1		YES				YES												YES
LOC110471218	c1_3	c1_6	c1_15	c1_40		5	2.94666	0.629937	c1_40	c1_40	c1_40	c1_1		YES			YES									YES
IDNK	c1_2	c1_5	c1_13	c1_35	c1_65		7	3.53465	0.444788	c1_65	c1_35	c1_2	c1_1	YES			YES								YES																						YES
SRGAP2	c1_2	c1_5	c1_13	c1_34	c1_60		3	1.90757	1	c1_60	c1_60	c1_2	c1_1	YES			YES								YES																					YES
CBX1	c1_2	c1_5	c1_13	c1_34	c1_60		3	2.33785	1	c1_60	c1_60	c1_2	c1_1	YES			YES								YES																					YES
STARD7	c1_3	c1_7	c1_19	c1_50		5	2.74718	0.608593	c1_50	c1_7	c1_7	c1_1		YES				YES												YES
LOC110469188	c1_2	c1_4	c1_9	c1_27	c1_55	c1_1	c1_2	16	8.60092	0.224194	c1_55	c1_4	c1_2	c1_1	YES		YES					YES																		YES
APOA1	c1_3	c1_6	c1_15	c1_40		4	2.28566	0.826498	c1_40	c1_40	c1_40	c1_1		YES			YES									YES
FAM136A	c1_3	c1_6	c1_15	c1_40		3	2.00438	1	c1_40	c1_40	c1_40	c1_1		YES			YES									YES
HYPK	c1_3	c1_6	c1_15	c1_40		9	5.20617	0.38699	c1_40	c1_40	c1_40	c1_1		YES			YES									YES
CASK	c1_2	c1_5	c1_13	c1_35	c1_65		11	5.53468	0.348566	c1_65	c1_35	c1_2	c1_1	YES			YES								YES																						YES
KCNS1	c1_3	c1_6	c1_17	c1_47	c1_75		14	6.95769	0.242084	c1_75	c1_17	c1_17	c1_1		YES			YES											YES
LPL	c1_2	c1_5	c1_13	c1_34	c1_62	c1_81		6	3.51534	0.599853	c1_81	c1_62	c1_2	c1_1	YES			YES								YES																					YES
FABP7	c1_3	c1_6	c1_17	c1_47	c1_74	c1_1	c1_3	c1_6	17	9.3184	0.226548	c1_74	c1_17	c1_17	c1_1		YES			YES											YES
PNISR	c1_3	c1_7	c1_19	c1_50		5	2.79693	0.716919	c1_50	c1_7	c1_7	c1_1		YES				YES												YES
SEC16A	c1_2	c1_4	c1_9	c1_27	c1_56	c1_78		5	2.91109	0.70259	c1_78	c1_4	c1_2	c1_1	YES		YES					YES																		YES
BSG	c1_2	c1_5	c1_13	c1_34	c1_60		7	3.84077	0.536853	c1_60	c1_60	c1_2	c1_1	YES			YES								YES																					YES
SAMD8	c1_2	c1_5	c1_13	c1_35	c1_65		8	4.26622	0.436687	c1_65	c1_35	c1_2	c1_1	YES			YES								YES																						YES
NEUROD1	c1_2	c1_4	c1_9	c1_28		8	4.32389	0.480095	c1_28	c1_4	c1_2	c1_1	YES		YES					YES																			YES
DDX23	c1_3	c1_6	c1_15		1	0.644658	NaN	NA	NA	NA	c1_1		YES			YES									YES
SV2A	c1_3	c1_7	c1_20		14	7.74801	0.275331	c1_20	c1_7	c1_7	c1_1		YES				YES													YES
TBC1D10A	c1_2	c1_5	c1_13		7	3.14969	0.453504	NA	NA	c1_2	c1_1	YES			YES								YES
TNRC6C	c1_2	c1_5	c1_13	c1_34	c1_61		6	3.13558	0.616293	c1_61	c1_61	c1_2	c1_1	YES			YES								YES																					YES
TMCO6	c1_3	c1_6	c1_15	c1_40		3	1.72561	1	c1_40	c1_40	c1_40	c1_1		YES			YES									YES
MED31	c1_3	c1_6	c1_15	c1_40		4	2.51127	0.843332	c1_40	c1_40	c1_40	c1_1		YES			YES									YES
GABARAP	c1_3	c1_6	c1_15	c1_40		6	3.88629	0.624261	c1_40	c1_40	c1_40	c1_1		YES			YES									YES
TMEM248	c1_2	c1_5	c1_13	c1_34	c1_60		6	3.24735	0.608834	c1_60	c1_60	c1_2	c1_1	YES			YES								YES																					YES
GLUD1	c1_2	c1_4	c1_9	c1_27	c1_55		8	4.18576	0.344718	c1_55	c1_4	c1_2	c1_1	YES		YES					YES																		YES
SPPL3	c1_2	c1_4	c1_9	c1_27	c1_55		6	3.11438	0.612103	c1_55	c1_4	c1_2	c1_1	YES		YES					YES																		YES
RPL11	c1_3	c1_6	c1_15	c1_40		6	3.23201	0.510998	c1_40	c1_40	c1_40	c1_1		YES			YES									YES
GPM6A	c1_2	c1_4	c1_9	c1_27	c1_55		12	6.44657	0.301502	c1_55	c1_4	c1_2	c1_1	YES		YES					YES																		YES
RPS3A	c1_3	c1_6	c1_15	c1_43		4	1.9949	0.858378	c1_43	c1_43	c1_43	c1_1		YES			YES									YES
RHEB	c1_2	c1_4	c1_9	c1_27	c1_55		10	5.07387	0.399025	c1_55	c1_4	c1_2	c1_1	YES		YES					YES																		YES
CRACD	c1_3	c1_7	c1_19	c1_50		13	6.89499	0.269788	c1_50	c1_7	c1_7	c1_1		YES				YES												YES
AP3D1	c1_3	c1_7	c1_19	c1_50		9	4.76876	0.408202	c1_50	c1_7	c1_7	c1_1		YES				YES												YES
STRIP1	c1_3	c1_6	c1_15	c1_41		6	2.98165	0.348418	c1_41	c1_41	c1_41	c1_1		YES			YES									YES
TAX1BP1	c1_3	c1_7	c1_19	c1_50	c1_1	c1_3	c1_7	c1_19	c1_50	16	8.47093	0.255373	c1_50	c1_7	c1_7	c1_1		YES				YES												YES
TMEM59L	c1_3	c1_6	c1_15	c1_40		4	2.00866	0.855531	c1_40	c1_40	c1_40	c1_1		YES			YES									YES
MICU3	c1_2	c1_5	c1_13	c1_35	c1_65		8	4.63533	0.483398	c1_65	c1_35	c1_2	c1_1	YES			YES								YES																						YES
SIN3A	c1_2	c1_4	c1_9	c1_27	c1_55		10	5.59026	0.397255	c1_55	c1_4	c1_2	c1_1	YES		YES					YES																		YES
BCAN	c1_3	c1_6	c1_15	c1_40		6	3.03167	0.624388	c1_40	c1_40	c1_40	c1_1		YES			YES									YES
TWF2	c1_3	c1_6	c1_15	c1_40		8	4.00621	0.480852	c1_40	c1_40	c1_40	c1_1		YES			YES									YES
SAT1	c1_3	c1_6	c1_15	c1_40		5	2.74121	0.719124	c1_40	c1_40	c1_40	c1_1		YES			YES									YES
AK1	c1_3	c1_6	c1_17	c1_47	c1_76		13	6.63079	0.243049	c1_76	c1_17	c1_17	c1_1		YES			YES											YES
RTN3	c1_3	c1_6	c1_15	c1_40		5	2.96768	0.694818	c1_40	c1_40	c1_40	c1_1		YES			YES									YES
AHCYL1	c1_3	c1_6	c1_15	c1_40		3	1.83423	1	c1_40	c1_40	c1_40	c1_1		YES			YES									YES
RPS17	c1_3	c1_6	c1_15	c1_40	c1_1	c1_3	c1_6	c1_15	c1_40	20	12.8059	0.218986	c1_40	c1_40	c1_40	c1_1		YES			YES									YES
DOCK4	c1_2	c1_4	c1_9	c1_27	c1_56	c1_79		7	3.3586	0.195645	c1_79	c1_4	c1_2	c1_1	YES		YES					YES																		YES
EEF2	c1_3	c1_7	c1_19	c1_50		5	2.80142	0.417922	c1_50	c1_7	c1_7	c1_1		YES				YES												YES
SOX9	c1_2	c1_4	c1_9	c1_28		6	3.25998	0.601501	c1_28	c1_4	c1_2	c1_1	YES		YES					YES																			YES
ACBD7	c1_3	c1_6	c1_15	c1_41		5	3.4366	0.703743	c1_41	c1_41	c1_41	c1_1		YES			YES									YES
APBA2	c1_2	c1_5	c1_13	c1_35	c1_65		7	3.77898	0.506964	c1_65	c1_35	c1_2	c1_1	YES			YES								YES																						YES
NFIB	c1_3	c1_6	c1_16	c1_1	c1_3	c1_6	17	8.1685	0.207031	c1_16	c1_16	c1_16	c1_1		YES			YES										YES
EDEM3	c1_2	c1_4	c1_9	c1_27	c1_55		4	2.1539	0.493761	c1_55	c1_4	c1_2	c1_1	YES		YES					YES																		YES
POLR2F	c1_3	c1_6	c1_15	c1_41		7	3.91589	0.361988	c1_41	c1_41	c1_41	c1_1		YES			YES									YES
RABGAP1	c1_2	c1_5	c1_13	c1_34	c1_60		10	5.0818	0.392443	c1_60	c1_60	c1_2	c1_1	YES			YES								YES																					YES
MRPS15	c1_3	c1_6	c1_15	c1_42	c1_73		7	3.78069	0.490874	c1_73	c1_42	c1_42	c1_1		YES			YES									YES
LMTK2	c1_2	c1_5	c1_13	c1_35	c1_65		6	3.18143	0.617308	c1_65	c1_35	c1_2	c1_1	YES			YES								YES																						YES
CSDE1	c1_2	c1_5	c1_13	c1_34	c1_60		3	1.71502	1	c1_60	c1_60	c1_2	c1_1	YES			YES								YES																					YES
MEF2D	c1_2	c1_5	c1_13	c1_35	c1_65		10	5.41412	0.39	c1_65	c1_35	c1_2	c1_1	YES			YES								YES																						YES
SNX1	c1_2	c1_4	c1_9	c1_27	c1_55		5	3.08676	0.722919	c1_55	c1_4	c1_2	c1_1	YES		YES					YES																		YES
LGALS1	c1_3	c1_6	c1_15	c1_41		4	2.15175	0.855921	c1_41	c1_41	c1_41	c1_1		YES			YES									YES
PMVK	c1_3	c1_6	c1_15	c1_40		4	2.49718	0.845299	c1_40	c1_40	c1_40	c1_1		YES			YES									YES
SHOC2	c1_2	c1_4	c1_9	c1_27		8	4.61396	0.440542	NA	c1_4	c1_2	c1_1	YES		YES					YES																		YES
SGTA	c1_2	c1_4	c1_9	c1_27		3	1.63962	1	NA	c1_4	c1_2	c1_1	YES		YES					YES																		YES
CHD4	c1_3	c1_7	c1_19	c1_50	c1_1	c1_3	15	7.83093	0.266276	c1_50	c1_7	c1_7	c1_1		YES				YES												YES
MRPS24	c1_3	c1_6	c1_15	c1_43		6	2.9526	0.545052	c1_43	c1_43	c1_43	c1_1		YES			YES									YES
MAFB	c1_2	c1_5	c1_13	c1_35	c1_65		12	6.88206	0.309184	c1_65	c1_35	c1_2	c1_1	YES			YES								YES																						YES
ZBTB18	c1_2	c1_5	c1_14	c1_38	c1_67	c1_1	c1_2	c1_5	c1_14	c1_38	18	9.2316	0.200151	c1_67	c1_14	c1_2	c1_1	YES			YES									YES
AEBP2	c1_2	c1_5	c1_13	c1_34	c1_60		6	3.24859	0.497099	c1_60	c1_60	c1_2	c1_1	YES			YES								YES																					YES
PPP1R15B	c1_2	c1_5	c1_13	c1_34	c1_60		4	2.42422	0.835213	c1_60	c1_60	c1_2	c1_1	YES			YES								YES																					YES
S100A10	c1_3	c1_6	c1_15	c1_40		4	2.20037	0.547238	c1_40	c1_40	c1_40	c1_1		YES			YES									YES
MAPRE3	c1_3	c1_6	c1_15	c1_40		4	2.18239	0.683473	c1_40	c1_40	c1_40	c1_1		YES			YES									YES
ZHX3	c1_2	c1_5	c1_13	c1_34	c1_61		4	2.59313	0.861204	c1_61	c1_61	c1_2	c1_1	YES			YES								YES																					YES
STC1	c1_3	c1_6	c1_17	c1_47	c1_74		5	2.46506	0.330986	c1_74	c1_17	c1_17	c1_1		YES			YES											YES
LOC110483618	c1_2	c1_4	c1_9	c1_27		6	2.78129	0.570599	NA	c1_4	c1_2	c1_1	YES		YES					YES																		YES
MRPS21	c1_3	c1_6	c1_15	c1_40		14	8.09998	0.265983	c1_40	c1_40	c1_40	c1_1		YES			YES									YES
CHGB	c1_3	c1_6	c1_17	c1_47	c1_74		7	3.90986	0.493045	c1_74	c1_17	c1_17	c1_1		YES			YES											YES
LOC110483999	c1_3	c1_6	c1_15	c1_41		8	4.06072	0.342561	c1_41	c1_41	c1_41	c1_1		YES			YES									YES
CAMK2N1	c1_2	c1_5	c1_13	c1_34	c1_60		5	2.64893	0.524805	c1_60	c1_60	c1_2	c1_1	YES			YES								YES																					YES
PODXL	c1_2	c1_5	c1_14	c1_38	c1_67		6	2.86007	0.604502	c1_67	c1_14	c1_2	c1_1	YES			YES									YES																							YES
LOC110468182	c1_3	c1_6	c1_17	c1_49		12	6.40719	0.249444	c1_49	c1_17	c1_17	c1_1		YES			YES											YES
LOC110470685	c1_2	c1_4	c1_9	c1_27	c1_58		5	2.64343	0.714591	c1_58	c1_4	c1_2	c1_1	YES		YES					YES																		YES
MMP15	c1_3	c1_6	c1_15	c1_40		3	1.8006	1	c1_40	c1_40	c1_40	c1_1		YES			YES									YES
ACP1	c1_3	c1_7	c1_19	c1_50		7	3.89133	0.526198	c1_50	c1_7	c1_7	c1_1		YES				YES												YES
PCP4	c1_3	c1_6	c1_15		7	3.60885	0.381699	NA	NA	NA	c1_1		YES			YES									YES
EMX2	c1_2	c1_4	c1_9	c1_27	c1_52		8	4.34682	0.446463	c1_52	c1_4	c1_2	c1_1	YES		YES					YES																		YES
RPLP1	c1_3	c1_6	c1_15	c1_40		8	3.86493	0.47971	c1_40	c1_40	c1_40	c1_1		YES			YES									YES
NACC2	c1_2	c1_4	c1_9	c1_30		5	2.92254	0.698126	c1_30	c1_4	c1_2	c1_1	YES		YES					YES																					YES
LOC110480216	c1_2	c1_5	c1_13	c1_34	c1_62	c1_81	c1_81	5	2.65557	0.616792	c1_81	c1_62	c1_2	c1_1	YES			YES								YES																					YES
PCLO	c1_3	c1_7	c1_20		10	4.92973	0.305501	c1_20	c1_7	c1_7	c1_1		YES				YES													YES
LOC116184166	c1_3	c1_6	c1_15	c1_40		6	2.92044	0.566905	c1_40	c1_40	c1_40	c1_1		YES			YES									YES
PPME1	c1_3	c1_6	c1_17	c1_49		12	5.46669	0.292376	c1_49	c1_17	c1_17	c1_1		YES			YES											YES
SYAP1	c1_3	c1_7	c1_20		11	5.08912	0.205422	c1_20	c1_7	c1_7	c1_1		YES				YES													YES
THY1	c1_3	c1_6	c1_15	c1_46		14	6.72946	0.257742	c1_46	c1_46	c1_46	c1_1		YES			YES									YES
RBBP4	c1_2	c1_4	c1_9	c1_27	c1_56	c1_78		6	2.90663	0.572845	c1_78	c1_4	c1_2	c1_1	YES		YES					YES																		YES
ULK1	c1_2	c1_5	c1_13	c1_35	c1_65		8	3.7677	0.381956	c1_65	c1_35	c1_2	c1_1	YES			YES								YES																						YES
TIMM44	c1_3	c1_7	c1_19	c1_50		7	3.51548	0.534745	c1_50	c1_7	c1_7	c1_1		YES				YES												YES
SSBP3	c1_2	c1_4	c1_9	c1_27	c1_55		3	1.64687	1	c1_55	c1_4	c1_2	c1_1	YES		YES					YES																		YES
ACVR1	c1_2	c1_5	c1_13	c1_34	c1_60		4	2.19502	0.516529	c1_60	c1_60	c1_2	c1_1	YES			YES								YES																					YES
TMBIM4	c1_2	c1_4	c1_9		3	1.57148	1	NA	c1_4	c1_2	c1_1	YES		YES					YES
CDKL5	c1_2	c1_5	c1_13	c1_34		4	1.99347	0.861248	NA	NA	c1_2	c1_1	YES			YES								YES																					YES
LOC110475364	c1_2	c1_5	c1_13	c1_35	c1_65		11	5.02851	0.30666	c1_65	c1_35	c1_2	c1_1	YES			YES								YES																						YES
FAF1	c1_2	c1_5	c1_13	c1_34	c1_60		5	2.93888	0.688457	c1_60	c1_60	c1_2	c1_1	YES			YES								YES																					YES
LOC110472880	c1_2	c1_5	c1_13	c1_35	c1_65		4	2.06216	0.849199	c1_65	c1_35	c1_2	c1_1	YES			YES								YES																						YES
DNAJB6	c1_2	c1_5	c1_13	c1_34	c1_60		3	1.75866	1	c1_60	c1_60	c1_2	c1_1	YES			YES								YES																					YES
LOC110467883	c1_2	c1_5	c1_13	c1_34	c1_60		6	3.29341	0.606161	c1_60	c1_60	c1_2	c1_1	YES			YES								YES																					YES
DPYSL2	c1_2	c1_5	c1_14	c1_38	c1_67	c1_1	c1_2	c1_5	20	10.4669	0.190981	c1_67	c1_14	c1_2	c1_1	YES			YES									YES
LOC110479251	c1_3	c1_6	c1_15	c1_40		6	2.82447	0.504031	c1_40	c1_40	c1_40	c1_1		YES			YES									YES
EIF5B	c1_2	c1_5	c1_14	c1_38	c1_67		11	6.07693	0.352302	c1_67	c1_14	c1_2	c1_1	YES			YES									YES																							YES
LOC110468166	c1_2	c1_5	c1_14	c1_38	c1_67		10	5.09216	0.374484	c1_67	c1_14	c1_2	c1_1	YES			YES									YES																							YES
GOLGA7	c1_2	c1_5	c1_13	c1_34	c1_60		6	2.85248	0.611876	c1_60	c1_60	c1_2	c1_1	YES			YES								YES																					YES
LEPROTL1	c1_2	c1_5	c1_13	c1_34	c1_60		3	1.73957	1	c1_60	c1_60	c1_2	c1_1	YES			YES								YES																					YES
CRIP1	c1_3	c1_6	c1_15	c1_40		3	1.67818	1	c1_40	c1_40	c1_40	c1_1		YES			YES									YES
OSGEP	c1_3	c1_6	c1_15	c1_40		10	5.07041	0.285267	c1_40	c1_40	c1_40	c1_1		YES			YES									YES
LOC110472503	c1_3	c1_8	c1_23		8	3.49605	0.268446	c1_23	c1_8	c1_8	c1_1		YES					YES															YES
GDPD5	c1_2	c1_4	c1_9	c1_28		7	3.58579	0.507239	c1_28	c1_4	c1_2	c1_1	YES		YES					YES																			YES
RBFOX3	c1_3	c1_6	c1_15	c1_46		8	3.71255	0.339571	c1_46	c1_46	c1_46	c1_1		YES			YES									YES
COL4A2	c1_2	c1_5	c1_13	c1_34		4	2.16707	0.849561	NA	NA	c1_2	c1_1	YES			YES								YES																					YES
RDX	c1_2	c1_4	c1_9	c1_27	c1_52		5	2.52574	0.706089	c1_52	c1_4	c1_2	c1_1	YES		YES					YES																		YES
COL6A3	c1_3	c1_6	c1_15	c1_40		4	2.0662	0.696699	c1_40	c1_40	c1_40	c1_1		YES			YES									YES
BHLHE40	c1_2	c1_5	c1_13	c1_34	c1_61		3	1.5261	1	c1_61	c1_61	c1_2	c1_1	YES			YES								YES																					YES
SRPK1	c1_3	c1_7	c1_19	c1_50		4	2.31009	0.836593	c1_50	c1_7	c1_7	c1_1		YES				YES												YES
ZIC2	c1_2	c1_5	c1_13	c1_35	c1_65		5	2.73945	0.709043	c1_65	c1_35	c1_2	c1_1	YES			YES								YES																						YES
PRCC	c1_3	c1_6	c1_15	c1_40		3	1.412	0.331204	c1_40	c1_40	c1_40	c1_1		YES			YES									YES
PIK3R6	c1_3	c1_6	c1_15	c1_46		4	1.89611	0.838357	c1_46	c1_46	c1_46	c1_1		YES			YES									YES
VTN	c1_3	c1_6	c1_15	c1_40	c1_1	c1_3	c1_6	17	8.391	0.191999	c1_40	c1_40	c1_40	c1_1		YES			YES									YES
RGS12	c1_3	c1_8	c1_22		7	3.3238	0.429093	c1_22	c1_8	c1_8	c1_1		YES					YES														YES
PHYHIPL	c1_3	c1_7	c1_19	c1_50	c1_1	c1_3	c1_7	c1_19	c1_50	21	11.4129	0.182582	c1_50	c1_7	c1_7	c1_1		YES				YES												YES
UBL3	c1_2	c1_5	c1_14	c1_38	c1_68	c1_68	12	5.67571	0.268124	c1_68	c1_14	c1_2	c1_1	YES			YES									YES																							YES
TMED4	c1_3	c1_7	c1_20		9	4.59485	0.41324	c1_20	c1_7	c1_7	c1_1		YES				YES													YES
AP4M1	c1_2	c1_5	c1_14	c1_38	c1_67		11	5.04849	0.247536	c1_67	c1_14	c1_2	c1_1	YES			YES									YES																							YES
TMEM218	c1_2	c1_4	c1_10		7	3.10128	0.411147	c1_10	c1_4	c1_2	c1_1	YES		YES						YES
TTLL7	c1_2	c1_5	c1_13	c1_35	c1_65		5	2.39363	0.611114	c1_65	c1_35	c1_2	c1_1	YES			YES								YES																						YES
RANBP1	c1_2	c1_5	c1_13	c1_35	c1_65		4	1.96913	0.693828	c1_65	c1_35	c1_2	c1_1	YES			YES								YES																						YES
LOC110480953	c1_2	c1_4	c1_9	c1_27	c1_56	c1_78		7	3.43239	0.398631	c1_78	c1_4	c1_2	c1_1	YES		YES					YES																		YES
MRPL55	c1_3	c1_6	c1_15	c1_40	c1_1	c1_3	c1_6	c1_15	c1_40	21	12.0807	0.191802	c1_40	c1_40	c1_40	c1_1		YES			YES									YES
DPP10	c1_2	c1_4	c1_9	c1_27	c1_56	c1_78		6	3.04448	0.540362	c1_78	c1_4	c1_2	c1_1	YES		YES					YES																		YES
LOC110476621	c1_2	c1_5	c1_13	c1_34	c1_60		3	1.81713	1	c1_60	c1_60	c1_2	c1_1	YES			YES								YES																					YES
MAGOH	c1_3	c1_6	c1_15	c1_41		6	3.36753	0.621431	c1_41	c1_41	c1_41	c1_1		YES			YES									YES
HCN2	c1_3	c1_6	c1_15	c1_40		4	1.91677	0.51497	c1_40	c1_40	c1_40	c1_1		YES			YES									YES
DNAJB2	c1_3	c1_6	c1_15	c1_40		3	1.64982	1	c1_40	c1_40	c1_40	c1_1		YES			YES									YES
MRPS36	c1_3	c1_6	c1_15		3	1.8652	1	NA	NA	NA	c1_1		YES			YES									YES
BRD3	c1_2	c1_5	c1_13	c1_34	c1_61		7	3.29472	0.442511	c1_61	c1_61	c1_2	c1_1	YES			YES								YES																					YES
SDE2	c1_2	c1_5	c1_14	c1_38	c1_67		3	1.55131	0.691124	c1_67	c1_14	c1_2	c1_1	YES			YES									YES																							YES
SOBP	c1_2	c1_5	c1_13	c1_34	c1_63		6	2.84685	0.485397	c1_63	c1_63	c1_2	c1_1	YES			YES								YES																					YES
MGLL	c1_2	c1_5	c1_14	c1_38	c1_67		6	3.11863	0.549124	c1_67	c1_14	c1_2	c1_1	YES			YES									YES																							YES
LOC110468709	c1_3	c1_7	c1_20		3	1.52742	1	c1_20	c1_7	c1_7	c1_1		YES				YES													YES
LOC110469474	c1_2	c1_5	c1_13	c1_34	c1_60		4	2.18381	0.830772	c1_60	c1_60	c1_2	c1_1	YES			YES								YES																					YES
FRMD8	c1_2	c1_5	c1_13	c1_34	c1_60		4	2.32736	0.831126	c1_60	c1_60	c1_2	c1_1	YES			YES								YES																					YES
WHAMM	c1_2	c1_5	c1_13	c1_34	c1_60		12	6.60188	0.32546	c1_60	c1_60	c1_2	c1_1	YES			YES								YES																					YES
LSG1	c1_2	c1_4	c1_9	c1_27	c1_55		3	1.8827	1	c1_55	c1_4	c1_2	c1_1	YES		YES					YES																		YES
MAN1A2	c1_2	c1_5	c1_13	c1_35	c1_65		6	3.05066	0.479647	c1_65	c1_35	c1_2	c1_1	YES			YES								YES																						YES
CLDN11	c1_2	c1_5	c1_13	c1_34	c1_60		12	5.94605	0.281843	c1_60	c1_60	c1_2	c1_1	YES			YES								YES																					YES
LOC110484123	c1_3	c1_6	c1_15	c1_41		4	2.11028	0.534019	c1_41	c1_41	c1_41	c1_1		YES			YES									YES
SPA17	c1_3	c1_6	c1_15	c1_40		3	1.71662	1	c1_40	c1_40	c1_40	c1_1		YES			YES									YES
MRTFA	c1_3		4	1.87009	0.851517	NA	NA	NA	c1_1		YES
BOLA3	c1_3	c1_6	c1_15	c1_40		3	1.66595	0.362468	c1_40	c1_40	c1_40	c1_1		YES			YES									YES
PPM1B	c1_2	c1_5	c1_13	c1_35	c1_65		5	2.55289	0.721142	c1_65	c1_35	c1_2	c1_1	YES			YES								YES																						YES
TOB2	c1_2	c1_4	c1_9	c1_27	c1_55		3	1.64898	1	c1_55	c1_4	c1_2	c1_1	YES		YES					YES																		YES
AJAP1	c1_3	c1_6	c1_16		9	4.4168	0.414769	c1_16	c1_16	c1_16	c1_1		YES			YES										YES
EIF4G3	c1_2	c1_5	c1_13	c1_35	c1_66		4	1.89715	0.654858	c1_66	c1_35	c1_2	c1_1	YES			YES								YES																						YES
LOC110479618	c1_3	c1_6	c1_15	c1_40		4	2.13262	0.532281	c1_40	c1_40	c1_40	c1_1		YES			YES									YES
ZNRF3	c1_2	c1_5	c1_13	c1_34		4	2.19993	0.831888	NA	NA	c1_2	c1_1	YES			YES								YES																					YES
IFFO1	c1_3	c1_6	c1_15	c1_42	c1_73		6	2.93518	0.546691	c1_73	c1_42	c1_42	c1_1		YES			YES									YES
SYNGR2	c1_2	c1_5	c1_13	c1_37		4	1.82386	0.645335	c1_37	c1_37	c1_2	c1_1	YES			YES								YES																							YES
RPIA	c1_2	c1_5	c1_14	c1_38	c1_67		7	2.92751	0.537438	c1_67	c1_14	c1_2	c1_1	YES			YES									YES																							YES
LOC110483487	c1_3	c1_6	c1_15	c1_40		4	2.43227	0.489971	c1_40	c1_40	c1_40	c1_1		YES			YES									YES
SCARF2	c1_3	c1_6	c1_15	c1_40		5	2.34968	0.722772	c1_40	c1_40	c1_40	c1_1		YES			YES									YES
PPP2R5C	c1_2	c1_5	c1_13	c1_34	c1_60		10	4.56246	0.338501	c1_60	c1_60	c1_2	c1_1	YES			YES								YES																					YES
LOC110483068	c1_3	c1_7	c1_19		4	2.09941	0.686234	NA	c1_7	c1_7	c1_1		YES				YES												YES
DST	c1_3	c1_7	c1_19	c1_50		7	3.35446	0.463712	c1_50	c1_7	c1_7	c1_1		YES				YES												YES
KCTD2	c1_2	c1_5	c1_13	c1_34	c1_60		4	1.96224	0.85394	c1_60	c1_60	c1_2	c1_1	YES			YES								YES																					YES
PPEF1	c1_2	c1_5	c1_14	c1_38	c1_71		3	1.36912	0.711113	c1_71	c1_14	c1_2	c1_1	YES			YES									YES																							YES
BCL11B	c1_2	c1_4	c1_9	c1_27		3	1.52557	1	NA	c1_4	c1_2	c1_1	YES		YES					YES																		YES
MAP4K3	c1_2	c1_5	c1_13	c1_35	c1_65		3	1.48999	1	c1_65	c1_35	c1_2	c1_1	YES			YES								YES																						YES
FBXW4	c1_3	c1_6	c1_17	c1_47	c1_74		7	3.5231	0.378661	c1_74	c1_17	c1_17	c1_1		YES			YES											YES
UNC5B	c1_3	c1_8	c1_22		3	1.53469	0.688637	c1_22	c1_8	c1_8	c1_1		YES					YES														YES
LOC110483164	c1_3	c1_7	c1_19	c1_50		5	2.74192	0.436477	c1_50	c1_7	c1_7	c1_1		YES				YES												YES
NR2C2	c1_3	c1_6	c1_16		10	4.55707	0.292835	c1_16	c1_16	c1_16	c1_1		YES			YES										YES
LOC110479807	c1_3	c1_6	c1_15	c1_40		4	2.0403	0.532506	c1_40	c1_40	c1_40	c1_1		YES			YES									YES
HBS1L	c1_3	c1_7	c1_19	c1_50		5	2.58982	0.624234	c1_50	c1_7	c1_7	c1_1		YES				YES												YES
TAF3	c1_2	c1_4	c1_9	c1_27	c1_55		4	2.18501	0.851774	c1_55	c1_4	c1_2	c1_1	YES		YES					YES																		YES
LOC110483781	c1_3	c1_7	c1_19	c1_50		5	2.54376	0.529118	c1_50	c1_7	c1_7	c1_1		YES				YES												YES
CLGN	c1_2		3	1.33639	1	NA	NA	c1_2	c1_1	YES
VAC14	c1_3	c1_6	c1_15	c1_40		6	3.02515	0.620102	c1_40	c1_40	c1_40	c1_1		YES			YES									YES
ZYG11B	c1_2	c1_4	c1_9	c1_27	c1_55		4	2.00202	0.846956	c1_55	c1_4	c1_2	c1_1	YES		YES					YES																		YES
PTMS	c1_2	c1_4	c1_9	c1_27	c1_53	c1_53	7	3.35456	0.297369	c1_53	c1_4	c1_2	c1_1	YES		YES					YES																		YES
ITPKB	c1_2	c1_4	c1_9	c1_27	c1_55		3	1.63503	1	c1_55	c1_4	c1_2	c1_1	YES		YES					YES																		YES
CUL4B	c1_2	c1_5	c1_13	c1_34	c1_60		4	1.90276	0.689951	c1_60	c1_60	c1_2	c1_1	YES			YES								YES																					YES
NDUFB11	c1_2	c1_4	c1_10		6	2.82254	0.482259	c1_10	c1_4	c1_2	c1_1	YES		YES						YES
IGFBP2	c1_2	c1_5	c1_13	c1_34	c1_60		7	3.26844	0.412921	c1_60	c1_60	c1_2	c1_1	YES			YES								YES																					YES
SLC7A5	c1_2	c1_4	c1_9	c1_27	c1_55		5	2.49994	0.717338	c1_55	c1_4	c1_2	c1_1	YES		YES					YES																		YES
HS6ST3	c1_2	c1_5	c1_13	c1_34	c1_60		5	2.58234	0.711363	c1_60	c1_60	c1_2	c1_1	YES			YES								YES																					YES
CNOT4	c1_2	c1_4	c1_9	c1_27	c1_55		4	2.14102	0.844537	c1_55	c1_4	c1_2	c1_1	YES		YES					YES																		YES
MEMO1	c1_2	c1_4	c1_9	c1_31		6	2.78829	0.47667	c1_31	c1_4	c1_2	c1_1	YES		YES					YES																						YES
LOC110483492	c1_2	c1_4	c1_9	c1_27	c1_55		4	1.98515	0.850115	c1_55	c1_4	c1_2	c1_1	YES		YES					YES																		YES
NRIP2	c1_2	c1_5	c1_13	c1_34	c1_62	c1_81	c1_81	4	2.16592	0.708688	c1_81	c1_62	c1_2	c1_1	YES			YES								YES																					YES
NPLOC4	c1_3	c1_6	c1_15	c1_40		4	2.00634	0.837302	c1_40	c1_40	c1_40	c1_1		YES			YES									YES
NEXMIF	c1_2	c1_4	c1_9	c1_27	c1_55		7	3.50212	0.540857	c1_55	c1_4	c1_2	c1_1	YES		YES					YES																		YES
CARTPT	c1_2	c1_5	c1_14	c1_38	c1_71		4	1.88045	0.151255	c1_71	c1_14	c1_2	c1_1	YES			YES									YES																							YES
ANKS1A	c1_3	c1_6	c1_16		7	3.46904	0.484193	c1_16	c1_16	c1_16	c1_1		YES			YES										YES
NOTCH2	c1_2	c1_5	c1_13	c1_35	c1_65		3	1.67538	1	c1_65	c1_35	c1_2	c1_1	YES			YES								YES																						YES
LOC110482477	c1_3	c1_7	c1_20		13	6.72752	0.303781	c1_20	c1_7	c1_7	c1_1		YES				YES													YES
TNFAIP8L3	c1_3	c1_6	c1_15	c1_40		2	1.06287	0	c1_40	c1_40	c1_40	c1_1		YES			YES									YES
LOC110467598	c1_3	c1_6	c1_17	c1_47		5	2.26115	0.405242	NA	c1_17	c1_17	c1_1		YES			YES											YES
LOC110470319	c1_3	c1_7	c1_19	c1_50		6	3.00673	0.565207	c1_50	c1_7	c1_7	c1_1		YES				YES												YES
S100B	c1_3	c1_6	c1_15	c1_40		6	3.03467	0.4	c1_40	c1_40	c1_40	c1_1		YES			YES									YES
TMOD1	c1_2	c1_5	c1_13	c1_35	c1_65		3	1.53475	1	c1_65	c1_35	c1_2	c1_1	YES			YES								YES																						YES
HSPA5	c1_2	c1_5	c1_14	c1_38	c1_67		9	4.2973	0.337774	c1_67	c1_14	c1_2	c1_1	YES			YES									YES																							YES
CLASP2	c1_2	c1_5	c1_13	c1_34	c1_60		6	2.81548	0.565076	c1_60	c1_60	c1_2	c1_1	YES			YES								YES																					YES
POU3F2	c1_2	c1_4	c1_9	c1_30		4	1.88594	0.840295	c1_30	c1_4	c1_2	c1_1	YES		YES					YES																					YES
SCARB1	c1_2	c1_5	c1_14	c1_38	c1_67		10	4.29814	0.355121	c1_67	c1_14	c1_2	c1_1	YES			YES									YES																							YES
LOC110468531	c1_3	c1_6	c1_15	c1_40		6	3.12533	0.344856	c1_40	c1_40	c1_40	c1_1		YES			YES									YES
SORL1	c1_2	c1_4	c1_9	c1_27	c1_55		5	2.36682	0.630121	c1_55	c1_4	c1_2	c1_1	YES		YES					YES																		YES
SCAMP4	c1_2	c1_5	c1_14	c1_38	c1_67		4	1.84574	0.846643	c1_67	c1_14	c1_2	c1_1	YES			YES									YES																							YES
KCNH5	c1_3	c1_8	c1_22		5	2.5264	0.420708	c1_22	c1_8	c1_8	c1_1		YES					YES														YES
MAP2K3	c1_2	c1_5	c1_13		3	1.54036	1	NA	NA	c1_2	c1_1	YES			YES								YES
LOC110480699	c1_3	c1_6	c1_15	c1_41		8	4.66661	0.455109	c1_41	c1_41	c1_41	c1_1		YES			YES									YES
CARHSP1	c1_2	c1_4	c1_10		4	1.74178	0.359189	c1_10	c1_4	c1_2	c1_1	YES		YES						YES
DBR1	c1_2	c1_5	c1_13	c1_34	c1_62	c1_80		3	1.76584	1	c1_80	c1_62	c1_2	c1_1	YES			YES								YES																					YES
NDE1	c1_2	c1_5	c1_13	c1_34		3	1.56246	1	NA	NA	c1_2	c1_1	YES			YES								YES																					YES
ZRANB1	c1_3	c1_6	c1_15	c1_46		11	4.75755	0.32835	c1_46	c1_46	c1_46	c1_1		YES			YES									YES
C1QB	c1_3	c1_6	c1_15	c1_40		7	3.2302	0.305517	c1_40	c1_40	c1_40	c1_1		YES			YES									YES
SLC35C2	c1_2	c1_4	c1_9	c1_27	c1_55		4	2.29402	0.862672	c1_55	c1_4	c1_2	c1_1	YES		YES					YES																		YES
ATP2B4	c1_2	c1_5	c1_13	c1_34	c1_61		6	2.98507	0.53703	c1_61	c1_61	c1_2	c1_1	YES			YES								YES																					YES
ST8SIA3	c1_3	c1_8	c1_24		5	2.12687	0.507071	c1_24	c1_8	c1_8	c1_1		YES					YES																YES
LOC116184303	c1_3	c1_7	c1_19	c1_50		5	2.34302	0.5	c1_50	c1_7	c1_7	c1_1		YES				YES												YES
STMN4	c1_2	c1_4	c1_9	c1_27	c1_55		3	1.50444	0.313792	c1_55	c1_4	c1_2	c1_1	YES		YES					YES																		YES
STXBP1	c1_2	c1_5	c1_13	c1_35	c1_66		13	5.90549	0.158353	c1_66	c1_35	c1_2	c1_1	YES			YES								YES																						YES
LOC110483174	c1_3	c1_6	c1_15	c1_41		3	1.32791	0.710716	c1_41	c1_41	c1_41	c1_1		YES			YES									YES
MAPKAPK5	c1_2	c1_4	c1_9	c1_28		2	1.01909	0	c1_28	c1_4	c1_2	c1_1	YES		YES					YES																			YES
SST	c1_3	c1_6	c1_17	c1_47	c1_74		7	3.93563	0.546419	c1_74	c1_17	c1_17	c1_1		YES			YES											YES
GPALPP1	c1_3	c1_6	c1_15	c1_42	c1_73		3	1.3979	1	c1_73	c1_42	c1_42	c1_1		YES			YES									YES
RFESD	c1_3	c1_7	c1_20		2	0.911909	1	c1_20	c1_7	c1_7	c1_1		YES				YES													YES
RASD1	c1_3	c1_7	c1_19	c1_50		3	1.6885	1	c1_50	c1_7	c1_7	c1_1		YES				YES												YES
HPCA	c1_3	c1_6	c1_17	c1_47	c1_74		4	1.90283	0.655868	c1_74	c1_17	c1_17	c1_1		YES			YES											YES
KCNC2	c1_3	c1_6	c1_16		6	2.83226	0.402377	c1_16	c1_16	c1_16	c1_1		YES			YES										YES
NCKIPSD	c1_2	c1_4	c1_9	c1_27		4	1.90532	0.494781	NA	c1_4	c1_2	c1_1	YES		YES					YES																		YES
CKS2	c1_3	c1_6	c1_15	c1_40		4	2.08781	0.514172	c1_40	c1_40	c1_40	c1_1		YES			YES									YES
ALDH16A1	c1_3	c1_6	c1_15	c1_40		5	2.44914	0.716102	c1_40	c1_40	c1_40	c1_1		YES			YES									YES
CAMK4	c1_3	c1_7	c1_20		5	2.30804	0.422666	c1_20	c1_7	c1_7	c1_1		YES				YES													YES
IRF2BP2	c1_2	c1_5	c1_13	c1_34	c1_60		7	3.47189	0.405666	c1_60	c1_60	c1_2	c1_1	YES			YES								YES																					YES
STX6	c1_3	c1_6	c1_15	c1_40		4	1.90715	0.157884	c1_40	c1_40	c1_40	c1_1		YES			YES									YES
DHCR24	c1_3	c1_6	c1_15	c1_46		5	2.15848	0.58313	c1_46	c1_46	c1_46	c1_1		YES			YES									YES
PPRC1	c1_2	c1_4	c1_10		8	3.39866	0.326188	c1_10	c1_4	c1_2	c1_1	YES		YES						YES
SURF2	c1_3	c1_6	c1_15	c1_40		3	1.56084	1	c1_40	c1_40	c1_40	c1_1		YES			YES									YES
ARPC5	c1_3	c1_6	c1_15	c1_40		9	4.59203	0.388703	c1_40	c1_40	c1_40	c1_1		YES			YES									YES
CAMKMT	c1_2	c1_5	c1_13	c1_34	c1_60		4	1.9049	0.51995	c1_60	c1_60	c1_2	c1_1	YES			YES								YES																					YES
LOC110469168	c1_2	c1_5	c1_13		13	6.08724	0.286205	NA	NA	c1_2	c1_1	YES			YES								YES
ADAMTS1	c1_2	c1_5	c1_13	c1_34		4	1.9863	0.850063	NA	NA	c1_2	c1_1	YES			YES								YES																					YES
IAPP	c1_3	c1_8	c1_22		6	3.09665	0.518871	c1_22	c1_8	c1_8	c1_1		YES					YES														YES
ZNF462	c1_2	c1_5	c1_13	c1_35	c1_65		6	2.911	0.613389	c1_65	c1_35	c1_2	c1_1	YES			YES								YES																						YES
VEGFA	c1_2	c1_5	c1_13	c1_34	c1_60		4	2.19643	0.858983	c1_60	c1_60	c1_2	c1_1	YES			YES								YES																					YES
GHR	c1_2	c1_5	c1_13		3	1.30626	0	NA	NA	c1_2	c1_1	YES			YES								YES
WDR83OS	c1_3	c1_6	c1_15	c1_40		7	3.36435	0.394483	c1_40	c1_40	c1_40	c1_1		YES			YES									YES
CCND1	c1_2	c1_5	c1_13	c1_35	c1_65		5	2.57628	0.705689	c1_65	c1_35	c1_2	c1_1	YES			YES								YES																						YES
PTGES3	c1_2	c1_5	c1_14	c1_38	c1_67		7	3.58117	0.34062	c1_67	c1_14	c1_2	c1_1	YES			YES									YES																							YES
LARP4	c1_3	c1_6	c1_16		3	1.49822	0.665862	c1_16	c1_16	c1_16	c1_1		YES			YES										YES
LRRC57	c1_2	c1_4	c1_9	c1_27	c1_52		3	1.56198	1	c1_52	c1_4	c1_2	c1_1	YES		YES					YES																		YES
LRP1	c1_3	c1_7	c1_19	c1_50		2	0.934615	0	c1_50	c1_7	c1_7	c1_1		YES				YES												YES
RPGRIP1L	c1_3	c1_7	c1_19	c1_50		10	4.63378	0.331625	c1_50	c1_7	c1_7	c1_1		YES				YES												YES
CWC27	c1_3	c1_7	c1_19	c1_50		3	1.33457	1	c1_50	c1_7	c1_7	c1_1		YES				YES												YES
MTPN	c1_2	c1_5	c1_14	c1_38	c1_67		13	6.16313	0.250942	c1_67	c1_14	c1_2	c1_1	YES			YES									YES																							YES
MSL1	c1_3	c1_6	c1_16		7	3.25238	0.49322	c1_16	c1_16	c1_16	c1_1		YES			YES										YES
FGF10	c1_2	c1_5	c1_13	c1_35	c1_65		6	2.89733	0.463908	c1_65	c1_35	c1_2	c1_1	YES			YES								YES																						YES
ACOX1	c1_2	c1_5	c1_13	c1_35	c1_65		3	1.52638	1	c1_65	c1_35	c1_2	c1_1	YES			YES								YES																						YES
PACSIN1	c1_3	c1_6	c1_15	c1_40		6	2.78283	0.480583	c1_40	c1_40	c1_40	c1_1		YES			YES									YES
RASSF8	c1_2	c1_5	c1_14	c1_38	c1_67		7	2.9789	0.444509	c1_67	c1_14	c1_2	c1_1	YES			YES									YES																							YES
SLC29A1	c1_2	c1_4	c1_9		3	1.47982	1	NA	c1_4	c1_2	c1_1	YES		YES					YES
NECAP1	c1_2	c1_4	c1_9	c1_27	c1_55		6	2.76284	0.270746	c1_55	c1_4	c1_2	c1_1	YES		YES					YES																		YES
GOLT1B	c1_3	c1_6	c1_15	c1_40		3	1.26686	1	c1_40	c1_40	c1_40	c1_1		YES			YES									YES
ZFAND6	c1_2	c1_4	c1_9	c1_27	c1_55		9	4.15932	0.392483	c1_55	c1_4	c1_2	c1_1	YES		YES					YES																		YES
SEC22A	c1_2	c1_5	c1_13	c1_34	c1_60		7	3.21655	0.493239	c1_60	c1_60	c1_2	c1_1	YES			YES								YES																					YES
PEX13	c1_3	c1_6	c1_16		5	2.35201	0.518764	c1_16	c1_16	c1_16	c1_1		YES			YES										YES
USP53	c1_2	c1_5	c1_13	c1_34	c1_60		5	2.58519	0.691731	c1_60	c1_60	c1_2	c1_1	YES			YES								YES																					YES
TMED7	c1_3	c1_6	c1_15	c1_40		2	1.03302	1	c1_40	c1_40	c1_40	c1_1		YES			YES									YES
SRPRA	c1_3	c1_6	c1_16		6	2.82986	0.458332	c1_16	c1_16	c1_16	c1_1		YES			YES										YES
TMEM131	c1_3	c1_7	c1_19	c1_50		7	3.15342	0.391553	c1_50	c1_7	c1_7	c1_1		YES				YES												YES
MTERF2	c1_2	c1_5	c1_13		6	2.59774	0.4	NA	NA	c1_2	c1_1	YES			YES								YES
CCDC59	c1_2	c1_5	c1_14	c1_38	c1_67		3	1.3925	1	c1_67	c1_14	c1_2	c1_1	YES			YES									YES																							YES
TOB1	c1_2	c1_5	c1_13	c1_35	c1_65		2	1.12179	1	c1_65	c1_35	c1_2	c1_1	YES			YES								YES																						YES
POMT1	c1_3	c1_6	c1_17	c1_47		1	0.543251	NaN	NA	c1_17	c1_17	c1_1		YES			YES											YES
CNTNAP1	c1_3	c1_6	c1_15	c1_46		10	4.79143	0.351527	c1_46	c1_46	c1_46	c1_1		YES			YES									YES
UPF1	c1_2	c1_5	c1_14	c1_38	c1_67		4	1.76979	0.495248	c1_67	c1_14	c1_2	c1_1	YES			YES									YES																							YES
PNRC1	c1_2	c1_5	c1_14	c1_38	c1_67		3	1.49912	0.641616	c1_67	c1_14	c1_2	c1_1	YES			YES									YES																							YES
LOC116183127	c1_3	c1_6	c1_15	c1_40		4	1.72826	0.358237	c1_40	c1_40	c1_40	c1_1		YES			YES									YES
GTDC1	c1_2	c1_5	c1_13		5	2.13528	0.503641	NA	NA	c1_2	c1_1	YES			YES								YES
ZNF618	c1_2	c1_5	c1_14	c1_38	c1_69		10	4.38563	0.279025	c1_69	c1_14	c1_2	c1_1	YES			YES									YES																							YES
TMBIM1	c1_3	c1_6	c1_15		2	0.952784	0	NA	NA	NA	c1_1		YES			YES									YES
TMF1	c1_2	c1_5	c1_13	c1_34		3	1.38438	1	NA	NA	c1_2	c1_1	YES			YES								YES																					YES
AMD1	c1_2	c1_5	c1_13	c1_34	c1_60		5	2.56371	0.719414	c1_60	c1_60	c1_2	c1_1	YES			YES								YES																					YES
CTDSPL	c1_2	c1_5	c1_13	c1_34	c1_60		8	4.68101	0.450856	c1_60	c1_60	c1_2	c1_1	YES			YES								YES																					YES
TCTE3	c1_3	c1_6	c1_15	c1_40		5	2.40867	0.697527	c1_40	c1_40	c1_40	c1_1		YES			YES									YES
OLFML2A	c1_3	c1_6	c1_15	c1_40		4	1.92282	0.663591	c1_40	c1_40	c1_40	c1_1		YES			YES									YES
CLSTN3	c1_3	c1_6	c1_15	c1_40		4	2.00964	0.334468	c1_40	c1_40	c1_40	c1_1		YES			YES									YES
OGA	c1_2	c1_4	c1_9	c1_27	c1_56	c1_78		3	1.41914	1	c1_78	c1_4	c1_2	c1_1	YES		YES					YES																		YES
KIAA0319L	c1_2	c1_4	c1_9	c1_27	c1_54		5	2.39098	0.619875	c1_54	c1_4	c1_2	c1_1	YES		YES					YES																		YES
LOC110475926	c1_3	c1_6	c1_15	c1_41		7	3.53152	0.548581	c1_41	c1_41	c1_41	c1_1		YES			YES									YES
YBX1	c1_2	c1_5	c1_14	c1_38	c1_67		10	4.3122	0.268141	c1_67	c1_14	c1_2	c1_1	YES			YES									YES																							YES
PHYHIP	c1_3	c1_7	c1_19	c1_50		3	1.45816	1	c1_50	c1_7	c1_7	c1_1		YES				YES												YES
RP2	c1_2	c1_4	c1_9	c1_27	c1_55		3	1.42838	1	c1_55	c1_4	c1_2	c1_1	YES		YES					YES																		YES
PRRC2B	c1_3	c1_6	c1_15	c1_40		4	1.81416	0.173247	c1_40	c1_40	c1_40	c1_1		YES			YES									YES
MKNK1	c1_3	c1_6	c1_15	c1_40		3	1.63811	1	c1_40	c1_40	c1_40	c1_1		YES			YES									YES
FXYD2	c1_3	c1_6	c1_15	c1_40		7	3.0608	0.235833	c1_40	c1_40	c1_40	c1_1		YES			YES									YES
SYF2	c1_3	c1_6	c1_15	c1_40		3	1.38212	1	c1_40	c1_40	c1_40	c1_1		YES			YES									YES
DUSP23	c1_3	c1_6	c1_15	c1_40		3	1.51759	1	c1_40	c1_40	c1_40	c1_1		YES			YES									YES
NELL2	c1_2	c1_5	c1_14	c1_38	c1_67		6	2.73249	0.456462	c1_67	c1_14	c1_2	c1_1	YES			YES									YES																							YES
CCDC186	c1_3	c1_6	c1_15	c1_40		5	2.39559	0.509121	c1_40	c1_40	c1_40	c1_1		YES			YES									YES
PFKFB3	c1_2	c1_5	c1_13	c1_34	c1_61		3	1.36824	0.660283	c1_61	c1_61	c1_2	c1_1	YES			YES								YES																					YES
MPHOSPH6	c1_3	c1_7	c1_19	c1_50		8	3.48804	0.329009	c1_50	c1_7	c1_7	c1_1		YES				YES												YES
LOC110475973	c1_3	c1_6	c1_15	c1_46		9	3.81351	0.349881	c1_46	c1_46	c1_46	c1_1		YES			YES									YES
LOC116184803	c1_3	c1_8	c1_24	c1_24	6	2.46462	0.482538	c1_24	c1_8	c1_8	c1_1		YES					YES																YES
PELO	c1_2	c1_5	c1_13	c1_35	c1_65		3	1.54188	1	c1_65	c1_35	c1_2	c1_1	YES			YES								YES																						YES
GPR158	c1_3	c1_6	c1_15	c1_41		5	2.14187	0.498855	c1_41	c1_41	c1_41	c1_1		YES			YES									YES
LYPLA2	c1_2	c1_4	c1_9	c1_27	c1_55		4	1.82652	0.863114	c1_55	c1_4	c1_2	c1_1	YES		YES					YES																		YES
ILF3	c1_3	c1_6	c1_16	c1_1	c1_3	c1_6	c1_16	21	10.1396	0.162083	c1_16	c1_16	c1_16	c1_1		YES			YES										YES
PMM2	c1_3	c1_6	c1_17	c1_49		7	3.03447	0.250296	c1_49	c1_17	c1_17	c1_1		YES			YES											YES
RGS8	c1_3	c1_6	c1_16		7	3.07535	0.349593	c1_16	c1_16	c1_16	c1_1		YES			YES										YES
NRN1	c1_2	c1_5	c1_13	c1_34	c1_62	c1_80		3	1.64432	1	c1_80	c1_62	c1_2	c1_1	YES			YES								YES																					YES
NCKAP1	c1_2	c1_5	c1_13	c1_34	c1_60		3	1.40668	1	c1_60	c1_60	c1_2	c1_1	YES			YES								YES																					YES
RGCC	c1_2	c1_4	c1_11		4	1.74719	0.333333	c1_11	c1_4	c1_2	c1_1	YES		YES							YES
LOC110476643	c1_3	c1_7	c1_19	c1_50		9	4.54838	0.426959	c1_50	c1_7	c1_7	c1_1		YES				YES												YES
FNBP1L	c1_2	c1_5	c1_13	c1_35	c1_65		3	1.44819	1	c1_65	c1_35	c1_2	c1_1	YES			YES								YES																						YES
ACADM	c1_3	c1_7	c1_19	c1_50		4	1.97738	0.531763	c1_50	c1_7	c1_7	c1_1		YES				YES												YES
FBXO34	c1_3	c1_7	c1_20	c1_1	c1_3	c1_7	21	10.98	0.178573	c1_20	c1_7	c1_7	c1_1		YES				YES													YES
LOC110482231	c1_3	c1_6	c1_15	c1_40		5	2.49227	0.70359	c1_40	c1_40	c1_40	c1_1		YES			YES									YES
ADCYAP1	c1_2	c1_5	c1_14	c1_38	c1_67		6	3.21741	0.622143	c1_67	c1_14	c1_2	c1_1	YES			YES									YES																							YES
TOMM34	c1_2	c1_4	c1_9	c1_27		4	2.28429	0.841282	NA	c1_4	c1_2	c1_1	YES		YES					YES																		YES
TRRAP	c1_2	c1_5	c1_13		10	4.19543	0.339513	NA	NA	c1_2	c1_1	YES			YES								YES
PGBD5	c1_2	c1_4	c1_9	c1_28		4	2.00254	0.858067	c1_28	c1_4	c1_2	c1_1	YES		YES					YES																			YES
SNRNP35	c1_3	c1_8	c1_24		3	1.32677	1	c1_24	c1_8	c1_8	c1_1		YES					YES																YES
SLC25A11	c1_3	c1_6	c1_15	c1_40		8	3.92759	0.339919	c1_40	c1_40	c1_40	c1_1		YES			YES									YES
ARRDC4	c1_2	c1_4	c1_9	c1_27	c1_55		3	1.46	1	c1_55	c1_4	c1_2	c1_1	YES		YES					YES																		YES
LOC110482111			1	0.532631	NaN	NA	NA	NA	c1_1
LRFN2	c1_3	c1_8	c1_23		4	1.7321	0.528278	c1_23	c1_8	c1_8	c1_1		YES					YES															YES
PLCD4	c1_3	c1_6	c1_15	c1_40		7	3.07362	0.294794	c1_40	c1_40	c1_40	c1_1		YES			YES									YES
SNRNP27	c1_2	c1_4	c1_10		12	5.36801	0.212485	c1_10	c1_4	c1_2	c1_1	YES		YES						YES
ST3GAL2	c1_2	c1_5	c1_13	c1_34	c1_60		5	2.96286	0.699716	c1_60	c1_60	c1_2	c1_1	YES			YES								YES																					YES
SIK1	c1_3	c1_6	c1_17	c1_47	c1_74		5	2.29842	0.427283	c1_74	c1_17	c1_17	c1_1		YES			YES											YES
SGCG	c1_2	c1_5	c1_13	c1_35	c1_65		3	1.57275	1	c1_65	c1_35	c1_2	c1_1	YES			YES								YES																						YES
SART3	c1_2	c1_5	c1_13	c1_34	c1_62	c1_80		4	1.6833	0.693058	c1_80	c1_62	c1_2	c1_1	YES			YES								YES																					YES
RAP1GDS1	c1_3	c1_6	c1_17	c1_49		11	5.1444	0.22494	c1_49	c1_17	c1_17	c1_1		YES			YES											YES
TMEM121	c1_2	c1_5	c1_13		5	2.34402	0.40681	NA	NA	c1_2	c1_1	YES			YES								YES
CACNB3	c1_3	c1_6	c1_15	c1_40		3	1.68443	1	c1_40	c1_40	c1_40	c1_1		YES			YES									YES
DLGAP3	c1_2	c1_5	c1_13		3	1.27583	0	NA	NA	c1_2	c1_1	YES			YES								YES
MAPK11	c1_2	c1_5	c1_13	c1_34	c1_60		4	1.94077	0.52736	c1_60	c1_60	c1_2	c1_1	YES			YES								YES																					YES
GCLM	c1_2	c1_5	c1_13	c1_34	c1_60		3	1.82356	1	c1_60	c1_60	c1_2	c1_1	YES			YES								YES																					YES
DNAJC21	c1_3	c1_7	c1_19	c1_50		3	1.29511	1	c1_50	c1_7	c1_7	c1_1		YES				YES												YES
UBQLN1	c1_2	c1_5	c1_13	c1_35	c1_65		6	2.65584	0.341089	c1_65	c1_35	c1_2	c1_1	YES			YES								YES																						YES
PAN3	c1_3	c1_6	c1_15	c1_40		4	1.65203	0.333333	c1_40	c1_40	c1_40	c1_1		YES			YES									YES
DCTN1	c1_3	c1_6	c1_15	c1_40		4	1.98526	0.849017	c1_40	c1_40	c1_40	c1_1		YES			YES									YES
HMGA1	c1_2	c1_5	c1_13	c1_34	c1_60		3	1.42983	1	c1_60	c1_60	c1_2	c1_1	YES			YES								YES																					YES
BCL6	c1_2	c1_5	c1_13	c1_34	c1_60		3	1.32091	1	c1_60	c1_60	c1_2	c1_1	YES			YES								YES																					YES
ONECUT1	c1_3	c1_8	c1_22		12	5.53719	0.230756	c1_22	c1_8	c1_8	c1_1		YES					YES														YES
USP22	c1_2	c1_5	c1_13	c1_35	c1_65		4	1.81388	0.657087	c1_65	c1_35	c1_2	c1_1	YES			YES								YES																						YES
PDE10A	c1_2	c1_5	c1_14	c1_38	c1_67		7	3.17699	0.281219	c1_67	c1_14	c1_2	c1_1	YES			YES									YES																							YES
CHAC1	c1_2	c1_5	c1_13	c1_34	c1_60		5	2.34864	0.621414	c1_60	c1_60	c1_2	c1_1	YES			YES								YES																					YES
C1QTNF4	c1_3	c1_7	c1_19	c1_50		4	2.05831	0.685417	c1_50	c1_7	c1_7	c1_1		YES				YES												YES
NOTCH1	c1_2	c1_4	c1_9	c1_28		3	1.47235	1	c1_28	c1_4	c1_2	c1_1	YES		YES					YES																			YES
DDOST	c1_3	c1_6	c1_15	c1_44		5	2.36878	0.514683	c1_44	c1_44	c1_44	c1_1		YES			YES									YES
HIGD1A	c1_3	c1_6	c1_15	c1_40		9	4.79483	0.367855	c1_40	c1_40	c1_40	c1_1		YES			YES									YES
LOC110482499	c1_3	c1_6	c1_17	c1_47	c1_76		2	0.848067	1	c1_76	c1_17	c1_17	c1_1		YES			YES											YES
USP15	c1_3	c1_6	c1_16		5	2.11281	0.510905	c1_16	c1_16	c1_16	c1_1		YES			YES										YES
NRCAM	c1_2	c1_4	c1_9	c1_28		6	2.86738	0.347756	c1_28	c1_4	c1_2	c1_1	YES		YES					YES																			YES
PFKFB2	c1_3	c1_6	c1_15	c1_40		2	0.99988	0	c1_40	c1_40	c1_40	c1_1		YES			YES									YES
ZBTB16	c1_2	c1_5	c1_13	c1_34	c1_63		3	1.28881	0.702934	c1_63	c1_63	c1_2	c1_1	YES			YES								YES																					YES
ATG14	c1_2	c1_5	c1_14	c1_38	c1_67		10	4.79964	0.346753	c1_67	c1_14	c1_2	c1_1	YES			YES									YES																							YES
RMND5A	c1_3	c1_6	c1_15	c1_42	c1_73		4	1.89814	0.182324	c1_73	c1_42	c1_42	c1_1		YES			YES									YES
LOC110474493	c1_3	c1_8	c1_26		7	2.89302	0.341683	c1_26	c1_8	c1_8	c1_1		YES					YES																		YES
BEND6	c1_3	c1_7	c1_19	c1_50		5	2.36006	0.403607	c1_50	c1_7	c1_7	c1_1		YES				YES												YES
SHC4	c1_3	c1_7	c1_19	c1_50		1	0.522696	NaN	c1_50	c1_7	c1_7	c1_1		YES				YES												YES
CZH18orf25	c1_2	c1_5	c1_13	c1_35	c1_65		3	1.36539	1	c1_65	c1_35	c1_2	c1_1	YES			YES								YES																						YES
LOC110476296	c1_3	c1_6	c1_15	c1_40		1	0.522358	NaN	c1_40	c1_40	c1_40	c1_1		YES			YES									YES
FAM184B	c1_3	c1_6	c1_15	c1_40		5	2.18217	0.50342	c1_40	c1_40	c1_40	c1_1		YES			YES									YES
SOX6	c1_2	c1_4	c1_9	c1_27	c1_55		3	1.5504	1	c1_55	c1_4	c1_2	c1_1	YES		YES					YES																		YES
LOC110475656	c1_2	c1_5	c1_14	c1_39		4	1.84428	0.527825	c1_39	c1_14	c1_2	c1_1	YES			YES									YES																								YES
LOC110468582	c1_2	c1_5	c1_14	c1_38		3	1.46868	1	NA	c1_14	c1_2	c1_1	YES			YES									YES																							YES
CADM1	c1_2	c1_4	c1_9	c1_32		6	2.57438	0.41993	c1_32	c1_4	c1_2	c1_1	YES		YES					YES																							YES
MDM4	c1_2	c1_5	c1_13	c1_35	c1_65		2	0.950105	1	c1_65	c1_35	c1_2	c1_1	YES			YES								YES																						YES
SRRM1	c1_3	c1_7	c1_19	c1_50		5	2.16854	0.308593	c1_50	c1_7	c1_7	c1_1		YES				YES												YES
LRRIQ1	c1_2	c1_5	c1_13		3	1.38111	0.667764	NA	NA	c1_2	c1_1	YES			YES								YES
HDX	c1_2	c1_5	c1_13	c1_34	c1_63		4	1.85128	0.482777	c1_63	c1_63	c1_2	c1_1	YES			YES								YES																					YES
PRNP	c1_2	c1_5	c1_13	c1_35	c1_65		6	2.72483	0.324632	c1_65	c1_35	c1_2	c1_1	YES			YES								YES																						YES
LOC110469472	c1_3	c1_6	c1_17	c1_47	c1_75		3	1.28498	1	c1_75	c1_17	c1_17	c1_1		YES			YES											YES
LOC110476792	c1_3	c1_6	c1_15	c1_40		6	2.69542	0.326092	c1_40	c1_40	c1_40	c1_1		YES			YES									YES
TNS1	c1_3	c1_6	c1_15	c1_45		1	0.519619	NaN	c1_45	c1_45	c1_45	c1_1		YES			YES									YES
STARD4	c1_2	c1_5	c1_14	c1_38	c1_67		3	1.46227	0.65606	c1_67	c1_14	c1_2	c1_1	YES			YES									YES																							YES
NT5M	c1_3	c1_7	c1_19	c1_50		1	0.51891	NaN	c1_50	c1_7	c1_7	c1_1		YES				YES												YES
MFAP4	c1_3	c1_6	c1_15	c1_40		5	2.26699	0.295625	c1_40	c1_40	c1_40	c1_1		YES			YES									YES
COMMD8	c1_3	c1_6	c1_15	c1_40		5	2.20862	0.308716	c1_40	c1_40	c1_40	c1_1		YES			YES									YES
ANXA4	c1_3	c1_6	c1_17	c1_49		3	1.40822	1	c1_49	c1_17	c1_17	c1_1		YES			YES											YES
PNKD	c1_3	c1_6	c1_15	c1_40		4	1.72435	0.509095	c1_40	c1_40	c1_40	c1_1		YES			YES									YES
DSCAM	c1_3	c1_7	c1_19	c1_50		6	2.6341	0.417339	c1_50	c1_7	c1_7	c1_1		YES				YES												YES
SPRYD3	c1_2	c1_4	c1_9	c1_33		2	0.929388	1	c1_33	c1_4	c1_2	c1_1	YES		YES					YES																								YES
LIPG	c1_2	c1_5	c1_14	c1_38	c1_67		6	2.55983	0.544429	c1_67	c1_14	c1_2	c1_1	YES			YES									YES																							YES
LOC110476058	c1_3	c1_6	c1_15	c1_40		3	1.22397	0.636111	c1_40	c1_40	c1_40	c1_1		YES			YES									YES
KRTCAP3	c1_3	c1_6	c1_15	c1_41		7	2.953	0.141851	c1_41	c1_41	c1_41	c1_1		YES			YES									YES
MAFK	c1_3	c1_6	c1_15	c1_46		3	1.3677	1	c1_46	c1_46	c1_46	c1_1		YES			YES									YES
HSPH1	c1_3	c1_6	c1_15	c1_42	c1_73		4	1.58339	0.183728	c1_73	c1_42	c1_42	c1_1		YES			YES									YES
RXRB	c1_3	c1_7	c1_19	c1_50		3	1.30801	0.697605	c1_50	c1_7	c1_7	c1_1		YES				YES												YES
FAM171A2	c1_3	c1_6	c1_15	c1_40		6	2.71906	0.343237	c1_40	c1_40	c1_40	c1_1		YES			YES									YES
CRTAC1	c1_3	c1_6	c1_15	c1_40		5	2.10198	0.522276	c1_40	c1_40	c1_40	c1_1		YES			YES									YES
AKAP9	c1_3	c1_6	c1_15	c1_40		7	3.22154	0.352004	c1_40	c1_40	c1_40	c1_1		YES			YES									YES
HHLA2	c1_2	c1_5	c1_13	c1_34	c1_60		3	1.22314	1	c1_60	c1_60	c1_2	c1_1	YES			YES								YES																					YES
FN1	c1_2	c1_5	c1_14	c1_38	c1_67		10	4.3244	0.3304	c1_67	c1_14	c1_2	c1_1	YES			YES									YES																							YES
CAMK2B	c1_2	c1_5	c1_14	c1_38	c1_67		3	1.48089	1	c1_67	c1_14	c1_2	c1_1	YES			YES									YES																							YES
LOC110483430	c1_3	c1_7	c1_19	c1_50		5	2.42663	0.622012	c1_50	c1_7	c1_7	c1_1		YES				YES												YES
RAPGEF1	c1_3	c1_6	c1_16		7	3.24087	0.193283	c1_16	c1_16	c1_16	c1_1		YES			YES										YES
R3HDM2	c1_3	c1_6	c1_17	c1_48		5	2.29368	0.29942	c1_48	c1_17	c1_17	c1_1		YES			YES											YES
HMOX2	c1_3	c1_6	c1_15	c1_42	c1_73		6	2.72967	0.324351	c1_73	c1_42	c1_42	c1_1		YES			YES									YES
RASSF5	c1_2	c1_5	c1_13	c1_35	c1_65		2	1.00851	0	c1_65	c1_35	c1_2	c1_1	YES			YES								YES																						YES
LOC110474874	c1_3	c1_8		2	0.935719	1	NA	c1_8	c1_8	c1_1		YES					YES
NDUFAF2	c1_2	c1_5	c1_14	c1_38	c1_67		2	0.867611	1	c1_67	c1_14	c1_2	c1_1	YES			YES									YES																							YES
PI4KB	c1_3	c1_6	c1_15	c1_40		3	1.31296	1	c1_40	c1_40	c1_40	c1_1		YES			YES									YES
RCOR3	c1_2	c1_4	c1_9	c1_27	c1_55		3	1.29678	1	c1_55	c1_4	c1_2	c1_1	YES		YES					YES																		YES
FCHSD2	c1_2	c1_5	c1_13	c1_35	c1_65		6	2.55929	0.275717	c1_65	c1_35	c1_2	c1_1	YES			YES								YES																						YES
FKBP8	c1_3	c1_6	c1_16		7	3.13927	0.19755	c1_16	c1_16	c1_16	c1_1		YES			YES										YES
SMU1	c1_2	c1_5	c1_13	c1_34	c1_60		4	1.81709	0.836013	c1_60	c1_60	c1_2	c1_1	YES			YES								YES																					YES
SORBS1	c1_3	c1_7	c1_19	c1_51		3	1.27493	0.341893	c1_51	c1_7	c1_7	c1_1		YES				YES												YES
MERTK	c1_3	c1_6	c1_17	c1_49		4	1.78685	0.835513	c1_49	c1_17	c1_17	c1_1		YES			YES											YES
DQX1	c1_3	c1_6	c1_15	c1_40		5	2.10175	0.42865	c1_40	c1_40	c1_40	c1_1		YES			YES									YES
TCHP	c1_3	c1_6	c1_15	c1_40		2	0.904824	1	c1_40	c1_40	c1_40	c1_1		YES			YES									YES
LOC110483343	c1_3	c1_6	c1_15	c1_46		4	1.72978	0.495445	c1_46	c1_46	c1_46	c1_1		YES			YES									YES
IPO9	c1_2	c1_5	c1_14	c1_38	c1_67		4	1.67531	0.489305	c1_67	c1_14	c1_2	c1_1	YES			YES									YES																							YES
NSMF	c1_3	c1_7	c1_20		4	1.8348	0.666667	c1_20	c1_7	c1_7	c1_1		YES				YES													YES
B3GALT1	c1_2	c1_5	c1_13	c1_34	c1_62	c1_81		2	0.852313	1	c1_81	c1_62	c1_2	c1_1	YES			YES								YES																					YES
MICU1	c1_3	c1_6	c1_15	c1_40		9	4.05506	0.286322	c1_40	c1_40	c1_40	c1_1		YES			YES									YES
EPHB1	c1_2	c1_5	c1_13	c1_34	c1_60		2	0.845441	1	c1_60	c1_60	c1_2	c1_1	YES			YES								YES																					YES
PPP6R2	c1_2		1	0.51143	NaN	NA	NA	c1_2	c1_1	YES
DAGLB	c1_2	c1_4	c1_10		5	2.13672	0.50996	c1_10	c1_4	c1_2	c1_1	YES		YES						YES
NANOS1	c1_2	c1_4		4	1.65657	0	NA	c1_4	c1_2	c1_1	YES		YES
CUX1	c1_2	c1_5	c1_13	c1_34	c1_60		4	1.8339	0.843073	c1_60	c1_60	c1_2	c1_1	YES			YES								YES																					YES
ADRA2C	c1_3	c1_8	c1_22		4	1.6798	0.836609	c1_22	c1_8	c1_8	c1_1		YES					YES														YES
TSC22D3	c1_3	c1_6	c1_15	c1_40		3	1.4158	0.680313	c1_40	c1_40	c1_40	c1_1		YES			YES									YES
PIM3	c1_2	c1_5	c1_14	c1_38	c1_67		4	1.9257	0.841826	c1_67	c1_14	c1_2	c1_1	YES			YES									YES																							YES
ABCF1	c1_2	c1_4	c1_9	c1_33		6	2.75643	0.199048	c1_33	c1_4	c1_2	c1_1	YES		YES					YES																								YES
FMOD	c1_2	c1_5	c1_13	c1_35	c1_65		3	1.21974	1	c1_65	c1_35	c1_2	c1_1	YES			YES								YES																						YES
LOC110475846	c1_3	c1_6	c1_15	c1_40		2	0.936064	0	c1_40	c1_40	c1_40	c1_1		YES			YES									YES
RPL7L1	c1_2	c1_5	c1_13	c1_34	c1_60		3	1.44461	1	c1_60	c1_60	c1_2	c1_1	YES			YES								YES																					YES
LOC110475293	c1_2	c1_5	c1_13	c1_37		3	1.23662	1	c1_37	c1_37	c1_2	c1_1	YES			YES								YES																							YES
XRCC5	c1_3	c1_7	c1_19	c1_50		6	2.79583	0.531855	c1_50	c1_7	c1_7	c1_1		YES				YES												YES
TMEM14A	c1_3	c1_6	c1_15	c1_41		3	1.4413	0	c1_41	c1_41	c1_41	c1_1		YES			YES									YES
MAP7D3	c1_3	c1_7	c1_20		5	2.28947	0.505583	c1_20	c1_7	c1_7	c1_1		YES				YES													YES
COPZ1	c1_3	c1_6	c1_15	c1_43		8	3.38713	0.352853	c1_43	c1_43	c1_43	c1_1		YES			YES									YES
CETN2	c1_3	c1_6	c1_17	c1_47	c1_74		5	2.36332	0.499152	c1_74	c1_17	c1_17	c1_1		YES			YES											YES
GRHPR	c1_3	c1_6	c1_16		3	1.36588	0.685902	c1_16	c1_16	c1_16	c1_1		YES			YES										YES
EMCN	c1_3	c1_7	c1_20		4	1.78477	0.666667	c1_20	c1_7	c1_7	c1_1		YES				YES													YES
KIF21B	c1_2	c1_5	c1_14	c1_38	c1_67		2	0.905888	0	c1_67	c1_14	c1_2	c1_1	YES			YES									YES																							YES
SIK2	c1_3	c1_6	c1_15		4	1.82952	0.68314	NA	NA	NA	c1_1		YES			YES									YES
LMAN2L	c1_3	c1_6	c1_15	c1_40		3	1.38833	1	c1_40	c1_40	c1_40	c1_1		YES			YES									YES
ZMAT4	c1_2	c1_4	c1_10		12	5.10284	0.2015	c1_10	c1_4	c1_2	c1_1	YES		YES						YES
SCN2B	c1_3	c1_6	c1_15	c1_40		7	3.40835	0.353062	c1_40	c1_40	c1_40	c1_1		YES			YES									YES
BHLHE23	c1_2	c1_5	c1_13	c1_35	c1_65		4	1.75063	0.505825	c1_65	c1_35	c1_2	c1_1	YES			YES								YES																						YES
MRPL4	c1_3	c1_6	c1_15	c1_46		3	1.26299	0.700533	c1_46	c1_46	c1_46	c1_1		YES			YES									YES
MRVI1	c1_2	c1_5	c1_13		5	2.18565	0.610558	NA	NA	c1_2	c1_1	YES			YES								YES
ABCA3	c1_3	c1_6	c1_16		5	2.24695	0.315674	c1_16	c1_16	c1_16	c1_1		YES			YES										YES
SEMA3D	c1_2	c1_5	c1_14	c1_38	c1_67		3	1.19477	0.357307	c1_67	c1_14	c1_2	c1_1	YES			YES									YES																							YES
LOC110482153	c1_3	c1_6	c1_15	c1_41		1	0.505664	NaN	c1_41	c1_41	c1_41	c1_1		YES			YES									YES
OPTN	c1_3	c1_7	c1_19	c1_50		5	2.50485	0.708134	c1_50	c1_7	c1_7	c1_1		YES				YES												YES
LOC110482498	c1_3	c1_6	c1_15	c1_40		4	1.73372	0.470604	c1_40	c1_40	c1_40	c1_1		YES			YES									YES
SLC6A2	c1_2	c1_5	c1_14	c1_38	c1_71		5	2.24279	0.32001	c1_71	c1_14	c1_2	c1_1	YES			YES									YES																							YES
LINGO3	c1_2	c1_4	c1_9	c1_29		3	1.27503	0.331134	c1_29	c1_4	c1_2	c1_1	YES		YES					YES																				YES
LOC116183946	c1_2	c1_4	c1_9	c1_27	c1_59		2	0.890749	0	c1_59	c1_4	c1_2	c1_1	YES		YES					YES																		YES
NIPA2	c1_3	c1_6	c1_17	c1_49		2	0.95688	0	c1_49	c1_17	c1_17	c1_1		YES			YES											YES
FEM1B	c1_3	c1_7	c1_19	c1_50		3	1.24479	1	c1_50	c1_7	c1_7	c1_1		YES				YES												YES
FERMT1	c1_2	c1_5	c1_13		8	3.43571	0.324708	NA	NA	c1_2	c1_1	YES			YES								YES
MAT2A	c1_2	c1_5	c1_13		1	0.503744	NaN	NA	NA	c1_2	c1_1	YES			YES								YES
SCD	c1_2	c1_5	c1_14	c1_38	c1_67		4	1.60811	0.507353	c1_67	c1_14	c1_2	c1_1	YES			YES									YES																							YES
RNF19B	c1_3	c1_6	c1_15	c1_46		4	1.72169	0.697152	c1_46	c1_46	c1_46	c1_1		YES			YES									YES
KIAA0895L	c1_3	c1_6	c1_15	c1_40		6	2.63596	0.424016	c1_40	c1_40	c1_40	c1_1		YES			YES									YES
NAIF1	c1_2	c1_4	c1_12		3	1.37552	0.682961	c1_12	c1_4	c1_2	c1_1	YES		YES								YES
SNX10	c1_3	c1_6	c1_16		12	5.66105	0.238803	c1_16	c1_16	c1_16	c1_1		YES			YES										YES
LMBRD2	c1_3	c1_7	c1_19		4	1.66145	0.347793	NA	c1_7	c1_7	c1_1		YES				YES												YES
CERS5	c1_2	c1_5	c1_14	c1_38	c1_67		6	2.57757	0.531886	c1_67	c1_14	c1_2	c1_1	YES			YES									YES																							YES
QRFPR	c1_3	c1_6	c1_15	c1_40		5	2.28941	0.59146	c1_40	c1_40	c1_40	c1_1		YES			YES									YES
AK4	c1_3	c1_6	c1_17	c1_47	c1_74		5	2.37078	0.39522	c1_74	c1_17	c1_17	c1_1		YES			YES											YES
LRRN1	c1_3	c1_6	c1_16		4	1.82254	0.511312	c1_16	c1_16	c1_16	c1_1		YES			YES										YES
PHLDA2	c1_2	c1_5	c1_14	c1_38	c1_67		4	1.58232	0.667756	c1_67	c1_14	c1_2	c1_1	YES			YES									YES																							YES
TRMT112	c1_2	c1_5	c1_13	c1_34	c1_60		2	0.928413	1	c1_60	c1_60	c1_2	c1_1	YES			YES								YES																					YES
NET1	c1_3	c1_6	c1_15	c1_40		4	1.92817	0.666667	c1_40	c1_40	c1_40	c1_1		YES			YES									YES
GADD45B	c1_3	c1_7	c1_20		2	0.923502	1	c1_20	c1_7	c1_7	c1_1		YES				YES													YES
BRWD1	c1_2	c1_5	c1_13		3	1.27333	1	NA	NA	c1_2	c1_1	YES			YES								YES
RXRA	c1_3	c1_6	c1_15	c1_41		3	1.27163	0.341093	c1_41	c1_41	c1_41	c1_1		YES			YES									YES
DECR2	c1_3	c1_6	c1_17	c1_47	c1_75		4	1.83678	0.171897	c1_75	c1_17	c1_17	c1_1		YES			YES											YES
SVOP	c1_2	c1_4	c1_9	c1_27	c1_57		4	1.72554	0.684463	c1_57	c1_4	c1_2	c1_1	YES		YES					YES																		YES
CHM	c1_3	c1_6	c1_16		4	1.7576	0	c1_16	c1_16	c1_16	c1_1		YES			YES										YES
CENPW	c1_2	c1_5	c1_14	c1_39		10	4.44885	0.246809	c1_39	c1_14	c1_2	c1_1	YES			YES									YES																								YES
AK5	c1_3	c1_8	c1_25		7	3.08046	0.238082	c1_25	c1_8	c1_8	c1_1		YES					YES																	YES
CHGA	c1_3	c1_6	c1_17	c1_49		3	1.35404	0.670576	c1_49	c1_17	c1_17	c1_1		YES			YES											YES
OSBPL8	c1_2	c1_4	c1_10		3	1.32115	0.341374	c1_10	c1_4	c1_2	c1_1	YES		YES						YES
FOXO3	c1_2	c1_5	c1_13	c1_35	c1_65		6	2.84447	0.46951	c1_65	c1_35	c1_2	c1_1	YES			YES								YES																						YES
IRS4	c1_2	c1_5	c1_13	c1_34	c1_60		4	1.9171	0.845366	c1_60	c1_60	c1_2	c1_1	YES			YES								YES																					YES
LOC110467865	c1_3	c1_8	c1_22		7	3.21057	0.185718	c1_22	c1_8	c1_8	c1_1		YES					YES														YES
AACS	c1_2	c1_5	c1_13	c1_35	c1_65		3	1.27782	1	c1_65	c1_35	c1_2	c1_1	YES			YES								YES																						YES
OXTR	c1_2	c1_5	c1_13		4	1.70404	0.852121	NA	NA	c1_2	c1_1	YES			YES								YES
TMSB15B	c1_3	c1_6	c1_15	c1_41		4	2.46653	0.840096	c1_41	c1_41	c1_41	c1_1		YES			YES									YES
CNKSR2	c1_2	c1_5	c1_14	c1_38	c1_69		6	2.54978	0.478934	c1_69	c1_14	c1_2	c1_1	YES			YES									YES																							YES
LOC110477548	c1_3	c1_7	c1_19	c1_50		3	1.18902	1	c1_50	c1_7	c1_7	c1_1		YES				YES												YES
UBL5	c1_3	c1_6	c1_15	c1_40		1	0.49803	NaN	c1_40	c1_40	c1_40	c1_1		YES			YES									YES
SLC15A2	c1_2	c1_5	c1_13	c1_35	c1_65		3	1.29885	1	c1_65	c1_35	c1_2	c1_1	YES			YES								YES																						YES
LOC110477087	c1_3	c1_7	c1_19	c1_50		3	1.23056	0.3544	c1_50	c1_7	c1_7	c1_1		YES				YES												YES
NXPE3	c1_3	c1_6	c1_15	c1_40		7	2.91459	0.100134	c1_40	c1_40	c1_40	c1_1		YES			YES									YES
LOC110469030	c1_3	c1_6	c1_15	c1_40		4	1.71915	0.6771	c1_40	c1_40	c1_40	c1_1		YES			YES									YES
LOC110483807	c1_3	c1_6	c1_15	c1_40		4	2.05051	0.825386	c1_40	c1_40	c1_40	c1_1		YES			YES									YES
DPM1	c1_2	c1_5	c1_14	c1_39		3	1.23064	1	c1_39	c1_14	c1_2	c1_1	YES			YES									YES																								YES
CCDC80	c1_3	c1_7	c1_19		3	1.35909	1	NA	c1_7	c1_7	c1_1		YES				YES												YES
AMER2	c1_3	c1_6	c1_17	c1_49		6	2.45397	0.270568	c1_49	c1_17	c1_17	c1_1		YES			YES											YES
LOC110472113	c1_2	c1_5	c1_13	c1_35	c1_65		3	1.59274	1	c1_65	c1_35	c1_2	c1_1	YES			YES								YES																						YES
NFYA	c1_2	c1_5	c1_13	c1_34		4	1.88347	0.81937	NA	NA	c1_2	c1_1	YES			YES								YES																					YES
LOC110480671	c1_3	c1_6	c1_16		5	2.40498	0.408795	c1_16	c1_16	c1_16	c1_1		YES			YES										YES
NPRL3	c1_3	c1_6	c1_15	c1_40		3	1.44738	0.66482	c1_40	c1_40	c1_40	c1_1		YES			YES									YES
SIX3	c1_2	c1_4	c1_9	c1_28		3	1.42517	1	c1_28	c1_4	c1_2	c1_1	YES		YES					YES																			YES
LOC110471476	c1_2	c1_5	c1_13		4	1.70829	0.182337	NA	NA	c1_2	c1_1	YES			YES								YES
MBD3	c1_2	c1_5	c1_13	c1_34	c1_60		2	0.930405	0	c1_60	c1_60	c1_2	c1_1	YES			YES								YES																					YES
TNR	c1_3	c1_7	c1_19	c1_50		5	2.11919	0.486833	c1_50	c1_7	c1_7	c1_1		YES				YES												YES
CCNY	c1_2	c1_4	c1_9	c1_27		5	2.58797	0.712631	NA	c1_4	c1_2	c1_1	YES		YES					YES																		YES
ATXN1	c1_2	c1_5	c1_13	c1_34	c1_60		8	4.17814	0.477958	c1_60	c1_60	c1_2	c1_1	YES			YES								YES																					YES
CACNB4	c1_2	c1_4	c1_9	c1_30		2	0.867207	1	c1_30	c1_4	c1_2	c1_1	YES		YES					YES																					YES
CACFD1	c1_2	c1_4	c1_10		6	2.4272	0.342601	c1_10	c1_4	c1_2	c1_1	YES		YES						YES
NUTF2	c1_2	c1_4	c1_9	c1_27	c1_55		3	1.56312	1	c1_55	c1_4	c1_2	c1_1	YES		YES					YES																		YES
SMC3	c1_3	c1_7	c1_19	c1_50		5	2.30482	0.294046	c1_50	c1_7	c1_7	c1_1		YES				YES												YES
GPC6	c1_2	c1_5	c1_14	c1_38	c1_67		3	1.26972	0.326393	c1_67	c1_14	c1_2	c1_1	YES			YES									YES																							YES
LOC110470722	c1_2	c1_5	c1_14	c1_38	c1_67		3	1.30465	0.35516	c1_67	c1_14	c1_2	c1_1	YES			YES									YES																							YES
CRYZL1	c1_2	c1_5	c1_14	c1_39		3	1.25257	0.634478	c1_39	c1_14	c1_2	c1_1	YES			YES									YES																								YES
RALY	c1_2	c1_4	c1_12		6	2.61173	0.260792	c1_12	c1_4	c1_2	c1_1	YES		YES								YES
FILIP1L	c1_3	c1_6	c1_15	c1_40		4	1.666	0.321007	c1_40	c1_40	c1_40	c1_1		YES			YES									YES
SPG7	c1_2	c1_5	c1_13	c1_34	c1_60		3	1.39478	0.333825	c1_60	c1_60	c1_2	c1_1	YES			YES								YES																					YES
FRYL	c1_2	c1_5	c1_14	c1_38	c1_67	c1_1	c1_2	c1_5	c1_14	c1_38	20	9.36265	0.163217	c1_67	c1_14	c1_2	c1_1	YES			YES									YES
SLCO3A1	c1_2	c1_4	c1_9	c1_31		5	2.02769	0.72453	c1_31	c1_4	c1_2	c1_1	YES		YES					YES																						YES
ZFAND5	c1_2	c1_4	c1_9	c1_27		1	0.491246	NaN	NA	c1_4	c1_2	c1_1	YES		YES					YES																		YES
TDG	c1_3	c1_7	c1_20		3	1.22791	1	c1_20	c1_7	c1_7	c1_1		YES				YES													YES
COBLL1	c1_3	c1_6	c1_17	c1_47	c1_74		3	1.30423	0.322252	c1_74	c1_17	c1_17	c1_1		YES			YES											YES
PLP1	c1_2	c1_5	c1_13	c1_35	c1_65		3	1.3396	1	c1_65	c1_35	c1_2	c1_1	YES			YES								YES																						YES
TYW3	c1_2	c1_5	c1_13	c1_35	c1_65		2	0.857132	1	c1_65	c1_35	c1_2	c1_1	YES			YES								YES																						YES
CACNG5	c1_3	c1_6	c1_18	c1_18	4	1.80423	0.333333	c1_18	c1_18	c1_18	c1_1		YES			YES												YES
UBALD2	c1_3	c1_6	c1_15		1	0.490481	NaN	NA	NA	NA	c1_1		YES			YES									YES
USB1	c1_3	c1_7	c1_20		5	2.10412	0.202189	c1_20	c1_7	c1_7	c1_1		YES				YES													YES
LOC110473153	c1_3	c1_7	c1_20		2	0.949581	1	c1_20	c1_7	c1_7	c1_1		YES				YES													YES
CCT7	c1_3	c1_6	c1_15	c1_40		2	1.08954	1	c1_40	c1_40	c1_40	c1_1		YES			YES									YES
ABCC4	c1_2	c1_5	c1_13	c1_34	c1_60		3	1.23795	0.697695	c1_60	c1_60	c1_2	c1_1	YES			YES								YES																					YES
MTMR9	c1_3	c1_6	c1_15	c1_40		12	5.27221	0.194826	c1_40	c1_40	c1_40	c1_1		YES			YES									YES
LHPP	c1_2	c1_5	c1_13		1	0.489173	NaN	NA	NA	c1_2	c1_1	YES			YES								YES
GTF2F2	c1_3	c1_7	c1_19	c1_50		2	0.986107	1	c1_50	c1_7	c1_7	c1_1		YES				YES												YES
FKBP5	c1_2	c1_5	c1_13	c1_34		2	0.877979	1	NA	NA	c1_2	c1_1	YES			YES								YES																					YES
RBFOX2	c1_2	c1_5	c1_13	c1_34	c1_60		4	2.06468	0.522898	c1_60	c1_60	c1_2	c1_1	YES			YES								YES																					YES
MRPS10	c1_3	c1_6	c1_17	c1_49	c1_1	c1_3	c1_6	16	6.9031	0.189353	c1_49	c1_17	c1_17	c1_1		YES			YES											YES
SERPINH1	c1_2	c1_5	c1_14	c1_38	c1_67		5	2.28898	0.610383	c1_67	c1_14	c1_2	c1_1	YES			YES									YES																							YES
LOC116183539	c1_3	c1_6	c1_15	c1_40		3	1.54786	1	c1_40	c1_40	c1_40	c1_1		YES			YES									YES
SNRPA	c1_2	c1_5	c1_14	c1_38	c1_67		5	2.32363	0.29521	c1_67	c1_14	c1_2	c1_1	YES			YES									YES																							YES
NPW	c1_2	c1_5	c1_13	c1_35	c1_65		4	1.6879	0.168903	c1_65	c1_35	c1_2	c1_1	YES			YES								YES																						YES
NSRP1	c1_3	c1_7	c1_19	c1_50	c1_1	c1_3	c1_7	c1_19	c1_50	18	9.84063	0.211759	c1_50	c1_7	c1_7	c1_1		YES				YES												YES
SLC9A6	c1_2	c1_4	c1_9	c1_27	c1_54		4	1.7282	0.15625	c1_54	c1_4	c1_2	c1_1	YES		YES					YES																		YES
LOC110470690	c1_2	c1_4	c1_9	c1_33		3	1.46597	0.326084	c1_33	c1_4	c1_2	c1_1	YES		YES					YES																								YES
SSTR2	c1_2	c1_4	c1_9	c1_27	c1_55		1	0.487504	NaN	c1_55	c1_4	c1_2	c1_1	YES		YES					YES																		YES
RD3	c1_3	c1_8	c1_22		3	1.34708	0.31915	c1_22	c1_8	c1_8	c1_1		YES					YES														YES
FAM171A1	c1_2	c1_5	c1_13	c1_34	c1_60		5	2.06237	0.401259	c1_60	c1_60	c1_2	c1_1	YES			YES								YES																					YES
MED13L	c1_2	c1_4	c1_9	c1_27	c1_55		3	1.25104	0.342235	c1_55	c1_4	c1_2	c1_1	YES		YES					YES																		YES
CGNL1	c1_3	c1_6	c1_15	c1_40		2	0.82122	1	c1_40	c1_40	c1_40	c1_1		YES			YES									YES
SGCB	c1_3	c1_6	c1_17	c1_49		8	3.41188	0.253848	c1_49	c1_17	c1_17	c1_1		YES			YES											YES
LOC110479303	c1_2	c1_4	c1_9	c1_28		3	1.31119	0.678905	c1_28	c1_4	c1_2	c1_1	YES		YES					YES																			YES
CENPU	c1_2	c1_4	c1_12		3	1.27953	0	c1_12	c1_4	c1_2	c1_1	YES		YES								YES
STMN1	c1_2	c1_5	c1_13	c1_34	c1_60		3	1.61969	1	c1_60	c1_60	c1_2	c1_1	YES			YES								YES																					YES
SNCA	c1_3	c1_8	c1_22		4	1.75421	0.666667	c1_22	c1_8	c1_8	c1_1		YES					YES														YES
CLEC3B	c1_2	c1_5	c1_14	c1_38	c1_67		9	4.25034	0.432184	c1_67	c1_14	c1_2	c1_1	YES			YES									YES																							YES
RPUSD3	c1_3	c1_6	c1_15	c1_40		1	0.485298	NaN	c1_40	c1_40	c1_40	c1_1		YES			YES									YES
UBR2	c1_2	c1_5	c1_13	c1_34	c1_60		3	1.26159	1	c1_60	c1_60	c1_2	c1_1	YES			YES								YES																					YES
METTL23	c1_3	c1_6	c1_15	c1_41		1	0.484824	NaN	c1_41	c1_41	c1_41	c1_1		YES			YES									YES
ATP13A3	c1_2	c1_5	c1_13	c1_34	c1_60		4	1.66939	0.841867	c1_60	c1_60	c1_2	c1_1	YES			YES								YES																					YES
PSMD2	c1_3	c1_7	c1_19	c1_50		4	1.98635	0.858275	c1_50	c1_7	c1_7	c1_1		YES				YES												YES
KIAA0040	c1_2	c1_5	c1_14	c1_38	c1_67		1	0.484004	NaN	c1_67	c1_14	c1_2	c1_1	YES			YES									YES																							YES
LRRC58	c1_2	c1_5	c1_13		4	1.70622	0.825794	NA	NA	c1_2	c1_1	YES			YES								YES
CYFIP1	c1_3	c1_6	c1_15	c1_40		3	1.21843	0.698446	c1_40	c1_40	c1_40	c1_1		YES			YES									YES
KLF9	c1_2	c1_4	c1_9	c1_31		3	1.298	1	c1_31	c1_4	c1_2	c1_1	YES		YES					YES																						YES
LOC110478247	c1_2	c1_4	c1_9	c1_27	c1_55		1	0.483171	NaN	c1_55	c1_4	c1_2	c1_1	YES		YES					YES																		YES
NFIC	c1_2	c1_5	c1_13	c1_35	c1_65		3	1.41549	1	c1_65	c1_35	c1_2	c1_1	YES			YES								YES																						YES
HIPK1	c1_2	c1_5	c1_14	c1_38	c1_67		3	1.17208	0.705757	c1_67	c1_14	c1_2	c1_1	YES			YES									YES																							YES
KANK3	c1_2	c1_5	c1_13	c1_35	c1_65		2	0.947604	1	c1_65	c1_35	c1_2	c1_1	YES			YES								YES																						YES
LOC116183103	c1_2	c1_4	c1_12		2	0.852984	1	c1_12	c1_4	c1_2	c1_1	YES		YES								YES
POLB	c1_2	c1_4	c1_9		1	0.481714	NaN	NA	c1_4	c1_2	c1_1	YES		YES					YES
AP3B2	c1_3	c1_6	c1_15	c1_40		7	3.22601	0.394364	c1_40	c1_40	c1_40	c1_1		YES			YES									YES
ERBB4	c1_2	c1_4	c1_9	c1_27	c1_58		4	1.58612	0.530383	c1_58	c1_4	c1_2	c1_1	YES		YES					YES																		YES
KBTBD8	c1_2	c1_5	c1_13	c1_34	c1_64		5	2.19147	0.408357	c1_64	c1_64	c1_2	c1_1	YES			YES								YES																					YES
RTF2	c1_2	c1_5	c1_14	c1_38	c1_67		3	1.46705	1	c1_67	c1_14	c1_2	c1_1	YES			YES									YES																							YES
LHX9	c1_3	c1_6	c1_15	c1_40		2	0.877284	0	c1_40	c1_40	c1_40	c1_1		YES			YES									YES
PPIP5K2	c1_3	c1_7	c1_19	c1_51		3	1.29354	0.32429	c1_51	c1_7	c1_7	c1_1		YES				YES												YES
ZBTB43	c1_3	c1_6	c1_15	c1_40		3	1.28945	0	c1_40	c1_40	c1_40	c1_1		YES			YES									YES
MYO1B	c1_2	c1_4	c1_9	c1_27	c1_55		4	1.59097	0.476452	c1_55	c1_4	c1_2	c1_1	YES		YES					YES																		YES
PCDH11X	c1_2	c1_4	c1_9	c1_29		5	2.0636	0.400798	c1_29	c1_4	c1_2	c1_1	YES		YES					YES																				YES
CAB39L	c1_3	c1_6	c1_16		4	1.72414	0.666667	c1_16	c1_16	c1_16	c1_1		YES			YES										YES
ABHD17A	c1_3	c1_6	c1_15	c1_40		3	1.17067	0.705063	c1_40	c1_40	c1_40	c1_1		YES			YES									YES
ARID1B	c1_2	c1_5	c1_13	c1_34	c1_60		4	1.84624	0.167933	c1_60	c1_60	c1_2	c1_1	YES			YES								YES																					YES
LRRK2	c1_3	c1_8	c1_22		2	0.879845	1	c1_22	c1_8	c1_8	c1_1		YES					YES														YES
LGI2	c1_3	c1_6	c1_17	c1_49		2	0.849771	0	c1_49	c1_17	c1_17	c1_1		YES			YES											YES
VPS16	c1_3	c1_6	c1_15	c1_40		3	1.31264	0.317218	c1_40	c1_40	c1_40	c1_1		YES			YES									YES
GAS7	c1_2	c1_5	c1_13	c1_34		2	0.802394	1	NA	NA	c1_2	c1_1	YES			YES								YES																					YES
LOC110473194	c1_3	c1_6	c1_18		2	0.970156	1	c1_18	c1_18	c1_18	c1_1		YES			YES												YES
NRP1	c1_3	c1_7	c1_19	c1_50		9	4.35562	0.321449	c1_50	c1_7	c1_7	c1_1		YES				YES												YES
TUT7	c1_3	c1_7	c1_19	c1_50		2	0.931849	1	c1_50	c1_7	c1_7	c1_1		YES				YES												YES
MARCKS	c1_2	c1_5	c1_13	c1_34	c1_60		4	1.6719	0.853927	c1_60	c1_60	c1_2	c1_1	YES			YES								YES																					YES
NHLRC1	c1_3	c1_6	c1_15		1	0.479189	NaN	NA	NA	NA	c1_1		YES			YES									YES
HDGFL2	c1_3	c1_6	c1_17	c1_48		3	1.30463	0.673555	c1_48	c1_17	c1_17	c1_1		YES			YES											YES
LOC116183187	c1_3	c1_6	c1_17	c1_47	c1_74		3	1.47693	1	c1_74	c1_17	c1_17	c1_1		YES			YES											YES
NR4A3	c1_2	c1_4	c1_9	c1_27	c1_55		6	2.79136	0.34504	c1_55	c1_4	c1_2	c1_1	YES		YES					YES																		YES
ZBTB4	c1_2	c1_5	c1_13	c1_37		5	2.17348	0.0897978	c1_37	c1_37	c1_2	c1_1	YES			YES								YES																							YES
CFAP53	c1_3	c1_7	c1_19		3	1.2134	1	NA	c1_7	c1_7	c1_1		YES				YES												YES
PGM2	c1_2	c1_4	c1_9	c1_31		4	1.79242	0.833638	c1_31	c1_4	c1_2	c1_1	YES		YES					YES																						YES
FBXL16	c1_3	c1_8	c1_22		3	1.29703	1	c1_22	c1_8	c1_8	c1_1		YES					YES														YES
RHPN1	c1_3	c1_6	c1_15	c1_40		3	1.31423	1	c1_40	c1_40	c1_40	c1_1		YES			YES									YES
VPS28	c1_3	c1_6	c1_15	c1_40		3	1.64888	1	c1_40	c1_40	c1_40	c1_1		YES			YES									YES
ANKLE2	c1_2	c1_5	c1_13	c1_34	c1_60		6	2.59066	0.465286	c1_60	c1_60	c1_2	c1_1	YES			YES								YES																					YES
TTF1	c1_3	c1_6	c1_16		2	0.82037	1	c1_16	c1_16	c1_16	c1_1		YES			YES										YES
LOC110484351	c1_3	c1_6	c1_17	c1_47	c1_74		3	1.23928	1	c1_74	c1_17	c1_17	c1_1		YES			YES											YES
CHPF	c1_2	c1_5	c1_13	c1_37		4	1.70943	0.500186	c1_37	c1_37	c1_2	c1_1	YES			YES								YES																							YES
LOC110482809	c1_3	c1_7	c1_20		5	2.11883	0.321692	c1_20	c1_7	c1_7	c1_1		YES				YES													YES
RPA2	c1_2	c1_5	c1_14	c1_38	c1_70		1	0.476936	NaN	c1_70	c1_14	c1_2	c1_1	YES			YES									YES																							YES
RPS26	c1_3	c1_6	c1_15	c1_41		2	0.821366	1	c1_41	c1_41	c1_41	c1_1		YES			YES									YES
LONP1	c1_3	c1_6	c1_17	c1_49		6	2.43168	0.276892	c1_49	c1_17	c1_17	c1_1		YES			YES											YES
JAK1	c1_2	c1_5	c1_13	c1_34		2	0.826408	1	NA	NA	c1_2	c1_1	YES			YES								YES																					YES
KDM2A	c1_3	c1_6	c1_15	c1_40		5	2.24742	0.528989	c1_40	c1_40	c1_40	c1_1		YES			YES									YES
SOGA1	c1_3	c1_6	c1_15	c1_42		3	1.34827	0	NA	c1_42	c1_42	c1_1		YES			YES									YES
MVB12B	c1_2	c1_5	c1_14	c1_38	c1_67		2	0.826511	1	c1_67	c1_14	c1_2	c1_1	YES			YES									YES																							YES
LOC110472111	c1_3	c1_6	c1_15	c1_40		3	1.23815	0.326505	c1_40	c1_40	c1_40	c1_1		YES			YES									YES
MBNL2	c1_3	c1_7	c1_19	c1_50		6	2.49934	0.40176	c1_50	c1_7	c1_7	c1_1		YES				YES												YES
VAMP8	c1_3	c1_6	c1_15	c1_40		4	1.91713	0.666667	c1_40	c1_40	c1_40	c1_1		YES			YES									YES
STUB1	c1_3	c1_6	c1_17	c1_49		1	0.474777	NaN	c1_49	c1_17	c1_17	c1_1		YES			YES											YES
PTAR1	c1_2	c1_5	c1_13	c1_34	c1_60		3	1.24548	1	c1_60	c1_60	c1_2	c1_1	YES			YES								YES																					YES
EPB41L2	c1_3	c1_7	c1_19	c1_50		5	2.03478	0.301324	c1_50	c1_7	c1_7	c1_1		YES				YES												YES
EGF	c1_3	c1_6	c1_15	c1_46		2	0.818039	1	c1_46	c1_46	c1_46	c1_1		YES			YES									YES
QSOX2	c1_2	c1_5	c1_13	c1_35	c1_66		1	0.47435	NaN	c1_66	c1_35	c1_2	c1_1	YES			YES								YES																						YES
NBL1	c1_3	c1_6	c1_15	c1_40		2	0.901878	1	c1_40	c1_40	c1_40	c1_1		YES			YES									YES
LOC110484246	c1_3	c1_6	c1_15	c1_40		4	1.70907	0.166773	c1_40	c1_40	c1_40	c1_1		YES			YES									YES
LOC110483195	c1_2	c1_5	c1_14	c1_38	c1_67		3	1.25877	0.688128	c1_67	c1_14	c1_2	c1_1	YES			YES									YES																							YES
CEP83	c1_3	c1_6	c1_17	c1_49		2	0.86405	1	c1_49	c1_17	c1_17	c1_1		YES			YES											YES
LOC110483456	c1_3	c1_7	c1_19	c1_50		1	0.473272	NaN	c1_50	c1_7	c1_7	c1_1		YES				YES												YES
FAAH2	c1_3	c1_6	c1_15	c1_40		5	2.33567	0.501114	c1_40	c1_40	c1_40	c1_1		YES			YES									YES
BRD2	c1_3	c1_7	c1_21		2	0.879806	1	c1_21	c1_7	c1_7	c1_1		YES				YES														YES
UBAP2L	c1_3	c1_6	c1_15	c1_45		4	1.71647	0.511555	c1_45	c1_45	c1_45	c1_1		YES			YES									YES
AFDN	c1_3	c1_6	c1_15	c1_46		10	4.58106	0.27175	c1_46	c1_46	c1_46	c1_1		YES			YES									YES
PRICKLE1	c1_3	c1_6	c1_15	c1_40		1	0.471435	NaN	c1_40	c1_40	c1_40	c1_1		YES			YES									YES
ERLIN2	c1_2	c1_4	c1_9	c1_33		6	2.61351	0.398177	c1_33	c1_4	c1_2	c1_1	YES		YES					YES																								YES
P3H1	c1_2	c1_5	c1_14	c1_38	c1_67		1	0.471191	NaN	c1_67	c1_14	c1_2	c1_1	YES			YES									YES																							YES
TYR	c1_3	c1_6	c1_16		2	0.883501	0	c1_16	c1_16	c1_16	c1_1		YES			YES										YES
LOC110475905	c1_3	c1_6	c1_15	c1_40		4	1.9182	0.683502	c1_40	c1_40	c1_40	c1_1		YES			YES									YES
USP5	c1_2	c1_4	c1_9	c1_27	c1_54		2	0.932485	0	c1_54	c1_4	c1_2	c1_1	YES		YES					YES																		YES
RGS9	c1_3	c1_8	c1_26		4	1.86381	0.342688	c1_26	c1_8	c1_8	c1_1		YES					YES																		YES
DLK1	c1_2	c1_4	c1_9	c1_33		3	1.28734	1	c1_33	c1_4	c1_2	c1_1	YES		YES					YES																								YES
SCUBE1	c1_2	c1_4	c1_9	c1_27	c1_59		7	2.98905	0.341238	c1_59	c1_4	c1_2	c1_1	YES		YES					YES																		YES
GPR78	c1_3	c1_6	c1_17	c1_47	c1_74		4	1.66929	0.478819	c1_74	c1_17	c1_17	c1_1		YES			YES											YES
CACNA1C	c1_2	c1_4	c1_9	c1_27	c1_55		3	1.27199	1	c1_55	c1_4	c1_2	c1_1	YES		YES					YES																		YES
NFIL3	c1_3	c1_6	c1_15		1	0.470252	NaN	NA	NA	NA	c1_1		YES			YES									YES
TRAPPC1	c1_2	c1_5	c1_14	c1_38	c1_67		4	1.88172	0.500079	c1_67	c1_14	c1_2	c1_1	YES			YES									YES																							YES
TMSB4X	c1_3	c1_6	c1_15		4	1.93628	0.504796	NA	NA	NA	c1_1		YES			YES									YES
GPAA1	c1_2	c1_4	c1_9	c1_32		4	1.54793	0.484181	c1_32	c1_4	c1_2	c1_1	YES		YES					YES																							YES
BTF3L4	c1_2	c1_5	c1_13	c1_34	c1_60		3	1.28832	1	c1_60	c1_60	c1_2	c1_1	YES			YES								YES																					YES
SPOPL	c1_2	c1_5	c1_14	c1_38	c1_68		4	1.63735	0.668339	c1_68	c1_14	c1_2	c1_1	YES			YES									YES																							YES
WNT7B	c1_2	c1_5	c1_13	c1_34	c1_62	c1_80		3	1.4361	1	c1_80	c1_62	c1_2	c1_1	YES			YES								YES																					YES
ILRUN	c1_3	c1_6	c1_15	c1_46		3	1.23724	1	c1_46	c1_46	c1_46	c1_1		YES			YES									YES
MRPL18	c1_3	c1_6	c1_15	c1_41		3	1.2845	0.317161	c1_41	c1_41	c1_41	c1_1		YES			YES									YES
METTL21A	c1_3	c1_6	c1_17	c1_47	c1_76		2	0.838739	1	c1_76	c1_17	c1_17	c1_1		YES			YES											YES
AUH	c1_3	c1_6	c1_16		2	0.906506	1	c1_16	c1_16	c1_16	c1_1		YES			YES										YES
BMERB1	c1_3	c1_7	c1_19	c1_50		4	1.90351	0.532106	c1_50	c1_7	c1_7	c1_1		YES				YES												YES
LOC110484124	c1_2	c1_5	c1_14	c1_38	c1_67		2	0.90342	0	c1_67	c1_14	c1_2	c1_1	YES			YES									YES																							YES
SERINC2	c1_2	c1_4	c1_12		4	1.68187	0.335939	c1_12	c1_4	c1_2	c1_1	YES		YES								YES
MICALL2	c1_3	c1_6	c1_15	c1_40		4	1.50706	0.181257	c1_40	c1_40	c1_40	c1_1		YES			YES									YES
SLF1	c1_3	c1_6	c1_17	c1_47	c1_77		2	0.859251	1	c1_77	c1_17	c1_17	c1_1		YES			YES											YES
PDZRN3	c1_3	c1_7	c1_19	c1_50		4	1.66687	0.505577	c1_50	c1_7	c1_7	c1_1		YES				YES												YES
HMG20A	c1_2	c1_5	c1_13	c1_35	c1_65		4	1.66594	0.839791	c1_65	c1_35	c1_2	c1_1	YES			YES								YES																						YES
RNFT2	c1_2	c1_5	c1_13	c1_34	c1_60		5	1.99072	0.384258	c1_60	c1_60	c1_2	c1_1	YES			YES								YES																					YES
LOC110473741	c1_3	c1_6	c1_15	c1_45		5	1.99222	0.289574	c1_45	c1_45	c1_45	c1_1		YES			YES									YES
CLMN	c1_3	c1_6	c1_15	c1_40		3	1.28658	0.318165	c1_40	c1_40	c1_40	c1_1		YES			YES									YES
NFIX	c1_3	c1_6	c1_17	c1_47		2	0.849957	1	NA	c1_17	c1_17	c1_1		YES			YES											YES
LOC110479953	c1_2	c1_5	c1_13	c1_34	c1_60		5	2.35441	0.698184	c1_60	c1_60	c1_2	c1_1	YES			YES								YES																					YES
GPR12	c1_3	c1_6	c1_17	c1_47	c1_74		1	0.467212	NaN	c1_74	c1_17	c1_17	c1_1		YES			YES											YES
PDE7B	c1_3	c1_8	c1_22		4	1.81828	0.827679	c1_22	c1_8	c1_8	c1_1		YES					YES														YES
LOC110482576	c1_3	c1_6	c1_15	c1_40		4	1.81144	0.505519	c1_40	c1_40	c1_40	c1_1		YES			YES									YES
GRIN3A	c1_3	c1_6	c1_18		3	1.27777	0.362864	c1_18	c1_18	c1_18	c1_1		YES			YES												YES
R3HDM1	c1_2	c1_5	c1_14	c1_38	c1_67		4	1.74425	0.834174	c1_67	c1_14	c1_2	c1_1	YES			YES									YES																							YES
LOC110471393	c1_2	c1_5	c1_13	c1_35	c1_66		2	0.873457	0	c1_66	c1_35	c1_2	c1_1	YES			YES								YES																						YES
FBXL5	c1_2	c1_4	c1_9	c1_33		12	4.84502	0.167218	c1_33	c1_4	c1_2	c1_1	YES		YES					YES																								YES
PER2	c1_3	c1_6	c1_15	c1_40		4	1.57733	0.666667	c1_40	c1_40	c1_40	c1_1		YES			YES									YES
LDAH	c1_3	c1_6	c1_17	c1_47	c1_77	c1_77	4	1.76685	0.326189	c1_77	c1_17	c1_17	c1_1		YES			YES											YES
OAF	c1_2	c1_4	c1_9	c1_27	c1_56	c1_79		2	0.901034	1	c1_79	c1_4	c1_2	c1_1	YES		YES					YES																		YES
JPH1	c1_2	c1_5	c1_14	c1_38	c1_67		5	2.36929	0.601593	c1_67	c1_14	c1_2	c1_1	YES			YES									YES																							YES
LOC110483639	c1_2	c1_5	c1_14	c1_38	c1_67		6	2.58215	0.339223	c1_67	c1_14	c1_2	c1_1	YES			YES									YES																							YES
ZBTB5	c1_2	c1_5	c1_13	c1_35	c1_65		1	0.465545	NaN	c1_65	c1_35	c1_2	c1_1	YES			YES								YES																						YES
ADCY9	c1_3	c1_6	c1_15	c1_46		3	1.13443	1	c1_46	c1_46	c1_46	c1_1		YES			YES									YES
GNL3	c1_3	c1_7	c1_19	c1_50		4	1.55726	0.652357	c1_50	c1_7	c1_7	c1_1		YES				YES												YES
RPUSD1	c1_3	c1_6	c1_15	c1_40		4	1.61736	0.30618	c1_40	c1_40	c1_40	c1_1		YES			YES									YES
NIPSNAP1	c1_2	c1_5	c1_14	c1_38	c1_67		2	0.870418	1	c1_67	c1_14	c1_2	c1_1	YES			YES									YES																							YES
FNDC3A	c1_2	c1_5	c1_14	c1_38	c1_67		7	3.41053	0.3357	c1_67	c1_14	c1_2	c1_1	YES			YES									YES																							YES
CBX7	c1_3	c1_6	c1_15	c1_40		4	1.72059	0.333333	c1_40	c1_40	c1_40	c1_1		YES			YES									YES
RPL14	c1_3	c1_6	c1_15	c1_40		8	3.98886	0.34072	c1_40	c1_40	c1_40	c1_1		YES			YES									YES
FAAP100	c1_3	c1_6	c1_15	c1_40		2	0.848999	1	c1_40	c1_40	c1_40	c1_1		YES			YES									YES
KLHDC8A	c1_3	c1_7		1	0.464731	NaN	NA	c1_7	c1_7	c1_1		YES				YES
ZNF142	c1_3	c1_6	c1_16		2	0.823901	1	c1_16	c1_16	c1_16	c1_1		YES			YES										YES
LOC110478284	c1_3	c1_6	c1_15	c1_40		4	1.75234	0.839213	c1_40	c1_40	c1_40	c1_1		YES			YES									YES
LRRC75B	c1_3	c1_6	c1_15	c1_40		3	1.22298	0.689849	c1_40	c1_40	c1_40	c1_1		YES			YES									YES
RALB	c1_3	c1_6	c1_17	c1_47		5	2.13912	0.302561	NA	c1_17	c1_17	c1_1		YES			YES											YES
LOC110483161	c1_3	c1_7	c1_19	c1_50		2	0.818636	1	c1_50	c1_7	c1_7	c1_1		YES				YES												YES
PIK3CD	c1_2	c1_4	c1_9	c1_27	c1_55		3	1.26745	0.352774	c1_55	c1_4	c1_2	c1_1	YES		YES					YES																		YES
KYAT1	c1_3	c1_7	c1_19	c1_50		8	3.30096	0.326258	c1_50	c1_7	c1_7	c1_1		YES				YES												YES
DAB2	c1_2	c1_5	c1_13	c1_34	c1_60		1	0.463555	NaN	c1_60	c1_60	c1_2	c1_1	YES			YES								YES																					YES
LOC110482120	c1_3	c1_6	c1_15	c1_46		2	0.857536	1	c1_46	c1_46	c1_46	c1_1		YES			YES									YES
OSBP2	c1_3	c1_6	c1_15	c1_40		3	1.36798	0.664453	c1_40	c1_40	c1_40	c1_1		YES			YES									YES
ATP7A	c1_3	c1_7	c1_20		2	0.806102	1	c1_20	c1_7	c1_7	c1_1		YES				YES													YES
LOC110467957	c1_3	c1_7	c1_20		2	0.796957	1	c1_20	c1_7	c1_7	c1_1		YES				YES													YES
STK39	c1_3	c1_6	c1_17	c1_49		1	0.462872	NaN	c1_49	c1_17	c1_17	c1_1		YES			YES											YES
SRSF2	c1_3	c1_7	c1_19	c1_50		2	0.859725	1	c1_50	c1_7	c1_7	c1_1		YES				YES												YES
LOX	c1_2	c1_5	c1_13	c1_35	c1_66		2	0.827327	0	c1_66	c1_35	c1_2	c1_1	YES			YES								YES																						YES
RABGGTB	c1_2	c1_5	c1_14	c1_38		1	0.462728	NaN	NA	c1_14	c1_2	c1_1	YES			YES									YES																							YES
ASTN2	c1_3	c1_6	c1_15	c1_40		3	1.2211	0.342878	c1_40	c1_40	c1_40	c1_1		YES			YES									YES
FBXO2	c1_3	c1_6	c1_15		4	1.67248	0.327743	NA	NA	NA	c1_1		YES			YES									YES
ATP2A3	c1_3	c1_8	c1_22		5	2.15639	0.498991	c1_22	c1_8	c1_8	c1_1		YES					YES														YES
NOG	c1_2	c1_4	c1_9	c1_28		1	0.461993	NaN	c1_28	c1_4	c1_2	c1_1	YES		YES					YES																			YES
PARG	c1_2	c1_5	c1_13		3	1.24004	1	NA	NA	c1_2	c1_1	YES			YES								YES
CD99	c1_3	c1_6	c1_15	c1_40		3	1.23128	1	c1_40	c1_40	c1_40	c1_1		YES			YES									YES
PTCHD1	c1_3	c1_6	c1_17	c1_47	c1_74		1	0.46156	NaN	c1_74	c1_17	c1_17	c1_1		YES			YES											YES
SLC44A5	c1_3	c1_7	c1_19	c1_50		3	1.32038	0.674757	c1_50	c1_7	c1_7	c1_1		YES				YES												YES
SV2C	c1_3	c1_6	c1_15	c1_40		1	0.461322	NaN	c1_40	c1_40	c1_40	c1_1		YES			YES									YES
WDR54	c1_3	c1_6	c1_15	c1_40		5	2.29597	0.513511	c1_40	c1_40	c1_40	c1_1		YES			YES									YES
TTL	c1_2	c1_4	c1_9	c1_27	c1_58		2	0.894114	0	c1_58	c1_4	c1_2	c1_1	YES		YES					YES																		YES
PFDN2	c1_3	c1_6	c1_15	c1_41		5	2.2203	0.501139	c1_41	c1_41	c1_41	c1_1		YES			YES									YES
PDPK1	c1_3	c1_6	c1_15	c1_40		1	0.460817	NaN	c1_40	c1_40	c1_40	c1_1		YES			YES									YES
TMEM179	c1_2	c1_4	c1_9	c1_27		5	2.80183	0.712932	NA	c1_4	c1_2	c1_1	YES		YES					YES																		YES
PDAP1	c1_3	c1_7	c1_19	c1_50		6	3.06502	0.607076	c1_50	c1_7	c1_7	c1_1		YES				YES												YES
VPS13A	c1_3	c1_7	c1_19	c1_50		4	1.62852	0.486716	c1_50	c1_7	c1_7	c1_1		YES				YES												YES
KCNA5	c1_2	c1_5	c1_13	c1_34	c1_60		4	1.61815	0.505663	c1_60	c1_60	c1_2	c1_1	YES			YES								YES																					YES
NHSL1	c1_3	c1_7	c1_19	c1_50		3	1.28478	0.336603	c1_50	c1_7	c1_7	c1_1		YES				YES												YES
MTHFD1	c1_3	c1_6	c1_15	c1_40		4	1.76509	0.492842	c1_40	c1_40	c1_40	c1_1		YES			YES									YES
KCNIP2	c1_3	c1_6	c1_15		3	1.2633	1	NA	NA	NA	c1_1		YES			YES									YES
PHGDH	c1_3	c1_6	c1_15	c1_40		1	0.46	NaN	c1_40	c1_40	c1_40	c1_1		YES			YES									YES
CALCRL	c1_3	c1_7	c1_20		2	0.796985	1	c1_20	c1_7	c1_7	c1_1		YES				YES													YES
RPH3A	c1_3	c1_7	c1_19	c1_50		1	0.459869	NaN	c1_50	c1_7	c1_7	c1_1		YES				YES												YES
PPID	c1_2	c1_4	c1_10		3	1.3436	1	c1_10	c1_4	c1_2	c1_1	YES		YES						YES
LOC110477965	c1_3	c1_6	c1_15	c1_41		4	1.98278	0.522567	c1_41	c1_41	c1_41	c1_1		YES			YES									YES
TNKS	c1_2	c1_5	c1_13		5	1.99036	0.405623	NA	NA	c1_2	c1_1	YES			YES								YES
COCH	c1_2	c1_5	c1_13	c1_34	c1_60		3	1.24895	0.315943	c1_60	c1_60	c1_2	c1_1	YES			YES								YES																					YES
PTGFR	c1_2	c1_4	c1_9	c1_27	c1_55		4	1.66157	0.669251	c1_55	c1_4	c1_2	c1_1	YES		YES					YES																		YES
SRP14	c1_3	c1_6	c1_15	c1_41		3	1.25065	0.347859	c1_41	c1_41	c1_41	c1_1		YES			YES									YES
ELFN2	c1_3	c1_6	c1_15	c1_46		3	1.27995	0.320452	c1_46	c1_46	c1_46	c1_1		YES			YES									YES
VIT	c1_2	c1_5	c1_14	c1_38	c1_67		2	0.908738	0	c1_67	c1_14	c1_2	c1_1	YES			YES									YES																							YES
LOC110478432	c1_3	c1_6	c1_15	c1_40		2	0.810114	1	c1_40	c1_40	c1_40	c1_1		YES			YES									YES
LOC110475525	c1_3	c1_6	c1_15	c1_40		5	2.03772	0.598004	c1_40	c1_40	c1_40	c1_1		YES			YES									YES
RNPC3	c1_2	c1_5	c1_14	c1_38		1	0.459375	NaN	NA	c1_14	c1_2	c1_1	YES			YES									YES																							YES
FAM155A	c1_2	c1_4	c1_9	c1_27	c1_55		2	0.810097	1	c1_55	c1_4	c1_2	c1_1	YES		YES					YES																		YES
PRKCB	c1_3	c1_6	c1_15	c1_40		2	0.855409	1	c1_40	c1_40	c1_40	c1_1		YES			YES									YES
RNASEH1	c1_3	c1_6	c1_15	c1_40		4	1.7239	0.168724	c1_40	c1_40	c1_40	c1_1		YES			YES									YES
LOC110475876	c1_3	c1_7	c1_19	c1_50		1	0.459061	NaN	c1_50	c1_7	c1_7	c1_1		YES				YES												YES
SSR4	c1_3	c1_6	c1_15	c1_40		3	1.46277	0.695462	c1_40	c1_40	c1_40	c1_1		YES			YES									YES
CACNG4	c1_2	c1_5	c1_13	c1_35	c1_66		3	1.15206	0.360426	c1_66	c1_35	c1_2	c1_1	YES			YES								YES																						YES
NYX	c1_3	c1_8	c1_25		5	2.04819	0.20109	c1_25	c1_8	c1_8	c1_1		YES					YES																	YES
SLC20A1	c1_2	c1_4	c1_9	c1_27	c1_52		3	1.46146	1	c1_52	c1_4	c1_2	c1_1	YES		YES					YES																		YES
CAB39	c1_2	c1_4	c1_10		6	2.52634	0.265174	c1_10	c1_4	c1_2	c1_1	YES		YES						YES
LOC110481399	c1_3	c1_6	c1_17	c1_49		1	0.458387	NaN	c1_49	c1_17	c1_17	c1_1		YES			YES											YES
PKP4	c1_3	c1_6	c1_16		3	1.20629	0	c1_16	c1_16	c1_16	c1_1		YES			YES										YES
SLC2A1	c1_3	c1_6	c1_15	c1_40		1	0.458242	NaN	c1_40	c1_40	c1_40	c1_1		YES			YES									YES
LOC110472673	c1_2	c1_4	c1_9	c1_32		5	2.08795	0.711003	c1_32	c1_4	c1_2	c1_1	YES		YES					YES																							YES
PLPP4	c1_2	c1_5	c1_13	c1_35	c1_65		5	2.44087	0.603987	c1_65	c1_35	c1_2	c1_1	YES			YES								YES																						YES
LAMA4	c1_2	c1_4	c1_11		3	1.26646	0.680829	c1_11	c1_4	c1_2	c1_1	YES		YES							YES
RWDD3	c1_3	c1_6	c1_17	c1_49		4	1.68393	0.521839	c1_49	c1_17	c1_17	c1_1		YES			YES											YES
LOC110482923	c1_3	c1_6	c1_15	c1_40		2	0.848898	1	c1_40	c1_40	c1_40	c1_1		YES			YES									YES
TMCO3	c1_2	c1_5	c1_13		3	1.24798	0.365537	NA	NA	c1_2	c1_1	YES			YES								YES
CEP162	c1_3	c1_7	c1_20		5	2.0171	0.508409	c1_20	c1_7	c1_7	c1_1		YES				YES													YES
RBM26	c1_2	c1_5	c1_13	c1_35	c1_65		1	0.456695	NaN	c1_65	c1_35	c1_2	c1_1	YES			YES								YES																						YES
GUCY1A2	c1_3	c1_7	c1_20		3	1.47311	1	c1_20	c1_7	c1_7	c1_1		YES				YES													YES
PDZD2	c1_3	c1_6	c1_17	c1_47	c1_74		1	0.456489	NaN	c1_74	c1_17	c1_17	c1_1		YES			YES											YES
ECHS1	c1_2	c1_5	c1_13		1	0.456413	NaN	NA	NA	c1_2	c1_1	YES			YES								YES
LOC116184485	c1_3	c1_6	c1_15	c1_46		2	0.81015	1	c1_46	c1_46	c1_46	c1_1		YES			YES									YES
F3	c1_3	c1_6	c1_15	c1_41		3	1.14622	1	c1_41	c1_41	c1_41	c1_1		YES			YES									YES
ACP6	c1_2	c1_5	c1_14	c1_38	c1_67		3	1.33725	0.645344	c1_67	c1_14	c1_2	c1_1	YES			YES									YES																							YES
LOC110474851	c1_3	c1_6	c1_15	c1_41		3	1.35279	1	c1_41	c1_41	c1_41	c1_1		YES			YES									YES
PDCD2	c1_3	c1_6	c1_17	c1_49		2	0.820521	0	c1_49	c1_17	c1_17	c1_1		YES			YES											YES
IKZF4	c1_2	c1_5	c1_14	c1_38	c1_67		2	0.842327	1	c1_67	c1_14	c1_2	c1_1	YES			YES									YES																							YES
CHTOP	c1_3	c1_6	c1_15	c1_40		2	0.892197	0	c1_40	c1_40	c1_40	c1_1		YES			YES									YES
TRNAH-GUG	c1_2	c1_5	c1_14	c1_38	c1_71		2	0.930641	0	c1_71	c1_14	c1_2	c1_1	YES			YES									YES																							YES
NT5DC2	c1_3	c1_6	c1_15	c1_41		3	1.24723	0.332924	c1_41	c1_41	c1_41	c1_1		YES			YES									YES
ZFAND2A	c1_2	c1_4	c1_10		3	1.2399	0.327069	c1_10	c1_4	c1_2	c1_1	YES		YES						YES
CHEK1	c1_3	c1_6	c1_15	c1_40		4	1.63666	0.481423	c1_40	c1_40	c1_40	c1_1		YES			YES									YES
MYDGF	c1_2	c1_4	c1_9	c1_31		3	1.23158	1	c1_31	c1_4	c1_2	c1_1	YES		YES					YES																						YES
EPB41L4A	c1_3	c1_7	c1_19	c1_51		1	0.454576	NaN	c1_51	c1_7	c1_7	c1_1		YES				YES												YES
HMGXB4	c1_2	c1_5	c1_13	c1_34	c1_61		4	1.89941	0.339119	c1_61	c1_61	c1_2	c1_1	YES			YES								YES																					YES
CCPG1	c1_3	c1_7	c1_19	c1_50		9	3.80189	0.289964	c1_50	c1_7	c1_7	c1_1		YES				YES												YES
SYTL1	c1_3	c1_6	c1_16		6	2.62317	0.277862	c1_16	c1_16	c1_16	c1_1		YES			YES										YES
EIF1AD	c1_3	c1_6	c1_15	c1_41		3	1.26601	0	c1_41	c1_41	c1_41	c1_1		YES			YES									YES
ITGA6	c1_3	c1_6	c1_15	c1_40		2	0.893122	0	c1_40	c1_40	c1_40	c1_1		YES			YES									YES
CSTA	c1_3	c1_6	c1_15	c1_40		5	2.0523	0.306566	c1_40	c1_40	c1_40	c1_1		YES			YES									YES
CUNH19orf53	c1_3	c1_6	c1_15	c1_40		4	1.66231	0.50053	c1_40	c1_40	c1_40	c1_1		YES			YES									YES
LOC110484917	c1_3	c1_7	c1_19	c1_50		6	2.78393	0.598392	c1_50	c1_7	c1_7	c1_1		YES				YES												YES
MTA1	c1_2	c1_5	c1_13	c1_34	c1_61		2	0.854171	1	c1_61	c1_61	c1_2	c1_1	YES			YES								YES																					YES
LOC110483408	c1_3	c1_7	c1_19	c1_50		4	1.63839	0.835724	c1_50	c1_7	c1_7	c1_1		YES				YES												YES
LOC110481227	c1_3	c1_6		4	1.57535	0.490551	NA	NA	NA	c1_1		YES			YES
RERE	c1_2	c1_5	c1_13	c1_35	c1_65		5	2.1242	0.183141	c1_65	c1_35	c1_2	c1_1	YES			YES								YES																						YES
LOC110472688	c1_2	c1_4	c1_10		3	1.30928	0.672404	c1_10	c1_4	c1_2	c1_1	YES		YES						YES
LOC110467600	c1_3	c1_6	c1_15	c1_41		1	0.451418	NaN	c1_41	c1_41	c1_41	c1_1		YES			YES									YES
B2M	c1_3	c1_6	c1_15	c1_41		5	2.45932	0.305362	c1_41	c1_41	c1_41	c1_1		YES			YES									YES
CUX2	c1_3	c1_6	c1_15	c1_40		3	1.2174	0	c1_40	c1_40	c1_40	c1_1		YES			YES									YES
LOC110469847	c1_3	c1_6	c1_17	c1_47	c1_76		6	2.43242	0.336315	c1_76	c1_17	c1_17	c1_1		YES			YES											YES
PPP1R1C	c1_3	c1_6	c1_15	c1_40		3	1.21268	0.320684	c1_40	c1_40	c1_40	c1_1		YES			YES									YES
TPCN1	c1_2	c1_5	c1_13	c1_37		2	0.784048	0	c1_37	c1_37	c1_2	c1_1	YES			YES								YES																							YES
TGFBR2	c1_2	c1_4	c1_9	c1_27	c1_55		2	0.789214	1	c1_55	c1_4	c1_2	c1_1	YES		YES					YES																		YES
IRAK2	c1_2	c1_5	c1_13	c1_35	c1_65		3	1.23459	0.326071	c1_65	c1_35	c1_2	c1_1	YES			YES								YES																						YES
GLRA2	c1_2	c1_5	c1_14	c1_38	c1_67		1	0.450543	NaN	c1_67	c1_14	c1_2	c1_1	YES			YES									YES																							YES
SERF2	c1_3	c1_6	c1_15	c1_43		3	1.18802	1	c1_43	c1_43	c1_43	c1_1		YES			YES									YES
SHMT2	c1_3	c1_6	c1_15	c1_40		2	0.986566	1	c1_40	c1_40	c1_40	c1_1		YES			YES									YES
NXNL2	c1_3	c1_8	c1_25		3	1.22725	0.319583	c1_25	c1_8	c1_8	c1_1		YES					YES																	YES
BYSL	c1_2	c1_4	c1_10		2	0.869255	0	c1_10	c1_4	c1_2	c1_1	YES		YES						YES
ETV1	c1_2	c1_5	c1_13	c1_35	c1_65		6	3.2261	0.636516	c1_65	c1_35	c1_2	c1_1	YES			YES								YES																						YES
CCND2	c1_2	c1_4	c1_9	c1_27	c1_55		3	1.14756	1	c1_55	c1_4	c1_2	c1_1	YES		YES					YES																		YES
RLF	c1_2	c1_5	c1_14	c1_38		1	0.449907	NaN	NA	c1_14	c1_2	c1_1	YES			YES									YES																							YES
TMEM50B	c1_2	c1_4	c1_9	c1_27	c1_55		2	0.771984	1	c1_55	c1_4	c1_2	c1_1	YES		YES					YES																		YES
LDLRAD4	c1_2	c1_5	c1_14	c1_38	c1_67		4	1.63612	0.854255	c1_67	c1_14	c1_2	c1_1	YES			YES									YES																							YES
TCF7L2	c1_2	c1_5	c1_13	c1_34	c1_60		3	1.46288	1	c1_60	c1_60	c1_2	c1_1	YES			YES								YES																					YES
LOC110483937	c1_2	c1_4	c1_11		3	1.24118	0.681129	c1_11	c1_4	c1_2	c1_1	YES		YES							YES
ATP6AP1	c1_3	c1_6	c1_17	c1_49		5	2.11276	0.611567	c1_49	c1_17	c1_17	c1_1		YES			YES											YES
ADAMTS6	c1_2	c1_5	c1_13		6	2.44903	0.376674	NA	NA	c1_2	c1_1	YES			YES								YES
LOC110476602	c1_3	c1_6	c1_15	c1_40		2	0.78772	1	c1_40	c1_40	c1_40	c1_1		YES			YES									YES
MAP9	c1_3	c1_7	c1_19	c1_50		2	0.842962	1	c1_50	c1_7	c1_7	c1_1		YES				YES												YES
HIKESHI	c1_2	c1_5	c1_14	c1_38	c1_67		2	0.892806	0	c1_67	c1_14	c1_2	c1_1	YES			YES									YES																							YES
HRH3	c1_3	c1_6	c1_15	c1_41		1	0.448467	NaN	c1_41	c1_41	c1_41	c1_1		YES			YES									YES
ZGPAT	c1_2	c1_5	c1_13	c1_35	c1_65		3	1.31446	0.683376	c1_65	c1_35	c1_2	c1_1	YES			YES								YES																						YES
VIM	c1_2	c1_4	c1_11		5	2.23905	0.400352	c1_11	c1_4	c1_2	c1_1	YES		YES							YES
LOC110480977	c1_2	c1_4	c1_9	c1_33		4	1.71347	0.163417	c1_33	c1_4	c1_2	c1_1	YES		YES					YES																								YES
METTL7A	c1_2	c1_5	c1_14	c1_38	c1_67		1	0.447593	NaN	c1_67	c1_14	c1_2	c1_1	YES			YES									YES																							YES
TANGO2	c1_2	c1_5	c1_13	c1_35	c1_65		2	0.780594	1	c1_65	c1_35	c1_2	c1_1	YES			YES								YES																						YES
RYR3	c1_3	c1_7	c1_20		5	2.25695	0.597898	c1_20	c1_7	c1_7	c1_1		YES				YES													YES
LOC116183242	c1_3	c1_8		3	1.15088	1	NA	c1_8	c1_8	c1_1		YES					YES
AP4S1	c1_3	c1_7	c1_19	c1_50		5	2.33585	0.613301	c1_50	c1_7	c1_7	c1_1		YES				YES												YES
TP53I11	c1_2	c1_5	c1_13	c1_37		3	1.18265	1	c1_37	c1_37	c1_2	c1_1	YES			YES								YES																							YES
TMEM200B	c1_2	c1_4	c1_10		3	0.51243	0	c1_10	c1_4	c1_2	c1_1	YES		YES						YES
SLC11A1	c1_3	c1_6	c1_15	c1_40		4	1.44552	0.695135	c1_40	c1_40	c1_40	c1_1		YES			YES									YES
LOC110481130	c1_3	c1_6	c1_15	c1_40		3	1.27933	0.320863	c1_40	c1_40	c1_40	c1_1		YES			YES									YES
PAK5	c1_3	c1_6	c1_15	c1_40		4	1.9112	0.835762	c1_40	c1_40	c1_40	c1_1		YES			YES									YES
MMD	c1_2	c1_4	c1_9	c1_27	c1_55		2	0.771137	1	c1_55	c1_4	c1_2	c1_1	YES		YES					YES																		YES
RNF126	c1_3	c1_6	c1_15	c1_40		3	1.1588	0.30781	c1_40	c1_40	c1_40	c1_1		YES			YES									YES
BBOX1	c1_3	c1_6	c1_15	c1_40		4	1.63732	0.173828	c1_40	c1_40	c1_40	c1_1		YES			YES									YES
BAZ2B	c1_3	c1_7	c1_19		3	1.21887	0.319642	NA	c1_7	c1_7	c1_1		YES				YES												YES
TRNAU1AP	c1_2	c1_5	c1_14	c1_38	c1_70		4	1.65937	0.333333	c1_70	c1_14	c1_2	c1_1	YES			YES									YES																							YES
MYO5B	c1_3	c1_6	c1_15	c1_41		2	0.884705	0	c1_41	c1_41	c1_41	c1_1		YES			YES									YES
KCNJ5	c1_2	c1_5	c1_14	c1_38	c1_67		3	1.18842	1	c1_67	c1_14	c1_2	c1_1	YES			YES									YES																							YES
DOK7	c1_2	c1_5	c1_14	c1_38	c1_67		2	0.993927	1	c1_67	c1_14	c1_2	c1_1	YES			YES									YES																							YES
MAP1LC3A	c1_3	c1_6	c1_15	c1_41		3	1.29925	0.328892	c1_41	c1_41	c1_41	c1_1		YES			YES									YES
PCYOX1	c1_2	c1_5	c1_13		6	2.49339	0.334408	NA	NA	c1_2	c1_1	YES			YES								YES
METRN	c1_2	c1_5	c1_13	c1_35	c1_66		1	0.444216	NaN	c1_66	c1_35	c1_2	c1_1	YES			YES								YES																						YES
CAPRIN2	c1_3	c1_6	c1_17	c1_47	c1_74		1	0.444065	NaN	c1_74	c1_17	c1_17	c1_1		YES			YES											YES
MAN1C1	c1_2	c1_5	c1_13	c1_34	c1_61		7	3.21866	0.50377	c1_61	c1_61	c1_2	c1_1	YES			YES								YES																					YES
LZTS1	c1_3	c1_8	c1_23		3	1.15111	0.692872	c1_23	c1_8	c1_8	c1_1		YES					YES															YES
ALKBH5	c1_2	c1_5	c1_14	c1_38	c1_67		4	1.7528	0.844722	c1_67	c1_14	c1_2	c1_1	YES			YES									YES																							YES
RGS2	c1_3	c1_8	c1_22		2	0.814856	0	c1_22	c1_8	c1_8	c1_1		YES					YES														YES
KLHL13	c1_3	c1_6	c1_15	c1_40		3	1.30471	1	c1_40	c1_40	c1_40	c1_1		YES			YES									YES
TMED3	c1_3	c1_6	c1_15	c1_40		3	0.534603	0	c1_40	c1_40	c1_40	c1_1		YES			YES									YES
AFTPH	c1_2	c1_5	c1_13		8	3.57013	0.407876	NA	NA	c1_2	c1_1	YES			YES								YES
BTBD10	c1_3	c1_6	c1_15	c1_40		2	0.87547	1	c1_40	c1_40	c1_40	c1_1		YES			YES									YES
LOC110471174	c1_3	c1_6	c1_16		3	1.25484	0.329881	c1_16	c1_16	c1_16	c1_1		YES			YES										YES
ITPR1	c1_3	c1_7	c1_19		3	1.30666	0.330368	NA	c1_7	c1_7	c1_1		YES				YES												YES
SLC35B4	c1_3	c1_6	c1_15	c1_40		1	0.443239	NaN	c1_40	c1_40	c1_40	c1_1		YES			YES									YES
CAVIN2	c1_3	c1_7	c1_19	c1_50		3	1.25838	0.324384	c1_50	c1_7	c1_7	c1_1		YES				YES												YES
BDNF	c1_2	c1_4	c1_10		5	2.08724	0.515563	c1_10	c1_4	c1_2	c1_1	YES		YES						YES
KLHL6	c1_3	c1_7	c1_20		6	2.73413	0.326869	c1_20	c1_7	c1_7	c1_1		YES				YES													YES
JAM2	c1_2	c1_4	c1_10		5	2.05291	0.187746	c1_10	c1_4	c1_2	c1_1	YES		YES						YES
HEG1	c1_3	c1_7	c1_19	c1_50		1	0.442032	NaN	c1_50	c1_7	c1_7	c1_1		YES				YES												YES
DIRAS2	c1_3	c1_8	c1_26		3	1.18736	0.313871	c1_26	c1_8	c1_8	c1_1		YES					YES																		YES
CTXN1	c1_2	c1_4	c1_9	c1_30		5	1.96969	0.276433	c1_30	c1_4	c1_2	c1_1	YES		YES					YES																					YES
SCRG1	c1_3	c1_6	c1_15	c1_40		4	1.75454	0.498755	c1_40	c1_40	c1_40	c1_1		YES			YES									YES
TMEM269	c1_3	c1_6	c1_15	c1_40		5	2.02421	0.298778	c1_40	c1_40	c1_40	c1_1		YES			YES									YES
PIANP	c1_3	c1_6	c1_15	c1_40		1	0.441824	NaN	c1_40	c1_40	c1_40	c1_1		YES			YES									YES
HDAC1	c1_3	c1_6	c1_15	c1_41		1	0.441737	NaN	c1_41	c1_41	c1_41	c1_1		YES			YES									YES
MYH9	c1_2	c1_5	c1_13	c1_34	c1_60		1	0.441	NaN	c1_60	c1_60	c1_2	c1_1	YES			YES								YES																					YES
PNKP	c1_3	c1_7	c1_19	c1_50		1	0.440916	NaN	c1_50	c1_7	c1_7	c1_1		YES				YES												YES
FBXO11	c1_3	c1_7	c1_19		1	0.440851	NaN	NA	c1_7	c1_7	c1_1		YES				YES												YES
RASSF1	c1_3	c1_6	c1_15	c1_40		3	1.16839	1	c1_40	c1_40	c1_40	c1_1		YES			YES									YES
LETM1	c1_3	c1_6	c1_15	c1_40		3	1.15981	0.333471	c1_40	c1_40	c1_40	c1_1		YES			YES									YES
RCOR1	c1_3	c1_6	c1_17	c1_49		4	1.71029	0.507487	c1_49	c1_17	c1_17	c1_1		YES			YES											YES
ABCB7	c1_2	c1_5	c1_13		4	1.52054	0.333333	NA	NA	c1_2	c1_1	YES			YES								YES
LRRC4C	c1_3	c1_8	c1_22		5	2.29972	0.408214	c1_22	c1_8	c1_8	c1_1		YES					YES														YES
SPATS2L	c1_2	c1_5	c1_14	c1_39		5	2.06358	0.1999	c1_39	c1_14	c1_2	c1_1	YES			YES									YES																								YES
SELENOH	c1_3	c1_6	c1_15	c1_46		3	1.2998	0.332994	c1_46	c1_46	c1_46	c1_1		YES			YES									YES
XRCC6	c1_2	c1_5	c1_13	c1_34	c1_60		2	0.762406	1	c1_60	c1_60	c1_2	c1_1	YES			YES								YES																					YES
FDX2	c1_3	c1_6	c1_15	c1_43		3	1.18848	1	c1_43	c1_43	c1_43	c1_1		YES			YES									YES
LOC110480017	c1_3	c1_6	c1_15	c1_44		2	0.858254	0	c1_44	c1_44	c1_44	c1_1		YES			YES									YES
SDAD1	c1_2	c1_4	c1_9	c1_28		2	0.773731	1	c1_28	c1_4	c1_2	c1_1	YES		YES					YES																			YES
LMAN1	c1_2	c1_4	c1_11		3	1.19791	0.683205	c1_11	c1_4	c1_2	c1_1	YES		YES							YES
POLR1B	c1_2	c1_5	c1_14	c1_38	c1_67		3	1.20945	0.644145	c1_67	c1_14	c1_2	c1_1	YES			YES									YES																							YES
PLK2	c1_3	c1_6	c1_17	c1_47	c1_74		3	1.19532	0.68358	c1_74	c1_17	c1_17	c1_1		YES			YES											YES
LOC110479139	c1_3	c1_6	c1_15	c1_45		2	0.851839	0	c1_45	c1_45	c1_45	c1_1		YES			YES									YES
ST7L	c1_2	c1_4	c1_10		3	1.22209	0.338267	c1_10	c1_4	c1_2	c1_1	YES		YES						YES
ABCA1	c1_2	c1_5	c1_13		3	1.19729	0	NA	NA	c1_2	c1_1	YES			YES								YES
LOC110482333	c1_2	c1_4	c1_9	c1_27	c1_55		2	0.841448	1	c1_55	c1_4	c1_2	c1_1	YES		YES					YES																		YES
RIT2	c1_3	c1_6	c1_16		1	0.43808	NaN	c1_16	c1_16	c1_16	c1_1		YES			YES										YES
SELENOW	c1_3	c1_6	c1_15	c1_40		2	0.767123	1	c1_40	c1_40	c1_40	c1_1		YES			YES									YES
LOC110482849	c1_3	c1_6	c1_15		1	0.437863	NaN	NA	NA	NA	c1_1		YES			YES									YES
ERMN	c1_2	c1_5	c1_13	c1_34	c1_60		1	0.437357	NaN	c1_60	c1_60	c1_2	c1_1	YES			YES								YES																					YES
PIGG	c1_2	c1_4	c1_10		3	1.2796	0.335257	c1_10	c1_4	c1_2	c1_1	YES		YES						YES
MLC1	c1_2	c1_5	c1_13	c1_35	c1_65		4	1.61462	0.33562	c1_65	c1_35	c1_2	c1_1	YES			YES								YES																						YES
ITGB5	c1_2	c1_5	c1_14	c1_38	c1_70		2	0.846282	1	c1_70	c1_14	c1_2	c1_1	YES			YES									YES																							YES
ZDHHC23	c1_2	c1_4	c1_9	c1_28		3	1.2664	1	c1_28	c1_4	c1_2	c1_1	YES		YES					YES																			YES
KIF3C	c1_3	c1_6	c1_17	c1_49		2	0.811793	0	c1_49	c1_17	c1_17	c1_1		YES			YES											YES
TRMT10B	c1_3	c1_6	c1_15	c1_40		3	0.592129	0	c1_40	c1_40	c1_40	c1_1		YES			YES									YES
LOC110475037	c1_3	c1_6	c1_15	c1_41		3	1.21033	1	c1_41	c1_41	c1_41	c1_1		YES			YES									YES
LOC110474204	c1_3	c1_6	c1_15	c1_40		3	1.11	1	c1_40	c1_40	c1_40	c1_1		YES			YES									YES
CCDC181	c1_3	c1_7	c1_19	c1_50		4	1.69418	0.674267	c1_50	c1_7	c1_7	c1_1		YES				YES												YES
SPICE1	c1_2	c1_5	c1_14	c1_38	c1_67		3	1.19651	0.317498	c1_67	c1_14	c1_2	c1_1	YES			YES									YES																							YES
FERMT2	c1_3	c1_6	c1_15	c1_40		4	1.63394	0.183745	c1_40	c1_40	c1_40	c1_1		YES			YES									YES
DEF8	c1_3	c1_6	c1_15	c1_40		3	1.26369	0.327242	c1_40	c1_40	c1_40	c1_1		YES			YES									YES
SLC25A32	c1_3	c1_6	c1_15	c1_40		1	0.436371	NaN	c1_40	c1_40	c1_40	c1_1		YES			YES									YES
LOC110481563	c1_3	c1_6	c1_15	c1_41		2	0.783848	1	c1_41	c1_41	c1_41	c1_1		YES			YES									YES
CZH5orf63	c1_2	c1_5	c1_13	c1_35	c1_65		1	0.43577	NaN	c1_65	c1_35	c1_2	c1_1	YES			YES								YES																						YES
FDPS	c1_3	c1_7	c1_19	c1_50		2	0.768745	1	c1_50	c1_7	c1_7	c1_1		YES				YES												YES
PAPSS1	c1_2	c1_4	c1_9	c1_27	c1_58		4	1.63522	0	c1_58	c1_4	c1_2	c1_1	YES		YES					YES																		YES
LOC110481921	c1_3	c1_6	c1_15	c1_40		3	1.38865	1	c1_40	c1_40	c1_40	c1_1		YES			YES									YES
PPP3CC	c1_3	c1_6	c1_15	c1_41		1	0.434709	NaN	c1_41	c1_41	c1_41	c1_1		YES			YES									YES
GJE1	c1_3	c1_6		2	0.760158	1	NA	NA	NA	c1_1		YES			YES
MAGI3	c1_2	c1_5	c1_13	c1_34		3	1.14502	0.337453	NA	NA	c1_2	c1_1	YES			YES								YES																					YES
LRRC40	c1_3	c1_6	c1_15	c1_41		1	0.434521	NaN	c1_41	c1_41	c1_41	c1_1		YES			YES									YES
DRD3	c1_2	c1_5	c1_13	c1_34		1	0.434439	NaN	NA	NA	c1_2	c1_1	YES			YES								YES																					YES
LOC110473442	c1_3	c1_6	c1_15	c1_46		1	0.434146	NaN	c1_46	c1_46	c1_46	c1_1		YES			YES									YES
TRIB2	c1_2	c1_5	c1_14	c1_38	c1_67		5	2.72643	0.704675	c1_67	c1_14	c1_2	c1_1	YES			YES									YES																							YES
PDE4D	c1_2	c1_4	c1_9	c1_32		2	0.756499	1	c1_32	c1_4	c1_2	c1_1	YES		YES					YES																							YES
SAP30	c1_2	c1_4	c1_9		1	0.433677	NaN	NA	c1_4	c1_2	c1_1	YES		YES					YES
ARHGEF28	c1_3	c1_7	c1_19	c1_50		6	2.4242	0.481242	c1_50	c1_7	c1_7	c1_1		YES				YES												YES
TAF4	c1_2	c1_5	c1_14	c1_39		1	0.433301	NaN	c1_39	c1_14	c1_2	c1_1	YES			YES									YES																								YES
LOC110470965	c1_3	c1_6	c1_15	c1_40		4	1.57761	0.48362	c1_40	c1_40	c1_40	c1_1		YES			YES									YES
CD63	c1_3	c1_8	c1_23		3	1.23489	1	c1_23	c1_8	c1_8	c1_1		YES					YES															YES
PGAP2	c1_2	c1_5	c1_13	c1_35	c1_65		2	0.827021	0	c1_65	c1_35	c1_2	c1_1	YES			YES								YES																						YES
LOC110475348	c1_2	c1_4		3	1.15836	0.326034	NA	c1_4	c1_2	c1_1	YES		YES
LONRF2	c1_3	c1_7	c1_20		3	1.11177	1	c1_20	c1_7	c1_7	c1_1		YES				YES													YES
PHOSPHO2	c1_2	c1_4	c1_10		1	0.43251	NaN	c1_10	c1_4	c1_2	c1_1	YES		YES						YES
DNALI1	c1_2	c1_5	c1_14	c1_38	c1_67		1	0.432471	NaN	c1_67	c1_14	c1_2	c1_1	YES			YES									YES																							YES
LOC110468077	c1_3	c1_6	c1_15	c1_40		5	2.03707	0.291978	c1_40	c1_40	c1_40	c1_1		YES			YES									YES
TPBG	c1_3	c1_6	c1_15	c1_40		2	0.861033	0	c1_40	c1_40	c1_40	c1_1		YES			YES									YES
SLC30A5	c1_3	c1_6	c1_17	c1_49		4	1.59482	0.34622	c1_49	c1_17	c1_17	c1_1		YES			YES											YES
nbis-pseudo25	c1_2	c1_4	c1_9	c1_27	c1_57		2	0.754531	1	c1_57	c1_4	c1_2	c1_1	YES		YES					YES																		YES
LOC110467910	c1_2	c1_5	c1_13	c1_35	c1_65		3	1.27651	0	c1_65	c1_35	c1_2	c1_1	YES			YES								YES																						YES
ATP6V1A	c1_3	c1_6	c1_16		2	0.89695	1	c1_16	c1_16	c1_16	c1_1		YES			YES										YES
SGSM1	c1_3	c1_6	c1_15	c1_40		3	1.14974	0	c1_40	c1_40	c1_40	c1_1		YES			YES									YES
SAP30BP	c1_3	c1_7	c1_19	c1_50		2	0.850542	0	c1_50	c1_7	c1_7	c1_1		YES				YES												YES
GPR52	c1_2	c1_4	c1_12		3	1.27343	0.330943	c1_12	c1_4	c1_2	c1_1	YES		YES								YES
RADX	c1_3	c1_8	c1_22		1	0.430365	NaN	c1_22	c1_8	c1_8	c1_1		YES					YES														YES
UVSSA	c1_2	c1_5	c1_13		2	0.845969	1	NA	NA	c1_2	c1_1	YES			YES								YES
LOC116184685	c1_3	c1_6	c1_15	c1_40		2	0.867853	1	c1_40	c1_40	c1_40	c1_1		YES			YES									YES
LOC116184402	c1_3	c1_7	c1_19		2	0.755345	1	NA	c1_7	c1_7	c1_1		YES				YES												YES
DHX35	c1_3	c1_6	c1_17	c1_49		3	1.2099	0.352424	c1_49	c1_17	c1_17	c1_1		YES			YES											YES
HTATIP2	c1_3	c1_6	c1_17	c1_47	c1_74		1	0.429145	NaN	c1_74	c1_17	c1_17	c1_1		YES			YES											YES
SPINK2	c1_3	c1_6	c1_15	c1_40		2	0.842955	1	c1_40	c1_40	c1_40	c1_1		YES			YES									YES
ZFC3H1	c1_2	c1_4	c1_9	c1_27	c1_56	c1_78		2	0.768818	1	c1_78	c1_4	c1_2	c1_1	YES		YES					YES																		YES
ABHD14B	c1_3	c1_6	c1_15	c1_40		1	0.42869	NaN	c1_40	c1_40	c1_40	c1_1		YES			YES									YES
RPS9	c1_3	c1_6	c1_15	c1_41		2	0.845084	0	c1_41	c1_41	c1_41	c1_1		YES			YES									YES
WDR35	c1_2	c1_5	c1_13		1	0.428506	NaN	NA	NA	c1_2	c1_1	YES			YES								YES
CA10	c1_3	c1_7	c1_19	c1_50		2	0.781775	1	c1_50	c1_7	c1_7	c1_1		YES				YES												YES
PLAC8	c1_3	c1_6	c1_15	c1_40		6	2.61688	0.485581	c1_40	c1_40	c1_40	c1_1		YES			YES									YES
SMPDL3B	c1_2	c1_4		2	0.81398	0	NA	c1_4	c1_2	c1_1	YES		YES
CSMD1	c1_3	c1_7	c1_20		2	0.764816	1	c1_20	c1_7	c1_7	c1_1		YES				YES													YES
CHD3	c1_2	c1_5	c1_14	c1_38	c1_67		2	0.812652	0	c1_67	c1_14	c1_2	c1_1	YES			YES									YES																							YES
IER3IP1	c1_3	c1_6	c1_15	c1_41		3	1.20321	1	c1_41	c1_41	c1_41	c1_1		YES			YES									YES
LOC110475834	c1_3	c1_6	c1_16		1	0.427335	NaN	c1_16	c1_16	c1_16	c1_1		YES			YES										YES
ZBTB8OS	c1_3	c1_6	c1_15	c1_41		1	0.426746	NaN	c1_41	c1_41	c1_41	c1_1		YES			YES									YES
CUEDC1	c1_2	c1_5	c1_13	c1_34	c1_60		3	1.1352	1	c1_60	c1_60	c1_2	c1_1	YES			YES								YES																					YES
ZDHHC8	c1_2	c1_5	c1_13	c1_35	c1_65		5	2.02392	0.506221	c1_65	c1_35	c1_2	c1_1	YES			YES								YES																						YES
SEC22B	c1_2	c1_5	c1_13	c1_35	c1_65		3	1.19971	1	c1_65	c1_35	c1_2	c1_1	YES			YES								YES																						YES
SRSF4	c1_2	c1_5	c1_13	c1_34	c1_64	c1_64	3	1.16675	0.339455	c1_64	c1_64	c1_2	c1_1	YES			YES								YES																					YES
UROD	c1_3	c1_7	c1_19	c1_50		2	0.84635	1	c1_50	c1_7	c1_7	c1_1		YES				YES												YES
ANOS1	c1_3	c1_6	c1_16		2	0.790423	1	c1_16	c1_16	c1_16	c1_1		YES			YES										YES
CHRM2	c1_3	c1_7	c1_19	c1_50		4	1.8883	0.483465	c1_50	c1_7	c1_7	c1_1		YES				YES												YES
LOC110480661	c1_3	c1_6	c1_15	c1_46		3	1.33748	0.633037	c1_46	c1_46	c1_46	c1_1		YES			YES									YES
LOC110470382	c1_2	c1_5	c1_14	c1_38	c1_71		3	1.21537	0.324745	c1_71	c1_14	c1_2	c1_1	YES			YES									YES																							YES
NKX2-1	c1_3	c1_6	c1_15	c1_43		3	1.28829	0	c1_43	c1_43	c1_43	c1_1		YES			YES									YES
NPTXR	c1_3	c1_6	c1_15	c1_40		4	1.49455	0.835878	c1_40	c1_40	c1_40	c1_1		YES			YES									YES
SURF4	c1_3	c1_6	c1_15	c1_40		1	0.425863	NaN	c1_40	c1_40	c1_40	c1_1		YES			YES									YES
CKAP4	c1_3	c1_6	c1_15	c1_40		2	0.816209	0	c1_40	c1_40	c1_40	c1_1		YES			YES									YES
SLC24A4	c1_2	c1_5	c1_14	c1_39		3	1.24858	0.70084	c1_39	c1_14	c1_2	c1_1	YES			YES									YES																								YES
SHISAL1	c1_3	c1_6	c1_17	c1_47	c1_74		3	1.18344	1	c1_74	c1_17	c1_17	c1_1		YES			YES											YES
NTAN1	c1_2	c1_4	c1_9	c1_27	c1_57		6	2.39731	0.408595	c1_57	c1_4	c1_2	c1_1	YES		YES					YES																		YES
ASL	c1_3	c1_6	c1_16		4	1.67558	0.333333	c1_16	c1_16	c1_16	c1_1		YES			YES										YES
MFSD12	c1_3	c1_6	c1_15	c1_40		2	0.787936	1	c1_40	c1_40	c1_40	c1_1		YES			YES									YES
MEGF11	c1_2	c1_4	c1_10		6	2.57962	0.279519	c1_10	c1_4	c1_2	c1_1	YES		YES						YES
ECH1	c1_3	c1_6	c1_15	c1_45		1	0.424464	NaN	c1_45	c1_45	c1_45	c1_1		YES			YES									YES
AIFM2	c1_2	c1_5	c1_13	c1_35	c1_65		1	0.424346	NaN	c1_65	c1_35	c1_2	c1_1	YES			YES								YES																						YES
L2HGDH	c1_2	c1_4	c1_9	c1_27	c1_57		1	0.424337	NaN	c1_57	c1_4	c1_2	c1_1	YES		YES					YES																		YES
PTPRO	c1_3	c1_6	c1_16		2	0.780421	0	c1_16	c1_16	c1_16	c1_1		YES			YES										YES
AKAP1	c1_2	c1_5	c1_14	c1_38	c1_67		5	2.16602	0.199304	c1_67	c1_14	c1_2	c1_1	YES			YES									YES																							YES
EML6	c1_3	c1_6	c1_16		3	1.32875	0	c1_16	c1_16	c1_16	c1_1		YES			YES										YES
RGS10	c1_3	c1_6	c1_15	c1_40		1	0.424016	NaN	c1_40	c1_40	c1_40	c1_1		YES			YES									YES
PTPN1	c1_3	c1_7	c1_19	c1_50		2	0.751225	1	c1_50	c1_7	c1_7	c1_1		YES				YES												YES
LOC110475792	c1_3	c1_6	c1_15	c1_42		4	1.80594	0.510291	NA	c1_42	c1_42	c1_1		YES			YES									YES
CHP1	c1_3	c1_6	c1_17	c1_49		3	1.17924	0.3204	c1_49	c1_17	c1_17	c1_1		YES			YES											YES
GXYLT2	c1_3	c1_6	c1_16		1	0.423464	NaN	c1_16	c1_16	c1_16	c1_1		YES			YES										YES
SNX3	c1_3	c1_6	c1_15	c1_40		5	2.22157	0.708823	c1_40	c1_40	c1_40	c1_1		YES			YES									YES
PIK3IP1	c1_3	c1_6	c1_15	c1_42	c1_73		1	0.423451	NaN	c1_73	c1_42	c1_42	c1_1		YES			YES									YES
LOC116183248	c1_2	c1_5	c1_13		2	0.79282	0	NA	NA	c1_2	c1_1	YES			YES								YES
SYNE3	c1_3	c1_7	c1_19	c1_50		1	0.423181	NaN	c1_50	c1_7	c1_7	c1_1		YES				YES												YES
EPHX2	c1_2	c1_5	c1_13	c1_34	c1_60		4	1.69321	0.654159	c1_60	c1_60	c1_2	c1_1	YES			YES								YES																					YES
PXN	c1_3	c1_6	c1_16		1	0.423077	NaN	c1_16	c1_16	c1_16	c1_1		YES			YES										YES
MMD2	c1_3	c1_6	c1_17	c1_47	c1_75		1	0.422767	NaN	c1_75	c1_17	c1_17	c1_1		YES			YES											YES
CNMD	c1_3	c1_6	c1_17	c1_47	c1_74		4	1.70539	0.485418	c1_74	c1_17	c1_17	c1_1		YES			YES											YES
DCN	c1_2	c1_4		1	0.421984	NaN	NA	c1_4	c1_2	c1_1	YES		YES
JMJD8	c1_3	c1_6	c1_15	c1_40		1	0.421894	NaN	c1_40	c1_40	c1_40	c1_1		YES			YES									YES
LOC110482585	c1_2	c1_5	c1_14	c1_38	c1_67		5	2.01335	0.198019	c1_67	c1_14	c1_2	c1_1	YES			YES									YES																							YES
OTUD4	c1_2	c1_5	c1_14	c1_38		1	0.421766	NaN	NA	c1_14	c1_2	c1_1	YES			YES									YES																							YES
NPY5R	c1_3	c1_7	c1_19		1	0.421662	NaN	NA	c1_7	c1_7	c1_1		YES				YES												YES
ALCAM	c1_2	c1_5	c1_13	c1_34	c1_61		1	0.421558	NaN	c1_61	c1_61	c1_2	c1_1	YES			YES								YES																					YES
KCNK3	c1_3	c1_6	c1_15	c1_40		1	0.421424	NaN	c1_40	c1_40	c1_40	c1_1		YES			YES									YES
INHBB	c1_2	c1_4	c1_10		2	0.821456	0	c1_10	c1_4	c1_2	c1_1	YES		YES						YES
AIG1	c1_2	c1_5	c1_14	c1_38	c1_67		2	0.803324	0	c1_67	c1_14	c1_2	c1_1	YES			YES									YES																							YES
B9D2	c1_3	c1_7	c1_19	c1_50		2	0.971145	0	c1_50	c1_7	c1_7	c1_1		YES				YES												YES
ARID3A	c1_3	c1_6	c1_15	c1_40		3	1.28539	0	c1_40	c1_40	c1_40	c1_1		YES			YES									YES
HPCAL4	c1_3	c1_8		3	1.19599	0.336592	NA	c1_8	c1_8	c1_1		YES					YES
GMCL1	c1_2	c1_4		4	1.64153	0.333333	NA	c1_4	c1_2	c1_1	YES		YES
CTSB	c1_2	c1_5	c1_13	c1_35	c1_65		4	2.53596	0.815897	c1_65	c1_35	c1_2	c1_1	YES			YES								YES																						YES
SPPL2B	c1_3	c1_7	c1_19	c1_50		1	0.41997	NaN	c1_50	c1_7	c1_7	c1_1		YES				YES												YES
MYOC	c1_2	c1_5	c1_13	c1_35	c1_66		2	0.873652	1	c1_66	c1_35	c1_2	c1_1	YES			YES								YES																						YES
PCSK2	c1_2	c1_4	c1_9	c1_27	c1_56	c1_79		3	1.51723	0.36173	c1_79	c1_4	c1_2	c1_1	YES		YES					YES																		YES
BRCC3	c1_3	c1_6	c1_15	c1_43		1	0.41927	NaN	c1_43	c1_43	c1_43	c1_1		YES			YES									YES
PCIF1	c1_3	c1_6	c1_15	c1_40		4	1.67121	0.33201	c1_40	c1_40	c1_40	c1_1		YES			YES									YES
LOC110467630	c1_2	c1_5	c1_13	c1_34	c1_60		1	0.41922	NaN	c1_60	c1_60	c1_2	c1_1	YES			YES								YES																					YES
MSN	c1_2	c1_5	c1_14	c1_38	c1_67		4	1.65543	0.336327	c1_67	c1_14	c1_2	c1_1	YES			YES									YES																							YES
NKX2-2	c1_3	c1_7	c1_19		2	0.778257	1	NA	c1_7	c1_7	c1_1		YES				YES												YES
MIEF2	c1_2	c1_5	c1_14	c1_38		1	0.418623	NaN	NA	c1_14	c1_2	c1_1	YES			YES									YES																							YES
DCBLD1	c1_3	c1_7	c1_19	c1_50		2	0.821018	0	c1_50	c1_7	c1_7	c1_1		YES				YES												YES
POLD2	c1_2	c1_5	c1_13	c1_35	c1_65		1	0.418088	NaN	c1_65	c1_35	c1_2	c1_1	YES			YES								YES																						YES
TFG	c1_3	c1_6	c1_17	c1_49		1	0.417982	NaN	c1_49	c1_17	c1_17	c1_1		YES			YES											YES
SLC40A1	c1_2	c1_4	c1_9	c1_27	c1_52		4	1.55215	0.672003	c1_52	c1_4	c1_2	c1_1	YES		YES					YES																		YES
LOC110474841	c1_3	c1_6	c1_15	c1_40		1	0.417788	NaN	c1_40	c1_40	c1_40	c1_1		YES			YES									YES
CLYBL	c1_3	c1_6	c1_15	c1_41		1	0.417597	NaN	c1_41	c1_41	c1_41	c1_1		YES			YES									YES
INTS6	c1_3	c1_8	c1_23		2	0.816483	1	c1_23	c1_8	c1_8	c1_1		YES					YES															YES
SLC4A3	c1_3	c1_7	c1_19		4	1.51082	0.334847	NA	c1_7	c1_7	c1_1		YES				YES												YES
SLC25A16	c1_2	c1_5	c1_13		5	1.99584	0.103017	NA	NA	c1_2	c1_1	YES			YES								YES
RAB20	c1_3	c1_6	c1_15	c1_40		2	0.746408	1	c1_40	c1_40	c1_40	c1_1		YES			YES									YES
LOC110472637	c1_3	c1_6	c1_15	c1_40		4	1.64802	0	c1_40	c1_40	c1_40	c1_1		YES			YES									YES
LOC110469041	c1_2	c1_5	c1_13	c1_34		1	0.416619	NaN	NA	NA	c1_2	c1_1	YES			YES								YES																					YES
CNN3	c1_3	c1_6	c1_15	c1_40		1	0.416348	NaN	c1_40	c1_40	c1_40	c1_1		YES			YES									YES
KLF15	c1_2	c1_5	c1_13	c1_35	c1_65		2	0.829376	1	c1_65	c1_35	c1_2	c1_1	YES			YES								YES																						YES
LEF1	c1_2	c1_5	c1_14	c1_39		4	1.49415	0.176198	c1_39	c1_14	c1_2	c1_1	YES			YES									YES																								YES
LOC110475166	c1_2	c1_4	c1_9	c1_27	c1_52		5	2.20308	0.50225	c1_52	c1_4	c1_2	c1_1	YES		YES					YES																		YES
PPM1F	c1_2	c1_4	c1_9	c1_27	c1_59		1	0.415174	NaN	c1_59	c1_4	c1_2	c1_1	YES		YES					YES																		YES
CALD1	c1_2	c1_5	c1_14	c1_38	c1_69		3	1.25576	1	c1_69	c1_14	c1_2	c1_1	YES			YES									YES																							YES
ARHGAP19	c1_2	c1_5	c1_13	c1_35	c1_66		5	2.30437	0.108426	c1_66	c1_35	c1_2	c1_1	YES			YES								YES																						YES
SEC24C	c1_2	c1_4	c1_9	c1_27	c1_54		5	2.23133	0.301611	c1_54	c1_4	c1_2	c1_1	YES		YES					YES																		YES
UPF2	c1_2	c1_5	c1_13	c1_34		1	0.414801	NaN	NA	NA	c1_2	c1_1	YES			YES								YES																					YES
BMS1	c1_2	c1_5	c1_14	c1_38	c1_67		6	2.54198	0.566014	c1_67	c1_14	c1_2	c1_1	YES			YES									YES																							YES
MXI1	c1_2	c1_5	c1_14	c1_39		6	2.4824	0.265922	c1_39	c1_14	c1_2	c1_1	YES			YES									YES																								YES
SPOUT1	c1_3	c1_6	c1_15	c1_40		2	0.801062	1	c1_40	c1_40	c1_40	c1_1		YES			YES									YES
CENPI	c1_3	c1_6	c1_16		1	0.414489	NaN	c1_16	c1_16	c1_16	c1_1		YES			YES										YES
SPATA2	c1_2	c1_5	c1_13	c1_34	c1_60		1	0.414426	NaN	c1_60	c1_60	c1_2	c1_1	YES			YES								YES																					YES
CELF4	c1_2	c1_5	c1_13	c1_35	c1_66		2	0.768461	1	c1_66	c1_35	c1_2	c1_1	YES			YES								YES																						YES
LOC116184729	c1_2	c1_5	c1_13	c1_34	c1_60		1	0.413857	NaN	c1_60	c1_60	c1_2	c1_1	YES			YES								YES																					YES
LOC110472217	c1_3	c1_6	c1_17	c1_49		1	0.413781	NaN	c1_49	c1_17	c1_17	c1_1		YES			YES											YES
LOC110475882	c1_3	c1_6	c1_15	c1_40		4	1.7878	0.345914	c1_40	c1_40	c1_40	c1_1		YES			YES									YES
SEPSECS	c1_2	c1_5	c1_14	c1_38	c1_71		1	0.412459	NaN	c1_71	c1_14	c1_2	c1_1	YES			YES									YES																							YES
BMT2	c1_2	c1_5	c1_13	c1_34		3	1.30984	1	NA	NA	c1_2	c1_1	YES			YES								YES																					YES
LOC110474320	c1_2	c1_5	c1_13	c1_35	c1_66		3	1.20059	0	c1_66	c1_35	c1_2	c1_1	YES			YES								YES																						YES
TMEM50A	c1_3	c1_6	c1_15	c1_43		3	1.29645	1	c1_43	c1_43	c1_43	c1_1		YES			YES									YES
ALG5	c1_3	c1_6	c1_15	c1_40		1	0.410592	NaN	c1_40	c1_40	c1_40	c1_1		YES			YES									YES
LOC116184210	c1_3	c1_6	c1_15	c1_45		2	0.739584	1	c1_45	c1_45	c1_45	c1_1		YES			YES									YES
ADAP1	c1_3	c1_6	c1_15	c1_40		4	1.69339	0.527218	c1_40	c1_40	c1_40	c1_1		YES			YES									YES
CALB2	c1_3	c1_6	c1_15	c1_41		2	0.736265	1	c1_41	c1_41	c1_41	c1_1		YES			YES									YES
NAA30	c1_3	c1_6	c1_17	c1_47	c1_76		2	0.754423	1	c1_76	c1_17	c1_17	c1_1		YES			YES											YES
SOD3	c1_3	c1_6	c1_15	c1_42	c1_72		3	1.2394	1	c1_72	c1_42	c1_42	c1_1		YES			YES									YES
ING5	c1_3	c1_7	c1_19	c1_50		9	4.45526	0.349032	c1_50	c1_7	c1_7	c1_1		YES				YES												YES
SETD9	c1_3	c1_6	c1_15	c1_41		1	0.410136	NaN	c1_41	c1_41	c1_41	c1_1		YES			YES									YES
LOC110483779	c1_3	c1_6	c1_16		1	0.409558	NaN	c1_16	c1_16	c1_16	c1_1		YES			YES										YES
TTC28	c1_2	c1_4	c1_10		1	0.40955	NaN	c1_10	c1_4	c1_2	c1_1	YES		YES						YES
DDX56	c1_3	c1_7	c1_20		2	0.735526	0	c1_20	c1_7	c1_7	c1_1		YES				YES													YES
BUD23	c1_3	c1_6	c1_17	c1_47	c1_77		2	0.737942	1	c1_77	c1_17	c1_17	c1_1		YES			YES											YES
ITPKA	c1_3	c1_8	c1_22		4	1.60551	0.638243	c1_22	c1_8	c1_8	c1_1		YES					YES														YES
CDK10	c1_2	c1_5	c1_14	c1_38	c1_67		2	0.829945	0	c1_67	c1_14	c1_2	c1_1	YES			YES									YES																							YES
LOC110484356	c1_2	c1_5	c1_13		2	0.752568	0	NA	NA	c1_2	c1_1	YES			YES								YES
GDA	c1_2	c1_4	c1_9	c1_27	c1_53		2	0.731004	1	c1_53	c1_4	c1_2	c1_1	YES		YES					YES																		YES
LOC110477349	c1_3	c1_6	c1_15	c1_44		4	1.60839	0	c1_44	c1_44	c1_44	c1_1		YES			YES									YES
RCHY1	c1_3	c1_6	c1_15	c1_42		1	0.408281	NaN	NA	c1_42	c1_42	c1_1		YES			YES									YES
DIS3	c1_2	c1_5	c1_14	c1_38		1	0.408275	NaN	NA	c1_14	c1_2	c1_1	YES			YES									YES																							YES
LOC110473332	c1_2	c1_5	c1_13	c1_37		1	0.408193	NaN	c1_37	c1_37	c1_2	c1_1	YES			YES								YES																							YES
DPH5	c1_2	c1_5	c1_14	c1_39		3	1.15606	0.323685	c1_39	c1_14	c1_2	c1_1	YES			YES									YES																								YES
NINJ2	c1_3	c1_7	c1_21		3	1.20972	0.331663	c1_21	c1_7	c1_7	c1_1		YES				YES														YES
NUDT12	c1_3	c1_6	c1_17	c1_49		1	0.40667	NaN	c1_49	c1_17	c1_17	c1_1		YES			YES											YES
SIDT2	c1_2	c1_4	c1_9	c1_33		2	0.853932	0	c1_33	c1_4	c1_2	c1_1	YES		YES					YES																								YES
DES	c1_3	c1_6	c1_15	c1_40		1	0.406043	NaN	c1_40	c1_40	c1_40	c1_1		YES			YES									YES
COL5A1	c1_3	c1_6	c1_15	c1_40		1	0.405806	NaN	c1_40	c1_40	c1_40	c1_1		YES			YES									YES
SAPCD2	c1_2	c1_5	c1_13		1	0.40569	NaN	NA	NA	c1_2	c1_1	YES			YES								YES
ZNF536	c1_3	c1_6	c1_15	c1_41		1	0.405652	NaN	c1_41	c1_41	c1_41	c1_1		YES			YES									YES
SUV39H1	c1_2	c1_5	c1_13	c1_34	c1_60		1	0.405541	NaN	c1_60	c1_60	c1_2	c1_1	YES			YES								YES																					YES
TRPM2	c1_3	c1_6	c1_15	c1_40		7	3.03146	0.359147	c1_40	c1_40	c1_40	c1_1		YES			YES									YES
CIAO3	c1_3	c1_6	c1_16		1	0.404879	NaN	c1_16	c1_16	c1_16	c1_1		YES			YES										YES
HELZ	c1_2	c1_5	c1_13	c1_34		1	0.404874	NaN	NA	NA	c1_2	c1_1	YES			YES								YES																					YES
NPTX2	c1_2	c1_4	c1_10		3	1.06032	1	c1_10	c1_4	c1_2	c1_1	YES		YES						YES
CELF5	c1_2	c1_5	c1_13	c1_34	c1_61		5	2.04832	0.619653	c1_61	c1_61	c1_2	c1_1	YES			YES								YES																					YES
LOC110478144	c1_3	c1_8	c1_25		1	0.40424	NaN	c1_25	c1_8	c1_8	c1_1		YES					YES																	YES
GSDME	c1_2	c1_5	c1_13	c1_37		5	2.05198	0.314841	c1_37	c1_37	c1_2	c1_1	YES			YES								YES																							YES
LOC110469590	c1_2	c1_5	c1_13		3	1.09075	0.347403	NA	NA	c1_2	c1_1	YES			YES								YES
KCNQ5	c1_3	c1_8	c1_22		2	0.755913	1	c1_22	c1_8	c1_8	c1_1		YES					YES														YES
TAC1	c1_3	c1_8	c1_22	c1_1	c1_3	c1_8	c1_22	17	7.54342	0.19212	c1_22	c1_8	c1_8	c1_1		YES					YES														YES
LOC110470335	c1_3	c1_6	c1_15	c1_40		1	0.403414	NaN	c1_40	c1_40	c1_40	c1_1		YES			YES									YES
ANKRD12	c1_3	c1_7	c1_19	c1_50		3	1.36195	1	c1_50	c1_7	c1_7	c1_1		YES				YES												YES
UBIAD1	c1_3	c1_7	c1_19	c1_51		1	0.403151	NaN	c1_51	c1_7	c1_7	c1_1		YES				YES												YES
PLPP7	c1_2	c1_5	c1_13	c1_35	c1_65		1	0.403089	NaN	c1_65	c1_35	c1_2	c1_1	YES			YES								YES																						YES
EPS15	c1_2	c1_5	c1_13	c1_35	c1_65		4	1.64795	0.83511	c1_65	c1_35	c1_2	c1_1	YES			YES								YES																						YES
GM2A	c1_2	c1_4	c1_9	c1_27	c1_56	c1_78		3	1.34113	1	c1_78	c1_4	c1_2	c1_1	YES		YES					YES																		YES
RAB37	c1_3	c1_6	c1_15	c1_46		2	0.74803	1	c1_46	c1_46	c1_46	c1_1		YES			YES									YES
GNAL	c1_3	c1_7	c1_19	c1_50		3	1.18069	0	c1_50	c1_7	c1_7	c1_1		YES				YES												YES
ERCC4	c1_3	c1_6	c1_16		1	0.401748	NaN	c1_16	c1_16	c1_16	c1_1		YES			YES										YES
UFC1	c1_3	c1_6	c1_15	c1_40		6	3.35766	0.522752	c1_40	c1_40	c1_40	c1_1		YES			YES									YES
DUSP12	c1_2	c1_4	c1_9	c1_27	c1_56	c1_79		2	0.739685	1	c1_79	c1_4	c1_2	c1_1	YES		YES					YES																		YES
GAL3ST1	c1_3	c1_6	c1_16		2	0.84534	0	c1_16	c1_16	c1_16	c1_1		YES			YES										YES
MNS1	c1_3	c1_7	c1_19	c1_50		3	1.19537	1	c1_50	c1_7	c1_7	c1_1		YES				YES												YES
HMGCLL1	c1_2	c1_5	c1_14	c1_39		3	1.13161	0.342302	c1_39	c1_14	c1_2	c1_1	YES			YES									YES																								YES
VGLL3	c1_2	c1_4	c1_9	c1_30		3	1.21337	0.319215	c1_30	c1_4	c1_2	c1_1	YES		YES					YES																					YES
RCAN3	c1_2	c1_4	c1_10		2	0.821414	1	c1_10	c1_4	c1_2	c1_1	YES		YES						YES
C1H21orf91	c1_3	c1_7	c1_19	c1_50		1	0.400604	NaN	c1_50	c1_7	c1_7	c1_1		YES				YES												YES
BDH2	c1_3	c1_6	c1_15	c1_40		2	0.735202	1	c1_40	c1_40	c1_40	c1_1		YES			YES									YES
PTPRT	c1_2	c1_5	c1_13	c1_35	c1_66		4	1.59079	0.525962	c1_66	c1_35	c1_2	c1_1	YES			YES								YES																						YES
VPS39	c1_2	c1_5	c1_13	c1_34	c1_60		5	2.49234	0.718323	c1_60	c1_60	c1_2	c1_1	YES			YES								YES																					YES
LOC110483156	c1_3	c1_8		1	0.400322	NaN	NA	c1_8	c1_8	c1_1		YES					YES
USP30	c1_3	c1_7	c1_19		1	0.400133	NaN	NA	c1_7	c1_7	c1_1		YES				YES												YES
SFSWAP	c1_2	c1_5	c1_13		2	0.788018	0	NA	NA	c1_2	c1_1	YES			YES								YES
TECPR1	c1_3	c1_8	c1_22		2	0.764042	1	c1_22	c1_8	c1_8	c1_1		YES					YES														YES
ALDH1A2	c1_2	c1_4	c1_9	c1_27		4	1.76571	0.32555	NA	c1_4	c1_2	c1_1	YES		YES					YES																		YES
LOC110482162	c1_2	c1_5	c1_14	c1_38		1	0.39932	NaN	NA	c1_14	c1_2	c1_1	YES			YES									YES																							YES
NSUN2	c1_2	c1_5	c1_13		2	0.817667	1	NA	NA	c1_2	c1_1	YES			YES								YES
KIAA0930	c1_2	c1_5	c1_13		2	0.767142	0	NA	NA	c1_2	c1_1	YES			YES								YES
NPTX1	c1_2	c1_5	c1_13		3	1.26489	0.651772	NA	NA	c1_2	c1_1	YES			YES								YES
PDYN	c1_3	c1_6	c1_15	c1_44		1	0.397371	NaN	c1_44	c1_44	c1_44	c1_1		YES			YES									YES
ZIC1	c1_2	c1_5	c1_14	c1_38		1	0.396986	NaN	NA	c1_14	c1_2	c1_1	YES			YES									YES																							YES
WNT5A	c1_3	c1_6	c1_15	c1_40		2	0.790018	1	c1_40	c1_40	c1_40	c1_1		YES			YES									YES
SRGN	c1_2	c1_4		1	0.396702	NaN	NA	c1_4	c1_2	c1_1	YES		YES
WDR75	c1_2	c1_5	c1_14	c1_38	c1_67		2	0.790441	0	c1_67	c1_14	c1_2	c1_1	YES			YES									YES																							YES
RIPK4	c1_3	c1_6	c1_15	c1_40		1	0.396409	NaN	c1_40	c1_40	c1_40	c1_1		YES			YES									YES
RAB3B	c1_3	c1_6	c1_15	c1_40		1	0.395999	NaN	c1_40	c1_40	c1_40	c1_1		YES			YES									YES
DSC1	c1_3	c1_6	c1_15	c1_40		3	1.27021	0.67023	c1_40	c1_40	c1_40	c1_1		YES			YES									YES
LOC110477143	c1_3	c1_6	c1_15	c1_40		2	0.732571	1	c1_40	c1_40	c1_40	c1_1		YES			YES									YES
LOC110482988	c1_3	c1_8	c1_24		3	1.27396	0.663142	c1_24	c1_8	c1_8	c1_1		YES					YES																YES
AFG1L	c1_3	c1_6	c1_16		3	1.17395	0.67529	c1_16	c1_16	c1_16	c1_1		YES			YES										YES
PEX19	c1_2	c1_5	c1_13	c1_34	c1_61		3	1.25952	1	c1_61	c1_61	c1_2	c1_1	YES			YES								YES																					YES
GPR146	c1_3	c1_6		1	0.394338	NaN	NA	NA	NA	c1_1		YES			YES
LOC110478081	c1_3	c1_7	c1_21		1	0.394311	NaN	c1_21	c1_7	c1_7	c1_1		YES				YES														YES
RIMBP2	c1_2	c1_5	c1_14	c1_38	c1_69		3	1.07611	0.667542	c1_69	c1_14	c1_2	c1_1	YES			YES									YES																							YES
MARVELD1	c1_2	c1_5	c1_14	c1_38		2	0.764097	0	NA	c1_14	c1_2	c1_1	YES			YES									YES																							YES
VAMP3	c1_3	c1_6	c1_15	c1_40		1	0.39418	NaN	c1_40	c1_40	c1_40	c1_1		YES			YES									YES
GRIK1	c1_2	c1_4	c1_12		3	1.2135	0.337122	c1_12	c1_4	c1_2	c1_1	YES		YES								YES
CMC2	c1_3	c1_6	c1_15	c1_41		3	1.35858	1	c1_41	c1_41	c1_41	c1_1		YES			YES									YES
CCDC137	c1_3	c1_6	c1_17	c1_47	c1_74		3	1.15064	1	c1_74	c1_17	c1_17	c1_1		YES			YES											YES
PRKAR2A	c1_3	c1_7	c1_19	c1_50		2	0.758359	1	c1_50	c1_7	c1_7	c1_1		YES				YES												YES
IGF2	c1_3	c1_6	c1_15	c1_40		2	0.7365	0	c1_40	c1_40	c1_40	c1_1		YES			YES									YES
NBR1	c1_3	c1_7	c1_20		5	2.28885	0.714886	c1_20	c1_7	c1_7	c1_1		YES				YES													YES
CNPY3	c1_3	c1_6	c1_16		2	0.863385	0	c1_16	c1_16	c1_16	c1_1		YES			YES										YES
NT5DC3	c1_3	c1_6	c1_16		3	1.49442	0.277126	c1_16	c1_16	c1_16	c1_1		YES			YES										YES
RPS6KA2	c1_2	c1_5	c1_14	c1_38	c1_67		1	0.391456	NaN	c1_67	c1_14	c1_2	c1_1	YES			YES									YES																							YES
SLC9A1	c1_2	c1_5	c1_13	c1_37		3	1.34954	1	c1_37	c1_37	c1_2	c1_1	YES			YES								YES																							YES
LOC110470596	c1_3		3	1.26918	1	NA	NA	NA	c1_1		YES
AMN1	c1_2	c1_5	c1_13	c1_34	c1_63		2	0.900998	0	c1_63	c1_63	c1_2	c1_1	YES			YES								YES																					YES
ECE2	c1_3	c1_6	c1_15	c1_40		4	1.71251	0.849209	c1_40	c1_40	c1_40	c1_1		YES			YES									YES
ZDHHC7	c1_2	c1_5	c1_14	c1_38	c1_67		4	1.70148	0.491293	c1_67	c1_14	c1_2	c1_1	YES			YES									YES																							YES
EFNA2	c1_2	c1_4	c1_10		3	1.03426	1	c1_10	c1_4	c1_2	c1_1	YES		YES						YES
TJP1	c1_2	c1_5	c1_13	c1_34	c1_60		3	1.24074	1	c1_60	c1_60	c1_2	c1_1	YES			YES								YES																					YES
LOC110473703	c1_2	c1_5	c1_13	c1_35	c1_65		5	1.96883	0.710944	c1_65	c1_35	c1_2	c1_1	YES			YES								YES																						YES
ILKAP	c1_3	c1_7	c1_19	c1_50		4	1.62909	0.511752	c1_50	c1_7	c1_7	c1_1		YES				YES												YES
DERA	c1_3	c1_7	c1_21	c1_21	5	1.90252	0.0968767	c1_21	c1_7	c1_7	c1_1		YES				YES														YES
PNN	c1_3	c1_7	c1_19	c1_50		8	3.9111	0.416178	c1_50	c1_7	c1_7	c1_1		YES				YES												YES
ZDHHC1	c1_2	c1_5	c1_13	c1_34	c1_60		1	0.387004	NaN	c1_60	c1_60	c1_2	c1_1	YES			YES								YES																					YES
PPP1R1B	c1_3	c1_8	c1_22		6	2.65379	0.337935	c1_22	c1_8	c1_8	c1_1		YES					YES														YES
CCDC90B	c1_2	c1_5	c1_14	c1_39		4	1.54312	0.666667	c1_39	c1_14	c1_2	c1_1	YES			YES									YES																								YES
CRAT	c1_2	c1_5	c1_13	c1_35	c1_65		2	0.730746	1	c1_65	c1_35	c1_2	c1_1	YES			YES								YES																						YES
PUM3	c1_3	c1_7	c1_19	c1_50		1	0.384206	NaN	c1_50	c1_7	c1_7	c1_1		YES				YES												YES
LYPD1	c1_2	c1_4	c1_9	c1_30		1	0.384032	NaN	c1_30	c1_4	c1_2	c1_1	YES		YES					YES																					YES
GTF2F1	c1_2	c1_5	c1_14	c1_38	c1_67		7	3.26944	0.485364	c1_67	c1_14	c1_2	c1_1	YES			YES									YES																							YES
PRKX	c1_3	c1_6	c1_15	c1_40		2	0.712276	1	c1_40	c1_40	c1_40	c1_1		YES			YES									YES
AMT	c1_3	c1_7	c1_21		1	0.38306	NaN	c1_21	c1_7	c1_7	c1_1		YES				YES														YES
UNC80	c1_2	c1_5	c1_13	c1_34	c1_61		3	1.26818	1	c1_61	c1_61	c1_2	c1_1	YES			YES								YES																					YES
ANKRD28	c1_2	c1_5	c1_14	c1_38	c1_67		4	1.72622	0.474651	c1_67	c1_14	c1_2	c1_1	YES			YES									YES																							YES
TLE3	c1_2	c1_5	c1_13	c1_34	c1_60		4	1.60965	0.682186	c1_60	c1_60	c1_2	c1_1	YES			YES								YES																					YES
MBTD1	c1_3	c1_6	c1_15	c1_40		2	0.755004	0	c1_40	c1_40	c1_40	c1_1		YES			YES									YES
IL18BP	c1_3	c1_6	c1_17	c1_48	c1_48	4	1.64106	0.348187	c1_48	c1_17	c1_17	c1_1		YES			YES											YES
RGS5	c1_3	c1_6	c1_15	c1_40		1	0.379261	NaN	c1_40	c1_40	c1_40	c1_1		YES			YES									YES
CHST8	c1_3	c1_7	c1_19	c1_50		2	0.723056	1	c1_50	c1_7	c1_7	c1_1		YES				YES												YES
PYGO2	c1_3	c1_6	c1_16		6	2.62965	0.517969	c1_16	c1_16	c1_16	c1_1		YES			YES										YES
KCNT2	c1_3	c1_7	c1_19	c1_50		1	0.379159	NaN	c1_50	c1_7	c1_7	c1_1		YES				YES												YES
PRLR	c1_2	c1_4	c1_9	c1_27	c1_54		1	0.378689	NaN	c1_54	c1_4	c1_2	c1_1	YES		YES					YES																		YES
METTL26	c1_2	c1_4	c1_9	c1_33		2	0.804024	0	c1_33	c1_4	c1_2	c1_1	YES		YES					YES																								YES
RBM43	c1_2	c1_5	c1_13	c1_34	c1_60		2	0.793025	0	c1_60	c1_60	c1_2	c1_1	YES			YES								YES																					YES
UBFD1	c1_2	c1_5	c1_14	c1_38		1	0.377932	NaN	NA	c1_14	c1_2	c1_1	YES			YES									YES																							YES
METTL4	c1_3	c1_8		1	0.377618	NaN	NA	c1_8	c1_8	c1_1		YES					YES
MAP3K12	c1_2	c1_5	c1_13	c1_35	c1_65		1	0.376894	NaN	c1_65	c1_35	c1_2	c1_1	YES			YES								YES																						YES
PRDM2	c1_2	c1_5	c1_13	c1_34	c1_60		3	1.37305	1	c1_60	c1_60	c1_2	c1_1	YES			YES								YES																					YES
CAP2	c1_2	c1_5	c1_13	c1_34	c1_60		5	2.23564	0.691344	c1_60	c1_60	c1_2	c1_1	YES			YES								YES																					YES
FBXL4	c1_3	c1_7	c1_20		5	2.03118	0.405524	c1_20	c1_7	c1_7	c1_1		YES				YES													YES
LOC116184561	c1_3	c1_7	c1_19		2	0.704635	1	NA	c1_7	c1_7	c1_1		YES				YES												YES
CCN2	c1_3	c1_7	c1_19	c1_50		3	1.17783	0.681522	c1_50	c1_7	c1_7	c1_1		YES				YES												YES
TXNL4B	c1_2	c1_5	c1_14	c1_38	c1_68		4	1.52587	0.69119	c1_68	c1_14	c1_2	c1_1	YES			YES									YES																							YES
MRPS7	c1_2	c1_5	c1_14	c1_39		1	0.374573	NaN	c1_39	c1_14	c1_2	c1_1	YES			YES									YES																								YES
GTF3C2	c1_3	c1_6	c1_17	c1_47	c1_75		2	0.801623	1	c1_75	c1_17	c1_17	c1_1		YES			YES											YES
MMACHC	c1_3	c1_6	c1_15	c1_40		2	0.827487	0	c1_40	c1_40	c1_40	c1_1		YES			YES									YES
LOC110473507	c1_3	c1_6	c1_15	c1_40		3	1.16018	0.693909	c1_40	c1_40	c1_40	c1_1		YES			YES									YES
SV2B	c1_2	c1_4	c1_9	c1_27	c1_55		4	1.75969	0.525013	c1_55	c1_4	c1_2	c1_1	YES		YES					YES																		YES
YPEL4	c1_3	c1_6	c1_15	c1_40		5	2.0052	0.405483	c1_40	c1_40	c1_40	c1_1		YES			YES									YES
SEC14L1	c1_2	c1_5	c1_14	c1_38	c1_67		2	0.847097	1	c1_67	c1_14	c1_2	c1_1	YES			YES									YES																							YES
UBR4	c1_2	c1_4	c1_9	c1_27	c1_55		1	0.373203	NaN	c1_55	c1_4	c1_2	c1_1	YES		YES					YES																		YES
PATJ	c1_2	c1_4	c1_9	c1_27	c1_55		1	0.372772	NaN	c1_55	c1_4	c1_2	c1_1	YES		YES					YES																		YES
LOC116184739	c1_2	c1_5	c1_13	c1_35	c1_66		5	1.92363	0.291787	c1_66	c1_35	c1_2	c1_1	YES			YES								YES																						YES
NECTIN3	c1_2	c1_5	c1_14	c1_38	c1_67		1	0.371524	NaN	c1_67	c1_14	c1_2	c1_1	YES			YES									YES																							YES
FBXL18	c1_3	c1_6	c1_15	c1_40		3	1.12416	0.334956	c1_40	c1_40	c1_40	c1_1		YES			YES									YES
RIOK3	c1_2	c1_5	c1_13	c1_35	c1_65		3	1.27412	1	c1_65	c1_35	c1_2	c1_1	YES			YES								YES																						YES
NOSIP	c1_3	c1_6	c1_16		4	1.54875	0	c1_16	c1_16	c1_16	c1_1		YES			YES										YES
DCAF5	c1_3	c1_6	c1_15	c1_40		5	2.01453	0.414494	c1_40	c1_40	c1_40	c1_1		YES			YES									YES
TAGAP	c1_3	c1_7	c1_19		2	0.691349	1	NA	c1_7	c1_7	c1_1		YES				YES												YES
SOX8	c1_2	c1_5	c1_14	c1_38	c1_67		2	0.817432	1	c1_67	c1_14	c1_2	c1_1	YES			YES									YES																							YES
TOX	c1_3	c1_6	c1_15	c1_40		3	1.24737	0.32233	c1_40	c1_40	c1_40	c1_1		YES			YES									YES
LOC110476506	c1_2	c1_5	c1_13	c1_35	c1_66		2	0.722167	1	c1_66	c1_35	c1_2	c1_1	YES			YES								YES																						YES
PHF21A	c1_3	c1_6	c1_17	c1_49		5	2.09853	0.204795	c1_49	c1_17	c1_17	c1_1		YES			YES											YES
RPS6KC1	c1_3	c1_7	c1_19	c1_50		2	0.796267	1	c1_50	c1_7	c1_7	c1_1		YES				YES												YES
LOC110471598	c1_3	c1_6	c1_15	c1_40		2	0.833253	1	c1_40	c1_40	c1_40	c1_1		YES			YES									YES
DHRS7	c1_3	c1_6	c1_15	c1_40		4	1.65928	0.321403	c1_40	c1_40	c1_40	c1_1		YES			YES									YES
RASD2	c1_3	c1_8	c1_22		3	1.32128	1	c1_22	c1_8	c1_8	c1_1		YES					YES														YES
ATAD2B	c1_2	c1_4	c1_9	c1_27	c1_55		4	1.63238	0.667255	c1_55	c1_4	c1_2	c1_1	YES		YES					YES																		YES
LOC110483623	c1_3	c1_6	c1_15	c1_40		3	1.30728	1	c1_40	c1_40	c1_40	c1_1		YES			YES									YES
GTF2H5	c1_3	c1_6	c1_15	c1_40		5	2.52731	0.528943	c1_40	c1_40	c1_40	c1_1		YES			YES									YES
RAD9B	c1_3	c1_8	c1_26		1	0.363412	NaN	c1_26	c1_8	c1_8	c1_1		YES					YES																		YES
INTS12	c1_2	c1_5	c1_13	c1_34		1	0.363036	NaN	NA	NA	c1_2	c1_1	YES			YES								YES																					YES
PURG	c1_3	c1_7	c1_19	c1_50		4	1.636	0.321371	c1_50	c1_7	c1_7	c1_1		YES				YES												YES
COG3	c1_3	c1_6	c1_15	c1_42		1	0.361866	NaN	NA	c1_42	c1_42	c1_1		YES			YES									YES
RCC1L	c1_2	c1_5	c1_14	c1_38	c1_67		3	1.16487	1	c1_67	c1_14	c1_2	c1_1	YES			YES									YES																							YES
MSI2	c1_3	c1_7	c1_19	c1_50		3	1.29914	1	c1_50	c1_7	c1_7	c1_1		YES				YES												YES
GPER1	c1_3	c1_6	c1_15	c1_40		1	0.359769	NaN	c1_40	c1_40	c1_40	c1_1		YES			YES									YES
HS3ST4	c1_3	c1_8	c1_23		1	0.359554	NaN	c1_23	c1_8	c1_8	c1_1		YES					YES															YES
TNFRSF21	c1_2	c1_5	c1_14	c1_38	c1_67		5	2.55939	0.53235	c1_67	c1_14	c1_2	c1_1	YES			YES									YES																							YES
METTL8	c1_3	c1_6	c1_15	c1_40		1	0.358644	NaN	c1_40	c1_40	c1_40	c1_1		YES			YES									YES
ROCK2	c1_3	c1_7	c1_19	c1_50		3	1.30081	1	c1_50	c1_7	c1_7	c1_1		YES				YES												YES
MRPS30	c1_2	c1_5	c1_14	c1_39		3	1.14337	0.343925	c1_39	c1_14	c1_2	c1_1	YES			YES									YES																								YES
CELA3B	c1_3	c1_8	c1_22		2	0.811742	0	c1_22	c1_8	c1_8	c1_1		YES					YES														YES
LOXL1	c1_3	c1_6	c1_15	c1_40		3	1.11918	1	c1_40	c1_40	c1_40	c1_1		YES			YES									YES
CALN1	c1_2	c1_5	c1_13	c1_35	c1_65		7	3.25942	0.45693	c1_65	c1_35	c1_2	c1_1	YES			YES								YES																						YES
PPP1R13B	c1_3	c1_7	c1_19	c1_50		6	2.48547	0.193068	c1_50	c1_7	c1_7	c1_1		YES				YES												YES
MCL1	c1_2	c1_5	c1_13	c1_34	c1_61		3	1.22435	1	c1_61	c1_61	c1_2	c1_1	YES			YES								YES																					YES
LSP1	c1_2	c1_5	c1_13	c1_34	c1_60		2	0.777563	1	c1_60	c1_60	c1_2	c1_1	YES			YES								YES																					YES
CNTFR	c1_3	c1_6	c1_15	c1_40		1	0.354211	NaN	c1_40	c1_40	c1_40	c1_1		YES			YES									YES
MAN2A2	c1_2	c1_4	c1_12		4	1.66065	0.333333	c1_12	c1_4	c1_2	c1_1	YES		YES								YES
ACKR3	c1_3	c1_6	c1_15	c1_41		1	0.353756	NaN	c1_41	c1_41	c1_41	c1_1		YES			YES									YES
CCDC39	c1_3	c1_6	c1_15	c1_40		2	0.786493	1	c1_40	c1_40	c1_40	c1_1		YES			YES									YES
RNF165	c1_3	c1_7	c1_20		1	0.352327	NaN	c1_20	c1_7	c1_7	c1_1		YES				YES													YES
NUB1	c1_3	c1_7	c1_19	c1_50		6	2.66916	0.40337	c1_50	c1_7	c1_7	c1_1		YES				YES												YES
LOC110473800	c1_3	c1_7	c1_19	c1_50		2	0.700285	0	c1_50	c1_7	c1_7	c1_1		YES				YES												YES
LOC110480422	c1_3	c1_6	c1_15	c1_40		2	0.751543	0	c1_40	c1_40	c1_40	c1_1		YES			YES									YES
OTX1	c1_3	c1_6	c1_15	c1_40		1	0.351073	NaN	c1_40	c1_40	c1_40	c1_1		YES			YES									YES
KCNJ2	c1_3	c1_7	c1_19		1	0.350715	NaN	NA	c1_7	c1_7	c1_1		YES				YES												YES
SLC16A9	c1_3	c1_8	c1_23		5	2.29813	0.549444	c1_23	c1_8	c1_8	c1_1		YES					YES															YES
SLC37A3	c1_2	c1_4	c1_12		3	1.12613	0.345882	c1_12	c1_4	c1_2	c1_1	YES		YES								YES
RAB39A	c1_3	c1_6	c1_15	c1_41		1	0.349734	NaN	c1_41	c1_41	c1_41	c1_1		YES			YES									YES
LOC116183579	c1_2	c1_5	c1_14	c1_38	c1_67		4	1.63959	0.834365	c1_67	c1_14	c1_2	c1_1	YES			YES									YES																							YES
CPNE4	c1_2	c1_5	c1_14	c1_38	c1_67		3	1.21407	0.716183	c1_67	c1_14	c1_2	c1_1	YES			YES									YES																							YES
GOLIM4	c1_2	c1_5	c1_13	c1_34	c1_60		6	2.93114	0.554033	c1_60	c1_60	c1_2	c1_1	YES			YES								YES																					YES
LOC116184632	c1_2	c1_5	c1_13		3	1.16982	0	NA	NA	c1_2	c1_1	YES			YES								YES
PLXND1	c1_2	c1_5	c1_13	c1_35	c1_65		4	1.45652	0.820443	c1_65	c1_35	c1_2	c1_1	YES			YES								YES																						YES
PSMG1	c1_2	c1_5	c1_13	c1_35	c1_65		3	1.29394	1	c1_65	c1_35	c1_2	c1_1	YES			YES								YES																						YES
LOC110473340	c1_2	c1_5	c1_14	c1_38	c1_67		2	0.729288	1	c1_67	c1_14	c1_2	c1_1	YES			YES									YES																							YES
GALNTL6	c1_2	c1_5	c1_13		4	1.57561	0.175219	NA	NA	c1_2	c1_1	YES			YES								YES
CMIP	c1_2	c1_5	c1_13	c1_35	c1_65		2	0.860029	1	c1_65	c1_35	c1_2	c1_1	YES			YES								YES																						YES
NRBP1	c1_2	c1_5	c1_13	c1_34	c1_60		4	1.90486	0.850913	c1_60	c1_60	c1_2	c1_1	YES			YES								YES																					YES
SLC25A24	c1_3	c1_6	c1_15	c1_40		2	0.748667	1	c1_40	c1_40	c1_40	c1_1		YES			YES									YES
CHRNA4	c1_3	c1_6	c1_15	c1_40		1	0.345249	NaN	c1_40	c1_40	c1_40	c1_1		YES			YES									YES
MBD4	c1_3	c1_6	c1_15	c1_40		1	0.343787	NaN	c1_40	c1_40	c1_40	c1_1		YES			YES									YES
RND3	c1_2	c1_5	c1_13	c1_34	c1_62	c1_80		2	0.739574	1	c1_80	c1_62	c1_2	c1_1	YES			YES								YES																					YES
MARCHF1	c1_2	c1_5	c1_13		4	1.60376	0.482121	NA	NA	c1_2	c1_1	YES			YES								YES
LOC116183649	c1_3	c1_6	c1_15	c1_41		2	0.782008	1	c1_41	c1_41	c1_41	c1_1		YES			YES									YES
MAP2K1	c1_3	c1_6	c1_17	c1_49		4	1.66688	0.491817	c1_49	c1_17	c1_17	c1_1		YES			YES											YES
TUBB3	c1_3	c1_6	c1_15	c1_40		7	3.39891	0.366179	c1_40	c1_40	c1_40	c1_1		YES			YES									YES
DHX9	c1_3	c1_6	c1_15	c1_40		1	0.338106	NaN	c1_40	c1_40	c1_40	c1_1		YES			YES									YES
LOC110478553	c1_3	c1_6	c1_17	c1_47	c1_74		5	1.89617	0.493502	c1_74	c1_17	c1_17	c1_1		YES			YES											YES
LOC110476874	c1_2	c1_4	c1_11		2	0.872519	1	c1_11	c1_4	c1_2	c1_1	YES		YES							YES
SRD5A2	c1_2	c1_5	c1_14	c1_38	c1_67		4	1.48462	0.493781	c1_67	c1_14	c1_2	c1_1	YES			YES									YES																							YES
LOC110478414	c1_2	c1_5	c1_13	c1_35	c1_66		2	0.731457	1	c1_66	c1_35	c1_2	c1_1	YES			YES								YES																						YES
COPS6	c1_3	c1_7	c1_19	c1_50		2	0.810339	1	c1_50	c1_7	c1_7	c1_1		YES				YES												YES
CTSO	c1_3	c1_7	c1_20		3	1.30255	0.694004	c1_20	c1_7	c1_7	c1_1		YES				YES													YES
LOC110480168	c1_2	c1_4	c1_9	c1_27	c1_57		2	0.759112	1	c1_57	c1_4	c1_2	c1_1	YES		YES					YES																		YES
ALYREF	c1_2	c1_5	c1_13	c1_35	c1_65		3	1.32197	1	c1_65	c1_35	c1_2	c1_1	YES			YES								YES																						YES
HMGB2	c1_3	c1_6	c1_15	c1_40		2	0.746106	1	c1_40	c1_40	c1_40	c1_1		YES			YES									YES
CYSTM1	c1_3	c1_6	c1_15	c1_40		12	6.75475	0.341677	c1_40	c1_40	c1_40	c1_1		YES			YES									YES
HAPLN2	c1_2	c1_5	c1_13	c1_34	c1_60		4	1.53081	0.160705	c1_60	c1_60	c1_2	c1_1	YES			YES								YES																					YES
PRDM8	c1_2	c1_5	c1_14	c1_39		2	0.713871	0	c1_39	c1_14	c1_2	c1_1	YES			YES									YES																								YES
HS6ST1	c1_2	c1_5	c1_13	c1_34	c1_60		4	1.67982	0.636814	c1_60	c1_60	c1_2	c1_1	YES			YES								YES																					YES
POLR2C	c1_3	c1_6	c1_15	c1_41		3	1.32097	0.375624	c1_41	c1_41	c1_41	c1_1		YES			YES									YES
VPS4B	c1_3	c1_6	c1_16		5	1.94363	0.618086	c1_16	c1_16	c1_16	c1_1		YES			YES										YES
WSCD1	c1_2	c1_5	c1_13	c1_34	c1_60		3	1.16944	0.323054	c1_60	c1_60	c1_2	c1_1	YES			YES								YES																					YES
LOC110474837	c1_2	c1_4	c1_9	c1_27	c1_55		2	0.792339	1	c1_55	c1_4	c1_2	c1_1	YES		YES					YES																		YES
TECR	c1_2	c1_4	c1_10		2	0.744545	0	c1_10	c1_4	c1_2	c1_1	YES		YES						YES
PRPF39	c1_3	c1_6	c1_16		9	3.94417	0.316136	c1_16	c1_16	c1_16	c1_1		YES			YES										YES
KAT6B	c1_2	c1_5	c1_13		4	1.69892	0.535962	NA	NA	c1_2	c1_1	YES			YES								YES
LOC116184575	c1_3	c1_6	c1_17	c1_49		2	0.78909	1	c1_49	c1_17	c1_17	c1_1		YES			YES											YES
C2CD4C	c1_3	c1_6	c1_15		1	-0.32134	NaN	NA	NA	NA	c1_1		YES			YES									YES
LOC110476390	c1_3	c1_6	c1_15	c1_40	c1_1	c1_3	c1_6	c1_15	c1_40	28	19.9554	0.152891	c1_40	c1_40	c1_40	c1_1		YES			YES									YES
RPL30	c1_3	c1_6	c1_15	c1_40		4	3.4387	0.83345	c1_40	c1_40	c1_40	c1_1		YES			YES									YES
LOC110479911	c1_3	c1_6	c1_15	c1_40		12	7.3198	0.327985	c1_40	c1_40	c1_40	c1_1		YES			YES									YES
ADGRB1	c1_2	c1_4	c1_9	c1_27	c1_55		4	2.84703	0.838898	c1_55	c1_4	c1_2	c1_1	YES		YES					YES																		YES
DAD1	c1_3	c1_6	c1_15	c1_40		9	6.35935	0.425174	c1_40	c1_40	c1_40	c1_1		YES			YES									YES
RUNX1T1	c1_2	c1_4	c1_9	c1_27	c1_55	c1_1	c1_2	c1_4	c1_9	19	11.4307	0.217105	c1_55	c1_4	c1_2	c1_1	YES		YES					YES																		YES
UBE2D2	c1_2	c1_4	c1_9	c1_27	c1_55		6	3.94292	0.567338	c1_55	c1_4	c1_2	c1_1	YES		YES					YES																		YES
CLU	c1_3	c1_6	c1_15	c1_40		6	3.87504	0.505328	c1_40	c1_40	c1_40	c1_1		YES			YES									YES
MGST3	c1_3	c1_6	c1_15	c1_40		3	2.17546	1	c1_40	c1_40	c1_40	c1_1		YES			YES									YES
ACSL6	c1_2	c1_5	c1_13	c1_34	c1_60		8	4.23768	0.449624	c1_60	c1_60	c1_2	c1_1	YES			YES								YES																					YES
LOC110476798	c1_3	c1_6	c1_15	c1_40		3	1.52277	0.611131	c1_40	c1_40	c1_40	c1_1		YES			YES									YES
IDH3B	c1_3	c1_6	c1_15	c1_40		4	2.51663	0.852024	c1_40	c1_40	c1_40	c1_1		YES			YES									YES
JADE2	c1_2	c1_5	c1_13	c1_34	c1_60	c1_1	c1_2	c1_5	c1_13	15	8.64888	0.253724	c1_60	c1_60	c1_2	c1_1	YES			YES								YES																					YES
LOC110481222	c1_3	c1_6	c1_15	c1_40		4	2.39155	0.534577	c1_40	c1_40	c1_40	c1_1		YES			YES									YES
CPLX2	c1_3	c1_6	c1_15	c1_40		10	4.9928	0.294731	c1_40	c1_40	c1_40	c1_1		YES			YES									YES
TWNK	c1_3	c1_6	c1_15	c1_41		4	2.38296	0.704322	c1_41	c1_41	c1_41	c1_1		YES			YES									YES
LOC110471349	c1_2	c1_4	c1_9	c1_27	c1_52	c1_1	c1_2	c1_4	c1_9	c1_27	20	11.539	0.187247	c1_52	c1_4	c1_2	c1_1	YES		YES					YES																		YES
FOXG1	c1_2	c1_4	c1_9	c1_27		9	4.79282	0.38709	NA	c1_4	c1_2	c1_1	YES		YES					YES																		YES
LOC110474598	c1_2	c1_4	c1_9	c1_27	c1_55		12	6.41896	0.332258	c1_55	c1_4	c1_2	c1_1	YES		YES					YES																		YES
PYCR3	c1_3	c1_6	c1_15	c1_40		12	6.18619	0.3256	c1_40	c1_40	c1_40	c1_1		YES			YES									YES
MRPL21	c1_3	c1_6	c1_15	c1_41		4	2.44293	0.85012	c1_41	c1_41	c1_41	c1_1		YES			YES									YES
MMP16	c1_3	c1_8	c1_22		11	5.07553	0.266566	c1_22	c1_8	c1_8	c1_1		YES					YES														YES
LOC110482660	c1_3	c1_6	c1_15	c1_40		2	1.01863	1	c1_40	c1_40	c1_40	c1_1		YES			YES									YES
LOC110474790	c1_2	c1_4	c1_9	c1_27	c1_55		5	2.95525	0.712604	c1_55	c1_4	c1_2	c1_1	YES		YES					YES																		YES
HEXIM1	c1_2	c1_5	c1_13	c1_34	c1_60		8	4.4913	0.458247	c1_60	c1_60	c1_2	c1_1	YES			YES								YES																					YES
WWP1	c1_2	c1_5	c1_13	c1_34	c1_60		9	4.72268	0.373241	c1_60	c1_60	c1_2	c1_1	YES			YES								YES																					YES
DDX46	c1_3	c1_7	c1_19	c1_50		8	3.94201	0.477958	c1_50	c1_7	c1_7	c1_1		YES				YES												YES
CXXC5	c1_2	c1_5	c1_13	c1_34	c1_60		4	2.09299	0.690211	c1_60	c1_60	c1_2	c1_1	YES			YES								YES																					YES
LYRM4	c1_3	c1_6	c1_15	c1_40		3	1.83715	1	c1_40	c1_40	c1_40	c1_1		YES			YES									YES
RUSC1	c1_3	c1_6	c1_15	c1_40		3	1.83278	1	c1_40	c1_40	c1_40	c1_1		YES			YES									YES
AUTS2	c1_2	c1_4	c1_9	c1_27	c1_55		10	5.4795	0.375929	c1_55	c1_4	c1_2	c1_1	YES		YES					YES																		YES
RARRES2	c1_3	c1_6	c1_15	c1_40		4	2.37445	0.520006	c1_40	c1_40	c1_40	c1_1		YES			YES									YES
CREM	c1_3	c1_6	c1_17	c1_47	c1_74		8	4.33527	0.449679	c1_74	c1_17	c1_17	c1_1		YES			YES											YES
CEND1	c1_2	c1_5	c1_13	c1_34	c1_60		5	2.44494	0.436365	c1_60	c1_60	c1_2	c1_1	YES			YES								YES																					YES
ITGB1	c1_2	c1_5	c1_13	c1_34	c1_60		5	2.43827	0.715257	c1_60	c1_60	c1_2	c1_1	YES			YES								YES																					YES
LSM6	c1_3	c1_6	c1_15	c1_40		5	2.64628	0.520931	c1_40	c1_40	c1_40	c1_1		YES			YES									YES
LOC110472175	c1_3	c1_6	c1_15	c1_40		4	2.21253	0.698343	c1_40	c1_40	c1_40	c1_1		YES			YES									YES
CXCL14	c1_2	c1_4	c1_9	c1_27		6	2.86787	0.615557	NA	c1_4	c1_2	c1_1	YES		YES					YES																		YES
NPM1	c1_3	c1_7	c1_19	c1_50		7	3.83674	0.4964	c1_50	c1_7	c1_7	c1_1		YES				YES												YES
FAM131A	c1_3	c1_6	c1_15	c1_40		3	1.69809	1	c1_40	c1_40	c1_40	c1_1		YES			YES									YES
NPY	c1_3	c1_6	c1_15	c1_41		3	1.69877	1	c1_41	c1_41	c1_41	c1_1		YES			YES									YES
SCG2	c1_3	c1_6	c1_17	c1_47	c1_74		5	2.4185	0.735992	c1_74	c1_17	c1_17	c1_1		YES			YES											YES
RBFA	c1_3	c1_6	c1_15	c1_40		4	2.13959	0.675809	c1_40	c1_40	c1_40	c1_1		YES			YES									YES
DAAM1	c1_2	c1_4	c1_9	c1_27		4	2.20286	0.844362	NA	c1_4	c1_2	c1_1	YES		YES					YES																		YES
NDUFV3	c1_3	c1_6	c1_15	c1_40		4	2.32897	0.844923	c1_40	c1_40	c1_40	c1_1		YES			YES									YES
PTP4A3	c1_2	c1_4	c1_9	c1_27	c1_55		4	2.0882	0.853447	c1_55	c1_4	c1_2	c1_1	YES		YES					YES																		YES
KDM6A	c1_2	c1_4	c1_9	c1_27	c1_55		3	1.71652	1	c1_55	c1_4	c1_2	c1_1	YES		YES					YES																		YES
THRB	c1_2	c1_5	c1_13	c1_34	c1_60		3	1.71578	1	c1_60	c1_60	c1_2	c1_1	YES			YES								YES																					YES
WAC	c1_2	c1_5	c1_13	c1_34	c1_60		3	1.81037	1	c1_60	c1_60	c1_2	c1_1	YES			YES								YES																					YES
SOX4	c1_2	c1_5	c1_14	c1_38	c1_67		5	2.37065	0.608549	c1_67	c1_14	c1_2	c1_1	YES			YES									YES																							YES
NRDE2	c1_3	c1_6	c1_15	c1_40		4	2.11656	0.855949	c1_40	c1_40	c1_40	c1_1		YES			YES									YES
VSTM2A	c1_2	c1_5	c1_13	c1_34	c1_60		3	1.76769	1	c1_60	c1_60	c1_2	c1_1	YES			YES								YES																					YES
NMT1	c1_3	c1_7	c1_20		7	3.13149	0.498508	c1_20	c1_7	c1_7	c1_1		YES				YES													YES
GIT1	c1_3	c1_6	c1_15	c1_40		3	1.64512	1	c1_40	c1_40	c1_40	c1_1		YES			YES									YES
TRIM9	c1_3	c1_6	c1_15	c1_40		8	3.90668	0.423289	c1_40	c1_40	c1_40	c1_1		YES			YES									YES
OXSR1	c1_2	c1_5	c1_13	c1_34	c1_60		3	1.60858	1	c1_60	c1_60	c1_2	c1_1	YES			YES								YES																					YES
TRIL	c1_2	c1_4	c1_9	c1_27	c1_55		4	2.04364	0.693026	c1_55	c1_4	c1_2	c1_1	YES		YES					YES																		YES
ANKRD11	c1_2	c1_5	c1_13	c1_35	c1_65		4	1.94908	0.692187	c1_65	c1_35	c1_2	c1_1	YES			YES								YES																						YES
CPLX3	c1_2	c1_5	c1_14	c1_38	c1_67		7	3.30973	0.288217	c1_67	c1_14	c1_2	c1_1	YES			YES									YES																							YES
GCHFR	c1_3	c1_6	c1_15	c1_40		7	3.54365	0.447526	c1_40	c1_40	c1_40	c1_1		YES			YES									YES
STC2	c1_2	c1_4	c1_9	c1_27	c1_56	c1_78		5	2.3735	0.520336	c1_78	c1_4	c1_2	c1_1	YES		YES					YES																		YES
PFN1	c1_3	c1_6	c1_15	c1_40		4	2.11902	0.850016	c1_40	c1_40	c1_40	c1_1		YES			YES									YES
VOPP1	c1_2	c1_5	c1_14	c1_38	c1_67		4	1.92091	0.666667	c1_67	c1_14	c1_2	c1_1	YES			YES									YES																							YES
OAZ2	c1_2	c1_4	c1_9	c1_27	c1_55		5	2.80884	0.6137	c1_55	c1_4	c1_2	c1_1	YES		YES					YES																		YES
LOC110481538	c1_3	c1_6	c1_15	c1_40		7	3.34019	0.401548	c1_40	c1_40	c1_40	c1_1		YES			YES									YES
DDX42	c1_3	c1_6	c1_15	c1_40		3	1.5563	1	c1_40	c1_40	c1_40	c1_1		YES			YES									YES
LOC110478803	c1_3	c1_6	c1_15	c1_41		8	3.80019	0.413803	c1_41	c1_41	c1_41	c1_1		YES			YES									YES
ZDHHC3	c1_2	c1_5	c1_14	c1_38	c1_67		5	2.09271	0.642561	c1_67	c1_14	c1_2	c1_1	YES			YES									YES																							YES
ICE1	c1_3	c1_7	c1_19	c1_50		8	3.91062	0.41182	c1_50	c1_7	c1_7	c1_1		YES				YES												YES
RPL22L1	c1_3	c1_6	c1_15	c1_42	c1_72		3	1.49897	1	c1_72	c1_42	c1_42	c1_1		YES			YES									YES
CSK	c1_2	c1_5	c1_13	c1_34	c1_60		6	2.86486	0.541452	c1_60	c1_60	c1_2	c1_1	YES			YES								YES																					YES
EMC2	c1_3	c1_6	c1_15	c1_40		5	2.30983	0.611814	c1_40	c1_40	c1_40	c1_1		YES			YES									YES
ERGIC1	c1_2	c1_5	c1_13	c1_34	c1_60		3	1.62001	1	c1_60	c1_60	c1_2	c1_1	YES			YES								YES																					YES
YPEL2	c1_2	c1_5	c1_13	c1_35	c1_65		9	4.19764	0.317126	c1_65	c1_35	c1_2	c1_1	YES			YES								YES																						YES
FASTK	c1_3	c1_6	c1_15	c1_40		4	1.94279	0.687386	c1_40	c1_40	c1_40	c1_1		YES			YES									YES
HDGFL3	c1_2	c1_4	c1_9	c1_27	c1_53		2	0.982077	1	c1_53	c1_4	c1_2	c1_1	YES		YES					YES																		YES
GLRX5	c1_2	c1_4	c1_10		5	2.22301	0.628853	c1_10	c1_4	c1_2	c1_1	YES		YES						YES
SPIRE2	c1_3	c1_6	c1_15	c1_40		6	3.02376	0.338927	c1_40	c1_40	c1_40	c1_1		YES			YES									YES
SLC18A3	c1_2	c1_5	c1_14	c1_38	c1_71		1	0.570339	NaN	c1_71	c1_14	c1_2	c1_1	YES			YES									YES																							YES
LOC110483029	c1_3	c1_6	c1_15	c1_40		5	2.30686	0.620595	c1_40	c1_40	c1_40	c1_1		YES			YES									YES
TSHZ3	c1_2	c1_5	c1_13	c1_34	c1_60		3	1.44152	1	c1_60	c1_60	c1_2	c1_1	YES			YES								YES																					YES
RIC8A	c1_3	c1_6	c1_15	c1_40		4	1.89436	0.466833	c1_40	c1_40	c1_40	c1_1		YES			YES									YES
LOC110482748	c1_3	c1_6	c1_15	c1_40		6	2.71964	0.335484	c1_40	c1_40	c1_40	c1_1		YES			YES									YES
SLC25A14	c1_3	c1_6	c1_15	c1_40		3	1.30917	1	c1_40	c1_40	c1_40	c1_1		YES			YES									YES
ETV5	c1_2	c1_4	c1_9	c1_27	c1_55		3	1.62031	1	c1_55	c1_4	c1_2	c1_1	YES		YES					YES																		YES
PRPF8	c1_3	c1_6	c1_15	c1_40		3	1.48286	1	c1_40	c1_40	c1_40	c1_1		YES			YES									YES
SYT12	c1_2	c1_4	c1_9	c1_27	c1_55		1	0.560278	NaN	c1_55	c1_4	c1_2	c1_1	YES		YES					YES																		YES
DNMT3A	c1_2	c1_4	c1_9	c1_27	c1_55		1	0.558633	NaN	c1_55	c1_4	c1_2	c1_1	YES		YES					YES																		YES
FGF1	c1_2	c1_4	c1_9	c1_28		6	2.74141	0.393102	c1_28	c1_4	c1_2	c1_1	YES		YES					YES																			YES
FJX1	c1_3	c1_6	c1_16		5	2.25796	0.502096	c1_16	c1_16	c1_16	c1_1		YES			YES										YES
GPX3	c1_3	c1_6	c1_15	c1_40		4	1.89316	0.671786	c1_40	c1_40	c1_40	c1_1		YES			YES									YES
SPECC1	c1_3	c1_6	c1_15	c1_40		4	1.87029	0.843737	c1_40	c1_40	c1_40	c1_1		YES			YES									YES
CAMK2N2	c1_2	c1_5	c1_13	c1_34	c1_61		3	1.61184	1	c1_61	c1_61	c1_2	c1_1	YES			YES								YES																					YES
CPT1A	c1_2	c1_5	c1_13	c1_34	c1_60		5	2.37046	0.597449	c1_60	c1_60	c1_2	c1_1	YES			YES								YES																					YES
LOC110475170	c1_2	c1_5	c1_13	c1_34	c1_60		3	1.43379	1	c1_60	c1_60	c1_2	c1_1	YES			YES								YES																					YES
LOC110479085	c1_3	c1_6	c1_16		2	1.00016	1	c1_16	c1_16	c1_16	c1_1		YES			YES										YES
USP3	c1_2	c1_5	c1_13		5	2.31931	0.411908	NA	NA	c1_2	c1_1	YES			YES								YES
DBN1	c1_3	c1_6	c1_15	c1_46		6	2.62552	0.551733	c1_46	c1_46	c1_46	c1_1		YES			YES									YES
CLPTM1	c1_3	c1_6	c1_15	c1_40		3	1.47295	1	c1_40	c1_40	c1_40	c1_1		YES			YES									YES
TCOF1	c1_2	c1_5	c1_13	c1_35	c1_65		3	1.45207	1	c1_65	c1_35	c1_2	c1_1	YES			YES								YES																						YES
LOC110479472	c1_3	c1_7	c1_19	c1_50		4	1.82203	0.686222	c1_50	c1_7	c1_7	c1_1		YES				YES												YES
GFOD1	c1_2	c1_5	c1_13		4	1.84902	0.818549	NA	NA	c1_2	c1_1	YES			YES								YES
ETFRF1	c1_3	c1_6	c1_15	c1_40		2	1.01927	0	c1_40	c1_40	c1_40	c1_1		YES			YES									YES
ZNF407	c1_3		5	2.27696	0.715388	NA	NA	NA	c1_1		YES
LOC110480324	c1_3	c1_6	c1_15	c1_40		1	0.540532	NaN	c1_40	c1_40	c1_40	c1_1		YES			YES									YES
ELOC	c1_3	c1_6	c1_15	c1_41		7	3.17009	0.399001	c1_41	c1_41	c1_41	c1_1		YES			YES									YES
SLC8A3	c1_2	c1_5	c1_13	c1_34	c1_60		4	1.84269	0.810775	c1_60	c1_60	c1_2	c1_1	YES			YES								YES																					YES
CLIP2	c1_2	c1_5	c1_13	c1_35	c1_65		5	2.38013	0.611172	c1_65	c1_35	c1_2	c1_1	YES			YES								YES																						YES
PDK2	c1_3	c1_6	c1_15	c1_40		3	1.31405	1	c1_40	c1_40	c1_40	c1_1		YES			YES									YES
GRIA1	c1_2	c1_5	c1_14	c1_38	c1_67		5	2.15488	0.188336	c1_67	c1_14	c1_2	c1_1	YES			YES									YES																							YES
LRRC4B	c1_2	c1_5	c1_14	c1_38	c1_67		4	2.12708	0.499731	c1_67	c1_14	c1_2	c1_1	YES			YES									YES																							YES
JCAD	c1_3	c1_6	c1_16		4	2.01325	0.836638	c1_16	c1_16	c1_16	c1_1		YES			YES										YES
COMMD9	c1_3	c1_6	c1_17	c1_49		9	3.77654	0.332691	c1_49	c1_17	c1_17	c1_1		YES			YES											YES
FKBP1B	c1_3	c1_6	c1_15	c1_40		3	1.30896	1	c1_40	c1_40	c1_40	c1_1		YES			YES									YES
ROCK1	c1_2	c1_5	c1_14	c1_38	c1_67		6	2.80219	0.60761	c1_67	c1_14	c1_2	c1_1	YES			YES									YES																							YES
HIP1	c1_3	c1_6	c1_15	c1_40		3	1.1997	1	c1_40	c1_40	c1_40	c1_1		YES			YES									YES
LOC110477417	c1_2	c1_5	c1_14	c1_38	c1_67		3	1.48338	0.341177	c1_67	c1_14	c1_2	c1_1	YES			YES									YES																							YES
MTSS2	c1_2	c1_4	c1_9	c1_27	c1_53		3	1.58954	1	c1_53	c1_4	c1_2	c1_1	YES		YES					YES																		YES
SNTG1	c1_3	c1_6	c1_17	c1_49		5	2.21789	0.0927985	c1_49	c1_17	c1_17	c1_1		YES			YES											YES
HERPUD1	c1_2	c1_5	c1_13		2	0.946445	0	NA	NA	c1_2	c1_1	YES			YES								YES
CAMK2D	c1_2	c1_4	c1_9	c1_27	c1_55		3	1.4105	1	c1_55	c1_4	c1_2	c1_1	YES		YES					YES																		YES
GJD2	c1_2	c1_5	c1_14	c1_38	c1_67		7	3.07701	0.352439	c1_67	c1_14	c1_2	c1_1	YES			YES									YES																							YES
KCNS2	c1_2	c1_5	c1_14	c1_38	c1_67		4	1.8416	0.509495	c1_67	c1_14	c1_2	c1_1	YES			YES									YES																							YES
MORN4	c1_3	c1_6	c1_15	c1_40		3	1.43094	1	c1_40	c1_40	c1_40	c1_1		YES			YES									YES
ADCY2	c1_3	c1_7	c1_20		3	1.3153	1	c1_20	c1_7	c1_7	c1_1		YES				YES													YES
LOC110481779	c1_2	c1_5	c1_14	c1_38	c1_67		4	1.8291	0.521974	c1_67	c1_14	c1_2	c1_1	YES			YES									YES																							YES
LOC110479464	c1_3	c1_6	c1_15	c1_42	c1_73		3	1.33241	0.670339	c1_73	c1_42	c1_42	c1_1		YES			YES									YES
NEK11	c1_3	c1_7	c1_19	c1_50		3	1.30093	0.299107	c1_50	c1_7	c1_7	c1_1		YES				YES												YES
TADA2A	c1_2	c1_5	c1_13		3	1.26969	0.347233	NA	NA	c1_2	c1_1	YES			YES								YES
SNX17	c1_3	c1_6	c1_15	c1_45		3	1.42622	0	c1_45	c1_45	c1_45	c1_1		YES			YES									YES
LOC110468493	c1_2	c1_5	c1_13	c1_35	c1_65		1	0.519302	NaN	c1_65	c1_35	c1_2	c1_1	YES			YES								YES																						YES
MAGI1	c1_2	c1_5	c1_13	c1_35	c1_66		3	1.29955	0.623709	c1_66	c1_35	c1_2	c1_1	YES			YES								YES																						YES
TRA2A	c1_2	c1_5	c1_14	c1_38	c1_67		2	0.859968	1	c1_67	c1_14	c1_2	c1_1	YES			YES									YES																							YES
PEX5L	c1_3	c1_6	c1_17	c1_49		4	1.90423	0.818869	c1_49	c1_17	c1_17	c1_1		YES			YES											YES
RPP21	c1_2	c1_4	c1_9	c1_33		3	1.44497	0.34547	c1_33	c1_4	c1_2	c1_1	YES		YES					YES																								YES
IMPA1	c1_2	c1_5	c1_14	c1_38	c1_67		3	1.30137	1	c1_67	c1_14	c1_2	c1_1	YES			YES									YES																							YES
LMAN2	c1_3	c1_6	c1_15	c1_46		5	2.15758	0.584996	c1_46	c1_46	c1_46	c1_1		YES			YES									YES
SVIL	c1_3	c1_6	c1_15	c1_40		3	1.34783	0.691666	c1_40	c1_40	c1_40	c1_1		YES			YES									YES
SH3BGRL	c1_2	c1_5	c1_13	c1_35	c1_65		3	1.33907	0.692565	c1_65	c1_35	c1_2	c1_1	YES			YES								YES																						YES
ASB16	c1_3	c1_6	c1_16		3	1.36379	0.344889	c1_16	c1_16	c1_16	c1_1		YES			YES										YES
TNRC6A	c1_2	c1_5	c1_13	c1_35	c1_65		5	2.22422	0.396187	c1_65	c1_35	c1_2	c1_1	YES			YES								YES																						YES
IBA57	c1_2	c1_5	c1_13	c1_35	c1_65		3	1.35994	1	c1_65	c1_35	c1_2	c1_1	YES			YES								YES																						YES
HIPK3	c1_2	c1_5	c1_13	c1_34	c1_60		3	1.34452	1	c1_60	c1_60	c1_2	c1_1	YES			YES								YES																					YES
RSPO2	c1_2	c1_5	c1_13	c1_34	c1_60		3	1.38668	0.345492	c1_60	c1_60	c1_2	c1_1	YES			YES								YES																					YES
LOC110471919	c1_3	c1_6	c1_15	c1_40		5	2.28898	0.394343	c1_40	c1_40	c1_40	c1_1		YES			YES									YES
FAH	c1_3	c1_6	c1_15	c1_40		3	1.41873	1	c1_40	c1_40	c1_40	c1_1		YES			YES									YES
SPAG1	c1_2	c1_4		1	0.511209	NaN	NA	c1_4	c1_2	c1_1	YES		YES
GPT2	c1_2	c1_5	c1_13	c1_35	c1_65		2	0.945712	1	c1_65	c1_35	c1_2	c1_1	YES			YES								YES																						YES
PROCA1	c1_2	c1_4	c1_9	c1_27	c1_55		2	0.902253	1	c1_55	c1_4	c1_2	c1_1	YES		YES					YES																		YES
OXA1L	c1_3	c1_6	c1_15	c1_40		3	1.26179	0.328679	c1_40	c1_40	c1_40	c1_1		YES			YES									YES
CLINT1	c1_2	c1_5	c1_13		5	2.0517	0.511456	NA	NA	c1_2	c1_1	YES			YES								YES
MCTP2	c1_2	c1_5	c1_14	c1_38	c1_71		3	1.34725	0.687465	c1_71	c1_14	c1_2	c1_1	YES			YES									YES																							YES
XKR6	c1_2	c1_4	c1_9	c1_29		2	0.984444	1	c1_29	c1_4	c1_2	c1_1	YES		YES					YES																				YES
LOC110484122	c1_2	c1_4	c1_9	c1_27	c1_59		1	0.504981	NaN	c1_59	c1_4	c1_2	c1_1	YES		YES					YES																		YES
RNF111	c1_3	c1_6	c1_17	c1_49		1	0.504748	NaN	c1_49	c1_17	c1_17	c1_1		YES			YES											YES
EPOR	c1_2	c1_5	c1_13		6	2.47998	0.263389	NA	NA	c1_2	c1_1	YES			YES								YES
LOC110474682	c1_3	c1_6	c1_15	c1_40		6	2.50016	0.260942	c1_40	c1_40	c1_40	c1_1		YES			YES									YES
LOC110472108	c1_3	c1_6	c1_15	c1_40		2	0.880384	1	c1_40	c1_40	c1_40	c1_1		YES			YES									YES
LZTFL1	c1_2	c1_4		7	2.90918	0.199258	NA	c1_4	c1_2	c1_1	YES		YES
PHF14	c1_3	c1_6	c1_15	c1_40		4	1.81426	0.687083	c1_40	c1_40	c1_40	c1_1		YES			YES									YES
NXNL1	c1_2	c1_5	c1_14	c1_38	c1_67		4	1.52488	0.700662	c1_67	c1_14	c1_2	c1_1	YES			YES									YES																							YES
LOC110481095	c1_3	c1_6	c1_15	c1_40		4	1.75191	0.685916	c1_40	c1_40	c1_40	c1_1		YES			YES									YES
KTN1	c1_3	c1_6	c1_15	c1_40		2	0.978429	1	c1_40	c1_40	c1_40	c1_1		YES			YES									YES
IQUB	c1_3	c1_6	c1_17	c1_47	c1_74		3	1.17366	1	c1_74	c1_17	c1_17	c1_1		YES			YES											YES
CDC42BPA	c1_3	c1_6	c1_16		1	0.502407	NaN	c1_16	c1_16	c1_16	c1_1		YES			YES										YES
BRS3	c1_3	c1_6	c1_15	c1_46		1	0.501713	NaN	c1_46	c1_46	c1_46	c1_1		YES			YES									YES
DISP1	c1_3	c1_6	c1_16		1	0.501572	NaN	c1_16	c1_16	c1_16	c1_1		YES			YES										YES
COL1A2	c1_3	c1_6	c1_17	c1_47	c1_74		2	0.933448	1	c1_74	c1_17	c1_17	c1_1		YES			YES											YES
AKAP10	c1_3	c1_7	c1_19	c1_50		3	1.46231	1	c1_50	c1_7	c1_7	c1_1		YES				YES												YES
LOC110484786	c1_3	c1_6	c1_15	c1_40		3	0.63755	0.752012	c1_40	c1_40	c1_40	c1_1		YES			YES									YES
PIN1	c1_2	c1_5	c1_13	c1_35	c1_66		2	0.961713	0	c1_66	c1_35	c1_2	c1_1	YES			YES								YES																						YES
SAP30L	c1_2	c1_5	c1_13	c1_35	c1_65		4	1.68365	0.840062	c1_65	c1_35	c1_2	c1_1	YES			YES								YES																						YES
HSPA2	c1_2	c1_5	c1_14	c1_38	c1_67		2	0.843707	1	c1_67	c1_14	c1_2	c1_1	YES			YES									YES																							YES
TP53BP1	c1_3	c1_6	c1_15	c1_40		3	1.42333	0.326099	c1_40	c1_40	c1_40	c1_1		YES			YES									YES
TMEM229B	c1_3	c1_6	c1_15	c1_40		1	0.494634	NaN	c1_40	c1_40	c1_40	c1_1		YES			YES									YES
MTCL1	c1_2	c1_5	c1_14	c1_38	c1_67		3	1.44147	1	c1_67	c1_14	c1_2	c1_1	YES			YES									YES																							YES
LOC116184014	c1_3	c1_6	c1_15	c1_40		2	0.892269	1	c1_40	c1_40	c1_40	c1_1		YES			YES									YES
HELLS	c1_3	c1_7	c1_20		3	1.3816	0.321221	c1_20	c1_7	c1_7	c1_1		YES				YES													YES
DUSP1	c1_2	c1_5	c1_13	c1_34	c1_60		3	1.18256	1	c1_60	c1_60	c1_2	c1_1	YES			YES								YES																					YES
LOC110469736	c1_2	c1_4	c1_9	c1_30		3	1.27828	0.349786	c1_30	c1_4	c1_2	c1_1	YES		YES					YES																					YES
NPM3	c1_2	c1_5	c1_13	c1_35	c1_65		2	0.917527	0	c1_65	c1_35	c1_2	c1_1	YES			YES								YES																						YES
SNRNP200	c1_2	c1_5	c1_13	c1_34	c1_61		2	0.876738	1	c1_61	c1_61	c1_2	c1_1	YES			YES								YES																					YES
LOC110480138	c1_3	c1_7	c1_20		3	1.29184	0.684686	c1_20	c1_7	c1_7	c1_1		YES				YES													YES
LOC110476475	c1_3	c1_6	c1_17	c1_49		3	1.16147	1	c1_49	c1_17	c1_17	c1_1		YES			YES											YES
SEC31B	c1_3	c1_6	c1_15	c1_40		3	1.18377	0.348516	c1_40	c1_40	c1_40	c1_1		YES			YES									YES
KCNH2	c1_3	c1_6	c1_15	c1_40		5	2.14569	0.406736	c1_40	c1_40	c1_40	c1_1		YES			YES									YES
LMO1	c1_3	c1_6	c1_15	c1_40		5	1.95954	0.424917	c1_40	c1_40	c1_40	c1_1		YES			YES									YES
PLXNB2	c1_3	c1_7	c1_19	c1_50		2	0.943681	1	c1_50	c1_7	c1_7	c1_1		YES				YES												YES
ING4	c1_2	c1_5	c1_13	c1_34	c1_61		2	0.921947	1	c1_61	c1_61	c1_2	c1_1	YES			YES								YES																					YES
ARMH4	c1_3	c1_6	c1_16		4	1.68995	0.169575	c1_16	c1_16	c1_16	c1_1		YES			YES										YES
STEAP2	c1_2	c1_5	c1_13	c1_35	c1_65		1	0.488937	NaN	c1_65	c1_35	c1_2	c1_1	YES			YES								YES																						YES
ZFP91	c1_2	c1_4	c1_9	c1_27	c1_54		1	0.487989	NaN	c1_54	c1_4	c1_2	c1_1	YES		YES					YES																		YES
SNAI2	c1_3	c1_8	c1_22		3	1.24204	0	c1_22	c1_8	c1_8	c1_1		YES					YES														YES
DDX24	c1_2	c1_5	c1_13	c1_35	c1_65		2	0.842748	1	c1_65	c1_35	c1_2	c1_1	YES			YES								YES																						YES
RNF144B	c1_3	c1_6	c1_17	c1_49		2	0.860611	0	c1_49	c1_17	c1_17	c1_1		YES			YES											YES
TRIB1	c1_2	c1_4	c1_9	c1_28		2	0.897877	1	c1_28	c1_4	c1_2	c1_1	YES		YES					YES																			YES
MYBBP1A	c1_2	c1_4	c1_12		4	1.53664	0.29839	c1_12	c1_4	c1_2	c1_1	YES		YES								YES
RAD50	c1_3	c1_7	c1_19	c1_50		5	2.17514	0.708329	c1_50	c1_7	c1_7	c1_1		YES				YES												YES
EXOC2	c1_3	c1_6	c1_15	c1_41		2	0.954538	0	c1_41	c1_41	c1_41	c1_1		YES			YES									YES
LOC110471859	c1_3	c1_6	c1_15	c1_40		3	1.30342	1	c1_40	c1_40	c1_40	c1_1		YES			YES									YES
FAM219B	c1_3	c1_7	c1_19	c1_50		3	1.15942	1	c1_50	c1_7	c1_7	c1_1		YES				YES												YES
CREBL2	c1_2	c1_5	c1_13		3	1.19747	1	NA	NA	c1_2	c1_1	YES			YES								YES
LOC110471335	c1_3	c1_6	c1_15	c1_40		3	1.1753	1	c1_40	c1_40	c1_40	c1_1		YES			YES									YES
LOC110473962	c1_3	c1_6	c1_15	c1_41		1	0.482812	NaN	c1_41	c1_41	c1_41	c1_1		YES			YES									YES
DHX36	c1_2	c1_4	c1_9	c1_27	c1_56	c1_79		1	0.482673	NaN	c1_79	c1_4	c1_2	c1_1	YES		YES					YES																		YES
C13H5orf15	c1_2	c1_4	c1_9	c1_27	c1_55		4	1.7567	0.159638	c1_55	c1_4	c1_2	c1_1	YES		YES					YES																		YES
TMEM200C	c1_3	c1_6	c1_15	c1_40		2	0.841381	0	c1_40	c1_40	c1_40	c1_1		YES			YES									YES
NFRKB	c1_2	c1_5	c1_14	c1_38	c1_67		1	0.481386	NaN	c1_67	c1_14	c1_2	c1_1	YES			YES									YES																							YES
PARVA	c1_3	c1_6	c1_15	c1_40		2	0.893796	0	c1_40	c1_40	c1_40	c1_1		YES			YES									YES
ZNF804B	c1_2	c1_5	c1_14	c1_39		4	1.73539	0.664488	c1_39	c1_14	c1_2	c1_1	YES			YES									YES																								YES
UBE2G2	c1_3	c1_6	c1_15	c1_40		1	0.479855	NaN	c1_40	c1_40	c1_40	c1_1		YES			YES									YES
FNIP1	c1_3	c1_7	c1_19	c1_50		3	1.35009	1	c1_50	c1_7	c1_7	c1_1		YES				YES												YES
ZHX1	c1_3	c1_6	c1_15	c1_40		4	1.61225	0.330617	c1_40	c1_40	c1_40	c1_1		YES			YES									YES
VPS51	c1_3	c1_6	c1_15	c1_40		3	1.17617	0.355518	c1_40	c1_40	c1_40	c1_1		YES			YES									YES
PGM1	c1_2	c1_5	c1_13	c1_34	c1_60		2	0.939473	0	c1_60	c1_60	c1_2	c1_1	YES			YES								YES																					YES
SNAPC2	c1_2	c1_5	c1_14	c1_38	c1_70	c1_70	3	1.22591	0.305477	c1_70	c1_14	c1_2	c1_1	YES			YES									YES																							YES
LRFN5	c1_2	c1_5	c1_14	c1_38	c1_67		1	0.476549	NaN	c1_67	c1_14	c1_2	c1_1	YES			YES									YES																							YES
TMEM170B	c1_2	c1_5	c1_13	c1_34	c1_60		3	1.16677	1	c1_60	c1_60	c1_2	c1_1	YES			YES								YES																					YES
FUT8	c1_3	c1_6	c1_15	c1_42		4	1.66952	0	NA	c1_42	c1_42	c1_1		YES			YES									YES
LDB2	c1_2	c1_5	c1_14	c1_38	c1_67		2	0.854276	1	c1_67	c1_14	c1_2	c1_1	YES			YES									YES																							YES
MPPED2	c1_2	c1_4	c1_9	c1_27	c1_55		3	1.28352	1	c1_55	c1_4	c1_2	c1_1	YES		YES					YES																		YES
WDR86	c1_2	c1_5	c1_13	c1_34	c1_60		1	0.475107	NaN	c1_60	c1_60	c1_2	c1_1	YES			YES								YES																					YES
TCERG1	c1_3	c1_7	c1_19	c1_50		6	2.43168	0.125615	c1_50	c1_7	c1_7	c1_1		YES				YES												YES
SSRP1	c1_3	c1_6	c1_15	c1_40		3	1.2938	0.321914	c1_40	c1_40	c1_40	c1_1		YES			YES									YES
DIO2	c1_2	c1_5	c1_14	c1_38	c1_67		3	1.16695	1	c1_67	c1_14	c1_2	c1_1	YES			YES									YES																							YES
HROB	c1_3	c1_6	c1_15	c1_45		3	1.22675	0.326996	c1_45	c1_45	c1_45	c1_1		YES			YES									YES
CRHR2	c1_3	c1_6	c1_16		3	1.25686	0	c1_16	c1_16	c1_16	c1_1		YES			YES										YES
RGS17	c1_2	c1_5	c1_14	c1_38	c1_68		3	1.23518	0.638016	c1_68	c1_14	c1_2	c1_1	YES			YES									YES																							YES
LGMN	c1_3	c1_6	c1_17	c1_49		2	0.883744	1	c1_49	c1_17	c1_17	c1_1		YES			YES											YES
KCNF1	c1_3	c1_8	c1_26		2	0.833909	0	c1_26	c1_8	c1_8	c1_1		YES					YES																		YES
PENK	c1_2	c1_4	c1_9	c1_33		4	1.66672	0.67572	c1_33	c1_4	c1_2	c1_1	YES		YES					YES																								YES
ANTXRL	c1_2	c1_4	c1_9	c1_27	c1_52		3	1.268	1	c1_52	c1_4	c1_2	c1_1	YES		YES					YES																		YES
ATMIN	c1_3	c1_6	c1_17	c1_47	c1_74		2	0.926848	0	c1_74	c1_17	c1_17	c1_1		YES			YES											YES
CLK2	c1_2	c1_5	c1_14	c1_38	c1_67		1	0.470325	NaN	c1_67	c1_14	c1_2	c1_1	YES			YES									YES																							YES
KAT6A	c1_3	c1_6	c1_15	c1_40		1	0.470311	NaN	c1_40	c1_40	c1_40	c1_1		YES			YES									YES
VMP1	c1_2	c1_5	c1_14	c1_38	c1_67		1	0.470208	NaN	c1_67	c1_14	c1_2	c1_1	YES			YES									YES																							YES
DIXDC1	c1_3	c1_6	c1_15		1	0.470141	NaN	NA	NA	NA	c1_1		YES			YES									YES
GPR68	c1_2	c1_5	c1_14	c1_38	c1_67		3	1.26945	0	c1_67	c1_14	c1_2	c1_1	YES			YES									YES																							YES
RAB12	c1_3	c1_7	c1_19	c1_50		4	1.60182	0.828869	c1_50	c1_7	c1_7	c1_1		YES				YES												YES
GPHN	c1_3	c1_6	c1_15	c1_40		2	0.88901	0	c1_40	c1_40	c1_40	c1_1		YES			YES									YES
LOC110470892	c1_3	c1_6	c1_15	c1_40		2	0.852003	0	c1_40	c1_40	c1_40	c1_1		YES			YES									YES
LOC110484798	c1_2	c1_5	c1_13	c1_35	c1_65		2	0.792939	1	c1_65	c1_35	c1_2	c1_1	YES			YES								YES																						YES
DGKB	c1_3	c1_6	c1_15	c1_40		2	0.815605	0	c1_40	c1_40	c1_40	c1_1		YES			YES									YES
LOC110475683	c1_3	c1_6	c1_16		1	0.467868	NaN	c1_16	c1_16	c1_16	c1_1		YES			YES										YES
ATXN3	c1_2	c1_5	c1_13	c1_34	c1_60		3	1.26258	1	c1_60	c1_60	c1_2	c1_1	YES			YES								YES																					YES
VIP	c1_3	c1_6	c1_17	c1_47	c1_74		5	2.06522	0.182143	c1_74	c1_17	c1_17	c1_1		YES			YES											YES
COL12A1	c1_3	c1_6	c1_18		2	0.832286	1	c1_18	c1_18	c1_18	c1_1		YES			YES												YES
PEBP4	c1_3	c1_6	c1_17	c1_47	c1_75		1	0.466802	NaN	c1_75	c1_17	c1_17	c1_1		YES			YES											YES
LOC116184316	c1_3	c1_6	c1_15	c1_40		1	0.466629	NaN	c1_40	c1_40	c1_40	c1_1		YES			YES									YES
POLE2	c1_3	c1_6	c1_15	c1_41		3	1.16855	0.699637	c1_41	c1_41	c1_41	c1_1		YES			YES									YES
NAPRT	c1_2	c1_4	c1_9	c1_33		5	1.89022	0.482184	c1_33	c1_4	c1_2	c1_1	YES		YES					YES																								YES
NR3C1	c1_3	c1_6	c1_17	c1_47	c1_77	c1_77	3	1.26583	0.684018	c1_77	c1_17	c1_17	c1_1		YES			YES											YES
RFC1	c1_3	c1_7	c1_19	c1_50		3	1.31691	0.3479	c1_50	c1_7	c1_7	c1_1		YES				YES												YES
LOC110481849	c1_2	c1_5	c1_14	c1_38	c1_67		3	1.24657	0.314979	c1_67	c1_14	c1_2	c1_1	YES			YES									YES																							YES
RPL19	c1_3	c1_6	c1_15	c1_40		2	0.8432	1	c1_40	c1_40	c1_40	c1_1		YES			YES									YES
SLC5A6	c1_3	c1_7	c1_19		3	1.28263	0	NA	c1_7	c1_7	c1_1		YES				YES												YES
URI1	c1_3	c1_7	c1_19	c1_50		2	0.873736	1	c1_50	c1_7	c1_7	c1_1		YES				YES												YES
SYT16	c1_3	c1_6	c1_15	c1_40		3	1.15674	1	c1_40	c1_40	c1_40	c1_1		YES			YES									YES
CLK4	c1_3	c1_6	c1_15	c1_40		3	1.27362	0.328689	c1_40	c1_40	c1_40	c1_1		YES			YES									YES
LOC116183805	c1_2	c1_5	c1_13	c1_37		1	0.463019	NaN	c1_37	c1_37	c1_2	c1_1	YES			YES								YES																							YES
FAXDC2	c1_3	c1_6	c1_16		4	1.7319	0.670369	c1_16	c1_16	c1_16	c1_1		YES			YES										YES
CCDC12	c1_3	c1_6	c1_15	c1_40		2	0.909	1	c1_40	c1_40	c1_40	c1_1		YES			YES									YES
WDR60	c1_3	c1_6	c1_16		2	0.784323	1	c1_16	c1_16	c1_16	c1_1		YES			YES										YES
DCAF8	c1_2	c1_4	c1_9	c1_27	c1_54		1	0.46198	NaN	c1_54	c1_4	c1_2	c1_1	YES		YES					YES																		YES
TXNL4A	c1_2	c1_5	c1_14	c1_38	c1_67		5	2.07186	0.196161	c1_67	c1_14	c1_2	c1_1	YES			YES									YES																							YES
LOC110473356	c1_3	c1_7	c1_19	c1_50		5	2.09882	0.500687	c1_50	c1_7	c1_7	c1_1		YES				YES												YES
LOC110481148	c1_2	c1_5	c1_13	c1_35	c1_65		1	0.461043	NaN	c1_65	c1_35	c1_2	c1_1	YES			YES								YES																						YES
GRN	c1_3	c1_6	c1_15	c1_41		2	0.895452	0	c1_41	c1_41	c1_41	c1_1		YES			YES									YES
POLR3C	c1_2	c1_4	c1_9	c1_28		1	0.460609	NaN	c1_28	c1_4	c1_2	c1_1	YES		YES					YES																			YES
NEUROD6	c1_3	c1_6	c1_15	c1_40		1	0.460223	NaN	c1_40	c1_40	c1_40	c1_1		YES			YES									YES
GJC1	c1_2	c1_4	c1_9	c1_33		5	2.14424	0.303041	c1_33	c1_4	c1_2	c1_1	YES		YES					YES																								YES
GFAP	c1_2	c1_4	c1_9	c1_27	c1_53		3	1.26691	0.318503	c1_53	c1_4	c1_2	c1_1	YES		YES					YES																		YES
LOC110470717	c1_2	c1_5	c1_13	c1_34	c1_60		1	0.459756	NaN	c1_60	c1_60	c1_2	c1_1	YES			YES								YES																					YES
LOC110471843	c1_3	c1_6	c1_15	c1_46		1	0.459625	NaN	c1_46	c1_46	c1_46	c1_1		YES			YES									YES
MRPS22	c1_2	c1_5	c1_14	c1_38	c1_67		2	0.831147	0	c1_67	c1_14	c1_2	c1_1	YES			YES									YES																							YES
CALCB	c1_3	c1_7	c1_20		3	1.17002	0.360644	c1_20	c1_7	c1_7	c1_1		YES				YES													YES
ACTA2	c1_3	c1_6	c1_15	c1_40		2	0.798733	1	c1_40	c1_40	c1_40	c1_1		YES			YES									YES
WARS1	c1_3	c1_7	c1_20		3	1.20581	0.672003	c1_20	c1_7	c1_7	c1_1		YES				YES													YES
RMDN2	c1_2	c1_5	c1_14	c1_38	c1_71		1	0.456832	NaN	c1_71	c1_14	c1_2	c1_1	YES			YES									YES																							YES
AGFG1	c1_2	c1_5	c1_13	c1_35	c1_65		3	1.2646	0.319431	c1_65	c1_35	c1_2	c1_1	YES			YES								YES																						YES
INPPL1	c1_2	c1_4	c1_12		1	0.455942	NaN	c1_12	c1_4	c1_2	c1_1	YES		YES								YES
LOC110484982	c1_3	c1_6	c1_17	c1_49		4	1.67097	0.159916	c1_49	c1_17	c1_17	c1_1		YES			YES											YES
SLC30A1	c1_2	c1_4	c1_9	c1_27	c1_52		2	0.823626	1	c1_52	c1_4	c1_2	c1_1	YES		YES					YES																		YES
LOC110481900	c1_3	c1_6	c1_15	c1_40		1	0.455183	NaN	c1_40	c1_40	c1_40	c1_1		YES			YES									YES
PPM1K	c1_3	c1_6	c1_15	c1_40		3	1.28213	0	c1_40	c1_40	c1_40	c1_1		YES			YES									YES
ATP13A2	c1_2	c1_5	c1_14	c1_38	c1_67		2	0.903566	0	c1_67	c1_14	c1_2	c1_1	YES			YES									YES																							YES
SLC17A5	c1_3	c1_6	c1_15	c1_40		1	0.454771	NaN	c1_40	c1_40	c1_40	c1_1		YES			YES									YES
PANK3	c1_3	c1_7	c1_19	c1_50		3	1.28526	0.676877	c1_50	c1_7	c1_7	c1_1		YES				YES												YES
PPARGC1A	c1_3	c1_6	c1_16		4	1.62319	0.339505	c1_16	c1_16	c1_16	c1_1		YES			YES										YES
TMX2	c1_3	c1_6	c1_15	c1_43		2	0.841083	1	c1_43	c1_43	c1_43	c1_1		YES			YES									YES
LOC110475701	c1_2	c1_5	c1_13		2	0.852378	1	NA	NA	c1_2	c1_1	YES			YES								YES
GTPBP8	c1_3	c1_6	c1_17	c1_47		1	0.454222	NaN	NA	c1_17	c1_17	c1_1		YES			YES											YES
CHD7	c1_2	c1_4	c1_9	c1_27	c1_55		1	0.453938	NaN	c1_55	c1_4	c1_2	c1_1	YES		YES					YES																		YES
SH2B2	c1_3	c1_6	c1_15	c1_40		2	0.852638	1	c1_40	c1_40	c1_40	c1_1		YES			YES									YES
STAC	c1_2	c1_5	c1_14	c1_38	c1_67		5	1.98675	0.405193	c1_67	c1_14	c1_2	c1_1	YES			YES									YES																							YES
MPST	c1_2	c1_5	c1_13	c1_35	c1_65		1	0.451483	NaN	c1_65	c1_35	c1_2	c1_1	YES			YES								YES																						YES
CCNDBP1	c1_3	c1_6	c1_15	c1_42		1	0.451161	NaN	NA	c1_42	c1_42	c1_1		YES			YES									YES
SPOCK1	c1_2	c1_5	c1_13	c1_35	c1_65		3	1.29323	1	c1_65	c1_35	c1_2	c1_1	YES			YES								YES																						YES
BAALC	c1_3	c1_8	c1_22		3	1.2131	0.650051	c1_22	c1_8	c1_8	c1_1		YES					YES														YES
PGAP1	c1_2	c1_4	c1_10		1	0.450118	NaN	c1_10	c1_4	c1_2	c1_1	YES		YES						YES
LOC110484437	c1_2	c1_5	c1_14	c1_38	c1_67		1	0.449402	NaN	c1_67	c1_14	c1_2	c1_1	YES			YES									YES																							YES
KCTD16	c1_3	c1_8	c1_22		6	2.36481	0.468035	c1_22	c1_8	c1_8	c1_1		YES					YES														YES
DUSP14	c1_3	c1_6	c1_15	c1_40		2	0.891298	0	c1_40	c1_40	c1_40	c1_1		YES			YES									YES
FNDC9	c1_2	c1_4	c1_9	c1_27		3	1.24212	0.659269	NA	c1_4	c1_2	c1_1	YES		YES					YES																		YES
ATXN7L3	c1_3	c1_7	c1_19	c1_50		2	0.857153	1	c1_50	c1_7	c1_7	c1_1		YES				YES												YES
GPRIN1	c1_2	c1_5	c1_13	c1_37		4	1.62833	0.499545	c1_37	c1_37	c1_2	c1_1	YES			YES								YES																							YES
SNX33	c1_3	c1_7	c1_19	c1_50		2	0.821746	1	c1_50	c1_7	c1_7	c1_1		YES				YES												YES
PTCD2	c1_2	c1_5	c1_14	c1_38	c1_67		2	0.842299	0	c1_67	c1_14	c1_2	c1_1	YES			YES									YES																							YES
PLPPR3	c1_3	c1_6	c1_15	c1_40		1	0.44542	NaN	c1_40	c1_40	c1_40	c1_1		YES			YES									YES
CHMP4C	c1_3	c1_6	c1_15	c1_40		1	0.445382	NaN	c1_40	c1_40	c1_40	c1_1		YES			YES									YES
YIPF4	c1_2	c1_5	c1_13	c1_34	c1_60		1	0.445254	NaN	c1_60	c1_60	c1_2	c1_1	YES			YES								YES																					YES
LOC110475699	c1_3	c1_6	c1_15	c1_40		4	1.62737	0.831824	c1_40	c1_40	c1_40	c1_1		YES			YES									YES
MIOS	c1_2	c1_5	c1_14	c1_38	c1_67		3	1.23255	0.65951	c1_67	c1_14	c1_2	c1_1	YES			YES									YES																							YES
PTDSS2	c1_3	c1_6	c1_15	c1_40		2	0.795929	1	c1_40	c1_40	c1_40	c1_1		YES			YES									YES
GSR	c1_2	c1_4	c1_9	c1_27	c1_55		1	0.444907	NaN	c1_55	c1_4	c1_2	c1_1	YES		YES					YES																		YES
KAT2A	c1_3	c1_6	c1_15	c1_41		3	1.15391	0	c1_41	c1_41	c1_41	c1_1		YES			YES									YES
EEF1E1	c1_3	c1_6	c1_15	c1_41		2	0.773219	0	c1_41	c1_41	c1_41	c1_1		YES			YES									YES
EGR1	c1_3	c1_8		2	0.835176	0	NA	c1_8	c1_8	c1_1		YES					YES
ADAM10	c1_2	c1_5	c1_14	c1_38	c1_67		1	0.444304	NaN	c1_67	c1_14	c1_2	c1_1	YES			YES									YES																							YES
NRG3	c1_3	c1_6	c1_15	c1_46		1	0.444265	NaN	c1_46	c1_46	c1_46	c1_1		YES			YES									YES
LOC110484532	c1_2	c1_5	c1_13	c1_35	c1_66		2	0.856529	0	c1_66	c1_35	c1_2	c1_1	YES			YES								YES																						YES
FAM8A1	c1_3	c1_6	c1_15	c1_40		3	1.09722	0.650632	c1_40	c1_40	c1_40	c1_1		YES			YES									YES
LOC116183328	c1_2	c1_5	c1_14	c1_38	c1_67		3	1.20757	1	c1_67	c1_14	c1_2	c1_1	YES			YES									YES																							YES
TSPOAP1	c1_3	c1_7	c1_19		1	0.443303	NaN	NA	c1_7	c1_7	c1_1		YES				YES												YES
DHX40	c1_3	c1_8	c1_25		1	0.442834	NaN	c1_25	c1_8	c1_8	c1_1		YES					YES																	YES
LOC110475992	c1_2	c1_5	c1_13	c1_34	c1_60		2	0.85236	1	c1_60	c1_60	c1_2	c1_1	YES			YES								YES																					YES
nbis-pseudo59	c1_3	c1_7	c1_20		2	0.796879	1	c1_20	c1_7	c1_7	c1_1		YES				YES													YES
RPL10	c1_2	c1_4	c1_10		1	0.442305	NaN	c1_10	c1_4	c1_2	c1_1	YES		YES						YES
HOXC13	c1_2	c1_5	c1_14	c1_38	c1_67		1	0.442254	NaN	c1_67	c1_14	c1_2	c1_1	YES			YES									YES																							YES
NTS	c1_3	c1_8	c1_26		1	0.442005	NaN	c1_26	c1_8	c1_8	c1_1		YES					YES																		YES
CBX4	c1_2	c1_4	c1_9	c1_30		1	0.441996	NaN	c1_30	c1_4	c1_2	c1_1	YES		YES					YES																					YES
AQP1	c1_3	c1_7	c1_19	c1_50		1	0.441982	NaN	c1_50	c1_7	c1_7	c1_1		YES				YES												YES
NETO1	c1_3	c1_6	c1_15	c1_40		1	0.441913	NaN	c1_40	c1_40	c1_40	c1_1		YES			YES									YES
CD74	c1_3	c1_6	c1_15	c1_41		3	1.22764	0	c1_41	c1_41	c1_41	c1_1		YES			YES									YES
NUP62CL	c1_2	c1_5	c1_14	c1_38	c1_67		1	0.440865	NaN	c1_67	c1_14	c1_2	c1_1	YES			YES									YES																							YES
LOC110483541	c1_2	c1_5	c1_14	c1_38	c1_69		1	0.440754	NaN	c1_69	c1_14	c1_2	c1_1	YES			YES									YES																							YES
UNC5C	c1_3	c1_8	c1_23		1	0.440235	NaN	c1_23	c1_8	c1_8	c1_1		YES					YES															YES
ANKRD29	c1_2	c1_4	c1_10		2	0.763498	0	c1_10	c1_4	c1_2	c1_1	YES		YES						YES
FADS1	c1_2	c1_5	c1_13	c1_34	c1_60		2	0.842776	1	c1_60	c1_60	c1_2	c1_1	YES			YES								YES																					YES
CHST15	c1_3	c1_7	c1_19	c1_50		1	0.440023	NaN	c1_50	c1_7	c1_7	c1_1		YES				YES												YES
DCAKD	c1_3	c1_7	c1_19		2	0.861329	0	NA	c1_7	c1_7	c1_1		YES				YES												YES
NID1	c1_3	c1_7	c1_19	c1_50		1	0.439578	NaN	c1_50	c1_7	c1_7	c1_1		YES				YES												YES
BEND3	c1_3	c1_6	c1_15	c1_40		1	0.439435	NaN	c1_40	c1_40	c1_40	c1_1		YES			YES									YES
GPLD1	c1_3	c1_6	c1_15	c1_40		3	1.28783	0.667399	c1_40	c1_40	c1_40	c1_1		YES			YES									YES
IFT80	c1_3	c1_7	c1_20		1	0.437847	NaN	c1_20	c1_7	c1_7	c1_1		YES				YES													YES
TSHZ1	c1_2	c1_5	c1_13	c1_34	c1_64		2	0.864242	1	c1_64	c1_64	c1_2	c1_1	YES			YES								YES																					YES
PLA2G12A	c1_3	c1_6	c1_17	c1_47		1	0.437378	NaN	NA	c1_17	c1_17	c1_1		YES			YES											YES
LOC110474508	c1_3	c1_6	c1_15	c1_40		6	2.24691	0.403323	c1_40	c1_40	c1_40	c1_1		YES			YES									YES
LOC110483201	c1_2	c1_5	c1_14	c1_38	c1_67		4	1.4982	0.840622	c1_67	c1_14	c1_2	c1_1	YES			YES									YES																							YES
SPDL1	c1_2	c1_5	c1_14	c1_38	c1_67		1	0.436729	NaN	c1_67	c1_14	c1_2	c1_1	YES			YES									YES																							YES
SBSPON	c1_3	c1_6	c1_15	c1_40		1	0.436624	NaN	c1_40	c1_40	c1_40	c1_1		YES			YES									YES
PIP4P2	c1_3	c1_6	c1_15	c1_42	c1_73		1	0.43646	NaN	c1_73	c1_42	c1_42	c1_1		YES			YES									YES
SMYD5	c1_3	c1_6	c1_15	c1_40		1	0.436153	NaN	c1_40	c1_40	c1_40	c1_1		YES			YES									YES
CACNA1H	c1_2	c1_5	c1_13	c1_34	c1_60		1	0.436071	NaN	c1_60	c1_60	c1_2	c1_1	YES			YES								YES																					YES
ADPRS	c1_2	c1_5	c1_13	c1_35	c1_65		2	0.864575	0	c1_65	c1_35	c1_2	c1_1	YES			YES								YES																						YES
TFRC	c1_2	c1_4	c1_9	c1_27	c1_58		1	0.435407	NaN	c1_58	c1_4	c1_2	c1_1	YES		YES					YES																		YES
LOC110480252	c1_3	c1_6	c1_15	c1_40		1	0.434906	NaN	c1_40	c1_40	c1_40	c1_1		YES			YES									YES
LOC110468712	c1_2	c1_5	c1_13	c1_34	c1_60		3	1.22041	0	c1_60	c1_60	c1_2	c1_1	YES			YES								YES																					YES
LPIN1	c1_2	c1_5	c1_13	c1_34	c1_63		2	0.805454	1	c1_63	c1_63	c1_2	c1_1	YES			YES								YES																					YES
AKT3	c1_2	c1_5	c1_14	c1_39		4	1.54733	0.328256	c1_39	c1_14	c1_2	c1_1	YES			YES									YES																								YES
SMIM32	c1_3	c1_6	c1_15	c1_40		1	0.433164	NaN	c1_40	c1_40	c1_40	c1_1		YES			YES									YES
SNCG	c1_2	c1_5	c1_13	c1_35	c1_65		2	0.862212	0	c1_65	c1_35	c1_2	c1_1	YES			YES								YES																						YES
XYLB	c1_2	c1_5	c1_13	c1_35	c1_65		1	0.431902	NaN	c1_65	c1_35	c1_2	c1_1	YES			YES								YES																						YES
IGFBP4	c1_3	c1_6	c1_17	c1_47	c1_76		2	0.800945	1	c1_76	c1_17	c1_17	c1_1		YES			YES											YES
TTC8	c1_2	c1_4	c1_9	c1_27	c1_57		4	1.66218	0.332745	c1_57	c1_4	c1_2	c1_1	YES		YES					YES																		YES
SEMA4B	c1_2	c1_5	c1_13	c1_35	c1_65		1	0.431171	NaN	c1_65	c1_35	c1_2	c1_1	YES			YES								YES																						YES
AFF4	c1_3	c1_7	c1_19		1	0.430967	NaN	NA	c1_7	c1_7	c1_1		YES				YES												YES
LOC116184451	c1_2	c1_4	c1_9	c1_29		1	0.430619	NaN	c1_29	c1_4	c1_2	c1_1	YES		YES					YES																				YES
TSTD3	c1_2	c1_4	c1_9	c1_27	c1_56	c1_78		1	0.430437	NaN	c1_78	c1_4	c1_2	c1_1	YES		YES					YES																		YES
NRBP2	c1_2	c1_5	c1_13	c1_34	c1_60		2	0.810896	1	c1_60	c1_60	c1_2	c1_1	YES			YES								YES																					YES
LMBRD1	c1_2	c1_4	c1_9	c1_27	c1_54		1	0.430117	NaN	c1_54	c1_4	c1_2	c1_1	YES		YES					YES																		YES
CDKN1B	c1_3	c1_6	c1_15	c1_40		1	0.429892	NaN	c1_40	c1_40	c1_40	c1_1		YES			YES									YES
PER3	c1_3	c1_6	c1_15	c1_40		1	0.429625	NaN	c1_40	c1_40	c1_40	c1_1		YES			YES									YES
LOC110482415	c1_3	c1_7	c1_19	c1_50		1	0.429194	NaN	c1_50	c1_7	c1_7	c1_1		YES				YES												YES
WNK1	c1_3	c1_7	c1_20		2	0.772033	1	c1_20	c1_7	c1_7	c1_1		YES				YES													YES
YIF1B	c1_2	c1_5	c1_13	c1_37		4	1.48337	0.663159	c1_37	c1_37	c1_2	c1_1	YES			YES								YES																							YES
LOC110467549	c1_3	c1_6	c1_15	c1_40		2	0.783448	1	c1_40	c1_40	c1_40	c1_1		YES			YES									YES
PLXDC2	c1_3	c1_6	c1_15	c1_46		1	0.428181	NaN	c1_46	c1_46	c1_46	c1_1		YES			YES									YES
KCNK9	c1_2	c1_5	c1_14	c1_38	c1_67		1	0.427648	NaN	c1_67	c1_14	c1_2	c1_1	YES			YES									YES																							YES
LOC110478305	c1_3	c1_6	c1_15	c1_40		1	0.426187	NaN	c1_40	c1_40	c1_40	c1_1		YES			YES									YES
PCSK6	c1_2	c1_5	c1_14	c1_38	c1_71		2	0.83846	0	c1_71	c1_14	c1_2	c1_1	YES			YES									YES																							YES
EXOSC6	c1_2	c1_4	c1_12		1	0.425984	NaN	c1_12	c1_4	c1_2	c1_1	YES		YES								YES
LOC110470065	c1_3	c1_6	c1_15	c1_43		1	0.425926	NaN	c1_43	c1_43	c1_43	c1_1		YES			YES									YES
EFHD1	c1_3	c1_6	c1_17	c1_49		2	0.799913	1	c1_49	c1_17	c1_17	c1_1		YES			YES											YES
TPST1	c1_3	c1_6	c1_16		2	0.750336	0	c1_16	c1_16	c1_16	c1_1		YES			YES										YES
LOC110482040	c1_3	c1_6	c1_16		1	0.424192	NaN	c1_16	c1_16	c1_16	c1_1		YES			YES										YES
RRBP1	c1_2	c1_4	c1_9	c1_27	c1_55		2	0.791501	1	c1_55	c1_4	c1_2	c1_1	YES		YES					YES																		YES
C10H15orf61	c1_2	c1_4	c1_9	c1_32		1	0.423714	NaN	c1_32	c1_4	c1_2	c1_1	YES		YES					YES																							YES
TRAPPC8	c1_3	c1_6	c1_17	c1_49		1	0.423584	NaN	c1_49	c1_17	c1_17	c1_1		YES			YES											YES
WDR20	c1_3	c1_6	c1_15	c1_40		2	0.802417	0	c1_40	c1_40	c1_40	c1_1		YES			YES									YES
RNF168	c1_2	c1_5	c1_13	c1_35	c1_65		1	0.422982	NaN	c1_65	c1_35	c1_2	c1_1	YES			YES								YES																						YES
KLHL20	c1_2	c1_5	c1_13	c1_35	c1_65		2	0.80676	1	c1_65	c1_35	c1_2	c1_1	YES			YES								YES																						YES
CLN5	c1_3	c1_6	c1_16		1	0.422348	NaN	c1_16	c1_16	c1_16	c1_1		YES			YES										YES
CAD	c1_3	c1_6	c1_15	c1_40		3	1.17529	0.320515	c1_40	c1_40	c1_40	c1_1		YES			YES									YES
HCFC2	c1_2	c1_4	c1_10		1	0.421611	NaN	c1_10	c1_4	c1_2	c1_1	YES		YES						YES
WDR37	c1_3	c1_6	c1_17	c1_49		3	1.2062	0	c1_49	c1_17	c1_17	c1_1		YES			YES											YES
FSTL4	c1_3	c1_6	c1_15	c1_42		1	0.421342	NaN	NA	c1_42	c1_42	c1_1		YES			YES									YES
CBLB	c1_2	c1_5	c1_13		1	0.420731	NaN	NA	NA	c1_2	c1_1	YES			YES								YES
KLHL11	c1_2	c1_4		2	0.743197	1	NA	c1_4	c1_2	c1_1	YES		YES
GLRX2	c1_3	c1_6	c1_15	c1_41		1	0.419886	NaN	c1_41	c1_41	c1_41	c1_1		YES			YES									YES
LOC110475823	c1_2	c1_5	c1_13	c1_35	c1_66		3	1.17836	0.651909	c1_66	c1_35	c1_2	c1_1	YES			YES								YES																						YES
BCHE	c1_3	c1_7	c1_19	c1_50		2	0.770573	0	c1_50	c1_7	c1_7	c1_1		YES				YES												YES
VAT1L	c1_2	c1_4	c1_9	c1_27	c1_56	c1_79		1	0.419573	NaN	c1_79	c1_4	c1_2	c1_1	YES		YES					YES																		YES
ANTXR2	c1_2	c1_4	c1_9	c1_31		1	0.418819	NaN	c1_31	c1_4	c1_2	c1_1	YES		YES					YES																						YES
TWF1	c1_2	c1_5	c1_14	c1_38	c1_67		1	0.418787	NaN	c1_67	c1_14	c1_2	c1_1	YES			YES									YES																							YES
TAFA2	c1_3	c1_7	c1_19	c1_50		2	0.8002	1	c1_50	c1_7	c1_7	c1_1		YES				YES												YES
LOC110471857	c1_2	c1_5	c1_13	c1_34	c1_60		2	0.805382	0	c1_60	c1_60	c1_2	c1_1	YES			YES								YES																					YES
CORIN	c1_3	c1_7	c1_19	c1_50		1	0.418246	NaN	c1_50	c1_7	c1_7	c1_1		YES				YES												YES
SACS	c1_2	c1_5	c1_13	c1_35	c1_66		1	0.417857	NaN	c1_66	c1_35	c1_2	c1_1	YES			YES								YES																						YES
PSMB3	c1_3	c1_6	c1_15	c1_41		2	0.834104	0	c1_41	c1_41	c1_41	c1_1		YES			YES									YES
LOC110469740	c1_3	c1_6	c1_15	c1_40		2	0.754742	1	c1_40	c1_40	c1_40	c1_1		YES			YES									YES
SEMA4G	c1_2	c1_5	c1_13	c1_34	c1_60		3	1.10239	1	c1_60	c1_60	c1_2	c1_1	YES			YES								YES																					YES
IL16	c1_3	c1_6	c1_15	c1_40		1	0.416803	NaN	c1_40	c1_40	c1_40	c1_1		YES			YES									YES
LOC110482417	c1_3	c1_6	c1_15	c1_41		1	0.416766	NaN	c1_41	c1_41	c1_41	c1_1		YES			YES									YES
LOC110481881	c1_2	c1_5	c1_13	c1_34	c1_60		2	0.80741	0	c1_60	c1_60	c1_2	c1_1	YES			YES								YES																					YES
GREM1	c1_3	c1_6	c1_15	c1_40		3	1.1295	0.315712	c1_40	c1_40	c1_40	c1_1		YES			YES									YES
ALPL	c1_3	c1_6		1	0.416166	NaN	NA	NA	NA	c1_1		YES			YES
LOC110481721	c1_3	c1_6	c1_15	c1_40		1	0.415923	NaN	c1_40	c1_40	c1_40	c1_1		YES			YES									YES
MARCHF11	c1_2	c1_4	c1_9	c1_27	c1_54		2	0.793525	0	c1_54	c1_4	c1_2	c1_1	YES		YES					YES																		YES
NSMCE2	c1_2	c1_4	c1_9	c1_27	c1_58		1	0.414393	NaN	c1_58	c1_4	c1_2	c1_1	YES		YES					YES																		YES
HDAC10	c1_3	c1_6	c1_15	c1_40		1	0.414255	NaN	c1_40	c1_40	c1_40	c1_1		YES			YES									YES
LOC116184735	c1_3	c1_6	c1_15	c1_40		2	0.742584	1	c1_40	c1_40	c1_40	c1_1		YES			YES									YES
LOC110481943	c1_3	c1_6	c1_15	c1_45		1	0.413448	NaN	c1_45	c1_45	c1_45	c1_1		YES			YES									YES
LOC110480732	c1_3	c1_6	c1_15	c1_40		1	0.413409	NaN	c1_40	c1_40	c1_40	c1_1		YES			YES									YES
MRPL10	c1_3	c1_6	c1_15	c1_40		1	0.413361	NaN	c1_40	c1_40	c1_40	c1_1		YES			YES									YES
LOC116183224	c1_3	c1_6	c1_15	c1_40		1	0.413233	NaN	c1_40	c1_40	c1_40	c1_1		YES			YES									YES
ADAMTS17	c1_3	c1_6	c1_16		1	0.412685	NaN	c1_16	c1_16	c1_16	c1_1		YES			YES										YES
LOC110473273	c1_3	c1_6	c1_15	c1_40		1	0.411926	NaN	c1_40	c1_40	c1_40	c1_1		YES			YES									YES
HOOK1	c1_3	c1_7	c1_19	c1_50		1	0.411652	NaN	c1_50	c1_7	c1_7	c1_1		YES				YES												YES
ITIH5	c1_3	c1_6	c1_15		1	0.411082	NaN	NA	NA	NA	c1_1		YES			YES									YES
C5H15orf41	c1_3	c1_7	c1_19	c1_50		3	1.11487	0.315853	c1_50	c1_7	c1_7	c1_1		YES				YES												YES
PLA2G15	c1_3	c1_6	c1_15	c1_40		2	0.755288	1	c1_40	c1_40	c1_40	c1_1		YES			YES									YES
MAP3K13	c1_3	c1_6	c1_16		2	0.77888	1	c1_16	c1_16	c1_16	c1_1		YES			YES										YES
LOC110483620	c1_3	c1_6	c1_15	c1_40		1	0.408815	NaN	c1_40	c1_40	c1_40	c1_1		YES			YES									YES
RSPRY1	c1_3	c1_6	c1_15	c1_44		1	0.408398	NaN	c1_44	c1_44	c1_44	c1_1		YES			YES									YES
FRS2	c1_2	c1_5	c1_14	c1_39		1	0.407661	NaN	c1_39	c1_14	c1_2	c1_1	YES			YES									YES																								YES
NUDT14	c1_3	c1_6	c1_17	c1_49		1	0.407575	NaN	c1_49	c1_17	c1_17	c1_1		YES			YES											YES
MRPL52	c1_3	c1_6	c1_15	c1_40		1	0.407564	NaN	c1_40	c1_40	c1_40	c1_1		YES			YES									YES
LACTB	c1_2	c1_5	c1_14	c1_38	c1_67		1	0.406799	NaN	c1_67	c1_14	c1_2	c1_1	YES			YES									YES																							YES
TCIRG1	c1_2	c1_4	c1_9	c1_33		1	0.406129	NaN	c1_33	c1_4	c1_2	c1_1	YES		YES					YES																								YES
SLC25A36	c1_2	c1_5	c1_13	c1_34	c1_60		2	0.727479	1	c1_60	c1_60	c1_2	c1_1	YES			YES								YES																					YES
SCFD2	c1_2	c1_5	c1_14	c1_38	c1_69		2	0.79967	1	c1_69	c1_14	c1_2	c1_1	YES			YES									YES																							YES
TRIR	c1_3	c1_6	c1_15	c1_40		3	1.20363	0.332418	c1_40	c1_40	c1_40	c1_1		YES			YES									YES
ACADVL	c1_3	c1_6	c1_15	c1_41		1	0.40414	NaN	c1_41	c1_41	c1_41	c1_1		YES			YES									YES
BEND2	c1_3	c1_6	c1_15	c1_40		1	0.402912	NaN	c1_40	c1_40	c1_40	c1_1		YES			YES									YES
AFAP1L1	c1_3	c1_7	c1_20		2	0.754731	0	c1_20	c1_7	c1_7	c1_1		YES				YES													YES
CMBL	c1_3	c1_7	c1_19	c1_50		1	0.402303	NaN	c1_50	c1_7	c1_7	c1_1		YES				YES												YES
STING1	c1_3	c1_7	c1_19	c1_50		1	0.401956	NaN	c1_50	c1_7	c1_7	c1_1		YES				YES												YES
CS	c1_3	c1_6	c1_16		1	0.401665	NaN	c1_16	c1_16	c1_16	c1_1		YES			YES										YES
CTDP1	c1_3	c1_7	c1_20		1	0.401426	NaN	c1_20	c1_7	c1_7	c1_1		YES				YES													YES
DFFB	c1_2	c1_5	c1_13	c1_35	c1_65		1	0.400722	NaN	c1_65	c1_35	c1_2	c1_1	YES			YES								YES																						YES
TRIM25	c1_2	c1_5	c1_14	c1_39		1	0.399767	NaN	c1_39	c1_14	c1_2	c1_1	YES			YES									YES																								YES
LONP2	c1_3	c1_7	c1_20		1	0.399624	NaN	c1_20	c1_7	c1_7	c1_1		YES				YES													YES
CSMD3	c1_3	c1_8	c1_26		1	0.399479	NaN	c1_26	c1_8	c1_8	c1_1		YES					YES																		YES
ZBTB2	c1_2	c1_5	c1_13	c1_35	c1_65		1	0.398558	NaN	c1_65	c1_35	c1_2	c1_1	YES			YES								YES																						YES
SPPL2A	c1_3	c1_6	c1_17	c1_49		2	0.750472	1	c1_49	c1_17	c1_17	c1_1		YES			YES											YES
PIGH	c1_2	c1_5	c1_14	c1_38	c1_67		1	0.398086	NaN	c1_67	c1_14	c1_2	c1_1	YES			YES									YES																							YES
ABCF3	c1_2	c1_5	c1_13		1	0.397873	NaN	NA	NA	c1_2	c1_1	YES			YES								YES
UNC13C	c1_3	c1_8	c1_24		2	0.724565	1	c1_24	c1_8	c1_8	c1_1		YES					YES																YES
ARHGEF5	c1_2	c1_4	c1_9	c1_27	c1_55		1	0.394741	NaN	c1_55	c1_4	c1_2	c1_1	YES		YES					YES																		YES
KCNG2	c1_2	c1_5	c1_13	c1_35	c1_65		1	0.394274	NaN	c1_65	c1_35	c1_2	c1_1	YES			YES								YES																						YES
LOC110481185	c1_2	c1_5	c1_14	c1_38	c1_67		1	0.393846	NaN	c1_67	c1_14	c1_2	c1_1	YES			YES									YES																							YES
[truncated: 40 more rows]
[truncated: 41 more columns]

## Sheet: LMAN
id	module.membership	KD.membership	node.degree	node.strength	node.weightedCF	S1(min.alpha=0.25)	S1(max.alpha=0.73)	S2(min.alpha=0.74)	S2(max.alpha=0.85)	S3(min.alpha=0.87)	S3(max.alpha=0.94)	S4(min.alpha=0.99)	S4(max.alpha=1.04)	S5(min.alpha=1.07)	S5(max.alpha=1.17)	S6(min.alpha=1.27)	S6(max.alpha=1.3)	S7(min.alpha=1.53)	S7(max.alpha=2.56)	S8(min.alpha=3.18)	S8(max.alpha=Inf)	c1_2	c1_3	c1_4	c1_5	c1_6	c1_7	c1_8	c1_9	c1_10	c1_11	c1_12	c1_13	c1_14	c1_15	c1_16	c1_17	c1_18	c1_19	c1_20	c1_21	c1_22	c1_23	c1_24	c1_25	c1_26	c1_27	c1_28	c1_29
[truncated: 1,997 more rows]
[truncated: 41 more columns]

[truncated: 1 more sheets: Area X]
