# Supplementary material for: Neural circuit-wide analysis of gene expression during deafening-induced destabilization of birdsong
Source: bioRxiv preprint, doi:10.1101/2022.12.13.520194, version 1 (2022-12-14)
Supplement: Supplemental Table 5 [file 520194_file06.xlsx]

## Sheet: Full dataset correlations
gene_id	Var1	Var2	value	value_mean	value_q01	value_q025	value_q05	value_q90	value_q95	value_q975	value_q99	var1_var2
AACS	hvc	ra	0.707507	-0.00796831	-0.519392	-0.435765	-0.377065	0.307747	0.347469	0.461298	0.570656	hvc_ra
AACS	hvc	arco	0.444162	-0.0310064	-0.503197	-0.447687	-0.347473	0.252111	0.315641	0.373967	0.394189	hvc_arco
AACS	ncl	arco	0.641877	0.0288523	-0.411373	-0.386436	-0.355656	0.312156	0.387642	0.425013	0.510104	ncl_arco
AACS	nido	arco	0.564078	-0.0193765	-0.441364	-0.415154	-0.396316	0.292184	0.42343	0.491578	0.550047	nido_arco
AACS	stri	arco	0.712956	-0.00929401	-0.580879	-0.4481	-0.376687	0.35209	0.365789	0.501914	0.57112	stri_arco
AACS	ra	hvc	0.707507	-0.00796831	-0.519392	-0.435765	-0.377065	0.307747	0.347469	0.461298	0.570656	ra_hvc
AACS	arco	hvc	0.444162	-0.0310064	-0.503197	-0.447687	-0.347473	0.252111	0.315641	0.373967	0.394189	arco_hvc
AACS	arco	ncl	0.641877	0.0288523	-0.411373	-0.386436	-0.355656	0.312156	0.387642	0.425013	0.510104	arco_ncl
AACS	stri	ncl	0.492251	-0.00653526	-0.456979	-0.417096	-0.366783	0.277065	0.336829	0.366139	0.442184	stri_ncl
AACS	arco	nido	0.564078	-0.0193765	-0.441364	-0.415154	-0.396316	0.292184	0.42343	0.491578	0.550047	arco_nido
AACS	arco	stri	0.712956	-0.00929401	-0.580879	-0.4481	-0.376687	0.35209	0.365789	0.501914	0.57112	arco_stri
AACS	ncl	stri	0.492251	-0.00653526	-0.456979	-0.417096	-0.366783	0.277065	0.336829	0.366139	0.442184	ncl_stri
AAD-A	arco	ra	0.528466	0.0227025	-0.476799	-0.42039	-0.382398	0.295051	0.436607	0.493337	0.524284	arco_ra
AAD-A	ncl	ra	0.629339	-0.00319231	-0.553837	-0.469764	-0.44734	0.271373	0.382193	0.52052	0.555217	ncl_ra
AAD-A	lman	ra	0.460961	-0.00901415	-0.584223	-0.513305	-0.483034	0.322328	0.363704	0.410306	0.421348	lman_ra
AAD-A	stri	ra	0.455464	0.00201019	-0.572672	-0.488797	-0.392988	0.308067	0.355709	0.40332	0.410159	stri_ra
AAD-A	ra	arco	0.528466	0.0227025	-0.476799	-0.42039	-0.382398	0.295051	0.436607	0.493337	0.524284	ra_arco
AAD-A	stri	arco	0.54637	-0.0110711	-0.479648	-0.44105	-0.399525	0.308615	0.392739	0.442258	0.507602	stri_arco
AAD-A	ra	ncl	0.629339	-0.00319231	-0.553837	-0.469764	-0.44734	0.271373	0.382193	0.52052	0.555217	ra_ncl
AAD-A	ra	lman	0.460961	-0.00901415	-0.584223	-0.513305	-0.483034	0.322328	0.363704	0.410306	0.421348	ra_lman
AAD-A	nido	lman	0.507499	-0.014075	-0.565613	-0.400126	-0.39219	0.295678	0.352296	0.386684	0.479477	nido_lman
AAD-A	x	lman	0.630713	-0.0424404	-0.580711	-0.528826	-0.475134	0.262096	0.406125	0.451393	0.505731	x_lman
AAD-A	lman	nido	0.507499	-0.014075	-0.565613	-0.400126	-0.39219	0.295678	0.352296	0.386684	0.479477	lman_nido
AAD-A	lman	x	0.630713	-0.0424404	-0.580711	-0.528826	-0.475134	0.262096	0.406125	0.451393	0.505731	lman_x
AAD-A	stri	x	0.513986	-0.0180092	-0.484756	-0.452348	-0.401423	0.25569	0.360203	0.401483	0.501719	stri_x
AAD-A	ra	stri	0.455464	0.00201019	-0.572672	-0.488797	-0.392988	0.308067	0.355709	0.40332	0.410159	ra_stri
AAD-A	arco	stri	0.54637	-0.0110711	-0.479648	-0.44105	-0.399525	0.308615	0.392739	0.442258	0.507602	arco_stri
AAD-A	x	stri	0.513986	-0.0180092	-0.484756	-0.452348	-0.401423	0.25569	0.360203	0.401483	0.501719	x_stri
AASDH	hvc	ra	0.480198	-0.0200512	-0.490799	-0.474142	-0.444854	0.255923	0.313928	0.409583	0.461158	hvc_ra
AASDH	nido	ra	0.509624	0.0124913	-0.549277	-0.504271	-0.437765	0.357041	0.432124	0.460801	0.47672	nido_ra
AASDH	x	ra	0.585046	0.000376391	-0.469828	-0.401091	-0.365096	0.302611	0.381309	0.463403	0.487608	x_ra
AASDH	stri	ra	0.529973	0.0146271	-0.51732	-0.497977	-0.428137	0.364371	0.427928	0.455876	0.509003	stri_ra
AASDH	stri	arco	0.553585	0.00602342	-0.425361	-0.369382	-0.316381	0.286471	0.37231	0.421397	0.4477	stri_arco
AASDH	ra	hvc	0.480198	-0.0200512	-0.490799	-0.474142	-0.444854	0.255923	0.313928	0.409583	0.461158	ra_hvc
AASDH	ncl	hvc	0.564095	0.00773014	-0.509831	-0.471353	-0.399097	0.270921	0.411199	0.506133	0.509762	ncl_hvc
AASDH	hvc	ncl	0.564095	0.00773014	-0.509831	-0.471353	-0.399097	0.270921	0.411199	0.506133	0.509762	hvc_ncl
AASDH	x	ncl	0.579244	0.0176919	-0.535546	-0.485091	-0.447437	0.360899	0.409859	0.474874	0.500219	x_ncl
AASDH	stri	ncl	0.617381	0.00111355	-0.472082	-0.43394	-0.357439	0.3086	0.454428	0.521333	0.582579	stri_ncl
AASDH	ra	nido	0.509624	0.0124913	-0.549277	-0.504271	-0.437765	0.357041	0.432124	0.460801	0.47672	ra_nido
AASDH	ra	x	0.585046	0.000376391	-0.469828	-0.401091	-0.365096	0.302611	0.381309	0.463403	0.487608	ra_x
AASDH	ncl	x	0.579244	0.0176919	-0.535546	-0.485091	-0.447437	0.360899	0.409859	0.474874	0.500219	ncl_x
AASDH	stri	x	0.637145	-0.0455437	-0.576685	-0.512543	-0.433725	0.234714	0.281312	0.3131	0.360271	stri_x
AASDH	ra	stri	0.529973	0.0146271	-0.51732	-0.497977	-0.428137	0.364371	0.427928	0.455876	0.509003	ra_stri
AASDH	arco	stri	0.553585	0.00602342	-0.425361	-0.369382	-0.316381	0.286471	0.37231	0.421397	0.4477	arco_stri
AASDH	ncl	stri	0.617381	0.00111355	-0.472082	-0.43394	-0.357439	0.3086	0.454428	0.521333	0.582579	ncl_stri
AASDH	x	stri	0.637145	-0.0455437	-0.576685	-0.512543	-0.433725	0.234714	0.281312	0.3131	0.360271	x_stri
ABCA1	nido	lman	0.614124	-0.00286748	-0.385108	-0.363248	-0.319904	0.344406	0.422463	0.476136	0.555551	nido_lman
ABCA1	lman	nido	0.614124	-0.00286748	-0.385108	-0.363248	-0.319904	0.344406	0.422463	0.476136	0.555551	lman_nido
ABCC8	nido	ra	0.620598	-0.00545068	-0.474845	-0.433022	-0.377737	0.253316	0.293176	0.405126	0.538361	nido_ra
ABCC8	nido	hvc	0.603929	0.0358717	-0.439145	-0.386747	-0.3273	0.343947	0.451396	0.476963	0.54512	nido_hvc
ABCC8	lman	ncl	0.557057	-0.00573733	-0.553735	-0.515373	-0.467762	0.241814	0.397878	0.470079	0.499962	lman_ncl
ABCC8	nido	ncl	0.580038	-0.00263433	-0.581445	-0.530645	-0.523667	0.393535	0.460267	0.515121	0.541569	nido_ncl
ABCC8	ncl	lman	0.557057	-0.00573733	-0.553735	-0.515373	-0.467762	0.241814	0.397878	0.470079	0.499962	ncl_lman
ABCC8	stri	lman	0.565245	-0.0114865	-0.43877	-0.427124	-0.385541	0.293789	0.372159	0.401259	0.413245	stri_lman
ABCC8	ra	nido	0.620598	-0.00545068	-0.474845	-0.433022	-0.377737	0.253316	0.293176	0.405126	0.538361	ra_nido
ABCC8	hvc	nido	0.603929	0.0358717	-0.439145	-0.386747	-0.3273	0.343947	0.451396	0.476963	0.54512	hvc_nido
ABCC8	ncl	nido	0.580038	-0.00263433	-0.581445	-0.530645	-0.523667	0.393535	0.460267	0.515121	0.541569	ncl_nido
ABCC8	stri	nido	0.672605	-0.0135022	-0.557458	-0.529539	-0.419987	0.28383	0.363623	0.384635	0.441037	stri_nido
ABCC8	stri	x	0.453199	0.0379253	-0.474716	-0.418908	-0.389201	0.322447	0.368066	0.401492	0.40696	stri_x
ABCC8	lman	stri	0.565245	-0.0114865	-0.43877	-0.427124	-0.385541	0.293789	0.372159	0.401259	0.413245	lman_stri
ABCC8	nido	stri	0.672605	-0.0135022	-0.557458	-0.529539	-0.419987	0.28383	0.363623	0.384635	0.441037	nido_stri
ABCC8	x	stri	0.453199	0.0379253	-0.474716	-0.418908	-0.389201	0.322447	0.368066	0.401492	0.40696	x_stri
ABHD11	lman	ra	0.702405	0.0241579	-0.418762	-0.410658	-0.339254	0.35212	0.396049	0.439751	0.497966	lman_ra
ABHD11	nido	arco	0.546249	0.0293474	-0.446157	-0.408443	-0.369973	0.335124	0.386626	0.435842	0.516391	nido_arco
ABHD11	ra	lman	0.702405	0.0241579	-0.418762	-0.410658	-0.339254	0.35212	0.396049	0.439751	0.497966	ra_lman
ABHD11	arco	nido	0.546249	0.0293474	-0.446157	-0.408443	-0.369973	0.335124	0.386626	0.435842	0.516391	arco_nido
ABHD13	stri	arco	0.476109	-0.0259782	-0.468842	-0.413538	-0.374606	0.244118	0.292267	0.351109	0.380509	stri_arco
ABHD13	nido	lman	0.437542	-0.00697887	-0.459672	-0.397553	-0.350985	0.300129	0.383187	0.411206	0.432453	nido_lman
ABHD13	lman	nido	0.437542	-0.00697887	-0.459672	-0.397553	-0.350985	0.300129	0.383187	0.411206	0.432453	lman_nido
ABHD13	arco	stri	0.476109	-0.0259782	-0.468842	-0.413538	-0.374606	0.244118	0.292267	0.351109	0.380509	arco_stri
ABHD14A	arco	ra	0.484671	-0.0516552	-0.528971	-0.480927	-0.409196	0.235402	0.28913	0.319566	0.37984	arco_ra
ABHD14A	lman	ra	0.470637	0.00304962	-0.449398	-0.421786	-0.401451	0.286943	0.35704	0.399752	0.437235	lman_ra
ABHD14A	nido	ra	0.514032	0.00621953	-0.443479	-0.400268	-0.369063	0.301774	0.442642	0.479643	0.489924	nido_ra
ABHD14A	stri	ra	0.46875	-0.0216625	-0.605847	-0.46784	-0.375966	0.291564	0.378326	0.415916	0.452214	stri_ra
ABHD14A	ra	arco	0.484671	-0.0516552	-0.528971	-0.480927	-0.409196	0.235402	0.28913	0.319566	0.37984	ra_arco
ABHD14A	ncl	arco	0.621475	0.00433131	-0.487217	-0.409913	-0.383091	0.342317	0.376854	0.427117	0.443523	ncl_arco
ABHD14A	nido	arco	0.527989	-0.0466515	-0.515672	-0.484244	-0.420582	0.219744	0.360576	0.391642	0.456114	nido_arco
ABHD14A	x	arco	0.694428	-0.00359537	-0.564339	-0.525865	-0.407366	0.394356	0.454017	0.500361	0.527779	x_arco
ABHD14A	stri	arco	0.710271	0.0277122	-0.443532	-0.433708	-0.413799	0.384168	0.429244	0.475565	0.502151	stri_arco
ABHD14A	lman	hvc	0.617697	-0.00443412	-0.631001	-0.54243	-0.440697	0.303213	0.435592	0.511669	0.547422	lman_hvc
ABHD14A	nido	hvc	0.764053	-0.0368321	-0.502453	-0.455319	-0.384353	0.313881	0.362045	0.389725	0.405448	nido_hvc
ABHD14A	x	hvc	0.63245	-0.0340226	-0.529265	-0.476084	-0.406744	0.241436	0.340102	0.427138	0.461371	x_hvc
ABHD14A	stri	hvc	0.456327	0.0144323	-0.479796	-0.46413	-0.376591	0.264413	0.304358	0.416237	0.439575	stri_hvc
ABHD14A	arco	ncl	0.621475	0.00433131	-0.487217	-0.409913	-0.383091	0.342317	0.376854	0.427117	0.443523	arco_ncl
ABHD14A	ra	lman	0.470637	0.00304962	-0.449398	-0.421786	-0.401451	0.286943	0.35704	0.399752	0.437235	ra_lman
ABHD14A	hvc	lman	0.617697	-0.00443412	-0.631001	-0.54243	-0.440697	0.303213	0.435592	0.511669	0.547422	hvc_lman
ABHD14A	nido	lman	0.746953	0.0388606	-0.521656	-0.386684	-0.313365	0.293965	0.392833	0.454486	0.491144	nido_lman
ABHD14A	x	lman	0.473464	-0.0133741	-0.423024	-0.402312	-0.364641	0.304145	0.355032	0.402185	0.437436	x_lman
ABHD14A	stri	lman	0.596995	0.0190877	-0.531944	-0.467208	-0.371263	0.381177	0.434276	0.457418	0.506123	stri_lman
ABHD14A	ra	nido	0.514032	0.00621953	-0.443479	-0.400268	-0.369063	0.301774	0.442642	0.479643	0.489924	ra_nido
ABHD14A	arco	nido	0.527989	-0.0466515	-0.515672	-0.484244	-0.420582	0.219744	0.360576	0.391642	0.456114	arco_nido
ABHD14A	hvc	nido	0.764053	-0.0368321	-0.502453	-0.455319	-0.384353	0.313881	0.362045	0.389725	0.405448	hvc_nido
ABHD14A	lman	nido	0.746953	0.0388606	-0.521656	-0.386684	-0.313365	0.293965	0.392833	0.454486	0.491144	lman_nido
ABHD14A	stri	nido	0.597242	0.0075502	-0.477586	-0.413625	-0.366131	0.326952	0.4185	0.438045	0.443115	stri_nido
ABHD14A	arco	x	0.694428	-0.00359537	-0.564339	-0.525865	-0.407366	0.394356	0.454017	0.500361	0.527779	arco_x
ABHD14A	hvc	x	0.63245	-0.0340226	-0.529265	-0.476084	-0.406744	0.241436	0.340102	0.427138	0.461371	hvc_x
ABHD14A	lman	x	0.473464	-0.0133741	-0.423024	-0.402312	-0.364641	0.304145	0.355032	0.402185	0.437436	lman_x
ABHD14A	stri	x	0.593273	0.0245943	-0.459284	-0.418996	-0.346512	0.330883	0.426793	0.514106	0.525115	stri_x
ABHD14A	ra	stri	0.46875	-0.0216625	-0.605847	-0.46784	-0.375966	0.291564	0.378326	0.415916	0.452214	ra_stri
ABHD14A	arco	stri	0.710271	0.0277122	-0.443532	-0.433708	-0.413799	0.384168	0.429244	0.475565	0.502151	arco_stri
ABHD14A	hvc	stri	0.456327	0.0144323	-0.479796	-0.46413	-0.376591	0.264413	0.304358	0.416237	0.439575	hvc_stri
ABHD14A	lman	stri	0.596995	0.0190877	-0.531944	-0.467208	-0.371263	0.381177	0.434276	0.457418	0.506123	lman_stri
ABHD14A	nido	stri	0.597242	0.0075502	-0.477586	-0.413625	-0.366131	0.326952	0.4185	0.438045	0.443115	nido_stri
ABHD14A	x	stri	0.593273	0.0245943	-0.459284	-0.418996	-0.346512	0.330883	0.426793	0.514106	0.525115	x_stri
ABHD2	hvc	ra	0.556691	0.0355009	-0.470015	-0.405895	-0.370088	0.355932	0.456804	0.48726	0.546418	hvc_ra
ABHD2	stri	arco	0.703353	0.0562412	-0.522251	-0.469521	-0.353405	0.387883	0.442792	0.501641	0.549736	stri_arco
ABHD2	ra	hvc	0.556691	0.0355009	-0.470015	-0.405895	-0.370088	0.355932	0.456804	0.48726	0.546418	ra_hvc
ABHD2	stri	lman	0.598167	-0.027732	-0.616707	-0.474048	-0.371319	0.237887	0.266071	0.303585	0.405926	stri_lman
ABHD2	arco	stri	0.703353	0.0562412	-0.522251	-0.469521	-0.353405	0.387883	0.442792	0.501641	0.549736	arco_stri
ABHD2	lman	stri	0.598167	-0.027732	-0.616707	-0.474048	-0.371319	0.237887	0.266071	0.303585	0.405926	lman_stri
ABL1	arco	ra	0.60542	0.0183282	-0.450546	-0.442417	-0.362507	0.297085	0.348977	0.402538	0.462215	arco_ra
ABL1	ra	arco	0.60542	0.0183282	-0.450546	-0.442417	-0.362507	0.297085	0.348977	0.402538	0.462215	ra_arco
ABL1	nido	hvc	-0.734138	-0.0107564	-0.455069	-0.418708	-0.376963	0.289386	0.375568	0.427356	0.459401	nido_hvc
ABL1	x	lman	0.70497	-0.00849539	-0.578794	-0.508018	-0.394602	0.26226	0.359787	0.580297	0.632473	x_lman
ABL1	hvc	nido	-0.734138	-0.0107564	-0.455069	-0.418708	-0.376963	0.289386	0.375568	0.427356	0.459401	hvc_nido
ABL1	lman	x	0.70497	-0.00849539	-0.578794	-0.508018	-0.394602	0.26226	0.359787	0.580297	0.632473	lman_x
ABTB1	hvc	ra	0.610374	0.0223592	-0.517673	-0.475917	-0.399562	0.381561	0.492196	0.546785	0.578609	hvc_ra
ABTB1	lman	ra	0.590626	-0.0366367	-0.480054	-0.477062	-0.418628	0.300373	0.353351	0.415011	0.533779	lman_ra
ABTB1	nido	ra	0.636908	-0.0392769	-0.472707	-0.454014	-0.420431	0.201875	0.287232	0.350092	0.368915	nido_ra
ABTB1	stri	ra	0.585446	-0.0217646	-0.374567	-0.350913	-0.329657	0.26161	0.28557	0.349117	0.541437	stri_ra
ABTB1	lman	arco	0.595935	-0.000209199	-0.504687	-0.44911	-0.404641	0.345305	0.378619	0.418308	0.477238	lman_arco
ABTB1	nido	arco	0.640988	-0.0253593	-0.50339	-0.466985	-0.371732	0.247997	0.340135	0.377431	0.456799	nido_arco
ABTB1	stri	arco	0.625134	-0.0354278	-0.575514	-0.445318	-0.387042	0.252748	0.353166	0.386177	0.403204	stri_arco
ABTB1	ra	hvc	0.610374	0.0223592	-0.517673	-0.475917	-0.399562	0.381561	0.492196	0.546785	0.578609	ra_hvc
ABTB1	ra	lman	0.590626	-0.0366367	-0.480054	-0.477062	-0.418628	0.300373	0.353351	0.415011	0.533779	ra_lman
ABTB1	arco	lman	0.595935	-0.000209199	-0.504687	-0.44911	-0.404641	0.345305	0.378619	0.418308	0.477238	arco_lman
ABTB1	nido	lman	0.692616	0.0296035	-0.413291	-0.37181	-0.320296	0.330117	0.411223	0.491682	0.503915	nido_lman
ABTB1	stri	lman	0.677505	0.0136931	-0.462085	-0.434173	-0.346109	0.364227	0.413773	0.512285	0.609792	stri_lman
ABTB1	ra	nido	0.636908	-0.0392769	-0.472707	-0.454014	-0.420431	0.201875	0.287232	0.350092	0.368915	ra_nido
ABTB1	arco	nido	0.640988	-0.0253593	-0.50339	-0.466985	-0.371732	0.247997	0.340135	0.377431	0.456799	arco_nido
ABTB1	lman	nido	0.692616	0.0296035	-0.413291	-0.37181	-0.320296	0.330117	0.411223	0.491682	0.503915	lman_nido
ABTB1	x	nido	0.524997	-0.04762	-0.552171	-0.458147	-0.407933	0.30729	0.376721	0.405146	0.437548	x_nido
ABTB1	stri	nido	0.609842	-0.0307999	-0.586684	-0.539374	-0.475958	0.281358	0.324501	0.35038	0.372916	stri_nido
ABTB1	nido	x	0.524997	-0.04762	-0.552171	-0.458147	-0.407933	0.30729	0.376721	0.405146	0.437548	nido_x
ABTB1	stri	x	0.473433	-0.0282455	-0.415007	-0.386899	-0.34235	0.210121	0.3395	0.412641	0.45954	stri_x
ABTB1	ra	stri	0.585446	-0.0217646	-0.374567	-0.350913	-0.329657	0.26161	0.28557	0.349117	0.541437	ra_stri
ABTB1	arco	stri	0.625134	-0.0354278	-0.575514	-0.445318	-0.387042	0.252748	0.353166	0.386177	0.403204	arco_stri
ABTB1	lman	stri	0.677505	0.0136931	-0.462085	-0.434173	-0.346109	0.364227	0.413773	0.512285	0.609792	lman_stri
ABTB1	nido	stri	0.609842	-0.0307999	-0.586684	-0.539374	-0.475958	0.281358	0.324501	0.35038	0.372916	nido_stri
ABTB1	x	stri	0.473433	-0.0282455	-0.415007	-0.386899	-0.34235	0.210121	0.3395	0.412641	0.45954	x_stri
ACAD8	stri	nido	0.515496	-0.0136382	-0.533089	-0.496364	-0.437409	0.27722	0.346504	0.414624	0.463181	stri_nido
ACAD8	nido	stri	0.515496	-0.0136382	-0.533089	-0.496364	-0.437409	0.27722	0.346504	0.414624	0.463181	nido_stri
ACE	nido	ra	-0.530186	-0.00967473	-0.507106	-0.442025	-0.39736	0.303728	0.409818	0.483341	0.491478	nido_ra
ACE	ra	nido	-0.530186	-0.00967473	-0.507106	-0.442025	-0.39736	0.303728	0.409818	0.483341	0.491478	ra_nido
ACSBG2	lman	ra	0.595871	0.0176399	-0.474446	-0.452815	-0.333717	0.338053	0.382433	0.440673	0.450918	lman_ra
ACSBG2	lman	arco	0.402154	-0.018145	-0.665726	-0.556242	-0.459189	0.310397	0.348793	0.377944	0.401708	lman_arco
ACSBG2	nido	ncl	0.509281	-0.00485232	-0.463549	-0.428363	-0.340133	0.315971	0.347503	0.365409	0.402833	nido_ncl
ACSBG2	ra	lman	0.595871	0.0176399	-0.474446	-0.452815	-0.333717	0.338053	0.382433	0.440673	0.450918	ra_lman
ACSBG2	arco	lman	0.402154	-0.018145	-0.665726	-0.556242	-0.459189	0.310397	0.348793	0.377944	0.401708	arco_lman
ACSBG2	ncl	nido	0.509281	-0.00485232	-0.463549	-0.428363	-0.340133	0.315971	0.347503	0.365409	0.402833	ncl_nido
ACTL6A	hvc	ra	0.684247	-0.0498147	-0.475349	-0.412069	-0.378402	0.263369	0.390145	0.446084	0.518724	hvc_ra
ACTL6A	ra	hvc	0.684247	-0.0498147	-0.475349	-0.412069	-0.378402	0.263369	0.390145	0.446084	0.518724	ra_hvc
ACTL6A	stri	lman	0.419298	0.0268456	-0.46776	-0.416716	-0.33714	0.310132	0.362325	0.374441	0.384371	stri_lman
ACTL6A	stri	nido	0.651289	-0.0623529	-0.543388	-0.486334	-0.428092	0.211573	0.248758	0.351361	0.4608	stri_nido
ACTL6A	lman	stri	0.419298	0.0268456	-0.46776	-0.416716	-0.33714	0.310132	0.362325	0.374441	0.384371	lman_stri
ACTL6A	nido	stri	0.651289	-0.0623529	-0.543388	-0.486334	-0.428092	0.211573	0.248758	0.351361	0.4608	nido_stri
ACTR5	arco	ra	0.464932	0.00427221	-0.507598	-0.419596	-0.357579	0.293039	0.350943	0.402686	0.453065	arco_ra
ACTR5	ra	arco	0.464932	0.00427221	-0.507598	-0.419596	-0.357579	0.293039	0.350943	0.402686	0.453065	ra_arco
ACVRL1	arco	ra	0.403465	0.0164973	-0.513126	-0.446898	-0.29219	0.252951	0.331893	0.387987	0.397925	arco_ra
ACVRL1	ra	arco	0.403465	0.0164973	-0.513126	-0.446898	-0.29219	0.252951	0.331893	0.387987	0.397925	ra_arco
ADARB1	lman	arco	0.616086	0.0266247	-0.428361	-0.413219	-0.363132	0.339312	0.394878	0.439351	0.565685	lman_arco
ADARB1	ncl	hvc	-0.678376	-0.0447185	-0.581837	-0.526307	-0.445546	0.269884	0.30926	0.382183	0.470251	ncl_hvc
ADARB1	hvc	ncl	-0.678376	-0.0447185	-0.581837	-0.526307	-0.445546	0.269884	0.30926	0.382183	0.470251	hvc_ncl
ADARB1	arco	lman	0.616086	0.0266247	-0.428361	-0.413219	-0.363132	0.339312	0.394878	0.439351	0.565685	arco_lman
ADCK2	arco	ra	0.622237	-0.0274103	-0.626678	-0.528792	-0.500568	0.308561	0.368706	0.474664	0.510956	arco_ra
ADCK2	ncl	ra	0.710771	0.00264869	-0.480074	-0.462165	-0.408405	0.255019	0.405648	0.470226	0.481673	ncl_ra
ADCK2	x	ra	0.598108	-0.0131111	-0.547425	-0.497185	-0.382454	0.293883	0.397889	0.467691	0.500621	x_ra
ADCK2	stri	ra	0.607786	-0.0176098	-0.610028	-0.557377	-0.416764	0.300211	0.382029	0.48773	0.542979	stri_ra
ADCK2	ra	arco	0.622237	-0.0274103	-0.626678	-0.528792	-0.500568	0.308561	0.368706	0.474664	0.510956	ra_arco
ADCK2	hvc	arco	0.444553	-0.0108816	-0.408044	-0.382298	-0.346229	0.258553	0.329209	0.382835	0.393545	hvc_arco
ADCK2	ncl	arco	0.679393	0.00636793	-0.354765	-0.341362	-0.279727	0.246433	0.401652	0.511512	0.601668	ncl_arco
ADCK2	lman	arco	0.627142	0.0309382	-0.469187	-0.401471	-0.350625	0.339993	0.391642	0.449656	0.547215	lman_arco
ADCK2	x	arco	0.847056	0.0101522	-0.377845	-0.367579	-0.358785	0.33374	0.373388	0.426125	0.485455	x_arco
ADCK2	stri	arco	0.650453	0.00546622	-0.448762	-0.416445	-0.364076	0.318314	0.366749	0.437658	0.469073	stri_arco
ADCK2	arco	hvc	0.444553	-0.0108816	-0.408044	-0.382298	-0.346229	0.258553	0.329209	0.382835	0.393545	arco_hvc
ADCK2	ncl	hvc	0.493595	-0.0194448	-0.47038	-0.440939	-0.38467	0.259599	0.37961	0.433038	0.481393	ncl_hvc
ADCK2	ra	ncl	0.710771	0.00264869	-0.480074	-0.462165	-0.408405	0.255019	0.405648	0.470226	0.481673	ra_ncl
ADCK2	arco	ncl	0.679393	0.00636793	-0.354765	-0.341362	-0.279727	0.246433	0.401652	0.511512	0.601668	arco_ncl
ADCK2	hvc	ncl	0.493595	-0.0194448	-0.47038	-0.440939	-0.38467	0.259599	0.37961	0.433038	0.481393	hvc_ncl
ADCK2	x	ncl	0.589969	0.0240841	-0.431225	-0.405309	-0.351366	0.311485	0.372073	0.403293	0.560376	x_ncl
ADCK2	arco	lman	0.627142	0.0309382	-0.469187	-0.401471	-0.350625	0.339993	0.391642	0.449656	0.547215	arco_lman
ADCK2	x	lman	0.687002	0.0291822	-0.450628	-0.386007	-0.317782	0.299377	0.384926	0.40938	0.439409	x_lman
ADCK2	ra	x	0.598108	-0.0131111	-0.547425	-0.497185	-0.382454	0.293883	0.397889	0.467691	0.500621	ra_x
ADCK2	arco	x	0.847056	0.0101522	-0.377845	-0.367579	-0.358785	0.33374	0.373388	0.426125	0.485455	arco_x
ADCK2	ncl	x	0.589969	0.0240841	-0.431225	-0.405309	-0.351366	0.311485	0.372073	0.403293	0.560376	ncl_x
ADCK2	lman	x	0.687002	0.0291822	-0.450628	-0.386007	-0.317782	0.299377	0.384926	0.40938	0.439409	lman_x
ADCK2	stri	x	0.666799	0.0130864	-0.474072	-0.419414	-0.351995	0.336406	0.411314	0.448312	0.506487	stri_x
ADCK2	ra	stri	0.607786	-0.0176098	-0.610028	-0.557377	-0.416764	0.300211	0.382029	0.48773	0.542979	ra_stri
ADCK2	arco	stri	0.650453	0.00546622	-0.448762	-0.416445	-0.364076	0.318314	0.366749	0.437658	0.469073	arco_stri
ADCK2	x	stri	0.666799	0.0130864	-0.474072	-0.419414	-0.351995	0.336406	0.411314	0.448312	0.506487	x_stri
ADCY2	arco	ra	0.516834	-0.0260662	-0.561575	-0.48729	-0.425426	0.284185	0.341485	0.362619	0.405681	arco_ra
ADCY2	ra	arco	0.516834	-0.0260662	-0.561575	-0.48729	-0.425426	0.284185	0.341485	0.362619	0.405681	ra_arco
ADCY2	ncl	hvc	0.522902	0.00584885	-0.558217	-0.488292	-0.351025	0.283153	0.367203	0.406253	0.504053	ncl_hvc
ADCY2	hvc	ncl	0.522902	0.00584885	-0.558217	-0.488292	-0.351025	0.283153	0.367203	0.406253	0.504053	hvc_ncl
ADCY2	lman	ncl	0.631729	-0.0178383	-0.478126	-0.465834	-0.391447	0.305072	0.413728	0.485426	0.567486	lman_ncl
ADCY2	ncl	lman	0.631729	-0.0178383	-0.478126	-0.465834	-0.391447	0.305072	0.413728	0.485426	0.567486	ncl_lman
ADCY5	x	ncl	0.60189	-0.0134647	-0.529309	-0.446689	-0.376285	0.275488	0.394711	0.466273	0.587824	x_ncl
ADCY5	ncl	x	0.60189	-0.0134647	-0.529309	-0.446689	-0.376285	0.275488	0.394711	0.466273	0.587824	ncl_x
ADCYAP1	hvc	arco	0.564344	0.026403	-0.458834	-0.375861	-0.35846	0.289497	0.38629	0.400603	0.410426	hvc_arco
ADCYAP1	lman	arco	0.603691	-0.00160577	-0.535505	-0.509898	-0.414704	0.339665	0.400284	0.44068	0.468414	lman_arco
ADCYAP1	arco	hvc	0.564344	0.026403	-0.458834	-0.375861	-0.35846	0.289497	0.38629	0.400603	0.410426	arco_hvc
ADCYAP1	nido	hvc	0.597042	-0.0409306	-0.59253	-0.493007	-0.396867	0.326105	0.386122	0.475519	0.559508	nido_hvc
ADCYAP1	arco	lman	0.603691	-0.00160577	-0.535505	-0.509898	-0.414704	0.339665	0.400284	0.44068	0.468414	arco_lman
ADCYAP1	hvc	nido	0.597042	-0.0409306	-0.59253	-0.493007	-0.396867	0.326105	0.386122	0.475519	0.559508	hvc_nido
ADGRL2	nido	arco	0.397707	-0.0448295	-0.568542	-0.543972	-0.475225	0.253234	0.280303	0.33732	0.379574	nido_arco
ADGRL2	stri	lman	0.458262	-0.0244886	-0.500091	-0.46488	-0.425558	0.289396	0.38368	0.414636	0.451172	stri_lman
ADGRL2	arco	nido	0.397707	-0.0448295	-0.568542	-0.543972	-0.475225	0.253234	0.280303	0.33732	0.379574	arco_nido
ADGRL2	stri	nido	0.643137	-0.010209	-0.615034	-0.478837	-0.415616	0.259041	0.337271	0.400231	0.529862	stri_nido
ADGRL2	stri	x	0.599955	-0.043776	-0.688957	-0.53855	-0.450318	0.280464	0.32912	0.357149	0.381881	stri_x
ADGRL2	lman	stri	0.458262	-0.0244886	-0.500091	-0.46488	-0.425558	0.289396	0.38368	0.414636	0.451172	lman_stri
ADGRL2	nido	stri	0.643137	-0.010209	-0.615034	-0.478837	-0.415616	0.259041	0.337271	0.400231	0.529862	nido_stri
ADGRL2	x	stri	0.599955	-0.043776	-0.688957	-0.53855	-0.450318	0.280464	0.32912	0.357149	0.381881	x_stri
ADNP2	hvc	ra	-0.386752	0.0494256	-0.357881	-0.339034	-0.289401	0.330979	0.348471	0.394552	0.425467	hvc_ra
ADNP2	ra	hvc	-0.386752	0.0494256	-0.357881	-0.339034	-0.289401	0.330979	0.348471	0.394552	0.425467	ra_hvc
ADNP2	x	ncl	0.565056	0.0164619	-0.437192	-0.395317	-0.313534	0.280843	0.352879	0.426747	0.459999	x_ncl
ADNP2	ncl	x	0.565056	0.0164619	-0.437192	-0.395317	-0.313534	0.280843	0.352879	0.426747	0.459999	ncl_x
ADORA1	hvc	ra	0.459928	-0.0400964	-0.543316	-0.520728	-0.390639	0.226404	0.270883	0.317972	0.432196	hvc_ra
ADORA1	nido	ra	0.681516	0.00580871	-0.447244	-0.388477	-0.363504	0.276642	0.344256	0.468022	0.527278	nido_ra
ADORA1	lman	arco	0.479211	-0.00755594	-0.596143	-0.473342	-0.379687	0.277488	0.350227	0.404193	0.435398	lman_arco
ADORA1	nido	arco	0.468784	-0.0129121	-0.566841	-0.490313	-0.461078	0.295011	0.339733	0.424875	0.453146	nido_arco
ADORA1	stri	arco	0.46929	-0.0256458	-0.571287	-0.552795	-0.462121	0.308061	0.381092	0.440057	0.44875	stri_arco
ADORA1	ra	hvc	0.459928	-0.0400964	-0.543316	-0.520728	-0.390639	0.226404	0.270883	0.317972	0.432196	ra_hvc
ADORA1	arco	lman	0.479211	-0.00755594	-0.596143	-0.473342	-0.379687	0.277488	0.350227	0.404193	0.435398	arco_lman
ADORA1	ra	nido	0.681516	0.00580871	-0.447244	-0.388477	-0.363504	0.276642	0.344256	0.468022	0.527278	ra_nido
ADORA1	arco	nido	0.468784	-0.0129121	-0.566841	-0.490313	-0.461078	0.295011	0.339733	0.424875	0.453146	arco_nido
ADORA1	arco	stri	0.46929	-0.0256458	-0.571287	-0.552795	-0.462121	0.308061	0.381092	0.440057	0.44875	arco_stri
ADORA2A	x	ncl	0.600976	-0.00807217	-0.432496	-0.41183	-0.380187	0.258778	0.35182	0.421961	0.597563	x_ncl
ADORA2A	ncl	x	0.600976	-0.00807217	-0.432496	-0.41183	-0.380187	0.258778	0.35182	0.421961	0.597563	ncl_x
ADRA2C	lman	ra	0.462989	0.0127785	-0.52014	-0.444901	-0.354667	0.281839	0.367314	0.421459	0.45628	lman_ra
ADRA2C	ncl	arco	0.459309	-0.0136023	-0.490531	-0.389796	-0.366919	0.267211	0.344373	0.42219	0.447091	ncl_arco
ADRA2C	arco	ncl	0.459309	-0.0136023	-0.490531	-0.389796	-0.366919	0.267211	0.344373	0.42219	0.447091	arco_ncl
ADRA2C	ra	lman	0.462989	0.0127785	-0.52014	-0.444901	-0.354667	0.281839	0.367314	0.421459	0.45628	ra_lman
AGAP2	lman	ra	0.640041	-0.00369109	-0.716192	-0.454403	-0.435482	0.344329	0.385043	0.412987	0.445884	lman_ra
AGAP2	nido	ra	0.681409	-0.0145667	-0.500045	-0.454245	-0.422519	0.285249	0.377288	0.420092	0.46317	nido_ra
AGAP2	hvc	arco	0.582696	0.0178256	-0.452708	-0.404858	-0.363703	0.312075	0.480945	0.493928	0.514279	hvc_arco
AGAP2	nido	arco	0.689805	-0.0101064	-0.4838	-0.424859	-0.379752	0.268384	0.459839	0.526685	0.579727	nido_arco
AGAP2	arco	hvc	0.582696	0.0178256	-0.452708	-0.404858	-0.363703	0.312075	0.480945	0.493928	0.514279	arco_hvc
AGAP2	lman	ncl	0.535761	0.000769592	-0.480715	-0.417344	-0.383557	0.307863	0.384725	0.399735	0.451523	lman_ncl
AGAP2	ra	lman	0.640041	-0.00369109	-0.716192	-0.454403	-0.435482	0.344329	0.385043	0.412987	0.445884	ra_lman
AGAP2	ncl	lman	0.535761	0.000769592	-0.480715	-0.417344	-0.383557	0.307863	0.384725	0.399735	0.451523	ncl_lman
AGAP2	nido	lman	0.62324	-0.00852644	-0.491978	-0.443913	-0.358315	0.336117	0.424161	0.434685	0.490857	nido_lman
AGAP2	ra	nido	0.681409	-0.0145667	-0.500045	-0.454245	-0.422519	0.285249	0.377288	0.420092	0.46317	ra_nido
AGAP2	arco	nido	0.689805	-0.0101064	-0.4838	-0.424859	-0.379752	0.268384	0.459839	0.526685	0.579727	arco_nido
AGAP2	lman	nido	0.62324	-0.00852644	-0.491978	-0.443913	-0.358315	0.336117	0.424161	0.434685	0.490857	lman_nido
AGR2	lman	arco	0.56882	-0.0183171	-0.479326	-0.458876	-0.406467	0.285786	0.388734	0.489913	0.520688	lman_arco
AGR2	nido	hvc	0.412396	-0.0552247	-0.581354	-0.512964	-0.401158	0.227247	0.311648	0.363375	0.408208	nido_hvc
AGR2	lman	ncl	0.758356	0.00749483	-0.455843	-0.397988	-0.353886	0.329308	0.372436	0.451626	0.535473	lman_ncl
AGR2	arco	lman	0.56882	-0.0183171	-0.479326	-0.458876	-0.406467	0.285786	0.388734	0.489913	0.520688	arco_lman
AGR2	ncl	lman	0.758356	0.00749483	-0.455843	-0.397988	-0.353886	0.329308	0.372436	0.451626	0.535473	ncl_lman
AGR2	hvc	nido	0.412396	-0.0552247	-0.581354	-0.512964	-0.401158	0.227247	0.311648	0.363375	0.408208	hvc_nido
AGR2	stri	x	0.50678	-0.00282211	-0.482529	-0.373177	-0.340681	0.340385	0.371419	0.414332	0.420959	stri_x
AGR2	x	stri	0.50678	-0.00282211	-0.482529	-0.373177	-0.340681	0.340385	0.371419	0.414332	0.420959	x_stri
AK4	arco	ra	0.544183	0.0171723	-0.576631	-0.566282	-0.462225	0.310236	0.388998	0.408585	0.531777	arco_ra
AK4	hvc	ra	0.705887	-0.018736	-0.53586	-0.459381	-0.415856	0.281013	0.386968	0.418493	0.429183	hvc_ra
AK4	ncl	ra	0.625415	0.00269291	-0.521299	-0.491671	-0.392222	0.35161	0.469549	0.478726	0.571654	ncl_ra
AK4	ra	arco	0.544183	0.0171723	-0.576631	-0.566282	-0.462225	0.310236	0.388998	0.408585	0.531777	ra_arco
AK4	nido	arco	0.621805	0.0144668	-0.545835	-0.470295	-0.406508	0.305022	0.423955	0.497227	0.569091	nido_arco
AK4	stri	arco	0.513363	0.0407442	-0.545318	-0.470379	-0.424737	0.371564	0.403366	0.438518	0.489862	stri_arco
AK4	ra	hvc	0.705887	-0.018736	-0.53586	-0.459381	-0.415856	0.281013	0.386968	0.418493	0.429183	ra_hvc
AK4	ra	ncl	0.625415	0.00269291	-0.521299	-0.491671	-0.392222	0.35161	0.469549	0.478726	0.571654	ra_ncl
AK4	arco	nido	0.621805	0.0144668	-0.545835	-0.470295	-0.406508	0.305022	0.423955	0.497227	0.569091	arco_nido
AK4	arco	stri	0.513363	0.0407442	-0.545318	-0.470379	-0.424737	0.371564	0.403366	0.438518	0.489862	arco_stri
AKAP8	x	ra	0.538411	-0.00158733	-0.5008	-0.475838	-0.391605	0.317324	0.388015	0.422956	0.476944	x_ra
AKAP8	ncl	hvc	0.399991	0.00249067	-0.420895	-0.378481	-0.367989	0.240288	0.307391	0.324534	0.346245	ncl_hvc
AKAP8	hvc	ncl	0.399991	0.00249067	-0.420895	-0.378481	-0.367989	0.240288	0.307391	0.324534	0.346245	hvc_ncl
AKAP8	stri	ncl	0.607455	-0.0133253	-0.543051	-0.471931	-0.409755	0.290254	0.361164	0.465497	0.489361	stri_ncl
AKAP8	stri	nido	0.528191	0.0234777	-0.525104	-0.454418	-0.365685	0.361326	0.424232	0.440274	0.470377	stri_nido
AKAP8	ra	x	0.538411	-0.00158733	-0.5008	-0.475838	-0.391605	0.317324	0.388015	0.422956	0.476944	ra_x
AKAP8	stri	x	0.587924	-0.00735013	-0.476449	-0.447448	-0.429709	0.247673	0.397028	0.421798	0.4769	stri_x
AKAP8	ncl	stri	0.607455	-0.0133253	-0.543051	-0.471931	-0.409755	0.290254	0.361164	0.465497	0.489361	ncl_stri
AKAP8	nido	stri	0.528191	0.0234777	-0.525104	-0.454418	-0.365685	0.361326	0.424232	0.440274	0.470377	nido_stri
AKAP8	x	stri	0.587924	-0.00735013	-0.476449	-0.447448	-0.429709	0.247673	0.397028	0.421798	0.4769	x_stri
ALDH1A2	hvc	ra	-0.480352	0.0216049	-0.468408	-0.425608	-0.391804	0.277778	0.333707	0.365984	0.374729	hvc_ra
ALDH1A2	x	arco	0.567953	-0.0140434	-0.438752	-0.409787	-0.375997	0.319547	0.474741	0.497652	0.551771	x_arco
ALDH1A2	ra	hvc	-0.480352	0.0216049	-0.468408	-0.425608	-0.391804	0.277778	0.333707	0.365984	0.374729	ra_hvc
ALDH1A2	arco	x	0.567953	-0.0140434	-0.438752	-0.409787	-0.375997	0.319547	0.474741	0.497652	0.551771	arco_x
ALDH4A1	lman	ra	0.816847	0.0146438	-0.498892	-0.483128	-0.36433	0.288526	0.338264	0.403021	0.455201	lman_ra
ALDH4A1	stri	arco	0.568505	-0.00590604	-0.535582	-0.511063	-0.416999	0.320822	0.353312	0.424145	0.472168	stri_arco
ALDH4A1	ra	lman	0.816847	0.0146438	-0.498892	-0.483128	-0.36433	0.288526	0.338264	0.403021	0.455201	ra_lman
ALDH4A1	arco	stri	0.568505	-0.00590604	-0.535582	-0.511063	-0.416999	0.320822	0.353312	0.424145	0.472168	arco_stri
ALG10B	nido	lman	0.472845	-0.0080387	-0.697954	-0.575706	-0.470572	0.264725	0.298004	0.335937	0.361813	nido_lman
ALG10B	lman	nido	0.472845	-0.0080387	-0.697954	-0.575706	-0.470572	0.264725	0.298004	0.335937	0.361813	lman_nido
AMBP	x	ra	0.599857	0.00531403	-0.498967	-0.443357	-0.350254	0.318009	0.378388	0.41805	0.43297	x_ra
AMBP	ra	x	0.599857	0.00531403	-0.498967	-0.443357	-0.350254	0.318009	0.378388	0.41805	0.43297	ra_x
AMIGO2	hvc	ra	0.558696	-0.0161726	-0.671689	-0.583968	-0.435151	0.329089	0.34871	0.367587	0.401985	hvc_ra
AMIGO2	stri	arco	-0.480948	0.00783312	-0.46283	-0.424751	-0.388409	0.351655	0.405838	0.424298	0.486547	stri_arco
AMIGO2	ra	hvc	0.558696	-0.0161726	-0.671689	-0.583968	-0.435151	0.329089	0.34871	0.367587	0.401985	ra_hvc
AMIGO2	arco	stri	-0.480948	0.00783312	-0.46283	-0.424751	-0.388409	0.351655	0.405838	0.424298	0.486547	arco_stri
AMN1	hvc	ra	0.691644	-0.0485494	-0.457031	-0.45095	-0.37902	0.244488	0.352758	0.473469	0.499363	hvc_ra
AMN1	ncl	ra	0.829254	-0.01246	-0.525748	-0.493817	-0.36679	0.346927	0.395357	0.501594	0.603505	ncl_ra
AMN1	lman	ra	0.668927	0.0105058	-0.451725	-0.422326	-0.38098	0.379013	0.426752	0.462709	0.557277	lman_ra
AMN1	nido	ra	0.582456	0.00471255	-0.451662	-0.429479	-0.380492	0.31591	0.393989	0.436188	0.464864	nido_ra
AMN1	x	ra	0.723018	0.00953124	-0.443573	-0.398598	-0.359314	0.316525	0.390206	0.524205	0.661925	x_ra
AMN1	stri	ra	0.625362	0.0120937	-0.566192	-0.454217	-0.42676	0.413185	0.494374	0.525175	0.603489	stri_ra
AMN1	hvc	arco	0.780154	-0.0474488	-0.508235	-0.484425	-0.444141	0.24096	0.28911	0.3847	0.44839	hvc_arco
AMN1	ncl	arco	0.568032	-0.00122857	-0.477963	-0.436241	-0.353363	0.268975	0.340728	0.407543	0.489765	ncl_arco
AMN1	nido	arco	0.642179	0.00568764	-0.518735	-0.489811	-0.433889	0.37311	0.45183	0.484202	0.508575	nido_arco
AMN1	x	arco	0.618122	-0.0104008	-0.552864	-0.432517	-0.3998	0.267143	0.288283	0.395396	0.493611	x_arco
AMN1	stri	arco	0.574736	-0.0318516	-0.498607	-0.410225	-0.384233	0.270063	0.359611	0.376593	0.410727	stri_arco
AMN1	ra	hvc	0.691644	-0.0485494	-0.457031	-0.45095	-0.37902	0.244488	0.352758	0.473469	0.499363	ra_hvc
AMN1	arco	hvc	0.780154	-0.0474488	-0.508235	-0.484425	-0.444141	0.24096	0.28911	0.3847	0.44839	arco_hvc
AMN1	ncl	hvc	0.746886	0.0321392	-0.46501	-0.407894	-0.379187	0.349583	0.390244	0.460893	0.576666	ncl_hvc
AMN1	x	hvc	0.725549	0.0110541	-0.559888	-0.484224	-0.419449	0.364915	0.402962	0.455371	0.634612	x_hvc
AMN1	stri	hvc	0.668949	0.0106878	-0.442986	-0.410524	-0.384201	0.331288	0.438419	0.466694	0.483908	stri_hvc
AMN1	ra	ncl	0.829254	-0.01246	-0.525748	-0.493817	-0.36679	0.346927	0.395357	0.501594	0.603505	ra_ncl
AMN1	arco	ncl	0.568032	-0.00122857	-0.477963	-0.436241	-0.353363	0.268975	0.340728	0.407543	0.489765	arco_ncl
AMN1	hvc	ncl	0.746886	0.0321392	-0.46501	-0.407894	-0.379187	0.349583	0.390244	0.460893	0.576666	hvc_ncl
AMN1	lman	ncl	0.516748	-0.0183135	-0.590958	-0.504782	-0.423372	0.314921	0.358459	0.439417	0.457942	lman_ncl
AMN1	nido	ncl	0.575136	-0.000676967	-0.496424	-0.456293	-0.43974	0.371087	0.422102	0.474974	0.485375	nido_ncl
AMN1	x	ncl	0.655897	0.00316374	-0.496924	-0.424876	-0.370353	0.279734	0.328149	0.398348	0.42654	x_ncl
AMN1	ra	lman	0.668927	0.0105058	-0.451725	-0.422326	-0.38098	0.379013	0.426752	0.462709	0.557277	ra_lman
AMN1	ncl	lman	0.516748	-0.0183135	-0.590958	-0.504782	-0.423372	0.314921	0.358459	0.439417	0.457942	ncl_lman
AMN1	nido	lman	0.572595	0.0303668	-0.468338	-0.395979	-0.319298	0.391602	0.48093	0.544383	0.552108	nido_lman
AMN1	ra	nido	0.582456	0.00471255	-0.451662	-0.429479	-0.380492	0.31591	0.393989	0.436188	0.464864	ra_nido
AMN1	arco	nido	0.642179	0.00568764	-0.518735	-0.489811	-0.433889	0.37311	0.45183	0.484202	0.508575	arco_nido
AMN1	ncl	nido	0.575136	-0.000676967	-0.496424	-0.456293	-0.43974	0.371087	0.422102	0.474974	0.485375	ncl_nido
AMN1	lman	nido	0.572595	0.0303668	-0.468338	-0.395979	-0.319298	0.391602	0.48093	0.544383	0.552108	lman_nido
AMN1	x	nido	0.621228	-0.00405703	-0.489661	-0.416246	-0.35461	0.287892	0.370246	0.469224	0.557411	x_nido
AMN1	stri	nido	0.567164	0.0073579	-0.406737	-0.337547	-0.308278	0.228669	0.305019	0.396051	0.479458	stri_nido
AMN1	ra	x	0.723018	0.00953124	-0.443573	-0.398598	-0.359314	0.316525	0.390206	0.524205	0.661925	ra_x
AMN1	arco	x	0.618122	-0.0104008	-0.552864	-0.432517	-0.3998	0.267143	0.288283	0.395396	0.493611	arco_x
AMN1	hvc	x	0.725549	0.0110541	-0.559888	-0.484224	-0.419449	0.364915	0.402962	0.455371	0.634612	hvc_x
AMN1	ncl	x	0.655897	0.00316374	-0.496924	-0.424876	-0.370353	0.279734	0.328149	0.398348	0.42654	ncl_x
AMN1	nido	x	0.621228	-0.00405703	-0.489661	-0.416246	-0.35461	0.287892	0.370246	0.469224	0.557411	nido_x
AMN1	stri	x	0.748049	-0.051015	-0.545067	-0.493541	-0.356328	0.197518	0.397613	0.455964	0.495728	stri_x
AMN1	ra	stri	0.625362	0.0120937	-0.566192	-0.454217	-0.42676	0.413185	0.494374	0.525175	0.603489	ra_stri
AMN1	arco	stri	0.574736	-0.0318516	-0.498607	-0.410225	-0.384233	0.270063	0.359611	0.376593	0.410727	arco_stri
AMN1	hvc	stri	0.668949	0.0106878	-0.442986	-0.410524	-0.384201	0.331288	0.438419	0.466694	0.483908	hvc_stri
AMN1	nido	stri	0.567164	0.0073579	-0.406737	-0.337547	-0.308278	0.228669	0.305019	0.396051	0.479458	nido_stri
AMN1	x	stri	0.748049	-0.051015	-0.545067	-0.493541	-0.356328	0.197518	0.397613	0.455964	0.495728	x_stri
ANGPT2	nido	arco	0.629681	-0.0068595	-0.546807	-0.462005	-0.394516	0.298	0.35755	0.402722	0.524009	nido_arco
ANGPT2	arco	nido	0.629681	-0.0068595	-0.546807	-0.462005	-0.394516	0.298	0.35755	0.402722	0.524009	arco_nido
ANKDD1A	hvc	ra	-0.443401	0.00314885	-0.429004	-0.385608	-0.353255	0.34063	0.396885	0.468303	0.494318	hvc_ra
ANKDD1A	ra	hvc	-0.443401	0.00314885	-0.429004	-0.385608	-0.353255	0.34063	0.396885	0.468303	0.494318	ra_hvc
ANKDD1A	lman	ncl	0.557337	0.00164784	-0.484796	-0.431413	-0.339943	0.31875	0.432514	0.465095	0.513736	lman_ncl
ANKDD1A	ncl	lman	0.557337	0.00164784	-0.484796	-0.431413	-0.339943	0.31875	0.432514	0.465095	0.513736	ncl_lman
ANKFN1	nido	lman	0.428313	-0.0101368	-0.593282	-0.533181	-0.413273	0.296648	0.30898	0.355963	0.392792	nido_lman
ANKFN1	stri	lman	0.601112	-0.0102724	-0.634505	-0.477556	-0.345701	0.317141	0.364764	0.498638	0.575484	stri_lman
ANKFN1	lman	nido	0.428313	-0.0101368	-0.593282	-0.533181	-0.413273	0.296648	0.30898	0.355963	0.392792	lman_nido
ANKFN1	stri	x	0.641187	0.0110559	-0.416751	-0.410088	-0.362394	0.393108	0.422671	0.482365	0.539961	stri_x
ANKFN1	lman	stri	0.601112	-0.0102724	-0.634505	-0.477556	-0.345701	0.317141	0.364764	0.498638	0.575484	lman_stri
ANKFN1	x	stri	0.641187	0.0110559	-0.416751	-0.410088	-0.362394	0.393108	0.422671	0.482365	0.539961	x_stri
ANKRD26	ncl	hvc	0.651957	-0.0176697	-0.667741	-0.615524	-0.485523	0.304146	0.36517	0.443859	0.565399	ncl_hvc
ANKRD26	nido	hvc	0.654204	0.0161024	-0.515795	-0.492682	-0.427638	0.351987	0.459067	0.486439	0.591645	nido_hvc
ANKRD26	hvc	ncl	0.651957	-0.0176697	-0.667741	-0.615524	-0.485523	0.304146	0.36517	0.443859	0.565399	hvc_ncl
ANKRD26	nido	ncl	0.594709	0.0557111	-0.36177	-0.346735	-0.331226	0.35998	0.414244	0.474629	0.485793	nido_ncl
ANKRD26	hvc	nido	0.654204	0.0161024	-0.515795	-0.492682	-0.427638	0.351987	0.459067	0.486439	0.591645	hvc_nido
ANKRD26	ncl	nido	0.594709	0.0557111	-0.36177	-0.346735	-0.331226	0.35998	0.414244	0.474629	0.485793	ncl_nido
ANKRD55	stri	lman	0.516704	0.0171754	-0.529933	-0.429383	-0.369435	0.303943	0.367035	0.43135	0.463574	stri_lman
ANKRD55	lman	stri	0.516704	0.0171754	-0.529933	-0.429383	-0.369435	0.303943	0.367035	0.43135	0.463574	lman_stri
ANKRD6	stri	x	0.564039	-0.00774607	-0.496337	-0.482299	-0.45615	0.349278	0.399608	0.448038	0.518516	stri_x
ANKRD6	x	stri	0.564039	-0.00774607	-0.496337	-0.482299	-0.45615	0.349278	0.399608	0.448038	0.518516	x_stri
ANXA11	arco	ra	0.643998	0.00377528	-0.550812	-0.451964	-0.367573	0.288374	0.380966	0.465019	0.49661	arco_ra
ANXA11	ncl	ra	0.528984	-0.00934215	-0.509797	-0.445284	-0.365061	0.248145	0.315147	0.35022	0.377464	ncl_ra
ANXA11	nido	ra	0.458277	0.0156483	-0.569308	-0.433227	-0.384421	0.328064	0.341404	0.37126	0.38347	nido_ra
ANXA11	ra	arco	0.643998	0.00377528	-0.550812	-0.451964	-0.367573	0.288374	0.380966	0.465019	0.49661	ra_arco
ANXA11	hvc	arco	0.612945	-0.0162262	-0.583411	-0.492508	-0.392024	0.295708	0.352787	0.368682	0.509736	hvc_arco
ANXA11	ncl	arco	0.642304	0.0075975	-0.383253	-0.361789	-0.334533	0.31527	0.377403	0.412771	0.450915	ncl_arco
ANXA11	lman	arco	0.469321	-0.00780538	-0.513406	-0.410542	-0.347313	0.353931	0.402915	0.436661	0.464678	lman_arco
ANXA11	arco	hvc	0.612945	-0.0162262	-0.583411	-0.492508	-0.392024	0.295708	0.352787	0.368682	0.509736	arco_hvc
ANXA11	ncl	hvc	0.678053	-0.0247517	-0.55455	-0.469733	-0.33753	0.270963	0.380254	0.4495	0.557989	ncl_hvc
ANXA11	ra	ncl	0.528984	-0.00934215	-0.509797	-0.445284	-0.365061	0.248145	0.315147	0.35022	0.377464	ra_ncl
ANXA11	arco	ncl	0.642304	0.0075975	-0.383253	-0.361789	-0.334533	0.31527	0.377403	0.412771	0.450915	arco_ncl
ANXA11	hvc	ncl	0.678053	-0.0247517	-0.55455	-0.469733	-0.33753	0.270963	0.380254	0.4495	0.557989	hvc_ncl
ANXA11	lman	ncl	0.449913	-0.0353072	-0.608428	-0.536524	-0.403674	0.302619	0.337282	0.443879	0.448836	lman_ncl
ANXA11	nido	ncl	0.606458	-0.0406732	-0.533769	-0.507436	-0.47093	0.318545	0.391695	0.435769	0.448828	nido_ncl
ANXA11	arco	lman	0.469321	-0.00780538	-0.513406	-0.410542	-0.347313	0.353931	0.402915	0.436661	0.464678	arco_lman
ANXA11	ncl	lman	0.449913	-0.0353072	-0.608428	-0.536524	-0.403674	0.302619	0.337282	0.443879	0.448836	ncl_lman
ANXA11	nido	lman	0.680951	-0.0425345	-0.622783	-0.492044	-0.453938	0.315923	0.408579	0.440179	0.530383	nido_lman
ANXA11	stri	lman	0.493367	-0.0386368	-0.530497	-0.496524	-0.451476	0.254773	0.325906	0.392368	0.468416	stri_lman
ANXA11	ra	nido	0.458277	0.0156483	-0.569308	-0.433227	-0.384421	0.328064	0.341404	0.37126	0.38347	ra_nido
ANXA11	ncl	nido	0.606458	-0.0406732	-0.533769	-0.507436	-0.47093	0.318545	0.391695	0.435769	0.448828	ncl_nido
ANXA11	lman	nido	0.680951	-0.0425345	-0.622783	-0.492044	-0.453938	0.315923	0.408579	0.440179	0.530383	lman_nido
ANXA11	lman	stri	0.493367	-0.0386368	-0.530497	-0.496524	-0.451476	0.254773	0.325906	0.392368	0.468416	lman_stri
ANXA2	hvc	ra	0.518856	-0.0160304	-0.502044	-0.436459	-0.368389	0.2472	0.339664	0.37972	0.470283	hvc_ra
ANXA2	stri	ra	0.614051	0.0101457	-0.418914	-0.39827	-0.358003	0.33325	0.391229	0.418192	0.498497	stri_ra
ANXA2	ra	hvc	0.518856	-0.0160304	-0.502044	-0.436459	-0.368389	0.2472	0.339664	0.37972	0.470283	ra_hvc
ANXA2	ra	stri	0.614051	0.0101457	-0.418914	-0.39827	-0.358003	0.33325	0.391229	0.418192	0.498497	ra_stri
ANXA7	ncl	ra	0.532735	0.0108482	-0.525608	-0.48236	-0.399939	0.314639	0.349004	0.420286	0.475301	ncl_ra
ANXA7	x	ra	0.52093	-0.0306187	-0.600093	-0.578234	-0.476706	0.235631	0.287715	0.379365	0.452145	x_ra
ANXA7	stri	ra	0.50833	-0.0264196	-0.510481	-0.47585	-0.424916	0.314493	0.398435	0.456901	0.479055	stri_ra
ANXA7	nido	arco	0.497103	-0.0612128	-0.541399	-0.502969	-0.495593	0.275267	0.332517	0.36754	0.451793	nido_arco
ANXA7	ra	ncl	0.532735	0.0108482	-0.525608	-0.48236	-0.399939	0.314639	0.349004	0.420286	0.475301	ra_ncl
ANXA7	x	ncl	0.666668	0.00970305	-0.434555	-0.388772	-0.292858	0.284757	0.496488	0.519199	0.599411	x_ncl
ANXA7	arco	nido	0.497103	-0.0612128	-0.541399	-0.502969	-0.495593	0.275267	0.332517	0.36754	0.451793	arco_nido
ANXA7	ra	x	0.52093	-0.0306187	-0.600093	-0.578234	-0.476706	0.235631	0.287715	0.379365	0.452145	ra_x
ANXA7	ncl	x	0.666668	0.00970305	-0.434555	-0.388772	-0.292858	0.284757	0.496488	0.519199	0.599411	ncl_x
ANXA7	ra	stri	0.50833	-0.0264196	-0.510481	-0.47585	-0.424916	0.314493	0.398435	0.456901	0.479055	ra_stri
AOAH	arco	ra	0.60524	-0.037849	-0.507577	-0.486078	-0.413135	0.278009	0.375613	0.431753	0.504737	arco_ra
AOAH	stri	ra	0.642791	-0.0151674	-0.686234	-0.62141	-0.432156	0.361999	0.432208	0.479214	0.599749	stri_ra
AOAH	ra	arco	0.60524	-0.037849	-0.507577	-0.486078	-0.413135	0.278009	0.375613	0.431753	0.504737	ra_arco
AOAH	ncl	hvc	0.553558	0.00565523	-0.494432	-0.439676	-0.336714	0.326645	0.366796	0.436993	0.455632	ncl_hvc
AOAH	lman	hvc	0.57472	0.00111964	-0.470075	-0.443673	-0.410143	0.363165	0.415164	0.435263	0.531362	lman_hvc
AOAH	stri	hvc	0.719223	-0.0329909	-0.492089	-0.460494	-0.387421	0.232734	0.418129	0.473646	0.480808	stri_hvc
AOAH	hvc	ncl	0.553558	0.00565523	-0.494432	-0.439676	-0.336714	0.326645	0.366796	0.436993	0.455632	hvc_ncl
AOAH	nido	ncl	0.497579	-0.0130627	-0.539684	-0.452841	-0.407855	0.321854	0.396592	0.425124	0.449834	nido_ncl
AOAH	stri	ncl	0.521316	0.0271791	-0.47588	-0.423068	-0.346604	0.339118	0.40702	0.423435	0.508422	stri_ncl
AOAH	hvc	lman	0.57472	0.00111964	-0.470075	-0.443673	-0.410143	0.363165	0.415164	0.435263	0.531362	hvc_lman
AOAH	stri	lman	0.626152	-0.0183212	-0.449292	-0.415177	-0.355723	0.340996	0.381167	0.407373	0.419231	stri_lman
AOAH	ncl	nido	0.497579	-0.0130627	-0.539684	-0.452841	-0.407855	0.321854	0.396592	0.425124	0.449834	ncl_nido
AOAH	stri	x	0.770039	0.0302652	-0.415832	-0.386786	-0.319903	0.342625	0.455429	0.504455	0.613242	stri_x
AOAH	ra	stri	0.642791	-0.0151674	-0.686234	-0.62141	-0.432156	0.361999	0.432208	0.479214	0.599749	ra_stri
AOAH	hvc	stri	0.719223	-0.0329909	-0.492089	-0.460494	-0.387421	0.232734	0.418129	0.473646	0.480808	hvc_stri
AOAH	ncl	stri	0.521316	0.0271791	-0.47588	-0.423068	-0.346604	0.339118	0.40702	0.423435	0.508422	ncl_stri
AOAH	lman	stri	0.626152	-0.0183212	-0.449292	-0.415177	-0.355723	0.340996	0.381167	0.407373	0.419231	lman_stri
AOAH	x	stri	0.770039	0.0302652	-0.415832	-0.386786	-0.319903	0.342625	0.455429	0.504455	0.613242	x_stri
AP5S1	nido	hvc	0.63427	0.00220047	-0.535264	-0.471963	-0.403863	0.344178	0.376612	0.429407	0.456084	nido_hvc
AP5S1	hvc	nido	0.63427	0.00220047	-0.535264	-0.471963	-0.403863	0.344178	0.376612	0.429407	0.456084	hvc_nido
APBB1	lman	ra	0.504365	-0.0277067	-0.498958	-0.456606	-0.379651	0.216667	0.330811	0.365272	0.407995	lman_ra
APBB1	ncl	arco	0.5836	-0.00660836	-0.422921	-0.356073	-0.328759	0.284569	0.414026	0.486075	0.536814	ncl_arco
APBB1	lman	arco	0.444423	-0.0173551	-0.573129	-0.478117	-0.434382	0.326961	0.359894	0.370619	0.430281	lman_arco
APBB1	lman	hvc	0.594359	0.00553508	-0.470121	-0.398223	-0.35921	0.31068	0.357173	0.442002	0.517968	lman_hvc
APBB1	stri	hvc	0.486548	-0.0231034	-0.503477	-0.448502	-0.401044	0.301438	0.347902	0.426469	0.471066	stri_hvc
APBB1	arco	ncl	0.5836	-0.00660836	-0.422921	-0.356073	-0.328759	0.284569	0.414026	0.486075	0.536814	arco_ncl
APBB1	ra	lman	0.504365	-0.0277067	-0.498958	-0.456606	-0.379651	0.216667	0.330811	0.365272	0.407995	ra_lman
APBB1	arco	lman	0.444423	-0.0173551	-0.573129	-0.478117	-0.434382	0.326961	0.359894	0.370619	0.430281	arco_lman
APBB1	hvc	lman	0.594359	0.00553508	-0.470121	-0.398223	-0.35921	0.31068	0.357173	0.442002	0.517968	hvc_lman
APBB1	hvc	stri	0.486548	-0.0231034	-0.503477	-0.448502	-0.401044	0.301438	0.347902	0.426469	0.471066	hvc_stri
APLF	lman	ra	0.540129	0.0151502	-0.501922	-0.419486	-0.396267	0.344089	0.396731	0.462811	0.539464	lman_ra
APLF	stri	ra	0.618684	0.0244638	-0.597818	-0.466129	-0.350989	0.359911	0.465792	0.498891	0.550319	stri_ra
APLF	hvc	arco	0.744839	0.00519247	-0.608871	-0.523256	-0.394822	0.356596	0.444986	0.481796	0.487443	hvc_arco
APLF	ncl	arco	0.576162	-0.00603383	-0.414885	-0.384066	-0.349612	0.271546	0.365254	0.449236	0.553343	ncl_arco
APLF	arco	hvc	0.744839	0.00519247	-0.608871	-0.523256	-0.394822	0.356596	0.444986	0.481796	0.487443	arco_hvc
APLF	ncl	hvc	0.492274	0.0140481	-0.548042	-0.527821	-0.406831	0.322401	0.395979	0.442074	0.481939	ncl_hvc
APLF	lman	hvc	0.691155	-0.0059013	-0.517243	-0.466689	-0.424807	0.328632	0.382446	0.423592	0.478759	lman_hvc
APLF	arco	ncl	0.576162	-0.00603383	-0.414885	-0.384066	-0.349612	0.271546	0.365254	0.449236	0.553343	arco_ncl
APLF	hvc	ncl	0.492274	0.0140481	-0.548042	-0.527821	-0.406831	0.322401	0.395979	0.442074	0.481939	hvc_ncl
APLF	ra	lman	0.540129	0.0151502	-0.501922	-0.419486	-0.396267	0.344089	0.396731	0.462811	0.539464	ra_lman
APLF	hvc	lman	0.691155	-0.0059013	-0.517243	-0.466689	-0.424807	0.328632	0.382446	0.423592	0.478759	hvc_lman
APLF	stri	lman	0.452296	-0.0439565	-0.628448	-0.611235	-0.544875	0.296674	0.322007	0.365178	0.39978	stri_lman
APLF	stri	nido	0.570257	0.0140055	-0.54216	-0.504715	-0.456961	0.417793	0.471205	0.493258	0.513863	stri_nido
APLF	ra	stri	0.618684	0.0244638	-0.597818	-0.466129	-0.350989	0.359911	0.465792	0.498891	0.550319	ra_stri
APLF	lman	stri	0.452296	-0.0439565	-0.628448	-0.611235	-0.544875	0.296674	0.322007	0.365178	0.39978	lman_stri
APLF	nido	stri	0.570257	0.0140055	-0.54216	-0.504715	-0.456961	0.417793	0.471205	0.493258	0.513863	nido_stri
APOPT1	arco	ra	0.519182	-0.00841232	-0.55209	-0.4692	-0.420985	0.280537	0.344228	0.411904	0.426611	arco_ra
APOPT1	stri	ra	0.603838	0.0150286	-0.415741	-0.401227	-0.369944	0.266041	0.444221	0.499953	0.517425	stri_ra
APOPT1	ra	arco	0.519182	-0.00841232	-0.55209	-0.4692	-0.420985	0.280537	0.344228	0.411904	0.426611	ra_arco
APOPT1	nido	arco	0.574019	0.038989	-0.44054	-0.413066	-0.384907	0.382637	0.494127	0.530451	0.552855	nido_arco
APOPT1	stri	arco	0.737881	0.0147109	-0.481187	-0.43334	-0.373243	0.337482	0.379855	0.455108	0.480969	stri_arco
APOPT1	ncl	hvc	0.483667	0.000593586	-0.464946	-0.440324	-0.402759	0.311542	0.343609	0.406546	0.435181	ncl_hvc
APOPT1	hvc	ncl	0.483667	0.000593586	-0.464946	-0.440324	-0.402759	0.311542	0.343609	0.406546	0.435181	hvc_ncl
APOPT1	arco	nido	0.574019	0.038989	-0.44054	-0.413066	-0.384907	0.382637	0.494127	0.530451	0.552855	arco_nido
APOPT1	ra	stri	0.603838	0.0150286	-0.415741	-0.401227	-0.369944	0.266041	0.444221	0.499953	0.517425	ra_stri
APOPT1	arco	stri	0.737881	0.0147109	-0.481187	-0.43334	-0.373243	0.337482	0.379855	0.455108	0.480969	arco_stri
AQP1	lman	ra	0.491716	-0.0320225	-0.602099	-0.524183	-0.456524	0.304738	0.407213	0.449509	0.462915	lman_ra
AQP1	nido	ncl	0.60964	-0.0170926	-0.445071	-0.384724	-0.367179	0.257429	0.383499	0.484944	0.519021	nido_ncl
AQP1	ra	lman	0.491716	-0.0320225	-0.602099	-0.524183	-0.456524	0.304738	0.407213	0.449509	0.462915	ra_lman
AQP1	ncl	nido	0.60964	-0.0170926	-0.445071	-0.384724	-0.367179	0.257429	0.383499	0.484944	0.519021	ncl_nido
AQP1	stri	x	0.723396	-0.0135864	-0.488291	-0.440845	-0.40205	0.364146	0.455291	0.498165	0.579087	stri_x
AQP1	x	stri	0.723396	-0.0135864	-0.488291	-0.440845	-0.40205	0.364146	0.455291	0.498165	0.579087	x_stri
ARFGAP2	nido	arco	0.514977	0.00529752	-0.547409	-0.511333	-0.445479	0.316614	0.35684	0.386585	0.465254	nido_arco
ARFGAP2	arco	nido	0.514977	0.00529752	-0.547409	-0.511333	-0.445479	0.316614	0.35684	0.386585	0.465254	arco_nido
ARHGAP10	nido	ncl	-0.629992	0.0166978	-0.472971	-0.433516	-0.400486	0.337509	0.415055	0.466414	0.498575	nido_ncl
ARHGAP10	ncl	nido	-0.629992	0.0166978	-0.472971	-0.433516	-0.400486	0.337509	0.415055	0.466414	0.498575	ncl_nido
ARHGAP10	x	nido	0.49238	0.015918	-0.422468	-0.397029	-0.372774	0.332653	0.383354	0.449573	0.483228	x_nido
ARHGAP10	nido	x	0.49238	0.015918	-0.422468	-0.397029	-0.372774	0.332653	0.383354	0.449573	0.483228	nido_x
ARHGAP22	arco	ra	0.492205	-0.0291907	-0.532773	-0.487933	-0.374033	0.327782	0.380845	0.403414	0.449755	arco_ra
ARHGAP22	nido	ra	0.770906	-0.0622262	-0.498288	-0.470734	-0.412539	0.197955	0.386772	0.428852	0.555436	nido_ra
ARHGAP22	x	ra	-0.687939	0.0225312	-0.403192	-0.386756	-0.337545	0.326253	0.343016	0.416653	0.516915	x_ra
ARHGAP22	ra	arco	0.492205	-0.0291907	-0.532773	-0.487933	-0.374033	0.327782	0.380845	0.403414	0.449755	ra_arco
ARHGAP22	ra	nido	0.770906	-0.0622262	-0.498288	-0.470734	-0.412539	0.197955	0.386772	0.428852	0.555436	ra_nido
ARHGAP22	ra	x	-0.687939	0.0225312	-0.403192	-0.386756	-0.337545	0.326253	0.343016	0.416653	0.516915	ra_x
ARHGAP44	x	lman	0.601448	0.00342246	-0.503827	-0.451479	-0.413395	0.324325	0.416216	0.530514	0.57769	x_lman
ARHGAP44	lman	x	0.601448	0.00342246	-0.503827	-0.451479	-0.413395	0.324325	0.416216	0.530514	0.57769	lman_x
ARL8A	arco	ra	0.72216	-0.012605	-0.489094	-0.438168	-0.36405	0.336168	0.357162	0.505901	0.561485	arco_ra
ARL8A	hvc	ra	0.491213	-0.01293	-0.439708	-0.402034	-0.352291	0.279677	0.402514	0.46298	0.489674	hvc_ra
ARL8A	lman	ra	0.563394	0.00256573	-0.45443	-0.382026	-0.346235	0.308839	0.334643	0.391967	0.499542	lman_ra
ARL8A	nido	ra	0.625658	0.0278902	-0.570685	-0.529516	-0.450618	0.343827	0.380612	0.445162	0.485759	nido_ra
ARL8A	x	ra	0.801444	-0.0481783	-0.495933	-0.455226	-0.411284	0.313785	0.439337	0.495195	0.550868	x_ra
ARL8A	stri	ra	0.544857	-0.0346631	-0.48508	-0.446179	-0.392718	0.25173	0.363354	0.463552	0.49185	stri_ra
ARL8A	ra	arco	0.72216	-0.012605	-0.489094	-0.438168	-0.36405	0.336168	0.357162	0.505901	0.561485	ra_arco
ARL8A	hvc	arco	0.754845	0.0208504	-0.474749	-0.454181	-0.339085	0.359265	0.460322	0.545167	0.579539	hvc_arco
ARL8A	ncl	arco	0.546134	-0.00230398	-0.525168	-0.389175	-0.351332	0.318687	0.390935	0.450112	0.51359	ncl_arco
ARL8A	lman	arco	0.608746	0.000519996	-0.461193	-0.440152	-0.418303	0.343883	0.409825	0.446604	0.502835	lman_arco
ARL8A	nido	arco	0.744387	0.0125174	-0.442815	-0.399677	-0.351985	0.31287	0.404999	0.568163	0.637879	nido_arco
ARL8A	x	arco	0.652123	0.0108487	-0.403964	-0.362883	-0.340812	0.355132	0.406241	0.453758	0.585007	x_arco
ARL8A	ra	hvc	0.491213	-0.01293	-0.439708	-0.402034	-0.352291	0.279677	0.402514	0.46298	0.489674	ra_hvc
ARL8A	arco	hvc	0.754845	0.0208504	-0.474749	-0.454181	-0.339085	0.359265	0.460322	0.545167	0.579539	arco_hvc
ARL8A	nido	hvc	0.58984	-0.0129669	-0.526792	-0.498638	-0.449317	0.287805	0.314748	0.387995	0.568565	nido_hvc
ARL8A	x	hvc	0.523955	0.0276793	-0.515826	-0.39882	-0.334646	0.309444	0.420237	0.446907	0.477495	x_hvc
ARL8A	arco	ncl	0.546134	-0.00230398	-0.525168	-0.389175	-0.351332	0.318687	0.390935	0.450112	0.51359	arco_ncl
ARL8A	ra	lman	0.563394	0.00256573	-0.45443	-0.382026	-0.346235	0.308839	0.334643	0.391967	0.499542	ra_lman
ARL8A	arco	lman	0.608746	0.000519996	-0.461193	-0.440152	-0.418303	0.343883	0.409825	0.446604	0.502835	arco_lman
ARL8A	nido	lman	0.726009	0.0271191	-0.455825	-0.450974	-0.383774	0.310138	0.388534	0.410965	0.453242	nido_lman
ARL8A	x	lman	0.59327	-0.00865629	-0.578967	-0.522068	-0.484372	0.34089	0.441992	0.458487	0.535866	x_lman
ARL8A	stri	lman	0.844725	0.0529549	-0.466256	-0.381204	-0.354354	0.364797	0.449931	0.50747	0.584594	stri_lman
ARL8A	ra	nido	0.625658	0.0278902	-0.570685	-0.529516	-0.450618	0.343827	0.380612	0.445162	0.485759	ra_nido
ARL8A	arco	nido	0.744387	0.0125174	-0.442815	-0.399677	-0.351985	0.31287	0.404999	0.568163	0.637879	arco_nido
ARL8A	hvc	nido	0.58984	-0.0129669	-0.526792	-0.498638	-0.449317	0.287805	0.314748	0.387995	0.568565	hvc_nido
ARL8A	lman	nido	0.726009	0.0271191	-0.455825	-0.450974	-0.383774	0.310138	0.388534	0.410965	0.453242	lman_nido
ARL8A	x	nido	0.70112	-0.00196879	-0.486255	-0.438357	-0.36576	0.231364	0.341784	0.482174	0.634704	x_nido
ARL8A	stri	nido	0.63601	0.00646753	-0.481372	-0.461241	-0.430619	0.340057	0.401672	0.497209	0.560794	stri_nido
ARL8A	ra	x	0.801444	-0.0481783	-0.495933	-0.455226	-0.411284	0.313785	0.439337	0.495195	0.550868	ra_x
ARL8A	arco	x	0.652123	0.0108487	-0.403964	-0.362883	-0.340812	0.355132	0.406241	0.453758	0.585007	arco_x
ARL8A	hvc	x	0.523955	0.0276793	-0.515826	-0.39882	-0.334646	0.309444	0.420237	0.446907	0.477495	hvc_x
ARL8A	lman	x	0.59327	-0.00865629	-0.578967	-0.522068	-0.484372	0.34089	0.441992	0.458487	0.535866	lman_x
ARL8A	nido	x	0.70112	-0.00196879	-0.486255	-0.438357	-0.36576	0.231364	0.341784	0.482174	0.634704	nido_x
ARL8A	stri	x	0.557709	0.028698	-0.489291	-0.420831	-0.370207	0.311289	0.389867	0.441648	0.513355	stri_x
ARL8A	ra	stri	0.544857	-0.0346631	-0.48508	-0.446179	-0.392718	0.25173	0.363354	0.463552	0.49185	ra_stri
ARL8A	lman	stri	0.844725	0.0529549	-0.466256	-0.381204	-0.354354	0.364797	0.449931	0.50747	0.584594	lman_stri
ARL8A	nido	stri	0.63601	0.00646753	-0.481372	-0.461241	-0.430619	0.340057	0.401672	0.497209	0.560794	nido_stri
ARL8A	x	stri	0.557709	0.028698	-0.489291	-0.420831	-0.370207	0.311289	0.389867	0.441648	0.513355	x_stri
ARMC2	stri	arco	0.558844	0.00203571	-0.532656	-0.478844	-0.406914	0.307752	0.376997	0.418115	0.470281	stri_arco
ARMC2	arco	stri	0.558844	0.00203571	-0.532656	-0.478844	-0.406914	0.307752	0.376997	0.418115	0.470281	arco_stri
ARMC7	ncl	ra	0.542492	-0.0110959	-0.511324	-0.478252	-0.403755	0.319967	0.392389	0.405699	0.409323	ncl_ra
ARMC7	lman	ra	0.67026	0.0202029	-0.544765	-0.452684	-0.395739	0.292591	0.372521	0.403315	0.423175	lman_ra
ARMC7	ra	ncl	0.542492	-0.0110959	-0.511324	-0.478252	-0.403755	0.319967	0.392389	0.405699	0.409323	ra_ncl
ARMC7	lman	ncl	0.358032	-0.0517719	-0.60125	-0.522265	-0.424833	0.248632	0.306009	0.328779	0.336383	lman_ncl
ARMC7	ra	lman	0.67026	0.0202029	-0.544765	-0.452684	-0.395739	0.292591	0.372521	0.403315	0.423175	ra_lman
ARMC7	ncl	lman	0.358032	-0.0517719	-0.60125	-0.522265	-0.424833	0.248632	0.306009	0.328779	0.336383	ncl_lman
ARMC7	nido	lman	0.709441	-0.00808663	-0.553118	-0.380056	-0.338039	0.291954	0.429263	0.508647	0.527989	nido_lman
ARMC7	lman	nido	0.709441	-0.00808663	-0.553118	-0.380056	-0.338039	0.291954	0.429263	0.508647	0.527989	lman_nido
ARSK	lman	ncl	0.3466	-0.0362039	-0.552754	-0.479361	-0.435863	0.216312	0.285718	0.32085	0.346534	lman_ncl
ARSK	ncl	lman	0.3466	-0.0362039	-0.552754	-0.479361	-0.435863	0.216312	0.285718	0.32085	0.346534	ncl_lman
ARSK	nido	lman	0.658317	-0.0147887	-0.670308	-0.56846	-0.47581	0.299617	0.387366	0.476783	0.614607	nido_lman
ARSK	lman	nido	0.658317	-0.0147887	-0.670308	-0.56846	-0.47581	0.299617	0.387366	0.476783	0.614607	lman_nido
ASAH1	arco	ra	0.780035	0.0261498	-0.41911	-0.394105	-0.352403	0.293556	0.33357	0.409951	0.46072	arco_ra
ASAH1	hvc	ra	0.461838	0.00667119	-0.46621	-0.414276	-0.384774	0.348048	0.412164	0.420492	0.437869	hvc_ra
ASAH1	ncl	ra	0.47802	0.0121408	-0.439664	-0.351292	-0.338008	0.273983	0.337691	0.367886	0.442173	ncl_ra
ASAH1	lman	ra	0.600013	-0.0192652	-0.633134	-0.481957	-0.419134	0.300754	0.370016	0.432764	0.492759	lman_ra
ASAH1	ra	arco	0.780035	0.0261498	-0.41911	-0.394105	-0.352403	0.293556	0.33357	0.409951	0.46072	ra_arco
ASAH1	hvc	arco	0.463805	-0.0207472	-0.476567	-0.390092	-0.365668	0.303481	0.38359	0.440117	0.444041	hvc_arco
ASAH1	nido	arco	0.481379	-0.0397656	-0.510132	-0.484038	-0.436637	0.309701	0.381764	0.405952	0.431486	nido_arco
ASAH1	stri	arco	0.498732	-0.00940144	-0.519511	-0.459544	-0.403743	0.306165	0.368656	0.392161	0.458316	stri_arco
ASAH1	ra	hvc	0.461838	0.00667119	-0.46621	-0.414276	-0.384774	0.348048	0.412164	0.420492	0.437869	ra_hvc
ASAH1	arco	hvc	0.463805	-0.0207472	-0.476567	-0.390092	-0.365668	0.303481	0.38359	0.440117	0.444041	arco_hvc
ASAH1	ncl	hvc	0.637706	0.0518855	-0.484666	-0.473924	-0.326901	0.313823	0.386148	0.463641	0.56806	ncl_hvc
ASAH1	lman	hvc	0.504725	-0.0268149	-0.533282	-0.48677	-0.360112	0.256602	0.35375	0.440383	0.489959	lman_hvc
ASAH1	ra	ncl	0.47802	0.0121408	-0.439664	-0.351292	-0.338008	0.273983	0.337691	0.367886	0.442173	ra_ncl
ASAH1	hvc	ncl	0.637706	0.0518855	-0.484666	-0.473924	-0.326901	0.313823	0.386148	0.463641	0.56806	hvc_ncl
ASAH1	lman	ncl	0.639411	-0.0338636	-0.4271	-0.418002	-0.405694	0.303565	0.347338	0.37869	0.417303	lman_ncl
ASAH1	nido	ncl	0.703021	0.022503	-0.343581	-0.31492	-0.30242	0.32203	0.381966	0.471398	0.520722	nido_ncl
ASAH1	stri	ncl	0.532729	0.0554496	-0.369496	-0.35525	-0.32542	0.356585	0.468137	0.492593	0.519896	stri_ncl
ASAH1	ra	lman	0.600013	-0.0192652	-0.633134	-0.481957	-0.419134	0.300754	0.370016	0.432764	0.492759	ra_lman
ASAH1	hvc	lman	0.504725	-0.0268149	-0.533282	-0.48677	-0.360112	0.256602	0.35375	0.440383	0.489959	hvc_lman
ASAH1	ncl	lman	0.639411	-0.0338636	-0.4271	-0.418002	-0.405694	0.303565	0.347338	0.37869	0.417303	ncl_lman
ASAH1	x	lman	0.615275	0.0210375	-0.492336	-0.466492	-0.33176	0.309827	0.36738	0.470026	0.499666	x_lman
ASAH1	arco	nido	0.481379	-0.0397656	-0.510132	-0.484038	-0.436637	0.309701	0.381764	0.405952	0.431486	arco_nido
ASAH1	ncl	nido	0.703021	0.022503	-0.343581	-0.31492	-0.30242	0.32203	0.381966	0.471398	0.520722	ncl_nido
ASAH1	lman	x	0.615275	0.0210375	-0.492336	-0.466492	-0.33176	0.309827	0.36738	0.470026	0.499666	lman_x
ASAH1	arco	stri	0.498732	-0.00940144	-0.519511	-0.459544	-0.403743	0.306165	0.368656	0.392161	0.458316	arco_stri
ASAH1	ncl	stri	0.532729	0.0554496	-0.369496	-0.35525	-0.32542	0.356585	0.468137	0.492593	0.519896	ncl_stri
ASCC3	arco	ra	0.561652	0.0292305	-0.46993	-0.442325	-0.344012	0.323558	0.404387	0.436911	0.476604	arco_ra
ASCC3	lman	ra	0.69031	-0.0569119	-0.512721	-0.47096	-0.417112	0.195058	0.249308	0.306174	0.383005	lman_ra
ASCC3	ra	arco	0.561652	0.0292305	-0.46993	-0.442325	-0.344012	0.323558	0.404387	0.436911	0.476604	ra_arco
ASCC3	lman	arco	0.494314	0.00734693	-0.501027	-0.460218	-0.396899	0.319962	0.373204	0.422116	0.43711	lman_arco
ASCC3	ra	lman	0.69031	-0.0569119	-0.512721	-0.47096	-0.417112	0.195058	0.249308	0.306174	0.383005	ra_lman
ASCC3	arco	lman	0.494314	0.00734693	-0.501027	-0.460218	-0.396899	0.319962	0.373204	0.422116	0.43711	arco_lman
ASCC3	nido	lman	-0.492676	-0.0201479	-0.477856	-0.458984	-0.407642	0.314345	0.411465	0.452931	0.474812	nido_lman
ASCC3	lman	nido	-0.492676	-0.0201479	-0.477856	-0.458984	-0.407642	0.314345	0.411465	0.452931	0.474812	lman_nido
ASNA1	arco	ra	0.673162	-0.0275629	-0.454261	-0.439111	-0.404477	0.242841	0.283943	0.30962	0.415883	arco_ra
ASNA1	hvc	ra	0.777841	0.0222499	-0.528216	-0.459903	-0.362049	0.347626	0.398605	0.489243	0.514948	hvc_ra
ASNA1	ncl	ra	0.713712	0.0406661	-0.434751	-0.408037	-0.315911	0.351491	0.458273	0.492255	0.530291	ncl_ra
ASNA1	lman	ra	0.802167	0.0120597	-0.438804	-0.360243	-0.303761	0.30333	0.343	0.385466	0.405421	lman_ra
ASNA1	x	ra	0.771899	-0.0362154	-0.626607	-0.549944	-0.521924	0.284132	0.357034	0.411334	0.559803	x_ra
ASNA1	stri	ra	0.641974	-0.00674804	-0.479452	-0.474605	-0.406514	0.301119	0.352251	0.446255	0.497285	stri_ra
ASNA1	ra	arco	0.673162	-0.0275629	-0.454261	-0.439111	-0.404477	0.242841	0.283943	0.30962	0.415883	ra_arco
ASNA1	hvc	arco	0.680681	0.0532306	-0.450315	-0.400963	-0.355297	0.353497	0.389699	0.464851	0.504406	hvc_arco
ASNA1	ncl	arco	0.545921	-0.0397993	-0.539901	-0.490517	-0.413496	0.282048	0.398626	0.427141	0.542551	ncl_arco
ASNA1	lman	arco	0.621993	-0.0473709	-0.527278	-0.453194	-0.382431	0.242122	0.276784	0.365028	0.490411	lman_arco
ASNA1	nido	arco	0.635591	-0.00151981	-0.54586	-0.436668	-0.395763	0.315985	0.40921	0.526467	0.572496	nido_arco
ASNA1	x	arco	0.81555	-0.0019125	-0.456139	-0.433475	-0.366494	0.264515	0.374059	0.445564	0.464562	x_arco
ASNA1	stri	arco	0.792596	-0.0119938	-0.537723	-0.498222	-0.47737	0.319721	0.377547	0.450473	0.482258	stri_arco
ASNA1	ra	hvc	0.777841	0.0222499	-0.528216	-0.459903	-0.362049	0.347626	0.398605	0.489243	0.514948	ra_hvc
ASNA1	arco	hvc	0.680681	0.0532306	-0.450315	-0.400963	-0.355297	0.353497	0.389699	0.464851	0.504406	arco_hvc
ASNA1	ncl	hvc	0.593915	0.0307589	-0.562894	-0.436858	-0.352909	0.383953	0.470904	0.493449	0.542227	ncl_hvc
ASNA1	lman	hvc	0.712307	0.0102848	-0.458011	-0.426802	-0.375165	0.299651	0.336511	0.412063	0.522831	lman_hvc
ASNA1	x	hvc	0.705884	-0.0258457	-0.51056	-0.496702	-0.413702	0.261313	0.346737	0.412882	0.455119	x_hvc
ASNA1	stri	hvc	0.694804	0.0202951	-0.552164	-0.504245	-0.448617	0.381849	0.469465	0.556271	0.686383	stri_hvc
ASNA1	ra	ncl	0.713712	0.0406661	-0.434751	-0.408037	-0.315911	0.351491	0.458273	0.492255	0.530291	ra_ncl
ASNA1	arco	ncl	0.545921	-0.0397993	-0.539901	-0.490517	-0.413496	0.282048	0.398626	0.427141	0.542551	arco_ncl
ASNA1	hvc	ncl	0.593915	0.0307589	-0.562894	-0.436858	-0.352909	0.383953	0.470904	0.493449	0.542227	hvc_ncl
ASNA1	lman	ncl	0.685027	0.00611603	-0.49565	-0.481257	-0.418634	0.318912	0.369005	0.422213	0.512393	lman_ncl
ASNA1	x	ncl	0.532964	-0.0194071	-0.476714	-0.438497	-0.385764	0.326286	0.376803	0.384996	0.523587	x_ncl
ASNA1	stri	ncl	0.619392	-3.89984e-05	-0.391678	-0.318545	-0.293903	0.332681	0.379673	0.470335	0.493375	stri_ncl
ASNA1	ra	lman	0.802167	0.0120597	-0.438804	-0.360243	-0.303761	0.30333	0.343	0.385466	0.405421	ra_lman
ASNA1	arco	lman	0.621993	-0.0473709	-0.527278	-0.453194	-0.382431	0.242122	0.276784	0.365028	0.490411	arco_lman
ASNA1	hvc	lman	0.712307	0.0102848	-0.458011	-0.426802	-0.375165	0.299651	0.336511	0.412063	0.522831	hvc_lman
ASNA1	ncl	lman	0.685027	0.00611603	-0.49565	-0.481257	-0.418634	0.318912	0.369005	0.422213	0.512393	ncl_lman
ASNA1	x	lman	0.834153	0.0246261	-0.396618	-0.383678	-0.308931	0.343853	0.420886	0.506556	0.538192	x_lman
ASNA1	stri	lman	0.730472	0.0393685	-0.619424	-0.578629	-0.460426	0.41479	0.504746	0.527841	0.571256	stri_lman
ASNA1	arco	nido	0.635591	-0.00151981	-0.54586	-0.436668	-0.395763	0.315985	0.40921	0.526467	0.572496	arco_nido
ASNA1	x	nido	0.684498	0.00743334	-0.515493	-0.501506	-0.448823	0.395948	0.467864	0.496674	0.597809	x_nido
ASNA1	stri	nido	0.65336	0.0134195	-0.440961	-0.413958	-0.36593	0.302253	0.35748	0.471051	0.573798	stri_nido
ASNA1	ra	x	0.771899	-0.0362154	-0.626607	-0.549944	-0.521924	0.284132	0.357034	0.411334	0.559803	ra_x
ASNA1	arco	x	0.81555	-0.0019125	-0.456139	-0.433475	-0.366494	0.264515	0.374059	0.445564	0.464562	arco_x
ASNA1	hvc	x	0.705884	-0.0258457	-0.51056	-0.496702	-0.413702	0.261313	0.346737	0.412882	0.455119	hvc_x
ASNA1	ncl	x	0.532964	-0.0194071	-0.476714	-0.438497	-0.385764	0.326286	0.376803	0.384996	0.523587	ncl_x
ASNA1	lman	x	0.834153	0.0246261	-0.396618	-0.383678	-0.308931	0.343853	0.420886	0.506556	0.538192	lman_x
ASNA1	nido	x	0.684498	0.00743334	-0.515493	-0.501506	-0.448823	0.395948	0.467864	0.496674	0.597809	nido_x
ASNA1	stri	x	0.849092	0.037975	-0.545649	-0.368278	-0.337822	0.34327	0.420239	0.45404	0.638993	stri_x
ASNA1	ra	stri	0.641974	-0.00674804	-0.479452	-0.474605	-0.406514	0.301119	0.352251	0.446255	0.497285	ra_stri
ASNA1	arco	stri	0.792596	-0.0119938	-0.537723	-0.498222	-0.47737	0.319721	0.377547	0.450473	0.482258	arco_stri
ASNA1	hvc	stri	0.694804	0.0202951	-0.552164	-0.504245	-0.448617	0.381849	0.469465	0.556271	0.686383	hvc_stri
ASNA1	ncl	stri	0.619392	-3.89984e-05	-0.391678	-0.318545	-0.293903	0.332681	0.379673	0.470335	0.493375	ncl_stri
ASNA1	lman	stri	0.730472	0.0393685	-0.619424	-0.578629	-0.460426	0.41479	0.504746	0.527841	0.571256	lman_stri
ASNA1	nido	stri	0.65336	0.0134195	-0.440961	-0.413958	-0.36593	0.302253	0.35748	0.471051	0.573798	nido_stri
ASNA1	x	stri	0.849092	0.037975	-0.545649	-0.368278	-0.337822	0.34327	0.420239	0.45404	0.638993	x_stri
ASPG	hvc	ra	0.424593	-0.0293546	-0.536431	-0.486064	-0.404003	0.28476	0.351624	0.383271	0.405963	hvc_ra
ASPG	ra	hvc	0.424593	-0.0293546	-0.536431	-0.486064	-0.404003	0.28476	0.351624	0.383271	0.405963	ra_hvc
ASPG	stri	hvc	0.562453	-0.00986255	-0.480386	-0.432869	-0.375471	0.244134	0.300544	0.338077	0.342753	stri_hvc
ASPG	nido	ncl	0.547085	-0.0459782	-0.493702	-0.439786	-0.390337	0.275947	0.351315	0.39103	0.397717	nido_ncl
ASPG	nido	lman	0.444089	-0.0126977	-0.438109	-0.411117	-0.357717	0.296836	0.339989	0.401299	0.433964	nido_lman
ASPG	ncl	nido	0.547085	-0.0459782	-0.493702	-0.439786	-0.390337	0.275947	0.351315	0.39103	0.397717	ncl_nido
ASPG	lman	nido	0.444089	-0.0126977	-0.438109	-0.411117	-0.357717	0.296836	0.339989	0.401299	0.433964	lman_nido
ASPG	x	nido	0.652072	0.0179682	-0.371394	-0.346908	-0.324981	0.288081	0.439046	0.52255	0.547231	x_nido
ASPG	stri	nido	0.536646	-0.0205407	-0.549999	-0.459137	-0.390231	0.285427	0.329373	0.414603	0.436952	stri_nido
ASPG	nido	x	0.652072	0.0179682	-0.371394	-0.346908	-0.324981	0.288081	0.439046	0.52255	0.547231	nido_x
ASPG	hvc	stri	0.562453	-0.00986255	-0.480386	-0.432869	-0.375471	0.244134	0.300544	0.338077	0.342753	hvc_stri
ASPG	nido	stri	0.536646	-0.0205407	-0.549999	-0.459137	-0.390231	0.285427	0.329373	0.414603	0.436952	nido_stri
ASPH	lman	arco	0.601602	-0.0307102	-0.557842	-0.485054	-0.393315	0.235294	0.346447	0.384102	0.416726	lman_arco
ASPH	lman	hvc	-0.624087	0.011239	-0.462186	-0.438839	-0.39028	0.368866	0.413656	0.59834	0.688164	lman_hvc
ASPH	arco	lman	0.601602	-0.0307102	-0.557842	-0.485054	-0.393315	0.235294	0.346447	0.384102	0.416726	arco_lman
ASPH	hvc	lman	-0.624087	0.011239	-0.462186	-0.438839	-0.39028	0.368866	0.413656	0.59834	0.688164	hvc_lman
ASS1	hvc	ra	0.457958	-0.00870209	-0.577852	-0.48304	-0.349604	0.288396	0.346922	0.370447	0.395474	hvc_ra
ASS1	stri	ra	0.593829	0.0114946	-0.46852	-0.432768	-0.371481	0.295841	0.389012	0.450047	0.55495	stri_ra
ASS1	hvc	arco	0.715699	0.0187408	-0.534572	-0.441318	-0.418059	0.320195	0.368192	0.431253	0.668361	hvc_arco
ASS1	stri	arco	0.641885	0.0055862	-0.603608	-0.463809	-0.40326	0.377843	0.452839	0.483515	0.613123	stri_arco
ASS1	ra	hvc	0.457958	-0.00870209	-0.577852	-0.48304	-0.349604	0.288396	0.346922	0.370447	0.395474	ra_hvc
ASS1	arco	hvc	0.715699	0.0187408	-0.534572	-0.441318	-0.418059	0.320195	0.368192	0.431253	0.668361	arco_hvc
ASS1	ncl	hvc	0.56548	-0.00181498	-0.489618	-0.445527	-0.401593	0.273843	0.331762	0.367199	0.419865	ncl_hvc
ASS1	stri	hvc	0.543011	0.00518552	-0.487124	-0.463456	-0.412491	0.332488	0.355619	0.419002	0.513881	stri_hvc
ASS1	hvc	ncl	0.56548	-0.00181498	-0.489618	-0.445527	-0.401593	0.273843	0.331762	0.367199	0.419865	hvc_ncl
ASS1	nido	lman	0.604714	0.00391086	-0.512477	-0.466627	-0.346368	0.292862	0.366093	0.423326	0.489653	nido_lman
ASS1	lman	nido	0.604714	0.00391086	-0.512477	-0.466627	-0.346368	0.292862	0.366093	0.423326	0.489653	lman_nido
ASS1	ra	stri	0.593829	0.0114946	-0.46852	-0.432768	-0.371481	0.295841	0.389012	0.450047	0.55495	ra_stri
ASS1	arco	stri	0.641885	0.0055862	-0.603608	-0.463809	-0.40326	0.377843	0.452839	0.483515	0.613123	arco_stri
ASS1	hvc	stri	0.543011	0.00518552	-0.487124	-0.463456	-0.412491	0.332488	0.355619	0.419002	0.513881	hvc_stri
ASTN2	hvc	ra	0.52529	0.0102776	-0.45929	-0.418807	-0.365446	0.354446	0.421971	0.451115	0.48886	hvc_ra
ASTN2	ncl	ra	0.474023	-0.000536945	-0.458174	-0.385732	-0.35054	0.24658	0.294286	0.344334	0.377325	ncl_ra
ASTN2	x	ra	0.609447	-0.0148784	-0.458377	-0.437675	-0.417704	0.301362	0.363038	0.46184	0.519433	x_ra
ASTN2	ra	hvc	0.52529	0.0102776	-0.45929	-0.418807	-0.365446	0.354446	0.421971	0.451115	0.48886	ra_hvc
ASTN2	x	hvc	0.608222	0.0226251	-0.529269	-0.449458	-0.363925	0.366298	0.445892	0.478164	0.519161	x_hvc
ASTN2	stri	hvc	0.438269	-0.0340481	-0.644895	-0.517795	-0.39871	0.257061	0.333738	0.381702	0.419899	stri_hvc
ASTN2	ra	ncl	0.474023	-0.000536945	-0.458174	-0.385732	-0.35054	0.24658	0.294286	0.344334	0.377325	ra_ncl
ASTN2	x	ncl	0.48607	0.0364243	-0.467314	-0.463085	-0.406851	0.355364	0.402884	0.451149	0.476588	x_ncl
ASTN2	x	lman	0.620247	-0.0286701	-0.467249	-0.444683	-0.409737	0.295696	0.4279	0.464728	0.557574	x_lman
ASTN2	ra	x	0.609447	-0.0148784	-0.458377	-0.437675	-0.417704	0.301362	0.363038	0.46184	0.519433	ra_x
ASTN2	hvc	x	0.608222	0.0226251	-0.529269	-0.449458	-0.363925	0.366298	0.445892	0.478164	0.519161	hvc_x
ASTN2	ncl	x	0.48607	0.0364243	-0.467314	-0.463085	-0.406851	0.355364	0.402884	0.451149	0.476588	ncl_x
ASTN2	lman	x	0.620247	-0.0286701	-0.467249	-0.444683	-0.409737	0.295696	0.4279	0.464728	0.557574	lman_x
ASTN2	hvc	stri	0.438269	-0.0340481	-0.644895	-0.517795	-0.39871	0.257061	0.333738	0.381702	0.419899	hvc_stri
ATG14	x	nido	0.512442	0.0176541	-0.497159	-0.402688	-0.373886	0.348469	0.436375	0.441167	0.498312	x_nido
ATG14	nido	x	0.512442	0.0176541	-0.497159	-0.402688	-0.373886	0.348469	0.436375	0.441167	0.498312	nido_x
ATG14	stri	x	0.518251	-0.0236637	-0.459472	-0.446606	-0.412566	0.312998	0.398005	0.444679	0.497875	stri_x
ATG14	x	stri	0.518251	-0.0236637	-0.459472	-0.446606	-0.412566	0.312998	0.398005	0.444679	0.497875	x_stri
ATP1A1	lman	ra	0.481539	0.00982584	-0.42593	-0.374626	-0.350218	0.292803	0.344616	0.35732	0.377449	lman_ra
ATP1A1	nido	arco	0.58604	-0.00131668	-0.557033	-0.545052	-0.452051	0.304898	0.372111	0.451151	0.47896	nido_arco
ATP1A1	ra	lman	0.481539	0.00982584	-0.42593	-0.374626	-0.350218	0.292803	0.344616	0.35732	0.377449	ra_lman
ATP1A1	arco	nido	0.58604	-0.00131668	-0.557033	-0.545052	-0.452051	0.304898	0.372111	0.451151	0.47896	arco_nido
ATP1A1	stri	x	0.443504	0.0153072	-0.356915	-0.328578	-0.305685	0.305953	0.341792	0.407793	0.433186	stri_x
ATP1A1	x	stri	0.443504	0.0153072	-0.356915	-0.328578	-0.305685	0.305953	0.341792	0.407793	0.433186	x_stri
ATP1A2	arco	ra	0.841485	0.00500743	-0.531501	-0.505681	-0.451573	0.318941	0.367567	0.445163	0.472858	arco_ra
ATP1A2	ncl	ra	0.733977	0.011243	-0.486757	-0.458461	-0.38304	0.352329	0.410385	0.454166	0.538378	ncl_ra
ATP1A2	lman	ra	0.685241	0.00703779	-0.527265	-0.414109	-0.358477	0.305149	0.411275	0.516161	0.614626	lman_ra
ATP1A2	nido	ra	0.605556	0.0299889	-0.413197	-0.398916	-0.305335	0.370631	0.528247	0.561585	0.601163	nido_ra
ATP1A2	x	ra	0.752344	-0.0138182	-0.529958	-0.526915	-0.473785	0.302539	0.391664	0.425838	0.498881	x_ra
ATP1A2	stri	ra	0.658631	0.000643601	-0.581433	-0.480988	-0.382445	0.314847	0.397357	0.459807	0.470936	stri_ra
ATP1A2	ra	arco	0.841485	0.00500743	-0.531501	-0.505681	-0.451573	0.318941	0.367567	0.445163	0.472858	ra_arco
ATP1A2	hvc	arco	0.561207	0.00133921	-0.485507	-0.440715	-0.409317	0.306797	0.37375	0.403676	0.440513	hvc_arco
ATP1A2	ncl	arco	0.770972	-0.00106243	-0.572852	-0.501884	-0.423178	0.294303	0.348007	0.407146	0.449033	ncl_arco
ATP1A2	lman	arco	0.72291	0.0359905	-0.463919	-0.43799	-0.402736	0.359467	0.450224	0.53114	0.562344	lman_arco
ATP1A2	nido	arco	0.676484	0.0153154	-0.552615	-0.456271	-0.418643	0.350381	0.432641	0.468695	0.617535	nido_arco
ATP1A2	x	arco	0.740324	0.0680923	-0.59211	-0.535153	-0.448611	0.38662	0.443071	0.515996	0.521933	x_arco
ATP1A2	stri	arco	0.688021	-0.0300439	-0.574272	-0.458855	-0.370188	0.253535	0.302432	0.342683	0.387296	stri_arco
ATP1A2	arco	hvc	0.561207	0.00133921	-0.485507	-0.440715	-0.409317	0.306797	0.37375	0.403676	0.440513	arco_hvc
ATP1A2	ncl	hvc	0.579311	0.00264125	-0.482248	-0.429729	-0.359277	0.295427	0.370941	0.378458	0.482907	ncl_hvc
ATP1A2	ra	ncl	0.733977	0.011243	-0.486757	-0.458461	-0.38304	0.352329	0.410385	0.454166	0.538378	ra_ncl
ATP1A2	arco	ncl	0.770972	-0.00106243	-0.572852	-0.501884	-0.423178	0.294303	0.348007	0.407146	0.449033	arco_ncl
ATP1A2	hvc	ncl	0.579311	0.00264125	-0.482248	-0.429729	-0.359277	0.295427	0.370941	0.378458	0.482907	hvc_ncl
ATP1A2	x	ncl	0.584646	0.0335086	-0.478995	-0.411003	-0.348724	0.327188	0.376736	0.509003	0.526484	x_ncl
ATP1A2	stri	ncl	0.552513	0.0173953	-0.56834	-0.527987	-0.388221	0.33011	0.392312	0.417627	0.514808	stri_ncl
ATP1A2	ra	lman	0.685241	0.00703779	-0.527265	-0.414109	-0.358477	0.305149	0.411275	0.516161	0.614626	ra_lman
ATP1A2	arco	lman	0.72291	0.0359905	-0.463919	-0.43799	-0.402736	0.359467	0.450224	0.53114	0.562344	arco_lman
ATP1A2	nido	lman	0.779403	0.0345123	-0.444402	-0.34762	-0.333039	0.390085	0.450854	0.460087	0.480015	nido_lman
ATP1A2	x	lman	0.799352	-0.00926923	-0.556891	-0.489877	-0.41557	0.292197	0.323877	0.356619	0.528082	x_lman
ATP1A2	stri	lman	0.860957	-0.0241238	-0.485527	-0.437881	-0.41679	0.277333	0.327028	0.353338	0.365507	stri_lman
ATP1A2	ra	nido	0.605556	0.0299889	-0.413197	-0.398916	-0.305335	0.370631	0.528247	0.561585	0.601163	ra_nido
ATP1A2	arco	nido	0.676484	0.0153154	-0.552615	-0.456271	-0.418643	0.350381	0.432641	0.468695	0.617535	arco_nido
ATP1A2	lman	nido	0.779403	0.0345123	-0.444402	-0.34762	-0.333039	0.390085	0.450854	0.460087	0.480015	lman_nido
ATP1A2	x	nido	0.809732	0.0295812	-0.540945	-0.454464	-0.378	0.304317	0.345576	0.390811	0.472483	x_nido
ATP1A2	stri	nido	0.708526	0.0220735	-0.48068	-0.443821	-0.352485	0.298616	0.345861	0.349441	0.380143	stri_nido
ATP1A2	ra	x	0.752344	-0.0138182	-0.529958	-0.526915	-0.473785	0.302539	0.391664	0.425838	0.498881	ra_x
ATP1A2	arco	x	0.740324	0.0680923	-0.59211	-0.535153	-0.448611	0.38662	0.443071	0.515996	0.521933	arco_x
ATP1A2	ncl	x	0.584646	0.0335086	-0.478995	-0.411003	-0.348724	0.327188	0.376736	0.509003	0.526484	ncl_x
ATP1A2	lman	x	0.799352	-0.00926923	-0.556891	-0.489877	-0.41557	0.292197	0.323877	0.356619	0.528082	lman_x
ATP1A2	nido	x	0.809732	0.0295812	-0.540945	-0.454464	-0.378	0.304317	0.345576	0.390811	0.472483	nido_x
ATP1A2	stri	x	0.859851	-0.0199052	-0.523939	-0.468822	-0.394535	0.276498	0.329619	0.398485	0.447983	stri_x
ATP1A2	ra	stri	0.658631	0.000643601	-0.581433	-0.480988	-0.382445	0.314847	0.397357	0.459807	0.470936	ra_stri
ATP1A2	arco	stri	0.688021	-0.0300439	-0.574272	-0.458855	-0.370188	0.253535	0.302432	0.342683	0.387296	arco_stri
ATP1A2	ncl	stri	0.552513	0.0173953	-0.56834	-0.527987	-0.388221	0.33011	0.392312	0.417627	0.514808	ncl_stri
ATP1A2	lman	stri	0.860957	-0.0241238	-0.485527	-0.437881	-0.41679	0.277333	0.327028	0.353338	0.365507	lman_stri
ATP1A2	nido	stri	0.708526	0.0220735	-0.48068	-0.443821	-0.352485	0.298616	0.345861	0.349441	0.380143	nido_stri
ATP1A2	x	stri	0.859851	-0.0199052	-0.523939	-0.468822	-0.394535	0.276498	0.329619	0.398485	0.447983	x_stri
ATP2A3	ncl	hvc	0.583213	-0.0168027	-0.408658	-0.390965	-0.37189	0.316785	0.348544	0.423237	0.56578	ncl_hvc
ATP2A3	hvc	ncl	0.583213	-0.0168027	-0.408658	-0.390965	-0.37189	0.316785	0.348544	0.423237	0.56578	hvc_ncl
ATP6V1C2	lman	ra	0.481291	-0.0182567	-0.466426	-0.418145	-0.365962	0.262102	0.34596	0.439752	0.466513	lman_ra
ATP6V1C2	lman	arco	0.763322	-0.0368722	-0.57281	-0.4897	-0.42968	0.293447	0.306711	0.421172	0.510175	lman_arco
ATP6V1C2	stri	hvc	0.461447	-0.000910746	-0.515114	-0.502633	-0.342364	0.301048	0.412155	0.435461	0.461107	stri_hvc
ATP6V1C2	ra	lman	0.481291	-0.0182567	-0.466426	-0.418145	-0.365962	0.262102	0.34596	0.439752	0.466513	ra_lman
ATP6V1C2	arco	lman	0.763322	-0.0368722	-0.57281	-0.4897	-0.42968	0.293447	0.306711	0.421172	0.510175	arco_lman
ATP6V1C2	nido	lman	0.738229	0.0290271	-0.477774	-0.420581	-0.362341	0.356696	0.42833	0.512314	0.556866	nido_lman
ATP6V1C2	x	lman	0.578129	0.00404979	-0.48066	-0.444865	-0.354332	0.32817	0.379712	0.432996	0.47383	x_lman
ATP6V1C2	stri	lman	0.724714	0.0268829	-0.412874	-0.398768	-0.341815	0.366935	0.442168	0.493445	0.526028	stri_lman
ATP6V1C2	lman	nido	0.738229	0.0290271	-0.477774	-0.420581	-0.362341	0.356696	0.42833	0.512314	0.556866	lman_nido
ATP6V1C2	x	nido	0.446339	0.00623652	-0.595314	-0.47968	-0.428054	0.317541	0.375116	0.389963	0.398487	x_nido
ATP6V1C2	stri	nido	0.665688	0.0220078	-0.468781	-0.411449	-0.358249	0.340615	0.442751	0.520877	0.581399	stri_nido
ATP6V1C2	lman	x	0.578129	0.00404979	-0.48066	-0.444865	-0.354332	0.32817	0.379712	0.432996	0.47383	lman_x
ATP6V1C2	nido	x	0.446339	0.00623652	-0.595314	-0.47968	-0.428054	0.317541	0.375116	0.389963	0.398487	nido_x
ATP6V1C2	stri	x	0.706775	0.00161763	-0.455675	-0.443896	-0.39356	0.280076	0.335957	0.39649	0.514289	stri_x
ATP6V1C2	hvc	stri	0.461447	-0.000910746	-0.515114	-0.502633	-0.342364	0.301048	0.412155	0.435461	0.461107	hvc_stri
ATP6V1C2	lman	stri	0.724714	0.0268829	-0.412874	-0.398768	-0.341815	0.366935	0.442168	0.493445	0.526028	lman_stri
ATP6V1C2	nido	stri	0.665688	0.0220078	-0.468781	-0.411449	-0.358249	0.340615	0.442751	0.520877	0.581399	nido_stri
ATP6V1C2	x	stri	0.706775	0.00161763	-0.455675	-0.443896	-0.39356	0.280076	0.335957	0.39649	0.514289	x_stri
ATP7A	lman	ncl	-0.499419	0.00466094	-0.476018	-0.418764	-0.324362	0.296763	0.389181	0.446689	0.522213	lman_ncl
ATP7A	ncl	lman	-0.499419	0.00466094	-0.476018	-0.418764	-0.324362	0.296763	0.389181	0.446689	0.522213	ncl_lman
B3GALT5	x	ra	0.748177	0.011371	-0.49454	-0.468009	-0.404833	0.333213	0.390746	0.442239	0.528061	x_ra
B3GALT5	stri	ra	0.688557	0.0439992	-0.549898	-0.497852	-0.377025	0.326831	0.392445	0.482379	0.551419	stri_ra
B3GALT5	lman	arco	0.640325	0.00358007	-0.508204	-0.40757	-0.375698	0.310706	0.387977	0.518714	0.582733	lman_arco
B3GALT5	nido	arco	0.635068	0.00417258	-0.523987	-0.401962	-0.318346	0.296583	0.409507	0.512971	0.539058	nido_arco
B3GALT5	arco	lman	0.640325	0.00358007	-0.508204	-0.40757	-0.375698	0.310706	0.387977	0.518714	0.582733	arco_lman
B3GALT5	arco	nido	0.635068	0.00417258	-0.523987	-0.401962	-0.318346	0.296583	0.409507	0.512971	0.539058	arco_nido
B3GALT5	ra	x	0.748177	0.011371	-0.49454	-0.468009	-0.404833	0.333213	0.390746	0.442239	0.528061	ra_x
B3GALT5	stri	x	0.767837	0.00381109	-0.565918	-0.508263	-0.408663	0.321826	0.377379	0.452121	0.524002	stri_x
B3GALT5	ra	stri	0.688557	0.0439992	-0.549898	-0.497852	-0.377025	0.326831	0.392445	0.482379	0.551419	ra_stri
B3GALT5	x	stri	0.767837	0.00381109	-0.565918	-0.508263	-0.408663	0.321826	0.377379	0.452121	0.524002	x_stri
B9D1	arco	ra	0.530238	-0.00202779	-0.500662	-0.480129	-0.400896	0.286266	0.337703	0.430713	0.463872	arco_ra
B9D1	lman	ra	0.520848	0.0216475	-0.486453	-0.44024	-0.373391	0.334006	0.401765	0.429863	0.442837	lman_ra
B9D1	ra	arco	0.530238	-0.00202779	-0.500662	-0.480129	-0.400896	0.286266	0.337703	0.430713	0.463872	ra_arco
B9D1	stri	hvc	0.660765	0.0203071	-0.48278	-0.343644	-0.315678	0.280591	0.33681	0.406279	0.443673	stri_hvc
B9D1	ra	lman	0.520848	0.0216475	-0.486453	-0.44024	-0.373391	0.334006	0.401765	0.429863	0.442837	ra_lman
B9D1	x	lman	0.503053	0.0187683	-0.484092	-0.476194	-0.447281	0.318499	0.344448	0.377011	0.437665	x_lman
B9D1	stri	lman	0.503005	0.0381112	-0.409308	-0.342167	-0.275935	0.298464	0.375498	0.409497	0.496067	stri_lman
B9D1	lman	x	0.503053	0.0187683	-0.484092	-0.476194	-0.447281	0.318499	0.344448	0.377011	0.437665	lman_x
B9D1	hvc	stri	0.660765	0.0203071	-0.48278	-0.343644	-0.315678	0.280591	0.33681	0.406279	0.443673	hvc_stri
B9D1	lman	stri	0.503005	0.0381112	-0.409308	-0.342167	-0.275935	0.298464	0.375498	0.409497	0.496067	lman_stri
BAHD1	lman	ncl	-0.42695	0.0325714	-0.416742	-0.404227	-0.3517	0.38829	0.458417	0.474254	0.493212	lman_ncl
BAHD1	ncl	lman	-0.42695	0.0325714	-0.416742	-0.404227	-0.3517	0.38829	0.458417	0.474254	0.493212	ncl_lman
BANF1	lman	ra	0.573441	-0.0120824	-0.531351	-0.478083	-0.396716	0.313769	0.357275	0.47439	0.499276	lman_ra
BANF1	nido	arco	0.582928	0.0251789	-0.440041	-0.430564	-0.36883	0.303584	0.479835	0.521983	0.558695	nido_arco
BANF1	stri	arco	0.784819	-0.0141681	-0.500892	-0.494843	-0.409879	0.274641	0.422298	0.462647	0.588945	stri_arco
BANF1	x	ncl	0.563904	-0.0092063	-0.565145	-0.540429	-0.435296	0.314434	0.363142	0.438618	0.549519	x_ncl
BANF1	ra	lman	0.573441	-0.0120824	-0.531351	-0.478083	-0.396716	0.313769	0.357275	0.47439	0.499276	ra_lman
BANF1	arco	nido	0.582928	0.0251789	-0.440041	-0.430564	-0.36883	0.303584	0.479835	0.521983	0.558695	arco_nido
BANF1	stri	nido	0.716171	-0.0369053	-0.49621	-0.468504	-0.409037	0.263303	0.338916	0.387622	0.488749	stri_nido
BANF1	ncl	x	0.563904	-0.0092063	-0.565145	-0.540429	-0.435296	0.314434	0.363142	0.438618	0.549519	ncl_x
BANF1	arco	stri	0.784819	-0.0141681	-0.500892	-0.494843	-0.409879	0.274641	0.422298	0.462647	0.588945	arco_stri
BANF1	nido	stri	0.716171	-0.0369053	-0.49621	-0.468504	-0.409037	0.263303	0.338916	0.387622	0.488749	nido_stri
BAX	arco	ra	0.681503	-0.00216848	-0.37482	-0.365715	-0.355648	0.275204	0.385493	0.425567	0.537384	arco_ra
BAX	ncl	ra	0.690608	0.025166	-0.344087	-0.334447	-0.294533	0.358093	0.479431	0.509022	0.53215	ncl_ra
BAX	nido	ra	0.772899	0.0134594	-0.418705	-0.3953	-0.346257	0.310901	0.420392	0.497566	0.577059	nido_ra
BAX	x	ra	0.697552	0.0174829	-0.476382	-0.440804	-0.412234	0.363669	0.383041	0.41905	0.453214	x_ra
BAX	stri	ra	0.70946	-0.005444	-0.491513	-0.41167	-0.378745	0.24515	0.331274	0.447848	0.608748	stri_ra
BAX	ra	arco	0.681503	-0.00216848	-0.37482	-0.365715	-0.355648	0.275204	0.385493	0.425567	0.537384	ra_arco
BAX	ncl	arco	0.698441	-0.0373468	-0.453569	-0.427625	-0.338307	0.240372	0.336601	0.458326	0.617537	ncl_arco
BAX	lman	arco	0.710405	-0.0166357	-0.535215	-0.481514	-0.402471	0.297374	0.400693	0.464041	0.533981	lman_arco
BAX	nido	arco	0.744229	-0.022865	-0.424791	-0.41372	-0.390541	0.287275	0.401776	0.470837	0.504783	nido_arco
BAX	x	arco	0.905136	-0.0379595	-0.511016	-0.493322	-0.435031	0.245767	0.347044	0.446268	0.481991	x_arco
BAX	stri	arco	0.795749	-0.0273847	-0.513093	-0.494062	-0.386542	0.25817	0.336718	0.479297	0.613458	stri_arco
BAX	lman	hvc	0.481853	-0.0352982	-0.537929	-0.438789	-0.393945	0.22145	0.280473	0.362367	0.456676	lman_hvc
BAX	x	hvc	0.632405	-0.00106449	-0.454977	-0.395033	-0.315819	0.319243	0.401696	0.442938	0.466936	x_hvc
BAX	ra	ncl	0.690608	0.025166	-0.344087	-0.334447	-0.294533	0.358093	0.479431	0.509022	0.53215	ra_ncl
BAX	arco	ncl	0.698441	-0.0373468	-0.453569	-0.427625	-0.338307	0.240372	0.336601	0.458326	0.617537	arco_ncl
BAX	lman	ncl	0.675401	-0.0260913	-0.600995	-0.530147	-0.407092	0.316114	0.368881	0.486684	0.503303	lman_ncl
BAX	nido	ncl	0.735544	0.0248675	-0.484663	-0.418671	-0.369057	0.379448	0.449394	0.478701	0.591418	nido_ncl
BAX	x	ncl	0.71936	0.00261492	-0.432625	-0.407106	-0.376781	0.324631	0.368811	0.398101	0.43627	x_ncl
BAX	stri	ncl	0.736492	-0.0289495	-0.54103	-0.523802	-0.479627	0.298185	0.450999	0.485967	0.535958	stri_ncl
BAX	arco	lman	0.710405	-0.0166357	-0.535215	-0.481514	-0.402471	0.297374	0.400693	0.464041	0.533981	arco_lman
BAX	hvc	lman	0.481853	-0.0352982	-0.537929	-0.438789	-0.393945	0.22145	0.280473	0.362367	0.456676	hvc_lman
BAX	ncl	lman	0.675401	-0.0260913	-0.600995	-0.530147	-0.407092	0.316114	0.368881	0.486684	0.503303	ncl_lman
BAX	nido	lman	0.68694	-0.0128554	-0.589224	-0.557643	-0.388501	0.282036	0.421817	0.507706	0.542712	nido_lman
BAX	x	lman	0.735988	-0.00204418	-0.514733	-0.452201	-0.407621	0.331752	0.431449	0.467272	0.553099	x_lman
BAX	stri	lman	0.558392	-0.00866495	-0.524573	-0.432476	-0.395848	0.287044	0.350201	0.402803	0.444239	stri_lman
BAX	ra	nido	0.772899	0.0134594	-0.418705	-0.3953	-0.346257	0.310901	0.420392	0.497566	0.577059	ra_nido
BAX	arco	nido	0.744229	-0.022865	-0.424791	-0.41372	-0.390541	0.287275	0.401776	0.470837	0.504783	arco_nido
BAX	ncl	nido	0.735544	0.0248675	-0.484663	-0.418671	-0.369057	0.379448	0.449394	0.478701	0.591418	ncl_nido
BAX	lman	nido	0.68694	-0.0128554	-0.589224	-0.557643	-0.388501	0.282036	0.421817	0.507706	0.542712	lman_nido
BAX	x	nido	0.712938	-0.00523608	-0.436549	-0.38225	-0.352257	0.275772	0.363014	0.540864	0.563951	x_nido
BAX	stri	nido	0.835096	0.0341819	-0.519115	-0.44667	-0.382309	0.342854	0.37946	0.459642	0.471657	stri_nido
BAX	ra	x	0.697552	0.0174829	-0.476382	-0.440804	-0.412234	0.363669	0.383041	0.41905	0.453214	ra_x
BAX	arco	x	0.905136	-0.0379595	-0.511016	-0.493322	-0.435031	0.245767	0.347044	0.446268	0.481991	arco_x
BAX	hvc	x	0.632405	-0.00106449	-0.454977	-0.395033	-0.315819	0.319243	0.401696	0.442938	0.466936	hvc_x
BAX	ncl	x	0.71936	0.00261492	-0.432625	-0.407106	-0.376781	0.324631	0.368811	0.398101	0.43627	ncl_x
BAX	lman	x	0.735988	-0.00204418	-0.514733	-0.452201	-0.407621	0.331752	0.431449	0.467272	0.553099	lman_x
BAX	nido	x	0.712938	-0.00523608	-0.436549	-0.38225	-0.352257	0.275772	0.363014	0.540864	0.563951	nido_x
BAX	stri	x	0.717016	0.00890612	-0.502075	-0.437887	-0.405825	0.289706	0.377061	0.49409	0.592916	stri_x
BAX	ra	stri	0.70946	-0.005444	-0.491513	-0.41167	-0.378745	0.24515	0.331274	0.447848	0.608748	ra_stri
BAX	arco	stri	0.795749	-0.0273847	-0.513093	-0.494062	-0.386542	0.25817	0.336718	0.479297	0.613458	arco_stri
BAX	ncl	stri	0.736492	-0.0289495	-0.54103	-0.523802	-0.479627	0.298185	0.450999	0.485967	0.535958	ncl_stri
BAX	lman	stri	0.558392	-0.00866495	-0.524573	-0.432476	-0.395848	0.287044	0.350201	0.402803	0.444239	lman_stri
BAX	nido	stri	0.835096	0.0341819	-0.519115	-0.44667	-0.382309	0.342854	0.37946	0.459642	0.471657	nido_stri
BAX	x	stri	0.717016	0.00890612	-0.502075	-0.437887	-0.405825	0.289706	0.377061	0.49409	0.592916	x_stri
BAZ1A	lman	ncl	0.572817	-0.0260779	-0.573286	-0.501569	-0.388414	0.259368	0.383139	0.4114	0.447894	lman_ncl
BAZ1A	ncl	lman	0.572817	-0.0260779	-0.573286	-0.501569	-0.388414	0.259368	0.383139	0.4114	0.447894	ncl_lman
BAZ1A	x	lman	0.448786	-0.0359185	-0.496128	-0.472299	-0.421087	0.279881	0.320982	0.368978	0.394885	x_lman
BAZ1A	lman	x	0.448786	-0.0359185	-0.496128	-0.472299	-0.421087	0.279881	0.320982	0.368978	0.394885	lman_x
BBIP1	x	nido	0.597901	-0.0480457	-0.539144	-0.519029	-0.437454	0.299212	0.364194	0.445446	0.54414	x_nido
BBIP1	nido	x	0.597901	-0.0480457	-0.539144	-0.519029	-0.437454	0.299212	0.364194	0.445446	0.54414	nido_x
BBS2	x	ra	0.575095	0.0371656	-0.497597	-0.423458	-0.361741	0.300678	0.442421	0.477322	0.541025	x_ra
BBS2	ra	x	0.575095	0.0371656	-0.497597	-0.423458	-0.361741	0.300678	0.442421	0.477322	0.541025	ra_x
BBS2	stri	x	0.734451	-0.0120438	-0.503927	-0.399216	-0.34375	0.311873	0.435718	0.477171	0.508462	stri_x
BBS2	x	stri	0.734451	-0.0120438	-0.503927	-0.399216	-0.34375	0.311873	0.435718	0.477171	0.508462	x_stri
BBS4	arco	ra	0.551553	0.0262821	-0.451785	-0.427303	-0.347245	0.307927	0.441203	0.532064	0.54842	arco_ra
BBS4	ncl	ra	0.565068	0.025022	-0.540956	-0.524962	-0.421595	0.332077	0.410486	0.473145	0.555021	ncl_ra
BBS4	ra	arco	0.551553	0.0262821	-0.451785	-0.427303	-0.347245	0.307927	0.441203	0.532064	0.54842	ra_arco
BBS4	ncl	arco	0.573739	0.0135375	-0.42217	-0.402871	-0.352921	0.332296	0.40739	0.520989	0.56221	ncl_arco
BBS4	ra	ncl	0.565068	0.025022	-0.540956	-0.524962	-0.421595	0.332077	0.410486	0.473145	0.555021	ra_ncl
BBS4	arco	ncl	0.573739	0.0135375	-0.42217	-0.402871	-0.352921	0.332296	0.40739	0.520989	0.56221	arco_ncl
BBS4	lman	ncl	0.62214	-0.00829187	-0.516626	-0.412338	-0.360955	0.342751	0.388771	0.441986	0.482006	lman_ncl
BBS4	nido	ncl	0.776946	-0.0115654	-0.5508	-0.474601	-0.385353	0.245697	0.337393	0.406296	0.520811	nido_ncl
BBS4	stri	ncl	0.529149	-0.00502069	-0.430379	-0.417196	-0.384323	0.289796	0.359084	0.371958	0.435754	stri_ncl
BBS4	ncl	lman	0.62214	-0.00829187	-0.516626	-0.412338	-0.360955	0.342751	0.388771	0.441986	0.482006	ncl_lman
BBS4	nido	lman	0.573534	-0.0246014	-0.558349	-0.518965	-0.472145	0.280181	0.345781	0.386227	0.491944	nido_lman
BBS4	stri	lman	0.555672	-0.0146086	-0.558894	-0.512676	-0.438759	0.344838	0.42047	0.453367	0.502617	stri_lman
BBS4	ncl	nido	0.776946	-0.0115654	-0.5508	-0.474601	-0.385353	0.245697	0.337393	0.406296	0.520811	ncl_nido
BBS4	lman	nido	0.573534	-0.0246014	-0.558349	-0.518965	-0.472145	0.280181	0.345781	0.386227	0.491944	lman_nido
BBS4	stri	nido	0.629036	-0.0052452	-0.407372	-0.380824	-0.355512	0.237786	0.328875	0.441967	0.534312	stri_nido
BBS4	ncl	stri	0.529149	-0.00502069	-0.430379	-0.417196	-0.384323	0.289796	0.359084	0.371958	0.435754	ncl_stri
BBS4	lman	stri	0.555672	-0.0146086	-0.558894	-0.512676	-0.438759	0.344838	0.42047	0.453367	0.502617	lman_stri
BBS4	nido	stri	0.629036	-0.0052452	-0.407372	-0.380824	-0.355512	0.237786	0.328875	0.441967	0.534312	nido_stri
BCL9	x	arco	0.516674	0.00781644	-0.583069	-0.475036	-0.331691	0.306936	0.382939	0.418122	0.439276	x_arco
BCL9	ncl	hvc	0.546867	0.00142909	-0.422431	-0.390234	-0.350897	0.315615	0.426001	0.462353	0.50582	ncl_hvc
BCL9	hvc	ncl	0.546867	0.00142909	-0.422431	-0.390234	-0.350897	0.315615	0.426001	0.462353	0.50582	hvc_ncl
BCL9	stri	lman	0.53988	-0.00792461	-0.563374	-0.514163	-0.451545	0.269942	0.366392	0.388462	0.475832	stri_lman
BCL9	arco	x	0.516674	0.00781644	-0.583069	-0.475036	-0.331691	0.306936	0.382939	0.418122	0.439276	arco_x
BCL9	stri	x	-0.575854	0.0679193	-0.403132	-0.363099	-0.292133	0.376442	0.49888	0.522481	0.547122	stri_x
BCL9	lman	stri	0.53988	-0.00792461	-0.563374	-0.514163	-0.451545	0.269942	0.366392	0.388462	0.475832	lman_stri
BCL9	x	stri	-0.575854	0.0679193	-0.403132	-0.363099	-0.292133	0.376442	0.49888	0.522481	0.547122	x_stri
BCLAF3	lman	ncl	0.513138	-0.000573088	-0.451337	-0.417341	-0.357732	0.325404	0.381881	0.436317	0.473013	lman_ncl
BCLAF3	ncl	lman	0.513138	-0.000573088	-0.451337	-0.417341	-0.357732	0.325404	0.381881	0.436317	0.473013	ncl_lman
BDNF	hvc	ra	0.607735	-0.00644241	-0.471208	-0.404428	-0.324579	0.313944	0.365884	0.434471	0.582669	hvc_ra
BDNF	lman	ra	0.608709	0.0288145	-0.438476	-0.404465	-0.35507	0.36786	0.410509	0.513311	0.580351	lman_ra
BDNF	ra	hvc	0.607735	-0.00644241	-0.471208	-0.404428	-0.324579	0.313944	0.365884	0.434471	0.582669	ra_hvc
BDNF	x	ncl	0.511712	0.0187841	-0.517315	-0.369767	-0.332758	0.30812	0.359021	0.399095	0.419293	x_ncl
BDNF	ra	lman	0.608709	0.0288145	-0.438476	-0.404465	-0.35507	0.36786	0.410509	0.513311	0.580351	ra_lman
BDNF	ncl	x	0.511712	0.0187841	-0.517315	-0.369767	-0.332758	0.30812	0.359021	0.399095	0.419293	ncl_x
BEGAIN	ncl	arco	-0.563071	-0.029754	-0.516076	-0.495587	-0.365457	0.294648	0.345213	0.365539	0.468065	ncl_arco
BEGAIN	arco	ncl	-0.563071	-0.029754	-0.516076	-0.495587	-0.365457	0.294648	0.345213	0.365539	0.468065	arco_ncl
BEGAIN	stri	x	0.54907	-0.0310384	-0.543538	-0.432352	-0.360866	0.279624	0.315501	0.466252	0.496945	stri_x
BEGAIN	x	stri	0.54907	-0.0310384	-0.543538	-0.432352	-0.360866	0.279624	0.315501	0.466252	0.496945	x_stri
BEND3	lman	arco	0.548334	0.00635115	-0.545132	-0.444567	-0.343187	0.291245	0.355066	0.456039	0.474193	lman_arco
BEND3	arco	lman	0.548334	0.00635115	-0.545132	-0.444567	-0.343187	0.291245	0.355066	0.456039	0.474193	arco_lman
BEND3	x	lman	0.543752	0.0225228	-0.473804	-0.410645	-0.359165	0.307901	0.413316	0.450849	0.481923	x_lman
BEND3	stri	lman	0.46978	-0.0327457	-0.453051	-0.411043	-0.366929	0.255692	0.326448	0.418791	0.465427	stri_lman
BEND3	lman	x	0.543752	0.0225228	-0.473804	-0.410645	-0.359165	0.307901	0.413316	0.450849	0.481923	lman_x
BEND3	stri	x	0.500609	0.00686947	-0.44085	-0.437534	-0.336997	0.247665	0.31084	0.375863	0.402071	stri_x
BEND3	lman	stri	0.46978	-0.0327457	-0.453051	-0.411043	-0.366929	0.255692	0.326448	0.418791	0.465427	lman_stri
BEND3	x	stri	0.500609	0.00686947	-0.44085	-0.437534	-0.336997	0.247665	0.31084	0.375863	0.402071	x_stri
BHLHE40	arco	ra	0.823193	-0.0203701	-0.539249	-0.480532	-0.36635	0.270833	0.370821	0.416323	0.457603	arco_ra
BHLHE40	hvc	ra	0.792086	-0.00431174	-0.41997	-0.357731	-0.351218	0.287672	0.401492	0.451313	0.462599	hvc_ra
BHLHE40	ncl	ra	0.842164	-0.0041885	-0.640595	-0.409366	-0.314186	0.268505	0.390563	0.47585	0.510509	ncl_ra
BHLHE40	lman	ra	0.791217	-0.065513	-0.477412	-0.445942	-0.380499	0.241152	0.336551	0.391568	0.429479	lman_ra
BHLHE40	nido	ra	0.624141	0.00824384	-0.43226	-0.399817	-0.357905	0.27829	0.325181	0.409373	0.430275	nido_ra
BHLHE40	stri	ra	0.605435	0.0019086	-0.713752	-0.462613	-0.401265	0.277086	0.340418	0.396407	0.43119	stri_ra
BHLHE40	ra	arco	0.823193	-0.0203701	-0.539249	-0.480532	-0.36635	0.270833	0.370821	0.416323	0.457603	ra_arco
BHLHE40	hvc	arco	0.691333	0.0102245	-0.533322	-0.502315	-0.337972	0.311916	0.357328	0.467911	0.481247	hvc_arco
BHLHE40	ncl	arco	0.816482	0.0457378	-0.474984	-0.404042	-0.322331	0.346629	0.428301	0.477791	0.520056	ncl_arco
BHLHE40	lman	arco	0.713208	0.0273366	-0.395304	-0.368432	-0.337503	0.366239	0.414386	0.456763	0.486413	lman_arco
BHLHE40	nido	arco	0.683287	-0.00134689	-0.476985	-0.449189	-0.37928	0.282982	0.403879	0.482246	0.597819	nido_arco
BHLHE40	stri	arco	0.583911	-0.0236919	-0.512764	-0.482963	-0.398143	0.300393	0.42413	0.484997	0.517746	stri_arco
BHLHE40	ra	hvc	0.792086	-0.00431174	-0.41997	-0.357731	-0.351218	0.287672	0.401492	0.451313	0.462599	ra_hvc
BHLHE40	arco	hvc	0.691333	0.0102245	-0.533322	-0.502315	-0.337972	0.311916	0.357328	0.467911	0.481247	arco_hvc
BHLHE40	ncl	hvc	0.686877	-0.0160365	-0.522635	-0.486609	-0.421994	0.304169	0.452601	0.466463	0.487859	ncl_hvc
BHLHE40	lman	hvc	0.710807	0.00582818	-0.613211	-0.515686	-0.375639	0.254367	0.466831	0.504807	0.591621	lman_hvc
BHLHE40	nido	hvc	0.625509	-0.0130785	-0.473002	-0.463157	-0.439462	0.349608	0.396168	0.437609	0.455994	nido_hvc
BHLHE40	stri	hvc	0.513392	-0.0151441	-0.487726	-0.418352	-0.358175	0.302282	0.403594	0.431188	0.453332	stri_hvc
BHLHE40	ra	ncl	0.842164	-0.0041885	-0.640595	-0.409366	-0.314186	0.268505	0.390563	0.47585	0.510509	ra_ncl
BHLHE40	arco	ncl	0.816482	0.0457378	-0.474984	-0.404042	-0.322331	0.346629	0.428301	0.477791	0.520056	arco_ncl
BHLHE40	hvc	ncl	0.686877	-0.0160365	-0.522635	-0.486609	-0.421994	0.304169	0.452601	0.466463	0.487859	hvc_ncl
BHLHE40	lman	ncl	0.610265	0.011453	-0.41002	-0.376622	-0.31649	0.322825	0.403843	0.427825	0.562288	lman_ncl
BHLHE40	stri	ncl	0.725609	0.0125161	-0.515969	-0.446425	-0.328608	0.362665	0.431935	0.499961	0.523563	stri_ncl
BHLHE40	ra	lman	0.791217	-0.065513	-0.477412	-0.445942	-0.380499	0.241152	0.336551	0.391568	0.429479	ra_lman
BHLHE40	arco	lman	0.713208	0.0273366	-0.395304	-0.368432	-0.337503	0.366239	0.414386	0.456763	0.486413	arco_lman
BHLHE40	hvc	lman	0.710807	0.00582818	-0.613211	-0.515686	-0.375639	0.254367	0.466831	0.504807	0.591621	hvc_lman
BHLHE40	ncl	lman	0.610265	0.011453	-0.41002	-0.376622	-0.31649	0.322825	0.403843	0.427825	0.562288	ncl_lman
BHLHE40	nido	lman	0.729475	0.0064455	-0.478842	-0.448129	-0.417549	0.38268	0.515335	0.542356	0.559506	nido_lman
BHLHE40	ra	nido	0.624141	0.00824384	-0.43226	-0.399817	-0.357905	0.27829	0.325181	0.409373	0.430275	ra_nido
BHLHE40	arco	nido	0.683287	-0.00134689	-0.476985	-0.449189	-0.37928	0.282982	0.403879	0.482246	0.597819	arco_nido
BHLHE40	hvc	nido	0.625509	-0.0130785	-0.473002	-0.463157	-0.439462	0.349608	0.396168	0.437609	0.455994	hvc_nido
BHLHE40	lman	nido	0.729475	0.0064455	-0.478842	-0.448129	-0.417549	0.38268	0.515335	0.542356	0.559506	lman_nido
BHLHE40	stri	x	0.650674	-0.0155609	-0.548728	-0.53087	-0.455853	0.315594	0.339584	0.353501	0.375553	stri_x
BHLHE40	ra	stri	0.605435	0.0019086	-0.713752	-0.462613	-0.401265	0.277086	0.340418	0.396407	0.43119	ra_stri
BHLHE40	arco	stri	0.583911	-0.0236919	-0.512764	-0.482963	-0.398143	0.300393	0.42413	0.484997	0.517746	arco_stri
BHLHE40	hvc	stri	0.513392	-0.0151441	-0.487726	-0.418352	-0.358175	0.302282	0.403594	0.431188	0.453332	hvc_stri
BHLHE40	ncl	stri	0.725609	0.0125161	-0.515969	-0.446425	-0.328608	0.362665	0.431935	0.499961	0.523563	ncl_stri
BHLHE40	x	stri	0.650674	-0.0155609	-0.548728	-0.53087	-0.455853	0.315594	0.339584	0.353501	0.375553	x_stri
BMPER	ncl	ra	0.548004	0.0213878	-0.487389	-0.469097	-0.41656	0.32441	0.406623	0.442347	0.52343	ncl_ra
BMPER	ra	ncl	0.548004	0.0213878	-0.487389	-0.469097	-0.41656	0.32441	0.406623	0.442347	0.52343	ra_ncl
BMPER	nido	ncl	0.560998	-0.0453772	-0.588236	-0.54517	-0.465237	0.249326	0.329609	0.39566	0.458166	nido_ncl
BMPER	ncl	nido	0.560998	-0.0453772	-0.588236	-0.54517	-0.465237	0.249326	0.329609	0.39566	0.458166	ncl_nido
BNIP2	lman	hvc	0.450349	-0.00404616	-0.36874	-0.337134	-0.320281	0.330819	0.370752	0.395009	0.414591	lman_hvc
BNIP2	hvc	lman	0.450349	-0.00404616	-0.36874	-0.337134	-0.320281	0.330819	0.370752	0.395009	0.414591	hvc_lman
BOK	x	ncl	0.558367	0.00908173	-0.425648	-0.384773	-0.365607	0.323728	0.448777	0.479442	0.509285	x_ncl
BOK	x	nido	0.548194	0.011599	-0.497523	-0.374839	-0.328625	0.327605	0.415921	0.497335	0.535332	x_nido
BOK	stri	nido	0.519951	0.00426446	-0.492831	-0.404406	-0.387576	0.260489	0.358123	0.425025	0.449536	stri_nido
BOK	ncl	x	0.558367	0.00908173	-0.425648	-0.384773	-0.365607	0.323728	0.448777	0.479442	0.509285	ncl_x
BOK	nido	x	0.548194	0.011599	-0.497523	-0.374839	-0.328625	0.327605	0.415921	0.497335	0.535332	nido_x
BOK	stri	x	0.769068	0.0365889	-0.412199	-0.40365	-0.355764	0.355865	0.443766	0.49079	0.545471	stri_x
BOK	nido	stri	0.519951	0.00426446	-0.492831	-0.404406	-0.387576	0.260489	0.358123	0.425025	0.449536	nido_stri
BOK	x	stri	0.769068	0.0365889	-0.412199	-0.40365	-0.355764	0.355865	0.443766	0.49079	0.545471	x_stri
BRD8	arco	ra	0.610134	0.0362301	-0.353278	-0.343986	-0.33027	0.328509	0.407053	0.456294	0.50321	arco_ra
BRD8	hvc	ra	0.542382	-0.0150514	-0.522661	-0.505392	-0.3783	0.311048	0.406727	0.440674	0.457373	hvc_ra
BRD8	ra	arco	0.610134	0.0362301	-0.353278	-0.343986	-0.33027	0.328509	0.407053	0.456294	0.50321	ra_arco
BRD8	ncl	arco	0.712349	-0.0292717	-0.447116	-0.428285	-0.390125	0.270704	0.330671	0.422748	0.463345	ncl_arco
BRD8	ra	hvc	0.542382	-0.0150514	-0.522661	-0.505392	-0.3783	0.311048	0.406727	0.440674	0.457373	ra_hvc
BRD8	arco	ncl	0.712349	-0.0292717	-0.447116	-0.428285	-0.390125	0.270704	0.330671	0.422748	0.463345	arco_ncl
BRD8	nido	lman	0.63865	-0.000854444	-0.515313	-0.414271	-0.392275	0.286842	0.401376	0.453802	0.522921	nido_lman
BRD8	lman	nido	0.63865	-0.000854444	-0.515313	-0.414271	-0.392275	0.286842	0.401376	0.453802	0.522921	lman_nido
BRD8	stri	x	0.444266	-0.0604489	-0.484895	-0.44068	-0.415476	0.242469	0.293162	0.373466	0.418135	stri_x
BRD8	x	stri	0.444266	-0.0604489	-0.484895	-0.44068	-0.415476	0.242469	0.293162	0.373466	0.418135	x_stri
BRINP3	stri	x	0.639313	-0.0116924	-0.462581	-0.419702	-0.392684	0.267023	0.40819	0.49624	0.586081	stri_x
BRINP3	x	stri	0.639313	-0.0116924	-0.462581	-0.419702	-0.392684	0.267023	0.40819	0.49624	0.586081	x_stri
BRS3	ncl	arco	0.523786	0.034079	-0.475051	-0.420863	-0.388846	0.347366	0.374786	0.446664	0.481368	ncl_arco
BRS3	arco	ncl	0.523786	0.034079	-0.475051	-0.420863	-0.388846	0.347366	0.374786	0.446664	0.481368	arco_ncl
BRWD1	ncl	ra	0.696247	0.0155697	-0.552389	-0.436406	-0.379362	0.362499	0.408447	0.490012	0.564802	ncl_ra
BRWD1	stri	ra	0.55825	0.0130713	-0.504931	-0.485331	-0.366325	0.317212	0.389758	0.424453	0.518954	stri_ra
BRWD1	ra	ncl	0.696247	0.0155697	-0.552389	-0.436406	-0.379362	0.362499	0.408447	0.490012	0.564802	ra_ncl
BRWD1	x	lman	0.400536	0.00448671	-0.500264	-0.445131	-0.386706	0.320849	0.357743	0.383323	0.398403	x_lman
BRWD1	lman	x	0.400536	0.00448671	-0.500264	-0.445131	-0.386706	0.320849	0.357743	0.383323	0.398403	lman_x
BRWD1	ra	stri	0.55825	0.0130713	-0.504931	-0.485331	-0.366325	0.317212	0.389758	0.424453	0.518954	ra_stri
BSN	hvc	arco	0.444398	0.0114354	-0.43204	-0.370052	-0.317997	0.308103	0.334361	0.383151	0.391555	hvc_arco
BSN	stri	arco	0.562758	0.00235679	-0.505443	-0.468206	-0.399886	0.327688	0.387453	0.442295	0.488588	stri_arco
BSN	arco	hvc	0.444398	0.0114354	-0.43204	-0.370052	-0.317997	0.308103	0.334361	0.383151	0.391555	arco_hvc
BSN	x	lman	0.836901	-0.00957627	-0.492027	-0.483572	-0.406207	0.274879	0.329206	0.382983	0.42469	x_lman
BSN	stri	nido	0.492125	0.00537784	-0.454941	-0.4127	-0.362076	0.272975	0.359291	0.395958	0.41527	stri_nido
BSN	lman	x	0.836901	-0.00957627	-0.492027	-0.483572	-0.406207	0.274879	0.329206	0.382983	0.42469	lman_x
BSN	arco	stri	0.562758	0.00235679	-0.505443	-0.468206	-0.399886	0.327688	0.387453	0.442295	0.488588	arco_stri
BSN	nido	stri	0.492125	0.00537784	-0.454941	-0.4127	-0.362076	0.272975	0.359291	0.395958	0.41527	nido_stri
BTBD17	ncl	ra	0.719371	0.0253315	-0.502697	-0.406733	-0.327468	0.365515	0.466072	0.523758	0.542994	ncl_ra
BTBD17	hvc	arco	0.498331	-0.00749539	-0.504461	-0.423066	-0.309921	0.270539	0.394555	0.409343	0.426855	hvc_arco
BTBD17	arco	hvc	0.498331	-0.00749539	-0.504461	-0.423066	-0.309921	0.270539	0.394555	0.409343	0.426855	arco_hvc
BTBD17	ra	ncl	0.719371	0.0253315	-0.502697	-0.406733	-0.327468	0.365515	0.466072	0.523758	0.542994	ra_ncl
BTBD17	x	lman	0.587115	0.014835	-0.514386	-0.502309	-0.471418	0.374194	0.430958	0.468237	0.524537	x_lman
BTBD17	lman	x	0.587115	0.014835	-0.514386	-0.502309	-0.471418	0.374194	0.430958	0.468237	0.524537	lman_x
BTBD7	hvc	ra	-0.552581	0.0265104	-0.507562	-0.363898	-0.323573	0.307247	0.437403	0.481894	0.516172	hvc_ra
BTBD7	ra	hvc	-0.552581	0.0265104	-0.507562	-0.363898	-0.323573	0.307247	0.437403	0.481894	0.516172	ra_hvc
BTBD7	stri	x	-0.549266	-0.0177132	-0.473731	-0.414393	-0.371918	0.306959	0.390426	0.490189	0.598358	stri_x
BTBD7	x	stri	-0.549266	-0.0177132	-0.473731	-0.414393	-0.371918	0.306959	0.390426	0.490189	0.598358	x_stri
BTRC	hvc	arco	0.540439	0.0205537	-0.603871	-0.459908	-0.418141	0.36255	0.421227	0.467819	0.527385	hvc_arco
BTRC	arco	hvc	0.540439	0.0205537	-0.603871	-0.459908	-0.418141	0.36255	0.421227	0.467819	0.527385	arco_hvc
BTRC	x	lman	0.505961	-0.00350454	-0.513015	-0.495331	-0.435393	0.34542	0.385977	0.445334	0.472152	x_lman
BTRC	lman	x	0.505961	-0.00350454	-0.513015	-0.495331	-0.435393	0.34542	0.385977	0.445334	0.472152	lman_x
BXL5	x	ra	0.493384	-0.00837157	-0.539967	-0.483303	-0.432848	0.32366	0.358918	0.418016	0.463146	x_ra
BXL5	ra	x	0.493384	-0.00837157	-0.539967	-0.483303	-0.432848	0.32366	0.358918	0.418016	0.463146	ra_x
C1GALT1	arco	ra	0.472617	-0.00920111	-0.483857	-0.396987	-0.340324	0.280803	0.339525	0.383085	0.436431	arco_ra
C1GALT1	ra	arco	0.472617	-0.00920111	-0.483857	-0.396987	-0.340324	0.280803	0.339525	0.383085	0.436431	ra_arco
C1GALT1	hvc	arco	0.598946	0.00551906	-0.481509	-0.437597	-0.378664	0.309233	0.358031	0.439782	0.495434	hvc_arco
C1GALT1	ncl	arco	0.604325	0.0352714	-0.610043	-0.462226	-0.385151	0.319679	0.394812	0.454467	0.522429	ncl_arco
C1GALT1	arco	hvc	0.598946	0.00551906	-0.481509	-0.437597	-0.378664	0.309233	0.358031	0.439782	0.495434	arco_hvc
C1GALT1	arco	ncl	0.604325	0.0352714	-0.610043	-0.462226	-0.385151	0.319679	0.394812	0.454467	0.522429	arco_ncl
C1GALT1	stri	ncl	0.502136	0.0171554	-0.500205	-0.431417	-0.393852	0.328598	0.387634	0.449131	0.461035	stri_ncl
C1GALT1	ncl	stri	0.502136	0.0171554	-0.500205	-0.431417	-0.393852	0.328598	0.387634	0.449131	0.461035	ncl_stri
C1QL3	arco	ra	0.672457	0.0274673	-0.385282	-0.337879	-0.32554	0.303681	0.36972	0.438987	0.448045	arco_ra
C1QL3	ra	arco	0.672457	0.0274673	-0.385282	-0.337879	-0.32554	0.303681	0.36972	0.438987	0.448045	ra_arco
C1QL3	ncl	hvc	0.61552	0.0119091	-0.52781	-0.45131	-0.40749	0.31882	0.40227	0.434115	0.460623	ncl_hvc
C1QL3	hvc	ncl	0.61552	0.0119091	-0.52781	-0.45131	-0.40749	0.31882	0.40227	0.434115	0.460623	hvc_ncl
C4	ncl	hvc	0.497157	-0.00564842	-0.455812	-0.413921	-0.381146	0.302776	0.376474	0.44062	0.495096	ncl_hvc
C4	lman	hvc	0.616704	-0.00949179	-0.535904	-0.45608	-0.347425	0.279826	0.337773	0.34891	0.384389	lman_hvc
C4	hvc	ncl	0.497157	-0.00564842	-0.455812	-0.413921	-0.381146	0.302776	0.376474	0.44062	0.495096	hvc_ncl
C4	hvc	lman	0.616704	-0.00949179	-0.535904	-0.45608	-0.347425	0.279826	0.337773	0.34891	0.384389	hvc_lman
C4	x	nido	0.644344	0.00710701	-0.56073	-0.511658	-0.414202	0.274294	0.401085	0.447049	0.479116	x_nido
C4	stri	nido	0.595098	-0.0387448	-0.45213	-0.442204	-0.430234	0.282463	0.344825	0.405035	0.494349	stri_nido
C4	nido	x	0.644344	0.00710701	-0.56073	-0.511658	-0.414202	0.274294	0.401085	0.447049	0.479116	nido_x
C4	nido	stri	0.595098	-0.0387448	-0.45213	-0.442204	-0.430234	0.282463	0.344825	0.405035	0.494349	nido_stri
CA10	hvc	arco	0.519804	0.0184321	-0.403386	-0.377903	-0.347695	0.327528	0.397429	0.437378	0.456265	hvc_arco
CA10	arco	hvc	0.519804	0.0184321	-0.403386	-0.377903	-0.347695	0.327528	0.397429	0.437378	0.456265	arco_hvc
CA10	x	ncl	0.563779	0.0471601	-0.521288	-0.407091	-0.365872	0.41903	0.462307	0.520793	0.535287	x_ncl
CA10	stri	lman	0.602009	0.0149804	-0.516721	-0.410438	-0.346605	0.327256	0.482031	0.517694	0.54533	stri_lman
CA10	x	nido	0.625769	-0.0138228	-0.440197	-0.42825	-0.400001	0.297993	0.357526	0.448109	0.493085	x_nido
CA10	stri	nido	0.455402	-0.0583405	-0.511015	-0.491955	-0.470409	0.25161	0.308291	0.402983	0.43057	stri_nido
CA10	ncl	x	0.563779	0.0471601	-0.521288	-0.407091	-0.365872	0.41903	0.462307	0.520793	0.535287	ncl_x
CA10	nido	x	0.625769	-0.0138228	-0.440197	-0.42825	-0.400001	0.297993	0.357526	0.448109	0.493085	nido_x
CA10	stri	x	0.672849	0.0228577	-0.442206	-0.42419	-0.352906	0.313138	0.402345	0.513144	0.554753	stri_x
CA10	lman	stri	0.602009	0.0149804	-0.516721	-0.410438	-0.346605	0.327256	0.482031	0.517694	0.54533	lman_stri
CA10	nido	stri	0.455402	-0.0583405	-0.511015	-0.491955	-0.470409	0.25161	0.308291	0.402983	0.43057	nido_stri
CA10	x	stri	0.672849	0.0228577	-0.442206	-0.42419	-0.352906	0.313138	0.402345	0.513144	0.554753	x_stri
CA15	hvc	arco	-0.606958	-0.00151168	-0.533013	-0.518436	-0.410604	0.307892	0.442245	0.478868	0.49762	hvc_arco
CA15	x	arco	0.592008	-0.0147651	-0.517665	-0.446764	-0.398533	0.326434	0.393306	0.414393	0.429794	x_arco
CA15	arco	hvc	-0.606958	-0.00151168	-0.533013	-0.518436	-0.410604	0.307892	0.442245	0.478868	0.49762	arco_hvc
CA15	arco	x	0.592008	-0.0147651	-0.517665	-0.446764	-0.398533	0.326434	0.393306	0.414393	0.429794	arco_x
CA15	stri	x	0.606824	0.0244076	-0.486936	-0.401698	-0.352153	0.36017	0.399441	0.447988	0.453065	stri_x
CA15	x	stri	0.606824	0.0244076	-0.486936	-0.401698	-0.352153	0.36017	0.399441	0.447988	0.453065	x_stri
CA2	arco	ra	0.881076	0.0282555	-0.419456	-0.373834	-0.332728	0.313626	0.42118	0.491638	0.560014	arco_ra
CA2	hvc	ra	0.727064	0.00953907	-0.564654	-0.435498	-0.384655	0.396327	0.449501	0.510536	0.561364	hvc_ra
CA2	lman	ra	0.774483	-0.0324742	-0.529439	-0.471602	-0.432599	0.317411	0.35925	0.453887	0.488583	lman_ra
CA2	x	ra	0.855304	-0.0134593	-0.580824	-0.525154	-0.409285	0.257909	0.316682	0.406187	0.472098	x_ra
CA2	stri	ra	0.624108	-0.00372114	-0.447287	-0.365723	-0.343903	0.25414	0.351191	0.391698	0.412413	stri_ra
CA2	ra	arco	0.881076	0.0282555	-0.419456	-0.373834	-0.332728	0.313626	0.42118	0.491638	0.560014	ra_arco
CA2	hvc	arco	0.686554	-0.00774626	-0.467231	-0.461174	-0.388321	0.304976	0.362975	0.531205	0.618046	hvc_arco
CA2	lman	arco	0.788639	-0.022448	-0.527331	-0.446084	-0.343121	0.284143	0.413789	0.456627	0.489267	lman_arco
CA2	x	arco	0.840355	-0.0267696	-0.429981	-0.39682	-0.369748	0.328477	0.372711	0.409624	0.444813	x_arco
CA2	stri	arco	0.595537	0.0118918	-0.443243	-0.42022	-0.345119	0.322561	0.403058	0.426952	0.527511	stri_arco
CA2	ra	hvc	0.727064	0.00953907	-0.564654	-0.435498	-0.384655	0.396327	0.449501	0.510536	0.561364	ra_hvc
CA2	arco	hvc	0.686554	-0.00774626	-0.467231	-0.461174	-0.388321	0.304976	0.362975	0.531205	0.618046	arco_hvc
CA2	lman	hvc	0.535333	0.00160194	-0.438032	-0.393905	-0.342974	0.271023	0.409567	0.435328	0.462153	lman_hvc
CA2	x	hvc	0.543734	0.0200991	-0.448565	-0.411021	-0.364779	0.316302	0.420333	0.454135	0.497692	x_hvc
CA2	ra	lman	0.774483	-0.0324742	-0.529439	-0.471602	-0.432599	0.317411	0.35925	0.453887	0.488583	ra_lman
CA2	arco	lman	0.788639	-0.022448	-0.527331	-0.446084	-0.343121	0.284143	0.413789	0.456627	0.489267	arco_lman
CA2	hvc	lman	0.535333	0.00160194	-0.438032	-0.393905	-0.342974	0.271023	0.409567	0.435328	0.462153	hvc_lman
CA2	nido	lman	0.605606	-0.0386922	-0.517313	-0.479618	-0.443148	0.270135	0.336893	0.427339	0.529686	nido_lman
CA2	x	lman	0.922939	-0.00112371	-0.495861	-0.441256	-0.394043	0.281443	0.336133	0.475086	0.565272	x_lman
CA2	stri	lman	0.660238	-0.0165414	-0.483411	-0.418995	-0.411397	0.263908	0.31278	0.387935	0.414705	stri_lman
CA2	lman	nido	0.605606	-0.0386922	-0.517313	-0.479618	-0.443148	0.270135	0.336893	0.427339	0.529686	lman_nido
CA2	stri	nido	0.523969	-0.0299778	-0.542506	-0.526093	-0.455122	0.246498	0.340185	0.358706	0.424511	stri_nido
CA2	ra	x	0.855304	-0.0134593	-0.580824	-0.525154	-0.409285	0.257909	0.316682	0.406187	0.472098	ra_x
CA2	arco	x	0.840355	-0.0267696	-0.429981	-0.39682	-0.369748	0.328477	0.372711	0.409624	0.444813	arco_x
CA2	hvc	x	0.543734	0.0200991	-0.448565	-0.411021	-0.364779	0.316302	0.420333	0.454135	0.497692	hvc_x
CA2	lman	x	0.922939	-0.00112371	-0.495861	-0.441256	-0.394043	0.281443	0.336133	0.475086	0.565272	lman_x
CA2	stri	x	0.570382	-0.00519835	-0.518912	-0.508121	-0.456754	0.302563	0.370868	0.435699	0.466931	stri_x
CA2	ra	stri	0.624108	-0.00372114	-0.447287	-0.365723	-0.343903	0.25414	0.351191	0.391698	0.412413	ra_stri
CA2	arco	stri	0.595537	0.0118918	-0.443243	-0.42022	-0.345119	0.322561	0.403058	0.426952	0.527511	arco_stri
CA2	lman	stri	0.660238	-0.0165414	-0.483411	-0.418995	-0.411397	0.263908	0.31278	0.387935	0.414705	lman_stri
CA2	nido	stri	0.523969	-0.0299778	-0.542506	-0.526093	-0.455122	0.246498	0.340185	0.358706	0.424511	nido_stri
CA2	x	stri	0.570382	-0.00519835	-0.518912	-0.508121	-0.456754	0.302563	0.370868	0.435699	0.466931	x_stri
CA5A	stri	x	0.577035	2.85729e-05	-0.519185	-0.467065	-0.38195	0.332173	0.371234	0.432887	0.535598	stri_x
CA5A	x	stri	0.577035	2.85729e-05	-0.519185	-0.467065	-0.38195	0.332173	0.371234	0.432887	0.535598	x_stri
CACNA1G	stri	nido	0.595185	0.0106584	-0.517999	-0.43974	-0.387098	0.346062	0.456237	0.477573	0.511696	stri_nido
CACNA1G	nido	stri	0.595185	0.0106584	-0.517999	-0.43974	-0.387098	0.346062	0.456237	0.477573	0.511696	nido_stri
CACNA2D3	stri	x	0.575051	0.0545777	-0.523268	-0.406243	-0.337711	0.346743	0.445584	0.484176	0.51117	stri_x
CACNA2D3	x	stri	0.575051	0.0545777	-0.523268	-0.406243	-0.337711	0.346743	0.445584	0.484176	0.51117	x_stri
CACNG4	hvc	ra	0.503345	-0.00612066	-0.44434	-0.41048	-0.36337	0.241282	0.393077	0.454641	0.471013	hvc_ra
CACNG4	ncl	ra	0.587708	-0.0289898	-0.502378	-0.404789	-0.353184	0.239694	0.344429	0.467376	0.561276	ncl_ra
CACNG4	ra	hvc	0.503345	-0.00612066	-0.44434	-0.41048	-0.36337	0.241282	0.393077	0.454641	0.471013	ra_hvc
CACNG4	nido	hvc	0.550913	0.0117171	-0.452312	-0.429995	-0.388767	0.332073	0.384051	0.408847	0.457197	nido_hvc
CACNG4	ra	ncl	0.587708	-0.0289898	-0.502378	-0.404789	-0.353184	0.239694	0.344429	0.467376	0.561276	ra_ncl
CACNG4	hvc	nido	0.550913	0.0117171	-0.452312	-0.429995	-0.388767	0.332073	0.384051	0.408847	0.457197	hvc_nido
CACNG5	ncl	ra	0.700238	0.00496595	-0.435834	-0.414058	-0.403458	0.318775	0.463851	0.526457	0.566454	ncl_ra
CACNG5	nido	hvc	0.522911	0.00238822	-0.579288	-0.46342	-0.429134	0.332931	0.398498	0.45439	0.498948	nido_hvc
CACNG5	stri	hvc	0.520977	-0.0696362	-0.48591	-0.457377	-0.433784	0.234461	0.391854	0.440016	0.475658	stri_hvc
CACNG5	ra	ncl	0.700238	0.00496595	-0.435834	-0.414058	-0.403458	0.318775	0.463851	0.526457	0.566454	ra_ncl
CACNG5	x	ncl	0.493988	0.0188417	-0.40602	-0.398099	-0.37214	0.347839	0.385131	0.432916	0.435379	x_ncl
CACNG5	hvc	nido	0.522911	0.00238822	-0.579288	-0.46342	-0.429134	0.332931	0.398498	0.45439	0.498948	hvc_nido
CACNG5	ncl	x	0.493988	0.0188417	-0.40602	-0.398099	-0.37214	0.347839	0.385131	0.432916	0.435379	ncl_x
CACNG5	hvc	stri	0.520977	-0.0696362	-0.48591	-0.457377	-0.433784	0.234461	0.391854	0.440016	0.475658	hvc_stri
CADPS2	x	arco	0.510633	0.000873718	-0.508135	-0.498327	-0.458171	0.284301	0.403287	0.435029	0.500111	x_arco
CADPS2	arco	x	0.510633	0.000873718	-0.508135	-0.498327	-0.458171	0.284301	0.403287	0.435029	0.500111	arco_x
CALCRL	x	nido	0.567581	0.0101423	-0.393753	-0.367456	-0.352395	0.278685	0.325557	0.345915	0.478254	x_nido
CALCRL	nido	x	0.567581	0.0101423	-0.393753	-0.367456	-0.352395	0.278685	0.325557	0.345915	0.478254	nido_x
CALR	arco	ra	0.73166	-0.0474908	-0.55052	-0.531253	-0.473104	0.238564	0.3013	0.326671	0.341762	arco_ra
CALR	ncl	ra	0.623661	-0.0254173	-0.528783	-0.497542	-0.434664	0.282861	0.359425	0.382338	0.392012	ncl_ra
CALR	lman	ra	0.528269	-0.0237978	-0.481035	-0.451519	-0.363155	0.281376	0.409115	0.443936	0.484514	lman_ra
CALR	nido	ra	0.463696	-0.0420107	-0.433105	-0.430144	-0.419342	0.250468	0.358427	0.415604	0.434763	nido_ra
CALR	x	ra	0.602458	0.000394436	-0.471684	-0.40973	-0.38604	0.294336	0.434548	0.490892	0.534468	x_ra
CALR	ra	arco	0.73166	-0.0474908	-0.55052	-0.531253	-0.473104	0.238564	0.3013	0.326671	0.341762	ra_arco
CALR	nido	arco	0.554182	-0.0270973	-0.594941	-0.493115	-0.368511	0.31112	0.381738	0.4732	0.481687	nido_arco
CALR	x	arco	0.59833	-0.0188637	-0.392819	-0.377086	-0.355032	0.267187	0.293883	0.340198	0.351118	x_arco
CALR	ra	ncl	0.623661	-0.0254173	-0.528783	-0.497542	-0.434664	0.282861	0.359425	0.382338	0.392012	ra_ncl
CALR	lman	ncl	0.744967	-0.0146546	-0.53599	-0.478536	-0.434628	0.349296	0.419919	0.482304	0.492249	lman_ncl
CALR	nido	ncl	0.684724	-0.0235672	-0.465402	-0.443946	-0.406406	0.298472	0.367893	0.425168	0.442906	nido_ncl
CALR	x	ncl	0.524307	0.0141292	-0.460669	-0.43331	-0.422158	0.334212	0.395794	0.46726	0.51176	x_ncl
CALR	ra	lman	0.528269	-0.0237978	-0.481035	-0.451519	-0.363155	0.281376	0.409115	0.443936	0.484514	ra_lman
CALR	ncl	lman	0.744967	-0.0146546	-0.53599	-0.478536	-0.434628	0.349296	0.419919	0.482304	0.492249	ncl_lman
CALR	nido	lman	0.684812	0.0321375	-0.513906	-0.385996	-0.36814	0.326442	0.451786	0.496165	0.630486	nido_lman
CALR	x	lman	0.659899	0.0433925	-0.609836	-0.452709	-0.370135	0.413265	0.465525	0.493606	0.521518	x_lman
CALR	stri	lman	0.533688	-0.00455605	-0.524443	-0.480457	-0.381907	0.292074	0.386227	0.408746	0.49227	stri_lman
CALR	ra	nido	0.463696	-0.0420107	-0.433105	-0.430144	-0.419342	0.250468	0.358427	0.415604	0.434763	ra_nido
CALR	arco	nido	0.554182	-0.0270973	-0.594941	-0.493115	-0.368511	0.31112	0.381738	0.4732	0.481687	arco_nido
CALR	ncl	nido	0.684724	-0.0235672	-0.465402	-0.443946	-0.406406	0.298472	0.367893	0.425168	0.442906	ncl_nido
CALR	lman	nido	0.684812	0.0321375	-0.513906	-0.385996	-0.36814	0.326442	0.451786	0.496165	0.630486	lman_nido
CALR	x	nido	0.692988	-0.000207862	-0.51725	-0.481844	-0.44199	0.345004	0.429247	0.461333	0.493873	x_nido
CALR	stri	nido	0.620738	0.00803376	-0.536132	-0.489677	-0.398262	0.322181	0.428695	0.481841	0.515958	stri_nido
CALR	ra	x	0.602458	0.000394436	-0.471684	-0.40973	-0.38604	0.294336	0.434548	0.490892	0.534468	ra_x
CALR	arco	x	0.59833	-0.0188637	-0.392819	-0.377086	-0.355032	0.267187	0.293883	0.340198	0.351118	arco_x
CALR	ncl	x	0.524307	0.0141292	-0.460669	-0.43331	-0.422158	0.334212	0.395794	0.46726	0.51176	ncl_x
CALR	lman	x	0.659899	0.0433925	-0.609836	-0.452709	-0.370135	0.413265	0.465525	0.493606	0.521518	lman_x
CALR	nido	x	0.692988	-0.000207862	-0.51725	-0.481844	-0.44199	0.345004	0.429247	0.461333	0.493873	nido_x
CALR	stri	x	0.691543	-0.0298622	-0.4843	-0.435171	-0.398934	0.263798	0.316753	0.387257	0.490684	stri_x
CALR	lman	stri	0.533688	-0.00455605	-0.524443	-0.480457	-0.381907	0.292074	0.386227	0.408746	0.49227	lman_stri
CALR	nido	stri	0.620738	0.00803376	-0.536132	-0.489677	-0.398262	0.322181	0.428695	0.481841	0.515958	nido_stri
CALR	x	stri	0.691543	-0.0298622	-0.4843	-0.435171	-0.398934	0.263798	0.316753	0.387257	0.490684	x_stri
CAMK1	lman	arco	0.5939	-0.0564067	-0.494585	-0.476906	-0.469358	0.243511	0.333025	0.341102	0.345164	lman_arco
CAMK1	arco	lman	0.5939	-0.0564067	-0.494585	-0.476906	-0.469358	0.243511	0.333025	0.341102	0.345164	arco_lman
CAMK1	stri	nido	0.491211	-0.0360219	-0.475586	-0.463307	-0.423446	0.309256	0.353848	0.444607	0.477452	stri_nido
CAMK1	stri	x	0.535486	0.0192203	-0.394677	-0.353034	-0.310506	0.283908	0.32373	0.437358	0.457489	stri_x
CAMK1	nido	stri	0.491211	-0.0360219	-0.475586	-0.463307	-0.423446	0.309256	0.353848	0.444607	0.477452	nido_stri
CAMK1	x	stri	0.535486	0.0192203	-0.394677	-0.353034	-0.310506	0.283908	0.32373	0.437358	0.457489	x_stri
CAMK1G	lman	ncl	0.581086	0.0050874	-0.48226	-0.43898	-0.386618	0.284473	0.343939	0.423339	0.503295	lman_ncl
CAMK1G	ncl	lman	0.581086	0.0050874	-0.48226	-0.43898	-0.386618	0.284473	0.343939	0.423339	0.503295	ncl_lman
CAMK2G	arco	ra	0.746801	-0.0148243	-0.425102	-0.39618	-0.358251	0.295944	0.42354	0.459951	0.47036	arco_ra
CAMK2G	hvc	ra	0.532263	0.0373864	-0.456432	-0.442477	-0.354008	0.320921	0.384258	0.439864	0.499141	hvc_ra
CAMK2G	ncl	ra	0.681376	-0.0106623	-0.398383	-0.388444	-0.372078	0.318385	0.4322	0.47494	0.526033	ncl_ra
CAMK2G	lman	ra	0.557783	-0.0124899	-0.457158	-0.443927	-0.383654	0.29978	0.361862	0.38592	0.43136	lman_ra
CAMK2G	nido	ra	0.657633	0.0176412	-0.488529	-0.479634	-0.381664	0.317207	0.381135	0.413954	0.448923	nido_ra
CAMK2G	x	ra	0.513724	-0.0221169	-0.404217	-0.382568	-0.320832	0.312064	0.396043	0.452806	0.47249	x_ra
CAMK2G	stri	ra	0.762475	-0.0152953	-0.493346	-0.457322	-0.380639	0.277957	0.345932	0.3635	0.392535	stri_ra
CAMK2G	ra	arco	0.746801	-0.0148243	-0.425102	-0.39618	-0.358251	0.295944	0.42354	0.459951	0.47036	ra_arco
CAMK2G	hvc	arco	0.623772	-0.0262256	-0.509226	-0.475406	-0.394512	0.255709	0.312927	0.327981	0.384118	hvc_arco
CAMK2G	ncl	arco	0.727624	0.0285132	-0.430869	-0.425081	-0.387141	0.331645	0.470512	0.565293	0.657953	ncl_arco
CAMK2G	lman	arco	0.599464	-0.0105267	-0.512298	-0.477243	-0.412171	0.329294	0.376896	0.446645	0.466778	lman_arco
CAMK2G	nido	arco	0.504751	0.0137701	-0.49096	-0.389684	-0.353735	0.301957	0.374001	0.429988	0.480797	nido_arco
CAMK2G	stri	arco	0.597541	-0.0154297	-0.465696	-0.396879	-0.382629	0.32537	0.424237	0.474281	0.494543	stri_arco
CAMK2G	ra	hvc	0.532263	0.0373864	-0.456432	-0.442477	-0.354008	0.320921	0.384258	0.439864	0.499141	ra_hvc
CAMK2G	arco	hvc	0.623772	-0.0262256	-0.509226	-0.475406	-0.394512	0.255709	0.312927	0.327981	0.384118	arco_hvc
CAMK2G	ncl	hvc	0.590981	-0.00136516	-0.476156	-0.434734	-0.387383	0.283421	0.417008	0.488183	0.501579	ncl_hvc
CAMK2G	ra	ncl	0.681376	-0.0106623	-0.398383	-0.388444	-0.372078	0.318385	0.4322	0.47494	0.526033	ra_ncl
CAMK2G	arco	ncl	0.727624	0.0285132	-0.430869	-0.425081	-0.387141	0.331645	0.470512	0.565293	0.657953	arco_ncl
CAMK2G	hvc	ncl	0.590981	-0.00136516	-0.476156	-0.434734	-0.387383	0.283421	0.417008	0.488183	0.501579	hvc_ncl
CAMK2G	stri	ncl	0.627127	0.0522579	-0.455755	-0.398598	-0.332796	0.38771	0.477096	0.519186	0.534363	stri_ncl
CAMK2G	ra	lman	0.557783	-0.0124899	-0.457158	-0.443927	-0.383654	0.29978	0.361862	0.38592	0.43136	ra_lman
CAMK2G	arco	lman	0.599464	-0.0105267	-0.512298	-0.477243	-0.412171	0.329294	0.376896	0.446645	0.466778	arco_lman
CAMK2G	stri	lman	0.511799	0.0100393	-0.478247	-0.450401	-0.44246	0.330507	0.352165	0.380682	0.392313	stri_lman
CAMK2G	ra	nido	0.657633	0.0176412	-0.488529	-0.479634	-0.381664	0.317207	0.381135	0.413954	0.448923	ra_nido
CAMK2G	arco	nido	0.504751	0.0137701	-0.49096	-0.389684	-0.353735	0.301957	0.374001	0.429988	0.480797	arco_nido
CAMK2G	stri	nido	0.595803	-0.0467302	-0.559806	-0.500771	-0.445857	0.275731	0.363772	0.47951	0.533429	stri_nido
CAMK2G	ra	x	0.513724	-0.0221169	-0.404217	-0.382568	-0.320832	0.312064	0.396043	0.452806	0.47249	ra_x
CAMK2G	ra	stri	0.762475	-0.0152953	-0.493346	-0.457322	-0.380639	0.277957	0.345932	0.3635	0.392535	ra_stri
CAMK2G	arco	stri	0.597541	-0.0154297	-0.465696	-0.396879	-0.382629	0.32537	0.424237	0.474281	0.494543	arco_stri
CAMK2G	ncl	stri	0.627127	0.0522579	-0.455755	-0.398598	-0.332796	0.38771	0.477096	0.519186	0.534363	ncl_stri
CAMK2G	lman	stri	0.511799	0.0100393	-0.478247	-0.450401	-0.44246	0.330507	0.352165	0.380682	0.392313	lman_stri
CAMK2G	nido	stri	0.595803	-0.0467302	-0.559806	-0.500771	-0.445857	0.275731	0.363772	0.47951	0.533429	nido_stri
CANT1	lman	ra	0.665022	-0.00837571	-0.490685	-0.433015	-0.404072	0.302834	0.366459	0.42204	0.494844	lman_ra
CANT1	nido	ncl	0.486433	0.0125274	-0.392453	-0.357252	-0.322505	0.302538	0.377793	0.441652	0.453914	nido_ncl
CANT1	ra	lman	0.665022	-0.00837571	-0.490685	-0.433015	-0.404072	0.302834	0.366459	0.42204	0.494844	ra_lman
CANT1	ncl	nido	0.486433	0.0125274	-0.392453	-0.357252	-0.322505	0.302538	0.377793	0.441652	0.453914	ncl_nido
CANT1	x	nido	0.64315	-0.00952428	-0.523455	-0.48727	-0.410743	0.287587	0.3399	0.414771	0.519796	x_nido
CANT1	nido	x	0.64315	-0.00952428	-0.523455	-0.48727	-0.410743	0.287587	0.3399	0.414771	0.519796	nido_x
CAPN10	hvc	ra	0.56465	-0.0123541	-0.674346	-0.527325	-0.446546	0.301619	0.373831	0.415326	0.432144	hvc_ra
CAPN10	ra	hvc	0.56465	-0.0123541	-0.674346	-0.527325	-0.446546	0.301619	0.373831	0.415326	0.432144	ra_hvc
CAPN10	stri	hvc	0.568923	-0.0156052	-0.528254	-0.455202	-0.362205	0.306727	0.366994	0.406958	0.500156	stri_hvc
CAPN10	hvc	stri	0.568923	-0.0156052	-0.528254	-0.455202	-0.362205	0.306727	0.366994	0.406958	0.500156	hvc_stri
CARHSP1	ncl	arco	0.614865	0.0080494	-0.526238	-0.462595	-0.413321	0.309814	0.441512	0.480074	0.555085	ncl_arco
CARHSP1	stri	hvc	-0.639293	-0.00714547	-0.423829	-0.413974	-0.315797	0.291404	0.387229	0.498125	0.550791	stri_hvc
CARHSP1	arco	ncl	0.614865	0.0080494	-0.526238	-0.462595	-0.413321	0.309814	0.441512	0.480074	0.555085	arco_ncl
CARHSP1	stri	nido	0.549158	0.00913511	-0.547639	-0.48742	-0.372748	0.346339	0.445552	0.467863	0.475269	stri_nido
CARHSP1	hvc	stri	-0.639293	-0.00714547	-0.423829	-0.413974	-0.315797	0.291404	0.387229	0.498125	0.550791	hvc_stri
CARHSP1	nido	stri	0.549158	0.00913511	-0.547639	-0.48742	-0.372748	0.346339	0.445552	0.467863	0.475269	nido_stri
CARM1	nido	ncl	-0.67494	-0.00677572	-0.419545	-0.404267	-0.369694	0.354587	0.419728	0.523732	0.562468	nido_ncl
CARM1	ncl	nido	-0.67494	-0.00677572	-0.419545	-0.404267	-0.369694	0.354587	0.419728	0.523732	0.562468	ncl_nido
CASD1	arco	ra	0.594333	-0.0293725	-0.582946	-0.522976	-0.464908	0.277014	0.359025	0.45753	0.543493	arco_ra
CASD1	x	ra	0.513775	-0.0101954	-0.575032	-0.55513	-0.433223	0.324027	0.399284	0.429696	0.500187	x_ra
CASD1	ra	arco	0.594333	-0.0293725	-0.582946	-0.522976	-0.464908	0.277014	0.359025	0.45753	0.543493	ra_arco
CASD1	stri	hvc	-0.566881	0.0207675	-0.506751	-0.406714	-0.304293	0.245348	0.34031	0.445264	0.507027	stri_hvc
CASD1	ra	x	0.513775	-0.0101954	-0.575032	-0.55513	-0.433223	0.324027	0.399284	0.429696	0.500187	ra_x
CASD1	hvc	stri	-0.566881	0.0207675	-0.506751	-0.406714	-0.304293	0.245348	0.34031	0.445264	0.507027	hvc_stri
CAST	stri	hvc	0.673095	0.0252678	-0.614553	-0.433236	-0.359692	0.310392	0.409345	0.468325	0.476758	stri_hvc
CAST	x	ncl	-0.475656	0.0143829	-0.42536	-0.390294	-0.382034	0.292584	0.396182	0.459193	0.469314	x_ncl
CAST	ncl	x	-0.475656	0.0143829	-0.42536	-0.390294	-0.382034	0.292584	0.396182	0.459193	0.469314	ncl_x
CAST	hvc	stri	0.673095	0.0252678	-0.614553	-0.433236	-0.359692	0.310392	0.409345	0.468325	0.476758	hvc_stri
CBFA2T3	arco	ra	0.765576	-0.0208562	-0.503033	-0.438886	-0.403191	0.255618	0.301438	0.429874	0.484375	arco_ra
CBFA2T3	hvc	ra	0.618862	0.0174612	-0.477894	-0.364539	-0.300069	0.319778	0.386585	0.432844	0.547851	hvc_ra
CBFA2T3	ncl	ra	0.806453	-0.0190353	-0.457197	-0.385042	-0.338104	0.32047	0.47922	0.567678	0.59374	ncl_ra
CBFA2T3	ra	arco	0.765576	-0.0208562	-0.503033	-0.438886	-0.403191	0.255618	0.301438	0.429874	0.484375	ra_arco
CBFA2T3	hvc	arco	0.70903	-0.0173476	-0.58719	-0.528093	-0.480623	0.294887	0.371157	0.417441	0.533718	hvc_arco
CBFA2T3	ncl	arco	0.710264	0.000960573	-0.612533	-0.504874	-0.329132	0.355917	0.400737	0.469754	0.49882	ncl_arco
CBFA2T3	ra	hvc	0.618862	0.0174612	-0.477894	-0.364539	-0.300069	0.319778	0.386585	0.432844	0.547851	ra_hvc
CBFA2T3	arco	hvc	0.70903	-0.0173476	-0.58719	-0.528093	-0.480623	0.294887	0.371157	0.417441	0.533718	arco_hvc
CBFA2T3	ncl	hvc	0.796997	0.00926121	-0.590433	-0.528889	-0.464387	0.359971	0.471469	0.607987	0.621326	ncl_hvc
CBFA2T3	ra	ncl	0.806453	-0.0190353	-0.457197	-0.385042	-0.338104	0.32047	0.47922	0.567678	0.59374	ra_ncl
CBFA2T3	arco	ncl	0.710264	0.000960573	-0.612533	-0.504874	-0.329132	0.355917	0.400737	0.469754	0.49882	arco_ncl
CBFA2T3	hvc	ncl	0.796997	0.00926121	-0.590433	-0.528889	-0.464387	0.359971	0.471469	0.607987	0.621326	hvc_ncl
CBFA2T3	nido	lman	0.682889	-0.0469886	-0.505799	-0.464788	-0.442612	0.267839	0.405244	0.435773	0.50292	nido_lman
CBFA2T3	lman	nido	0.682889	-0.0469886	-0.505799	-0.464788	-0.442612	0.267839	0.405244	0.435773	0.50292	lman_nido
CBFA2T3	stri	nido	0.576306	-0.028811	-0.547597	-0.523641	-0.467684	0.253886	0.3863	0.444147	0.484561	stri_nido
CBFA2T3	stri	x	0.584568	0.00368	-0.483391	-0.418797	-0.360006	0.304872	0.395308	0.464785	0.521849	stri_x
CBFA2T3	nido	stri	0.576306	-0.028811	-0.547597	-0.523641	-0.467684	0.253886	0.3863	0.444147	0.484561	nido_stri
CBFA2T3	x	stri	0.584568	0.00368	-0.483391	-0.418797	-0.360006	0.304872	0.395308	0.464785	0.521849	x_stri
CBL	arco	ra	0.674692	0.0176065	-0.490022	-0.419589	-0.294398	0.274061	0.341758	0.449687	0.527173	arco_ra
CBL	ra	arco	0.674692	0.0176065	-0.490022	-0.419589	-0.294398	0.274061	0.341758	0.449687	0.527173	ra_arco
CCDC34	arco	ra	0.579146	0.0158184	-0.611883	-0.421937	-0.368481	0.34283	0.423724	0.443526	0.46359	arco_ra
CCDC34	hvc	ra	0.447436	-0.0284632	-0.529861	-0.499902	-0.452337	0.251647	0.365187	0.385559	0.417562	hvc_ra
CCDC34	ra	arco	0.579146	0.0158184	-0.611883	-0.421937	-0.368481	0.34283	0.423724	0.443526	0.46359	ra_arco
CCDC34	ra	hvc	0.447436	-0.0284632	-0.529861	-0.499902	-0.452337	0.251647	0.365187	0.385559	0.417562	ra_hvc
CCDC34	ncl	hvc	0.547192	-0.00958738	-0.520221	-0.469354	-0.423322	0.278719	0.393404	0.467625	0.48738	ncl_hvc
CCDC34	stri	hvc	0.480092	-0.0130603	-0.530656	-0.496644	-0.38388	0.269416	0.325248	0.434382	0.465328	stri_hvc
CCDC34	hvc	ncl	0.547192	-0.00958738	-0.520221	-0.469354	-0.423322	0.278719	0.393404	0.467625	0.48738	hvc_ncl
CCDC34	x	nido	0.612746	0.00412634	-0.552338	-0.496263	-0.341874	0.335904	0.404774	0.436202	0.502055	x_nido
CCDC34	nido	x	0.612746	0.00412634	-0.552338	-0.496263	-0.341874	0.335904	0.404774	0.436202	0.502055	nido_x
CCDC34	hvc	stri	0.480092	-0.0130603	-0.530656	-0.496644	-0.38388	0.269416	0.325248	0.434382	0.465328	hvc_stri
CCDC39	arco	ra	0.890636	0.0155371	-0.419953	-0.390146	-0.379114	0.275647	0.370307	0.513556	0.573892	arco_ra
CCDC39	hvc	ra	0.924805	-0.00468713	-0.445623	-0.404104	-0.362553	0.299812	0.335109	0.390894	0.461186	hvc_ra
CCDC39	ncl	ra	0.775932	0.00820213	-0.500423	-0.474839	-0.432588	0.328523	0.425458	0.449225	0.58328	ncl_ra
CCDC39	lman	ra	0.884386	0.0276061	-0.574586	-0.441627	-0.413359	0.337519	0.48979	0.553079	0.63972	lman_ra
CCDC39	nido	ra	0.772621	-0.0400802	-0.528928	-0.501968	-0.387615	0.230924	0.334397	0.398257	0.420628	nido_ra
CCDC39	x	ra	0.908561	0.0440705	-0.4748	-0.399208	-0.342367	0.293649	0.408726	0.535206	0.584688	x_ra
CCDC39	stri	ra	0.859597	-0.00921203	-0.41827	-0.383564	-0.360161	0.376902	0.466886	0.49327	0.533978	stri_ra
CCDC39	ra	arco	0.890636	0.0155371	-0.419953	-0.390146	-0.379114	0.275647	0.370307	0.513556	0.573892	ra_arco
CCDC39	hvc	arco	0.912102	-0.0246108	-0.569368	-0.542674	-0.477608	0.311482	0.404712	0.523761	0.557177	hvc_arco
CCDC39	ncl	arco	0.781601	0.0213718	-0.435899	-0.38542	-0.334521	0.356939	0.43207	0.45273	0.483784	ncl_arco
CCDC39	lman	arco	0.843896	-0.0153867	-0.46316	-0.432568	-0.387986	0.250259	0.351304	0.385341	0.488474	lman_arco
CCDC39	nido	arco	0.73252	0.00546438	-0.5506	-0.510803	-0.448159	0.344436	0.424846	0.527477	0.532807	nido_arco
CCDC39	x	arco	0.817261	-0.0162505	-0.487065	-0.418979	-0.385828	0.31164	0.369505	0.441598	0.458564	x_arco
CCDC39	stri	arco	0.808896	-0.0316866	-0.609	-0.500218	-0.452442	0.267465	0.321401	0.348439	0.490017	stri_arco
CCDC39	ra	hvc	0.924805	-0.00468713	-0.445623	-0.404104	-0.362553	0.299812	0.335109	0.390894	0.461186	ra_hvc
CCDC39	arco	hvc	0.912102	-0.0246108	-0.569368	-0.542674	-0.477608	0.311482	0.404712	0.523761	0.557177	arco_hvc
CCDC39	ncl	hvc	0.83119	-0.0366774	-0.423377	-0.413986	-0.37974	0.277506	0.40829	0.450101	0.535252	ncl_hvc
CCDC39	lman	hvc	0.935377	-0.00134102	-0.517927	-0.460576	-0.423373	0.291933	0.37283	0.428448	0.620593	lman_hvc
CCDC39	nido	hvc	0.816018	0.0275342	-0.564741	-0.501483	-0.418106	0.341195	0.433406	0.51924	0.537351	nido_hvc
CCDC39	x	hvc	0.887804	-0.021379	-0.570899	-0.512302	-0.499432	0.292851	0.37	0.386508	0.512557	x_hvc
CCDC39	stri	hvc	0.827033	0.0173465	-0.521936	-0.480326	-0.416101	0.357711	0.514782	0.593672	0.630796	stri_hvc
CCDC39	ra	ncl	0.775932	0.00820213	-0.500423	-0.474839	-0.432588	0.328523	0.425458	0.449225	0.58328	ra_ncl
CCDC39	arco	ncl	0.781601	0.0213718	-0.435899	-0.38542	-0.334521	0.356939	0.43207	0.45273	0.483784	arco_ncl
CCDC39	hvc	ncl	0.83119	-0.0366774	-0.423377	-0.413986	-0.37974	0.277506	0.40829	0.450101	0.535252	hvc_ncl
CCDC39	lman	ncl	0.766086	0.011942	-0.42302	-0.393622	-0.376622	0.348466	0.420239	0.494297	0.552728	lman_ncl
CCDC39	nido	ncl	0.666495	0.0181153	-0.550537	-0.530257	-0.394089	0.311192	0.392477	0.469579	0.49814	nido_ncl
CCDC39	x	ncl	0.784262	0.00527854	-0.460943	-0.442326	-0.383949	0.381274	0.443181	0.50171	0.531425	x_ncl
CCDC39	stri	ncl	0.822977	0.0625124	-0.418035	-0.379902	-0.326144	0.397515	0.476033	0.487578	0.55088	stri_ncl
CCDC39	ra	lman	0.884386	0.0276061	-0.574586	-0.441627	-0.413359	0.337519	0.48979	0.553079	0.63972	ra_lman
CCDC39	arco	lman	0.843896	-0.0153867	-0.46316	-0.432568	-0.387986	0.250259	0.351304	0.385341	0.488474	arco_lman
CCDC39	hvc	lman	0.935377	-0.00134102	-0.517927	-0.460576	-0.423373	0.291933	0.37283	0.428448	0.620593	hvc_lman
CCDC39	ncl	lman	0.766086	0.011942	-0.42302	-0.393622	-0.376622	0.348466	0.420239	0.494297	0.552728	ncl_lman
CCDC39	nido	lman	0.869446	0.00680641	-0.46151	-0.398147	-0.300571	0.261362	0.30943	0.40409	0.583699	nido_lman
CCDC39	x	lman	0.890424	-0.0111397	-0.508414	-0.476627	-0.415624	0.296356	0.364905	0.456179	0.522184	x_lman
CCDC39	stri	lman	0.819159	0.0378504	-0.504876	-0.421708	-0.318922	0.331952	0.416629	0.539866	0.601603	stri_lman
CCDC39	ra	nido	0.772621	-0.0400802	-0.528928	-0.501968	-0.387615	0.230924	0.334397	0.398257	0.420628	ra_nido
CCDC39	arco	nido	0.73252	0.00546438	-0.5506	-0.510803	-0.448159	0.344436	0.424846	0.527477	0.532807	arco_nido
CCDC39	hvc	nido	0.816018	0.0275342	-0.564741	-0.501483	-0.418106	0.341195	0.433406	0.51924	0.537351	hvc_nido
CCDC39	ncl	nido	0.666495	0.0181153	-0.550537	-0.530257	-0.394089	0.311192	0.392477	0.469579	0.49814	ncl_nido
CCDC39	lman	nido	0.869446	0.00680641	-0.46151	-0.398147	-0.300571	0.261362	0.30943	0.40409	0.583699	lman_nido
CCDC39	x	nido	0.816068	-0.0156103	-0.435243	-0.401797	-0.362865	0.283858	0.3482	0.414167	0.423162	x_nido
CCDC39	stri	nido	0.753938	0.0247641	-0.55704	-0.495543	-0.388636	0.429284	0.472664	0.526261	0.635069	stri_nido
CCDC39	ra	x	0.908561	0.0440705	-0.4748	-0.399208	-0.342367	0.293649	0.408726	0.535206	0.584688	ra_x
CCDC39	arco	x	0.817261	-0.0162505	-0.487065	-0.418979	-0.385828	0.31164	0.369505	0.441598	0.458564	arco_x
CCDC39	hvc	x	0.887804	-0.021379	-0.570899	-0.512302	-0.499432	0.292851	0.37	0.386508	0.512557	hvc_x
CCDC39	ncl	x	0.784262	0.00527854	-0.460943	-0.442326	-0.383949	0.381274	0.443181	0.50171	0.531425	ncl_x
CCDC39	lman	x	0.890424	-0.0111397	-0.508414	-0.476627	-0.415624	0.296356	0.364905	0.456179	0.522184	lman_x
CCDC39	nido	x	0.816068	-0.0156103	-0.435243	-0.401797	-0.362865	0.283858	0.3482	0.414167	0.423162	nido_x
CCDC39	stri	x	0.940255	-0.0136018	-0.442884	-0.39327	-0.352779	0.32286	0.405007	0.455938	0.559347	stri_x
CCDC39	ra	stri	0.859597	-0.00921203	-0.41827	-0.383564	-0.360161	0.376902	0.466886	0.49327	0.533978	ra_stri
CCDC39	arco	stri	0.808896	-0.0316866	-0.609	-0.500218	-0.452442	0.267465	0.321401	0.348439	0.490017	arco_stri
CCDC39	hvc	stri	0.827033	0.0173465	-0.521936	-0.480326	-0.416101	0.357711	0.514782	0.593672	0.630796	hvc_stri
CCDC39	ncl	stri	0.822977	0.0625124	-0.418035	-0.379902	-0.326144	0.397515	0.476033	0.487578	0.55088	ncl_stri
CCDC39	lman	stri	0.819159	0.0378504	-0.504876	-0.421708	-0.318922	0.331952	0.416629	0.539866	0.601603	lman_stri
CCDC39	nido	stri	0.753938	0.0247641	-0.55704	-0.495543	-0.388636	0.429284	0.472664	0.526261	0.635069	nido_stri
CCDC39	x	stri	0.940255	-0.0136018	-0.442884	-0.39327	-0.352779	0.32286	0.405007	0.455938	0.559347	x_stri
CCDC66	ncl	ra	-0.514566	0.0418959	-0.457189	-0.419384	-0.370187	0.332939	0.413763	0.456122	0.553555	ncl_ra
CCDC66	ra	ncl	-0.514566	0.0418959	-0.457189	-0.419384	-0.370187	0.332939	0.413763	0.456122	0.553555	ra_ncl
CCDC85C	nido	ra	-0.511092	0.00930147	-0.435203	-0.401843	-0.370926	0.296653	0.321728	0.365289	0.436498	nido_ra
CCDC85C	ra	nido	-0.511092	0.00930147	-0.435203	-0.401843	-0.370926	0.296653	0.321728	0.365289	0.436498	ra_nido
CCDC88C	nido	lman	0.568896	-0.00131439	-0.500829	-0.462602	-0.370788	0.232435	0.331035	0.470872	0.552309	nido_lman
CCDC88C	stri	lman	0.522309	-0.00471476	-0.553256	-0.518013	-0.380623	0.274174	0.360195	0.418142	0.478107	stri_lman
CCDC88C	lman	nido	0.568896	-0.00131439	-0.500829	-0.462602	-0.370788	0.232435	0.331035	0.470872	0.552309	lman_nido
CCDC88C	lman	stri	0.522309	-0.00471476	-0.553256	-0.518013	-0.380623	0.274174	0.360195	0.418142	0.478107	lman_stri
CCNG1	hvc	arco	0.446636	-0.04657	-0.493002	-0.473316	-0.456829	0.231805	0.308352	0.355763	0.379108	hvc_arco
CCNG1	arco	hvc	0.446636	-0.04657	-0.493002	-0.473316	-0.456829	0.231805	0.308352	0.355763	0.379108	arco_hvc
CCNT2	lman	ncl	0.731408	0.00865678	-0.414027	-0.409765	-0.374576	0.274634	0.373874	0.482334	0.602549	lman_ncl
CCNT2	ncl	lman	0.731408	0.00865678	-0.414027	-0.409765	-0.374576	0.274634	0.373874	0.482334	0.602549	ncl_lman
CD164L2	arco	ra	0.564509	0.0122947	-0.510926	-0.475655	-0.429288	0.28511	0.474023	0.534337	0.560065	arco_ra
CD164L2	ncl	ra	0.499827	0.0170311	-0.494911	-0.392984	-0.299404	0.28705	0.3729	0.398494	0.415463	ncl_ra
CD164L2	lman	ra	0.668117	-0.0129789	-0.586313	-0.523336	-0.440437	0.284193	0.361629	0.426989	0.497314	lman_ra
CD164L2	ra	arco	0.564509	0.0122947	-0.510926	-0.475655	-0.429288	0.28511	0.474023	0.534337	0.560065	ra_arco
CD164L2	hvc	arco	0.6273	0.0402974	-0.416833	-0.373964	-0.318745	0.338384	0.402994	0.442542	0.489033	hvc_arco
CD164L2	arco	hvc	0.6273	0.0402974	-0.416833	-0.373964	-0.318745	0.338384	0.402994	0.442542	0.489033	arco_hvc
CD164L2	lman	hvc	0.542847	-0.0399518	-0.547976	-0.449461	-0.38845	0.268564	0.340476	0.362447	0.483547	lman_hvc
CD164L2	ra	ncl	0.499827	0.0170311	-0.494911	-0.392984	-0.299404	0.28705	0.3729	0.398494	0.415463	ra_ncl
CD164L2	ra	lman	0.668117	-0.0129789	-0.586313	-0.523336	-0.440437	0.284193	0.361629	0.426989	0.497314	ra_lman
CD164L2	hvc	lman	0.542847	-0.0399518	-0.547976	-0.449461	-0.38845	0.268564	0.340476	0.362447	0.483547	hvc_lman
CD37	x	nido	0.645981	0.00549768	-0.475851	-0.384367	-0.319463	0.372088	0.544403	0.61179	0.61681	x_nido
CD37	nido	x	0.645981	0.00549768	-0.475851	-0.384367	-0.319463	0.372088	0.544403	0.61179	0.61681	nido_x
CD38	nido	ra	0.467902	-0.0247665	-0.626404	-0.552491	-0.464765	0.308592	0.39674	0.446517	0.451925	nido_ra
CD38	stri	ra	0.526072	-0.0360464	-0.527118	-0.46372	-0.377958	0.352833	0.37367	0.39306	0.501161	stri_ra
CD38	stri	arco	0.528231	0.00773023	-0.547985	-0.46682	-0.416636	0.322492	0.358508	0.407867	0.442295	stri_arco
CD38	ra	nido	0.467902	-0.0247665	-0.626404	-0.552491	-0.464765	0.308592	0.39674	0.446517	0.451925	ra_nido
CD38	stri	nido	0.520554	-0.011172	-0.525292	-0.460128	-0.368372	0.36337	0.434763	0.47572	0.501249	stri_nido
CD38	ra	stri	0.526072	-0.0360464	-0.527118	-0.46372	-0.377958	0.352833	0.37367	0.39306	0.501161	ra_stri
CD38	arco	stri	0.528231	0.00773023	-0.547985	-0.46682	-0.416636	0.322492	0.358508	0.407867	0.442295	arco_stri
CD38	nido	stri	0.520554	-0.011172	-0.525292	-0.460128	-0.368372	0.36337	0.434763	0.47572	0.501249	nido_stri
CD74	arco	ra	0.536437	-0.0122576	-0.457953	-0.43668	-0.39788	0.26028	0.344731	0.453029	0.530671	arco_ra
CD74	lman	ra	0.766583	-0.0274244	-0.552223	-0.513167	-0.440947	0.265088	0.312955	0.388076	0.52373	lman_ra
CD74	ra	arco	0.536437	-0.0122576	-0.457953	-0.43668	-0.39788	0.26028	0.344731	0.453029	0.530671	ra_arco
CD74	lman	arco	0.65028	0.0146094	-0.475645	-0.449849	-0.41769	0.317172	0.404007	0.464345	0.4673	lman_arco
CD74	nido	arco	0.523635	-0.0116508	-0.509027	-0.437157	-0.408941	0.374327	0.419458	0.446122	0.510418	nido_arco
CD74	ncl	hvc	0.693519	0.00566456	-0.626795	-0.479662	-0.407514	0.36374	0.419106	0.485202	0.538809	ncl_hvc
CD74	hvc	ncl	0.693519	0.00566456	-0.626795	-0.479662	-0.407514	0.36374	0.419106	0.485202	0.538809	hvc_ncl
CD74	x	ncl	0.548646	0.00278754	-0.498275	-0.460513	-0.43758	0.346886	0.372816	0.394232	0.399159	x_ncl
CD74	stri	ncl	0.568405	-0.0315337	-0.495701	-0.381295	-0.345227	0.248206	0.408207	0.461563	0.474193	stri_ncl
CD74	ra	lman	0.766583	-0.0274244	-0.552223	-0.513167	-0.440947	0.265088	0.312955	0.388076	0.52373	ra_lman
CD74	arco	lman	0.65028	0.0146094	-0.475645	-0.449849	-0.41769	0.317172	0.404007	0.464345	0.4673	arco_lman
CD74	nido	lman	0.593872	0.00128615	-0.593161	-0.513166	-0.42506	0.298144	0.36105	0.493296	0.530001	nido_lman
CD74	arco	nido	0.523635	-0.0116508	-0.509027	-0.437157	-0.408941	0.374327	0.419458	0.446122	0.510418	arco_nido
CD74	lman	nido	0.593872	0.00128615	-0.593161	-0.513166	-0.42506	0.298144	0.36105	0.493296	0.530001	lman_nido
CD74	ncl	x	0.548646	0.00278754	-0.498275	-0.460513	-0.43758	0.346886	0.372816	0.394232	0.399159	ncl_x
CD74	stri	x	0.783413	-0.00300127	-0.456112	-0.437232	-0.392753	0.285019	0.361688	0.480073	0.641851	stri_x
CD74	ncl	stri	0.568405	-0.0315337	-0.495701	-0.381295	-0.345227	0.248206	0.408207	0.461563	0.474193	ncl_stri
CD74	x	stri	0.783413	-0.00300127	-0.456112	-0.437232	-0.392753	0.285019	0.361688	0.480073	0.641851	x_stri
CDC14B	hvc	ra	0.591712	-0.0337279	-0.535994	-0.512377	-0.414657	0.223551	0.291643	0.34607	0.397531	hvc_ra
CDC14B	ra	hvc	0.591712	-0.0337279	-0.535994	-0.512377	-0.414657	0.223551	0.291643	0.34607	0.397531	ra_hvc
CDC14B	x	hvc	-0.456005	-0.0025615	-0.439003	-0.413187	-0.352118	0.254212	0.399589	0.498362	0.546465	x_hvc
CDC14B	hvc	x	-0.456005	-0.0025615	-0.439003	-0.413187	-0.352118	0.254212	0.399589	0.498362	0.546465	hvc_x
CDC14B	stri	x	0.531519	0.00645359	-0.425642	-0.408618	-0.350596	0.344411	0.39518	0.431675	0.46521	stri_x
CDC14B	x	stri	0.531519	0.00645359	-0.425642	-0.408618	-0.350596	0.344411	0.39518	0.431675	0.46521	x_stri
CDC42SE2-C	hvc	ra	0.585057	0.00851691	-0.517464	-0.440191	-0.419636	0.368577	0.471829	0.522909	0.556845	hvc_ra
CDC42SE2-C	ra	hvc	0.585057	0.00851691	-0.517464	-0.440191	-0.419636	0.368577	0.471829	0.522909	0.556845	ra_hvc
CDC42SE2-C	stri	ncl	0.434513	-0.00953833	-0.446321	-0.383173	-0.327272	0.296788	0.364792	0.383869	0.403047	stri_ncl
CDC42SE2-C	nido	lman	0.597313	0.0146379	-0.531305	-0.405319	-0.375057	0.31564	0.38302	0.429222	0.496098	nido_lman
CDC42SE2-C	lman	nido	0.597313	0.0146379	-0.531305	-0.405319	-0.375057	0.31564	0.38302	0.429222	0.496098	lman_nido
CDC42SE2-C	ncl	stri	0.434513	-0.00953833	-0.446321	-0.383173	-0.327272	0.296788	0.364792	0.383869	0.403047	ncl_stri
CDH18	hvc	arco	0.466344	0.0182511	-0.581101	-0.440027	-0.405059	0.324439	0.390245	0.413378	0.465064	hvc_arco
CDH18	arco	hvc	0.466344	0.0182511	-0.581101	-0.440027	-0.405059	0.324439	0.390245	0.413378	0.465064	arco_hvc
CDH22	hvc	arco	-0.491911	-0.0033338	-0.425531	-0.38868	-0.367104	0.324469	0.391711	0.445847	0.553362	hvc_arco
CDH22	arco	hvc	-0.491911	-0.0033338	-0.425531	-0.38868	-0.367104	0.324469	0.391711	0.445847	0.553362	arco_hvc
CDH22	stri	lman	-0.459995	0.0270521	-0.386739	-0.374222	-0.354983	0.30694	0.379543	0.435639	0.477236	stri_lman
CDH22	lman	stri	-0.459995	0.0270521	-0.386739	-0.374222	-0.354983	0.30694	0.379543	0.435639	0.477236	lman_stri
CDH7	ncl	arco	0.597534	0.024547	-0.45343	-0.423319	-0.332083	0.353985	0.401662	0.450887	0.517736	ncl_arco
CDH7	arco	ncl	0.597534	0.024547	-0.45343	-0.423319	-0.332083	0.353985	0.401662	0.450887	0.517736	arco_ncl
CDH7	x	ncl	0.483082	-0.0497237	-0.484023	-0.463346	-0.437092	0.227803	0.342917	0.357166	0.443315	x_ncl
CDH7	ncl	x	0.483082	-0.0497237	-0.484023	-0.463346	-0.437092	0.227803	0.342917	0.357166	0.443315	ncl_x
CDK5	nido	ra	0.676501	0.0214203	-0.479731	-0.433029	-0.392104	0.33881	0.465747	0.563153	0.610577	nido_ra
CDK5	ncl	hvc	0.731505	0.0301209	-0.47007	-0.450505	-0.411001	0.355298	0.453808	0.49648	0.53174	ncl_hvc
CDK5	hvc	ncl	0.731505	0.0301209	-0.47007	-0.450505	-0.411001	0.355298	0.453808	0.49648	0.53174	hvc_ncl
CDK5	ra	nido	0.676501	0.0214203	-0.479731	-0.433029	-0.392104	0.33881	0.465747	0.563153	0.610577	ra_nido
CDK5	stri	x	0.709915	0.00264939	-0.447403	-0.417617	-0.369074	0.292383	0.455395	0.506952	0.528759	stri_x
CDK5	x	stri	0.709915	0.00264939	-0.447403	-0.417617	-0.369074	0.292383	0.455395	0.506952	0.528759	x_stri
CDK5RAP1	arco	ra	0.540262	-0.0450943	-0.523406	-0.460314	-0.381623	0.225718	0.341755	0.403376	0.500828	arco_ra
CDK5RAP1	ncl	ra	0.752444	-0.00744213	-0.440681	-0.418549	-0.397522	0.287855	0.424771	0.570208	0.605752	ncl_ra
CDK5RAP1	x	ra	0.401309	0.00115188	-0.478908	-0.415633	-0.355769	0.268164	0.329844	0.367123	0.381298	x_ra
CDK5RAP1	stri	ra	0.701447	0.00934737	-0.413191	-0.369684	-0.332276	0.308431	0.362747	0.456246	0.535261	stri_ra
CDK5RAP1	ra	arco	0.540262	-0.0450943	-0.523406	-0.460314	-0.381623	0.225718	0.341755	0.403376	0.500828	ra_arco
CDK5RAP1	x	arco	0.609993	-0.0357792	-0.504426	-0.484333	-0.419416	0.267196	0.461622	0.49811	0.517382	x_arco
CDK5RAP1	stri	arco	0.731834	-0.025673	-0.57821	-0.539744	-0.492855	0.271847	0.347339	0.398421	0.421989	stri_arco
CDK5RAP1	stri	hvc	0.443095	-0.0366742	-0.478567	-0.435179	-0.404044	0.222579	0.266004	0.40611	0.435069	stri_hvc
CDK5RAP1	ra	ncl	0.752444	-0.00744213	-0.440681	-0.418549	-0.397522	0.287855	0.424771	0.570208	0.605752	ra_ncl
CDK5RAP1	x	nido	0.49589	0.0121272	-0.610587	-0.478346	-0.409446	0.305718	0.372745	0.438217	0.475716	x_nido
CDK5RAP1	stri	nido	0.558356	0.0147486	-0.542993	-0.514336	-0.462235	0.32111	0.393848	0.450524	0.50061	stri_nido
CDK5RAP1	ra	x	0.401309	0.00115188	-0.478908	-0.415633	-0.355769	0.268164	0.329844	0.367123	0.381298	ra_x
CDK5RAP1	arco	x	0.609993	-0.0357792	-0.504426	-0.484333	-0.419416	0.267196	0.461622	0.49811	0.517382	arco_x
CDK5RAP1	nido	x	0.49589	0.0121272	-0.610587	-0.478346	-0.409446	0.305718	0.372745	0.438217	0.475716	nido_x
CDK5RAP1	stri	x	0.664559	0.0243244	-0.542761	-0.45753	-0.440245	0.381504	0.464866	0.549668	0.553765	stri_x
CDK5RAP1	ra	stri	0.701447	0.00934737	-0.413191	-0.369684	-0.332276	0.308431	0.362747	0.456246	0.535261	ra_stri
CDK5RAP1	arco	stri	0.731834	-0.025673	-0.57821	-0.539744	-0.492855	0.271847	0.347339	0.398421	0.421989	arco_stri
CDK5RAP1	hvc	stri	0.443095	-0.0366742	-0.478567	-0.435179	-0.404044	0.222579	0.266004	0.40611	0.435069	hvc_stri
CDK5RAP1	nido	stri	0.558356	0.0147486	-0.542993	-0.514336	-0.462235	0.32111	0.393848	0.450524	0.50061	nido_stri
CDK5RAP1	x	stri	0.664559	0.0243244	-0.542761	-0.45753	-0.440245	0.381504	0.464866	0.549668	0.553765	x_stri
CDK7	arco	ra	0.536057	-0.00785155	-0.445308	-0.375581	-0.341584	0.246574	0.363324	0.465272	0.480945	arco_ra
CDK7	hvc	ra	0.663466	0.0177234	-0.487257	-0.450149	-0.42354	0.365992	0.432083	0.544306	0.604166	hvc_ra
CDK7	ncl	ra	0.537045	0.0314869	-0.475188	-0.438777	-0.311429	0.318031	0.399736	0.462428	0.491935	ncl_ra
CDK7	nido	ra	0.691486	-0.0222108	-0.526478	-0.467752	-0.405874	0.31759	0.404308	0.466565	0.474142	nido_ra
CDK7	x	ra	0.580547	-0.00700804	-0.456777	-0.44424	-0.391099	0.26379	0.365735	0.438959	0.48465	x_ra
CDK7	stri	ra	0.671174	-0.00608223	-0.56909	-0.512756	-0.431707	0.294676	0.396513	0.481147	0.56985	stri_ra
CDK7	ra	arco	0.536057	-0.00785155	-0.445308	-0.375581	-0.341584	0.246574	0.363324	0.465272	0.480945	ra_arco
CDK7	lman	arco	0.554314	-0.0438179	-0.566462	-0.489834	-0.447054	0.249298	0.301298	0.35337	0.382842	lman_arco
CDK7	stri	arco	0.457798	-0.0109913	-0.464845	-0.412925	-0.378314	0.311439	0.369107	0.42884	0.449359	stri_arco
CDK7	ra	hvc	0.663466	0.0177234	-0.487257	-0.450149	-0.42354	0.365992	0.432083	0.544306	0.604166	ra_hvc
CDK7	ncl	hvc	0.610775	0.00311637	-0.489367	-0.45782	-0.406818	0.342039	0.409591	0.468036	0.607082	ncl_hvc
CDK7	x	hvc	0.585342	0.0427966	-0.465947	-0.348286	-0.315246	0.300988	0.460327	0.483146	0.513947	x_hvc
CDK7	stri	hvc	0.722722	-0.0288608	-0.463161	-0.434852	-0.345334	0.242117	0.312784	0.327769	0.36875	stri_hvc
CDK7	ra	ncl	0.537045	0.0314869	-0.475188	-0.438777	-0.311429	0.318031	0.399736	0.462428	0.491935	ra_ncl
CDK7	hvc	ncl	0.610775	0.00311637	-0.489367	-0.45782	-0.406818	0.342039	0.409591	0.468036	0.607082	hvc_ncl
CDK7	lman	ncl	0.634124	0.0195693	-0.47766	-0.43756	-0.383531	0.38287	0.417011	0.488232	0.558163	lman_ncl
CDK7	nido	ncl	0.652835	0.0286617	-0.486635	-0.456175	-0.355482	0.314699	0.497964	0.534957	0.571263	nido_ncl
CDK7	x	ncl	0.528116	0.0322665	-0.470494	-0.44042	-0.383321	0.362479	0.424221	0.456659	0.484992	x_ncl
CDK7	stri	ncl	0.693484	0.0113186	-0.508906	-0.470313	-0.413695	0.37892	0.410906	0.461465	0.525585	stri_ncl
CDK7	arco	lman	0.554314	-0.0438179	-0.566462	-0.489834	-0.447054	0.249298	0.301298	0.35337	0.382842	arco_lman
CDK7	ncl	lman	0.634124	0.0195693	-0.47766	-0.43756	-0.383531	0.38287	0.417011	0.488232	0.558163	ncl_lman
CDK7	x	lman	0.365783	-0.0569833	-0.525514	-0.475245	-0.448202	0.231182	0.29725	0.322767	0.357384	x_lman
CDK7	ra	nido	0.691486	-0.0222108	-0.526478	-0.467752	-0.405874	0.31759	0.404308	0.466565	0.474142	ra_nido
CDK7	ncl	nido	0.652835	0.0286617	-0.486635	-0.456175	-0.355482	0.314699	0.497964	0.534957	0.571263	ncl_nido
CDK7	x	nido	0.641767	-0.00279181	-0.461207	-0.42182	-0.385033	0.305675	0.409702	0.440797	0.50873	x_nido
CDK7	stri	nido	0.698145	-0.0216381	-0.484964	-0.408736	-0.378301	0.288599	0.355199	0.403527	0.421661	stri_nido
CDK7	ra	x	0.580547	-0.00700804	-0.456777	-0.44424	-0.391099	0.26379	0.365735	0.438959	0.48465	ra_x
CDK7	hvc	x	0.585342	0.0427966	-0.465947	-0.348286	-0.315246	0.300988	0.460327	0.483146	0.513947	hvc_x
CDK7	ncl	x	0.528116	0.0322665	-0.470494	-0.44042	-0.383321	0.362479	0.424221	0.456659	0.484992	ncl_x
CDK7	lman	x	0.365783	-0.0569833	-0.525514	-0.475245	-0.448202	0.231182	0.29725	0.322767	0.357384	lman_x
CDK7	nido	x	0.641767	-0.00279181	-0.461207	-0.42182	-0.385033	0.305675	0.409702	0.440797	0.50873	nido_x
CDK7	stri	x	0.689658	-0.0297715	-0.478923	-0.414338	-0.377809	0.286647	0.33082	0.426454	0.476859	stri_x
CDK7	ra	stri	0.671174	-0.00608223	-0.56909	-0.512756	-0.431707	0.294676	0.396513	0.481147	0.56985	ra_stri
CDK7	arco	stri	0.457798	-0.0109913	-0.464845	-0.412925	-0.378314	0.311439	0.369107	0.42884	0.449359	arco_stri
CDK7	hvc	stri	0.722722	-0.0288608	-0.463161	-0.434852	-0.345334	0.242117	0.312784	0.327769	0.36875	hvc_stri
CDK7	ncl	stri	0.693484	0.0113186	-0.508906	-0.470313	-0.413695	0.37892	0.410906	0.461465	0.525585	ncl_stri
CDK7	nido	stri	0.698145	-0.0216381	-0.484964	-0.408736	-0.378301	0.288599	0.355199	0.403527	0.421661	nido_stri
CDK7	x	stri	0.689658	-0.0297715	-0.478923	-0.414338	-0.377809	0.286647	0.33082	0.426454	0.476859	x_stri
CDKN2AIP	ncl	arco	-0.53202	-0.061112	-0.489239	-0.444165	-0.421082	0.229079	0.362318	0.440783	0.499909	ncl_arco
CDKN2AIP	arco	ncl	-0.53202	-0.061112	-0.489239	-0.444165	-0.421082	0.229079	0.362318	0.440783	0.499909	arco_ncl
CDO1	nido	ncl	0.634114	-0.0138051	-0.473943	-0.440371	-0.402893	0.287932	0.38459	0.445296	0.450515	nido_ncl
CDO1	ncl	nido	0.634114	-0.0138051	-0.473943	-0.440371	-0.402893	0.287932	0.38459	0.445296	0.450515	ncl_nido
CELSR3	stri	ra	0.511164	-0.0362717	-0.50016	-0.48487	-0.436008	0.333769	0.404674	0.453477	0.501343	stri_ra
CELSR3	ra	stri	0.511164	-0.0362717	-0.50016	-0.48487	-0.436008	0.333769	0.404674	0.453477	0.501343	ra_stri
CENPH	lman	ra	0.611191	0.0390215	-0.536286	-0.473233	-0.32552	0.325142	0.396825	0.46766	0.501709	lman_ra
CENPH	nido	ra	0.578129	-0.0293117	-0.467561	-0.418196	-0.375315	0.276498	0.330594	0.364412	0.407113	nido_ra
CENPH	x	ra	0.598083	-0.0324766	-0.537012	-0.477435	-0.404243	0.319196	0.371504	0.550139	0.584058	x_ra
CENPH	hvc	arco	0.492874	0.00890626	-0.378781	-0.365819	-0.33981	0.356654	0.384449	0.414263	0.460881	hvc_arco
CENPH	lman	arco	0.462096	-0.0151441	-0.487125	-0.476312	-0.464142	0.279764	0.322426	0.424474	0.451001	lman_arco
CENPH	stri	arco	0.6977	-0.0298344	-0.582017	-0.556632	-0.482513	0.358118	0.425157	0.489594	0.501367	stri_arco
CENPH	arco	hvc	0.492874	0.00890626	-0.378781	-0.365819	-0.33981	0.356654	0.384449	0.414263	0.460881	arco_hvc
CENPH	nido	ncl	0.754313	-0.0100337	-0.58433	-0.545787	-0.481501	0.309863	0.428972	0.474196	0.574137	nido_ncl
CENPH	ra	lman	0.611191	0.0390215	-0.536286	-0.473233	-0.32552	0.325142	0.396825	0.46766	0.501709	ra_lman
CENPH	arco	lman	0.462096	-0.0151441	-0.487125	-0.476312	-0.464142	0.279764	0.322426	0.424474	0.451001	arco_lman
CENPH	stri	lman	0.440012	0.025456	-0.522874	-0.398483	-0.380041	0.332475	0.400536	0.415742	0.429523	stri_lman
CENPH	ra	nido	0.578129	-0.0293117	-0.467561	-0.418196	-0.375315	0.276498	0.330594	0.364412	0.407113	ra_nido
CENPH	ncl	nido	0.754313	-0.0100337	-0.58433	-0.545787	-0.481501	0.309863	0.428972	0.474196	0.574137	ncl_nido
CENPH	x	nido	0.569699	0.0558512	-0.391129	-0.342426	-0.329701	0.351682	0.428927	0.460257	0.48028	x_nido
CENPH	ra	x	0.598083	-0.0324766	-0.537012	-0.477435	-0.404243	0.319196	0.371504	0.550139	0.584058	ra_x
CENPH	nido	x	0.569699	0.0558512	-0.391129	-0.342426	-0.329701	0.351682	0.428927	0.460257	0.48028	nido_x
CENPH	arco	stri	0.6977	-0.0298344	-0.582017	-0.556632	-0.482513	0.358118	0.425157	0.489594	0.501367	arco_stri
CENPH	lman	stri	0.440012	0.025456	-0.522874	-0.398483	-0.380041	0.332475	0.400536	0.415742	0.429523	lman_stri
CENPU	lman	ra	0.518417	-0.0212011	-0.536687	-0.484513	-0.425316	0.305686	0.383571	0.401419	0.473386	lman_ra
CENPU	lman	arco	0.703823	-0.00107697	-0.544365	-0.428288	-0.33503	0.317867	0.358082	0.373427	0.48957	lman_arco
CENPU	x	arco	0.597113	-0.0376534	-0.581588	-0.515657	-0.42889	0.240059	0.318463	0.414101	0.436615	x_arco
CENPU	ncl	hvc	0.744498	-0.0184099	-0.504451	-0.465288	-0.376243	0.324321	0.366878	0.474608	0.571981	ncl_hvc
CENPU	lman	hvc	0.596994	-0.0658362	-0.555934	-0.528494	-0.486617	0.26671	0.314868	0.499233	0.546005	lman_hvc
CENPU	nido	hvc	0.607446	-0.00589204	-0.490776	-0.473916	-0.450541	0.312373	0.393482	0.566133	0.598686	nido_hvc
CENPU	x	hvc	0.638498	0.0166701	-0.406926	-0.389292	-0.330237	0.31588	0.422036	0.473031	0.487112	x_hvc
CENPU	hvc	ncl	0.744498	-0.0184099	-0.504451	-0.465288	-0.376243	0.324321	0.366878	0.474608	0.571981	hvc_ncl
CENPU	lman	ncl	0.667028	0.0160312	-0.459297	-0.427962	-0.37527	0.299269	0.332179	0.357936	0.398038	lman_ncl
CENPU	nido	ncl	0.558468	-0.030764	-0.475671	-0.440066	-0.364551	0.264425	0.32485	0.385551	0.49794	nido_ncl
CENPU	ra	lman	0.518417	-0.0212011	-0.536687	-0.484513	-0.425316	0.305686	0.383571	0.401419	0.473386	ra_lman
CENPU	arco	lman	0.703823	-0.00107697	-0.544365	-0.428288	-0.33503	0.317867	0.358082	0.373427	0.48957	arco_lman
CENPU	hvc	lman	0.596994	-0.0658362	-0.555934	-0.528494	-0.486617	0.26671	0.314868	0.499233	0.546005	hvc_lman
CENPU	ncl	lman	0.667028	0.0160312	-0.459297	-0.427962	-0.37527	0.299269	0.332179	0.357936	0.398038	ncl_lman
CENPU	nido	lman	0.541156	-0.0122693	-0.597637	-0.509035	-0.407852	0.327321	0.361832	0.424908	0.46983	nido_lman
CENPU	x	lman	0.680397	-0.0279468	-0.513491	-0.503365	-0.369272	0.280165	0.391719	0.453095	0.513911	x_lman
CENPU	hvc	nido	0.607446	-0.00589204	-0.490776	-0.473916	-0.450541	0.312373	0.393482	0.566133	0.598686	hvc_nido
CENPU	ncl	nido	0.558468	-0.030764	-0.475671	-0.440066	-0.364551	0.264425	0.32485	0.385551	0.49794	ncl_nido
CENPU	lman	nido	0.541156	-0.0122693	-0.597637	-0.509035	-0.407852	0.327321	0.361832	0.424908	0.46983	lman_nido
CENPU	x	nido	0.760517	-0.0298459	-0.467756	-0.446471	-0.405545	0.315806	0.411371	0.49792	0.619117	x_nido
CENPU	arco	x	0.597113	-0.0376534	-0.581588	-0.515657	-0.42889	0.240059	0.318463	0.414101	0.436615	arco_x
CENPU	hvc	x	0.638498	0.0166701	-0.406926	-0.389292	-0.330237	0.31588	0.422036	0.473031	0.487112	hvc_x
CENPU	lman	x	0.680397	-0.0279468	-0.513491	-0.503365	-0.369272	0.280165	0.391719	0.453095	0.513911	lman_x
CENPU	nido	x	0.760517	-0.0298459	-0.467756	-0.446471	-0.405545	0.315806	0.411371	0.49792	0.619117	nido_x
CENPU	stri	x	0.65324	-0.0300321	-0.502982	-0.397942	-0.332024	0.237895	0.265048	0.355679	0.418166	stri_x
CENPU	x	stri	0.65324	-0.0300321	-0.502982	-0.397942	-0.332024	0.237895	0.265048	0.355679	0.418166	x_stri
CENPW	nido	ra	0.528967	0.0306534	-0.45289	-0.437162	-0.417291	0.30575	0.378654	0.482117	0.49689	nido_ra
CENPW	x	arco	0.483562	-0.00571691	-0.508499	-0.422322	-0.367404	0.303999	0.375799	0.431017	0.435324	x_arco
CENPW	nido	lman	0.702348	-0.0241942	-0.486208	-0.45088	-0.421919	0.255817	0.309581	0.362856	0.508929	nido_lman
CENPW	ra	nido	0.528967	0.0306534	-0.45289	-0.437162	-0.417291	0.30575	0.378654	0.482117	0.49689	ra_nido
CENPW	lman	nido	0.702348	-0.0241942	-0.486208	-0.45088	-0.421919	0.255817	0.309581	0.362856	0.508929	lman_nido
CENPW	arco	x	0.483562	-0.00571691	-0.508499	-0.422322	-0.367404	0.303999	0.375799	0.431017	0.435324	arco_x
CEP41	arco	ra	0.749462	-0.0315129	-0.502516	-0.497232	-0.446327	0.314566	0.396468	0.428977	0.598864	arco_ra
CEP41	ncl	ra	0.540875	0.0350299	-0.655439	-0.514423	-0.369054	0.313866	0.359978	0.419608	0.452642	ncl_ra
CEP41	ra	arco	0.749462	-0.0315129	-0.502516	-0.497232	-0.446327	0.314566	0.396468	0.428977	0.598864	ra_arco
CEP41	ra	ncl	0.540875	0.0350299	-0.655439	-0.514423	-0.369054	0.313866	0.359978	0.419608	0.452642	ra_ncl
CEP41	nido	lman	0.520823	0.00956652	-0.561404	-0.400152	-0.337831	0.287593	0.361512	0.41543	0.51286	nido_lman
CEP41	lman	nido	0.520823	0.00956652	-0.561404	-0.400152	-0.337831	0.287593	0.361512	0.41543	0.51286	lman_nido
CEP57	nido	hvc	-0.451751	-0.0111245	-0.391829	-0.366562	-0.310778	0.240209	0.327583	0.366379	0.429526	nido_hvc
CEP57	x	lman	0.563816	-0.00107654	-0.65552	-0.605723	-0.445889	0.318737	0.358173	0.419973	0.453655	x_lman
CEP57	hvc	nido	-0.451751	-0.0111245	-0.391829	-0.366562	-0.310778	0.240209	0.327583	0.366379	0.429526	hvc_nido
CEP57	lman	x	0.563816	-0.00107654	-0.65552	-0.605723	-0.445889	0.318737	0.358173	0.419973	0.453655	lman_x
CEP57	stri	x	0.508364	-0.0340594	-0.521303	-0.519305	-0.487347	0.261636	0.400345	0.422677	0.470879	stri_x
CEP57	x	stri	0.508364	-0.0340594	-0.521303	-0.519305	-0.487347	0.261636	0.400345	0.422677	0.470879	x_stri
CEP83	nido	ra	0.538143	-0.0137791	-0.621262	-0.425966	-0.378375	0.240637	0.299784	0.35265	0.462886	nido_ra
CEP83	hvc	arco	0.504958	0.0100381	-0.555631	-0.458426	-0.430206	0.325087	0.431114	0.439256	0.498486	hvc_arco
CEP83	lman	arco	0.535031	-0.0192522	-0.571173	-0.540685	-0.456839	0.294235	0.429289	0.449908	0.497659	lman_arco
CEP83	x	arco	0.488907	0.025048	-0.444343	-0.415191	-0.340108	0.351271	0.392052	0.408519	0.42467	x_arco
CEP83	arco	hvc	0.504958	0.0100381	-0.555631	-0.458426	-0.430206	0.325087	0.431114	0.439256	0.498486	arco_hvc
CEP83	lman	hvc	0.500589	0.0646355	-0.566042	-0.506482	-0.397439	0.356395	0.4198	0.453004	0.477053	lman_hvc
CEP83	x	hvc	0.4846	-0.0132586	-0.426049	-0.418042	-0.382564	0.293671	0.344374	0.352616	0.45228	x_hvc
CEP83	arco	lman	0.535031	-0.0192522	-0.571173	-0.540685	-0.456839	0.294235	0.429289	0.449908	0.497659	arco_lman
CEP83	hvc	lman	0.500589	0.0646355	-0.566042	-0.506482	-0.397439	0.356395	0.4198	0.453004	0.477053	hvc_lman
CEP83	nido	lman	0.547603	-0.0344857	-0.468198	-0.455001	-0.435823	0.2291	0.336275	0.413985	0.438286	nido_lman
CEP83	ra	nido	0.538143	-0.0137791	-0.621262	-0.425966	-0.378375	0.240637	0.299784	0.35265	0.462886	ra_nido
CEP83	lman	nido	0.547603	-0.0344857	-0.468198	-0.455001	-0.435823	0.2291	0.336275	0.413985	0.438286	lman_nido
CEP83	stri	nido	0.661084	0.00199764	-0.554201	-0.430155	-0.376109	0.361817	0.435248	0.510815	0.543144	stri_nido
CEP83	arco	x	0.488907	0.025048	-0.444343	-0.415191	-0.340108	0.351271	0.392052	0.408519	0.42467	arco_x
CEP83	hvc	x	0.4846	-0.0132586	-0.426049	-0.418042	-0.382564	0.293671	0.344374	0.352616	0.45228	hvc_x
CEP83	stri	x	0.632956	0.00063141	-0.532049	-0.471489	-0.382475	0.28595	0.353261	0.417564	0.496859	stri_x
CEP83	nido	stri	0.661084	0.00199764	-0.554201	-0.430155	-0.376109	0.361817	0.435248	0.510815	0.543144	nido_stri
CEP83	x	stri	0.632956	0.00063141	-0.532049	-0.471489	-0.382475	0.28595	0.353261	0.417564	0.496859	x_stri
CEPT1	arco	ra	0.773797	0.0293835	-0.396714	-0.352693	-0.322429	0.311854	0.399404	0.436578	0.51408	arco_ra
CEPT1	lman	ra	0.559297	-0.0210307	-0.681553	-0.509755	-0.43051	0.37435	0.40868	0.453407	0.455985	lman_ra
CEPT1	ra	arco	0.773797	0.0293835	-0.396714	-0.352693	-0.322429	0.311854	0.399404	0.436578	0.51408	ra_arco
CEPT1	lman	ncl	0.513059	-0.0094254	-0.4423	-0.367898	-0.323492	0.329135	0.427612	0.454302	0.485266	lman_ncl
CEPT1	ra	lman	0.559297	-0.0210307	-0.681553	-0.509755	-0.43051	0.37435	0.40868	0.453407	0.455985	ra_lman
CEPT1	ncl	lman	0.513059	-0.0094254	-0.4423	-0.367898	-0.323492	0.329135	0.427612	0.454302	0.485266	ncl_lman
CEPT1	nido	lman	0.559707	0.0022815	-0.447261	-0.412177	-0.33588	0.328023	0.405839	0.472731	0.538126	nido_lman
CEPT1	lman	nido	0.559707	0.0022815	-0.447261	-0.412177	-0.33588	0.328023	0.405839	0.472731	0.538126	lman_nido
CEPT1	x	nido	0.757923	0.0388669	-0.537653	-0.464314	-0.331316	0.380376	0.477643	0.569681	0.605273	x_nido
CEPT1	stri	nido	0.727209	6.93251e-05	-0.463917	-0.42383	-0.38418	0.284	0.391089	0.482486	0.591055	stri_nido
CEPT1	nido	x	0.757923	0.0388669	-0.537653	-0.464314	-0.331316	0.380376	0.477643	0.569681	0.605273	nido_x
CEPT1	stri	x	0.645121	0.0126839	-0.445983	-0.389686	-0.357524	0.246198	0.396022	0.448494	0.452135	stri_x
CEPT1	nido	stri	0.727209	6.93251e-05	-0.463917	-0.42383	-0.38418	0.284	0.391089	0.482486	0.591055	nido_stri
CEPT1	x	stri	0.645121	0.0126839	-0.445983	-0.389686	-0.357524	0.246198	0.396022	0.448494	0.452135	x_stri
CERCAM	ncl	hvc	0.620066	0.00563784	-0.444418	-0.41158	-0.378213	0.292709	0.330875	0.392436	0.447832	ncl_hvc
CERCAM	stri	hvc	0.703588	-0.00181614	-0.383227	-0.33547	-0.287132	0.240774	0.301743	0.35213	0.365674	stri_hvc
CERCAM	hvc	ncl	0.620066	0.00563784	-0.444418	-0.41158	-0.378213	0.292709	0.330875	0.392436	0.447832	hvc_ncl
CERCAM	hvc	stri	0.703588	-0.00181614	-0.383227	-0.33547	-0.287132	0.240774	0.301743	0.35213	0.365674	hvc_stri
CERS4	nido	ra	0.538902	0.0263173	-0.417934	-0.378139	-0.361512	0.304183	0.403761	0.452906	0.480903	nido_ra
CERS4	x	hvc	0.5008	0.00563807	-0.493515	-0.466559	-0.388515	0.311431	0.371363	0.433285	0.466059	x_hvc
CERS4	nido	lman	0.595752	-0.0328854	-0.58076	-0.579499	-0.441996	0.295752	0.411571	0.457203	0.504223	nido_lman
CERS4	ra	nido	0.538902	0.0263173	-0.417934	-0.378139	-0.361512	0.304183	0.403761	0.452906	0.480903	ra_nido
CERS4	lman	nido	0.595752	-0.0328854	-0.58076	-0.579499	-0.441996	0.295752	0.411571	0.457203	0.504223	lman_nido
CERS4	hvc	x	0.5008	0.00563807	-0.493515	-0.466559	-0.388515	0.311431	0.371363	0.433285	0.466059	hvc_x
CERS5	ncl	arco	-0.469274	-0.0114097	-0.423515	-0.416662	-0.371295	0.257853	0.312425	0.360639	0.393274	ncl_arco
CERS5	arco	ncl	-0.469274	-0.0114097	-0.423515	-0.416662	-0.371295	0.257853	0.312425	0.360639	0.393274	arco_ncl
CERS5	stri	lman	0.468641	-0.00746205	-0.509235	-0.494426	-0.464338	0.285645	0.31288	0.384045	0.39633	stri_lman
CERS5	x	nido	0.596858	-0.0302212	-0.508142	-0.505985	-0.48896	0.283531	0.351976	0.392188	0.400086	x_nido
CERS5	stri	nido	0.681699	0.00496091	-0.384027	-0.36016	-0.33704	0.302199	0.452879	0.492242	0.536333	stri_nido
CERS5	nido	x	0.596858	-0.0302212	-0.508142	-0.505985	-0.48896	0.283531	0.351976	0.392188	0.400086	nido_x
CERS5	stri	x	0.579503	0.0380977	-0.474553	-0.37588	-0.300534	0.324159	0.397178	0.450514	0.512377	stri_x
CERS5	lman	stri	0.468641	-0.00746205	-0.509235	-0.494426	-0.464338	0.285645	0.31288	0.384045	0.39633	lman_stri
CERS5	nido	stri	0.681699	0.00496091	-0.384027	-0.36016	-0.33704	0.302199	0.452879	0.492242	0.536333	nido_stri
CERS5	x	stri	0.579503	0.0380977	-0.474553	-0.37588	-0.300534	0.324159	0.397178	0.450514	0.512377	x_stri
CHAC1	arco	ra	0.706903	-0.0301768	-0.62479	-0.516004	-0.43357	0.32677	0.380272	0.424714	0.543666	arco_ra
CHAC1	ra	arco	0.706903	-0.0301768	-0.62479	-0.516004	-0.43357	0.32677	0.380272	0.424714	0.543666	ra_arco
CHAC1	ncl	arco	0.490345	0.0033599	-0.492678	-0.452033	-0.407253	0.319773	0.35158	0.38329	0.422727	ncl_arco
CHAC1	arco	ncl	0.490345	0.0033599	-0.492678	-0.452033	-0.407253	0.319773	0.35158	0.38329	0.422727	arco_ncl
CHAC1	x	lman	0.525545	-0.0125274	-0.529427	-0.458253	-0.355241	0.277587	0.315519	0.392751	0.426121	x_lman
CHAC1	stri	lman	0.768268	-0.0208162	-0.457483	-0.43657	-0.409175	0.299714	0.440038	0.513011	0.557286	stri_lman
CHAC1	stri	nido	0.795357	-0.0457972	-0.465183	-0.444928	-0.42957	0.371717	0.404194	0.44562	0.514653	stri_nido
CHAC1	lman	x	0.525545	-0.0125274	-0.529427	-0.458253	-0.355241	0.277587	0.315519	0.392751	0.426121	lman_x
CHAC1	stri	x	0.581431	0.0293981	-0.434419	-0.3916	-0.317629	0.343366	0.461156	0.483748	0.530534	stri_x
CHAC1	lman	stri	0.768268	-0.0208162	-0.457483	-0.43657	-0.409175	0.299714	0.440038	0.513011	0.557286	lman_stri
CHAC1	nido	stri	0.795357	-0.0457972	-0.465183	-0.444928	-0.42957	0.371717	0.404194	0.44562	0.514653	nido_stri
CHAC1	x	stri	0.581431	0.0293981	-0.434419	-0.3916	-0.317629	0.343366	0.461156	0.483748	0.530534	x_stri
CHD1L	x	arco	0.588279	-0.00235244	-0.498297	-0.473457	-0.420366	0.302464	0.371136	0.476524	0.518629	x_arco
CHD1L	stri	arco	0.63333	-0.0183169	-0.512249	-0.469317	-0.415027	0.310288	0.34129	0.388955	0.404727	stri_arco
CHD1L	nido	lman	0.593961	-0.0274209	-0.478614	-0.455583	-0.422781	0.318131	0.361851	0.455999	0.563438	nido_lman
CHD1L	lman	nido	0.593961	-0.0274209	-0.478614	-0.455583	-0.422781	0.318131	0.361851	0.455999	0.563438	lman_nido
CHD1L	arco	x	0.588279	-0.00235244	-0.498297	-0.473457	-0.420366	0.302464	0.371136	0.476524	0.518629	arco_x
CHD1L	arco	stri	0.63333	-0.0183169	-0.512249	-0.469317	-0.415027	0.310288	0.34129	0.388955	0.404727	arco_stri
CHEK1	hvc	arco	-0.543095	0.0620697	-0.401136	-0.373527	-0.352333	0.421497	0.494586	0.508341	0.532681	hvc_arco
CHEK1	arco	hvc	-0.543095	0.0620697	-0.401136	-0.373527	-0.352333	0.421497	0.494586	0.508341	0.532681	arco_hvc
CHEK1	stri	hvc	0.578242	0.0222524	-0.372067	-0.348636	-0.308525	0.322072	0.445974	0.549477	0.566332	stri_hvc
CHEK1	lman	ncl	0.696875	0.0382836	-0.417401	-0.396849	-0.324876	0.349377	0.455355	0.488012	0.498163	lman_ncl
CHEK1	ncl	lman	0.696875	0.0382836	-0.417401	-0.396849	-0.324876	0.349377	0.455355	0.488012	0.498163	ncl_lman
CHEK1	hvc	stri	0.578242	0.0222524	-0.372067	-0.348636	-0.308525	0.322072	0.445974	0.549477	0.566332	hvc_stri
CHRM4	lman	ra	0.541307	-0.0062096	-0.452055	-0.431483	-0.410051	0.303248	0.360243	0.388127	0.411687	lman_ra
CHRM4	stri	hvc	0.415205	-0.0245839	-0.464602	-0.44885	-0.369481	0.263524	0.304861	0.342021	0.355425	stri_hvc
CHRM4	ra	lman	0.541307	-0.0062096	-0.452055	-0.431483	-0.410051	0.303248	0.360243	0.388127	0.411687	ra_lman
CHRM4	nido	lman	0.735207	-0.00225408	-0.501253	-0.432574	-0.383775	0.264051	0.367546	0.400815	0.480625	nido_lman
CHRM4	lman	nido	0.735207	-0.00225408	-0.501253	-0.432574	-0.383775	0.264051	0.367546	0.400815	0.480625	lman_nido
CHRM4	x	nido	-0.643903	-0.0291677	-0.629448	-0.56367	-0.520574	0.294907	0.343374	0.38178	0.460631	x_nido
CHRM4	nido	x	-0.643903	-0.0291677	-0.629448	-0.56367	-0.520574	0.294907	0.343374	0.38178	0.460631	nido_x
CHRM4	hvc	stri	0.415205	-0.0245839	-0.464602	-0.44885	-0.369481	0.263524	0.304861	0.342021	0.355425	hvc_stri
CHRNA4	arco	ra	0.61391	-0.0122824	-0.4608	-0.438015	-0.417752	0.374534	0.448953	0.478375	0.512013	arco_ra
CHRNA4	nido	ra	0.485743	-0.00426307	-0.511404	-0.471937	-0.405626	0.266854	0.319303	0.36485	0.421571	nido_ra
CHRNA4	stri	ra	0.649469	-0.0182093	-0.484335	-0.410432	-0.344995	0.248477	0.372572	0.444169	0.47689	stri_ra
CHRNA4	ra	arco	0.61391	-0.0122824	-0.4608	-0.438015	-0.417752	0.374534	0.448953	0.478375	0.512013	ra_arco
CHRNA4	ncl	hvc	0.522399	-0.037339	-0.617896	-0.538795	-0.454855	0.260935	0.279539	0.347287	0.398868	ncl_hvc
CHRNA4	hvc	ncl	0.522399	-0.037339	-0.617896	-0.538795	-0.454855	0.260935	0.279539	0.347287	0.398868	hvc_ncl
CHRNA4	stri	lman	0.540963	-0.00644627	-0.506556	-0.480971	-0.361463	0.282257	0.333858	0.379539	0.455497	stri_lman
CHRNA4	ra	nido	0.485743	-0.00426307	-0.511404	-0.471937	-0.405626	0.266854	0.319303	0.36485	0.421571	ra_nido
CHRNA4	x	nido	0.583358	0.00424083	-0.497449	-0.435521	-0.394449	0.322897	0.386524	0.427524	0.48537	x_nido
CHRNA4	stri	nido	0.549706	-0.0434792	-0.529358	-0.457851	-0.395717	0.310489	0.377369	0.442006	0.475208	stri_nido
CHRNA4	nido	x	0.583358	0.00424083	-0.497449	-0.435521	-0.394449	0.322897	0.386524	0.427524	0.48537	nido_x
CHRNA4	stri	x	0.583855	0.00707821	-0.403093	-0.366569	-0.340778	0.375739	0.42405	0.475864	0.497753	stri_x
CHRNA4	ra	stri	0.649469	-0.0182093	-0.484335	-0.410432	-0.344995	0.248477	0.372572	0.444169	0.47689	ra_stri
CHRNA4	lman	stri	0.540963	-0.00644627	-0.506556	-0.480971	-0.361463	0.282257	0.333858	0.379539	0.455497	lman_stri
CHRNA4	nido	stri	0.549706	-0.0434792	-0.529358	-0.457851	-0.395717	0.310489	0.377369	0.442006	0.475208	nido_stri
CHRNA4	x	stri	0.583855	0.00707821	-0.403093	-0.366569	-0.340778	0.375739	0.42405	0.475864	0.497753	x_stri
CHST8	nido	arco	0.489069	0.0093824	-0.623865	-0.543185	-0.449658	0.36505	0.403335	0.471438	0.485358	nido_arco
CHST8	x	arco	-0.658559	-0.011646	-0.527815	-0.499493	-0.434	0.253706	0.430812	0.489678	0.561146	x_arco
CHST8	x	hvc	-0.455968	0.00148647	-0.439957	-0.398468	-0.33478	0.268363	0.359832	0.482365	0.521837	x_hvc
CHST8	arco	nido	0.489069	0.0093824	-0.623865	-0.543185	-0.449658	0.36505	0.403335	0.471438	0.485358	arco_nido
CHST8	arco	x	-0.658559	-0.011646	-0.527815	-0.499493	-0.434	0.253706	0.430812	0.489678	0.561146	arco_x
CHST8	hvc	x	-0.455968	0.00148647	-0.439957	-0.398468	-0.33478	0.268363	0.359832	0.482365	0.521837	hvc_x
CHST9	arco	ra	0.499715	0.0190746	-0.450277	-0.334043	-0.304447	0.294403	0.34291	0.36899	0.397293	arco_ra
CHST9	ra	arco	0.499715	0.0190746	-0.450277	-0.334043	-0.304447	0.294403	0.34291	0.36899	0.397293	ra_arco
CHST9	stri	arco	0.662674	-0.0332855	-0.493633	-0.447175	-0.392751	0.278378	0.344743	0.395647	0.405577	stri_arco
CHST9	ncl	hvc	-0.536957	0.0205963	-0.464196	-0.434075	-0.322076	0.391621	0.445434	0.487053	0.512054	ncl_hvc
CHST9	hvc	ncl	-0.536957	0.0205963	-0.464196	-0.434075	-0.322076	0.391621	0.445434	0.487053	0.512054	hvc_ncl
CHST9	stri	lman	0.602939	-0.0174247	-0.490009	-0.480327	-0.450142	0.267824	0.331664	0.356934	0.378883	stri_lman
CHST9	arco	stri	0.662674	-0.0332855	-0.493633	-0.447175	-0.392751	0.278378	0.344743	0.395647	0.405577	arco_stri
CHST9	lman	stri	0.602939	-0.0174247	-0.490009	-0.480327	-0.450142	0.267824	0.331664	0.356934	0.378883	lman_stri
CHSY3	lman	arco	0.670367	-0.0377052	-0.591468	-0.467887	-0.381319	0.265635	0.363945	0.433445	0.459759	lman_arco
CHSY3	arco	lman	0.670367	-0.0377052	-0.591468	-0.467887	-0.381319	0.265635	0.363945	0.433445	0.459759	arco_lman
CISD3	arco	ra	0.543299	0.0193082	-0.49664	-0.404867	-0.275873	0.337639	0.388345	0.431903	0.465535	arco_ra
CISD3	lman	ra	0.711392	0.00239296	-0.480038	-0.430705	-0.353174	0.257706	0.356138	0.441277	0.51834	lman_ra
CISD3	x	ra	0.579339	0.0203316	-0.489748	-0.482237	-0.465959	0.362663	0.460598	0.505544	0.565611	x_ra
CISD3	ra	arco	0.543299	0.0193082	-0.49664	-0.404867	-0.275873	0.337639	0.388345	0.431903	0.465535	ra_arco
CISD3	hvc	arco	0.665409	-0.00734024	-0.498771	-0.486196	-0.376915	0.317904	0.394175	0.467313	0.499286	hvc_arco
CISD3	ncl	arco	0.705213	-0.0381724	-0.597168	-0.501323	-0.44811	0.297054	0.381515	0.41538	0.459931	ncl_arco
CISD3	lman	arco	0.591931	-0.0294547	-0.577532	-0.491788	-0.438439	0.285347	0.316855	0.390187	0.462809	lman_arco
CISD3	stri	arco	0.56305	-0.0422892	-0.518581	-0.503535	-0.446478	0.258346	0.352368	0.395251	0.411021	stri_arco
CISD3	arco	hvc	0.665409	-0.00734024	-0.498771	-0.486196	-0.376915	0.317904	0.394175	0.467313	0.499286	arco_hvc
CISD3	ncl	hvc	0.813725	-0.0220465	-0.526815	-0.432373	-0.410104	0.289608	0.378628	0.428158	0.528026	ncl_hvc
CISD3	stri	hvc	0.552869	-0.0150769	-0.458212	-0.422966	-0.371061	0.282503	0.312623	0.376816	0.404505	stri_hvc
CISD3	arco	ncl	0.705213	-0.0381724	-0.597168	-0.501323	-0.44811	0.297054	0.381515	0.41538	0.459931	arco_ncl
CISD3	hvc	ncl	0.813725	-0.0220465	-0.526815	-0.432373	-0.410104	0.289608	0.378628	0.428158	0.528026	hvc_ncl
CISD3	ra	lman	0.711392	0.00239296	-0.480038	-0.430705	-0.353174	0.257706	0.356138	0.441277	0.51834	ra_lman
CISD3	arco	lman	0.591931	-0.0294547	-0.577532	-0.491788	-0.438439	0.285347	0.316855	0.390187	0.462809	arco_lman
CISD3	x	lman	0.650265	-0.022783	-0.515554	-0.450554	-0.393333	0.28049	0.391205	0.427126	0.499942	x_lman
CISD3	stri	lman	0.632129	0.0146472	-0.440071	-0.402534	-0.338849	0.294867	0.334567	0.391701	0.435072	stri_lman
CISD3	stri	nido	0.500005	-0.0599402	-0.524643	-0.513733	-0.362488	0.249167	0.331965	0.382467	0.411915	stri_nido
CISD3	ra	x	0.579339	0.0203316	-0.489748	-0.482237	-0.465959	0.362663	0.460598	0.505544	0.565611	ra_x
CISD3	lman	x	0.650265	-0.022783	-0.515554	-0.450554	-0.393333	0.28049	0.391205	0.427126	0.499942	lman_x
CISD3	arco	stri	0.56305	-0.0422892	-0.518581	-0.503535	-0.446478	0.258346	0.352368	0.395251	0.411021	arco_stri
CISD3	hvc	stri	0.552869	-0.0150769	-0.458212	-0.422966	-0.371061	0.282503	0.312623	0.376816	0.404505	hvc_stri
CISD3	lman	stri	0.632129	0.0146472	-0.440071	-0.402534	-0.338849	0.294867	0.334567	0.391701	0.435072	lman_stri
CISD3	nido	stri	0.500005	-0.0599402	-0.524643	-0.513733	-0.362488	0.249167	0.331965	0.382467	0.411915	nido_stri
CKAP2	lman	ra	0.769736	-0.00391643	-0.3829	-0.348486	-0.342534	0.311143	0.404565	0.483418	0.503942	lman_ra
CKAP2	ncl	arco	0.532742	-0.00591807	-0.576063	-0.506242	-0.396341	0.336635	0.396384	0.474606	0.498528	ncl_arco
CKAP2	arco	ncl	0.532742	-0.00591807	-0.576063	-0.506242	-0.396341	0.336635	0.396384	0.474606	0.498528	arco_ncl
CKAP2	ra	lman	0.769736	-0.00391643	-0.3829	-0.348486	-0.342534	0.311143	0.404565	0.483418	0.503942	ra_lman
CLCN6	lman	ra	0.512284	0.00441263	-0.475023	-0.454775	-0.38306	0.350487	0.414328	0.430852	0.504053	lman_ra
CLCN6	nido	ra	0.522863	0.00160389	-0.487298	-0.415873	-0.350739	0.297359	0.409059	0.465521	0.501417	nido_ra
CLCN6	hvc	arco	0.644521	-0.000174913	-0.506457	-0.491362	-0.441394	0.329988	0.387623	0.457456	0.56458	hvc_arco
CLCN6	arco	hvc	0.644521	-0.000174913	-0.506457	-0.491362	-0.441394	0.329988	0.387623	0.457456	0.56458	arco_hvc
CLCN6	nido	hvc	0.520099	0.0268806	-0.459218	-0.410424	-0.304116	0.28634	0.364229	0.473607	0.519399	nido_hvc
CLCN6	lman	ncl	0.47894	-0.028457	-0.532897	-0.462268	-0.434332	0.284056	0.383896	0.410013	0.461002	lman_ncl
CLCN6	ra	lman	0.512284	0.00441263	-0.475023	-0.454775	-0.38306	0.350487	0.414328	0.430852	0.504053	ra_lman
CLCN6	ncl	lman	0.47894	-0.028457	-0.532897	-0.462268	-0.434332	0.284056	0.383896	0.410013	0.461002	ncl_lman
CLCN6	ra	nido	0.522863	0.00160389	-0.487298	-0.415873	-0.350739	0.297359	0.409059	0.465521	0.501417	ra_nido
CLCN6	hvc	nido	0.520099	0.0268806	-0.459218	-0.410424	-0.304116	0.28634	0.364229	0.473607	0.519399	hvc_nido
CLN5	ncl	arco	0.658187	-0.00137291	-0.487638	-0.46879	-0.40701	0.296237	0.437737	0.517295	0.546575	ncl_arco
CLN5	nido	arco	0.667121	-0.0022494	-0.414268	-0.405221	-0.37514	0.335187	0.444939	0.474024	0.521391	nido_arco
CLN5	stri	arco	0.473985	-0.0051078	-0.436742	-0.419794	-0.39122	0.302249	0.410449	0.425994	0.436836	stri_arco
CLN5	arco	ncl	0.658187	-0.00137291	-0.487638	-0.46879	-0.40701	0.296237	0.437737	0.517295	0.546575	arco_ncl
CLN5	arco	nido	0.667121	-0.0022494	-0.414268	-0.405221	-0.37514	0.335187	0.444939	0.474024	0.521391	arco_nido
CLN5	stri	nido	0.615077	-0.0121278	-0.532314	-0.484211	-0.415683	0.286984	0.38548	0.440133	0.454925	stri_nido
CLN5	stri	x	0.601421	-0.00163452	-0.561146	-0.529015	-0.397478	0.280474	0.402494	0.455832	0.51278	stri_x
CLN5	arco	stri	0.473985	-0.0051078	-0.436742	-0.419794	-0.39122	0.302249	0.410449	0.425994	0.436836	arco_stri
CLN5	nido	stri	0.615077	-0.0121278	-0.532314	-0.484211	-0.415683	0.286984	0.38548	0.440133	0.454925	nido_stri
CLN5	x	stri	0.601421	-0.00163452	-0.561146	-0.529015	-0.397478	0.280474	0.402494	0.455832	0.51278	x_stri
CNEP1R1	lman	ra	0.456774	-0.047907	-0.632913	-0.545988	-0.529864	0.204384	0.305999	0.400925	0.422475	lman_ra
CNEP1R1	nido	ra	0.553657	-0.00481936	-0.546128	-0.4825	-0.43099	0.308795	0.369558	0.41008	0.51162	nido_ra
CNEP1R1	ncl	arco	0.538075	0.0265098	-0.480928	-0.445048	-0.365736	0.361645	0.462166	0.485619	0.529294	ncl_arco
CNEP1R1	nido	arco	0.567763	0.0388637	-0.399937	-0.361595	-0.336404	0.341293	0.421625	0.44973	0.543367	nido_arco
CNEP1R1	x	arco	0.587447	0.0106532	-0.403868	-0.376692	-0.348079	0.33452	0.418454	0.511649	0.579751	x_arco
CNEP1R1	arco	ncl	0.538075	0.0265098	-0.480928	-0.445048	-0.365736	0.361645	0.462166	0.485619	0.529294	arco_ncl
CNEP1R1	x	ncl	0.617008	0.0177464	-0.413625	-0.380175	-0.352489	0.298151	0.382357	0.437037	0.459768	x_ncl
CNEP1R1	ra	lman	0.456774	-0.047907	-0.632913	-0.545988	-0.529864	0.204384	0.305999	0.400925	0.422475	ra_lman
CNEP1R1	nido	lman	0.44905	-0.00713065	-0.488133	-0.477138	-0.341369	0.276284	0.338491	0.382832	0.444142	nido_lman
CNEP1R1	ra	nido	0.553657	-0.00481936	-0.546128	-0.4825	-0.43099	0.308795	0.369558	0.41008	0.51162	ra_nido
CNEP1R1	arco	nido	0.567763	0.0388637	-0.399937	-0.361595	-0.336404	0.341293	0.421625	0.44973	0.543367	arco_nido
CNEP1R1	lman	nido	0.44905	-0.00713065	-0.488133	-0.477138	-0.341369	0.276284	0.338491	0.382832	0.444142	lman_nido
CNEP1R1	x	nido	0.612751	0.0172232	-0.53585	-0.502478	-0.426347	0.319151	0.437648	0.496649	0.536577	x_nido
CNEP1R1	arco	x	0.587447	0.0106532	-0.403868	-0.376692	-0.348079	0.33452	0.418454	0.511649	0.579751	arco_x
CNEP1R1	ncl	x	0.617008	0.0177464	-0.413625	-0.380175	-0.352489	0.298151	0.382357	0.437037	0.459768	ncl_x
CNEP1R1	nido	x	0.612751	0.0172232	-0.53585	-0.502478	-0.426347	0.319151	0.437648	0.496649	0.536577	nido_x
CNMD	lman	arco	0.500996	-0.00469729	-0.545661	-0.511866	-0.468308	0.312662	0.409182	0.434801	0.488277	lman_arco
CNMD	arco	lman	0.500996	-0.00469729	-0.545661	-0.511866	-0.468308	0.312662	0.409182	0.434801	0.488277	arco_lman
CNMD	nido	lman	0.530837	-0.0491327	-0.542082	-0.50403	-0.481996	0.291076	0.459409	0.506135	0.52819	nido_lman
CNMD	lman	nido	0.530837	-0.0491327	-0.542082	-0.50403	-0.481996	0.291076	0.459409	0.506135	0.52819	lman_nido
CNN3	arco	ra	0.744866	-0.0490914	-0.486637	-0.442573	-0.43209	0.249197	0.344123	0.418741	0.470138	arco_ra
CNN3	hvc	ra	0.624133	-0.00643185	-0.590699	-0.531475	-0.481945	0.344613	0.40519	0.480184	0.542231	hvc_ra
CNN3	ncl	ra	0.594483	0.0148577	-0.504642	-0.466895	-0.352728	0.358118	0.420759	0.493627	0.559614	ncl_ra
CNN3	lman	ra	0.710568	0.0309519	-0.334188	-0.322182	-0.293324	0.291642	0.42504	0.515954	0.563078	lman_ra
CNN3	ra	arco	0.744866	-0.0490914	-0.486637	-0.442573	-0.43209	0.249197	0.344123	0.418741	0.470138	ra_arco
CNN3	hvc	arco	0.710141	-0.0159623	-0.460752	-0.35822	-0.351388	0.24224	0.345509	0.452664	0.508857	hvc_arco
CNN3	lman	arco	0.794202	0.00282793	-0.420211	-0.398806	-0.364434	0.361277	0.397972	0.451182	0.455737	lman_arco
CNN3	stri	arco	0.554817	-0.0185209	-0.507064	-0.431603	-0.384992	0.276464	0.345393	0.410439	0.445491	stri_arco
CNN3	ra	hvc	0.624133	-0.00643185	-0.590699	-0.531475	-0.481945	0.344613	0.40519	0.480184	0.542231	ra_hvc
CNN3	arco	hvc	0.710141	-0.0159623	-0.460752	-0.35822	-0.351388	0.24224	0.345509	0.452664	0.508857	arco_hvc
CNN3	lman	hvc	0.729811	-0.0515023	-0.595633	-0.538691	-0.43375	0.240991	0.29575	0.369149	0.439259	lman_hvc
CNN3	ra	ncl	0.594483	0.0148577	-0.504642	-0.466895	-0.352728	0.358118	0.420759	0.493627	0.559614	ra_ncl
CNN3	ra	lman	0.710568	0.0309519	-0.334188	-0.322182	-0.293324	0.291642	0.42504	0.515954	0.563078	ra_lman
CNN3	arco	lman	0.794202	0.00282793	-0.420211	-0.398806	-0.364434	0.361277	0.397972	0.451182	0.455737	arco_lman
CNN3	hvc	lman	0.729811	-0.0515023	-0.595633	-0.538691	-0.43375	0.240991	0.29575	0.369149	0.439259	hvc_lman
CNN3	stri	lman	0.630511	0.000475634	-0.467325	-0.438158	-0.369267	0.30902	0.36822	0.412608	0.428714	stri_lman
CNN3	arco	stri	0.554817	-0.0185209	-0.507064	-0.431603	-0.384992	0.276464	0.345393	0.410439	0.445491	arco_stri
CNN3	lman	stri	0.630511	0.000475634	-0.467325	-0.438158	-0.369267	0.30902	0.36822	0.412608	0.428714	lman_stri
CNOT3	arco	ra	0.520125	-0.0282312	-0.483843	-0.446271	-0.388913	0.26504	0.357095	0.414093	0.434478	arco_ra
CNOT3	ncl	ra	0.827219	0.00805718	-0.419118	-0.409127	-0.386435	0.344897	0.462083	0.531214	0.617717	ncl_ra
CNOT3	ra	arco	0.520125	-0.0282312	-0.483843	-0.446271	-0.388913	0.26504	0.357095	0.414093	0.434478	ra_arco
CNOT3	ncl	arco	0.590527	-0.00849565	-0.450697	-0.401179	-0.320093	0.309909	0.355006	0.412267	0.436375	ncl_arco
CNOT3	x	arco	0.692493	0.00301033	-0.471121	-0.465909	-0.337176	0.253493	0.300803	0.418714	0.491831	x_arco
CNOT3	ra	ncl	0.827219	0.00805718	-0.419118	-0.409127	-0.386435	0.344897	0.462083	0.531214	0.617717	ra_ncl
CNOT3	arco	ncl	0.590527	-0.00849565	-0.450697	-0.401179	-0.320093	0.309909	0.355006	0.412267	0.436375	arco_ncl
CNOT3	x	ncl	0.487946	0.0269613	-0.531936	-0.465582	-0.34327	0.306309	0.337417	0.365979	0.462511	x_ncl
CNOT3	stri	lman	0.681066	0.00821273	-0.545948	-0.528798	-0.512585	0.291143	0.394814	0.501006	0.537486	stri_lman
CNOT3	arco	x	0.692493	0.00301033	-0.471121	-0.465909	-0.337176	0.253493	0.300803	0.418714	0.491831	arco_x
CNOT3	ncl	x	0.487946	0.0269613	-0.531936	-0.465582	-0.34327	0.306309	0.337417	0.365979	0.462511	ncl_x
CNOT3	lman	stri	0.681066	0.00821273	-0.545948	-0.528798	-0.512585	0.291143	0.394814	0.501006	0.537486	lman_stri
CNTD1	lman	ra	0.626325	0.00888089	-0.43065	-0.405536	-0.359899	0.340415	0.43427	0.45627	0.482171	lman_ra
CNTD1	hvc	arco	0.595859	-0.0348825	-0.547346	-0.499091	-0.441802	0.282553	0.345527	0.491194	0.497415	hvc_arco
CNTD1	ncl	arco	0.532749	-0.00468342	-0.514936	-0.447323	-0.389676	0.290057	0.393202	0.421971	0.497431	ncl_arco
CNTD1	nido	arco	0.530487	0.00756725	-0.437477	-0.409209	-0.321566	0.289346	0.372784	0.47342	0.478929	nido_arco
CNTD1	arco	hvc	0.595859	-0.0348825	-0.547346	-0.499091	-0.441802	0.282553	0.345527	0.491194	0.497415	arco_hvc
CNTD1	x	hvc	0.567969	0.0208041	-0.512982	-0.382207	-0.332799	0.351628	0.381668	0.430983	0.50838	x_hvc
CNTD1	arco	ncl	0.532749	-0.00468342	-0.514936	-0.447323	-0.389676	0.290057	0.393202	0.421971	0.497431	arco_ncl
CNTD1	nido	ncl	0.492805	0.00446456	-0.512908	-0.440348	-0.414094	0.28388	0.404573	0.419176	0.431796	nido_ncl
CNTD1	ra	lman	0.626325	0.00888089	-0.43065	-0.405536	-0.359899	0.340415	0.43427	0.45627	0.482171	ra_lman
CNTD1	arco	nido	0.530487	0.00756725	-0.437477	-0.409209	-0.321566	0.289346	0.372784	0.47342	0.478929	arco_nido
CNTD1	ncl	nido	0.492805	0.00446456	-0.512908	-0.440348	-0.414094	0.28388	0.404573	0.419176	0.431796	ncl_nido
CNTD1	hvc	x	0.567969	0.0208041	-0.512982	-0.382207	-0.332799	0.351628	0.381668	0.430983	0.50838	hvc_x
CNTFR	arco	ra	0.517292	-0.0100718	-0.50439	-0.49335	-0.383611	0.289766	0.389142	0.428039	0.449156	arco_ra
CNTFR	ra	arco	0.517292	-0.0100718	-0.50439	-0.49335	-0.383611	0.289766	0.389142	0.428039	0.449156	ra_arco
CNTFR	hvc	arco	-0.629267	0.0134353	-0.489981	-0.462797	-0.434207	0.398237	0.455342	0.487006	0.561673	hvc_arco
CNTFR	arco	hvc	-0.629267	0.0134353	-0.489981	-0.462797	-0.434207	0.398237	0.455342	0.487006	0.561673	arco_hvc
CNTLN	ncl	ra	-0.724378	-0.0317885	-0.508742	-0.45097	-0.389886	0.301871	0.394146	0.435445	0.51344	ncl_ra
CNTLN	stri	ra	-0.591609	-0.0026584	-0.541218	-0.506508	-0.418873	0.346117	0.39692	0.447781	0.459143	stri_ra
CNTLN	x	arco	0.54391	-0.0113484	-0.604981	-0.512748	-0.445677	0.357125	0.4135	0.466337	0.495228	x_arco
CNTLN	ra	ncl	-0.724378	-0.0317885	-0.508742	-0.45097	-0.389886	0.301871	0.394146	0.435445	0.51344	ra_ncl
CNTLN	arco	x	0.54391	-0.0113484	-0.604981	-0.512748	-0.445677	0.357125	0.4135	0.466337	0.495228	arco_x
CNTLN	ra	stri	-0.591609	-0.0026584	-0.541218	-0.506508	-0.418873	0.346117	0.39692	0.447781	0.459143	ra_stri
CNTN5	arco	ra	0.82568	-0.020964	-0.619523	-0.556558	-0.46803	0.33912	0.394693	0.448096	0.504861	arco_ra
CNTN5	ra	arco	0.82568	-0.020964	-0.619523	-0.556558	-0.46803	0.33912	0.394693	0.448096	0.504861	ra_arco
CNTRL	arco	ra	0.58287	0.0277362	-0.599383	-0.553479	-0.436614	0.298864	0.397437	0.429772	0.493804	arco_ra
CNTRL	ra	arco	0.58287	0.0277362	-0.599383	-0.553479	-0.436614	0.298864	0.397437	0.429772	0.493804	ra_arco
COCH	x	ra	0.49114	-0.0476232	-0.543196	-0.491926	-0.400647	0.233201	0.308963	0.42211	0.464672	x_ra
COCH	hvc	arco	0.458251	0.00678555	-0.512352	-0.443715	-0.41815	0.309099	0.354188	0.406289	0.439668	hvc_arco
COCH	arco	hvc	0.458251	0.00678555	-0.512352	-0.443715	-0.41815	0.309099	0.354188	0.406289	0.439668	arco_hvc
COCH	ra	x	0.49114	-0.0476232	-0.543196	-0.491926	-0.400647	0.233201	0.308963	0.42211	0.464672	ra_x
COG1	lman	ra	0.458268	0.0151515	-0.447069	-0.416758	-0.347895	0.342511	0.392654	0.430272	0.441751	lman_ra
COG1	ra	lman	0.458268	0.0151515	-0.447069	-0.416758	-0.347895	0.342511	0.392654	0.430272	0.441751	ra_lman
COG1	stri	nido	0.543197	0.00368542	-0.524005	-0.432356	-0.349251	0.299319	0.401855	0.428086	0.492559	stri_nido
COG1	nido	stri	0.543197	0.00368542	-0.524005	-0.432356	-0.349251	0.299319	0.401855	0.428086	0.492559	nido_stri
COL23A1	arco	ra	0.66967	-0.008212	-0.543364	-0.499951	-0.425763	0.302111	0.367617	0.419738	0.497314	arco_ra
COL23A1	ra	arco	0.66967	-0.008212	-0.543364	-0.499951	-0.425763	0.302111	0.367617	0.419738	0.497314	ra_arco
COL23A1	hvc	arco	0.668321	0.0184883	-0.543714	-0.477327	-0.381909	0.350524	0.4351	0.510094	0.568118	hvc_arco
COL23A1	arco	hvc	0.668321	0.0184883	-0.543714	-0.477327	-0.381909	0.350524	0.4351	0.510094	0.568118	arco_hvc
COL6A3	arco	ra	0.376907	-0.01631	-0.409815	-0.38007	-0.307453	0.27612	0.311676	0.32475	0.342105	arco_ra
COL6A3	ra	arco	0.376907	-0.01631	-0.409815	-0.38007	-0.307453	0.27612	0.311676	0.32475	0.342105	ra_arco
COL6A3	nido	ncl	0.570918	-0.0142472	-0.568006	-0.479652	-0.446748	0.32187	0.397436	0.449397	0.486311	nido_ncl
COL6A3	x	lman	0.568126	0.0417209	-0.444183	-0.339996	-0.306525	0.308984	0.341607	0.372691	0.468595	x_lman
COL6A3	ncl	nido	0.570918	-0.0142472	-0.568006	-0.479652	-0.446748	0.32187	0.397436	0.449397	0.486311	ncl_nido
COL6A3	lman	x	0.568126	0.0417209	-0.444183	-0.339996	-0.306525	0.308984	0.341607	0.372691	0.468595	lman_x
COL6A3	stri	x	0.541674	-0.0208995	-0.527345	-0.488004	-0.405995	0.302336	0.370299	0.432361	0.529011	stri_x
COL6A3	x	stri	0.541674	-0.0208995	-0.527345	-0.488004	-0.405995	0.302336	0.370299	0.432361	0.529011	x_stri
COLGALT1	arco	ra	0.410564	-0.0118362	-0.471388	-0.43663	-0.353787	0.272845	0.327712	0.35938	0.39847	arco_ra
COLGALT1	hvc	ra	0.60758	-0.0381888	-0.528997	-0.49001	-0.454583	0.27554	0.346126	0.387498	0.46087	hvc_ra
COLGALT1	stri	ra	0.46206	-0.0210967	-0.521694	-0.505023	-0.418489	0.33153	0.414009	0.431028	0.451889	stri_ra
COLGALT1	ra	arco	0.410564	-0.0118362	-0.471388	-0.43663	-0.353787	0.272845	0.327712	0.35938	0.39847	ra_arco
COLGALT1	nido	arco	0.51569	-0.0248837	-0.55684	-0.524199	-0.509771	0.354764	0.411364	0.445355	0.50924	nido_arco
COLGALT1	ra	hvc	0.60758	-0.0381888	-0.528997	-0.49001	-0.454583	0.27554	0.346126	0.387498	0.46087	ra_hvc
COLGALT1	ncl	hvc	0.5558	-0.00774813	-0.518006	-0.463926	-0.423855	0.283801	0.385466	0.478431	0.515071	ncl_hvc
COLGALT1	stri	hvc	0.51596	-0.00684238	-0.544587	-0.505863	-0.422147	0.32282	0.420314	0.468365	0.505711	stri_hvc
COLGALT1	hvc	ncl	0.5558	-0.00774813	-0.518006	-0.463926	-0.423855	0.283801	0.385466	0.478431	0.515071	hvc_ncl
COLGALT1	nido	lman	0.576649	-0.0101352	-0.498251	-0.438944	-0.370994	0.255015	0.340841	0.399762	0.515822	nido_lman
COLGALT1	stri	lman	0.524294	-0.0257875	-0.553974	-0.47133	-0.448594	0.267341	0.33057	0.412072	0.481661	stri_lman
COLGALT1	arco	nido	0.51569	-0.0248837	-0.55684	-0.524199	-0.509771	0.354764	0.411364	0.445355	0.50924	arco_nido
COLGALT1	lman	nido	0.576649	-0.0101352	-0.498251	-0.438944	-0.370994	0.255015	0.340841	0.399762	0.515822	lman_nido
COLGALT1	stri	nido	0.723375	-0.00686339	-0.501694	-0.470377	-0.402489	0.27312	0.331094	0.402644	0.508655	stri_nido
COLGALT1	ra	stri	0.46206	-0.0210967	-0.521694	-0.505023	-0.418489	0.33153	0.414009	0.431028	0.451889	ra_stri
COLGALT1	hvc	stri	0.51596	-0.00684238	-0.544587	-0.505863	-0.422147	0.32282	0.420314	0.468365	0.505711	hvc_stri
COLGALT1	lman	stri	0.524294	-0.0257875	-0.553974	-0.47133	-0.448594	0.267341	0.33057	0.412072	0.481661	lman_stri
COLGALT1	nido	stri	0.723375	-0.00686339	-0.501694	-0.470377	-0.402489	0.27312	0.331094	0.402644	0.508655	nido_stri
COMTD1	stri	ra	0.629204	-0.00739252	-0.471837	-0.441528	-0.415755	0.379246	0.433279	0.512824	0.546447	stri_ra
COMTD1	hvc	arco	0.569962	0.0080896	-0.528602	-0.399995	-0.366202	0.271148	0.342156	0.396791	0.414163	hvc_arco
COMTD1	arco	hvc	0.569962	0.0080896	-0.528602	-0.399995	-0.366202	0.271148	0.342156	0.396791	0.414163	arco_hvc
COMTD1	ra	stri	0.629204	-0.00739252	-0.471837	-0.441528	-0.415755	0.379246	0.433279	0.512824	0.546447	ra_stri
COPS7A	arco	ra	0.643203	0.00446352	-0.508445	-0.481592	-0.445459	0.333596	0.411449	0.466429	0.516295	arco_ra
COPS7A	hvc	ra	0.449243	-0.0126622	-0.534159	-0.469322	-0.436081	0.266728	0.326822	0.383773	0.441032	hvc_ra
COPS7A	lman	ra	0.634639	-0.00780898	-0.539528	-0.494213	-0.39791	0.322219	0.406675	0.422399	0.434102	lman_ra
COPS7A	nido	ra	0.680612	-0.00728223	-0.631506	-0.498159	-0.355974	0.312849	0.393847	0.430221	0.498705	nido_ra
COPS7A	ra	arco	0.643203	0.00446352	-0.508445	-0.481592	-0.445459	0.333596	0.411449	0.466429	0.516295	ra_arco
COPS7A	lman	arco	0.52628	0.0142403	-0.440385	-0.405249	-0.347646	0.281335	0.391643	0.405979	0.419944	lman_arco
COPS7A	nido	arco	0.756725	-0.0295768	-0.561022	-0.465269	-0.444717	0.279944	0.363631	0.403589	0.418807	nido_arco
COPS7A	ra	hvc	0.449243	-0.0126622	-0.534159	-0.469322	-0.436081	0.266728	0.326822	0.383773	0.441032	ra_hvc
COPS7A	ncl	hvc	0.769781	0.0364119	-0.502612	-0.424198	-0.382013	0.306754	0.422473	0.526785	0.563524	ncl_hvc
COPS7A	lman	hvc	0.754975	-0.0359975	-0.583537	-0.548279	-0.477635	0.27432	0.348079	0.4094	0.453053	lman_hvc
COPS7A	nido	hvc	0.453964	-0.0338988	-0.526719	-0.410451	-0.383104	0.237769	0.331348	0.384738	0.412018	nido_hvc
COPS7A	hvc	ncl	0.769781	0.0364119	-0.502612	-0.424198	-0.382013	0.306754	0.422473	0.526785	0.563524	hvc_ncl
COPS7A	lman	ncl	0.560567	-0.00648673	-0.439575	-0.393655	-0.378887	0.261821	0.316281	0.364931	0.502457	lman_ncl
COPS7A	ra	lman	0.634639	-0.00780898	-0.539528	-0.494213	-0.39791	0.322219	0.406675	0.422399	0.434102	ra_lman
COPS7A	arco	lman	0.52628	0.0142403	-0.440385	-0.405249	-0.347646	0.281335	0.391643	0.405979	0.419944	arco_lman
COPS7A	hvc	lman	0.754975	-0.0359975	-0.583537	-0.548279	-0.477635	0.27432	0.348079	0.4094	0.453053	hvc_lman
COPS7A	ncl	lman	0.560567	-0.00648673	-0.439575	-0.393655	-0.378887	0.261821	0.316281	0.364931	0.502457	ncl_lman
COPS7A	nido	lman	0.66811	0.0076203	-0.378227	-0.371592	-0.341376	0.261549	0.427595	0.461474	0.482928	nido_lman
COPS7A	stri	lman	0.562847	-0.0600259	-0.52484	-0.475663	-0.422264	0.312851	0.366855	0.427462	0.440991	stri_lman
COPS7A	ra	nido	0.680612	-0.00728223	-0.631506	-0.498159	-0.355974	0.312849	0.393847	0.430221	0.498705	ra_nido
COPS7A	arco	nido	0.756725	-0.0295768	-0.561022	-0.465269	-0.444717	0.279944	0.363631	0.403589	0.418807	arco_nido
COPS7A	hvc	nido	0.453964	-0.0338988	-0.526719	-0.410451	-0.383104	0.237769	0.331348	0.384738	0.412018	hvc_nido
COPS7A	lman	nido	0.66811	0.0076203	-0.378227	-0.371592	-0.341376	0.261549	0.427595	0.461474	0.482928	lman_nido
COPS7A	stri	nido	0.573939	0.0203585	-0.608174	-0.457809	-0.366859	0.337176	0.407541	0.494173	0.533852	stri_nido
COPS7A	stri	x	0.792473	-0.00537683	-0.485693	-0.434556	-0.399816	0.279882	0.374975	0.441159	0.49427	stri_x
COPS7A	lman	stri	0.562847	-0.0600259	-0.52484	-0.475663	-0.422264	0.312851	0.366855	0.427462	0.440991	lman_stri
COPS7A	nido	stri	0.573939	0.0203585	-0.608174	-0.457809	-0.366859	0.337176	0.407541	0.494173	0.533852	nido_stri
COPS7A	x	stri	0.792473	-0.00537683	-0.485693	-0.434556	-0.399816	0.279882	0.374975	0.441159	0.49427	x_stri
COQ10B	hvc	arco	0.625308	0.00125816	-0.493801	-0.41853	-0.38866	0.314393	0.446679	0.541639	0.562678	hvc_arco
COQ10B	x	arco	0.59642	0.0203362	-0.477112	-0.425491	-0.356607	0.26357	0.344914	0.435829	0.492965	x_arco
COQ10B	arco	hvc	0.625308	0.00125816	-0.493801	-0.41853	-0.38866	0.314393	0.446679	0.541639	0.562678	arco_hvc
COQ10B	arco	x	0.59642	0.0203362	-0.477112	-0.425491	-0.356607	0.26357	0.344914	0.435829	0.492965	arco_x
COQ10B	stri	x	0.673265	-0.0284746	-0.560404	-0.487066	-0.451056	0.271974	0.416132	0.50246	0.530818	stri_x
COQ10B	x	stri	0.673265	-0.0284746	-0.560404	-0.487066	-0.451056	0.271974	0.416132	0.50246	0.530818	x_stri
COQ5	stri	ncl	0.421633	0.0170534	-0.496672	-0.451096	-0.37548	0.283677	0.328771	0.35053	0.366024	stri_ncl
COQ5	ncl	stri	0.421633	0.0170534	-0.496672	-0.451096	-0.37548	0.283677	0.328771	0.35053	0.366024	ncl_stri
COQ6	lman	ncl	0.470776	0.00065482	-0.53996	-0.460644	-0.428439	0.292044	0.324457	0.407002	0.441906	lman_ncl
COQ6	ncl	lman	0.470776	0.00065482	-0.53996	-0.460644	-0.428439	0.292044	0.324457	0.407002	0.441906	ncl_lman
CORT	arco	ra	0.643125	-0.0142897	-0.44661	-0.411105	-0.378497	0.287428	0.397834	0.43452	0.488416	arco_ra
CORT	ncl	ra	0.764203	0.029815	-0.421883	-0.400653	-0.350977	0.306401	0.401029	0.480662	0.548845	ncl_ra
CORT	lman	ra	0.53258	-6.72555e-05	-0.483665	-0.430843	-0.398056	0.293916	0.351963	0.414978	0.430508	lman_ra
CORT	nido	ra	0.463085	-0.0495592	-0.6133	-0.467573	-0.384751	0.256607	0.31183	0.390612	0.456323	nido_ra
CORT	ra	arco	0.643125	-0.0142897	-0.44661	-0.411105	-0.378497	0.287428	0.397834	0.43452	0.488416	ra_arco
CORT	hvc	arco	0.718953	0.0248974	-0.492125	-0.44136	-0.414951	0.355884	0.428321	0.477547	0.553192	hvc_arco
CORT	ncl	arco	0.594955	-0.00748591	-0.363059	-0.348577	-0.312272	0.243808	0.314251	0.382132	0.515297	ncl_arco
CORT	nido	arco	0.510577	-0.0231633	-0.552188	-0.483079	-0.464927	0.333614	0.406012	0.424282	0.44144	nido_arco
CORT	arco	hvc	0.718953	0.0248974	-0.492125	-0.44136	-0.414951	0.355884	0.428321	0.477547	0.553192	arco_hvc
CORT	ra	ncl	0.764203	0.029815	-0.421883	-0.400653	-0.350977	0.306401	0.401029	0.480662	0.548845	ra_ncl
CORT	arco	ncl	0.594955	-0.00748591	-0.363059	-0.348577	-0.312272	0.243808	0.314251	0.382132	0.515297	arco_ncl
CORT	ra	lman	0.53258	-6.72555e-05	-0.483665	-0.430843	-0.398056	0.293916	0.351963	0.414978	0.430508	ra_lman
CORT	nido	lman	0.698661	-0.0293636	-0.539114	-0.470219	-0.413581	0.293827	0.422668	0.45967	0.550421	nido_lman
CORT	ra	nido	0.463085	-0.0495592	-0.6133	-0.467573	-0.384751	0.256607	0.31183	0.390612	0.456323	ra_nido
CORT	arco	nido	0.510577	-0.0231633	-0.552188	-0.483079	-0.464927	0.333614	0.406012	0.424282	0.44144	arco_nido
CORT	lman	nido	0.698661	-0.0293636	-0.539114	-0.470219	-0.413581	0.293827	0.422668	0.45967	0.550421	lman_nido
CORT	stri	x	0.797184	-0.008325	-0.523767	-0.464708	-0.416985	0.29492	0.45919	0.509384	0.524869	stri_x
CORT	x	stri	0.797184	-0.008325	-0.523767	-0.464708	-0.416985	0.29492	0.45919	0.509384	0.524869	x_stri
COX11	hvc	arco	0.54653	-0.0434644	-0.43605	-0.430597	-0.398	0.311439	0.386252	0.437935	0.495482	hvc_arco
COX11	arco	hvc	0.54653	-0.0434644	-0.43605	-0.430597	-0.398	0.311439	0.386252	0.437935	0.495482	arco_hvc
CPEB2	x	ra	0.501366	-0.00364865	-0.408919	-0.395437	-0.381702	0.286914	0.338016	0.373824	0.475519	x_ra
CPEB2	x	arco	0.475449	-0.0223756	-0.558527	-0.477531	-0.395128	0.236	0.346847	0.380824	0.450611	x_arco
CPEB2	stri	hvc	0.525507	0.0166318	-0.428793	-0.418324	-0.373588	0.318956	0.348458	0.400715	0.422365	stri_hvc
CPEB2	ra	x	0.501366	-0.00364865	-0.408919	-0.395437	-0.381702	0.286914	0.338016	0.373824	0.475519	ra_x
CPEB2	arco	x	0.475449	-0.0223756	-0.558527	-0.477531	-0.395128	0.236	0.346847	0.380824	0.450611	arco_x
CPEB2	hvc	stri	0.525507	0.0166318	-0.428793	-0.418324	-0.373588	0.318956	0.348458	0.400715	0.422365	hvc_stri
CPLX3	hvc	ra	0.581236	-0.0561915	-0.506484	-0.46882	-0.41368	0.245742	0.296628	0.380119	0.401206	hvc_ra
CPLX3	ncl	arco	0.509208	-0.0146886	-0.462447	-0.408095	-0.360131	0.28572	0.387868	0.452316	0.474749	ncl_arco
CPLX3	lman	arco	0.547932	0.023057	-0.469464	-0.42965	-0.356991	0.301245	0.400294	0.479043	0.482938	lman_arco
CPLX3	ra	hvc	0.581236	-0.0561915	-0.506484	-0.46882	-0.41368	0.245742	0.296628	0.380119	0.401206	ra_hvc
CPLX3	arco	ncl	0.509208	-0.0146886	-0.462447	-0.408095	-0.360131	0.28572	0.387868	0.452316	0.474749	arco_ncl
CPLX3	arco	lman	0.547932	0.023057	-0.469464	-0.42965	-0.356991	0.301245	0.400294	0.479043	0.482938	arco_lman
CPNE7	lman	arco	0.552744	-0.00379248	-0.524014	-0.466809	-0.378803	0.291614	0.376733	0.434809	0.455354	lman_arco
CPNE7	ncl	hvc	0.51425	0.00171765	-0.57647	-0.364045	-0.3494	0.348874	0.410211	0.433629	0.479513	ncl_hvc
CPNE7	stri	hvc	0.530406	0.0121827	-0.611347	-0.511935	-0.413998	0.278769	0.418805	0.495727	0.523457	stri_hvc
CPNE7	hvc	ncl	0.51425	0.00171765	-0.57647	-0.364045	-0.3494	0.348874	0.410211	0.433629	0.479513	hvc_ncl
CPNE7	arco	lman	0.552744	-0.00379248	-0.524014	-0.466809	-0.378803	0.291614	0.376733	0.434809	0.455354	arco_lman
CPNE7	stri	x	0.673434	0.000720219	-0.481982	-0.458414	-0.409309	0.339895	0.443324	0.462533	0.521839	stri_x
CPNE7	hvc	stri	0.530406	0.0121827	-0.611347	-0.511935	-0.413998	0.278769	0.418805	0.495727	0.523457	hvc_stri
CPNE7	x	stri	0.673434	0.000720219	-0.481982	-0.458414	-0.409309	0.339895	0.443324	0.462533	0.521839	x_stri
CPSF7	x	arco	-0.401184	0.00945567	-0.376327	-0.371938	-0.34497	0.361175	0.463322	0.54345	0.578834	x_arco
CPSF7	arco	x	-0.401184	0.00945567	-0.376327	-0.371938	-0.34497	0.361175	0.463322	0.54345	0.578834	arco_x
CRABP1	hvc	arco	0.562337	-0.0258774	-0.517405	-0.407362	-0.375143	0.294269	0.413454	0.45618	0.487452	hvc_arco
CRABP1	arco	hvc	0.562337	-0.0258774	-0.517405	-0.407362	-0.375143	0.294269	0.413454	0.45618	0.487452	arco_hvc
CRCP	arco	ra	0.694309	-0.00759076	-0.443588	-0.420796	-0.395428	0.253895	0.346607	0.402135	0.445936	arco_ra
CRCP	hvc	ra	0.649289	-0.0457202	-0.524973	-0.460353	-0.433197	0.259784	0.359171	0.402546	0.424382	hvc_ra
CRCP	ncl	ra	0.535301	-0.0199776	-0.564131	-0.500682	-0.480522	0.272874	0.354553	0.381338	0.47124	ncl_ra
CRCP	lman	ra	0.727137	-0.00260704	-0.368707	-0.348823	-0.323276	0.324081	0.41485	0.520821	0.588464	lman_ra
CRCP	x	ra	0.581687	0.0194246	-0.422441	-0.372186	-0.317359	0.424387	0.492248	0.555126	0.569961	x_ra
CRCP	stri	ra	0.51786	0.00090356	-0.487275	-0.452283	-0.395421	0.349384	0.404333	0.443199	0.481964	stri_ra
CRCP	ra	arco	0.694309	-0.00759076	-0.443588	-0.420796	-0.395428	0.253895	0.346607	0.402135	0.445936	ra_arco
CRCP	hvc	arco	0.605477	-0.0132984	-0.551709	-0.518078	-0.469946	0.247879	0.37871	0.498526	0.540408	hvc_arco
CRCP	ncl	arco	0.48511	-0.0379718	-0.670359	-0.565088	-0.478919	0.286123	0.34958	0.391144	0.437966	ncl_arco
CRCP	lman	arco	0.589268	-0.0110242	-0.564622	-0.508019	-0.387626	0.306597	0.350684	0.434531	0.457376	lman_arco
CRCP	ra	hvc	0.649289	-0.0457202	-0.524973	-0.460353	-0.433197	0.259784	0.359171	0.402546	0.424382	ra_hvc
CRCP	arco	hvc	0.605477	-0.0132984	-0.551709	-0.518078	-0.469946	0.247879	0.37871	0.498526	0.540408	arco_hvc
CRCP	lman	hvc	0.569765	-0.0517173	-0.648998	-0.539416	-0.460875	0.240195	0.368855	0.424214	0.526458	lman_hvc
CRCP	nido	hvc	0.409557	-0.0388123	-0.463065	-0.458862	-0.415921	0.21454	0.359666	0.378386	0.391702	nido_hvc
CRCP	ra	ncl	0.535301	-0.0199776	-0.564131	-0.500682	-0.480522	0.272874	0.354553	0.381338	0.47124	ra_ncl
CRCP	arco	ncl	0.48511	-0.0379718	-0.670359	-0.565088	-0.478919	0.286123	0.34958	0.391144	0.437966	arco_ncl
CRCP	x	ncl	0.450431	0.024943	-0.6467	-0.469308	-0.402761	0.258506	0.342669	0.388083	0.425673	x_ncl
CRCP	ra	lman	0.727137	-0.00260704	-0.368707	-0.348823	-0.323276	0.324081	0.41485	0.520821	0.588464	ra_lman
CRCP	arco	lman	0.589268	-0.0110242	-0.564622	-0.508019	-0.387626	0.306597	0.350684	0.434531	0.457376	arco_lman
CRCP	hvc	lman	0.569765	-0.0517173	-0.648998	-0.539416	-0.460875	0.240195	0.368855	0.424214	0.526458	hvc_lman
CRCP	hvc	nido	0.409557	-0.0388123	-0.463065	-0.458862	-0.415921	0.21454	0.359666	0.378386	0.391702	hvc_nido
CRCP	ra	x	0.581687	0.0194246	-0.422441	-0.372186	-0.317359	0.424387	0.492248	0.555126	0.569961	ra_x
CRCP	ncl	x	0.450431	0.024943	-0.6467	-0.469308	-0.402761	0.258506	0.342669	0.388083	0.425673	ncl_x
CRCP	stri	x	0.49776	-0.00368486	-0.432835	-0.353408	-0.338227	0.331882	0.405749	0.435198	0.440926	stri_x
CRCP	ra	stri	0.51786	0.00090356	-0.487275	-0.452283	-0.395421	0.349384	0.404333	0.443199	0.481964	ra_stri
CRCP	x	stri	0.49776	-0.00368486	-0.432835	-0.353408	-0.338227	0.331882	0.405749	0.435198	0.440926	x_stri
CREB5	hvc	ra	0.561338	-0.00186015	-0.487106	-0.437316	-0.422286	0.332698	0.385022	0.427241	0.453783	hvc_ra
CREB5	ra	hvc	0.561338	-0.00186015	-0.487106	-0.437316	-0.422286	0.332698	0.385022	0.427241	0.453783	ra_hvc
CREB5	nido	hvc	0.475051	-0.020357	-0.421686	-0.389124	-0.365036	0.313458	0.373169	0.406176	0.426787	nido_hvc
CREB5	x	hvc	0.504914	-0.0110541	-0.556553	-0.452871	-0.399105	0.258501	0.321811	0.424383	0.437476	x_hvc
CREB5	nido	lman	0.593548	0.0330023	-0.447177	-0.406218	-0.337299	0.295642	0.389864	0.444724	0.453192	nido_lman
CREB5	hvc	nido	0.475051	-0.020357	-0.421686	-0.389124	-0.365036	0.313458	0.373169	0.406176	0.426787	hvc_nido
CREB5	lman	nido	0.593548	0.0330023	-0.447177	-0.406218	-0.337299	0.295642	0.389864	0.444724	0.453192	lman_nido
CREB5	hvc	x	0.504914	-0.0110541	-0.556553	-0.452871	-0.399105	0.258501	0.321811	0.424383	0.437476	hvc_x
CREM	lman	ra	0.642859	-0.0416361	-0.568925	-0.510599	-0.467525	0.240444	0.309989	0.408017	0.441992	lman_ra
CREM	x	ra	0.661674	0.0193185	-0.404829	-0.355528	-0.329662	0.358657	0.452378	0.476473	0.50208	x_ra
CREM	stri	ra	0.579219	0.0110088	-0.517857	-0.444675	-0.369104	0.365007	0.449956	0.481398	0.508611	stri_ra
CREM	ncl	arco	0.59911	-0.0165641	-0.446859	-0.410663	-0.381403	0.265096	0.422853	0.47093	0.547888	ncl_arco
CREM	nido	arco	0.646731	0.00896043	-0.594301	-0.575959	-0.376083	0.314057	0.401324	0.459811	0.507074	nido_arco
CREM	lman	hvc	0.810148	-0.00428529	-0.514342	-0.41694	-0.338329	0.298666	0.319784	0.367182	0.473972	lman_hvc
CREM	x	hvc	0.580022	0.0242244	-0.427965	-0.405095	-0.330309	0.292907	0.412576	0.434899	0.503683	x_hvc
CREM	arco	ncl	0.59911	-0.0165641	-0.446859	-0.410663	-0.381403	0.265096	0.422853	0.47093	0.547888	arco_ncl
CREM	ra	lman	0.642859	-0.0416361	-0.568925	-0.510599	-0.467525	0.240444	0.309989	0.408017	0.441992	ra_lman
CREM	hvc	lman	0.810148	-0.00428529	-0.514342	-0.41694	-0.338329	0.298666	0.319784	0.367182	0.473972	hvc_lman
CREM	x	lman	0.596046	-0.013204	-0.441407	-0.431691	-0.395803	0.294494	0.328118	0.356487	0.409903	x_lman
CREM	arco	nido	0.646731	0.00896043	-0.594301	-0.575959	-0.376083	0.314057	0.401324	0.459811	0.507074	arco_nido
CREM	ra	x	0.661674	0.0193185	-0.404829	-0.355528	-0.329662	0.358657	0.452378	0.476473	0.50208	ra_x
CREM	hvc	x	0.580022	0.0242244	-0.427965	-0.405095	-0.330309	0.292907	0.412576	0.434899	0.503683	hvc_x
CREM	lman	x	0.596046	-0.013204	-0.441407	-0.431691	-0.395803	0.294494	0.328118	0.356487	0.409903	lman_x
CREM	ra	stri	0.579219	0.0110088	-0.517857	-0.444675	-0.369104	0.365007	0.449956	0.481398	0.508611	ra_stri
CRH	ncl	ra	0.545288	-0.0423608	-0.457196	-0.430342	-0.374542	0.300115	0.365613	0.404625	0.42558	ncl_ra
CRH	stri	ra	0.520784	0.000619586	-0.452229	-0.387732	-0.332786	0.29398	0.350136	0.404415	0.435927	stri_ra
CRH	ncl	hvc	0.508215	0.00286199	-0.512949	-0.451024	-0.362191	0.283032	0.369159	0.425527	0.433374	ncl_hvc
CRH	lman	hvc	0.619944	-0.0539527	-0.517693	-0.463631	-0.415148	0.238369	0.295078	0.327867	0.426385	lman_hvc
CRH	ra	ncl	0.545288	-0.0423608	-0.457196	-0.430342	-0.374542	0.300115	0.365613	0.404625	0.42558	ra_ncl
CRH	hvc	ncl	0.508215	0.00286199	-0.512949	-0.451024	-0.362191	0.283032	0.369159	0.425527	0.433374	hvc_ncl
CRH	x	ncl	0.755124	-0.0694148	-0.520275	-0.477117	-0.385675	0.220193	0.325243	0.337025	0.458932	x_ncl
CRH	stri	ncl	0.512341	-0.00103005	-0.538351	-0.436477	-0.399539	0.337601	0.400349	0.456115	0.493981	stri_ncl
CRH	hvc	lman	0.619944	-0.0539527	-0.517693	-0.463631	-0.415148	0.238369	0.295078	0.327867	0.426385	hvc_lman
CRH	ncl	x	0.755124	-0.0694148	-0.520275	-0.477117	-0.385675	0.220193	0.325243	0.337025	0.458932	ncl_x
CRH	ra	stri	0.520784	0.000619586	-0.452229	-0.387732	-0.332786	0.29398	0.350136	0.404415	0.435927	ra_stri
CRH	ncl	stri	0.512341	-0.00103005	-0.538351	-0.436477	-0.399539	0.337601	0.400349	0.456115	0.493981	ncl_stri
CRHBP	hvc	ra	0.610778	-0.00799474	-0.541546	-0.518596	-0.424122	0.341302	0.441452	0.469141	0.500446	hvc_ra
CRHBP	lman	ra	0.70351	-0.00503262	-0.448585	-0.415431	-0.32254	0.302129	0.389413	0.420041	0.451194	lman_ra
CRHBP	stri	ra	0.502843	-0.007612	-0.536769	-0.480929	-0.4177	0.357494	0.395731	0.472232	0.489847	stri_ra
CRHBP	stri	arco	0.581699	-0.00661491	-0.526218	-0.461206	-0.393618	0.277158	0.305259	0.374011	0.445875	stri_arco
CRHBP	ra	hvc	0.610778	-0.00799474	-0.541546	-0.518596	-0.424122	0.341302	0.441452	0.469141	0.500446	ra_hvc
CRHBP	lman	hvc	0.434782	0.0258443	-0.423908	-0.375002	-0.340308	0.347246	0.388503	0.411179	0.427926	lman_hvc
CRHBP	ra	lman	0.70351	-0.00503262	-0.448585	-0.415431	-0.32254	0.302129	0.389413	0.420041	0.451194	ra_lman
CRHBP	hvc	lman	0.434782	0.0258443	-0.423908	-0.375002	-0.340308	0.347246	0.388503	0.411179	0.427926	hvc_lman
CRHBP	stri	x	0.567961	-0.028005	-0.611846	-0.5571	-0.41678	0.334504	0.478725	0.492811	0.528444	stri_x
CRHBP	ra	stri	0.502843	-0.007612	-0.536769	-0.480929	-0.4177	0.357494	0.395731	0.472232	0.489847	ra_stri
CRHBP	arco	stri	0.581699	-0.00661491	-0.526218	-0.461206	-0.393618	0.277158	0.305259	0.374011	0.445875	arco_stri
CRHBP	x	stri	0.567961	-0.028005	-0.611846	-0.5571	-0.41678	0.334504	0.478725	0.492811	0.528444	x_stri
CRHR2	hvc	ra	-0.50414	0.00276152	-0.462664	-0.4212	-0.378537	0.271354	0.394909	0.464426	0.519407	hvc_ra
CRHR2	ra	hvc	-0.50414	0.00276152	-0.462664	-0.4212	-0.378537	0.271354	0.394909	0.464426	0.519407	ra_hvc
CRHR2	x	ncl	0.575533	-0.0211182	-0.548044	-0.479878	-0.375173	0.261696	0.345179	0.380256	0.499185	x_ncl
CRHR2	stri	ncl	0.64708	-0.0325199	-0.51919	-0.494231	-0.454423	0.284047	0.366207	0.449208	0.568107	stri_ncl
CRHR2	nido	lman	0.739867	-0.00916018	-0.48138	-0.43279	-0.406519	0.211649	0.394525	0.431098	0.553759	nido_lman
CRHR2	lman	nido	0.739867	-0.00916018	-0.48138	-0.43279	-0.406519	0.211649	0.394525	0.431098	0.553759	lman_nido
CRHR2	stri	nido	0.481443	-0.0099804	-0.46021	-0.447324	-0.427612	0.281079	0.321319	0.406796	0.452403	stri_nido
CRHR2	ncl	x	0.575533	-0.0211182	-0.548044	-0.479878	-0.375173	0.261696	0.345179	0.380256	0.499185	ncl_x
CRHR2	stri	x	0.628606	0.0709689	-0.354922	-0.307331	-0.250894	0.375931	0.431285	0.50946	0.566269	stri_x
CRHR2	ncl	stri	0.64708	-0.0325199	-0.51919	-0.494231	-0.454423	0.284047	0.366207	0.449208	0.568107	ncl_stri
CRHR2	nido	stri	0.481443	-0.0099804	-0.46021	-0.447324	-0.427612	0.281079	0.321319	0.406796	0.452403	nido_stri
CRHR2	x	stri	0.628606	0.0709689	-0.354922	-0.307331	-0.250894	0.375931	0.431285	0.50946	0.566269	x_stri
CRIP1	hvc	ra	0.744623	0.0252945	-0.477501	-0.380021	-0.338568	0.326488	0.433459	0.468682	0.505759	hvc_ra
CRIP1	ncl	ra	0.645902	0.057537	-0.39093	-0.366728	-0.292767	0.362385	0.397702	0.451151	0.539156	ncl_ra
CRIP1	nido	ra	0.641701	-0.0152355	-0.534748	-0.503013	-0.409589	0.257647	0.342623	0.351368	0.417831	nido_ra
CRIP1	ra	hvc	0.744623	0.0252945	-0.477501	-0.380021	-0.338568	0.326488	0.433459	0.468682	0.505759	ra_hvc
CRIP1	ra	ncl	0.645902	0.057537	-0.39093	-0.366728	-0.292767	0.362385	0.397702	0.451151	0.539156	ra_ncl
CRIP1	nido	ncl	0.699956	0.0472998	-0.39968	-0.329919	-0.293873	0.345123	0.432198	0.485239	0.517686	nido_ncl
CRIP1	ra	nido	0.641701	-0.0152355	-0.534748	-0.503013	-0.409589	0.257647	0.342623	0.351368	0.417831	ra_nido
CRIP1	ncl	nido	0.699956	0.0472998	-0.39968	-0.329919	-0.293873	0.345123	0.432198	0.485239	0.517686	ncl_nido
CROT	x	ra	0.522272	-0.0156539	-0.525542	-0.492397	-0.401948	0.303825	0.41348	0.449926	0.494565	x_ra
CROT	nido	ncl	-0.620256	0.00719711	-0.44637	-0.422207	-0.38078	0.369602	0.405621	0.460637	0.469267	nido_ncl
CROT	ncl	nido	-0.620256	0.00719711	-0.44637	-0.422207	-0.38078	0.369602	0.405621	0.460637	0.469267	ncl_nido
CROT	ra	x	0.522272	-0.0156539	-0.525542	-0.492397	-0.401948	0.303825	0.41348	0.449926	0.494565	ra_x
CRYL1	nido	arco	0.553965	-0.0453551	-0.615161	-0.53346	-0.441043	0.281657	0.335951	0.394794	0.409914	nido_arco
CRYL1	lman	ncl	0.514006	0.0375934	-0.532888	-0.421763	-0.3369	0.341729	0.472551	0.505176	0.512029	lman_ncl
CRYL1	ncl	lman	0.514006	0.0375934	-0.532888	-0.421763	-0.3369	0.341729	0.472551	0.505176	0.512029	ncl_lman
CRYL1	arco	nido	0.553965	-0.0453551	-0.615161	-0.53346	-0.441043	0.281657	0.335951	0.394794	0.409914	arco_nido
CSRP1	arco	ra	0.401064	0.0106167	-0.616172	-0.52181	-0.406499	0.242467	0.301183	0.32543	0.335971	arco_ra
CSRP1	hvc	ra	0.511652	0.0281493	-0.459905	-0.453432	-0.414604	0.334317	0.403141	0.427314	0.451785	hvc_ra
CSRP1	x	ra	0.63724	-0.00836592	-0.481754	-0.407045	-0.379215	0.290329	0.32479	0.365655	0.418235	x_ra
CSRP1	stri	ra	0.577039	-0.00561887	-0.499002	-0.471186	-0.425058	0.326901	0.388968	0.510535	0.553142	stri_ra
CSRP1	ra	arco	0.401064	0.0106167	-0.616172	-0.52181	-0.406499	0.242467	0.301183	0.32543	0.335971	ra_arco
CSRP1	hvc	arco	0.514496	0.0255095	-0.408219	-0.376489	-0.370906	0.313934	0.417715	0.441556	0.45219	hvc_arco
CSRP1	lman	arco	0.512239	-0.0110413	-0.498641	-0.452058	-0.370651	0.361717	0.414058	0.47152	0.49661	lman_arco
CSRP1	stri	arco	0.497284	-0.0264469	-0.531075	-0.507115	-0.469402	0.348982	0.397513	0.444035	0.460125	stri_arco
CSRP1	ra	hvc	0.511652	0.0281493	-0.459905	-0.453432	-0.414604	0.334317	0.403141	0.427314	0.451785	ra_hvc
CSRP1	arco	hvc	0.514496	0.0255095	-0.408219	-0.376489	-0.370906	0.313934	0.417715	0.441556	0.45219	arco_hvc
CSRP1	lman	hvc	0.660744	-0.00940855	-0.480692	-0.458281	-0.398902	0.391606	0.417877	0.520932	0.628542	lman_hvc
CSRP1	stri	hvc	0.489503	0.0264333	-0.473156	-0.406505	-0.365847	0.342272	0.393988	0.439302	0.460137	stri_hvc
CSRP1	arco	lman	0.512239	-0.0110413	-0.498641	-0.452058	-0.370651	0.361717	0.414058	0.47152	0.49661	arco_lman
CSRP1	hvc	lman	0.660744	-0.00940855	-0.480692	-0.458281	-0.398902	0.391606	0.417877	0.520932	0.628542	hvc_lman
CSRP1	nido	lman	0.638411	0.00129183	-0.392976	-0.337	-0.325754	0.293958	0.369132	0.387566	0.444186	nido_lman
CSRP1	stri	lman	0.576052	-0.00799012	-0.447274	-0.423912	-0.365891	0.327102	0.396157	0.431452	0.458854	stri_lman
CSRP1	lman	nido	0.638411	0.00129183	-0.392976	-0.337	-0.325754	0.293958	0.369132	0.387566	0.444186	lman_nido
CSRP1	stri	nido	0.669952	0.0149875	-0.538026	-0.497807	-0.369237	0.313222	0.366843	0.542097	0.577366	stri_nido
CSRP1	ra	x	0.63724	-0.00836592	-0.481754	-0.407045	-0.379215	0.290329	0.32479	0.365655	0.418235	ra_x
CSRP1	ra	stri	0.577039	-0.00561887	-0.499002	-0.471186	-0.425058	0.326901	0.388968	0.510535	0.553142	ra_stri
CSRP1	arco	stri	0.497284	-0.0264469	-0.531075	-0.507115	-0.469402	0.348982	0.397513	0.444035	0.460125	arco_stri
CSRP1	hvc	stri	0.489503	0.0264333	-0.473156	-0.406505	-0.365847	0.342272	0.393988	0.439302	0.460137	hvc_stri
CSRP1	lman	stri	0.576052	-0.00799012	-0.447274	-0.423912	-0.365891	0.327102	0.396157	0.431452	0.458854	lman_stri
CSRP1	nido	stri	0.669952	0.0149875	-0.538026	-0.497807	-0.369237	0.313222	0.366843	0.542097	0.577366	nido_stri
CTC1	stri	nido	0.599778	-0.0187659	-0.442291	-0.432614	-0.372833	0.281482	0.327873	0.438639	0.510858	stri_nido
CTC1	stri	x	0.485722	-0.0307608	-0.616892	-0.461075	-0.390577	0.252357	0.314916	0.383311	0.419316	stri_x
CTC1	nido	stri	0.599778	-0.0187659	-0.442291	-0.432614	-0.372833	0.281482	0.327873	0.438639	0.510858	nido_stri
CTC1	x	stri	0.485722	-0.0307608	-0.616892	-0.461075	-0.390577	0.252357	0.314916	0.383311	0.419316	x_stri
CTSO	hvc	ra	0.584265	0.0260348	-0.492291	-0.463549	-0.410524	0.364593	0.416931	0.470147	0.527089	hvc_ra
CTSO	ra	hvc	0.584265	0.0260348	-0.492291	-0.463549	-0.410524	0.364593	0.416931	0.470147	0.527089	ra_hvc
CTSO	ncl	hvc	0.473428	-0.00758969	-0.417457	-0.401738	-0.310344	0.244179	0.283622	0.36219	0.411761	ncl_hvc
CTSO	hvc	ncl	0.473428	-0.00758969	-0.417457	-0.401738	-0.310344	0.244179	0.283622	0.36219	0.411761	hvc_ncl
CTSO	nido	lman	0.478028	0.00130571	-0.450713	-0.420514	-0.338754	0.297831	0.366896	0.405819	0.463174	nido_lman
CTSO	lman	nido	0.478028	0.00130571	-0.450713	-0.420514	-0.338754	0.297831	0.366896	0.405819	0.463174	lman_nido
CUL9	ncl	ra	0.532504	-0.0212377	-0.57391	-0.537197	-0.516609	0.291025	0.370357	0.418884	0.527324	ncl_ra
CUL9	ncl	arco	0.755021	-0.0496615	-0.576747	-0.485534	-0.442865	0.254323	0.308259	0.34929	0.410244	ncl_arco
CUL9	ra	ncl	0.532504	-0.0212377	-0.57391	-0.537197	-0.516609	0.291025	0.370357	0.418884	0.527324	ra_ncl
CUL9	arco	ncl	0.755021	-0.0496615	-0.576747	-0.485534	-0.442865	0.254323	0.308259	0.34929	0.410244	arco_ncl
CUL9	x	nido	0.55668	-0.0404319	-0.519046	-0.474424	-0.426852	0.223281	0.262271	0.308639	0.386751	x_nido
CUL9	nido	x	0.55668	-0.0404319	-0.519046	-0.474424	-0.426852	0.223281	0.262271	0.308639	0.386751	nido_x
CUL9	stri	x	0.487653	-0.0166258	-0.508131	-0.470314	-0.36773	0.309845	0.371854	0.386127	0.417097	stri_x
CUL9	x	stri	0.487653	-0.0166258	-0.508131	-0.470314	-0.36773	0.309845	0.371854	0.386127	0.417097	x_stri
CUNH12orf43	nido	arco	-0.382206	-0.00556442	-0.374384	-0.369276	-0.353992	0.24845	0.324422	0.385715	0.437863	nido_arco
CUNH12orf43	x	ncl	0.529614	-0.0205579	-0.564264	-0.468358	-0.41445	0.279141	0.398681	0.436887	0.459457	x_ncl
CUNH12orf43	arco	nido	-0.382206	-0.00556442	-0.374384	-0.369276	-0.353992	0.24845	0.324422	0.385715	0.437863	arco_nido
CUNH12orf43	ncl	x	0.529614	-0.0205579	-0.564264	-0.468358	-0.41445	0.279141	0.398681	0.436887	0.459457	ncl_x
CUNH15orf62	arco	ra	0.63648	0.0220927	-0.481433	-0.416709	-0.349248	0.351559	0.421279	0.519556	0.621749	arco_ra
CUNH15orf62	hvc	ra	0.701105	-0.000654516	-0.405099	-0.36643	-0.337356	0.265567	0.406441	0.465126	0.509707	hvc_ra
CUNH15orf62	ra	arco	0.63648	0.0220927	-0.481433	-0.416709	-0.349248	0.351559	0.421279	0.519556	0.621749	ra_arco
CUNH15orf62	ra	hvc	0.701105	-0.000654516	-0.405099	-0.36643	-0.337356	0.265567	0.406441	0.465126	0.509707	ra_hvc
CUNH15orf62	nido	lman	0.702823	0.0137649	-0.451807	-0.359928	-0.320124	0.277452	0.423596	0.507654	0.584137	nido_lman
CUNH15orf62	lman	nido	0.702823	0.0137649	-0.451807	-0.359928	-0.320124	0.277452	0.423596	0.507654	0.584137	lman_nido
CUNH18orf8	ncl	arco	0.433688	-0.0372085	-0.478152	-0.444696	-0.386681	0.252922	0.317101	0.388335	0.400547	ncl_arco
CUNH18orf8	nido	hvc	0.596941	-0.00523943	-0.518661	-0.377438	-0.361486	0.319621	0.402578	0.410361	0.444461	nido_hvc
CUNH18orf8	arco	ncl	0.433688	-0.0372085	-0.478152	-0.444696	-0.386681	0.252922	0.317101	0.388335	0.400547	arco_ncl
CUNH18orf8	hvc	nido	0.596941	-0.00523943	-0.518661	-0.377438	-0.361486	0.319621	0.402578	0.410361	0.444461	hvc_nido
CUNH21orf91	hvc	ra	0.575325	-0.00828527	-0.584714	-0.502964	-0.356988	0.317812	0.37284	0.433507	0.491913	hvc_ra
CUNH21orf91	lman	ra	0.578775	-0.0215975	-0.534299	-0.47223	-0.361006	0.261872	0.301015	0.329772	0.361658	lman_ra
CUNH21orf91	lman	arco	0.629206	0.00085685	-0.418374	-0.363627	-0.33786	0.321259	0.365302	0.469708	0.507221	lman_arco
CUNH21orf91	nido	arco	0.81923	-0.00360724	-0.626592	-0.500684	-0.477448	0.328284	0.371198	0.427758	0.439537	nido_arco
CUNH21orf91	stri	arco	0.531274	0.00656057	-0.601507	-0.501947	-0.406997	0.330273	0.396063	0.413991	0.466606	stri_arco
CUNH21orf91	ra	hvc	0.575325	-0.00828527	-0.584714	-0.502964	-0.356988	0.317812	0.37284	0.433507	0.491913	ra_hvc
CUNH21orf91	lman	ncl	0.517002	-0.0163683	-0.519651	-0.449865	-0.386765	0.260763	0.344043	0.376413	0.462901	lman_ncl
CUNH21orf91	nido	ncl	0.707687	0.0368709	-0.389421	-0.343748	-0.300633	0.307983	0.384338	0.403318	0.415266	nido_ncl
CUNH21orf91	ra	lman	0.578775	-0.0215975	-0.534299	-0.47223	-0.361006	0.261872	0.301015	0.329772	0.361658	ra_lman
CUNH21orf91	arco	lman	0.629206	0.00085685	-0.418374	-0.363627	-0.33786	0.321259	0.365302	0.469708	0.507221	arco_lman
CUNH21orf91	ncl	lman	0.517002	-0.0163683	-0.519651	-0.449865	-0.386765	0.260763	0.344043	0.376413	0.462901	ncl_lman
CUNH21orf91	nido	lman	0.712263	-0.0279821	-0.550943	-0.520277	-0.425805	0.281516	0.374038	0.440884	0.480251	nido_lman
CUNH21orf91	arco	nido	0.81923	-0.00360724	-0.626592	-0.500684	-0.477448	0.328284	0.371198	0.427758	0.439537	arco_nido
CUNH21orf91	ncl	nido	0.707687	0.0368709	-0.389421	-0.343748	-0.300633	0.307983	0.384338	0.403318	0.415266	ncl_nido
CUNH21orf91	lman	nido	0.712263	-0.0279821	-0.550943	-0.520277	-0.425805	0.281516	0.374038	0.440884	0.480251	lman_nido
CUNH21orf91	x	nido	0.452347	-0.0215884	-0.4763	-0.437417	-0.366985	0.2186	0.282911	0.357965	0.426793	x_nido
CUNH21orf91	stri	nido	0.530777	-0.0358348	-0.560889	-0.519585	-0.468122	0.266024	0.333705	0.361273	0.480549	stri_nido
CUNH21orf91	nido	x	0.452347	-0.0215884	-0.4763	-0.437417	-0.366985	0.2186	0.282911	0.357965	0.426793	nido_x
CUNH21orf91	arco	stri	0.531274	0.00656057	-0.601507	-0.501947	-0.406997	0.330273	0.396063	0.413991	0.466606	arco_stri
CUNH21orf91	nido	stri	0.530777	-0.0358348	-0.560889	-0.519585	-0.468122	0.266024	0.333705	0.361273	0.480549	nido_stri
CUNH2orf40	nido	ra	0.737133	0.00865158	-0.501322	-0.484018	-0.410041	0.341551	0.387653	0.486859	0.523825	nido_ra
CUNH2orf40	nido	arco	0.498385	-0.00949788	-0.386099	-0.371485	-0.273871	0.26481	0.370783	0.391137	0.423492	nido_arco
CUNH2orf40	ra	nido	0.737133	0.00865158	-0.501322	-0.484018	-0.410041	0.341551	0.387653	0.486859	0.523825	ra_nido
CUNH2orf40	arco	nido	0.498385	-0.00949788	-0.386099	-0.371485	-0.273871	0.26481	0.370783	0.391137	0.423492	arco_nido
CUNH3orf58	lman	ra	0.639016	0.0500089	-0.486515	-0.466548	-0.338892	0.390952	0.417545	0.499046	0.527638	lman_ra
CUNH3orf58	ra	lman	0.639016	0.0500089	-0.486515	-0.466548	-0.338892	0.390952	0.417545	0.499046	0.527638	ra_lman
CUNH5orf49	lman	ra	0.575896	-0.0127566	-0.5218	-0.497978	-0.453728	0.33161	0.388716	0.406417	0.547813	lman_ra
CUNH5orf49	stri	ra	0.579132	-0.0482789	-0.434694	-0.421008	-0.404088	0.285402	0.460729	0.497203	0.542162	stri_ra
CUNH5orf49	lman	arco	0.707844	-0.0425569	-0.502232	-0.476369	-0.426672	0.231133	0.270635	0.375617	0.436338	lman_arco
CUNH5orf49	nido	arco	0.666022	0.00557748	-0.468904	-0.43503	-0.411379	0.267078	0.428981	0.502319	0.607319	nido_arco
CUNH5orf49	ra	lman	0.575896	-0.0127566	-0.5218	-0.497978	-0.453728	0.33161	0.388716	0.406417	0.547813	ra_lman
CUNH5orf49	arco	lman	0.707844	-0.0425569	-0.502232	-0.476369	-0.426672	0.231133	0.270635	0.375617	0.436338	arco_lman
CUNH5orf49	nido	lman	0.689722	-0.0383077	-0.524482	-0.464331	-0.391859	0.271492	0.360245	0.476751	0.553271	nido_lman
CUNH5orf49	arco	nido	0.666022	0.00557748	-0.468904	-0.43503	-0.411379	0.267078	0.428981	0.502319	0.607319	arco_nido
CUNH5orf49	lman	nido	0.689722	-0.0383077	-0.524482	-0.464331	-0.391859	0.271492	0.360245	0.476751	0.553271	lman_nido
CUNH5orf49	ra	stri	0.579132	-0.0482789	-0.434694	-0.421008	-0.404088	0.285402	0.460729	0.497203	0.542162	ra_stri
CUNH5orf63	arco	ra	0.559097	-0.0025363	-0.511628	-0.486945	-0.44665	0.329582	0.393759	0.475249	0.520392	arco_ra
CUNH5orf63	hvc	ra	0.639286	-0.00812551	-0.530618	-0.468703	-0.436292	0.371826	0.425539	0.509543	0.588107	hvc_ra
CUNH5orf63	ncl	ra	0.59593	0.0418259	-0.600263	-0.419445	-0.344531	0.338641	0.419485	0.465215	0.47759	ncl_ra
CUNH5orf63	nido	ra	0.627338	-1.17674e-05	-0.526455	-0.435928	-0.397342	0.306616	0.485714	0.527265	0.536327	nido_ra
CUNH5orf63	x	ra	0.558581	0.0125321	-0.581358	-0.510426	-0.378013	0.347059	0.377753	0.39679	0.460032	x_ra
CUNH5orf63	ra	arco	0.559097	-0.0025363	-0.511628	-0.486945	-0.44665	0.329582	0.393759	0.475249	0.520392	ra_arco
CUNH5orf63	hvc	arco	0.567988	-0.00348393	-0.484159	-0.428424	-0.350956	0.266782	0.376241	0.389611	0.466228	hvc_arco
CUNH5orf63	nido	arco	0.433433	0.00574758	-0.413112	-0.401557	-0.374267	0.298113	0.356413	0.384652	0.391938	nido_arco
CUNH5orf63	ra	hvc	0.639286	-0.00812551	-0.530618	-0.468703	-0.436292	0.371826	0.425539	0.509543	0.588107	ra_hvc
CUNH5orf63	arco	hvc	0.567988	-0.00348393	-0.484159	-0.428424	-0.350956	0.266782	0.376241	0.389611	0.466228	arco_hvc
CUNH5orf63	x	hvc	0.467051	-0.0163884	-0.381831	-0.353223	-0.333602	0.238709	0.373756	0.429414	0.455943	x_hvc
CUNH5orf63	ra	ncl	0.59593	0.0418259	-0.600263	-0.419445	-0.344531	0.338641	0.419485	0.465215	0.47759	ra_ncl
CUNH5orf63	ra	nido	0.627338	-1.17674e-05	-0.526455	-0.435928	-0.397342	0.306616	0.485714	0.527265	0.536327	ra_nido
[truncated: 9,547 more rows]

## Sheet: Intact vs. Deaf differential co
gene_id	procedure2	Var1	Var2	value	value_sub_intact	value_abs_sub_intact	value_diff_abs_mean	value_diff_abs_q01	value_diff_abs_q025	value_diff_abs_q05	value_diff_abs_q90	value_diff_abs_q95	value_diff_abs_q975	value_diff_abs_q99	value_abs_sub_intact_sign
AACS	deaf	ncl	ra	-0.0666466	-0.833013	-0.69972	0.0171584	-0.723945	-0.629372	-0.506207	0.425809	0.476954	0.566668	0.682883	-1
AACS	deaf	x	ra	0.785391	0.660583	0.660583	-0.0598091	-0.801744	-0.687199	-0.603397	0.329883	0.452029	0.49464	0.653472	1
AACS	deaf	x	hvc	0.769031	0.69829	0.69829	-0.00125768	-0.568484	-0.548556	-0.510898	0.388215	0.545192	0.617362	0.693167	1
AACS	deaf	ra	ncl	-0.0666466	-0.833013	-0.69972	0.0171584	-0.723945	-0.629372	-0.506207	0.425809	0.476954	0.566668	0.682883	-1
AACS	deaf	stri	lman	0.180368	-0.53251	-0.53251	0.0210523	-0.509913	-0.473479	-0.437183	0.420054	0.575799	0.656598	0.691871	-1
AACS	deaf	ra	x	0.785391	0.660583	0.660583	-0.0598091	-0.801744	-0.687199	-0.603397	0.329883	0.452029	0.49464	0.653472	1
AACS	deaf	hvc	x	0.769031	0.69829	0.69829	-0.00125768	-0.568484	-0.548556	-0.510898	0.388215	0.545192	0.617362	0.693167	1
AACS	deaf	stri	x	0.916609	1.28664	0.546578	-0.0546528	-0.508815	-0.478572	-0.440673	0.285606	0.409464	0.463331	0.498904	1
AACS	deaf	lman	stri	0.180368	-0.53251	-0.53251	0.0210523	-0.509913	-0.473479	-0.437183	0.420054	0.575799	0.656598	0.691871	-1
AACS	deaf	x	stri	0.916609	1.28664	0.546578	-0.0546528	-0.508815	-0.478572	-0.440673	0.285606	0.409464	0.463331	0.498904	1
AAD-A	deaf	x	ra	0.868646	0.966161	0.771131	0.0213666	-0.425493	-0.352909	-0.310002	0.339435	0.502631	0.56495	0.581451	1
AAD-A	deaf	stri	ra	0.82144	0.79573	0.79573	0.00883607	-0.849039	-0.485484	-0.439762	0.303483	0.480302	0.53462	0.66749	1
AAD-A	deaf	stri	ncl	0.737622	0.599069	0.599069	-0.0190277	-0.657979	-0.592868	-0.464376	0.361285	0.458975	0.541221	0.576889	1
AAD-A	deaf	x	lman	0.815681	0.481769	0.481769	-0.0301975	-0.678082	-0.580417	-0.440488	0.335604	0.373318	0.415527	0.441095	1
AAD-A	deaf	ra	x	0.868646	0.966161	0.771131	0.0213666	-0.425493	-0.352909	-0.310002	0.339435	0.502631	0.56495	0.581451	1
AAD-A	deaf	lman	x	0.815681	0.481769	0.481769	-0.0301975	-0.678082	-0.580417	-0.440488	0.335604	0.373318	0.415527	0.441095	1
AAD-A	deaf	ra	stri	0.82144	0.79573	0.79573	0.00883607	-0.849039	-0.485484	-0.439762	0.303483	0.480302	0.53462	0.66749	1
AAD-A	deaf	ncl	stri	0.737622	0.599069	0.599069	-0.0190277	-0.657979	-0.592868	-0.464376	0.361285	0.458975	0.541221	0.576889	1
AASDH	deaf	arco	ra	-0.0314512	-0.645319	-0.582416	0.0382638	-0.568426	-0.470998	-0.385426	0.397594	0.500765	0.526184	0.55014	-1
AASDH	deaf	lman	ra	-0.145737	-0.842054	-0.55058	-0.000625754	-0.543894	-0.47897	-0.371781	0.371775	0.447482	0.457743	0.571563	-1
AASDH	deaf	x	ra	0.189962	-0.555729	-0.555729	0.0111969	-0.562639	-0.522499	-0.509304	0.380488	0.526264	0.624975	0.759471	-1
AASDH	deaf	ra	arco	-0.0314512	-0.645319	-0.582416	0.0382638	-0.568426	-0.470998	-0.385426	0.397594	0.500765	0.526184	0.55014	-1
AASDH	deaf	lman	arco	0.0680705	-0.595699	-0.595699	0.0345046	-0.537239	-0.466209	-0.399932	0.382278	0.421571	0.467872	0.542495	-1
AASDH	deaf	ra	lman	-0.145737	-0.842054	-0.55058	-0.000625754	-0.543894	-0.47897	-0.371781	0.371775	0.447482	0.457743	0.571563	-1
AASDH	deaf	arco	lman	0.0680705	-0.595699	-0.595699	0.0345046	-0.537239	-0.466209	-0.399932	0.382278	0.421571	0.467872	0.542495	-1
AASDH	deaf	nido	lman	-0.0642436	-0.815125	-0.686638	0.0463713	-0.658862	-0.537008	-0.385156	0.411841	0.532297	0.566784	0.576952	-1
AASDH	deaf	lman	nido	-0.0642436	-0.815125	-0.686638	0.0463713	-0.658862	-0.537008	-0.385156	0.411841	0.532297	0.566784	0.576952	-1
AASDH	deaf	ra	x	0.189962	-0.555729	-0.555729	0.0111969	-0.562639	-0.522499	-0.509304	0.380488	0.526264	0.624975	0.759471	-1
ABCA1	deaf	ncl	hvc	0.543737	0.521203	0.521203	-0.0359533	-0.597048	-0.534102	-0.468571	0.315112	0.454427	0.510975	0.571079	1
ABCA1	deaf	hvc	ncl	0.543737	0.521203	0.521203	-0.0359533	-0.597048	-0.534102	-0.468571	0.315112	0.454427	0.510975	0.571079	1
ABCC8	deaf	nido	lman	0.190642	-0.606089	-0.606089	0.0193482	-0.659738	-0.552331	-0.457803	0.325981	0.424071	0.503161	0.55909	-1
ABCC8	deaf	lman	nido	0.190642	-0.606089	-0.606089	0.0193482	-0.659738	-0.552331	-0.457803	0.325981	0.424071	0.503161	0.55909	-1
ABHD11	deaf	x	ra	0.720319	0.776991	0.663647	0.00770654	-0.492932	-0.474755	-0.445981	0.358425	0.472912	0.647738	0.716647	1
ABHD11	deaf	nido	arco	0.811394	0.968074	0.654715	-0.0423027	-0.639856	-0.607399	-0.483771	0.323929	0.350651	0.393001	0.477537	1
ABHD11	deaf	x	hvc	0.666568	0.689958	0.643177	0.0334108	-0.698479	-0.630057	-0.562962	0.382053	0.449257	0.485613	0.630597	1
ABHD11	deaf	arco	nido	0.811394	0.968074	0.654715	-0.0423027	-0.639856	-0.607399	-0.483771	0.323929	0.350651	0.393001	0.477537	1
ABHD11	deaf	ra	x	0.720319	0.776991	0.663647	0.00770654	-0.492932	-0.474755	-0.445981	0.358425	0.472912	0.647738	0.716647	1
ABHD11	deaf	hvc	x	0.666568	0.689958	0.643177	0.0334108	-0.698479	-0.630057	-0.562962	0.382053	0.449257	0.485613	0.630597	1
ABHD13	deaf	stri	lman	-0.0155278	-0.517291	-0.486235	0.0353575	-0.463286	-0.454306	-0.407129	0.384086	0.513913	0.586791	0.615201	-1
ABHD13	deaf	x	nido	0.256112	-0.445208	-0.445208	0.0231163	-0.533887	-0.441816	-0.418173	0.423511	0.458592	0.471417	0.482434	-1
ABHD13	deaf	nido	x	0.256112	-0.445208	-0.445208	0.0231163	-0.533887	-0.441816	-0.418173	0.423511	0.458592	0.471417	0.482434	-1
ABHD13	deaf	lman	stri	-0.0155278	-0.517291	-0.486235	0.0353575	-0.463286	-0.454306	-0.407129	0.384086	0.513913	0.586791	0.615201	-1
ABHD14A	deaf	hvc	arco	0.0461742	-0.687206	-0.687206	-0.00130343	-0.583538	-0.516992	-0.499573	0.331738	0.430087	0.507105	0.615713	-1
ABHD14A	deaf	arco	hvc	0.0461742	-0.687206	-0.687206	-0.00130343	-0.583538	-0.516992	-0.499573	0.331738	0.430087	0.507105	0.615713	-1
ABHD2	deaf	hvc	ra	0.33749	-0.401945	-0.401945	0.0819076	-0.521548	-0.385529	-0.343344	0.395735	0.47494	0.514882	0.553503	-1
ABHD2	deaf	nido	ra	0.210767	-0.427739	-0.427739	0.0361742	-0.446321	-0.333345	-0.325348	0.424123	0.493129	0.514552	0.547467	-1
ABHD2	deaf	ncl	arco	0.622765	0.539569	0.539569	-0.0207661	-0.646454	-0.606776	-0.492191	0.283834	0.368153	0.416167	0.492583	1
ABHD2	deaf	x	arco	-0.0530497	-0.808106	-0.702007	-0.0122062	-0.592728	-0.573561	-0.533825	0.364193	0.42211	0.519759	0.644664	-1
ABHD2	deaf	ra	hvc	0.33749	-0.401945	-0.401945	0.0819076	-0.521548	-0.385529	-0.343344	0.395735	0.47494	0.514882	0.553503	-1
ABHD2	deaf	lman	hvc	-0.0273384	-0.64533	-0.590653	-0.0121105	-0.450353	-0.443831	-0.3918	0.329888	0.444519	0.557515	0.602781	-1
ABHD2	deaf	arco	ncl	0.622765	0.539569	0.539569	-0.0207661	-0.646454	-0.606776	-0.492191	0.283834	0.368153	0.416167	0.492583	1
ABHD2	deaf	hvc	lman	-0.0273384	-0.64533	-0.590653	-0.0121105	-0.450353	-0.443831	-0.3918	0.329888	0.444519	0.557515	0.602781	-1
ABHD2	deaf	ra	nido	0.210767	-0.427739	-0.427739	0.0361742	-0.446321	-0.333345	-0.325348	0.424123	0.493129	0.514552	0.547467	-1
ABHD2	deaf	x	nido	0.224325	-0.465836	-0.465836	0.0371285	-0.606129	-0.463174	-0.424587	0.426345	0.478506	0.531146	0.544216	-1
ABHD2	deaf	arco	x	-0.0530497	-0.808106	-0.702007	-0.0122062	-0.592728	-0.573561	-0.533825	0.364193	0.42211	0.519759	0.644664	-1
ABHD2	deaf	nido	x	0.224325	-0.465836	-0.465836	0.0371285	-0.606129	-0.463174	-0.424587	0.426345	0.478506	0.531146	0.544216	-1
ABL1	deaf	stri	ra	-0.060544	-0.759183	-0.638095	0.011579	-0.580424	-0.533393	-0.491369	0.394404	0.467776	0.515558	0.578548	-1
ABL1	deaf	nido	arco	0.0671244	0.778267	-0.644018	0.00694923	-0.567236	-0.519168	-0.455751	0.388664	0.47166	0.566233	0.624375	-1
ABL1	deaf	arco	nido	0.0671244	0.778267	-0.644018	0.00694923	-0.567236	-0.519168	-0.455751	0.388664	0.47166	0.566233	0.624375	-1
ABL1	deaf	ra	stri	-0.060544	-0.759183	-0.638095	0.011579	-0.580424	-0.533393	-0.491369	0.394404	0.467776	0.515558	0.578548	-1
ABTB1	deaf	ncl	hvc	-0.510211	-0.539982	0.48044	9.95215e-05	-0.513759	-0.4877	-0.428286	0.357377	0.462501	0.466856	0.472868	1
ABTB1	deaf	nido	hvc	-0.300922	-1.14533	-0.543482	0.0412005	-0.547911	-0.47027	-0.38027	0.465093	0.505943	0.689932	0.74688	-1
ABTB1	deaf	hvc	ncl	-0.510211	-0.539982	0.48044	9.95215e-05	-0.513759	-0.4877	-0.428286	0.357377	0.462501	0.466856	0.472868	1
ABTB1	deaf	x	lman	-0.125437	-0.928524	-0.677649	0.00417469	-0.700111	-0.475107	-0.436733	0.362922	0.453163	0.514037	0.595301	-1
ABTB1	deaf	hvc	nido	-0.300922	-1.14533	-0.543482	0.0412005	-0.547911	-0.47027	-0.38027	0.465093	0.505943	0.689932	0.74688	-1
ABTB1	deaf	x	nido	0.216367	-0.621844	-0.621844	-0.0256295	-0.542153	-0.535004	-0.515212	0.345667	0.433246	0.470693	0.59397	-1
ABTB1	deaf	lman	x	-0.125437	-0.928524	-0.677649	0.00417469	-0.700111	-0.475107	-0.436733	0.362922	0.453163	0.514037	0.595301	-1
ABTB1	deaf	nido	x	0.216367	-0.621844	-0.621844	-0.0256295	-0.542153	-0.535004	-0.515212	0.345667	0.433246	0.470693	0.59397	-1
ABTB1	deaf	stri	x	0.0907481	-0.817452	-0.817452	-0.0568969	-0.595861	-0.593049	-0.544029	0.30465	0.467082	0.549139	0.58473	-1
ABTB1	deaf	x	stri	0.0907481	-0.817452	-0.817452	-0.0568969	-0.595861	-0.593049	-0.544029	0.30465	0.467082	0.549139	0.58473	-1
ACAD8	deaf	arco	ra	0.0697891	-0.601777	-0.601777	0.0324755	-0.516719	-0.478488	-0.398735	0.384173	0.521807	0.598375	0.682928	-1
ACAD8	deaf	ra	arco	0.0697891	-0.601777	-0.601777	0.0324755	-0.516719	-0.478488	-0.398735	0.384173	0.521807	0.598375	0.682928	-1
ACAD8	deaf	nido	hvc	0.647742	0.62455	0.62455	0.0268868	-0.548207	-0.53842	-0.509603	0.405437	0.536276	0.619335	0.69013	1
ACAD8	deaf	hvc	nido	0.647742	0.62455	0.62455	0.0268868	-0.548207	-0.53842	-0.509603	0.405437	0.536276	0.619335	0.69013	1
ACE	deaf	x	hvc	0.794943	0.832781	0.757104	0.0259994	-0.508451	-0.423663	-0.370516	0.369949	0.437838	0.52699	0.755533	1
ACE	deaf	stri	nido	0.783211	0.884227	0.682194	-0.0454344	-0.664116	-0.605335	-0.583502	0.325641	0.386939	0.50932	0.648183	1
ACE	deaf	hvc	x	0.794943	0.832781	0.757104	0.0259994	-0.508451	-0.423663	-0.370516	0.369949	0.437838	0.52699	0.755533	1
ACE	deaf	nido	stri	0.783211	0.884227	0.682194	-0.0454344	-0.664116	-0.605335	-0.583502	0.325641	0.386939	0.50932	0.648183	1
ACSBG2	deaf	nido	ncl	0.602724	0.59914	0.59914	-0.060795	-0.578758	-0.574495	-0.515088	0.281984	0.471836	0.549584	0.608843	1
ACSBG2	deaf	x	ncl	0.637229	0.531279	0.531279	-0.0388997	-0.778966	-0.686085	-0.565159	0.313755	0.395413	0.495732	0.537234	1
ACSBG2	deaf	ncl	nido	0.602724	0.59914	0.59914	-0.060795	-0.578758	-0.574495	-0.515088	0.281984	0.471836	0.549584	0.608843	1
ACSBG2	deaf	ncl	x	0.637229	0.531279	0.531279	-0.0388997	-0.778966	-0.686085	-0.565159	0.313755	0.395413	0.495732	0.537234	1
ACTL6A	deaf	hvc	arco	-0.221082	-1.0374	-0.595233	0.0345572	-0.545609	-0.498799	-0.402713	0.471231	0.523521	0.556289	0.575052	-1
ACTL6A	deaf	arco	hvc	-0.221082	-1.0374	-0.595233	0.0345572	-0.545609	-0.498799	-0.402713	0.471231	0.523521	0.556289	0.575052	-1
ACTL6A	deaf	x	lman	0.708826	0.647935	0.647935	-0.00433927	-0.514736	-0.465119	-0.419287	0.271555	0.326424	0.371246	0.536501	1
ACTL6A	deaf	lman	x	0.708826	0.647935	0.647935	-0.00433927	-0.514736	-0.465119	-0.419287	0.271555	0.326424	0.371246	0.536501	1
ACTR5	deaf	ncl	ra	0.641634	0.570948	0.570948	0.065184	-0.442343	-0.41185	-0.352477	0.424252	0.507496	0.53638	0.554965	1
ACTR5	deaf	ra	ncl	0.641634	0.570948	0.570948	0.065184	-0.442343	-0.41185	-0.352477	0.424252	0.507496	0.53638	0.554965	1
ACVRL1	deaf	nido	ra	-0.756134	-0.675233	0.675233	-0.028626	-0.566951	-0.545241	-0.516996	0.307585	0.442911	0.536782	0.598169	1
ACVRL1	deaf	x	ra	0.00489637	-0.696427	-0.696427	0.0453146	-0.64811	-0.51485	-0.400235	0.370394	0.432572	0.478799	0.617944	-1
ACVRL1	deaf	stri	ra	0.676787	0.661106	0.661106	-0.00225713	-0.692368	-0.522476	-0.367519	0.348404	0.416677	0.488533	0.540259	1
ACVRL1	deaf	ncl	hvc	-0.555611	-0.531903	0.531903	0.0238481	-0.566017	-0.52625	-0.470632	0.38839	0.449219	0.496545	0.524331	1
ACVRL1	deaf	hvc	ncl	-0.555611	-0.531903	0.531903	0.0238481	-0.566017	-0.52625	-0.470632	0.38839	0.449219	0.496545	0.524331	1
ACVRL1	deaf	ra	nido	-0.756134	-0.675233	0.675233	-0.028626	-0.566951	-0.545241	-0.516996	0.307585	0.442911	0.536782	0.598169	1
ACVRL1	deaf	ra	x	0.00489637	-0.696427	-0.696427	0.0453146	-0.64811	-0.51485	-0.400235	0.370394	0.432572	0.478799	0.617944	-1
ACVRL1	deaf	ra	stri	0.676787	0.661106	0.661106	-0.00225713	-0.692368	-0.522476	-0.367519	0.348404	0.416677	0.488533	0.540259	1
ADARB1	deaf	lman	hvc	0.0139231	0.602575	-0.574729	-0.00653371	-0.480502	-0.445627	-0.395161	0.332743	0.447481	0.488079	0.504099	-1
ADARB1	deaf	x	ncl	0.829732	1.10372	0.555743	-0.0484375	-0.87686	-0.791311	-0.628568	0.349104	0.394015	0.478181	0.545752	1
ADARB1	deaf	hvc	lman	0.0139231	0.602575	-0.574729	-0.00653371	-0.480502	-0.445627	-0.395161	0.332743	0.447481	0.488079	0.504099	-1
ADARB1	deaf	nido	lman	-0.0546239	0.540125	-0.540125	0.0321961	-0.501327	-0.430076	-0.403956	0.413988	0.537037	0.587942	0.610511	-1
ADARB1	deaf	lman	nido	-0.0546239	0.540125	-0.540125	0.0321961	-0.501327	-0.430076	-0.403956	0.413988	0.537037	0.587942	0.610511	-1
ADARB1	deaf	ncl	x	0.829732	1.10372	0.555743	-0.0484375	-0.87686	-0.791311	-0.628568	0.349104	0.394015	0.478181	0.545752	1
ADCK2	deaf	arco	ra	0.347524	-0.476746	-0.476746	0.0507331	-0.431568	-0.358704	-0.316144	0.453814	0.483213	0.584229	0.610053	-1
ADCK2	deaf	ncl	ra	0.264363	-0.620157	-0.620157	0.0119128	-0.589707	-0.516643	-0.492507	0.350575	0.441552	0.530234	0.676901	-1
ADCK2	deaf	lman	ra	-0.0330909	-0.771624	-0.705442	-0.0238158	-0.591629	-0.574542	-0.562349	0.333598	0.357728	0.484362	0.585391	-1
ADCK2	deaf	x	ra	0.230792	-0.67342	-0.67342	0.0546139	-0.526073	-0.510384	-0.452898	0.418625	0.50076	0.572565	0.600799	-1
ADCK2	deaf	ra	arco	0.347524	-0.476746	-0.476746	0.0507331	-0.431568	-0.358704	-0.316144	0.453814	0.483213	0.584229	0.610053	-1
ADCK2	deaf	stri	hvc	-0.00179141	-0.725794	-0.722212	0.00198979	-0.751442	-0.720568	-0.542807	0.382093	0.555799	0.634746	0.698313	-1
ADCK2	deaf	ra	ncl	0.264363	-0.620157	-0.620157	0.0119128	-0.589707	-0.516643	-0.492507	0.350575	0.441552	0.530234	0.676901	-1
ADCK2	deaf	lman	ncl	-0.0968945	-0.842041	-0.648253	0.0416616	-0.504997	-0.443525	-0.315728	0.390287	0.446485	0.492625	0.659128	-1
ADCK2	deaf	x	ncl	0.222159	-0.683533	-0.683533	-0.0238296	-0.670099	-0.618809	-0.541692	0.293398	0.399285	0.429249	0.577415	-1
ADCK2	deaf	stri	ncl	-0.0305133	-0.55019	-0.489164	0.0377881	-0.471362	-0.448637	-0.401272	0.424871	0.506483	0.578341	0.628394	-1
ADCK2	deaf	ra	lman	-0.0330909	-0.771624	-0.705442	-0.0238158	-0.591629	-0.574542	-0.562349	0.333598	0.357728	0.484362	0.585391	-1
ADCK2	deaf	ncl	lman	-0.0968945	-0.842041	-0.648253	0.0416616	-0.504997	-0.443525	-0.315728	0.390287	0.446485	0.492625	0.659128	-1
ADCK2	deaf	ra	x	0.230792	-0.67342	-0.67342	0.0546139	-0.526073	-0.510384	-0.452898	0.418625	0.50076	0.572565	0.600799	-1
ADCK2	deaf	ncl	x	0.222159	-0.683533	-0.683533	-0.0238296	-0.670099	-0.618809	-0.541692	0.293398	0.399285	0.429249	0.577415	-1
ADCK2	deaf	hvc	stri	-0.00179141	-0.725794	-0.722212	0.00198979	-0.751442	-0.720568	-0.542807	0.382093	0.555799	0.634746	0.698313	-1
ADCK2	deaf	ncl	stri	-0.0305133	-0.55019	-0.489164	0.0377881	-0.471362	-0.448637	-0.401272	0.424871	0.506483	0.578341	0.628394	-1
ADCY2	deaf	lman	ncl	0.218913	-0.680916	-0.680916	-0.0228671	-0.680949	-0.599889	-0.524018	0.327774	0.371919	0.39618	0.484818	-1
ADCY2	deaf	ncl	lman	0.218913	-0.680916	-0.680916	-0.0228671	-0.680949	-0.599889	-0.524018	0.327774	0.371919	0.39618	0.484818	-1
ADCY5	deaf	nido	ncl	-0.773487	-0.543372	0.543372	-0.0642018	-0.539398	-0.520147	-0.458171	0.296658	0.374374	0.516203	0.549909	1
ADCY5	deaf	nido	lman	-0.18316	-0.949359	-0.583039	-0.0431477	-0.626276	-0.536355	-0.445174	0.332518	0.424941	0.465614	0.491998	-1
ADCY5	deaf	x	lman	-0.349531	0.412684	-0.412684	0.0569205	-0.468919	-0.408809	-0.366591	0.377983	0.491489	0.546934	0.568864	-1
ADCY5	deaf	ncl	nido	-0.773487	-0.543372	0.543372	-0.0642018	-0.539398	-0.520147	-0.458171	0.296658	0.374374	0.516203	0.549909	1
ADCY5	deaf	lman	nido	-0.18316	-0.949359	-0.583039	-0.0431477	-0.626276	-0.536355	-0.445174	0.332518	0.424941	0.465614	0.491998	-1
ADCY5	deaf	lman	x	-0.349531	0.412684	-0.412684	0.0569205	-0.468919	-0.408809	-0.366591	0.377983	0.491489	0.546934	0.568864	-1
ADCYAP1	deaf	nido	hvc	0.140974	-0.76435	-0.76435	-0.00647349	-0.586417	-0.539206	-0.486053	0.409329	0.462075	0.526977	0.648284	-1
ADCYAP1	deaf	nido	lman	-0.124452	-0.651599	-0.402696	0.0527061	-0.46643	-0.396627	-0.357937	0.343918	0.391437	0.480633	0.643848	-1
ADCYAP1	deaf	x	lman	0.0633455	0.626206	-0.499515	-0.0262939	-0.496933	-0.431147	-0.350966	0.325144	0.397698	0.414862	0.450019	-1
ADCYAP1	deaf	hvc	nido	0.140974	-0.76435	-0.76435	-0.00647349	-0.586417	-0.539206	-0.486053	0.409329	0.462075	0.526977	0.648284	-1
ADCYAP1	deaf	lman	nido	-0.124452	-0.651599	-0.402696	0.0527061	-0.46643	-0.396627	-0.357937	0.343918	0.391437	0.480633	0.643848	-1
ADCYAP1	deaf	x	nido	-0.645433	-0.617468	0.617468	-0.0153328	-0.608491	-0.547716	-0.464995	0.343475	0.42605	0.462984	0.583388	1
ADCYAP1	deaf	lman	x	0.0633455	0.626206	-0.499515	-0.0262939	-0.496933	-0.431147	-0.350966	0.325144	0.397698	0.414862	0.450019	-1
ADCYAP1	deaf	nido	x	-0.645433	-0.617468	0.617468	-0.0153328	-0.608491	-0.547716	-0.464995	0.343475	0.42605	0.462984	0.583388	1
ADGRA3	deaf	arco	ra	-0.0689192	-0.61866	-0.480822	0.0326124	-0.483789	-0.443972	-0.423627	0.428201	0.499881	0.584848	0.685252	-1
ADGRA3	deaf	ra	arco	-0.0689192	-0.61866	-0.480822	0.0326124	-0.483789	-0.443972	-0.423627	0.428201	0.499881	0.584848	0.685252	-1
ADGRA3	deaf	lman	arco	-0.109573	-0.726481	-0.507334	0.0449839	-0.491437	-0.465599	-0.374185	0.399566	0.506195	0.603095	0.665716	-1
ADGRA3	deaf	lman	hvc	0.714947	0.448156	0.448156	0.00707197	-0.547367	-0.449291	-0.405829	0.34965	0.385189	0.443848	0.479685	1
ADGRA3	deaf	arco	lman	-0.109573	-0.726481	-0.507334	0.0449839	-0.491437	-0.465599	-0.374185	0.399566	0.506195	0.603095	0.665716	-1
ADGRA3	deaf	hvc	lman	0.714947	0.448156	0.448156	0.00707197	-0.547367	-0.449291	-0.405829	0.34965	0.385189	0.443848	0.479685	1
ADGRL2	deaf	stri	ncl	-0.096016	0.471659	-0.471659	0.050253	-0.483172	-0.418423	-0.379749	0.474709	0.515768	0.626056	0.674614	-1
ADGRL2	deaf	stri	nido	0.968511	0.660816	0.660816	0.00838028	-0.506405	-0.46144	-0.365514	0.379166	0.521638	0.576719	0.667779	1
ADGRL2	deaf	ncl	stri	-0.096016	0.471659	-0.471659	0.050253	-0.483172	-0.418423	-0.379749	0.474709	0.515768	0.626056	0.674614	-1
ADGRL2	deaf	nido	stri	0.968511	0.660816	0.660816	0.00838028	-0.506405	-0.46144	-0.365514	0.379166	0.521638	0.576719	0.667779	1
ADNP2	deaf	nido	ra	-0.668034	-0.771379	0.56469	0.0148624	-0.687761	-0.639964	-0.558655	0.368646	0.516478	0.560712	0.637295	1
ADNP2	deaf	ra	nido	-0.668034	-0.771379	0.56469	0.0148624	-0.687761	-0.639964	-0.558655	0.368646	0.516478	0.560712	0.637295	1
ADORA1	deaf	hvc	ra	0.120122	-0.57625	-0.57625	-0.0109721	-0.606606	-0.547251	-0.492313	0.367994	0.450411	0.506475	0.530606	-1
ADORA1	deaf	ra	hvc	0.120122	-0.57625	-0.57625	-0.0109721	-0.606606	-0.547251	-0.492313	0.367994	0.450411	0.506475	0.530606	-1
ADORA1	deaf	stri	hvc	-0.578926	-0.565036	0.565036	0.0282766	-0.617582	-0.463193	-0.377836	0.396982	0.462888	0.506049	0.549632	1
ADORA1	deaf	x	ncl	-0.244556	-0.968403	-0.47929	0.0568817	-0.511659	-0.429697	-0.328945	0.407447	0.49264	0.502995	0.574038	-1
ADORA1	deaf	stri	lman	0.0573607	-0.449076	-0.449076	0.010271	-0.536023	-0.436742	-0.415326	0.385195	0.460103	0.5264	0.604962	-1
ADORA1	deaf	ncl	x	-0.244556	-0.968403	-0.47929	0.0568817	-0.511659	-0.429697	-0.328945	0.407447	0.49264	0.502995	0.574038	-1
ADORA1	deaf	hvc	stri	-0.578926	-0.565036	0.565036	0.0282766	-0.617582	-0.463193	-0.377836	0.396982	0.462888	0.506049	0.549632	1
ADORA1	deaf	lman	stri	0.0573607	-0.449076	-0.449076	0.010271	-0.536023	-0.436742	-0.415326	0.385195	0.460103	0.5264	0.604962	-1
ADORA2A	deaf	nido	arco	-0.659747	-0.631189	0.631189	0.0219034	-0.518787	-0.483061	-0.456518	0.411026	0.479926	0.583224	0.631235	1
ADORA2A	deaf	stri	arco	0.589681	0.593633	0.585728	0.00320844	-0.641557	-0.520106	-0.462242	0.320452	0.395163	0.425297	0.44688	1
ADORA2A	deaf	lman	ncl	0.0141202	0.516529	-0.488288	0.011227	-0.478341	-0.461325	-0.364842	0.280235	0.501281	0.532835	0.713518	-1
ADORA2A	deaf	x	ncl	0.039993	-0.687012	-0.687012	0.0492256	-0.642435	-0.598142	-0.501942	0.44505	0.607589	0.623749	0.719024	-1
ADORA2A	deaf	ncl	lman	0.0141202	0.516529	-0.488288	0.011227	-0.478341	-0.461325	-0.364842	0.280235	0.501281	0.532835	0.713518	-1
ADORA2A	deaf	arco	nido	-0.659747	-0.631189	0.631189	0.0219034	-0.518787	-0.483061	-0.456518	0.411026	0.479926	0.583224	0.631235	1
ADORA2A	deaf	x	nido	-0.0751942	0.710887	-0.710887	0.0194666	-0.694744	-0.642592	-0.448381	0.398245	0.43324	0.53395	0.559872	-1
ADORA2A	deaf	ncl	x	0.039993	-0.687012	-0.687012	0.0492256	-0.642435	-0.598142	-0.501942	0.44505	0.607589	0.623749	0.719024	-1
ADORA2A	deaf	nido	x	-0.0751942	0.710887	-0.710887	0.0194666	-0.694744	-0.642592	-0.448381	0.398245	0.43324	0.53395	0.559872	-1
ADORA2A	deaf	arco	stri	0.589681	0.593633	0.585728	0.00320844	-0.641557	-0.520106	-0.462242	0.320452	0.395163	0.425297	0.44688	1
ADRA2C	deaf	hvc	arco	0.794516	0.794892	0.79414	0.0491477	-0.52797	-0.491673	-0.443266	0.413213	0.536337	0.622958	0.66995	1
ADRA2C	deaf	arco	hvc	0.794516	0.794892	0.79414	0.0491477	-0.52797	-0.491673	-0.443266	0.413213	0.536337	0.622958	0.66995	1
ADSSL1	deaf	lman	ncl	-0.560364	-0.504888	0.504888	-0.0427968	-0.69696	-0.631008	-0.564598	0.357322	0.400651	0.501604	0.576568	1
ADSSL1	deaf	ncl	lman	-0.560364	-0.504888	0.504888	-0.0427968	-0.69696	-0.631008	-0.564598	0.357322	0.400651	0.501604	0.576568	1
ADSSL1	deaf	stri	lman	0.0702564	-0.60546	-0.60546	0.0191315	-0.518249	-0.504109	-0.475975	0.453832	0.484428	0.653769	0.860499	-1
ADSSL1	deaf	stri	nido	0.623985	0.675622	0.572349	0.00766407	-0.711095	-0.625215	-0.566749	0.428303	0.470485	0.518128	0.575304	1
ADSSL1	deaf	stri	x	0.734418	0.543833	0.543833	-0.011493	-0.466187	-0.450827	-0.385033	0.371041	0.461147	0.492564	0.600742	1
ADSSL1	deaf	lman	stri	0.0702564	-0.60546	-0.60546	0.0191315	-0.518249	-0.504109	-0.475975	0.453832	0.484428	0.653769	0.860499	-1
ADSSL1	deaf	nido	stri	0.623985	0.675622	0.572349	0.00766407	-0.711095	-0.625215	-0.566749	0.428303	0.470485	0.518128	0.575304	1
ADSSL1	deaf	x	stri	0.734418	0.543833	0.543833	-0.011493	-0.466187	-0.450827	-0.385033	0.371041	0.461147	0.492564	0.600742	1
AGAP2	deaf	ncl	ra	-0.0431605	-0.805814	-0.719493	-0.0153234	-0.608032	-0.533782	-0.519413	0.262236	0.427501	0.476424	0.492337	-1
AGAP2	deaf	hvc	arco	0.0812386	-0.859921	-0.859921	0.0218577	-0.477753	-0.427788	-0.38769	0.319372	0.448115	0.510386	0.524807	-1
AGAP2	deaf	stri	arco	0.77475	0.613997	0.613997	0.0278839	-0.498136	-0.463936	-0.365157	0.352881	0.422248	0.561708	0.658919	1
AGAP2	deaf	arco	hvc	0.0812386	-0.859921	-0.859921	0.0218577	-0.477753	-0.427788	-0.38769	0.319372	0.448115	0.510386	0.524807	-1
AGAP2	deaf	ncl	hvc	0.204865	-0.486184	-0.486184	0.048077	-0.466953	-0.455537	-0.402068	0.441323	0.558362	0.586073	0.593704	-1
AGAP2	deaf	nido	hvc	-0.0145386	-0.873267	-0.84419	-0.0203225	-0.686862	-0.57698	-0.515268	0.301018	0.413418	0.499948	0.533879	-1
AGAP2	deaf	ra	ncl	-0.0431605	-0.805814	-0.719493	-0.0153234	-0.608032	-0.533782	-0.519413	0.262236	0.427501	0.476424	0.492337	-1
AGAP2	deaf	hvc	ncl	0.204865	-0.486184	-0.486184	0.048077	-0.466953	-0.455537	-0.402068	0.441323	0.558362	0.586073	0.593704	-1
AGAP2	deaf	nido	ncl	0.190662	-0.62647	-0.62647	0.0219648	-0.678564	-0.535853	-0.495426	0.389915	0.458834	0.513678	0.603836	-1
AGAP2	deaf	nido	lman	0.921307	0.646863	0.646863	0.0497889	-0.61003	-0.53842	-0.455003	0.440392	0.524631	0.571687	0.673941	1
AGAP2	deaf	x	lman	0.748406	0.639249	0.639249	0.030615	-0.721939	-0.664533	-0.529933	0.424689	0.494142	0.505146	0.514776	1
AGAP2	deaf	hvc	nido	-0.0145386	-0.873267	-0.84419	-0.0203225	-0.686862	-0.57698	-0.515268	0.301018	0.413418	0.499948	0.533879	-1
AGAP2	deaf	ncl	nido	0.190662	-0.62647	-0.62647	0.0219648	-0.678564	-0.535853	-0.495426	0.389915	0.458834	0.513678	0.603836	-1
AGAP2	deaf	lman	nido	0.921307	0.646863	0.646863	0.0497889	-0.61003	-0.53842	-0.455003	0.440392	0.524631	0.571687	0.673941	1
AGAP2	deaf	lman	x	0.748406	0.639249	0.639249	0.030615	-0.721939	-0.664533	-0.529933	0.424689	0.494142	0.505146	0.514776	1
AGAP2	deaf	arco	stri	0.77475	0.613997	0.613997	0.0278839	-0.498136	-0.463936	-0.365157	0.352881	0.422248	0.561708	0.658919	1
AGPAT4	deaf	arco	ra	-0.163743	-0.821505	-0.494018	-0.034144	-0.546535	-0.441825	-0.416194	0.273419	0.330745	0.419062	0.448248	-1
AGPAT4	deaf	ra	arco	-0.163743	-0.821505	-0.494018	-0.034144	-0.546535	-0.441825	-0.416194	0.273419	0.330745	0.419062	0.448248	-1
AGPAT4	deaf	nido	hvc	0.0589832	0.63067	-0.512704	-0.00343351	-0.577549	-0.495111	-0.447638	0.345861	0.48376	0.582273	0.698319	-1
AGPAT4	deaf	hvc	nido	0.0589832	0.63067	-0.512704	-0.00343351	-0.577549	-0.495111	-0.447638	0.345861	0.48376	0.582273	0.698319	-1
AGR2	deaf	ncl	ra	0.0379011	-0.6143	-0.6143	-0.0137517	-0.65058	-0.526664	-0.470113	0.337655	0.516093	0.53076	0.573594	-1
AGR2	deaf	ra	ncl	0.0379011	-0.6143	-0.6143	-0.0137517	-0.65058	-0.526664	-0.470113	0.337655	0.516093	0.53076	0.573594	-1
AGR2	deaf	nido	ncl	0.829274	0.77143	0.77143	-0.014295	-0.468737	-0.436584	-0.400221	0.330752	0.416623	0.493331	0.693033	1
AGR2	deaf	x	ncl	0.802508	0.607213	0.607213	-0.00976475	-0.481607	-0.425427	-0.358789	0.320659	0.421598	0.604069	0.658529	1
AGR2	deaf	ncl	nido	0.829274	0.77143	0.77143	-0.014295	-0.468737	-0.436584	-0.400221	0.330752	0.416623	0.493331	0.693033	1
AGR2	deaf	ncl	x	0.802508	0.607213	0.607213	-0.00976475	-0.481607	-0.425427	-0.358789	0.320659	0.421598	0.604069	0.658529	1
AHNAK2	deaf	hvc	arco	-0.724031	-0.503048	0.503048	-0.00284226	-0.588652	-0.542683	-0.499309	0.300271	0.374119	0.492713	0.504918	1
AHNAK2	deaf	arco	hvc	-0.724031	-0.503048	0.503048	-0.00284226	-0.588652	-0.542683	-0.499309	0.300271	0.374119	0.492713	0.504918	1
AIFM3	deaf	x	ncl	0.593522	0.536767	0.536767	-0.114924	-0.694863	-0.665176	-0.634556	0.360808	0.40876	0.49659	0.541681	1
AIFM3	deaf	x	lman	0.408416	1.27162	-0.454784	-0.0137543	-0.477009	-0.429003	-0.39461	0.313629	0.430286	0.482322	0.537786	-1
AIFM3	deaf	ncl	x	0.593522	0.536767	0.536767	-0.114924	-0.694863	-0.665176	-0.634556	0.360808	0.40876	0.49659	0.541681	1
AIFM3	deaf	lman	x	0.408416	1.27162	-0.454784	-0.0137543	-0.477009	-0.429003	-0.39461	0.313629	0.430286	0.482322	0.537786	-1
AK4	deaf	lman	arco	0.177907	-0.672743	-0.672743	-0.0281632	-0.523142	-0.488222	-0.425345	0.251825	0.392711	0.4879	0.605904	-1
AK4	deaf	stri	arco	0.885897	0.567567	0.567567	-0.0765472	-0.825794	-0.695035	-0.657619	0.314747	0.351135	0.478883	0.540452	1
AK4	deaf	x	ncl	0.773267	0.69535	0.69535	-0.0248167	-0.641416	-0.541735	-0.523188	0.349627	0.432465	0.516988	0.5796	1
AK4	deaf	stri	ncl	0.616863	0.66315	0.570576	0.00938893	-0.686711	-0.576867	-0.509806	0.392412	0.448981	0.492293	0.57578	1
AK4	deaf	arco	lman	0.177907	-0.672743	-0.672743	-0.0281632	-0.523142	-0.488222	-0.425345	0.251825	0.392711	0.4879	0.605904	-1
AK4	deaf	nido	lman	0.173286	-0.442155	-0.442155	0.0547894	-0.52616	-0.400881	-0.313701	0.398975	0.491747	0.566925	0.634013	-1
AK4	deaf	lman	nido	0.173286	-0.442155	-0.442155	0.0547894	-0.52616	-0.400881	-0.313701	0.398975	0.491747	0.566925	0.634013	-1
AK4	deaf	x	nido	0.825095	0.699147	0.699147	-0.110362	-0.565097	-0.552294	-0.530132	0.198504	0.285046	0.411745	0.52258	1
AK4	deaf	ncl	x	0.773267	0.69535	0.69535	-0.0248167	-0.641416	-0.541735	-0.523188	0.349627	0.432465	0.516988	0.5796	1
AK4	deaf	nido	x	0.825095	0.699147	0.699147	-0.110362	-0.565097	-0.552294	-0.530132	0.198504	0.285046	0.411745	0.52258	1
AK4	deaf	arco	stri	0.885897	0.567567	0.567567	-0.0765472	-0.825794	-0.695035	-0.657619	0.314747	0.351135	0.478883	0.540452	1
AK4	deaf	ncl	stri	0.616863	0.66315	0.570576	0.00938893	-0.686711	-0.576867	-0.509806	0.392412	0.448981	0.492293	0.57578	1
AKAP17A	deaf	stri	ncl	-0.714845	-0.795878	0.633811	0.0539797	-0.540481	-0.496834	-0.439428	0.465731	0.507175	0.525404	0.663458	1
AKAP17A	deaf	nido	lman	-0.0268995	-0.722456	-0.668657	-0.0279004	-0.561977	-0.513789	-0.45627	0.361699	0.471233	0.524347	0.624038	-1
AKAP17A	deaf	x	lman	0.153627	-0.755768	-0.755768	-0.0243135	-0.658353	-0.640587	-0.583733	0.34164	0.471287	0.582144	0.676944	-1
AKAP17A	deaf	lman	nido	-0.0268995	-0.722456	-0.668657	-0.0279004	-0.561977	-0.513789	-0.45627	0.361699	0.471233	0.524347	0.624038	-1
AKAP17A	deaf	lman	x	0.153627	-0.755768	-0.755768	-0.0243135	-0.658353	-0.640587	-0.583733	0.34164	0.471287	0.582144	0.676944	-1
AKAP17A	deaf	ncl	stri	-0.714845	-0.795878	0.633811	0.0539797	-0.540481	-0.496834	-0.439428	0.465731	0.507175	0.525404	0.663458	1
AKAP8	deaf	arco	ra	0.0587469	-0.54093	-0.54093	0.0134398	-0.525807	-0.481583	-0.407724	0.339555	0.397709	0.478868	0.511358	-1
AKAP8	deaf	lman	ra	-0.120105	-0.762688	-0.522479	-0.00119436	-0.422425	-0.368186	-0.347374	0.302026	0.441764	0.500765	0.536684	-1
AKAP8	deaf	ra	arco	0.0587469	-0.54093	-0.54093	0.0134398	-0.525807	-0.481583	-0.407724	0.339555	0.397709	0.478868	0.511358	-1
AKAP8	deaf	hvc	arco	-0.000731849	-0.550347	-0.548884	0.0403379	-0.473964	-0.412	-0.360772	0.423236	0.498586	0.558465	0.574954	-1
AKAP8	deaf	arco	hvc	-0.000731849	-0.550347	-0.548884	0.0403379	-0.473964	-0.412	-0.360772	0.423236	0.498586	0.558465	0.574954	-1
AKAP8	deaf	stri	hvc	0.0295373	-0.728962	-0.728962	-0.0333628	-0.597599	-0.574039	-0.467688	0.324202	0.375281	0.530964	0.561406	-1
AKAP8	deaf	nido	ncl	0.750094	0.521279	0.521279	0.028694	-0.502041	-0.456484	-0.444444	0.344602	0.420055	0.441511	0.46954	1
AKAP8	deaf	ra	lman	-0.120105	-0.762688	-0.522479	-0.00119436	-0.422425	-0.368186	-0.347374	0.302026	0.441764	0.500765	0.536684	-1
AKAP8	deaf	ncl	nido	0.750094	0.521279	0.521279	0.028694	-0.502041	-0.456484	-0.444444	0.344602	0.420055	0.441511	0.46954	1
AKAP8	deaf	hvc	stri	0.0295373	-0.728962	-0.728962	-0.0333628	-0.597599	-0.574039	-0.467688	0.324202	0.375281	0.530964	0.561406	-1
ALDH1A2	deaf	x	arco	0.170478	-0.495266	-0.495266	-0.00574377	-0.515234	-0.450569	-0.394139	0.366974	0.423629	0.465724	0.517856	-1
ALDH1A2	deaf	arco	x	0.170478	-0.495266	-0.495266	-0.00574377	-0.515234	-0.450569	-0.394139	0.366974	0.423629	0.465724	0.517856	-1
ALDH1A2	deaf	stri	x	0.964653	0.964344	0.964344	-0.0416704	-0.68193	-0.677882	-0.642457	0.340814	0.430435	0.494672	0.554062	1
ALDH1A2	deaf	x	stri	0.964653	0.964344	0.964344	-0.0416704	-0.68193	-0.677882	-0.642457	0.340814	0.430435	0.494672	0.554062	1
ALDH4A1	deaf	arco	ra	0.761564	0.888172	0.634956	0.0123389	-0.580368	-0.497699	-0.460246	0.3611	0.479051	0.558519	0.584011	1
ALDH4A1	deaf	ra	arco	0.761564	0.888172	0.634956	0.0123389	-0.580368	-0.497699	-0.460246	0.3611	0.479051	0.558519	0.584011	1
ALDH4A1	deaf	lman	arco	0.597774	0.707534	0.488014	-0.0169377	-0.638174	-0.631996	-0.485873	0.336993	0.397184	0.483174	0.545523	1
ALDH4A1	deaf	arco	lman	0.597774	0.707534	0.488014	-0.0169377	-0.638174	-0.631996	-0.485873	0.336993	0.397184	0.483174	0.545523	1
ALDH4A1	deaf	nido	lman	0.508085	0.507848	0.507848	-0.0321675	-0.649416	-0.537864	-0.471127	0.356236	0.436262	0.485114	0.700137	1
ALDH4A1	deaf	lman	nido	0.508085	0.507848	0.507848	-0.0321675	-0.649416	-0.537864	-0.471127	0.356236	0.436262	0.485114	0.700137	1
ALG10B	deaf	ncl	arco	-0.159922	-0.940275	-0.620431	0.0256868	-0.502677	-0.480056	-0.443498	0.32342	0.36033	0.487657	0.543536	-1
ALG10B	deaf	arco	ncl	-0.159922	-0.940275	-0.620431	0.0256868	-0.502677	-0.480056	-0.443498	0.32342	0.36033	0.487657	0.543536	-1
ALG10B	deaf	x	lman	0.600463	0.677338	0.523588	-0.00110856	-0.663446	-0.599359	-0.538727	0.410312	0.477748	0.493519	0.509056	1
ALG10B	deaf	x	nido	0.730593	0.742348	0.718838	0.00244952	-0.566967	-0.432317	-0.374016	0.282286	0.368866	0.551763	0.592209	1
ALG10B	deaf	lman	x	0.600463	0.677338	0.523588	-0.00110856	-0.663446	-0.599359	-0.538727	0.410312	0.477748	0.493519	0.509056	1
ALG10B	deaf	nido	x	0.730593	0.742348	0.718838	0.00244952	-0.566967	-0.432317	-0.374016	0.282286	0.368866	0.551763	0.592209	1
ALG10B	deaf	stri	x	0.620854	0.621073	0.620635	-0.0143737	-0.598194	-0.518563	-0.428607	0.326427	0.514016	0.556319	0.666766	1
ALG10B	deaf	x	stri	0.620854	0.621073	0.620635	-0.0143737	-0.598194	-0.518563	-0.428607	0.326427	0.514016	0.556319	0.666766	1
ALKBH2	deaf	ncl	ra	-0.83859	-0.895924	0.781256	-0.00552928	-0.59871	-0.536719	-0.429434	0.29453	0.419293	0.482306	0.585339	1
ALKBH2	deaf	x	hvc	0.580547	0.583497	0.577597	-0.0295196	-0.690299	-0.607881	-0.540728	0.338719	0.447194	0.500698	0.614752	1
ALKBH2	deaf	ra	ncl	-0.83859	-0.895924	0.781256	-0.00552928	-0.59871	-0.536719	-0.429434	0.29453	0.419293	0.482306	0.585339	1
ALKBH2	deaf	nido	ncl	-0.88574	-0.817891	0.817891	-0.0200933	-0.562571	-0.528927	-0.468993	0.287893	0.388966	0.497654	0.557376	1
ALKBH2	deaf	ncl	nido	-0.88574	-0.817891	0.817891	-0.0200933	-0.562571	-0.528927	-0.468993	0.287893	0.388966	0.497654	0.557376	1
ALKBH2	deaf	x	nido	0.186936	0.896297	-0.522426	-0.0172637	-0.64601	-0.516505	-0.443872	0.333526	0.382904	0.438682	0.471556	-1
ALKBH2	deaf	stri	nido	-0.156925	0.680969	-0.680969	0.0484872	-0.598154	-0.453071	-0.40099	0.348382	0.573174	0.635733	0.721309	-1
ALKBH2	deaf	hvc	x	0.580547	0.583497	0.577597	-0.0295196	-0.690299	-0.607881	-0.540728	0.338719	0.447194	0.500698	0.614752	1
ALKBH2	deaf	nido	x	0.186936	0.896297	-0.522426	-0.0172637	-0.64601	-0.516505	-0.443872	0.333526	0.382904	0.438682	0.471556	-1
ALKBH2	deaf	nido	stri	-0.156925	0.680969	-0.680969	0.0484872	-0.598154	-0.453071	-0.40099	0.348382	0.573174	0.635733	0.721309	-1
AMBP	deaf	lman	ra	-0.089867	-0.906769	-0.727035	0.0045678	-0.498212	-0.483507	-0.391074	0.344738	0.400879	0.454524	0.50449	-1
AMBP	deaf	ncl	hvc	0.0458104	-0.543526	-0.543526	0.0262711	-0.494892	-0.449884	-0.430456	0.369601	0.48394	0.534937	0.732084	-1
AMBP	deaf	x	hvc	-0.170871	-0.848595	-0.506853	0.0311273	-0.466139	-0.420675	-0.360224	0.285038	0.408477	0.467546	0.579218	-1
AMBP	deaf	hvc	ncl	0.0458104	-0.543526	-0.543526	0.0262711	-0.494892	-0.449884	-0.430456	0.369601	0.48394	0.534937	0.732084	-1
AMBP	deaf	ra	lman	-0.089867	-0.906769	-0.727035	0.0045678	-0.498212	-0.483507	-0.391074	0.344738	0.400879	0.454524	0.50449	-1
AMBP	deaf	hvc	x	-0.170871	-0.848595	-0.506853	0.0311273	-0.466139	-0.420675	-0.360224	0.285038	0.408477	0.467546	0.579218	-1
AMIGO2	deaf	nido	ncl	-0.0171873	-0.606696	-0.572321	-0.0175803	-0.572948	-0.550031	-0.47224	0.279525	0.322285	0.391015	0.406226	-1
AMIGO2	deaf	ncl	nido	-0.0171873	-0.606696	-0.572321	-0.0175803	-0.572948	-0.550031	-0.47224	0.279525	0.322285	0.391015	0.406226	-1
AMN1	deaf	x	lman	0.132537	-0.547663	-0.547663	0.0325232	-0.532955	-0.478598	-0.385066	0.368742	0.4624	0.481877	0.594445	-1
AMN1	deaf	stri	nido	0.256795	-0.530886	-0.530886	0.0125095	-0.495495	-0.434897	-0.39952	0.354082	0.387029	0.461987	0.509694	-1
AMN1	deaf	lman	x	0.132537	-0.547663	-0.547663	0.0325232	-0.532955	-0.478598	-0.385066	0.368742	0.4624	0.481877	0.594445	-1
AMN1	deaf	nido	stri	0.256795	-0.530886	-0.530886	0.0125095	-0.495495	-0.434897	-0.39952	0.354082	0.387029	0.461987	0.509694	-1
ANGPT2	deaf	hvc	arco	-0.051948	-0.622482	-0.518586	-0.0402109	-0.545732	-0.517235	-0.462794	0.286837	0.360104	0.482825	0.528571	-1
ANGPT2	deaf	x	arco	0.695912	0.534937	0.534937	0.0305124	-0.435031	-0.417495	-0.359217	0.36995	0.470328	0.518746	0.540386	1
ANGPT2	deaf	arco	hvc	-0.051948	-0.622482	-0.518586	-0.0402109	-0.545732	-0.517235	-0.462794	0.286837	0.360104	0.482825	0.528571	-1
ANGPT2	deaf	stri	ncl	-0.171649	-0.885596	-0.542298	0.0246606	-0.662688	-0.528786	-0.441674	0.392639	0.436178	0.5475	0.565623	-1
ANGPT2	deaf	stri	lman	0.676249	0.558556	0.558556	-0.0191705	-0.667047	-0.631066	-0.597203	0.450357	0.49848	0.533308	0.600242	1
ANGPT2	deaf	x	nido	0.791435	0.826804	0.756067	0.0189651	-0.589539	-0.556754	-0.52941	0.374632	0.510293	0.62203	0.700174	1
ANGPT2	deaf	arco	x	0.695912	0.534937	0.534937	0.0305124	-0.435031	-0.417495	-0.359217	0.36995	0.470328	0.518746	0.540386	1
ANGPT2	deaf	nido	x	0.791435	0.826804	0.756067	0.0189651	-0.589539	-0.556754	-0.52941	0.374632	0.510293	0.62203	0.700174	1
ANGPT2	deaf	ncl	stri	-0.171649	-0.885596	-0.542298	0.0246606	-0.662688	-0.528786	-0.441674	0.392639	0.436178	0.5475	0.565623	-1
ANGPT2	deaf	lman	stri	0.676249	0.558556	0.558556	-0.0191705	-0.667047	-0.631066	-0.597203	0.450357	0.49848	0.533308	0.600242	1
ANKDD1A	deaf	nido	ra	-0.603948	-0.620811	0.587085	0.0352028	-0.523753	-0.500675	-0.425566	0.435518	0.530947	0.578304	0.605532	1
ANKDD1A	deaf	stri	hvc	0.0642964	-0.597318	-0.597318	-0.0315119	-0.601831	-0.526041	-0.469209	0.315255	0.428151	0.508435	0.652662	-1
ANKDD1A	deaf	ra	nido	-0.603948	-0.620811	0.587085	0.0352028	-0.523753	-0.500675	-0.425566	0.435518	0.530947	0.578304	0.605532	1
ANKDD1A	deaf	hvc	stri	0.0642964	-0.597318	-0.597318	-0.0315119	-0.601831	-0.526041	-0.469209	0.315255	0.428151	0.508435	0.652662	-1
ANKFN1	deaf	x	ra	0.670146	0.685733	0.654559	-0.0157081	-0.516355	-0.487253	-0.43962	0.273343	0.333039	0.390506	0.500417	1
ANKFN1	deaf	nido	hvc	0.799559	0.653489	0.653489	-0.0387792	-0.540723	-0.520854	-0.467603	0.317184	0.498928	0.525348	0.561951	1
ANKFN1	deaf	x	ncl	-0.185128	-1.00909	-0.638836	0.015386	-0.525899	-0.435596	-0.38633	0.357387	0.443593	0.646372	0.666417	-1
ANKFN1	deaf	hvc	nido	0.799559	0.653489	0.653489	-0.0387792	-0.540723	-0.520854	-0.467603	0.317184	0.498928	0.525348	0.561951	1
ANKFN1	deaf	ra	x	0.670146	0.685733	0.654559	-0.0157081	-0.516355	-0.487253	-0.43962	0.273343	0.333039	0.390506	0.500417	1
ANKFN1	deaf	ncl	x	-0.185128	-1.00909	-0.638836	0.015386	-0.525899	-0.435596	-0.38633	0.357387	0.443593	0.646372	0.666417	-1
ANKRD55	deaf	stri	ra	-0.00971075	-0.657624	-0.638202	-0.014802	-0.647054	-0.526591	-0.424874	0.378354	0.445115	0.507345	0.65719	-1
ANKRD55	deaf	x	arco	-0.120417	-0.802022	-0.561188	0.0138448	-0.446752	-0.422042	-0.388705	0.384346	0.447088	0.540346	0.711025	-1
ANKRD55	deaf	arco	x	-0.120417	-0.802022	-0.561188	0.0138448	-0.446752	-0.422042	-0.388705	0.384346	0.447088	0.540346	0.711025	-1
ANKRD55	deaf	ra	stri	-0.00971075	-0.657624	-0.638202	-0.014802	-0.647054	-0.526591	-0.424874	0.378354	0.445115	0.507345	0.65719	-1
ANKRD6	deaf	stri	ra	0.730361	0.649726	0.649726	0.0666011	-0.687345	-0.581084	-0.447431	0.409164	0.497106	0.595722	0.639104	1
ANKRD6	deaf	x	hvc	0.637754	0.578413	0.578413	-0.017416	-0.531507	-0.450829	-0.409198	0.293414	0.361461	0.414627	0.524768	1
ANKRD6	deaf	hvc	x	0.637754	0.578413	0.578413	-0.017416	-0.531507	-0.450829	-0.409198	0.293414	0.361461	0.414627	0.524768	1
ANKRD6	deaf	ra	stri	0.730361	0.649726	0.649726	0.0666011	-0.687345	-0.581084	-0.447431	0.409164	0.497106	0.595722	0.639104	1
ANXA11	deaf	x	ncl	0.013654	-0.583134	-0.583134	0.00620009	-0.435779	-0.410886	-0.384693	0.338603	0.380868	0.467697	0.542673	-1
ANXA11	deaf	x	lman	0.0448677	-0.605038	-0.605038	-0.0103443	-0.578715	-0.468315	-0.459575	0.360844	0.473802	0.49654	0.543169	-1
ANXA11	deaf	ncl	x	0.013654	-0.583134	-0.583134	0.00620009	-0.435779	-0.410886	-0.384693	0.338603	0.380868	0.467697	0.542673	-1
ANXA11	deaf	lman	x	0.0448677	-0.605038	-0.605038	-0.0103443	-0.578715	-0.468315	-0.459575	0.360844	0.473802	0.49654	0.543169	-1
ANXA2	deaf	stri	hvc	0.709296	0.550862	0.550862	0.0239486	-0.610345	-0.549433	-0.500948	0.352018	0.417244	0.497779	0.528567	1
ANXA2	deaf	hvc	stri	0.709296	0.550862	0.550862	0.0239486	-0.610345	-0.549433	-0.500948	0.352018	0.417244	0.497779	0.528567	1
ANXA5	deaf	nido	hvc	0.102708	-0.625841	-0.625841	-0.0204554	-0.663618	-0.578173	-0.439879	0.389737	0.448048	0.555827	0.57954	-1
ANXA5	deaf	x	lman	-0.207816	0.433731	-0.433731	0.0358898	-0.509862	-0.424444	-0.381774	0.360508	0.442319	0.628686	0.661894	-1
ANXA5	deaf	hvc	nido	0.102708	-0.625841	-0.625841	-0.0204554	-0.663618	-0.578173	-0.439879	0.389737	0.448048	0.555827	0.57954	-1
ANXA5	deaf	lman	x	-0.207816	0.433731	-0.433731	0.0358898	-0.509862	-0.424444	-0.381774	0.360508	0.442319	0.628686	0.661894	-1
ANXA7	deaf	hvc	ra	0.00644148	-0.821222	-0.821222	0.0383049	-0.411626	-0.361979	-0.308313	0.402984	0.502122	0.572289	0.604439	-1
ANXA7	deaf	ncl	arco	0.654976	0.587398	0.587398	0.0387046	-0.556886	-0.427658	-0.413194	0.430916	0.525265	0.565419	0.576354	1
ANXA7	deaf	lman	arco	-0.0853894	-0.764839	-0.59406	0.0241777	-0.600879	-0.553633	-0.447107	0.324695	0.391591	0.514559	0.593442	-1
ANXA7	deaf	ra	hvc	0.00644148	-0.821222	-0.821222	0.0383049	-0.411626	-0.361979	-0.308313	0.402984	0.502122	0.572289	0.604439	-1
ANXA7	deaf	arco	ncl	0.654976	0.587398	0.587398	0.0387046	-0.556886	-0.427658	-0.413194	0.430916	0.525265	0.565419	0.576354	1
ANXA7	deaf	arco	lman	-0.0853894	-0.764839	-0.59406	0.0241777	-0.600879	-0.553633	-0.447107	0.324695	0.391591	0.514559	0.593442	-1
AOAH	deaf	x	arco	0.620612	0.641731	0.599492	0.0342813	-0.530999	-0.401755	-0.361967	0.315283	0.486069	0.527926	0.56789	1
AOAH	deaf	x	hvc	-0.0092897	-0.616404	-0.597825	0.0200122	-0.594107	-0.533894	-0.51962	0.387225	0.591158	0.672908	0.697041	-1
AOAH	deaf	nido	ncl	0.0336509	-0.711623	-0.711623	-0.0470991	-0.602619	-0.539778	-0.463143	0.255887	0.516372	0.58524	0.622604	-1
AOAH	deaf	ncl	nido	0.0336509	-0.711623	-0.711623	-0.0470991	-0.602619	-0.539778	-0.463143	0.255887	0.516372	0.58524	0.622604	-1
AOAH	deaf	x	nido	0.696889	0.819742	0.574037	-0.0281398	-0.513873	-0.50003	-0.484703	0.333683	0.368464	0.409947	0.627163	1
AOAH	deaf	arco	x	0.620612	0.641731	0.599492	0.0342813	-0.530999	-0.401755	-0.361967	0.315283	0.486069	0.527926	0.56789	1
AOAH	deaf	hvc	x	-0.0092897	-0.616404	-0.597825	0.0200122	-0.594107	-0.533894	-0.51962	0.387225	0.591158	0.672908	0.697041	-1
AOAH	deaf	nido	x	0.696889	0.819742	0.574037	-0.0281398	-0.513873	-0.50003	-0.484703	0.333683	0.368464	0.409947	0.627163	1
AP4E1	deaf	hvc	arco	0.0393869	-0.562274	-0.562274	-0.00181451	-0.538912	-0.504856	-0.47635	0.374158	0.562182	0.646775	0.72078	-1
AP4E1	deaf	ncl	arco	0.027824	-0.598825	-0.598825	0.0591112	-0.517459	-0.437428	-0.378685	0.368933	0.55917	0.600654	0.705942	-1
AP4E1	deaf	stri	arco	0.729902	0.712863	0.712863	-0.0338619	-0.556106	-0.520774	-0.489719	0.324522	0.402338	0.520898	0.582986	1
AP4E1	deaf	arco	hvc	0.0393869	-0.562274	-0.562274	-0.00181451	-0.538912	-0.504856	-0.47635	0.374158	0.562182	0.646775	0.72078	-1
AP4E1	deaf	nido	hvc	-0.78454	-0.611013	0.611013	0.00986334	-0.623134	-0.421861	-0.380883	0.338793	0.451058	0.514881	0.610078	1
AP4E1	deaf	arco	ncl	0.027824	-0.598825	-0.598825	0.0591112	-0.517459	-0.437428	-0.378685	0.368933	0.55917	0.600654	0.705942	-1
AP4E1	deaf	hvc	nido	-0.78454	-0.611013	0.611013	0.00986334	-0.623134	-0.421861	-0.380883	0.338793	0.451058	0.514881	0.610078	1
AP4E1	deaf	arco	stri	0.729902	0.712863	0.712863	-0.0338619	-0.556106	-0.520774	-0.489719	0.324522	0.402338	0.520898	0.582986	1
AP5S1	deaf	nido	arco	-0.0220303	-0.554257	-0.510196	0.0100352	-0.576537	-0.499337	-0.439338	0.309409	0.39221	0.489998	0.513066	-1
AP5S1	deaf	nido	hvc	0.770396	0.750065	0.750065	-0.0730666	-0.594399	-0.524164	-0.502064	0.354863	0.417719	0.533097	0.618016	1
AP5S1	deaf	arco	nido	-0.0220303	-0.554257	-0.510196	0.0100352	-0.576537	-0.499337	-0.439338	0.309409	0.39221	0.489998	0.513066	-1
AP5S1	deaf	hvc	nido	0.770396	0.750065	0.750065	-0.0730666	-0.594399	-0.524164	-0.502064	0.354863	0.417719	0.533097	0.618016	1
AP5S1	deaf	stri	nido	0.561573	0.546563	0.546563	-0.0501026	-0.566487	-0.532462	-0.499811	0.294052	0.362119	0.466551	0.578718	1
AP5S1	deaf	nido	stri	0.561573	0.546563	0.546563	-0.0501026	-0.566487	-0.532462	-0.499811	0.294052	0.362119	0.466551	0.578718	1
APBB1	deaf	x	ra	0.187221	-0.541259	-0.541259	-0.028725	-0.539325	-0.504781	-0.457281	0.356081	0.490479	0.596982	0.710092	-1
APBB1	deaf	hvc	arco	0.157902	-0.5501	-0.5501	0.0345122	-0.573085	-0.517224	-0.385255	0.33884	0.439254	0.533226	0.557559	-1
APBB1	deaf	stri	arco	0.0288363	-0.583329	-0.583329	-0.00464255	-0.506355	-0.475502	-0.425946	0.349107	0.463548	0.513738	0.583376	-1
APBB1	deaf	arco	hvc	0.157902	-0.5501	-0.5501	0.0345122	-0.573085	-0.517224	-0.385255	0.33884	0.439254	0.533226	0.557559	-1
APBB1	deaf	ra	x	0.187221	-0.541259	-0.541259	-0.028725	-0.539325	-0.504781	-0.457281	0.356081	0.490479	0.596982	0.710092	-1
APBB1	deaf	arco	stri	0.0288363	-0.583329	-0.583329	-0.00464255	-0.506355	-0.475502	-0.425946	0.349107	0.463548	0.513738	0.583376	-1
APOPT1	deaf	nido	ra	0.730278	0.856084	0.604472	-0.0820349	-0.581205	-0.57273	-0.472679	0.225759	0.329484	0.369694	0.403769	1
APOPT1	deaf	nido	lman	0.0251012	-0.839521	-0.839521	0.0382489	-0.547225	-0.465363	-0.402404	0.422842	0.56175	0.6247	0.69329	-1
APOPT1	deaf	ra	nido	0.730278	0.856084	0.604472	-0.0820349	-0.581205	-0.57273	-0.472679	0.225759	0.329484	0.369694	0.403769	1
APOPT1	deaf	lman	nido	0.0251012	-0.839521	-0.839521	0.0382489	-0.547225	-0.465363	-0.402404	0.422842	0.56175	0.6247	0.69329	-1
ARFGAP2	deaf	x	ra	-0.0987379	-0.915253	-0.717778	-0.0126423	-0.560766	-0.524866	-0.477272	0.335279	0.41105	0.505458	0.576012	-1
ARFGAP2	deaf	nido	arco	-0.0569653	-0.825344	-0.711413	0.0323227	-0.580015	-0.552298	-0.481382	0.448014	0.538316	0.587807	0.651049	-1
ARFGAP2	deaf	x	lman	0.201676	-0.581481	-0.581481	-0.00992882	-0.609216	-0.548692	-0.516971	0.415594	0.478494	0.512018	0.520916	-1
ARFGAP2	deaf	arco	nido	-0.0569653	-0.825344	-0.711413	0.0323227	-0.580015	-0.552298	-0.481382	0.448014	0.538316	0.587807	0.651049	-1
ARFGAP2	deaf	x	nido	-0.0285542	-0.636759	-0.57965	-0.0322259	-0.486733	-0.468731	-0.437126	0.243547	0.377431	0.477427	0.615391	-1
ARFGAP2	deaf	ra	x	-0.0987379	-0.915253	-0.717778	-0.0126423	-0.560766	-0.524866	-0.477272	0.335279	0.41105	0.505458	0.576012	-1
ARFGAP2	deaf	lman	x	0.201676	-0.581481	-0.581481	-0.00992882	-0.609216	-0.548692	-0.516971	0.415594	0.478494	0.512018	0.520916	-1
ARFGAP2	deaf	nido	x	-0.0285542	-0.636759	-0.57965	-0.0322259	-0.486733	-0.468731	-0.437126	0.243547	0.377431	0.477427	0.615391	-1
ARFGAP3	deaf	arco	ra	-0.0285075	-0.713884	-0.656869	0.00347463	-0.584453	-0.544818	-0.479398	0.366554	0.432375	0.550959	0.595277	-1
ARFGAP3	deaf	x	ra	-0.617273	-0.601317	0.601317	-0.0152966	-0.59293	-0.545968	-0.48014	0.3186	0.506691	0.587794	0.619383	1
ARFGAP3	deaf	stri	ra	0.624019	0.644858	0.60318	-0.0322831	-0.843821	-0.558785	-0.463931	0.298865	0.372874	0.44482	0.516708	1
ARFGAP3	deaf	ra	arco	-0.0285075	-0.713884	-0.656869	0.00347463	-0.584453	-0.544818	-0.479398	0.366554	0.432375	0.550959	0.595277	-1
ARFGAP3	deaf	lman	arco	0.0232292	-0.621374	-0.621374	0.0802758	-0.558476	-0.534825	-0.36048	0.404858	0.493352	0.565752	0.608102	-1
ARFGAP3	deaf	arco	lman	0.0232292	-0.621374	-0.621374	0.0802758	-0.558476	-0.534825	-0.36048	0.404858	0.493352	0.565752	0.608102	-1
ARFGAP3	deaf	ra	x	-0.617273	-0.601317	0.601317	-0.0152966	-0.59293	-0.545968	-0.48014	0.3186	0.506691	0.587794	0.619383	1
ARFGAP3	deaf	stri	x	-0.794363	-0.978855	0.60987	-0.0234493	-0.633656	-0.570704	-0.514287	0.270015	0.364539	0.410063	0.539074	1
ARFGAP3	deaf	ra	stri	0.624019	0.644858	0.60318	-0.0322831	-0.843821	-0.558785	-0.463931	0.298865	0.372874	0.44482	0.516708	1
ARFGAP3	deaf	x	stri	-0.794363	-0.978855	0.60987	-0.0234493	-0.633656	-0.570704	-0.514287	0.270015	0.364539	0.410063	0.539074	1
ARHGAP10	deaf	lman	arco	0.703669	0.671575	0.671575	-0.0321324	-0.506732	-0.484075	-0.44709	0.293996	0.340356	0.404227	0.424512	1
ARHGAP10	deaf	lman	hvc	-0.143769	-0.803757	-0.516219	-0.0145167	-0.532902	-0.45417	-0.434845	0.386008	0.441963	0.482125	0.593905	-1
ARHGAP10	deaf	x	hvc	-0.00638438	0.803293	-0.803293	0.0134669	-0.623453	-0.507748	-0.45584	0.354636	0.452395	0.535648	0.652066	-1
ARHGAP10	deaf	arco	lman	0.703669	0.671575	0.671575	-0.0321324	-0.506732	-0.484075	-0.44709	0.293996	0.340356	0.404227	0.424512	1
ARHGAP10	deaf	hvc	lman	-0.143769	-0.803757	-0.516219	-0.0145167	-0.532902	-0.45417	-0.434845	0.386008	0.441963	0.482125	0.593905	-1
ARHGAP10	deaf	hvc	x	-0.00638438	0.803293	-0.803293	0.0134669	-0.623453	-0.507748	-0.45584	0.354636	0.452395	0.535648	0.652066	-1
ARHGAP19	deaf	x	hvc	0.112541	-0.620137	-0.620137	-0.0286441	-0.600507	-0.491838	-0.445579	0.393231	0.456315	0.505353	0.531006	-1
ARHGAP19	deaf	stri	hvc	-0.018176	-0.697659	-0.661307	0.0678378	-0.402327	-0.392728	-0.3451	0.426203	0.512115	0.547455	0.586469	-1
ARHGAP19	deaf	stri	lman	-0.605727	-0.552615	0.552615	-0.0454015	-0.608594	-0.557426	-0.50676	0.315542	0.456746	0.489978	0.654898	1
ARHGAP19	deaf	hvc	x	0.112541	-0.620137	-0.620137	-0.0286441	-0.600507	-0.491838	-0.445579	0.393231	0.456315	0.505353	0.531006	-1
ARHGAP19	deaf	hvc	stri	-0.018176	-0.697659	-0.661307	0.0678378	-0.402327	-0.392728	-0.3451	0.426203	0.512115	0.547455	0.586469	-1
ARHGAP19	deaf	lman	stri	-0.605727	-0.552615	0.552615	-0.0454015	-0.608594	-0.557426	-0.50676	0.315542	0.456746	0.489978	0.654898	1
ARHGAP22	deaf	nido	ra	0.890176	0.574654	0.574654	-0.0166915	-0.482699	-0.450482	-0.407179	0.288458	0.450645	0.496364	0.621755	1
ARHGAP22	deaf	nido	ncl	0.177194	0.879971	-0.525582	-0.00822873	-0.547928	-0.508163	-0.444603	0.406001	0.487596	0.594052	0.768363	-1
ARHGAP22	deaf	ra	nido	0.890176	0.574654	0.574654	-0.0166915	-0.482699	-0.450482	-0.407179	0.288458	0.450645	0.496364	0.621755	1
ARHGAP22	deaf	ncl	nido	0.177194	0.879971	-0.525582	-0.00822873	-0.547928	-0.508163	-0.444603	0.406001	0.487596	0.594052	0.768363	-1
ARHGAP44	deaf	x	lman	0.0165403	-0.827265	-0.827265	-0.0392267	-0.553175	-0.521387	-0.50394	0.448271	0.497859	0.611497	0.733622	-1
ARHGAP44	deaf	lman	x	0.0165403	-0.827265	-0.827265	-0.0392267	-0.553175	-0.521387	-0.50394	0.448271	0.497859	0.611497	0.733622	-1
ARL8A	deaf	lman	ncl	0.0557306	-0.572112	-0.572112	0.0872461	-0.547078	-0.498691	-0.423442	0.393125	0.457616	0.517967	0.537081	-1
ARL8A	deaf	ncl	lman	0.0557306	-0.572112	-0.572112	0.0872461	-0.547078	-0.498691	-0.423442	0.393125	0.457616	0.517967	0.537081	-1
ARMC2	deaf	nido	arco	-0.0134856	-0.527829	-0.500858	0.0724614	-0.47618	-0.457013	-0.340267	0.39649	0.485438	0.555257	0.578527	-1
ARMC2	deaf	arco	nido	-0.0134856	-0.527829	-0.500858	0.0724614	-0.47618	-0.457013	-0.340267	0.39649	0.485438	0.555257	0.578527	-1
ARMC7	deaf	nido	ra	0.133644	-0.706875	-0.706875	-0.010909	-0.870029	-0.674046	-0.53058	0.358158	0.635702	0.673927	0.741253	-1
ARMC7	deaf	lman	arco	0.185781	-0.542274	-0.542274	0.0389561	-0.545877	-0.428891	-0.342658	0.327414	0.406903	0.478466	0.61474	-1
ARMC7	deaf	nido	hvc	-0.0444837	-0.683603	-0.594636	-0.0251467	-0.580153	-0.522477	-0.470821	0.344417	0.48346	0.547472	0.561241	-1
ARMC7	deaf	lman	ncl	0.128082	-0.617065	-0.617065	0.0165347	-0.480109	-0.449403	-0.381098	0.290864	0.382118	0.45913	0.511364	-1
ARMC7	deaf	arco	lman	0.185781	-0.542274	-0.542274	0.0389561	-0.545877	-0.428891	-0.342658	0.327414	0.406903	0.478466	0.61474	-1
ARMC7	deaf	ncl	lman	0.128082	-0.617065	-0.617065	0.0165347	-0.480109	-0.449403	-0.381098	0.290864	0.382118	0.45913	0.511364	-1
ARMC7	deaf	ra	nido	0.133644	-0.706875	-0.706875	-0.010909	-0.870029	-0.674046	-0.53058	0.358158	0.635702	0.673927	0.741253	-1
ARMC7	deaf	hvc	nido	-0.0444837	-0.683603	-0.594636	-0.0251467	-0.580153	-0.522477	-0.470821	0.344417	0.48346	0.547472	0.561241	-1
ARMC7	deaf	x	nido	0.110126	-0.631824	-0.631824	0.00306751	-0.576992	-0.563925	-0.511279	0.389906	0.489644	0.530993	0.563949	-1
ARMC7	deaf	nido	x	0.110126	-0.631824	-0.631824	0.00306751	-0.576992	-0.563925	-0.511279	0.389906	0.489644	0.530993	0.563949	-1
ARMC7	deaf	stri	x	0.805177	0.619337	0.619337	0.000564555	-0.538381	-0.528302	-0.473061	0.375186	0.454318	0.554105	0.618923	1
ARMC7	deaf	x	stri	0.805177	0.619337	0.619337	0.000564555	-0.538381	-0.528302	-0.473061	0.375186	0.454318	0.554105	0.618923	1
ARSK	deaf	arco	ra	0.0546933	0.880368	-0.770981	0.000735202	-0.545778	-0.489188	-0.414964	0.380091	0.458214	0.551825	0.604448	-1
ARSK	deaf	ra	arco	0.0546933	0.880368	-0.770981	0.000735202	-0.545778	-0.489188	-0.414964	0.380091	0.458214	0.551825	0.604448	-1
ASAH1	deaf	stri	ra	0.786594	0.623783	0.623783	-0.0177928	-0.576304	-0.527249	-0.516709	0.394946	0.479352	0.533315	0.554115	1
ASAH1	deaf	ncl	hvc	0.805294	0.591866	0.591866	0.0458454	-0.487821	-0.41324	-0.351525	0.413447	0.484315	0.506456	0.636436	1
ASAH1	deaf	hvc	ncl	0.805294	0.591866	0.591866	0.0458454	-0.487821	-0.41324	-0.351525	0.413447	0.484315	0.506456	0.636436	1
ASAH1	deaf	stri	lman	0.74734	0.507865	0.507865	-0.000467167	-0.700084	-0.629301	-0.471503	0.363538	0.428363	0.499101	0.54067	1
ASAH1	deaf	ra	stri	0.786594	0.623783	0.623783	-0.0177928	-0.576304	-0.527249	-0.516709	0.394946	0.479352	0.533315	0.554115	1
ASAH1	deaf	lman	stri	0.74734	0.507865	0.507865	-0.000467167	-0.700084	-0.629301	-0.471503	0.363538	0.428363	0.499101	0.54067	1
ASCC3	deaf	nido	ra	-0.779394	-0.916009	0.64278	0.00343032	-0.685622	-0.583866	-0.54758	0.433643	0.549715	0.618635	0.662402	1
ASCC3	deaf	ncl	arco	0.578495	0.56847	0.56847	-0.0145007	-0.599305	-0.563425	-0.456594	0.356033	0.394129	0.495228	0.561724	1
ASCC3	deaf	x	arco	-0.187268	-0.8779	-0.503364	-0.0196877	-0.59313	-0.488394	-0.459274	0.365271	0.43929	0.512088	0.5633	-1
ASCC3	deaf	arco	ncl	0.578495	0.56847	0.56847	-0.0145007	-0.599305	-0.563425	-0.456594	0.356033	0.394129	0.495228	0.561724	1
ASCC3	deaf	ra	nido	-0.779394	-0.916009	0.64278	0.00343032	-0.685622	-0.583866	-0.54758	0.433643	0.549715	0.618635	0.662402	1
ASCC3	deaf	arco	x	-0.187268	-0.8779	-0.503364	-0.0196877	-0.59313	-0.488394	-0.459274	0.365271	0.43929	0.512088	0.5633	-1
ASNA1	deaf	nido	lman	0.0975029	-0.521921	-0.521921	0.0448587	-0.527987	-0.477498	-0.417698	0.390553	0.476567	0.58508	0.64383	-1
ASNA1	deaf	lman	nido	0.0975029	-0.521921	-0.521921	0.0448587	-0.527987	-0.477498	-0.417698	0.390553	0.476567	0.58508	0.64383	-1
ASPG	deaf	hvc	ra	0.0601083	-0.680008	-0.680008	0.0397854	-0.554899	-0.485514	-0.355883	0.392194	0.515601	0.59858	0.677592	-1
ASPG	deaf	ra	hvc	0.0601083	-0.680008	-0.680008	0.0397854	-0.554899	-0.485514	-0.355883	0.392194	0.515601	0.59858	0.677592	-1
ASPH	deaf	lman	hvc	-0.832248	-0.523637	0.523637	-0.00860217	-0.562386	-0.523021	-0.412396	0.301207	0.395418	0.481431	0.686487	1
ASPH	deaf	hvc	lman	-0.832248	-0.523637	0.523637	-0.00860217	-0.562386	-0.523021	-0.412396	0.301207	0.395418	0.481431	0.686487	1
ASS1	deaf	ncl	arco	0.848969	0.781674	0.781674	0.00131138	-0.636144	-0.534488	-0.460108	0.386675	0.429815	0.548978	0.581479	1
ASS1	deaf	x	hvc	0.0695574	-0.537588	-0.537588	-0.0179714	-0.609309	-0.523855	-0.501298	0.437	0.512031	0.565997	0.696636	-1
ASS1	deaf	arco	ncl	0.848969	0.781674	0.781674	0.00131138	-0.636144	-0.534488	-0.460108	0.386675	0.429815	0.548978	0.581479	1
ASS1	deaf	hvc	x	0.0695574	-0.537588	-0.537588	-0.0179714	-0.609309	-0.523855	-0.501298	0.437	0.512031	0.565997	0.696636	-1
ATG14	deaf	ncl	arco	-0.708228	-0.862426	0.554031	0.00871917	-0.692915	-0.662085	-0.57573	0.334362	0.378541	0.447654	0.555338	1
ATG14	deaf	stri	arco	0.0831357	-0.50073	-0.50073	0.0147962	-0.576814	-0.440805	-0.409364	0.323232	0.394777	0.444104	0.545188	-1
ATG14	deaf	arco	ncl	-0.708228	-0.862426	0.554031	0.00871917	-0.692915	-0.662085	-0.57573	0.334362	0.378541	0.447654	0.555338	1
ATG14	deaf	stri	nido	0.104356	-0.539786	-0.539786	-0.0300831	-0.544643	-0.528825	-0.486605	0.300881	0.398213	0.449022	0.536953	-1
ATG14	deaf	stri	x	-0.182172	-0.986122	-0.621779	0.0338333	-0.463284	-0.458774	-0.342404	0.37907	0.520626	0.563397	0.589687	-1
ATG14	deaf	arco	stri	0.0831357	-0.50073	-0.50073	0.0147962	-0.576814	-0.440805	-0.409364	0.323232	0.394777	0.444104	0.545188	-1
ATG14	deaf	nido	stri	0.104356	-0.539786	-0.539786	-0.0300831	-0.544643	-0.528825	-0.486605	0.300881	0.398213	0.449022	0.536953	-1
ATG14	deaf	x	stri	-0.182172	-0.986122	-0.621779	0.0338333	-0.463284	-0.458774	-0.342404	0.37907	0.520626	0.563397	0.589687	-1
ATG4A	deaf	lman	ncl	-0.211424	0.576236	-0.576236	0.0502984	-0.546478	-0.502694	-0.455189	0.437541	0.546145	0.578377	0.644433	-1
ATG4A	deaf	stri	ncl	0.67596	0.63482	0.63482	-0.0163996	-0.561478	-0.47351	-0.416901	0.313685	0.414313	0.505724	0.570412	1
ATG4A	deaf	ncl	lman	-0.211424	0.576236	-0.576236	0.0502984	-0.546478	-0.502694	-0.455189	0.437541	0.546145	0.578377	0.644433	-1
ATG4A	deaf	ncl	stri	0.67596	0.63482	0.63482	-0.0163996	-0.561478	-0.47351	-0.416901	0.313685	0.414313	0.505724	0.570412	1
ATP13A2	deaf	arco	ra	0.730831	0.622652	0.622652	0.0045783	-0.825877	-0.703219	-0.640992	0.410863	0.493738	0.548698	0.582697	1
ATP13A2	deaf	ra	arco	0.730831	0.622652	0.622652	0.0045783	-0.825877	-0.703219	-0.640992	0.410863	0.493738	0.548698	0.582697	1
ATP13A2	deaf	stri	hvc	0.687878	0.778003	0.597752	0.0392869	-0.537561	-0.44361	-0.346489	0.360836	0.477376	0.551323	0.597775	1
ATP13A2	deaf	stri	nido	-0.110623	-0.856297	-0.63505	0.0354009	-0.535695	-0.505226	-0.445298	0.438611	0.576766	0.651621	0.677262	-1
ATP13A2	deaf	hvc	stri	0.687878	0.778003	0.597752	0.0392869	-0.537561	-0.44361	-0.346489	0.360836	0.477376	0.551323	0.597775	1
ATP13A2	deaf	nido	stri	-0.110623	-0.856297	-0.63505	0.0354009	-0.535695	-0.505226	-0.445298	0.438611	0.576766	0.651621	0.677262	-1
ATP1A2	deaf	nido	ncl	0.785057	0.705122	0.705122	0.00209319	-0.655584	-0.631641	-0.470848	0.321627	0.438948	0.588856	0.637568	1
ATP1A2	deaf	ncl	nido	0.785057	0.705122	0.705122	0.00209319	-0.655584	-0.631641	-0.470848	0.321627	0.438948	0.588856	0.637568	1
ATP2A3	deaf	arco	ra	0.576945	0.622103	0.531788	-0.00211027	-0.417783	-0.403472	-0.355324	0.306623	0.369603	0.437804	0.52002	1
ATP2A3	deaf	ra	arco	0.576945	0.622103	0.531788	-0.00211027	-0.417783	-0.403472	-0.355324	0.306623	0.369603	0.437804	0.52002	1
ATP2A3	deaf	nido	arco	0.72215	0.875771	0.56853	0.0103145	-0.629981	-0.521541	-0.402999	0.33565	0.391719	0.462852	0.70848	1
ATP2A3	deaf	stri	arco	0.78677	0.631609	0.631609	-0.0655172	-0.508123	-0.493451	-0.421001	0.193338	0.329727	0.402761	0.434412	1
ATP2A3	deaf	arco	nido	0.72215	0.875771	0.56853	0.0103145	-0.629981	-0.521541	-0.402999	0.33565	0.391719	0.462852	0.70848	1
ATP2A3	deaf	arco	stri	0.78677	0.631609	0.631609	-0.0655172	-0.508123	-0.493451	-0.421001	0.193338	0.329727	0.402761	0.434412	1
ATP6V1C2	deaf	ncl	arco	0.738764	0.676102	0.676102	-0.0147947	-0.545953	-0.517711	-0.47254	0.356999	0.461225	0.568823	0.758011	1
ATP6V1C2	deaf	lman	arco	0.468107	-0.495657	-0.495657	0.0202896	-0.466535	-0.454241	-0.445808	0.413874	0.533805	0.584502	0.687654	-1
ATP6V1C2	deaf	nido	arco	0.0150667	-0.864209	-0.864209	0.0338465	-0.625098	-0.589223	-0.516655	0.47295	0.601724	0.624946	0.654716	-1
ATP6V1C2	deaf	stri	arco	0.198147	-0.55902	-0.55902	0.0109402	-0.577374	-0.530744	-0.459641	0.383643	0.498159	0.559931	0.683185	-1
ATP6V1C2	deaf	nido	hvc	0.0336256	-0.567282	-0.567282	-0.0523373	-0.552227	-0.547195	-0.520077	0.337557	0.424794	0.447809	0.467612	-1
ATP6V1C2	deaf	arco	ncl	0.738764	0.676102	0.676102	-0.0147947	-0.545953	-0.517711	-0.47254	0.356999	0.461225	0.568823	0.758011	1
ATP6V1C2	deaf	arco	lman	0.468107	-0.495657	-0.495657	0.0202896	-0.466535	-0.454241	-0.445808	0.413874	0.533805	0.584502	0.687654	-1
ATP6V1C2	deaf	arco	nido	0.0150667	-0.864209	-0.864209	0.0338465	-0.625098	-0.589223	-0.516655	0.47295	0.601724	0.624946	0.654716	-1
ATP6V1C2	deaf	hvc	nido	0.0336256	-0.567282	-0.567282	-0.0523373	-0.552227	-0.547195	-0.520077	0.337557	0.424794	0.447809	0.467612	-1
ATP6V1C2	deaf	arco	stri	0.198147	-0.55902	-0.55902	0.0109402	-0.577374	-0.530744	-0.459641	0.383643	0.498159	0.559931	0.683185	-1
ATP7A	deaf	arco	ra	-0.681178	-0.795907	0.566449	0.0225064	-0.482379	-0.422879	-0.365978	0.340633	0.429831	0.482292	0.675026	1
ATP7A	deaf	ra	arco	-0.681178	-0.795907	0.566449	0.0225064	-0.482379	-0.422879	-0.365978	0.340633	0.429831	0.482292	0.675026	1
B3GALT5	deaf	lman	hvc	-0.0748075	-0.816169	-0.666554	0.00548441	-0.687201	-0.565498	-0.473189	0.411431	0.514749	0.606865	0.733762	-1
B3GALT5	deaf	nido	hvc	-0.771352	-0.796087	0.746617	0.0252837	-0.50744	-0.48472	-0.387061	0.425691	0.508764	0.555513	0.584807	1
B3GALT5	deaf	hvc	lman	-0.0748075	-0.816169	-0.666554	0.00548441	-0.687201	-0.565498	-0.473189	0.411431	0.514749	0.606865	0.733762	-1
B3GALT5	deaf	hvc	nido	-0.771352	-0.796087	0.746617	0.0252837	-0.50744	-0.48472	-0.387061	0.425691	0.508764	0.555513	0.584807	1
B9D1	deaf	lman	hvc	0.551028	0.540326	0.540326	0.0243146	-0.438435	-0.423683	-0.340901	0.34798	0.452819	0.534816	0.623638	1
B9D1	deaf	hvc	lman	0.551028	0.540326	0.540326	0.0243146	-0.438435	-0.423683	-0.340901	0.34798	0.452819	0.534816	0.623638	1
B9D1	deaf	nido	lman	0.162686	-0.633445	-0.633445	0.0128477	-0.551182	-0.523213	-0.477155	0.431218	0.489151	0.521787	0.594596	-1
B9D1	deaf	lman	nido	0.162686	-0.633445	-0.633445	0.0128477	-0.551182	-0.523213	-0.477155	0.431218	0.489151	0.521787	0.594596	-1
BAHD1	deaf	hvc	arco	0.0556983	-0.69224	-0.69224	0.00387441	-0.577733	-0.551007	-0.471227	0.390308	0.472275	0.496275	0.584311	-1
BAHD1	deaf	arco	hvc	0.0556983	-0.69224	-0.69224	0.00387441	-0.577733	-0.551007	-0.471227	0.390308	0.472275	0.496275	0.584311	-1
BANF1	deaf	nido	ncl	0.0517201	0.679291	-0.575851	0.0424237	-0.500321	-0.483564	-0.348194	0.363338	0.50766	0.552768	0.604384	-1
BANF1	deaf	ncl	nido	0.0517201	0.679291	-0.575851	0.0424237	-0.500321	-0.483564	-0.348194	0.363338	0.50766	0.552768	0.604384	-1
BAX	deaf	lman	ra	0.242272	-0.499108	-0.499108	0.0224589	-0.484895	-0.46869	-0.418396	0.456714	0.549035	0.569112	0.577304	-1
BAX	deaf	hvc	arco	0.331493	-0.568393	-0.568393	0.0245319	-0.600899	-0.56665	-0.494477	0.393876	0.476315	0.598549	0.652053	-1
BAX	deaf	arco	hvc	0.331493	-0.568393	-0.568393	0.0245319	-0.600899	-0.56665	-0.494477	0.393876	0.476315	0.598549	0.652053	-1
BAX	deaf	lman	hvc	0.330314	-0.444364	-0.444364	0.0632294	-0.504056	-0.428425	-0.340172	0.404335	0.476197	0.548253	0.614332	-1
BAX	deaf	ra	lman	0.242272	-0.499108	-0.499108	0.0224589	-0.484895	-0.46869	-0.418396	0.456714	0.549035	0.569112	0.577304	-1
BAX	deaf	hvc	lman	0.330314	-0.444364	-0.444364	0.0632294	-0.504056	-0.428425	-0.340172	0.404335	0.476197	0.548253	0.614332	-1
BAZ1A	deaf	x	nido	0.818714	0.960827	0.676601	0.020351	-0.427372	-0.415841	-0.397756	0.323944	0.441617	0.529199	0.609673	1
BAZ1A	deaf	nido	x	0.818714	0.960827	0.676601	0.020351	-0.427372	-0.415841	-0.397756	0.323944	0.441617	0.529199	0.609673	1
BBIP1	deaf	nido	ncl	0.00895541	0.509072	-0.491161	0.0020022	-0.624111	-0.483113	-0.446783	0.358494	0.441117	0.563805	0.65024	-1
BBIP1	deaf	ncl	nido	0.00895541	0.509072	-0.491161	0.0020022	-0.624111	-0.483113	-0.446783	0.358494	0.441117	0.563805	0.65024	-1
BBS2	deaf	hvc	ra	0.180859	0.915819	-0.554101	0.0340127	-0.434446	-0.403221	-0.351741	0.359842	0.436063	0.483665	0.51806	-1
BBS2	deaf	nido	ra	0.0512991	-0.664238	-0.664238	-0.016635	-0.592244	-0.552057	-0.469062	0.336183	0.445511	0.524191	0.564611	-1
BBS2	deaf	stri	ra	-0.00919896	-0.73797	-0.719572	-0.033886	-0.690703	-0.646474	-0.544606	0.345008	0.441933	0.630999	0.669175	-1
BBS2	deaf	lman	arco	0.0014623	-0.791956	-0.791956	-0.0190068	-0.537308	-0.523188	-0.464269	0.342072	0.399936	0.492621	0.517298	-1
BBS2	deaf	ra	hvc	0.180859	0.915819	-0.554101	0.0340127	-0.434446	-0.403221	-0.351741	0.359842	0.436063	0.483665	0.51806	-1
BBS2	deaf	arco	lman	0.0014623	-0.791956	-0.791956	-0.0190068	-0.537308	-0.523188	-0.464269	0.342072	0.399936	0.492621	0.517298	-1
BBS2	deaf	ra	nido	0.0512991	-0.664238	-0.664238	-0.016635	-0.592244	-0.552057	-0.469062	0.336183	0.445511	0.524191	0.564611	-1
BBS2	deaf	x	nido	0.037883	-0.761955	-0.761955	-0.0598292	-0.659275	-0.596384	-0.475907	0.321759	0.433105	0.483031	0.605912	-1
BBS2	deaf	nido	x	0.037883	-0.761955	-0.761955	-0.0598292	-0.659275	-0.596384	-0.475907	0.321759	0.433105	0.483031	0.605912	-1
BBS2	deaf	ra	stri	-0.00919896	-0.73797	-0.719572	-0.033886	-0.690703	-0.646474	-0.544606	0.345008	0.441933	0.630999	0.669175	-1
BBS4	deaf	hvc	ra	-0.0768789	-0.71655	-0.562792	0.0533315	-0.541585	-0.45385	-0.436592	0.414857	0.544292	0.690419	0.764344	-1
BBS4	deaf	ra	hvc	-0.0768789	-0.71655	-0.562792	0.0533315	-0.541585	-0.45385	-0.436592	0.414857	0.544292	0.690419	0.764344	-1
BBS4	deaf	ncl	hvc	-0.0983712	-0.801132	-0.60439	0.0483724	-0.730555	-0.584518	-0.384367	0.367607	0.451799	0.503436	0.607498	-1
BBS4	deaf	hvc	ncl	-0.0983712	-0.801132	-0.60439	0.0483724	-0.730555	-0.584518	-0.384367	0.367607	0.451799	0.503436	0.607498	-1
BCL9	deaf	stri	arco	-0.763161	-0.727581	0.727581	0.0147555	-0.460607	-0.434318	-0.402483	0.387953	0.48166	0.511194	0.549916	1
BCL9	deaf	x	lman	-0.575536	-0.638112	0.512959	0.0193323	-0.602024	-0.523343	-0.404757	0.363042	0.419378	0.505328	0.561651	1
BCL9	deaf	lman	x	-0.575536	-0.638112	0.512959	0.0193323	-0.602024	-0.523343	-0.404757	0.363042	0.419378	0.505328	0.561651	1
BCL9	deaf	stri	x	-0.970957	-0.717193	0.717193	-0.0307204	-0.559206	-0.517697	-0.455024	0.303512	0.456125	0.552449	0.609851	1
BCL9	deaf	arco	stri	-0.763161	-0.727581	0.727581	0.0147555	-0.460607	-0.434318	-0.402483	0.387953	0.48166	0.511194	0.549916	1
BCL9	deaf	x	stri	-0.970957	-0.717193	0.717193	-0.0307204	-0.559206	-0.517697	-0.455024	0.303512	0.456125	0.552449	0.609851	1
BDNF	deaf	x	hvc	0.650552	0.595877	0.595877	0.0393321	-0.6245	-0.532489	-0.372539	0.429338	0.535873	0.579348	0.655481	1
BDNF	deaf	hvc	x	0.650552	0.595877	0.595877	0.0393321	-0.6245	-0.532489	-0.372539	0.429338	0.535873	0.579348	0.655481	1
BEGAIN	deaf	hvc	ra	-0.112283	0.571119	-0.571119	0.0639827	-0.622302	-0.511885	-0.405105	0.399693	0.500768	0.52886	0.577247	-1
BEGAIN	deaf	stri	ra	-0.173914	-0.862111	-0.514283	0.026254	-0.570829	-0.488672	-0.413309	0.456138	0.499449	0.648187	0.707865	-1
BEGAIN	deaf	ra	hvc	-0.112283	0.571119	-0.571119	0.0639827	-0.622302	-0.511885	-0.405105	0.399693	0.500768	0.52886	0.577247	-1
BEGAIN	deaf	stri	nido	-0.0430356	-0.6059	-0.519829	-0.0203711	-0.557672	-0.515621	-0.467053	0.30194	0.36528	0.481242	0.538456	-1
BEGAIN	deaf	stri	x	-0.199021	-1.03085	-0.632803	0.010988	-0.600364	-0.579888	-0.483626	0.346745	0.493234	0.540604	0.613196	-1
BEGAIN	deaf	ra	stri	-0.173914	-0.862111	-0.514283	0.026254	-0.570829	-0.488672	-0.413309	0.456138	0.499449	0.648187	0.707865	-1
BEGAIN	deaf	nido	stri	-0.0430356	-0.6059	-0.519829	-0.0203711	-0.557672	-0.515621	-0.467053	0.30194	0.36528	0.481242	0.538456	-1
BEGAIN	deaf	x	stri	-0.199021	-1.03085	-0.632803	0.010988	-0.600364	-0.579888	-0.483626	0.346745	0.493234	0.540604	0.613196	-1
BEND3	deaf	arco	ra	0.12629	-0.479789	-0.479789	0.0418191	-0.511809	-0.474986	-0.433985	0.353585	0.40581	0.483598	0.529671	-1
BEND3	deaf	lman	ra	0.0631272	-0.56511	-0.56511	0.055792	-0.604856	-0.413818	-0.364543	0.367273	0.488364	0.538917	0.641117	-1
BEND3	deaf	ra	arco	0.12629	-0.479789	-0.479789	0.0418191	-0.511809	-0.474986	-0.433985	0.353585	0.40581	0.483598	0.529671	-1
BEND3	deaf	stri	arco	0.279286	-0.611104	-0.611104	0.0283265	-0.537503	-0.53082	-0.42585	0.445897	0.501366	0.543584	0.643651	-1
BEND3	deaf	ra	lman	0.0631272	-0.56511	-0.56511	0.055792	-0.604856	-0.413818	-0.364543	0.367273	0.488364	0.538917	0.641117	-1
BEND3	deaf	arco	stri	0.279286	-0.611104	-0.611104	0.0283265	-0.537503	-0.53082	-0.42585	0.445897	0.501366	0.543584	0.643651	-1
BMPER	deaf	ncl	ra	0.0279858	-0.730946	-0.730946	0.02088	-0.606445	-0.561725	-0.459633	0.386848	0.459272	0.532799	0.599972	-1
BMPER	deaf	x	arco	0.071421	0.697066	-0.554224	0.0569647	-0.649915	-0.526359	-0.386552	0.389367	0.468329	0.524179	0.570841	-1
BMPER	deaf	ra	ncl	0.0279858	-0.730946	-0.730946	0.02088	-0.606445	-0.561725	-0.459633	0.386848	0.459272	0.532799	0.599972	-1
BMPER	deaf	arco	x	0.071421	0.697066	-0.554224	0.0569647	-0.649915	-0.526359	-0.386552	0.389367	0.468329	0.524179	0.570841	-1
BNIP2	deaf	arco	ra	0.117954	-0.521054	-0.521054	0.00441972	-0.604331	-0.46416	-0.396842	0.352082	0.530397	0.592702	0.646882	-1
BNIP2	deaf	ra	arco	0.117954	-0.521054	-0.521054	0.00441972	-0.604331	-0.46416	-0.396842	0.352082	0.530397	0.592702	0.646882	-1
BNIP2	deaf	x	lman	0.74824	0.936942	0.559539	0.00147623	-0.622142	-0.570279	-0.509827	0.327351	0.380008	0.478169	0.49591	1
BNIP2	deaf	lman	x	0.74824	0.936942	0.559539	0.00147623	-0.622142	-0.570279	-0.509827	0.327351	0.380008	0.478169	0.49591	1
BOK	deaf	x	ncl	-0.0373717	-0.92525	-0.850506	-0.0378275	-0.684763	-0.559784	-0.416596	0.384382	0.504721	0.588619	0.66448	-1
BOK	deaf	x	nido	-0.223281	-1.14762	-0.701057	-0.024512	-0.793348	-0.676906	-0.488822	0.322945	0.37984	0.492145	0.530322	-1
BOK	deaf	stri	nido	0.109342	-0.608837	-0.608837	0.000229437	-0.552242	-0.515482	-0.426161	0.361815	0.451396	0.525486	0.609804	-1
BOK	deaf	ncl	x	-0.0373717	-0.92525	-0.850506	-0.0378275	-0.684763	-0.559784	-0.416596	0.384382	0.504721	0.588619	0.66448	-1
BOK	deaf	nido	x	-0.223281	-1.14762	-0.701057	-0.024512	-0.793348	-0.676906	-0.488822	0.322945	0.37984	0.492145	0.530322	-1
BOK	deaf	nido	stri	0.109342	-0.608837	-0.608837	0.000229437	-0.552242	-0.515482	-0.426161	0.361815	0.451396	0.525486	0.609804	-1
BRD8	deaf	ncl	ra	0.824803	0.8595	0.790106	0.0374057	-0.523212	-0.387327	-0.329629	0.392904	0.465289	0.56066	0.607726	1
BRD8	deaf	ra	ncl	0.824803	0.8595	0.790106	0.0374057	-0.523212	-0.387327	-0.329629	0.392904	0.465289	0.56066	0.607726	1
BRD8	deaf	x	ncl	0.154495	-0.503427	-0.503427	0.0645398	-0.518266	-0.431268	-0.3683	0.481279	0.542315	0.595053	0.617305	-1
BRD8	deaf	stri	nido	0.800503	0.452479	0.452479	-0.00273526	-0.490831	-0.460631	-0.425294	0.316893	0.430521	0.451192	0.511896	1
BRD8	deaf	ncl	x	0.154495	-0.503427	-0.503427	0.0645398	-0.518266	-0.431268	-0.3683	0.481279	0.542315	0.595053	0.617305	-1
BRD8	deaf	stri	x	0.03694	-0.748035	-0.748035	-0.0206285	-0.76976	-0.710074	-0.644709	0.334653	0.398953	0.471593	0.570999	-1
BRD8	deaf	nido	stri	0.800503	0.452479	0.452479	-0.00273526	-0.490831	-0.460631	-0.425294	0.316893	0.430521	0.451192	0.511896	1
BRD8	deaf	x	stri	0.03694	-0.748035	-0.748035	-0.0206285	-0.76976	-0.710074	-0.644709	0.334653	0.398953	0.471593	0.570999	-1
BRINP3	deaf	arco	ra	0.0144329	-0.58999	-0.58999	0.0134466	-0.561348	-0.372318	-0.345178	0.425311	0.477189	0.500128	0.638349	-1
BRINP3	deaf	nido	ra	-0.220024	-0.965374	-0.525326	-0.0279822	-0.560669	-0.506581	-0.458696	0.335982	0.442513	0.531648	0.539571	-1
BRINP3	deaf	ra	arco	0.0144329	-0.58999	-0.58999	0.0134466	-0.561348	-0.372318	-0.345178	0.425311	0.477189	0.500128	0.638349	-1
BRINP3	deaf	stri	hvc	-0.602085	-0.740298	0.463872	-0.00261309	-0.540812	-0.513541	-0.503887	0.30202	0.392603	0.415436	0.461909	1
BRINP3	deaf	ra	nido	-0.220024	-0.965374	-0.525326	-0.0279822	-0.560669	-0.506581	-0.458696	0.335982	0.442513	0.531648	0.539571	-1
BRINP3	deaf	hvc	stri	-0.602085	-0.740298	0.463872	-0.00261309	-0.540812	-0.513541	-0.503887	0.30202	0.392603	0.415436	0.461909	1
BRS3	deaf	x	lman	0.149771	0.950803	-0.65126	-0.0103729	-0.645134	-0.554707	-0.502574	0.289845	0.460726	0.527693	0.536274	-1
BRS3	deaf	lman	x	0.149771	0.950803	-0.65126	-0.0103729	-0.645134	-0.554707	-0.502574	0.289845	0.460726	0.527693	0.536274	-1
BRWD1	deaf	lman	ra	0.0657418	-0.717881	-0.717881	0.0785959	-0.408131	-0.390502	-0.353871	0.444696	0.549967	0.602949	0.607725	-1
BRWD1	deaf	ncl	hvc	-0.0157541	-0.654068	-0.62256	-0.0501429	-0.488539	-0.431437	-0.405435	0.304452	0.34832	0.426316	0.547558	-1
BRWD1	deaf	hvc	ncl	-0.0157541	-0.654068	-0.62256	-0.0501429	-0.488539	-0.431437	-0.405435	0.304452	0.34832	0.426316	0.547558	-1
BRWD1	deaf	ra	lman	0.0657418	-0.717881	-0.717881	0.0785959	-0.408131	-0.390502	-0.353871	0.444696	0.549967	0.602949	0.607725	-1
BRWD1	deaf	stri	lman	0.00490285	-0.567153	-0.567153	0.039049	-0.510547	-0.405314	-0.327462	0.319855	0.38195	0.45042	0.516775	-1
BRWD1	deaf	stri	nido	0.754669	0.508673	0.508673	-0.100871	-0.651446	-0.628952	-0.579	0.295283	0.387271	0.442615	0.464231	1
BRWD1	deaf	lman	stri	0.00490285	-0.567153	-0.567153	0.039049	-0.510547	-0.405314	-0.327462	0.319855	0.38195	0.45042	0.516775	-1
BRWD1	deaf	nido	stri	0.754669	0.508673	0.508673	-0.100871	-0.651446	-0.628952	-0.579	0.295283	0.387271	0.442615	0.464231	1
BSN	deaf	stri	arco	0.755013	0.636313	0.636313	-0.00983632	-0.849135	-0.715411	-0.536306	0.329107	0.36723	0.455748	0.516053	1
BSN	deaf	arco	stri	0.755013	0.636313	0.636313	-0.00983632	-0.849135	-0.715411	-0.536306	0.329107	0.36723	0.455748	0.516053	1
BTBD17	deaf	x	arco	0.718403	0.852417	0.584388	0.00232931	-0.54177	-0.5215	-0.443267	0.345122	0.437998	0.495139	0.55708	1
BTBD17	deaf	stri	hvc	0.622924	0.886698	0.359151	-0.0663824	-0.606527	-0.5837	-0.518886	0.210353	0.25848	0.318356	0.36328	1
BTBD17	deaf	x	ncl	-0.30151	-1.10338	-0.50036	0.0668817	-0.367749	-0.340945	-0.297486	0.401424	0.474517	0.496502	0.501711	-1
BTBD17	deaf	arco	x	0.718403	0.852417	0.584388	0.00232931	-0.54177	-0.5215	-0.443267	0.345122	0.437998	0.495139	0.55708	1
BTBD17	deaf	ncl	x	-0.30151	-1.10338	-0.50036	0.0668817	-0.367749	-0.340945	-0.297486	0.401424	0.474517	0.496502	0.501711	-1
BTBD17	deaf	hvc	stri	0.622924	0.886698	0.359151	-0.0663824	-0.606527	-0.5837	-0.518886	0.210353	0.25848	0.318356	0.36328	1
BTBD7	deaf	hvc	ra	-0.183279	0.586269	-0.586269	0.0512794	-0.527053	-0.432381	-0.340593	0.347934	0.518177	0.557959	0.566457	-1
BTBD7	deaf	ra	hvc	-0.183279	0.586269	-0.586269	0.0512794	-0.527053	-0.432381	-0.340593	0.347934	0.518177	0.557959	0.566457	-1
BTBD7	deaf	x	nido	-0.0776674	-0.729173	-0.573838	0.0383633	-0.488126	-0.457526	-0.358542	0.381361	0.467358	0.512772	0.556059	-1
BTBD7	deaf	nido	x	-0.0776674	-0.729173	-0.573838	0.0383633	-0.488126	-0.457526	-0.358542	0.381361	0.467358	0.512772	0.556059	-1
BTRC	deaf	hvc	ra	0.648394	0.782459	0.514328	0.0597389	-0.46999	-0.462629	-0.348001	0.406449	0.440189	0.466109	0.703219	1
BTRC	deaf	ncl	arco	-0.184099	-0.886992	-0.518794	0.0488494	-0.444377	-0.415297	-0.367499	0.417894	0.544894	0.636487	0.677646	-1
BTRC	deaf	ra	hvc	0.648394	0.782459	0.514328	0.0597389	-0.46999	-0.462629	-0.348001	0.406449	0.440189	0.466109	0.703219	1
BTRC	deaf	arco	ncl	-0.184099	-0.886992	-0.518794	0.0488494	-0.444377	-0.415297	-0.367499	0.417894	0.544894	0.636487	0.677646	-1
BTRC	deaf	x	nido	0.750878	0.532956	0.532956	-0.0168584	-0.567273	-0.543808	-0.54275	0.364293	0.416462	0.459682	0.535992	1
BTRC	deaf	nido	x	0.750878	0.532956	0.532956	-0.0168584	-0.567273	-0.543808	-0.54275	0.364293	0.416462	0.459682	0.535992	1
BXL5	deaf	arco	ra	0.0836777	-0.535927	-0.535927	-0.0103537	-0.572825	-0.518149	-0.396595	0.296309	0.350034	0.462525	0.604863	-1
BXL5	deaf	nido	ra	-0.105042	-0.9585	-0.748416	0.0346358	-0.475357	-0.461031	-0.399242	0.388175	0.448591	0.469029	0.526893	-1
BXL5	deaf	ra	arco	0.0836777	-0.535927	-0.535927	-0.0103537	-0.572825	-0.518149	-0.396595	0.296309	0.350034	0.462525	0.604863	-1
BXL5	deaf	ra	nido	-0.105042	-0.9585	-0.748416	0.0346358	-0.475357	-0.461031	-0.399242	0.388175	0.448591	0.469029	0.526893	-1
BYSL	deaf	lman	ra	0.124252	-0.441487	-0.441487	0.0870019	-0.47287	-0.392349	-0.303387	0.434339	0.467651	0.527736	0.536142	-1
BYSL	deaf	nido	ra	0.118076	-0.535088	-0.535088	-0.000448992	-0.58385	-0.523126	-0.371858	0.379607	0.468062	0.555479	0.582426	-1
BYSL	deaf	ra	lman	0.124252	-0.441487	-0.441487	0.0870019	-0.47287	-0.392349	-0.303387	0.434339	0.467651	0.527736	0.536142	-1
BYSL	deaf	ra	nido	0.118076	-0.535088	-0.535088	-0.000448992	-0.58385	-0.523126	-0.371858	0.379607	0.468062	0.555479	0.582426	-1
C1GALT1	deaf	nido	hvc	0.694714	0.673187	0.673187	0.0192653	-0.53646	-0.468845	-0.392832	0.360048	0.44131	0.531835	0.616692	1
C1GALT1	deaf	x	hvc	0.566894	0.518251	0.518251	-0.0601443	-0.663462	-0.551927	-0.507061	0.338965	0.395581	0.470103	0.506439	1
C1GALT1	deaf	stri	ncl	0.724704	0.620275	0.620275	0.00396518	-0.549242	-0.532711	-0.478048	0.425311	0.488738	0.59483	0.652073	1
C1GALT1	deaf	hvc	nido	0.694714	0.673187	0.673187	0.0192653	-0.53646	-0.468845	-0.392832	0.360048	0.44131	0.531835	0.616692	1
C1GALT1	deaf	x	nido	0.136586	-0.418576	-0.418576	0.0544678	-0.529348	-0.328039	-0.290292	0.367542	0.47354	0.513122	0.5275	-1
C1GALT1	deaf	hvc	x	0.566894	0.518251	0.518251	-0.0601443	-0.663462	-0.551927	-0.507061	0.338965	0.395581	0.470103	0.506439	1
C1GALT1	deaf	nido	x	0.136586	-0.418576	-0.418576	0.0544678	-0.529348	-0.328039	-0.290292	0.367542	0.47354	0.513122	0.5275	-1
C1GALT1	deaf	ncl	stri	0.724704	0.620275	0.620275	0.00396518	-0.549242	-0.532711	-0.478048	0.425311	0.488738	0.59483	0.652073	1
C1QL3	deaf	nido	ra	0.00237118	-0.476888	-0.476888	-0.0101036	-0.492294	-0.406041	-0.362555	0.316021	0.502628	0.564827	0.605968	-1
C1QL3	deaf	lman	arco	0.774145	0.839505	0.708785	-0.00818467	-0.47443	-0.444563	-0.386613	0.330149	0.392054	0.543545	0.570834	1
C1QL3	deaf	ncl	hvc	-0.0270444	-0.865126	-0.811037	-0.0426488	-0.552512	-0.516858	-0.498252	0.285815	0.404857	0.520763	0.598782	-1
C1QL3	deaf	hvc	ncl	-0.0270444	-0.865126	-0.811037	-0.0426488	-0.552512	-0.516858	-0.498252	0.285815	0.404857	0.520763	0.598782	-1
C1QL3	deaf	lman	ncl	0.109583	0.84458	-0.625413	0.118021	-0.663951	-0.577069	-0.416988	0.505451	0.588886	0.672789	0.701736	-1
C1QL3	deaf	arco	lman	0.774145	0.839505	0.708785	-0.00818467	-0.47443	-0.444563	-0.386613	0.330149	0.392054	0.543545	0.570834	1
C1QL3	deaf	ncl	lman	0.109583	0.84458	-0.625413	0.118021	-0.663951	-0.577069	-0.416988	0.505451	0.588886	0.672789	0.701736	-1
C1QL3	deaf	x	lman	0.0320764	-0.58191	-0.58191	-0.0126629	-0.532219	-0.491528	-0.42152	0.339032	0.416158	0.508668	0.53137	-1
C1QL3	deaf	ra	nido	0.00237118	-0.476888	-0.476888	-0.0101036	-0.492294	-0.406041	-0.362555	0.316021	0.502628	0.564827	0.605968	-1
C1QL3	deaf	lman	x	0.0320764	-0.58191	-0.58191	-0.0126629	-0.532219	-0.491528	-0.42152	0.339032	0.416158	0.508668	0.53137	-1
C4	deaf	arco	ra	0.03791	-0.770884	-0.770884	0.0104235	-0.503931	-0.473985	-0.457559	0.358636	0.529372	0.603278	0.635	-1
C4	deaf	hvc	ra	0.848498	0.622858	0.622858	-0.0509922	-0.56792	-0.546161	-0.476057	0.291429	0.414038	0.505864	0.586837	1
C4	deaf	ra	arco	0.03791	-0.770884	-0.770884	0.0104235	-0.503931	-0.473985	-0.457559	0.358636	0.529372	0.603278	0.635	-1
C4	deaf	ra	hvc	0.848498	0.622858	0.622858	-0.0509922	-0.56792	-0.546161	-0.476057	0.291429	0.414038	0.505864	0.586837	1
C4	deaf	lman	hvc	0.729824	0.61171	0.61171	0.000251569	-0.571147	-0.507205	-0.443994	0.372519	0.426347	0.564665	0.687137	1
C4	deaf	nido	hvc	0.0998183	-0.435849	-0.435849	0.088967	-0.3768	-0.363662	-0.323056	0.431886	0.559708	0.626536	0.646865	-1
C4	deaf	stri	ncl	-0.0605391	-0.643567	-0.522489	0.00480968	-0.59547	-0.472371	-0.442688	0.352627	0.463361	0.501413	0.538839	-1
C4	deaf	hvc	lman	0.729824	0.61171	0.61171	0.000251569	-0.571147	-0.507205	-0.443994	0.372519	0.426347	0.564665	0.687137	1
C4	deaf	stri	lman	-0.0362434	-0.677927	-0.60544	-0.0244389	-0.575306	-0.512539	-0.429002	0.322008	0.461185	0.499498	0.633808	-1
C4	deaf	hvc	nido	0.0998183	-0.435849	-0.435849	0.088967	-0.3768	-0.363662	-0.323056	0.431886	0.559708	0.626536	0.646865	-1
C4	deaf	ncl	stri	-0.0605391	-0.643567	-0.522489	0.00480968	-0.59547	-0.472371	-0.442688	0.352627	0.463361	0.501413	0.538839	-1
C4	deaf	lman	stri	-0.0362434	-0.677927	-0.60544	-0.0244389	-0.575306	-0.512539	-0.429002	0.322008	0.461185	0.499498	0.633808	-1
CA10	deaf	ncl	hvc	0.681444	0.519994	0.519994	0.0238094	-0.5451	-0.512789	-0.433539	0.358374	0.434182	0.49673	0.532398	1
CA10	deaf	nido	hvc	0.7586	0.624266	0.624266	0.00977499	-0.619094	-0.547881	-0.462749	0.374463	0.488337	0.535425	0.589736	1
CA10	deaf	hvc	ncl	0.681444	0.519994	0.519994	0.0238094	-0.5451	-0.512789	-0.433539	0.358374	0.434182	0.49673	0.532398	1
CA10	deaf	hvc	nido	0.7586	0.624266	0.624266	0.00977499	-0.619094	-0.547881	-0.462749	0.374463	0.488337	0.535425	0.589736	1
CA15	deaf	lman	ra	-0.205035	-1.03507	-0.625001	0.0211607	-0.643777	-0.618424	-0.542151	0.373005	0.429146	0.503011	0.5679	-1
CA15	deaf	ra	lman	-0.205035	-1.03507	-0.625001	0.0211607	-0.643777	-0.618424	-0.542151	0.373005	0.429146	0.503011	0.5679	-1
CA2	deaf	nido	arco	0.133451	-0.568415	-0.568415	0.0150091	-0.518144	-0.440301	-0.374574	0.412463	0.496023	0.684491	0.775705	-1
CA2	deaf	lman	ncl	0.637586	0.716594	0.558578	-0.0212924	-0.748688	-0.612909	-0.513414	0.309991	0.379918	0.428612	0.601434	1
CA2	deaf	ncl	lman	0.637586	0.716594	0.558578	-0.0212924	-0.748688	-0.612909	-0.513414	0.309991	0.379918	0.428612	0.601434	1
CA2	deaf	arco	nido	0.133451	-0.568415	-0.568415	0.0150091	-0.518144	-0.440301	-0.374574	0.412463	0.496023	0.684491	0.775705	-1
CA2	deaf	x	nido	0.153895	-0.600252	-0.600252	-0.00568179	-0.521731	-0.475282	-0.456896	0.283805	0.476091	0.510893	0.539178	-1
CA2	deaf	nido	x	0.153895	-0.600252	-0.600252	-0.00568179	-0.521731	-0.475282	-0.456896	0.283805	0.476091	0.510893	0.539178	-1
CA5A	deaf	ncl	ra	0.129146	-0.546832	-0.546832	-0.0365076	-0.621395	-0.523507	-0.464951	0.315629	0.420131	0.57165	0.620658	-1
CA5A	deaf	ra	ncl	0.129146	-0.546832	-0.546832	-0.0365076	-0.621395	-0.523507	-0.464951	0.315629	0.420131	0.57165	0.620658	-1
CA5A	deaf	nido	lman	0.0756141	-0.799395	-0.799395	0.0379514	-0.546162	-0.511385	-0.402135	0.392627	0.472671	0.51367	0.611202	-1
CA5A	deaf	lman	nido	0.0756141	-0.799395	-0.799395	0.0379514	-0.546162	-0.511385	-0.402135	0.392627	0.472671	0.51367	0.611202	-1
CA7	deaf	nido	lman	-0.0661869	-0.693567	-0.561193	0.0101074	-0.544147	-0.489568	-0.428981	0.417523	0.479439	0.609239	0.661033	-1
CA7	deaf	lman	nido	-0.0661869	-0.693567	-0.561193	0.0101074	-0.544147	-0.489568	-0.428981	0.417523	0.479439	0.609239	0.661033	-1
CA8	deaf	arco	ra	0.562243	0.640624	0.483861	-0.0396484	-0.572665	-0.531032	-0.469644	0.263924	0.362481	0.426703	0.521065	1
CA8	deaf	ra	arco	0.562243	0.640624	0.483861	-0.0396484	-0.572665	-0.531032	-0.469644	0.263924	0.362481	0.426703	0.521065	1
CA8	deaf	lman	arco	0.625247	0.624535	0.624535	0.0127685	-0.727102	-0.556716	-0.45845	0.397425	0.464832	0.525904	0.658353	1
CA8	deaf	arco	lman	0.625247	0.624535	0.624535	0.0127685	-0.727102	-0.556716	-0.45845	0.397425	0.464832	0.525904	0.658353	1
CACNA1G	deaf	stri	arco	0.0343328	-0.691312	-0.691312	0.0630295	-0.588708	-0.473662	-0.399071	0.428891	0.477421	0.548607	0.57919	-1
CACNA1G	deaf	nido	hvc	-0.000687164	-0.554169	-0.552795	0.0387069	-0.494262	-0.444055	-0.331363	0.398644	0.436358	0.580695	0.622715	-1
CACNA1G	deaf	x	ncl	-0.147006	-0.83309	-0.539078	0.00423353	-0.500654	-0.490861	-0.472024	0.363147	0.395301	0.426594	0.448969	-1
CACNA1G	deaf	hvc	nido	-0.000687164	-0.554169	-0.552795	0.0387069	-0.494262	-0.444055	-0.331363	0.398644	0.436358	0.580695	0.622715	-1
CACNA1G	deaf	ncl	x	-0.147006	-0.83309	-0.539078	0.00423353	-0.500654	-0.490861	-0.472024	0.363147	0.395301	0.426594	0.448969	-1
CACNA1G	deaf	arco	stri	0.0343328	-0.691312	-0.691312	0.0630295	-0.588708	-0.473662	-0.399071	0.428891	0.477421	0.548607	0.57919	-1
CACNA2D3	deaf	nido	ra	-0.688449	-0.722841	0.654058	-0.0205103	-0.616049	-0.572736	-0.407514	0.34157	0.483956	0.511393	0.521544	1
CACNA2D3	deaf	hvc	arco	-0.758037	-0.68608	0.68608	0.0494973	-0.628609	-0.513451	-0.332108	0.417322	0.502204	0.535601	0.641647	1
CACNA2D3	deaf	arco	hvc	-0.758037	-0.68608	0.68608	0.0494973	-0.628609	-0.513451	-0.332108	0.417322	0.502204	0.535601	0.641647	1
CACNA2D3	deaf	x	hvc	0.852399	0.688222	0.688222	-0.0220327	-0.675567	-0.606005	-0.399758	0.399267	0.529431	0.583201	0.656885	1
CACNA2D3	deaf	ra	nido	-0.688449	-0.722841	0.654058	-0.0205103	-0.616049	-0.572736	-0.407514	0.34157	0.483956	0.511393	0.521544	1
CACNA2D3	deaf	hvc	x	0.852399	0.688222	0.688222	-0.0220327	-0.675567	-0.606005	-0.399758	0.399267	0.529431	0.583201	0.656885	1
CACNG4	deaf	hvc	ra	0.794981	0.554985	0.554985	0.046983	-0.510089	-0.4367	-0.344762	0.365504	0.422693	0.524404	0.569681	1
CACNG4	deaf	x	ra	0.676838	0.655283	0.655283	-0.0156011	-0.684097	-0.624886	-0.444932	0.378734	0.4716	0.550278	0.58426	1
CACNG4	deaf	ra	hvc	0.794981	0.554985	0.554985	0.046983	-0.510089	-0.4367	-0.344762	0.365504	0.422693	0.524404	0.569681	1
CACNG4	deaf	nido	hvc	0.1489	-0.670443	-0.670443	0.073742	-0.502539	-0.385821	-0.301229	0.406559	0.539198	0.609617	0.74471	-1
CACNG4	deaf	hvc	nido	0.1489	-0.670443	-0.670443	0.073742	-0.502539	-0.385821	-0.301229	0.406559	0.539198	0.609617	0.74471	-1
CACNG4	deaf	ra	x	0.676838	0.655283	0.655283	-0.0156011	-0.684097	-0.624886	-0.444932	0.378734	0.4716	0.550278	0.58426	1
CACNG5	deaf	arco	ra	0.123952	-0.461861	-0.461861	0.0543047	-0.535051	-0.455901	-0.397067	0.44784	0.497395	0.544581	0.667258	-1
CACNG5	deaf	x	ra	0.867646	0.968313	0.76698	0.013366	-0.534269	-0.524628	-0.469367	0.399906	0.496963	0.517444	0.528474	1
CACNG5	deaf	ra	arco	0.123952	-0.461861	-0.461861	0.0543047	-0.535051	-0.455901	-0.397067	0.44784	0.497395	0.544581	0.667258	-1
CACNG5	deaf	stri	arco	0.750268	0.772887	0.727649	0.00185942	-0.589279	-0.55052	-0.469086	0.38588	0.450035	0.485092	0.528687	1
CACNG5	deaf	ncl	hvc	0.846744	0.558709	0.558709	-0.0395886	-0.5999	-0.498887	-0.482942	0.363752	0.481597	0.549213	0.587272	1
CACNG5	deaf	hvc	ncl	0.846744	0.558709	0.558709	-0.0395886	-0.5999	-0.498887	-0.482942	0.363752	0.481597	0.549213	0.587272	1
CACNG5	deaf	nido	ncl	0.559287	0.596862	0.521713	-0.0305277	-0.559985	-0.520923	-0.492179	0.26185	0.386653	0.437182	0.489825	1
CACNG5	deaf	stri	ncl	0.537559	0.507431	0.507431	0.0392324	-0.460407	-0.453977	-0.370131	0.390662	0.464757	0.498412	0.57398	1
CACNG5	deaf	ncl	nido	0.559287	0.596862	0.521713	-0.0305277	-0.559985	-0.520923	-0.492179	0.26185	0.386653	0.437182	0.489825	1
CACNG5	deaf	ra	x	0.867646	0.968313	0.76698	0.013366	-0.534269	-0.524628	-0.469367	0.399906	0.496963	0.517444	0.528474	1
CACNG5	deaf	arco	stri	0.750268	0.772887	0.727649	0.00185942	-0.589279	-0.55052	-0.469086	0.38588	0.450035	0.485092	0.528687	1
CACNG5	deaf	ncl	stri	0.537559	0.507431	0.507431	0.0392324	-0.460407	-0.453977	-0.370131	0.390662	0.464757	0.498412	0.57398	1
CALCRL	deaf	lman	hvc	-0.627518	-0.725559	0.529477	-0.068294	-0.674459	-0.638186	-0.585074	0.2397	0.390794	0.489109	0.539695	1
CALCRL	deaf	hvc	lman	-0.627518	-0.725559	0.529477	-0.068294	-0.674459	-0.638186	-0.585074	0.2397	0.390794	0.489109	0.539695	1
CALR	deaf	x	hvc	0.653243	0.782546	0.523939	-0.0152117	-0.483897	-0.468179	-0.441853	0.376712	0.427162	0.464887	0.471745	1
CALR	deaf	nido	lman	0.445917	-0.494378	-0.494378	-0.0167963	-0.489651	-0.484898	-0.454126	0.369249	0.499262	0.58998	0.653379	-1
CALR	deaf	lman	nido	0.445917	-0.494378	-0.494378	-0.0167963	-0.489651	-0.484898	-0.454126	0.369249	0.499262	0.58998	0.653379	-1
CALR	deaf	hvc	x	0.653243	0.782546	0.523939	-0.0152117	-0.483897	-0.468179	-0.441853	0.376712	0.427162	0.464887	0.471745	1
CAMK1	deaf	stri	arco	0.553096	0.491496	0.491496	0.0290795	-0.567857	-0.446989	-0.399577	0.370568	0.435275	0.472805	0.498674	1
CAMK1	deaf	lman	ncl	0.600026	0.697583	0.50247	-0.0696509	-0.631666	-0.556441	-0.534949	0.280503	0.336931	0.471716	0.590731	1
CAMK1	deaf	ncl	lman	0.600026	0.697583	0.50247	-0.0696509	-0.631666	-0.556441	-0.534949	0.280503	0.336931	0.471716	0.590731	1
CAMK1	deaf	arco	stri	0.553096	0.491496	0.491496	0.0290795	-0.567857	-0.446989	-0.399577	0.370568	0.435275	0.472805	0.498674	1
CAMK1G	deaf	ncl	hvc	-0.847387	-1.04116	0.653616	-0.0520956	-0.660856	-0.613082	-0.480511	0.335531	0.402508	0.480749	0.647903	1
CAMK1G	deaf	hvc	ncl	-0.847387	-1.04116	0.653616	-0.0520956	-0.660856	-0.613082	-0.480511	0.335531	0.402508	0.480749	0.647903	1
CAMK2G	deaf	x	arco	0.562872	0.619719	0.506025	-0.0173673	-0.692679	-0.64775	-0.567373	0.316724	0.427346	0.503707	0.594862	1
CAMK2G	deaf	lman	ncl	0.69034	0.554006	0.554006	-0.0663696	-0.653061	-0.647481	-0.636909	0.382621	0.448536	0.531559	0.598291	1
CAMK2G	deaf	x	ncl	0.781147	0.855825	0.706469	-0.04008	-0.638271	-0.564871	-0.487469	0.296756	0.384007	0.502575	0.553996	1
CAMK2G	deaf	ncl	lman	0.69034	0.554006	0.554006	-0.0663696	-0.653061	-0.647481	-0.636909	0.382621	0.448536	0.531559	0.598291	1
CAMK2G	deaf	arco	x	0.562872	0.619719	0.506025	-0.0173673	-0.692679	-0.64775	-0.567373	0.316724	0.427346	0.503707	0.594862	1
CAMK2G	deaf	ncl	x	0.781147	0.855825	0.706469	-0.04008	-0.638271	-0.564871	-0.487469	0.296756	0.384007	0.502575	0.553996	1
CANT1	deaf	stri	x	0.939621	0.959875	0.919367	-0.0194752	-0.609495	-0.559967	-0.492519	0.341515	0.42915	0.502176	0.562754	1
CANT1	deaf	x	stri	0.939621	0.959875	0.919367	-0.0194752	-0.609495	-0.559967	-0.492519	0.341515	0.42915	0.502176	0.562754	1
CAPN10	deaf	arco	ra	0.557413	0.439641	0.439641	-0.0548485	-0.645291	-0.615538	-0.569148	0.275902	0.363874	0.414425	0.699542	1
CAPN10	deaf	ra	arco	0.557413	0.439641	0.439641	-0.0548485	-0.645291	-0.615538	-0.569148	0.275902	0.363874	0.414425	0.699542	1
CAPN10	deaf	nido	hvc	-0.64685	-0.704404	0.589297	0.013116	-0.551084	-0.526395	-0.49674	0.426192	0.52975	0.573809	0.658773	1
CAPN10	deaf	lman	ncl	-0.808571	-0.788727	0.788727	0.046848	-0.577443	-0.511447	-0.397126	0.399622	0.481129	0.60339	0.63895	1
CAPN10	deaf	ncl	lman	-0.808571	-0.788727	0.788727	0.046848	-0.577443	-0.511447	-0.397126	0.399622	0.481129	0.60339	0.63895	1
CAPN10	deaf	hvc	nido	-0.64685	-0.704404	0.589297	0.013116	-0.551084	-0.526395	-0.49674	0.426192	0.52975	0.573809	0.658773	1
CARHSP1	deaf	nido	ra	0.708418	0.720918	0.695918	-0.0570821	-0.634718	-0.595389	-0.55228	0.39289	0.487686	0.521904	0.544245	1
CARHSP1	deaf	nido	arco	0.762564	0.645117	0.645117	-0.00802959	-0.728412	-0.567064	-0.522948	0.409013	0.468091	0.555124	0.749372	1
CARHSP1	deaf	lman	hvc	-0.572862	-0.707772	0.437951	-0.0465514	-0.743389	-0.664438	-0.519276	0.29012	0.360432	0.414816	0.522321	1
CARHSP1	deaf	nido	ncl	0.577268	0.631486	0.523051	0.0192925	-0.593437	-0.510329	-0.423142	0.312616	0.427982	0.502397	0.537759	1
CARHSP1	deaf	hvc	lman	-0.572862	-0.707772	0.437951	-0.0465514	-0.743389	-0.664438	-0.519276	0.29012	0.360432	0.414816	0.522321	1
CARHSP1	deaf	ra	nido	0.708418	0.720918	0.695918	-0.0570821	-0.634718	-0.595389	-0.55228	0.39289	0.487686	0.521904	0.544245	1
CARHSP1	deaf	arco	nido	0.762564	0.645117	0.645117	-0.00802959	-0.728412	-0.567064	-0.522948	0.409013	0.468091	0.555124	0.749372	1
CARHSP1	deaf	ncl	nido	0.577268	0.631486	0.523051	0.0192925	-0.593437	-0.510329	-0.423142	0.312616	0.427982	0.502397	0.537759	1
CARM1	deaf	ncl	hvc	-0.627968	-0.579904	0.579904	-0.0185587	-0.601495	-0.533325	-0.460499	0.423565	0.502513	0.557976	0.63571	1
CARM1	deaf	nido	hvc	0.723574	0.558747	0.558747	-0.0210538	-0.537365	-0.513788	-0.428726	0.358462	0.465032	0.531951	0.588749	1
CARM1	deaf	hvc	ncl	-0.627968	-0.579904	0.579904	-0.0185587	-0.601495	-0.533325	-0.460499	0.423565	0.502513	0.557976	0.63571	1
CARM1	deaf	hvc	nido	0.723574	0.558747	0.558747	-0.0210538	-0.537365	-0.513788	-0.428726	0.358462	0.465032	0.531951	0.588749	1
CASD1	deaf	x	ncl	-0.783491	-0.890745	0.676237	-0.0443126	-0.609196	-0.598151	-0.566461	0.284659	0.405974	0.474603	0.550297	1
CASD1	deaf	nido	lman	0.0203102	-0.569463	-0.569463	-0.0161457	-0.781325	-0.537799	-0.470074	0.366175	0.38521	0.436134	0.49019	-1
CASD1	deaf	lman	nido	0.0203102	-0.569463	-0.569463	-0.0161457	-0.781325	-0.537799	-0.470074	0.366175	0.38521	0.436134	0.49019	-1
CASD1	deaf	stri	nido	0.0652144	0.550293	-0.419864	0.0127337	-0.436346	-0.416594	-0.36971	0.335286	0.429727	0.622266	0.673936	-1
CASD1	deaf	ncl	x	-0.783491	-0.890745	0.676237	-0.0443126	-0.609196	-0.598151	-0.566461	0.284659	0.405974	0.474603	0.550297	1
CASD1	deaf	nido	stri	0.0652144	0.550293	-0.419864	0.0127337	-0.436346	-0.416594	-0.36971	0.335286	0.429727	0.622266	0.673936	-1
CAST	deaf	ncl	ra	-0.647744	-0.580979	0.580979	-0.0103833	-0.624231	-0.590994	-0.51514	0.346759	0.364851	0.500867	0.568831	1
CAST	deaf	stri	hvc	0.890628	1.02484	0.756415	0.0307058	-0.62131	-0.535929	-0.44511	0.38559	0.473801	0.58885	0.658813	1
CAST	deaf	ra	ncl	-0.647744	-0.580979	0.580979	-0.0103833	-0.624231	-0.590994	-0.51514	0.346759	0.364851	0.500867	0.568831	1
CAST	deaf	x	ncl	-0.838644	-0.759598	0.759598	0.0181527	-0.499543	-0.451865	-0.44062	0.460685	0.547143	0.656451	0.744682	1
CAST	deaf	stri	ncl	-0.000687178	0.470795	-0.470795	0.0468382	-0.462851	-0.461952	-0.43787	0.421281	0.471494	0.52307	0.561203	-1
CAST	deaf	ncl	x	-0.838644	-0.759598	0.759598	0.0181527	-0.499543	-0.451865	-0.44062	0.460685	0.547143	0.656451	0.744682	1
CAST	deaf	hvc	stri	0.890628	1.02484	0.756415	0.0307058	-0.62131	-0.535929	-0.44511	0.38559	0.473801	0.58885	0.658813	1
CAST	deaf	ncl	stri	-0.000687178	0.470795	-0.470795	0.0468382	-0.462851	-0.461952	-0.43787	0.421281	0.471494	0.52307	0.561203	-1
CBFA2T3	deaf	lman	ncl	0.63412	0.50444	0.50444	0.000413633	-0.574118	-0.46662	-0.410077	0.314462	0.399264	0.424295	0.46221	1
CBFA2T3	deaf	ncl	lman	0.63412	0.50444	0.50444	0.000413633	-0.574118	-0.46662	-0.410077	0.314462	0.399264	0.424295	0.46221	1
CBFA2T3	deaf	x	lman	-0.00359255	-0.546442	-0.539257	-0.0378163	-0.563127	-0.500259	-0.451714	0.330743	0.38485	0.463521	0.56955	-1
CBFA2T3	deaf	lman	x	-0.00359255	-0.546442	-0.539257	-0.0378163	-0.563127	-0.500259	-0.451714	0.330743	0.38485	0.463521	0.56955	-1
CBL	deaf	x	lman	0.0616021	-0.460438	-0.460438	0.0381624	-0.583138	-0.452728	-0.364493	0.347349	0.365643	0.497373	0.501964	-1
CBL	deaf	lman	x	0.0616021	-0.460438	-0.460438	0.0381624	-0.583138	-0.452728	-0.364493	0.347349	0.365643	0.497373	0.501964	-1
CC2D1B	deaf	lman	hvc	-0.625227	-0.599582	0.599582	0.0127709	-0.634364	-0.622104	-0.459694	0.338028	0.466358	0.501444	0.564898	1
CC2D1B	deaf	hvc	lman	-0.625227	-0.599582	0.599582	0.0127709	-0.634364	-0.622104	-0.459694	0.338028	0.466358	0.501444	0.564898	1
CCDC12	deaf	lman	hvc	-0.761383	-0.9444	0.578365	-0.049187	-0.599975	-0.582016	-0.525507	0.314557	0.345373	0.529536	0.620036	1
CCDC12	deaf	hvc	lman	-0.761383	-0.9444	0.578365	-0.049187	-0.599975	-0.582016	-0.525507	0.314557	0.345373	0.529536	0.620036	1
CCDC12	deaf	nido	lman	-0.0698423	-0.737377	-0.597693	-0.0388777	-0.688093	-0.539924	-0.490702	0.347013	0.457458	0.54375	0.57447	-1
CCDC12	deaf	lman	nido	-0.0698423	-0.737377	-0.597693	-0.0388777	-0.688093	-0.539924	-0.490702	0.347013	0.457458	0.54375	0.57447	-1
CCDC177	deaf	arco	ra	0.0249868	-0.673379	-0.673379	-0.0658992	-0.599978	-0.533266	-0.487982	0.222498	0.408425	0.511512	0.637034	-1
CCDC177	deaf	ra	arco	0.0249868	-0.673379	-0.673379	-0.0658992	-0.599978	-0.533266	-0.487982	0.222498	0.408425	0.511512	0.637034	-1
CCDC177	deaf	nido	ncl	0.112695	1.02068	-0.795289	0.0235323	-0.509538	-0.393048	-0.346975	0.376388	0.470914	0.58282	0.658082	-1
CCDC177	deaf	stri	ncl	-0.629072	-0.748567	0.509578	-0.0325492	-0.563566	-0.550789	-0.453314	0.276994	0.35899	0.501513	0.541975	1
CCDC177	deaf	ncl	nido	0.112695	1.02068	-0.795289	0.0235323	-0.509538	-0.393048	-0.346975	0.376388	0.470914	0.58282	0.658082	-1
CCDC177	deaf	stri	x	0.594652	0.53476	0.53476	-0.0887754	-0.704022	-0.668189	-0.572581	0.381267	0.464726	0.526063	0.547325	1
CCDC177	deaf	ncl	stri	-0.629072	-0.748567	0.509578	-0.0325492	-0.563566	-0.550789	-0.453314	0.276994	0.35899	0.501513	0.541975	1
CCDC177	deaf	x	stri	0.594652	0.53476	0.53476	-0.0887754	-0.704022	-0.668189	-0.572581	0.381267	0.464726	0.526063	0.547325	1
CCDC34	deaf	ncl	hvc	0.773029	0.519285	0.519285	-0.00935482	-0.606597	-0.495073	-0.436933	0.305883	0.350756	0.432363	0.558676	1
CCDC34	deaf	hvc	ncl	0.773029	0.519285	0.519285	-0.00935482	-0.606597	-0.495073	-0.436933	0.305883	0.350756	0.432363	0.558676	1
CCDC34	deaf	lman	ncl	0.60332	0.531029	0.531029	-0.00803286	-0.610572	-0.557943	-0.501783	0.335568	0.447598	0.521134	0.561706	1
CCDC34	deaf	ncl	lman	0.60332	0.531029	0.531029	-0.00803286	-0.610572	-0.557943	-0.501783	0.335568	0.447598	0.521134	0.561706	1
CCDC34	deaf	nido	lman	0.272572	-0.520113	-0.520113	0.0278578	-0.587539	-0.39985	-0.334692	0.406742	0.485941	0.521371	0.571647	-1
CCDC34	deaf	lman	nido	0.272572	-0.520113	-0.520113	0.0278578	-0.587539	-0.39985	-0.334692	0.406742	0.485941	0.521371	0.571647	-1
CCNG1	deaf	arco	ra	0.640446	0.573051	0.573051	-0.0455039	-0.638086	-0.584925	-0.536441	0.264815	0.435252	0.511969	0.584016	1
CCNG1	deaf	hvc	ra	0.53117	0.502775	0.502775	-0.00245586	-0.554819	-0.527637	-0.515976	0.367107	0.455812	0.484015	0.519694	1
CCNG1	deaf	ra	arco	0.640446	0.573051	0.573051	-0.0455039	-0.638086	-0.584925	-0.536441	0.264815	0.435252	0.511969	0.584016	1
CCNG1	deaf	stri	arco	-0.00238388	-0.868709	-0.863941	-0.0224621	-0.678047	-0.617803	-0.531613	0.329132	0.403378	0.474228	0.594522	-1
CCNG1	deaf	ra	hvc	0.53117	0.502775	0.502775	-0.00245586	-0.554819	-0.527637	-0.515976	0.367107	0.455812	0.484015	0.519694	1
CCNG1	deaf	x	hvc	-0.00739386	0.478344	-0.478344	0.0272143	-0.438942	-0.390373	-0.341416	0.32596	0.46483	0.54256	0.638054	-1
CCNG1	deaf	x	nido	0.577392	0.623992	0.530792	-0.0465367	-0.595818	-0.577979	-0.517079	0.29989	0.383911	0.477316	0.503533	1
CCNG1	deaf	hvc	x	-0.00739386	0.478344	-0.478344	0.0272143	-0.438942	-0.390373	-0.341416	0.32596	0.46483	0.54256	0.638054	-1
CCNG1	deaf	nido	x	0.577392	0.623992	0.530792	-0.0465367	-0.595818	-0.577979	-0.517079	0.29989	0.383911	0.477316	0.503533	1
CCNG1	deaf	arco	stri	-0.00238388	-0.868709	-0.863941	-0.0224621	-0.678047	-0.617803	-0.531613	0.329132	0.403378	0.474228	0.594522	-1
CCNT2	deaf	ncl	ra	0.0832932	-0.608511	-0.608511	0.0387323	-0.621901	-0.601395	-0.530154	0.389359	0.520679	0.56141	0.57561	-1
CCNT2	deaf	x	ra	0.636434	0.581476	0.581476	-0.048025	-0.60506	-0.547361	-0.491608	0.334251	0.432608	0.519222	0.536334	1
CCNT2	deaf	ra	ncl	0.0832932	-0.608511	-0.608511	0.0387323	-0.621901	-0.601395	-0.530154	0.389359	0.520679	0.56141	0.57561	-1
CCNT2	deaf	x	lman	0.644825	0.769096	0.520554	-0.0386136	-0.483043	-0.459302	-0.441025	0.309997	0.429706	0.501386	0.571306	1
CCNT2	deaf	ra	x	0.636434	0.581476	0.581476	-0.048025	-0.60506	-0.547361	-0.491608	0.334251	0.432608	0.519222	0.536334	1
CCNT2	deaf	lman	x	0.644825	0.769096	0.520554	-0.0386136	-0.483043	-0.459302	-0.441025	0.309997	0.429706	0.501386	0.571306	1
CD164L2	deaf	nido	ra	-0.40881	-1.26535	-0.447729	0.0422237	-0.420765	-0.406462	-0.377557	0.367212	0.46413	0.490677	0.676154	-1
CD164L2	deaf	nido	lman	0.215946	-0.595949	-0.595949	0.0397663	-0.499459	-0.445583	-0.404268	0.477793	0.595909	0.681858	0.731205	-1
CD164L2	deaf	ra	nido	-0.40881	-1.26535	-0.447729	0.0422237	-0.420765	-0.406462	-0.377557	0.367212	0.46413	0.490677	0.676154	-1
CD164L2	deaf	lman	nido	0.215946	-0.595949	-0.595949	0.0397663	-0.499459	-0.445583	-0.404268	0.477793	0.595909	0.681858	0.731205	-1
CD37	deaf	nido	ra	-0.0637103	-0.782765	-0.655345	0.0425884	-0.621095	-0.559697	-0.419929	0.418016	0.464126	0.492395	0.621121	-1
CD37	deaf	x	arco	0.700063	0.758616	0.641509	0.0229667	-0.514734	-0.506855	-0.388523	0.444344	0.513869	0.544342	0.616276	1
CD37	deaf	nido	ncl	-0.602639	-0.522497	0.522497	0.00180548	-0.585271	-0.572491	-0.554321	0.364053	0.439406	0.458137	0.49891	1
CD37	deaf	stri	lman	0.748754	0.792826	0.704681	0.00962965	-0.609284	-0.526946	-0.51311	0.351218	0.470444	0.529809	0.545361	1
CD37	deaf	ra	nido	-0.0637103	-0.782765	-0.655345	0.0425884	-0.621095	-0.559697	-0.419929	0.418016	0.464126	0.492395	0.621121	-1
CD37	deaf	ncl	nido	-0.602639	-0.522497	0.522497	0.00180548	-0.585271	-0.572491	-0.554321	0.364053	0.439406	0.458137	0.49891	1
CD37	deaf	arco	x	0.700063	0.758616	0.641509	0.0229667	-0.514734	-0.506855	-0.388523	0.444344	0.513869	0.544342	0.616276	1
CD37	deaf	lman	stri	0.748754	0.792826	0.704681	0.00962965	-0.609284	-0.526946	-0.51311	0.351218	0.470444	0.529809	0.545361	1
CD38	deaf	ncl	ra	0.0700978	-0.606725	-0.606725	0.0474804	-0.450776	-0.423662	-0.33863	0.345898	0.460105	0.51274	0.529549	-1
CD38	deaf	nido	ra	-0.101932	-0.792105	-0.588241	-0.0510078	-0.607855	-0.49129	-0.458948	0.320578	0.433757	0.506636	0.521134	-1
CD38	deaf	stri	ra	-0.0873962	-0.85772	-0.682928	-0.00726671	-0.54579	-0.525441	-0.497659	0.362914	0.397517	0.506274	0.617583	-1
CD38	deaf	stri	hvc	-0.0130846	-0.65688	-0.630711	0.0412505	-0.723743	-0.599864	-0.452055	0.422906	0.494422	0.59699	0.614596	-1
CD38	deaf	ra	ncl	0.0700978	-0.606725	-0.606725	0.0474804	-0.450776	-0.423662	-0.33863	0.345898	0.460105	0.51274	0.529549	-1
CD38	deaf	x	ncl	-0.0171318	-0.891621	-0.857358	-0.0187267	-0.6709	-0.557417	-0.522178	0.377579	0.481446	0.540666	0.698077	-1
CD38	deaf	nido	lman	0.0390475	-0.473272	-0.473272	0.015966	-0.494174	-0.435964	-0.361143	0.307634	0.438489	0.504861	0.565568	-1
CD38	deaf	ra	nido	-0.101932	-0.792105	-0.588241	-0.0510078	-0.607855	-0.49129	-0.458948	0.320578	0.433757	0.506636	0.521134	-1
CD38	deaf	lman	nido	0.0390475	-0.473272	-0.473272	0.015966	-0.494174	-0.435964	-0.361143	0.307634	0.438489	0.504861	0.565568	-1
CD38	deaf	ncl	x	-0.0171318	-0.891621	-0.857358	-0.0187267	-0.6709	-0.557417	-0.522178	0.377579	0.481446	0.540666	0.698077	-1
CD38	deaf	ra	stri	-0.0873962	-0.85772	-0.682928	-0.00726671	-0.54579	-0.525441	-0.497659	0.362914	0.397517	0.506274	0.617583	-1
CD38	deaf	hvc	stri	-0.0130846	-0.65688	-0.630711	0.0412505	-0.723743	-0.599864	-0.452055	0.422906	0.494422	0.59699	0.614596	-1
CD74	deaf	stri	ncl	0.785035	0.553343	0.553343	-0.00297081	-0.611633	-0.567996	-0.448681	0.304749	0.401663	0.500617	0.641105	1
CD74	deaf	x	lman	0.551219	0.497539	0.497539	-0.0250184	-0.569979	-0.52082	-0.429908	0.26833	0.344977	0.415252	0.454052	1
CD74	deaf	stri	lman	0.61868	0.504605	0.504605	-0.0160454	-0.618874	-0.545912	-0.38164	0.365447	0.440075	0.471454	0.500814	1
CD74	deaf	lman	x	0.551219	0.497539	0.497539	-0.0250184	-0.569979	-0.52082	-0.429908	0.26833	0.344977	0.415252	0.454052	1
CD74	deaf	ncl	stri	0.785035	0.553343	0.553343	-0.00297081	-0.611633	-0.567996	-0.448681	0.304749	0.401663	0.500617	0.641105	1
CD74	deaf	lman	stri	0.61868	0.504605	0.504605	-0.0160454	-0.618874	-0.545912	-0.38164	0.365447	0.440075	0.471454	0.500814	1
CDC14B	deaf	x	arco	0.655269	0.602926	0.602926	-0.056476	-0.573325	-0.531608	-0.509646	0.229011	0.310785	0.477453	0.581738	1
CDC14B	deaf	x	hvc	-0.0855675	0.628559	-0.628559	0.00491522	-0.789615	-0.619937	-0.538015	0.438737	0.455429	0.500837	0.539272	-1
CDC14B	deaf	arco	x	0.655269	0.602926	0.602926	-0.056476	-0.573325	-0.531608	-0.509646	0.229011	0.310785	0.477453	0.581738	1
CDC14B	deaf	hvc	x	-0.0855675	0.628559	-0.628559	0.00491522	-0.789615	-0.619937	-0.538015	0.438737	0.455429	0.500837	0.539272	-1
CDC42SE2-C	deaf	hvc	ra	0.27021	-0.5471	-0.5471	-0.0123513	-0.555157	-0.506252	-0.440298	0.345755	0.459941	0.664709	0.734223	-1
CDC42SE2-C	deaf	nido	ra	0.011504	-0.728169	-0.728169	0.0172903	-0.50289	-0.423055	-0.383809	0.341007	0.371697	0.455332	0.556224	-1
CDC42SE2-C	deaf	ncl	arco	0.0481721	-0.562286	-0.562286	0.0342572	-0.482397	-0.405585	-0.370187	0.34069	0.440345	0.592849	0.667533	-1
CDC42SE2-C	deaf	ra	hvc	0.27021	-0.5471	-0.5471	-0.0123513	-0.555157	-0.506252	-0.440298	0.345755	0.459941	0.664709	0.734223	-1
CDC42SE2-C	deaf	lman	hvc	-0.68129	-0.586249	0.586249	0.0154425	-0.681901	-0.46605	-0.40909	0.365756	0.453153	0.496059	0.647682	1
CDC42SE2-C	deaf	arco	ncl	0.0481721	-0.562286	-0.562286	0.0342572	-0.482397	-0.405585	-0.370187	0.34069	0.440345	0.592849	0.667533	-1
CDC42SE2-C	deaf	hvc	lman	-0.68129	-0.586249	0.586249	0.0154425	-0.681901	-0.46605	-0.40909	0.365756	0.453153	0.496059	0.647682	1
CDC42SE2-C	deaf	ra	nido	0.011504	-0.728169	-0.728169	0.0172903	-0.50289	-0.423055	-0.383809	0.341007	0.371697	0.455332	0.556224	-1
CDH18	deaf	nido	hvc	-0.1325	-0.871802	-0.606802	-0.00819862	-0.5649	-0.516493	-0.46395	0.350686	0.465651	0.558506	0.61783	-1
CDH18	deaf	x	ncl	-0.540534	-0.632603	0.448465	-0.00186364	-0.634437	-0.507203	-0.472467	0.335034	0.396095	0.418217	0.470313	1
CDH18	deaf	hvc	nido	-0.1325	-0.871802	-0.606802	-0.00819862	-0.5649	-0.516493	-0.46395	0.350686	0.465651	0.558506	0.61783	-1
CDH18	deaf	ncl	x	-0.540534	-0.632603	0.448465	-0.00186364	-0.634437	-0.507203	-0.472467	0.335034	0.396095	0.418217	0.470313	1
CDH22	deaf	arco	ra	-0.126873	-0.823533	-0.569786	0.0242369	-0.537184	-0.476999	-0.383796	0.40531	0.47917	0.577422	0.714349	-1
CDH22	deaf	ra	arco	-0.126873	-0.823533	-0.569786	0.0242369	-0.537184	-0.476999	-0.383796	0.40531	0.47917	0.577422	0.714349	-1
CDH22	deaf	nido	arco	0.60159	0.576495	0.576495	0.0359514	-0.581281	-0.435414	-0.363956	0.355165	0.472972	0.517326	0.566432	1
CDH22	deaf	stri	arco	-0.546536	-0.545165	0.545165	-0.0887164	-0.76168	-0.651356	-0.599899	0.263314	0.398971	0.418012	0.45846	1
CDH22	deaf	arco	nido	0.60159	0.576495	0.576495	0.0359514	-0.581281	-0.435414	-0.363956	0.355165	0.472972	0.517326	0.566432	1
CDH22	deaf	arco	stri	-0.546536	-0.545165	0.545165	-0.0887164	-0.76168	-0.651356	-0.599899	0.263314	0.398971	0.418012	0.45846	1
CDH7	deaf	stri	ra	-0.10792	-0.940734	-0.724895	0.0115808	-0.721066	-0.561193	-0.492321	0.412582	0.468952	0.537103	0.623569	-1
CDH7	deaf	ra	stri	-0.10792	-0.940734	-0.724895	0.0115808	-0.721066	-0.561193	-0.492321	0.412582	0.468952	0.537103	0.623569	-1
CDH9	deaf	ncl	ra	-0.871977	-1.12868	0.615274	-0.0276271	-0.634052	-0.609254	-0.473391	0.339934	0.48483	0.510893	0.54296	1
CDH9	deaf	lman	hvc	0.0704878	-0.781623	-0.781623	0.0126921	-0.536555	-0.514517	-0.423003	0.308901	0.374357	0.447592	0.531596	-1
CDH9	deaf	stri	hvc	0.163453	0.867424	-0.540518	-0.00841522	-0.580975	-0.466829	-0.43081	0.353764	0.453432	0.485967	0.505967	-1
CDH9	deaf	ra	ncl	-0.871977	-1.12868	0.615274	-0.0276271	-0.634052	-0.609254	-0.473391	0.339934	0.48483	0.510893	0.54296	1
CDH9	deaf	hvc	lman	0.0704878	-0.781623	-0.781623	0.0126921	-0.536555	-0.514517	-0.423003	0.308901	0.374357	0.447592	0.531596	-1
CDH9	deaf	hvc	stri	0.163453	0.867424	-0.540518	-0.00841522	-0.580975	-0.466829	-0.43081	0.353764	0.453432	0.485967	0.505967	-1
CDK5	deaf	x	ra	0.264997	-0.562583	-0.562583	-0.00208162	-0.599123	-0.522732	-0.389355	0.298477	0.348676	0.413456	0.484633	-1
CDK5	deaf	ncl	hvc	0.962682	0.486893	0.486893	-0.0600735	-0.546842	-0.469205	-0.448049	0.249882	0.33486	0.459062	0.488028	1
CDK5	deaf	hvc	ncl	0.962682	0.486893	0.486893	-0.0600735	-0.546842	-0.469205	-0.448049	0.249882	0.33486	0.459062	0.488028	1
CDK5	deaf	ra	x	0.264997	-0.562583	-0.562583	-0.00208162	-0.599123	-0.522732	-0.389355	0.298477	0.348676	0.413456	0.484633	-1
CDK5RAP1	deaf	lman	arco	0.123703	-0.778975	-0.778975	0.00620773	-0.626147	-0.420689	-0.35886	0.290581	0.426304	0.500374	0.652969	-1
CDK5RAP1	deaf	arco	lman	0.123703	-0.778975	-0.778975	0.00620773	-0.626147	-0.420689	-0.35886	0.290581	0.426304	0.500374	0.652969	-1
CDK5RAP1	deaf	nido	lman	-0.227895	-0.874375	-0.418585	0.0528887	-0.390348	-0.36417	-0.319098	0.38812	0.487458	0.555056	0.601344	-1
CDK5RAP1	deaf	lman	nido	-0.227895	-0.874375	-0.418585	0.0528887	-0.390348	-0.36417	-0.319098	0.38812	0.487458	0.555056	0.601344	-1
CDK7	deaf	hvc	arco	0.602357	0.534205	0.534205	-0.0381054	-0.558342	-0.538274	-0.506061	0.337047	0.441674	0.468712	0.534695	1
CDK7	deaf	stri	arco	0.842866	0.788875	0.788875	0.0361991	-0.506361	-0.492889	-0.444268	0.35223	0.508138	0.549263	0.635473	1
CDK7	deaf	arco	hvc	0.602357	0.534205	0.534205	-0.0381054	-0.558342	-0.538274	-0.506061	0.337047	0.441674	0.468712	0.534695	1
CDK7	deaf	ncl	hvc	0.922439	0.657859	0.657859	-0.0489561	-0.655807	-0.607702	-0.563609	0.271207	0.447384	0.507138	0.643999	1
CDK7	deaf	x	hvc	0.850398	0.638286	0.638286	0.0143164	-0.507164	-0.446787	-0.356404	0.328415	0.362075	0.404006	0.460143	1
CDK7	deaf	hvc	ncl	0.922439	0.657859	0.657859	-0.0489561	-0.655807	-0.607702	-0.563609	0.271207	0.447384	0.507138	0.643999	1
CDK7	deaf	x	ncl	0.921514	1.02739	0.815641	0.0115222	-0.541744	-0.523618	-0.459061	0.365609	0.462433	0.536548	0.56068	1
CDK7	deaf	nido	lman	0.128219	-0.633893	-0.633893	-0.0309671	-0.611425	-0.556527	-0.536543	0.317856	0.445463	0.499522	0.532679	-1
CDK7	deaf	lman	nido	0.128219	-0.633893	-0.633893	-0.0309671	-0.611425	-0.556527	-0.536543	0.317856	0.445463	0.499522	0.532679	-1
CDK7	deaf	hvc	x	0.850398	0.638286	0.638286	0.0143164	-0.507164	-0.446787	-0.356404	0.328415	0.362075	0.404006	0.460143	1
CDK7	deaf	ncl	x	0.921514	1.02739	0.815641	0.0115222	-0.541744	-0.523618	-0.459061	0.365609	0.462433	0.536548	0.56068	1
CDK7	deaf	arco	stri	0.842866	0.788875	0.788875	0.0361991	-0.506361	-0.492889	-0.444268	0.35223	0.508138	0.549263	0.635473	1
CDKN2AIP	deaf	stri	lman	0.749578	0.634961	0.634961	0.0231845	-0.477227	-0.430682	-0.401089	0.282041	0.429075	0.584976	0.673244	1
CDKN2AIP	deaf	lman	stri	0.749578	0.634961	0.634961	0.0231845	-0.477227	-0.430682	-0.401089	0.282041	0.429075	0.584976	0.673244	1
CDO1	deaf	x	arco	0.704351	0.685715	0.685715	-0.0102465	-0.563764	-0.50476	-0.482068	0.366402	0.505894	0.539591	0.604676	1
CDO1	deaf	stri	arco	0.634294	0.635898	0.63269	0.0120786	-0.537031	-0.450475	-0.391984	0.345153	0.396773	0.499341	0.560548	1
CDO1	deaf	arco	x	0.704351	0.685715	0.685715	-0.0102465	-0.563764	-0.50476	-0.482068	0.366402	0.505894	0.539591	0.604676	1
CDO1	deaf	arco	stri	0.634294	0.635898	0.63269	0.0120786	-0.537031	-0.450475	-0.391984	0.345153	0.396773	0.499341	0.560548	1
CDYL2	deaf	stri	arco	0.573331	0.622705	0.523956	0.0274309	-0.392729	-0.388426	-0.342654	0.452111	0.509323	0.516791	0.627046	1
CDYL2	deaf	x	lman	0.0524077	0.984577	-0.879761	0.038585	-0.586585	-0.531605	-0.357589	0.390064	0.51708	0.611673	0.633211	-1
CDYL2	deaf	lman	x	0.0524077	0.984577	-0.879761	0.038585	-0.586585	-0.531605	-0.357589	0.390064	0.51708	0.611673	0.633211	-1
CDYL2	deaf	arco	stri	0.573331	0.622705	0.523956	0.0274309	-0.392729	-0.388426	-0.342654	0.452111	0.509323	0.516791	0.627046	1
CELSR1	deaf	nido	lman	0.640767	0.573395	0.573395	-0.0405989	-0.587461	-0.562038	-0.53239	0.327716	0.400705	0.524849	0.600608	1
CELSR1	deaf	stri	lman	8.69777e-06	0.522427	-0.522409	0.0799072	-0.466271	-0.417387	-0.33095	0.415778	0.507392	0.628882	0.837524	-1
CELSR1	deaf	lman	nido	0.640767	0.573395	0.573395	-0.0405989	-0.587461	-0.562038	-0.53239	0.327716	0.400705	0.524849	0.600608	1
CELSR1	deaf	lman	stri	8.69777e-06	0.522427	-0.522409	0.0799072	-0.466271	-0.417387	-0.33095	0.415778	0.507392	0.628882	0.837524	-1
CELSR3	deaf	stri	ra	0.093291	-0.676439	-0.676439	-0.0295019	-0.629283	-0.594512	-0.53407	0.307727	0.4744	0.542227	0.591702	-1
CELSR3	deaf	stri	hvc	-0.10943	0.585055	-0.585055	-0.0422223	-0.638166	-0.534778	-0.450472	0.277382	0.352013	0.434346	0.482537	-1
CELSR3	deaf	ra	stri	0.093291	-0.676439	-0.676439	-0.0295019	-0.629283	-0.594512	-0.53407	0.307727	0.4744	0.542227	0.591702	-1
CELSR3	deaf	hvc	stri	-0.10943	0.585055	-0.585055	-0.0422223	-0.638166	-0.534778	-0.450472	0.277382	0.352013	0.434346	0.482537	-1
CENPH	deaf	arco	ra	0.0386278	-0.603889	-0.603889	0.00522513	-0.656569	-0.599151	-0.505898	0.456985	0.563937	0.61452	0.647654	-1
CENPH	deaf	hvc	ra	0.0498955	-0.808722	-0.808722	0.000493046	-0.5126	-0.471715	-0.428512	0.409806	0.452975	0.499163	0.553611	-1
CENPH	deaf	lman	ra	0.270116	-0.456583	-0.456583	0.0334097	-0.546607	-0.403422	-0.372952	0.354554	0.428283	0.487794	0.527224	-1
CENPH	deaf	nido	ra	-0.393519	-1.34735	-0.560317	0.0207722	-0.562344	-0.496507	-0.405422	0.380062	0.468388	0.571305	0.61085	-1
CENPH	deaf	x	ra	0.203604	-0.583321	-0.583321	-0.0158192	-0.691553	-0.576502	-0.513839	0.370739	0.477416	0.545216	0.628598	-1
CENPH	deaf	ra	arco	0.0386278	-0.603889	-0.603889	0.00522513	-0.656569	-0.599151	-0.505898	0.456985	0.563937	0.61452	0.647654	-1
CENPH	deaf	lman	arco	0.0098257	-0.805039	-0.805039	0.0301254	-0.583229	-0.430021	-0.388355	0.499598	0.590099	0.614464	0.763951	-1
CENPH	deaf	ra	hvc	0.0498955	-0.808722	-0.808722	0.000493046	-0.5126	-0.471715	-0.428512	0.409806	0.452975	0.499163	0.553611	-1
CENPH	deaf	nido	hvc	0.0279637	-0.783045	-0.783045	0.0146981	-0.775297	-0.570808	-0.504005	0.394159	0.482745	0.522014	0.546113	-1
CENPH	deaf	stri	hvc	0.541636	0.415427	0.415427	-0.0765247	-0.642279	-0.59809	-0.517763	0.202286	0.284696	0.352451	0.420946	1
CENPH	deaf	ra	lman	0.270116	-0.456583	-0.456583	0.0334097	-0.546607	-0.403422	-0.372952	0.354554	0.428283	0.487794	0.527224	-1
CENPH	deaf	arco	lman	0.0098257	-0.805039	-0.805039	0.0301254	-0.583229	-0.430021	-0.388355	0.499598	0.590099	0.614464	0.763951	-1
CENPH	deaf	stri	lman	-0.00135239	-0.782239	-0.779534	0.00131589	-0.568827	-0.563307	-0.431979	0.382647	0.495738	0.619791	0.768407	-1
CENPH	deaf	ra	nido	-0.393519	-1.34735	-0.560317	0.0207722	-0.562344	-0.496507	-0.405422	0.380062	0.468388	0.571305	0.61085	-1
CENPH	deaf	hvc	nido	0.0279637	-0.783045	-0.783045	0.0146981	-0.775297	-0.570808	-0.504005	0.394159	0.482745	0.522014	0.546113	-1
CENPH	deaf	x	nido	0.0195532	-0.810762	-0.810762	0.0671598	-0.517361	-0.513337	-0.461334	0.494048	0.552478	0.581793	0.637935	-1
CENPH	deaf	ra	x	0.203604	-0.583321	-0.583321	-0.0158192	-0.691553	-0.576502	-0.513839	0.370739	0.477416	0.545216	0.628598	-1
CENPH	deaf	nido	x	0.0195532	-0.810762	-0.810762	0.0671598	-0.517361	-0.513337	-0.461334	0.494048	0.552478	0.581793	0.637935	-1
CENPH	deaf	hvc	stri	0.541636	0.415427	0.415427	-0.0765247	-0.642279	-0.59809	-0.517763	0.202286	0.284696	0.352451	0.420946	1
CENPH	deaf	lman	stri	-0.00135239	-0.782239	-0.779534	0.00131589	-0.568827	-0.563307	-0.431979	0.382647	0.495738	0.619791	0.768407	-1
CENPU	deaf	stri	arco	0.842065	1.04463	0.639497	0.0197214	-0.535104	-0.52681	-0.37872	0.418998	0.55149	0.571343	0.653629	1
CENPU	deaf	lman	hvc	0.125441	-0.690896	-0.690896	-0.0274526	-0.559367	-0.508445	-0.472346	0.282537	0.449952	0.505823	0.603356	-1
CENPU	deaf	x	hvc	0.150908	-0.736321	-0.736321	0.0552986	-0.810236	-0.645168	-0.441666	0.426442	0.474311	0.532427	0.678075	-1
CENPU	deaf	hvc	lman	0.125441	-0.690896	-0.690896	-0.0274526	-0.559367	-0.508445	-0.472346	0.282537	0.449952	0.505823	0.603356	-1
CENPU	deaf	hvc	x	0.150908	-0.736321	-0.736321	0.0552986	-0.810236	-0.645168	-0.441666	0.426442	0.474311	0.532427	0.678075	-1
CENPU	deaf	arco	stri	0.842065	1.04463	0.639497	0.0197214	-0.535104	-0.52681	-0.37872	0.418998	0.55149	0.571343	0.653629	1
CENPW	deaf	arco	ra	0.764597	0.74909	0.74909	0.00689814	-0.595882	-0.558503	-0.459933	0.497616	0.563252	0.668618	0.692524	1
CENPW	deaf	hvc	ra	0.8797	0.812279	0.812279	-0.0321338	-0.651699	-0.574883	-0.50424	0.33018	0.451102	0.732159	0.74787	1
CENPW	deaf	ra	arco	0.764597	0.74909	0.74909	0.00689814	-0.595882	-0.558503	-0.459933	0.497616	0.563252	0.668618	0.692524	1
CENPW	deaf	ra	hvc	0.8797	0.812279	0.812279	-0.0321338	-0.651699	-0.574883	-0.50424	0.33018	0.451102	0.732159	0.74787	1
CENPW	deaf	x	hvc	0.769877	0.570307	0.570307	-0.0227412	-0.609406	-0.59264	-0.450285	0.271599	0.422714	0.481064	0.731634	1
CENPW	deaf	hvc	x	0.769877	0.570307	0.570307	-0.0227412	-0.609406	-0.59264	-0.450285	0.271599	0.422714	0.481064	0.731634	1
CEP104	deaf	ncl	hvc	0.703329	0.718006	0.688652	-0.0185145	-0.709391	-0.66706	-0.52893	0.362501	0.430924	0.541918	0.563895	1
CEP104	deaf	hvc	ncl	0.703329	0.718006	0.688652	-0.0185145	-0.709391	-0.66706	-0.52893	0.362501	0.430924	0.541918	0.563895	1
CEP41	deaf	nido	ncl	-0.130778	-0.981807	-0.72025	-0.0490371	-0.550154	-0.50845	-0.462176	0.27637	0.433687	0.569943	0.593762	-1
CEP41	deaf	stri	ncl	0.0203054	-0.747079	-0.747079	0.0130996	-0.625197	-0.560766	-0.440842	0.335651	0.398065	0.539239	0.582162	-1
CEP41	deaf	stri	lman	-0.0790997	-0.755581	-0.597382	-0.000736235	-0.618722	-0.524656	-0.46398	0.321174	0.469194	0.500287	0.547609	-1
CEP41	deaf	ncl	nido	-0.130778	-0.981807	-0.72025	-0.0490371	-0.550154	-0.50845	-0.462176	0.27637	0.433687	0.569943	0.593762	-1
CEP41	deaf	stri	nido	-0.0986653	-0.912483	-0.715153	-0.0593414	-0.83161	-0.630627	-0.551688	0.332794	0.473876	0.596908	0.719263	-1
CEP41	deaf	stri	x	-0.0360095	-0.74592	-0.673901	0.0233016	-0.446619	-0.418866	-0.383017	0.313231	0.471336	0.565349	0.648163	-1
CEP41	deaf	ncl	stri	0.0203054	-0.747079	-0.747079	0.0130996	-0.625197	-0.560766	-0.440842	0.335651	0.398065	0.539239	0.582162	-1
CEP41	deaf	lman	stri	-0.0790997	-0.755581	-0.597382	-0.000736235	-0.618722	-0.524656	-0.46398	0.321174	0.469194	0.500287	0.547609	-1
CEP41	deaf	nido	stri	-0.0986653	-0.912483	-0.715153	-0.0593414	-0.83161	-0.630627	-0.551688	0.332794	0.473876	0.596908	0.719263	-1
CEP41	deaf	x	stri	-0.0360095	-0.74592	-0.673901	0.0233016	-0.446619	-0.418866	-0.383017	0.313231	0.471336	0.565349	0.648163	-1
CEP57	deaf	nido	hvc	-0.0456811	0.759387	-0.759387	-0.0512285	-0.65852	-0.600551	-0.563729	0.357244	0.436847	0.445505	0.553733	-1
CEP57	deaf	x	ncl	-0.532517	-0.569768	0.495265	-0.00970671	-0.706708	-0.670907	-0.610258	0.341226	0.387763	0.459543	0.534639	1
CEP57	deaf	hvc	nido	-0.0456811	0.759387	-0.759387	-0.0512285	-0.65852	-0.600551	-0.563729	0.357244	0.436847	0.445505	0.553733	-1
CEP57	deaf	ncl	x	-0.532517	-0.569768	0.495265	-0.00970671	-0.706708	-0.670907	-0.610258	0.341226	0.387763	0.459543	0.534639	1
CEP83	deaf	arco	ra	-0.0407388	-0.642097	-0.560619	0.00699559	-0.618113	-0.453551	-0.421272	0.401127	0.492474	0.522704	0.554426	-1
CEP83	deaf	ra	arco	-0.0407388	-0.642097	-0.560619	0.00699559	-0.618113	-0.453551	-0.421272	0.401127	0.492474	0.522704	0.554426	-1
CEP83	deaf	ncl	hvc	-0.670625	-0.76592	0.57533	-0.00418527	-0.544284	-0.499991	-0.416162	0.320742	0.369111	0.433098	0.510808	1
CEP83	deaf	x	hvc	0.301668	-0.483292	-0.483292	0.0765306	-0.447754	-0.393828	-0.292308	0.409486	0.54327	0.681892	0.733161	-1
CEP83	deaf	hvc	ncl	-0.670625	-0.76592	0.57533	-0.00418527	-0.544284	-0.499991	-0.416162	0.320742	0.369111	0.433098	0.510808	1
CEP83	deaf	lman	ncl	-0.0511824	-0.607367	-0.505002	0.0801043	-0.469934	-0.449592	-0.372921	0.393344	0.474116	0.559599	0.617385	-1
CEP83	deaf	ncl	lman	-0.0511824	-0.607367	-0.505002	0.0801043	-0.469934	-0.449592	-0.372921	0.393344	0.474116	0.559599	0.617385	-1
CEP83	deaf	hvc	x	0.301668	-0.483292	-0.483292	0.0765306	-0.447754	-0.393828	-0.292308	0.409486	0.54327	0.681892	0.733161	-1
CEPT1	deaf	nido	arco	-0.108636	-0.71204	-0.494767	0.00155866	-0.589943	-0.469878	-0.393198	0.260455	0.353994	0.392807	0.496357	-1
CEPT1	deaf	arco	nido	-0.108636	-0.71204	-0.494767	0.00155866	-0.589943	-0.469878	-0.393198	0.260455	0.353994	0.392807	0.496357	-1
CERCAM	deaf	nido	lman	0.578961	0.622693	0.535229	-0.0226538	-0.684609	-0.518426	-0.412266	0.290651	0.39727	0.460307	0.50824	1
CERCAM	deaf	lman	nido	0.578961	0.622693	0.535229	-0.0226538	-0.684609	-0.518426	-0.412266	0.290651	0.39727	0.460307	0.50824	1
CERCAM	deaf	x	nido	0.605446	0.567891	0.567891	-0.0242043	-0.701186	-0.632299	-0.492343	0.416226	0.494284	0.554155	0.574311	1
CERCAM	deaf	nido	x	0.605446	0.567891	0.567891	-0.0242043	-0.701186	-0.632299	-0.492343	0.416226	0.494284	0.554155	0.574311	1
CERS4	deaf	hvc	ra	0.506591	0.498601	0.498601	-0.0929696	-0.701987	-0.695097	-0.628956	0.301743	0.421005	0.490684	0.521022	1
CERS4	deaf	ra	hvc	0.506591	0.498601	0.498601	-0.0929696	-0.701987	-0.695097	-0.628956	0.301743	0.421005	0.490684	0.521022	1
CERS4	deaf	x	lman	-0.127859	-0.938482	-0.682764	-0.014584	-0.61122	-0.541733	-0.440115	0.397776	0.457089	0.53017	0.617116	-1
CERS4	deaf	lman	x	-0.127859	-0.938482	-0.682764	-0.014584	-0.61122	-0.541733	-0.440115	0.397776	0.457089	0.53017	0.617116	-1
CHAC1	deaf	ncl	ra	0.70289	0.875089	0.53069	-0.0449516	-0.678532	-0.552588	-0.4168	0.26858	0.33928	0.447033	0.492569	1
CHAC1	deaf	lman	ra	0.0118539	-0.735648	-0.735648	-0.03765	-0.537366	-0.485628	-0.451006	0.327681	0.497015	0.567714	0.627442	-1
CHAC1	deaf	stri	ra	-0.0571588	-0.722011	-0.607693	-0.0378474	-0.630547	-0.564086	-0.459734	0.388166	0.558897	0.620118	0.694098	-1
CHAC1	deaf	ncl	hvc	0.763028	0.925876	0.60018	-0.0319643	-0.583463	-0.51038	-0.456874	0.346839	0.439787	0.487322	0.514	1
CHAC1	deaf	x	hvc	-0.60558	-0.612062	0.599098	-0.0282155	-0.538531	-0.531007	-0.445523	0.290666	0.461011	0.500519	0.616385	1
CHAC1	deaf	ra	ncl	0.70289	0.875089	0.53069	-0.0449516	-0.678532	-0.552588	-0.4168	0.26858	0.33928	0.447033	0.492569	1
CHAC1	deaf	hvc	ncl	0.763028	0.925876	0.60018	-0.0319643	-0.583463	-0.51038	-0.456874	0.346839	0.439787	0.487322	0.514	1
CHAC1	deaf	ra	lman	0.0118539	-0.735648	-0.735648	-0.03765	-0.537366	-0.485628	-0.451006	0.327681	0.497015	0.567714	0.627442	-1
CHAC1	deaf	hvc	x	-0.60558	-0.612062	0.599098	-0.0282155	-0.538531	-0.531007	-0.445523	0.290666	0.461011	0.500519	0.616385	1
CHAC1	deaf	ra	stri	-0.0571588	-0.722011	-0.607693	-0.0378474	-0.630547	-0.564086	-0.459734	0.388166	0.558897	0.620118	0.694098	-1
CHAF1A	deaf	x	arco	0.785623	0.889814	0.681432	-0.033228	-0.582742	-0.564149	-0.507689	0.319202	0.538182	0.580769	0.707404	1
CHAF1A	deaf	stri	ncl	-0.843996	-0.863339	0.824654	0.0206063	-0.673545	-0.466298	-0.435861	0.365139	0.488755	0.522188	0.548032	1
CHAF1A	deaf	arco	x	0.785623	0.889814	0.681432	-0.033228	-0.582742	-0.564149	-0.507689	0.319202	0.538182	0.580769	0.707404	1
CHAF1A	deaf	ncl	stri	-0.843996	-0.863339	0.824654	0.0206063	-0.673545	-0.466298	-0.435861	0.365139	0.488755	0.522188	0.548032	1
CHAMP1	deaf	lman	arco	-0.0279287	-0.635974	-0.580117	0.00998845	-0.500347	-0.478633	-0.441711	0.331364	0.464339	0.577189	0.685021	-1
CHAMP1	deaf	nido	arco	0.0138748	-0.530024	-0.530024	0.00228817	-0.565007	-0.469346	-0.441799	0.355677	0.421896	0.465456	0.487887	-1
CHAMP1	deaf	x	ncl	-0.815896	-1.10214	0.529649	-0.0211492	-0.725462	-0.615602	-0.49341	0.324115	0.45742	0.47501	0.745165	1
CHAMP1	deaf	arco	lman	-0.0279287	-0.635974	-0.580117	0.00998845	-0.500347	-0.478633	-0.441711	0.331364	0.464339	0.577189	0.685021	-1
CHAMP1	deaf	nido	lman	-0.0388825	-0.812021	-0.734256	0.028216	-0.634401	-0.491222	-0.427076	0.340664	0.434251	0.469399	0.74217	-1
CHAMP1	deaf	arco	nido	0.0138748	-0.530024	-0.530024	0.00228817	-0.565007	-0.469346	-0.441799	0.355677	0.421896	0.465456	0.487887	-1
CHAMP1	deaf	lman	nido	-0.0388825	-0.812021	-0.734256	0.028216	-0.634401	-0.491222	-0.427076	0.340664	0.434251	0.469399	0.74217	-1
CHAMP1	deaf	ncl	x	-0.815896	-1.10214	0.529649	-0.0211492	-0.725462	-0.615602	-0.49341	0.324115	0.45742	0.47501	0.745165	1
CHD1L	deaf	hvc	ra	0.218606	1.00384	-0.566629	0.0403259	-0.584483	-0.52994	-0.453297	0.395293	0.493414	0.598317	0.629655	-1
CHD1L	deaf	ra	hvc	0.218606	1.00384	-0.566629	0.0403259	-0.584483	-0.52994	-0.453297	0.395293	0.493414	0.598317	0.629655	-1
CHD1L	deaf	nido	ncl	-0.230522	-0.970555	-0.509511	0.0109584	-0.502673	-0.497523	-0.479786	0.388906	0.50236	0.63046	0.656479	-1
CHD1L	deaf	ncl	nido	-0.230522	-0.970555	-0.509511	0.0109584	-0.502673	-0.497523	-0.479786	0.388906	0.50236	0.63046	0.656479	-1
CHEK1	deaf	stri	hvc	0.828775	0.641381	0.641381	-0.0207944	-0.659069	-0.543089	-0.477213	0.279291	0.314697	0.389918	0.461904	1
CHEK1	deaf	hvc	stri	0.828775	0.641381	0.641381	-0.0207944	-0.659069	-0.543089	-0.477213	0.279291	0.314697	0.389918	0.461904	1
CHRM4	deaf	stri	arco	-0.0258194	-0.753842	-0.702203	-0.0191995	-0.659049	-0.606564	-0.434444	0.304076	0.400307	0.449769	0.524882	-1
CHRM4	deaf	lman	hvc	0.695143	0.767793	0.622492	0.0530789	-0.500644	-0.473508	-0.377945	0.368663	0.479164	0.547949	0.622602	1
CHRM4	deaf	hvc	lman	0.695143	0.767793	0.622492	0.0530789	-0.500644	-0.473508	-0.377945	0.368663	0.479164	0.547949	0.622602	1
CHRM4	deaf	x	lman	0.26701	1.23065	-0.696636	0.0316864	-0.444188	-0.433256	-0.384402	0.369762	0.446047	0.484637	0.49676	-1
CHRM4	deaf	x	nido	-0.0322671	0.860411	-0.860411	0.0496397	-0.712406	-0.580031	-0.433382	0.366622	0.521101	0.587357	0.644443	-1
CHRM4	deaf	lman	x	0.26701	1.23065	-0.696636	0.0316864	-0.444188	-0.433256	-0.384402	0.369762	0.446047	0.484637	0.49676	-1
CHRM4	deaf	nido	x	-0.0322671	0.860411	-0.860411	0.0496397	-0.712406	-0.580031	-0.433382	0.366622	0.521101	0.587357	0.644443	-1
CHRM4	deaf	arco	stri	-0.0258194	-0.753842	-0.702203	-0.0191995	-0.659049	-0.606564	-0.434444	0.304076	0.400307	0.449769	0.524882	-1
CHRNA4	deaf	nido	lman	0.618311	0.567985	0.567985	-0.0293736	-0.670565	-0.615897	-0.446894	0.290711	0.342976	0.404249	0.555555	1
CHRNA4	deaf	lman	nido	0.618311	0.567985	0.567985	-0.0293736	-0.670565	-0.615897	-0.446894	0.290711	0.342976	0.404249	0.555555	1
CHST8	deaf	arco	ra	-0.0568994	-0.717864	-0.604065	-0.0149368	-0.542382	-0.521674	-0.413424	0.376427	0.407426	0.492431	0.607939	-1
CHST8	deaf	nido	ra	-0.00293747	-0.632197	-0.626322	0.0550911	-0.619977	-0.546276	-0.49417	0.474952	0.580148	0.675094	0.678594	-1
CHST8	deaf	ra	arco	-0.0568994	-0.717864	-0.604065	-0.0149368	-0.542382	-0.521674	-0.413424	0.376427	0.407426	0.492431	0.607939	-1
CHST8	deaf	nido	arco	0.118781	-0.554189	-0.554189	-0.0221065	-0.659838	-0.442906	-0.427122	0.331954	0.413935	0.447278	0.53385	-1
CHST8	deaf	x	ncl	-0.161558	-0.951997	-0.628881	0.059209	-0.610559	-0.549096	-0.491648	0.385729	0.417005	0.542541	0.564007	-1
CHST8	deaf	x	lman	-0.727629	-0.710076	0.710076	0.0258047	-0.597628	-0.564547	-0.381295	0.404076	0.495386	0.50635	0.547447	1
CHST8	deaf	ra	nido	-0.00293747	-0.632197	-0.626322	0.0550911	-0.619977	-0.546276	-0.49417	0.474952	0.580148	0.675094	0.678594	-1
CHST8	deaf	arco	nido	0.118781	-0.554189	-0.554189	-0.0221065	-0.659838	-0.442906	-0.427122	0.331954	0.413935	0.447278	0.53385	-1
CHST8	deaf	ncl	x	-0.161558	-0.951997	-0.628881	0.059209	-0.610559	-0.549096	-0.491648	0.385729	0.417005	0.542541	0.564007	-1
CHST8	deaf	lman	x	-0.727629	-0.710076	0.710076	0.0258047	-0.597628	-0.564547	-0.381295	0.404076	0.495386	0.50635	0.547447	1
CHST9	deaf	stri	hvc	0.197361	-0.560934	-0.560934	-0.0308116	-0.551333	-0.546658	-0.521105	0.264782	0.38623	0.471233	0.504698	-1
CHST9	deaf	stri	lman	0.676521	0.494649	0.494649	-0.0282275	-0.593579	-0.463181	-0.421855	0.29682	0.421232	0.46543	0.500672	1
CHST9	deaf	hvc	stri	0.197361	-0.560934	-0.560934	-0.0308116	-0.551333	-0.546658	-0.521105	0.264782	0.38623	0.471233	0.504698	-1
CHST9	deaf	lman	stri	0.676521	0.494649	0.494649	-0.0282275	-0.593579	-0.463181	-0.421855	0.29682	0.421232	0.46543	0.500672	1
CHSY3	deaf	lman	ra	0.510648	0.540568	0.480729	-0.01804	-0.614163	-0.611793	-0.565805	0.352995	0.407085	0.462033	0.654537	1
CHSY3	deaf	nido	hvc	-0.541143	-0.565349	0.516937	-0.0736763	-0.719707	-0.680329	-0.518259	0.298332	0.39861	0.467012	0.647383	1
CHSY3	deaf	ra	lman	0.510648	0.540568	0.480729	-0.01804	-0.614163	-0.611793	-0.565805	0.352995	0.407085	0.462033	0.654537	1
CHSY3	deaf	nido	lman	-0.00816554	-0.52239	-0.506059	0.0523449	-0.515434	-0.419969	-0.402905	0.371397	0.558953	0.592576	0.652852	-1
CHSY3	deaf	hvc	nido	-0.541143	-0.565349	0.516937	-0.0736763	-0.719707	-0.680329	-0.518259	0.298332	0.39861	0.467012	0.647383	1
CHSY3	deaf	lman	nido	-0.00816554	-0.52239	-0.506059	0.0523449	-0.515434	-0.419969	-0.402905	0.371397	0.558953	0.592576	0.652852	-1
CISD3	deaf	stri	ra	0.786986	0.588764	0.588764	0.0118544	-0.649962	-0.605587	-0.566064	0.398383	0.457103	0.575648	0.633584	1
CISD3	deaf	lman	hvc	0.120495	-0.529763	-0.529763	0.0715066	-0.466551	-0.452318	-0.334852	0.378679	0.446533	0.491697	0.530193	-1
CISD3	deaf	hvc	lman	0.120495	-0.529763	-0.529763	0.0715066	-0.466551	-0.452318	-0.334852	0.378679	0.446533	0.491697	0.530193	-1
CISD3	deaf	ra	stri	0.786986	0.588764	0.588764	0.0118544	-0.649962	-0.605587	-0.566064	0.398383	0.457103	0.575648	0.633584	1
CKAP2	deaf	nido	arco	0.0345731	-0.49949	-0.49949	-0.0209995	-0.514408	-0.480518	-0.42509	0.306606	0.358735	0.490795	0.619672	-1
CKAP2	deaf	arco	nido	0.0345731	-0.49949	-0.49949	-0.0209995	-0.514408	-0.480518	-0.42509	0.306606	0.358735	0.490795	0.619672	-1
CLCN6	deaf	arco	ra	-0.274159	-1.09905	-0.550731	0.0368213	-0.533883	-0.508982	-0.48245	0.418995	0.50287	0.644305	0.691671	-1
CLCN6	deaf	x	ra	0.084543	-0.537881	-0.537881	0.0569633	-0.543238	-0.51433	-0.356781	0.413926	0.45481	0.529444	0.617268	-1
CLCN6	deaf	ra	arco	-0.274159	-1.09905	-0.550731	0.0368213	-0.533883	-0.508982	-0.48245	0.418995	0.50287	0.644305	0.691671	-1
CLCN6	deaf	lman	hvc	0.232393	-0.510367	-0.510367	-0.0261734	-0.640946	-0.46748	-0.405134	0.330647	0.417582	0.449884	0.490713	-1
CLCN6	deaf	hvc	lman	0.232393	-0.510367	-0.510367	-0.0261734	-0.640946	-0.46748	-0.405134	0.330647	0.417582	0.449884	0.490713	-1
CLCN6	deaf	nido	lman	0.147858	-0.680953	-0.680953	0.0369718	-0.433845	-0.417394	-0.347849	0.360623	0.402312	0.514705	0.572166	-1
CLCN6	deaf	lman	nido	0.147858	-0.680953	-0.680953	0.0369718	-0.433845	-0.417394	-0.347849	0.360623	0.402312	0.514705	0.572166	-1
CLCN6	deaf	ra	x	0.084543	-0.537881	-0.537881	0.0569633	-0.543238	-0.51433	-0.356781	0.413926	0.45481	0.529444	0.617268	-1
CLN5	deaf	hvc	arco	0.00224928	-0.483316	-0.483316	0.0519002	-0.536999	-0.452808	-0.376766	0.372518	0.453222	0.508921	0.573435	-1
CLN5	deaf	ncl	arco	0.117593	-0.73438	-0.73438	-0.0097049	-0.634743	-0.524839	-0.478198	0.369046	0.451436	0.603232	0.727697	-1
CLN5	deaf	arco	hvc	0.00224928	-0.483316	-0.483316	0.0519002	-0.536999	-0.452808	-0.376766	0.372518	0.453222	0.508921	0.573435	-1
CLN5	deaf	nido	hvc	0.612959	0.449101	0.449101	-0.00768533	-0.692996	-0.464201	-0.372706	0.2866	0.383863	0.429184	0.463812	1
CLN5	deaf	arco	ncl	0.117593	-0.73438	-0.73438	-0.0097049	-0.634743	-0.524839	-0.478198	0.369046	0.451436	0.603232	0.727697	-1
CLN5	deaf	nido	ncl	-0.129343	-0.701766	-0.44308	0.0179387	-0.492265	-0.436555	-0.377924	0.34596	0.466567	0.497955	0.529141	-1
CLN5	deaf	hvc	nido	0.612959	0.449101	0.449101	-0.00768533	-0.692996	-0.464201	-0.372706	0.2866	0.383863	0.429184	0.463812	1
CLN5	deaf	ncl	nido	-0.129343	-0.701766	-0.44308	0.0179387	-0.492265	-0.436555	-0.377924	0.34596	0.466567	0.497955	0.529141	-1
CLN5	deaf	x	nido	0.156869	-0.621344	-0.621344	0.0108478	-0.566908	-0.488078	-0.431645	0.322242	0.346738	0.411059	0.548935	-1
CLN5	deaf	nido	x	0.156869	-0.621344	-0.621344	0.0108478	-0.566908	-0.488078	-0.431645	0.322242	0.346738	0.411059	0.548935	-1
CNEP1R1	deaf	x	ra	-0.0992483	-0.747262	-0.548766	0.0157503	-0.560033	-0.528292	-0.39587	0.339554	0.513835	0.577204	0.643872	-1
CNEP1R1	deaf	x	lman	-0.0579186	-0.650186	-0.534349	-0.0200443	-0.708405	-0.52172	-0.447909	0.321044	0.362294	0.457926	0.61982	-1
CNEP1R1	deaf	x	nido	0.356813	-0.530319	-0.530319	-0.0108075	-0.570787	-0.506591	-0.4047	0.286581	0.377214	0.54601	0.647645	-1
CNEP1R1	deaf	ra	x	-0.0992483	-0.747262	-0.548766	0.0157503	-0.560033	-0.528292	-0.39587	0.339554	0.513835	0.577204	0.643872	-1
CNEP1R1	deaf	lman	x	-0.0579186	-0.650186	-0.534349	-0.0200443	-0.708405	-0.52172	-0.447909	0.321044	0.362294	0.457926	0.61982	-1
CNEP1R1	deaf	nido	x	0.356813	-0.530319	-0.530319	-0.0108075	-0.570787	-0.506591	-0.4047	0.286581	0.377214	0.54601	0.647645	-1
CNMD	deaf	stri	ra	0.695784	0.513973	0.513973	0.0251173	-0.650945	-0.468367	-0.411954	0.315138	0.420033	0.511244	0.526269	1
CNMD	deaf	lman	arco	0.832986	0.595101	0.595101	0.00458023	-0.59063	-0.526576	-0.473338	0.367375	0.455857	0.534893	0.609274	1
CNMD	deaf	nido	hvc	-0.112065	-0.938243	-0.714114	-0.0419416	-0.698853	-0.569019	-0.529786	0.255262	0.35843	0.407302	0.51418	-1
CNMD	deaf	stri	hvc	-0.131562	-0.76839	-0.505267	0.0317383	-0.579943	-0.454753	-0.385364	0.422566	0.482458	0.589093	0.72818	-1
CNMD	deaf	arco	lman	0.832986	0.595101	0.595101	0.00458023	-0.59063	-0.526576	-0.473338	0.367375	0.455857	0.534893	0.609274	1
CNMD	deaf	x	lman	-0.0999123	-0.886443	-0.686618	-0.0239467	-0.535061	-0.524995	-0.450885	0.32676	0.476418	0.524516	0.564722	-1
CNMD	deaf	hvc	nido	-0.112065	-0.938243	-0.714114	-0.0419416	-0.698853	-0.569019	-0.529786	0.255262	0.35843	0.407302	0.51418	-1
CNMD	deaf	lman	x	-0.0999123	-0.886443	-0.686618	-0.0239467	-0.535061	-0.524995	-0.450885	0.32676	0.476418	0.524516	0.564722	-1
CNMD	deaf	ra	stri	0.695784	0.513973	0.513973	0.0251173	-0.650945	-0.468367	-0.411954	0.315138	0.420033	0.511244	0.526269	1
CNMD	deaf	hvc	stri	-0.131562	-0.76839	-0.505267	0.0317383	-0.579943	-0.454753	-0.385364	0.422566	0.482458	0.589093	0.72818	-1
CNN3	deaf	arco	ra	0.954863	0.516398	0.516398	-0.00112074	-0.653329	-0.642657	-0.573181	0.354154	0.383766	0.444294	0.69348	1
CNN3	deaf	stri	ra	0.624911	0.454862	0.454862	-0.027828	-0.545918	-0.504601	-0.366295	0.268972	0.348731	0.39538	0.404809	1
CNN3	deaf	ra	arco	0.954863	0.516398	0.516398	-0.00112074	-0.653329	-0.642657	-0.573181	0.354154	0.383766	0.444294	0.69348	1
CNN3	deaf	x	arco	-0.0450434	-0.8088	-0.718713	0.0626868	-0.677141	-0.515969	-0.429204	0.456357	0.533831	0.625611	0.701055	-1
CNN3	deaf	stri	lman	0.906091	0.663593	0.663593	0.00535286	-0.633382	-0.581547	-0.448471	0.342403	0.478528	0.608778	0.647405	1
CNN3	deaf	stri	nido	-0.121354	-0.920005	-0.677298	0.0605922	-0.598842	-0.489428	-0.374342	0.389331	0.483087	0.622861	0.680386	-1
CNN3	deaf	arco	x	-0.0450434	-0.8088	-0.718713	0.0626868	-0.677141	-0.515969	-0.429204	0.456357	0.533831	0.625611	0.701055	-1
CNN3	deaf	ra	stri	0.624911	0.454862	0.454862	-0.027828	-0.545918	-0.504601	-0.366295	0.268972	0.348731	0.39538	0.404809	1
CNN3	deaf	lman	stri	0.906091	0.663593	0.663593	0.00535286	-0.633382	-0.581547	-0.448471	0.342403	0.478528	0.608778	0.647405	1
CNN3	deaf	nido	stri	-0.121354	-0.920005	-0.677298	0.0605922	-0.598842	-0.489428	-0.374342	0.389331	0.483087	0.622861	0.680386	-1
CNOT3	deaf	x	arco	0.273667	-0.574596	-0.574596	-0.0144702	-0.592093	-0.53538	-0.475335	0.41273	0.504122	0.543706	0.668655	-1
CNOT3	deaf	arco	x	0.273667	-0.574596	-0.574596	-0.0144702	-0.592093	-0.53538	-0.475335	0.41273	0.504122	0.543706	0.668655	-1
CNTD1	deaf	x	ra	0.179841	-0.546559	-0.546559	0.0457778	-0.50468	-0.410197	-0.3653	0.449361	0.546842	0.56138	0.611786	-1
CNTD1	deaf	ncl	hvc	0.11767	-0.694807	-0.694807	0.0223926	-0.424812	-0.397032	-0.358032	0.4099	0.480501	0.524469	0.567484	-1
CNTD1	deaf	hvc	ncl	0.11767	-0.694807	-0.694807	0.0223926	-0.424812	-0.397032	-0.358032	0.4099	0.480501	0.524469	0.567484	-1
CNTD1	deaf	x	lman	-0.00976587	-0.635939	-0.616407	0.0303408	-0.59162	-0.481655	-0.4267	0.393754	0.46527	0.5214	0.600419	-1
CNTD1	deaf	ra	x	0.179841	-0.546559	-0.546559	0.0457778	-0.50468	-0.410197	-0.3653	0.449361	0.546842	0.56138	0.611786	-1
CNTD1	deaf	lman	x	-0.00976587	-0.635939	-0.616407	0.0303408	-0.59162	-0.481655	-0.4267	0.393754	0.46527	0.5214	0.600419	-1
CNTFR	deaf	stri	x	0.697653	0.587041	0.587041	0.0168652	-0.60744	-0.572222	-0.440744	0.37195	0.448802	0.494135	0.531075	1
CNTFR	deaf	x	stri	0.697653	0.587041	0.587041	0.0168652	-0.60744	-0.572222	-0.440744	0.37195	0.448802	0.494135	0.531075	1
CNTLN	deaf	nido	ra	-0.0206538	-0.704856	-0.663548	0.0596468	-0.570692	-0.548936	-0.501783	0.468724	0.606032	0.634934	0.732213	-1
CNTLN	deaf	x	ra	-0.575326	-0.524023	0.524023	-0.012939	-0.532115	-0.466797	-0.403816	0.248067	0.316742	0.429922	0.550991	1
CNTLN	deaf	x	lman	0.772878	0.551574	0.551574	0.00525739	-0.589273	-0.51853	-0.460533	0.328772	0.449416	0.526344	0.584085	1
CNTLN	deaf	ra	nido	-0.0206538	-0.704856	-0.663548	0.0596468	-0.570692	-0.548936	-0.501783	0.468724	0.606032	0.634934	0.732213	-1
CNTLN	deaf	ra	x	-0.575326	-0.524023	0.524023	-0.012939	-0.532115	-0.466797	-0.403816	0.248067	0.316742	0.429922	0.550991	1
CNTLN	deaf	lman	x	0.772878	0.551574	0.551574	0.00525739	-0.589273	-0.51853	-0.460533	0.328772	0.449416	0.526344	0.584085	1
CNTLN	deaf	stri	x	0.771363	0.79568	0.747045	-0.0208933	-0.521349	-0.469932	-0.41391	0.305427	0.399888	0.486566	0.584402	1
CNTLN	deaf	x	stri	0.771363	0.79568	0.747045	-0.0208933	-0.521349	-0.469932	-0.41391	0.305427	0.399888	0.486566	0.584402	1
CNTRL	deaf	nido	hvc	-0.741855	-0.874177	0.609533	0.0152664	-0.724932	-0.671457	-0.452975	0.352375	0.439088	0.503844	0.541439	1
CNTRL	deaf	hvc	nido	-0.741855	-0.874177	0.609533	0.0152664	-0.724932	-0.671457	-0.452975	0.352375	0.439088	0.503844	0.541439	1
COCH	deaf	arco	ra	0.618278	0.610644	0.610644	-0.0303239	-0.693271	-0.611906	-0.48805	0.269214	0.415897	0.5541	0.594652	1
COCH	deaf	ra	arco	0.618278	0.610644	0.610644	-0.0303239	-0.693271	-0.611906	-0.48805	0.269214	0.415897	0.5541	0.594652	1
COCH	deaf	nido	arco	-0.152504	-0.813001	-0.507993	0.0298538	-0.564449	-0.493248	-0.437877	0.47063	0.564542	0.624147	0.689522	-1
COCH	deaf	ncl	hvc	0.0181905	-0.669533	-0.669533	-0.0349065	-0.501137	-0.480694	-0.450111	0.323177	0.394495	0.462677	0.577559	-1
COCH	deaf	hvc	ncl	0.0181905	-0.669533	-0.669533	-0.0349065	-0.501137	-0.480694	-0.450111	0.323177	0.394495	0.462677	0.577559	-1
COCH	deaf	nido	ncl	-0.883188	-0.886244	0.880132	-0.0310929	-0.631251	-0.618412	-0.493835	0.329108	0.5377	0.653574	0.789309	1
COCH	deaf	arco	nido	-0.152504	-0.813001	-0.507993	0.0298538	-0.564449	-0.493248	-0.437877	0.47063	0.564542	0.624147	0.689522	-1
COCH	deaf	ncl	nido	-0.883188	-0.886244	0.880132	-0.0310929	-0.631251	-0.618412	-0.493835	0.329108	0.5377	0.653574	0.789309	1
COG3	deaf	arco	ra	0.0700194	-0.520344	-0.520344	0.00122578	-0.544671	-0.511131	-0.413247	0.286373	0.33941	0.504997	0.587312	-1
COG3	deaf	ra	arco	0.0700194	-0.520344	-0.520344	0.00122578	-0.544671	-0.511131	-0.413247	0.286373	0.33941	0.504997	0.587312	-1
COG3	deaf	hvc	arco	0.608509	0.568747	0.568747	-0.0484638	-0.56862	-0.49217	-0.447548	0.296565	0.416654	0.466961	0.513236	1
COG3	deaf	arco	hvc	0.608509	0.568747	0.568747	-0.0484638	-0.56862	-0.49217	-0.447548	0.296565	0.416654	0.466961	0.513236	1
COL23A1	deaf	nido	ra	0.129074	-0.629515	-0.629515	-0.0519321	-0.543744	-0.517726	-0.476156	0.281687	0.374872	0.416083	0.544813	-1
COL23A1	deaf	nido	arco	-0.0532666	-0.69083	-0.584296	0.0276101	-0.606396	-0.54522	-0.417291	0.46957	0.503661	0.549524	0.602812	-1
COL23A1	deaf	nido	hvc	0.0432119	-0.629448	-0.629448	0.00262728	-0.591122	-0.545286	-0.463528	0.365896	0.418595	0.46043	0.546925	-1
COL23A1	deaf	ra	nido	0.129074	-0.629515	-0.629515	-0.0519321	-0.543744	-0.517726	-0.476156	0.281687	0.374872	0.416083	0.544813	-1
COL23A1	deaf	arco	nido	-0.0532666	-0.69083	-0.584296	0.0276101	-0.606396	-0.54522	-0.417291	0.46957	0.503661	0.549524	0.602812	-1
COL23A1	deaf	hvc	nido	0.0432119	-0.629448	-0.629448	0.00262728	-0.591122	-0.545286	-0.463528	0.365896	0.418595	0.46043	0.546925	-1
COL6A3	deaf	nido	arco	-0.101368	-0.736595	-0.533859	0.0364107	-0.452952	-0.40489	-0.331586	0.366587	0.413778	0.45313	0.497515	-1
COL6A3	deaf	stri	lman	0.543543	0.519364	0.519364	0.021307	-0.557956	-0.519865	-0.488168	0.416233	0.466579	0.503079	0.549627	1
COL6A3	deaf	arco	nido	-0.101368	-0.736595	-0.533859	0.0364107	-0.452952	-0.40489	-0.331586	0.366587	0.413778	0.45313	0.497515	-1
COL6A3	deaf	lman	stri	0.543543	0.519364	0.519364	0.021307	-0.557956	-0.519865	-0.488168	0.416233	0.466579	0.503079	0.549627	1
COLGALT1	deaf	nido	arco	0.732356	0.517067	0.517067	-0.0243621	-0.690015	-0.602311	-0.472558	0.317753	0.360002	0.429285	0.46289	1
COLGALT1	deaf	arco	nido	0.732356	0.517067	0.517067	-0.0243621	-0.690015	-0.602311	-0.472558	0.317753	0.360002	0.429285	0.46289	1
COLGALT1	deaf	stri	x	0.747222	0.845463	0.648981	-0.0216807	-0.53446	-0.509545	-0.45635	0.348301	0.474934	0.504305	0.636142	1
COLGALT1	deaf	x	stri	0.747222	0.845463	0.648981	-0.0216807	-0.53446	-0.509545	-0.45635	0.348301	0.474934	0.504305	0.636142	1
COMTD1	deaf	lman	ra	0.637394	0.541599	0.541599	-0.00922119	-0.586264	-0.438298	-0.399644	0.281501	0.368347	0.465408	0.498501	1
COMTD1	deaf	hvc	arco	0.143724	-0.637361	-0.637361	0.0130903	-0.611535	-0.543263	-0.494927	0.406563	0.447767	0.495147	0.551506	-1
COMTD1	deaf	arco	hvc	0.143724	-0.637361	-0.637361	0.0130903	-0.611535	-0.543263	-0.494927	0.406563	0.447767	0.495147	0.551506	-1
COMTD1	deaf	ra	lman	0.637394	0.541599	0.541599	-0.00922119	-0.586264	-0.438298	-0.399644	0.281501	0.368347	0.465408	0.498501	1
COMTD1	deaf	stri	lman	0.684174	0.540775	0.540775	-0.0491067	-0.687157	-0.604762	-0.498711	0.271485	0.375181	0.446474	0.52263	1
COMTD1	deaf	stri	x	-0.0205749	-0.868	-0.82685	-0.0198918	-0.582067	-0.505975	-0.465227	0.384853	0.430787	0.472211	0.555466	-1
COMTD1	deaf	lman	stri	0.684174	0.540775	0.540775	-0.0491067	-0.687157	-0.604762	-0.498711	0.271485	0.375181	0.446474	0.52263	1
COMTD1	deaf	x	stri	-0.0205749	-0.868	-0.82685	-0.0198918	-0.582067	-0.505975	-0.465227	0.384853	0.430787	0.472211	0.555466	-1
COPS7A	deaf	ncl	ra	0.206662	-0.535963	-0.535963	0.0290074	-0.567763	-0.475629	-0.418498	0.422809	0.514064	0.550502	0.578951	-1
COPS7A	deaf	hvc	arco	0.212106	-0.538645	-0.538645	-0.0100053	-0.636226	-0.536041	-0.432949	0.311427	0.39914	0.519209	0.619615	-1
COPS7A	deaf	lman	arco	0.204074	-0.697001	-0.697001	-0.00112367	-0.440153	-0.407783	-0.377047	0.406985	0.544039	0.610543	0.640704	-1
COPS7A	deaf	x	arco	0.111413	-0.697922	-0.697922	0.00446507	-0.483231	-0.429444	-0.399118	0.305403	0.412471	0.489078	0.558789	-1
COPS7A	deaf	arco	hvc	0.212106	-0.538645	-0.538645	-0.0100053	-0.636226	-0.536041	-0.432949	0.311427	0.39914	0.519209	0.619615	-1
COPS7A	deaf	ra	ncl	0.206662	-0.535963	-0.535963	0.0290074	-0.567763	-0.475629	-0.418498	0.422809	0.514064	0.550502	0.578951	-1
COPS7A	deaf	nido	ncl	-0.149303	-0.813517	-0.514911	0.0091033	-0.514038	-0.508604	-0.425418	0.332294	0.414028	0.552621	0.652324	-1
COPS7A	deaf	arco	lman	0.204074	-0.697001	-0.697001	-0.00112367	-0.440153	-0.407783	-0.377047	0.406985	0.544039	0.610543	0.640704	-1
COPS7A	deaf	x	lman	0.135733	-0.64447	-0.64447	0.0333595	-0.630367	-0.599116	-0.491667	0.401593	0.496982	0.598577	0.714854	-1
COPS7A	deaf	ncl	nido	-0.149303	-0.813517	-0.514911	0.0091033	-0.514038	-0.508604	-0.425418	0.332294	0.414028	0.552621	0.652324	-1
COPS7A	deaf	arco	x	0.111413	-0.697922	-0.697922	0.00446507	-0.483231	-0.429444	-0.399118	0.305403	0.412471	0.489078	0.558789	-1
COPS7A	deaf	lman	x	0.135733	-0.64447	-0.64447	0.0333595	-0.630367	-0.599116	-0.491667	0.401593	0.496982	0.598577	0.714854	-1
COQ10B	deaf	x	ncl	0.842449	0.783645	0.783645	-0.0500041	-0.650276	-0.565397	-0.464108	0.263493	0.398438	0.455397	0.569347	1
COQ10B	deaf	ncl	x	0.842449	0.783645	0.783645	-0.0500041	-0.650276	-0.565397	-0.464108	0.263493	0.398438	0.455397	0.569347	1
COQ5	deaf	nido	ncl	0.0101744	-0.596533	-0.596533	0.0222148	-0.617711	-0.571529	-0.512626	0.359923	0.553203	0.608499	0.620329	-1
COQ5	deaf	ncl	nido	0.0101744	-0.596533	-0.596533	0.0222148	-0.617711	-0.571529	-0.512626	0.359923	0.553203	0.608499	0.620329	-1
COQ6	deaf	x	hvc	-0.0231531	-0.395107	-0.348801	0.103442	-0.479662	-0.347784	-0.288351	0.460843	0.530016	0.582522	0.680983	-1
COQ6	deaf	stri	nido	0.622548	0.563106	0.563106	-0.0609154	-0.573077	-0.558891	-0.53592	0.261416	0.335965	0.48903	0.515024	1
COQ6	deaf	hvc	x	-0.0231531	-0.395107	-0.348801	0.103442	-0.479662	-0.347784	-0.288351	0.460843	0.530016	0.582522	0.680983	-1
COQ6	deaf	nido	stri	0.622548	0.563106	0.563106	-0.0609154	-0.573077	-0.558891	-0.53592	0.261416	0.335965	0.48903	0.515024	1
CORT	deaf	nido	ra	0.0363544	-0.661385	-0.661385	0.0667688	-0.592649	-0.518007	-0.407877	0.417406	0.475481	0.536336	0.551823	-1
CORT	deaf	ncl	arco	0.289558	-0.633447	-0.633447	0.013303	-0.548394	-0.50598	-0.474719	0.37236	0.426634	0.494748	0.559109	-1
CORT	deaf	ncl	hvc	-0.0242522	-0.829949	-0.781445	0.0312737	-0.555901	-0.498013	-0.428186	0.352421	0.496826	0.552213	0.662654	-1
CORT	deaf	arco	ncl	0.289558	-0.633447	-0.633447	0.013303	-0.548394	-0.50598	-0.474719	0.37236	0.426634	0.494748	0.559109	-1
CORT	deaf	hvc	ncl	-0.0242522	-0.829949	-0.781445	0.0312737	-0.555901	-0.498013	-0.428186	0.352421	0.496826	0.552213	0.662654	-1
CORT	deaf	ra	nido	0.0363544	-0.661385	-0.661385	0.0667688	-0.592649	-0.518007	-0.407877	0.417406	0.475481	0.536336	0.551823	-1
COX11	deaf	lman	hvc	-0.0115406	0.553368	-0.553368	-0.0137874	-0.38918	-0.359769	-0.336343	0.324256	0.360922	0.462204	0.48852	-1
COX11	deaf	x	ncl	-0.251935	-0.897364	-0.393494	0.00270289	-0.426169	-0.385158	-0.317371	0.320471	0.39373	0.433239	0.491341	-1
COX11	deaf	hvc	lman	-0.0115406	0.553368	-0.553368	-0.0137874	-0.38918	-0.359769	-0.336343	0.324256	0.360922	0.462204	0.48852	-1
COX11	deaf	ncl	x	-0.251935	-0.897364	-0.393494	0.00270289	-0.426169	-0.385158	-0.317371	0.320471	0.39373	0.433239	0.491341	-1
CPEB2	deaf	hvc	ra	0.0887894	-0.620835	-0.620835	0.0246869	-0.581664	-0.481827	-0.419958	0.38564	0.486297	0.576141	0.647264	-1
CPEB2	deaf	nido	ra	-0.0580447	-0.713618	-0.597529	-0.0110121	-0.639533	-0.555657	-0.454377	0.324279	0.465357	0.514221	0.590777	-1
CPEB2	deaf	stri	ra	-0.33345	-1.16722	-0.500325	0.0785781	-0.368381	-0.33476	-0.253377	0.402758	0.471031	0.569627	0.584082	-1
CPEB2	deaf	stri	arco	0.107503	-0.616972	-0.616972	-0.0439262	-0.798608	-0.55175	-0.428156	0.278916	0.339853	0.540006	0.705057	-1
CPEB2	deaf	ra	hvc	0.0887894	-0.620835	-0.620835	0.0246869	-0.581664	-0.481827	-0.419958	0.38564	0.486297	0.576141	0.647264	-1
CPEB2	deaf	x	lman	0.0313987	-0.554265	-0.554265	0.00049245	-0.630336	-0.548873	-0.446088	0.303753	0.37649	0.546104	0.554569	-1
CPEB2	deaf	ra	nido	-0.0580447	-0.713618	-0.597529	-0.0110121	-0.639533	-0.555657	-0.454377	0.324279	0.465357	0.514221	0.590777	-1
CPEB2	deaf	stri	nido	0.0444135	-0.418638	-0.418638	0.0278365	-0.502367	-0.377178	-0.298891	0.362278	0.429534	0.482831	0.539836	-1
CPEB2	deaf	lman	x	0.0313987	-0.554265	-0.554265	0.00049245	-0.630336	-0.548873	-0.446088	0.303753	0.37649	0.546104	0.554569	-1
CPEB2	deaf	ra	stri	-0.33345	-1.16722	-0.500325	0.0785781	-0.368381	-0.33476	-0.253377	0.402758	0.471031	0.569627	0.584082	-1
CPEB2	deaf	arco	stri	0.107503	-0.616972	-0.616972	-0.0439262	-0.798608	-0.55175	-0.428156	0.278916	0.339853	0.540006	0.705057	-1
CPEB2	deaf	nido	stri	0.0444135	-0.418638	-0.418638	0.0278365	-0.502367	-0.377178	-0.298891	0.362278	0.429534	0.482831	0.539836	-1
CPLX3	deaf	hvc	arco	0.746693	0.51432	0.51432	-0.0450199	-0.763143	-0.633997	-0.541836	0.330608	0.356214	0.438113	0.463363	1
CPLX3	deaf	ncl	arco	0.0974803	-0.60152	-0.60152	-0.0403756	-0.629891	-0.489348	-0.367939	0.282427	0.374343	0.448225	0.51922	-1
CPLX3	deaf	arco	hvc	0.746693	0.51432	0.51432	-0.0450199	-0.763143	-0.633997	-0.541836	0.330608	0.356214	0.438113	0.463363	1
CPLX3	deaf	arco	ncl	0.0974803	-0.60152	-0.60152	-0.0403756	-0.629891	-0.489348	-0.367939	0.282427	0.374343	0.448225	0.51922	-1
CPNE2	deaf	stri	arco	-0.69568	-0.88987	0.501489	-0.0226386	-0.633775	-0.568957	-0.47074	0.322888	0.383608	0.460774	0.518748	1
CPNE2	deaf	arco	stri	-0.69568	-0.88987	0.501489	-0.0226386	-0.633775	-0.568957	-0.47074	0.322888	0.383608	0.460774	0.518748	1
CPNE7	deaf	arco	ra	0.0814644	-0.579583	-0.579583	-0.0610178	-0.571786	-0.456837	-0.422276	0.355823	0.403024	0.454018	0.456326	-1
CPNE7	deaf	ra	arco	0.0814644	-0.579583	-0.579583	-0.0610178	-0.571786	-0.456837	-0.422276	0.355823	0.403024	0.454018	0.456326	-1
CPNE7	deaf	ncl	hvc	0.691624	0.563634	0.563634	0.00734583	-0.59594	-0.493664	-0.444447	0.342302	0.498057	0.556122	0.637097	1
CPNE7	deaf	lman	hvc	-0.782924	-0.719888	0.719888	-0.0230753	-0.602422	-0.530482	-0.471427	0.258964	0.37026	0.424783	0.489192	1
CPNE7	deaf	hvc	ncl	0.691624	0.563634	0.563634	0.00734583	-0.59594	-0.493664	-0.444447	0.342302	0.498057	0.556122	0.637097	1
CPNE7	deaf	hvc	lman	-0.782924	-0.719888	0.719888	-0.0230753	-0.602422	-0.530482	-0.471427	0.258964	0.37026	0.424783	0.489192	1
CPSF7	deaf	hvc	ra	-0.0531116	0.518934	-0.518934	-0.0134701	-0.529251	-0.512664	-0.49171	0.335742	0.457109	0.520514	0.552278	-1
CPSF7	deaf	nido	arco	-0.0507676	0.598636	-0.598636	-0.0263574	-0.627215	-0.511492	-0.469971	0.379392	0.485168	0.5179	0.529439	-1
CPSF7	deaf	ra	hvc	-0.0531116	0.518934	-0.518934	-0.0134701	-0.529251	-0.512664	-0.49171	0.335742	0.457109	0.520514	0.552278	-1
CPSF7	deaf	arco	nido	-0.0507676	0.598636	-0.598636	-0.0263574	-0.627215	-0.511492	-0.469971	0.379392	0.485168	0.5179	0.529439	-1
CRABP1	deaf	hvc	arco	-0.204676	-1.04084	-0.631484	-0.0184487	-0.61058	-0.547793	-0.406839	0.301206	0.398031	0.452162	0.571285	-1
CRABP1	deaf	x	arco	0.687005	0.638089	0.638089	0.00138752	-0.514907	-0.470836	-0.426718	0.372846	0.478502	0.550329	0.579594	1
CRABP1	deaf	arco	hvc	-0.204676	-1.04084	-0.631484	-0.0184487	-0.61058	-0.547793	-0.406839	0.301206	0.398031	0.452162	0.571285	-1
CRABP1	deaf	nido	lman	0.567605	0.538122	0.538122	-0.019119	-0.680593	-0.574915	-0.474197	0.319852	0.391192	0.447328	0.492145	1
CRABP1	deaf	lman	nido	0.567605	0.538122	0.538122	-0.019119	-0.680593	-0.574915	-0.474197	0.319852	0.391192	0.447328	0.492145	1
CRABP1	deaf	arco	x	0.687005	0.638089	0.638089	0.00138752	-0.514907	-0.470836	-0.426718	0.372846	0.478502	0.550329	0.579594	1
CRCP	deaf	nido	ra	-0.163994	-0.954897	-0.626909	0.0398836	-0.586866	-0.534266	-0.45553	0.44622	0.487744	0.569478	0.66914	-1
CRCP	deaf	x	ra	0.183308	-0.536274	-0.536274	-0.0301887	-0.620046	-0.496065	-0.390989	0.258446	0.348995	0.364935	0.438895	-1
CRCP	deaf	stri	ra	0.185685	-0.507909	-0.507909	0.0573085	-0.442245	-0.397207	-0.357361	0.365254	0.494091	0.519254	0.541414	-1
CRCP	deaf	ncl	arco	0.142041	-0.632098	-0.632098	-0.0239385	-0.608765	-0.602134	-0.586703	0.344747	0.412184	0.531827	0.584637	-1
CRCP	deaf	arco	ncl	0.142041	-0.632098	-0.632098	-0.0239385	-0.608765	-0.602134	-0.586703	0.344747	0.412184	0.531827	0.584637	-1
CRCP	deaf	nido	lman	-0.211328	-1.0882	-0.665545	-0.0137794	-0.60088	-0.529375	-0.470327	0.294148	0.456008	0.53505	0.616086	-1
CRCP	deaf	ra	nido	-0.163994	-0.954897	-0.626909	0.0398836	-0.586866	-0.534266	-0.45553	0.44622	0.487744	0.569478	0.66914	-1
CRCP	deaf	lman	nido	-0.211328	-1.0882	-0.665545	-0.0137794	-0.60088	-0.529375	-0.470327	0.294148	0.456008	0.53505	0.616086	-1
CRCP	deaf	ra	x	0.183308	-0.536274	-0.536274	-0.0301887	-0.620046	-0.496065	-0.390989	0.258446	0.348995	0.364935	0.438895	-1
CRCP	deaf	ra	stri	0.185685	-0.507909	-0.507909	0.0573085	-0.442245	-0.397207	-0.357361	0.365254	0.494091	0.519254	0.541414	-1
CREB5	deaf	hvc	arco	0.635192	0.609324	0.609324	-0.020124	-0.566029	-0.533544	-0.476595	0.318362	0.459278	0.549742	0.5657	1
CREB5	deaf	ncl	arco	0.734092	0.655866	0.655866	-0.0426671	-0.749434	-0.615974	-0.554088	0.392278	0.443884	0.531046	0.590157	1
CREB5	deaf	nido	arco	0.842631	0.82085	0.82085	-0.00866365	-0.619213	-0.592301	-0.493111	0.348743	0.502929	0.519138	0.65228	1
CREB5	deaf	arco	hvc	0.635192	0.609324	0.609324	-0.020124	-0.566029	-0.533544	-0.476595	0.318362	0.459278	0.549742	0.5657	1
CREB5	deaf	nido	hvc	0.861742	0.724481	0.724481	-0.0210056	-0.536366	-0.515356	-0.419989	0.338504	0.440693	0.499161	0.541097	1
CREB5	deaf	arco	ncl	0.734092	0.655866	0.655866	-0.0426671	-0.749434	-0.615974	-0.554088	0.392278	0.443884	0.531046	0.590157	1
CREB5	deaf	arco	nido	0.842631	0.82085	0.82085	-0.00866365	-0.619213	-0.592301	-0.493111	0.348743	0.502929	0.519138	0.65228	1
CREB5	deaf	hvc	nido	0.861742	0.724481	0.724481	-0.0210056	-0.536366	-0.515356	-0.419989	0.338504	0.440693	0.499161	0.541097	1
CREM	deaf	ncl	ra	0.684143	0.578573	0.578573	-0.017117	-0.663064	-0.601251	-0.479947	0.320554	0.437302	0.545525	0.586209	1
CREM	deaf	ra	ncl	0.684143	0.578573	0.578573	-0.017117	-0.663064	-0.601251	-0.479947	0.320554	0.437302	0.545525	0.586209	1
CRH	deaf	stri	lman	-9.36549e-05	-0.627639	-0.627452	0.0248335	-0.478985	-0.436875	-0.38629	0.331457	0.426258	0.46121	0.528759	-1
CRH	deaf	lman	stri	-9.36549e-05	-0.627639	-0.627452	0.0248335	-0.478985	-0.436875	-0.38629	0.331457	0.426258	0.46121	0.528759	-1
CRHBP	deaf	arco	ra	0.155269	-0.593467	-0.593467	0.0528622	-0.505898	-0.392265	-0.2973	0.404285	0.552333	0.611848	0.624366	-1
CRHBP	deaf	ra	arco	0.155269	-0.593467	-0.593467	0.0528622	-0.505898	-0.392265	-0.2973	0.404285	0.552333	0.611848	0.624366	-1
CRHBP	deaf	lman	hvc	0.0728426	-0.65532	-0.65532	-0.0341279	-0.641139	-0.597537	-0.554805	0.327163	0.495512	0.552192	0.569137	-1
CRHBP	deaf	nido	hvc	0.0257688	-0.621297	-0.621297	0.04198	-0.470984	-0.415153	-0.353127	0.430904	0.543158	0.621447	0.657641	-1
CRHBP	deaf	stri	hvc	0.600094	0.700569	0.499618	0.00799832	-0.537689	-0.451395	-0.398288	0.400582	0.472061	0.490639	0.508832	1
CRHBP	deaf	hvc	lman	0.0728426	-0.65532	-0.65532	-0.0341279	-0.641139	-0.597537	-0.554805	0.327163	0.495512	0.552192	0.569137	-1
CRHBP	deaf	hvc	nido	0.0257688	-0.621297	-0.621297	0.04198	-0.470984	-0.415153	-0.353127	0.430904	0.543158	0.621447	0.657641	-1
CRHBP	deaf	x	nido	-0.806319	-0.941519	0.671118	-0.0249627	-0.490343	-0.468525	-0.436119	0.315876	0.423077	0.480271	0.600815	1
CRHBP	deaf	nido	x	-0.806319	-0.941519	0.671118	-0.0249627	-0.490343	-0.468525	-0.436119	0.315876	0.423077	0.480271	0.600815	1
CRHBP	deaf	hvc	stri	0.600094	0.700569	0.499618	0.00799832	-0.537689	-0.451395	-0.398288	0.400582	0.472061	0.490639	0.508832	1
CRHR2	deaf	nido	lman	0.323279	-0.642819	-0.642819	-0.000336776	-0.539817	-0.512686	-0.420914	0.363854	0.446637	0.512831	0.538675	-1
CRHR2	deaf	lman	nido	0.323279	-0.642819	-0.642819	-0.000336776	-0.539817	-0.512686	-0.420914	0.363854	0.446637	0.512831	0.538675	-1
CRIP1	deaf	nido	ra	0.326244	-0.553397	-0.553397	0.00615136	-0.576641	-0.552365	-0.479441	0.430401	0.507305	0.559843	0.764004	-1
CRIP1	deaf	lman	arco	-0.0673185	-0.936587	-0.80195	-0.0575832	-0.726265	-0.697905	-0.617153	0.285203	0.435686	0.456364	0.497644	-1
CRIP1	deaf	nido	arco	0.831457	0.91072	0.752193	0.00556137	-0.603338	-0.524076	-0.444769	0.326094	0.441635	0.553284	0.729469	1
CRIP1	deaf	lman	hvc	0.0018852	-0.491155	-0.491155	0.0380331	-0.612123	-0.450464	-0.37419	0.389525	0.537549	0.581831	0.623419	-1
CRIP1	deaf	stri	ncl	0.822833	0.839291	0.806375	0.0328672	-0.551632	-0.474269	-0.435572	0.358964	0.506738	0.545095	0.554004	1
CRIP1	deaf	arco	lman	-0.0673185	-0.936587	-0.80195	-0.0575832	-0.726265	-0.697905	-0.617153	0.285203	0.435686	0.456364	0.497644	-1
CRIP1	deaf	hvc	lman	0.0018852	-0.491155	-0.491155	0.0380331	-0.612123	-0.450464	-0.37419	0.389525	0.537549	0.581831	0.623419	-1
CRIP1	deaf	ra	nido	0.326244	-0.553397	-0.553397	0.00615136	-0.576641	-0.552365	-0.479441	0.430401	0.507305	0.559843	0.764004	-1
CRIP1	deaf	arco	nido	0.831457	0.91072	0.752193	0.00556137	-0.603338	-0.524076	-0.444769	0.326094	0.441635	0.553284	0.729469	1
CRIP1	deaf	ncl	stri	0.822833	0.839291	0.806375	0.0328672	-0.551632	-0.474269	-0.435572	0.358964	0.506738	0.545095	0.554004	1
CROT	deaf	hvc	ra	0.108038	-0.741284	-0.741284	-0.00561211	-0.690408	-0.572419	-0.358688	0.319434	0.406623	0.52528	0.58839	-1
CROT	deaf	x	ra	0.0509779	-0.702777	-0.702777	-0.0266041	-0.551631	-0.544642	-0.454819	0.329831	0.454802	0.569195	0.618084	-1
CROT	deaf	ra	hvc	0.108038	-0.741284	-0.741284	-0.00561211	-0.690408	-0.572419	-0.358688	0.319434	0.406623	0.52528	0.58839	-1
CROT	deaf	nido	ncl	-0.775452	-0.516013	0.516013	0.0403078	-0.507672	-0.41616	-0.322189	0.410832	0.452322	0.491141	0.575607	1
CROT	deaf	ncl	nido	-0.775452	-0.516013	0.516013	0.0403078	-0.507672	-0.41616	-0.322189	0.410832	0.452322	0.491141	0.575607	1
CROT	deaf	ra	x	0.0509779	-0.702777	-0.702777	-0.0266041	-0.551631	-0.544642	-0.454819	0.329831	0.454802	0.569195	0.618084	-1
CROT	deaf	stri	x	0.901555	0.665567	0.665567	-0.0169053	-0.812005	-0.686675	-0.522656	0.317708	0.379066	0.506117	0.580135	1
CROT	deaf	x	stri	0.901555	0.665567	0.665567	-0.0169053	-0.812005	-0.686675	-0.522656	0.317708	0.379066	0.506117	0.580135	1
CRYL1	deaf	arco	ra	0.814116	1.01623	0.612	-0.0144795	-0.538998	-0.514262	-0.407945	0.339229	0.393352	0.482411	0.499644	1
CRYL1	deaf	ra	arco	0.814116	1.01623	0.612	-0.0144795	-0.538998	-0.514262	-0.407945	0.339229	0.393352	0.482411	0.499644	1
CRYL1	deaf	stri	arco	-0.0651447	-0.72104	-0.59075	-0.0177452	-0.531169	-0.505601	-0.471465	0.272272	0.337841	0.435326	0.517446	-1
CRYL1	deaf	stri	hvc	0.024239	-0.743116	-0.743116	0.0295572	-0.437388	-0.412251	-0.349261	0.374778	0.492945	0.529945	0.597502	-1
CRYL1	deaf	x	nido	0.799866	0.737065	0.737065	0.0166987	-0.539919	-0.482553	-0.420804	0.399618	0.494377	0.515133	0.559742	1
CRYL1	deaf	nido	x	0.799866	0.737065	0.737065	0.0166987	-0.539919	-0.482553	-0.420804	0.399618	0.494377	0.515133	0.559742	1
CRYL1	deaf	arco	stri	-0.0651447	-0.72104	-0.59075	-0.0177452	-0.531169	-0.505601	-0.471465	0.272272	0.337841	0.435326	0.517446	-1
CRYL1	deaf	hvc	stri	0.024239	-0.743116	-0.743116	0.0295572	-0.437388	-0.412251	-0.349261	0.374778	0.492945	0.529945	0.597502	-1
CSNK2A2	deaf	nido	lman	-0.690777	-0.645862	0.645862	-0.017984	-0.590712	-0.526478	-0.477507	0.347643	0.464562	0.577964	0.685298	1
CSNK2A2	deaf	x	lman	0.0938077	-0.692638	-0.692638	0.0252455	-0.497763	-0.427956	-0.395331	0.32827	0.413582	0.464049	0.493618	-1
CSNK2A2	deaf	lman	nido	-0.690777	-0.645862	0.645862	-0.017984	-0.590712	-0.526478	-0.477507	0.347643	0.464562	0.577964	0.685298	1
CSNK2A2	deaf	lman	x	0.0938077	-0.692638	-0.692638	0.0252455	-0.497763	-0.427956	-0.395331	0.32827	0.413582	0.464049	0.493618	-1
CSRP1	deaf	hvc	arco	0.318755	-0.486764	-0.486764	0.0347158	-0.451138	-0.415947	-0.373752	0.429697	0.556541	0.59059	0.606757	-1
CSRP1	deaf	ncl	arco	0.267799	-0.535193	-0.535193	0.0436648	-0.456678	-0.41882	-0.367026	0.419445	0.483495	0.587445	0.627334	-1
CSRP1	deaf	arco	hvc	0.318755	-0.486764	-0.486764	0.0347158	-0.451138	-0.415947	-0.373752	0.429697	0.556541	0.59059	0.606757	-1
CSRP1	deaf	ncl	hvc	-0.0708808	-0.762746	-0.620984	-0.0287945	-0.627574	-0.607515	-0.545647	0.315347	0.450248	0.474501	0.495085	-1
CSRP1	deaf	arco	ncl	0.267799	-0.535193	-0.535193	0.0436648	-0.456678	-0.41882	-0.367026	0.419445	0.483495	0.587445	0.627334	-1
CSRP1	deaf	hvc	ncl	-0.0708808	-0.762746	-0.620984	-0.0287945	-0.627574	-0.607515	-0.545647	0.315347	0.450248	0.474501	0.495085	-1
CSRP1	deaf	stri	x	0.123342	-0.525766	-0.525766	-0.0326066	-0.619711	-0.525661	-0.518913	0.269162	0.332352	0.375925	0.476602	-1
CSRP1	deaf	x	stri	0.123342	-0.525766	-0.525766	-0.0326066	-0.619711	-0.525661	-0.518913	0.269162	0.332352	0.375925	0.476602	-1
CTC1	deaf	stri	ncl	0.526791	0.48763	0.48763	-0.0133284	-0.504701	-0.485704	-0.450286	0.320911	0.367393	0.381694	0.488143	1
CTC1	deaf	ncl	stri	0.526791	0.48763	0.48763	-0.0133284	-0.504701	-0.485704	-0.450286	0.320911	0.367393	0.381694	0.488143	1
CTSO	deaf	stri	ra	0.577995	0.557327	0.557327	-0.0416264	-0.659569	-0.609802	-0.493645	0.309099	0.359529	0.52451	0.667128	1
CTSO	deaf	stri	hvc	0.718747	0.84256	0.594933	-0.0224115	-0.627656	-0.603047	-0.556429	0.356693	0.414084	0.463724	0.500336	1
CTSO	deaf	ra	stri	0.577995	0.557327	0.557327	-0.0416264	-0.659569	-0.609802	-0.493645	0.309099	0.359529	0.52451	0.667128	1
CTSO	deaf	hvc	stri	0.718747	0.84256	0.594933	-0.0224115	-0.627656	-0.603047	-0.556429	0.356693	0.414084	0.463724	0.500336	1
CUL9	deaf	hvc	arco	0.731221	0.833517	0.628924	0.0133657	-0.5338	-0.526181	-0.432117	0.354586	0.466925	0.536848	0.557849	1
CUL9	deaf	stri	arco	0.232256	-0.587293	-0.587293	-0.0116554	-0.535379	-0.525551	-0.504615	0.403298	0.484834	0.567407	0.583222	-1
CUL9	deaf	arco	hvc	0.731221	0.833517	0.628924	0.0133657	-0.5338	-0.526181	-0.432117	0.354586	0.466925	0.536848	0.557849	1
CUL9	deaf	stri	lman	-0.010836	-0.573013	-0.551341	0.041482	-0.518411	-0.47676	-0.416789	0.438839	0.540336	0.610182	0.707061	-1
CUL9	deaf	arco	stri	0.232256	-0.587293	-0.587293	-0.0116554	-0.535379	-0.525551	-0.504615	0.403298	0.484834	0.567407	0.583222	-1
CUL9	deaf	lman	stri	-0.010836	-0.573013	-0.551341	0.041482	-0.518411	-0.47676	-0.416789	0.438839	0.540336	0.610182	0.707061	-1
CUNH12orf43	deaf	x	ncl	0.878521	0.6193	0.6193	-0.010499	-0.669295	-0.610515	-0.585577	0.337751	0.474191	0.560136	0.66191	1
CUNH12orf43	deaf	ncl	x	0.878521	0.6193	0.6193	-0.010499	-0.669295	-0.610515	-0.585577	0.337751	0.474191	0.560136	0.66191	1
CUNH15orf62	deaf	lman	arco	0.765869	0.713635	0.713635	0.0175288	-0.518767	-0.491081	-0.475696	0.41323	0.498085	0.531919	0.606572	1
CUNH15orf62	deaf	stri	ncl	-0.159094	-0.85983	-0.541643	0.0285556	-0.530781	-0.494594	-0.411375	0.390033	0.435289	0.552135	0.594538	-1
CUNH15orf62	deaf	arco	lman	0.765869	0.713635	0.713635	0.0175288	-0.518767	-0.491081	-0.475696	0.41323	0.498085	0.531919	0.606572	1
CUNH15orf62	deaf	stri	x	0.102501	-0.451851	-0.451851	0.00408579	-0.625746	-0.434054	-0.412894	0.325236	0.378032	0.51491	0.592904	-1
CUNH15orf62	deaf	ncl	stri	-0.159094	-0.85983	-0.541643	0.0285556	-0.530781	-0.494594	-0.411375	0.390033	0.435289	0.552135	0.594538	-1
CUNH15orf62	deaf	x	stri	0.102501	-0.451851	-0.451851	0.00408579	-0.625746	-0.434054	-0.412894	0.325236	0.378032	0.51491	0.592904	-1
CUNH18orf8	deaf	arco	ra	0.153585	-0.468472	-0.468472	0.0185535	-0.487003	-0.451413	-0.396598	0.407943	0.481092	0.562709	0.58104	-1
CUNH18orf8	deaf	stri	ra	-0.27906	-1.10664	-0.548519	-0.0347986	-0.551522	-0.525099	-0.506181	0.284268	0.355696	0.440442	0.540777	-1
CUNH18orf8	deaf	ra	arco	0.153585	-0.468472	-0.468472	0.0185535	-0.487003	-0.451413	-0.396598	0.407943	0.481092	0.562709	0.58104	-1
CUNH18orf8	deaf	ncl	arco	0.628105	0.522702	0.522702	-0.0136637	-0.564574	-0.559864	-0.51322	0.403799	0.493287	0.503438	0.525269	1
CUNH18orf8	deaf	lman	arco	0.147204	-0.684983	-0.684983	0.00500141	-0.659653	-0.580409	-0.467842	0.389625	0.541186	0.555768	0.67158	-1
CUNH18orf8	deaf	arco	ncl	0.628105	0.522702	0.522702	-0.0136637	-0.564574	-0.559864	-0.51322	0.403799	0.493287	0.503438	0.525269	1
CUNH18orf8	deaf	arco	lman	0.147204	-0.684983	-0.684983	0.00500141	-0.659653	-0.580409	-0.467842	0.389625	0.541186	0.555768	0.67158	-1
CUNH18orf8	deaf	ra	stri	-0.27906	-1.10664	-0.548519	-0.0347986	-0.551522	-0.525099	-0.506181	0.284268	0.355696	0.440442	0.540777	-1
CUNH2orf40	deaf	arco	ra	0.0353368	-0.848636	-0.848636	0.05562	-0.804877	-0.77079	-0.673046	0.444938	0.532796	0.625601	0.66891	-1
CUNH2orf40	deaf	ra	arco	0.0353368	-0.848636	-0.848636	0.05562	-0.804877	-0.77079	-0.673046	0.444938	0.532796	0.625601	0.66891	-1
CUNH2orf40	deaf	nido	lman	0.0271446	-0.753236	-0.753236	-0.00884163	-0.659529	-0.504572	-0.467248	0.388755	0.438301	0.582209	0.676602	-1
CUNH2orf40	deaf	lman	nido	0.0271446	-0.753236	-0.753236	-0.00884163	-0.659529	-0.504572	-0.467248	0.388755	0.438301	0.582209	0.676602	-1
CUNH2orf40	deaf	stri	x	0.767068	0.637837	0.637837	0.0468526	-0.592262	-0.541186	-0.474768	0.468824	0.597134	0.615244	0.74236	1
CUNH2orf40	deaf	x	stri	0.767068	0.637837	0.637837	0.0468526	-0.592262	-0.541186	-0.474768	0.468824	0.597134	0.615244	0.74236	1
CUNH3orf58	deaf	nido	hvc	0.0701291	-0.553436	-0.553436	0.0127339	-0.528929	-0.507431	-0.418876	0.358179	0.438124	0.549812	0.670403	-1
CUNH3orf58	deaf	hvc	nido	0.0701291	-0.553436	-0.553436	0.0127339	-0.528929	-0.507431	-0.418876	0.358179	0.438124	0.549812	0.670403	-1
CUNH5orf49	deaf	stri	ra	0.323663	-0.438856	-0.438856	0.0492085	-0.438043	-0.389848	-0.362141	0.388122	0.479452	0.542812	0.597304	-1
CUNH5orf49	deaf	stri	x	0.724418	0.527858	0.527858	0.00731674	-0.567675	-0.499316	-0.445862	0.352335	0.430853	0.506785	0.550125	1
CUNH5orf49	deaf	ra	stri	0.323663	-0.438856	-0.438856	0.0492085	-0.438043	-0.389848	-0.362141	0.388122	0.479452	0.542812	0.597304	-1
CUNH5orf49	deaf	x	stri	0.724418	0.527858	0.527858	0.00731674	-0.567675	-0.499316	-0.445862	0.352335	0.430853	0.506785	0.550125	1
CUNH5orf63	deaf	nido	ra	0.263327	-0.595549	-0.595549	0.0476182	-0.568419	-0.476974	-0.420923	0.386792	0.5001	0.563526	0.57691	-1
CUNH5orf63	deaf	nido	arco	0.189121	-0.64438	-0.64438	0.0599842	-0.650502	-0.605449	-0.460733	0.412085	0.557596	0.626404	0.750582	-1
CUNH5orf63	deaf	x	hvc	-0.00238875	-0.662139	-0.657361	-0.0106689	-0.649897	-0.539987	-0.504507	0.366539	0.43387	0.581357	0.589125	-1
CUNH5orf63	deaf	nido	lman	0.00200063	-0.564463	-0.564463	0.0150696	-0.529639	-0.497608	-0.422748	0.370499	0.441651	0.543579	0.690354	-1
CUNH5orf63	deaf	ra	nido	0.263327	-0.595549	-0.595549	0.0476182	-0.568419	-0.476974	-0.420923	0.386792	0.5001	0.563526	0.57691	-1
CUNH5orf63	deaf	arco	nido	0.189121	-0.64438	-0.64438	0.0599842	-0.650502	-0.605449	-0.460733	0.412085	0.557596	0.626404	0.750582	-1
CUNH5orf63	deaf	lman	nido	0.00200063	-0.564463	-0.564463	0.0150696	-0.529639	-0.497608	-0.422748	0.370499	0.441651	0.543579	0.690354	-1
CUNH5orf63	deaf	hvc	x	-0.00238875	-0.662139	-0.657361	-0.0106689	-0.649897	-0.539987	-0.504507	0.366539	0.43387	0.581357	0.589125	-1
CUNH6orf89	deaf	nido	ra	-0.0598221	-0.882246	-0.762602	-0.025801	-0.594085	-0.541736	-0.475981	0.336602	0.4524	0.529634	0.625007	-1
CUNH6orf89	deaf	lman	arco	0.14395	-0.590475	-0.590475	0.010892	-0.428828	-0.402556	-0.346139	0.327152	0.410777	0.478346	0.5667	-1
CUNH6orf89	deaf	x	arco	-0.218319	-1.03485	-0.598208	-0.0291683	-0.632028	-0.575891	-0.487888	0.316241	0.511378	0.629796	0.653221	-1
CUNH6orf89	deaf	stri	hvc	0.863713	0.615452	0.615452	-0.0378565	-0.576068	-0.554461	-0.49107	0.33447	0.409291	0.455664	0.627255	1
CUNH6orf89	deaf	arco	lman	0.14395	-0.590475	-0.590475	0.010892	-0.428828	-0.402556	-0.346139	0.327152	0.410777	0.478346	0.5667	-1
CUNH6orf89	deaf	ra	nido	-0.0598221	-0.882246	-0.762602	-0.025801	-0.594085	-0.541736	-0.475981	0.336602	0.4524	0.529634	0.625007	-1
CUNH6orf89	deaf	x	nido	0.0776016	-0.631511	-0.631511	0.02378	-0.526659	-0.503906	-0.354356	0.425731	0.476478	0.57952	0.638099	-1
CUNH6orf89	deaf	arco	x	-0.218319	-1.03485	-0.598208	-0.0291683	-0.632028	-0.575891	-0.487888	0.316241	0.511378	0.629796	0.653221	-1
CUNH6orf89	deaf	nido	x	0.0776016	-0.631511	-0.631511	0.02378	-0.526659	-0.503906	-0.354356	0.425731	0.476478	0.57952	0.638099	-1
CUNH6orf89	deaf	hvc	stri	0.863713	0.615452	0.615452	-0.0378565	-0.576068	-0.554461	-0.49107	0.33447	0.409291	0.455664	0.627255	1
CUNH8orf82	deaf	hvc	ra	0.0206816	-0.487146	-0.487146	0.0383531	-0.51895	-0.464018	-0.37066	0.441301	0.514521	0.547137	0.565492	-1
CUNH8orf82	deaf	lman	ra	0.857196	1.05144	0.662957	-0.0676746	-0.563839	-0.487743	-0.442822	0.233605	0.391322	0.611859	0.70049	1
CUNH8orf82	deaf	x	ra	0.759653	0.96372	0.555586	-0.0045449	-0.554988	-0.546698	-0.430115	0.333905	0.405238	0.475818	0.527998	1
CUNH8orf82	deaf	stri	arco	0.00125384	-0.635136	-0.635136	0.0358119	-0.603813	-0.544962	-0.488299	0.471863	0.529486	0.587536	0.642116	-1
CUNH8orf82	deaf	ra	hvc	0.0206816	-0.487146	-0.487146	0.0383531	-0.51895	-0.464018	-0.37066	0.441301	0.514521	0.547137	0.565492	-1
CUNH8orf82	deaf	ra	lman	0.857196	1.05144	0.662957	-0.0676746	-0.563839	-0.487743	-0.442822	0.233605	0.391322	0.611859	0.70049	1
CUNH8orf82	deaf	ra	x	0.759653	0.96372	0.555586	-0.0045449	-0.554988	-0.546698	-0.430115	0.333905	0.405238	0.475818	0.527998	1
CUNH8orf82	deaf	arco	stri	0.00125384	-0.635136	-0.635136	0.0358119	-0.603813	-0.544962	-0.488299	0.471863	0.529486	0.587536	0.642116	-1
CUX2	deaf	ncl	hvc	-0.116362	-0.886034	-0.653311	-0.0270146	-0.609234	-0.527788	-0.482443	0.340787	0.414217	0.461125	0.703977	-1
CUX2	deaf	hvc	ncl	-0.116362	-0.886034	-0.653311	-0.0270146	-0.609234	-0.527788	-0.482443	0.340787	0.414217	0.461125	0.703977	-1
CUX2	deaf	x	ncl	0.559328	0.561742	0.556913	-0.0157501	-0.62347	-0.617564	-0.574414	0.402858	0.505571	0.538608	0.624786	1
CUX2	deaf	stri	nido	0.00894013	0.544286	-0.526406	0.0612679	-0.560851	-0.49102	-0.420611	0.42122	0.456891	0.545723	0.650166	-1
CUX2	deaf	ncl	x	0.559328	0.561742	0.556913	-0.0157501	-0.62347	-0.617564	-0.574414	0.402858	0.505571	0.538608	0.624786	1
CUX2	deaf	nido	stri	0.00894013	0.544286	-0.526406	0.0612679	-0.560851	-0.49102	-0.420611	0.42122	0.456891	0.545723	0.650166	-1
CXADR	deaf	x	ra	0.789257	0.940842	0.637672	-0.00442079	-0.718588	-0.611634	-0.417003	0.412686	0.558496	0.615546	0.658594	1
CXADR	deaf	lman	arco	0.016686	-0.765254	-0.765254	0.0210015	-0.561373	-0.527206	-0.482862	0.401029	0.470219	0.590758	0.691421	-1
CXADR	deaf	lman	ncl	-0.833373	-0.674462	0.674462	-0.0367439	-0.627686	-0.603406	-0.536615	0.36909	0.528812	0.574851	0.597431	1
CXADR	deaf	arco	lman	0.016686	-0.765254	-0.765254	0.0210015	-0.561373	-0.527206	-0.482862	0.401029	0.470219	0.590758	0.691421	-1
CXADR	deaf	ncl	lman	-0.833373	-0.674462	0.674462	-0.0367439	-0.627686	-0.603406	-0.536615	0.36909	0.528812	0.574851	0.597431	1
CXADR	deaf	ra	x	0.789257	0.940842	0.637672	-0.00442079	-0.718588	-0.611634	-0.417003	0.412686	0.558496	0.615546	0.658594	1
CXORF40A	deaf	ncl	arco	-0.141713	-1.03888	-0.755453	-0.0184247	-0.712204	-0.587906	-0.421766	0.362618	0.403851	0.515259	0.62036	-1
CXORF40A	deaf	x	arco	0.0171436	-0.465367	-0.465367	0.00587382	-0.513587	-0.465196	-0.451373	0.310078	0.36181	0.517296	0.580269	-1
CXORF40A	deaf	arco	ncl	-0.141713	-1.03888	-0.755453	-0.0184247	-0.712204	-0.587906	-0.421766	0.362618	0.403851	0.515259	0.62036	-1
CXORF40A	deaf	nido	lman	0.587846	0.586601	0.586601	0.0341971	-0.68336	-0.488436	-0.326817	0.327656	0.440856	0.490575	0.507181	1
CXORF40A	deaf	lman	nido	0.587846	0.586601	0.586601	0.0341971	-0.68336	-0.488436	-0.326817	0.327656	0.440856	0.490575	0.507181	1
CXORF40A	deaf	x	nido	0.109505	-0.632961	-0.632961	-0.0279351	-0.618875	-0.572822	-0.475749	0.366453	0.419917	0.606115	0.656469	-1
CXORF40A	deaf	arco	x	0.0171436	-0.465367	-0.465367	0.00587382	-0.513587	-0.465196	-0.451373	0.310078	0.36181	0.517296	0.580269	-1
CXORF40A	deaf	nido	x	0.109505	-0.632961	-0.632961	-0.0279351	-0.618875	-0.572822	-0.475749	0.366453	0.419917	0.606115	0.656469	-1
CYB561A3	deaf	hvc	arco	0.00929423	-0.725784	-0.725784	0.0495798	-0.499409	-0.44373	-0.312325	0.406925	0.464487	0.476737	0.581471	-1
CYB561A3	deaf	ncl	arco	-0.0264149	-0.636212	-0.583382	-0.000208211	-0.550236	-0.510046	-0.450951	0.399421	0.484246	0.512983	0.597013	-1
CYB561A3	deaf	arco	hvc	0.00929423	-0.725784	-0.725784	0.0495798	-0.499409	-0.44373	-0.312325	0.406925	0.464487	0.476737	0.581471	-1
CYB561A3	deaf	arco	ncl	-0.0264149	-0.636212	-0.583382	-0.000208211	-0.550236	-0.510046	-0.450951	0.399421	0.484246	0.512983	0.597013	-1
CYP46A1	deaf	arco	ra	-0.0888925	-0.847342	-0.669557	-0.0134388	-0.56734	-0.509248	-0.469793	0.312518	0.450186	0.643977	0.716969	-1
CYP46A1	deaf	lman	ra	-0.00356261	-0.513805	-0.506679	0.0478779	-0.478949	-0.454227	-0.43223	0.424696	0.512737	0.556141	0.613	-1
CYP46A1	deaf	ra	arco	-0.0888925	-0.847342	-0.669557	-0.0134388	-0.56734	-0.509248	-0.469793	0.312518	0.450186	0.643977	0.716969	-1
CYP46A1	deaf	nido	hvc	0.691232	0.52509	0.52509	-0.0580465	-0.701292	-0.659657	-0.595045	0.396745	0.454193	0.521028	0.616787	1
CYP46A1	deaf	x	hvc	-0.363887	-1.28373	-0.555957	0.0330229	-0.497631	-0.437783	-0.372518	0.426581	0.485116	0.522141	0.574704	-1
CYP46A1	deaf	nido	ncl	0.840424	0.852982	0.827865	-0.0103865	-0.636094	-0.591735	-0.552657	0.340318	0.444305	0.511741	0.604032	1
CYP46A1	deaf	ra	lman	-0.00356261	-0.513805	-0.506679	0.0478779	-0.478949	-0.454227	-0.43223	0.424696	0.512737	0.556141	0.613	-1
CYP46A1	deaf	hvc	nido	0.691232	0.52509	0.52509	-0.0580465	-0.701292	-0.659657	-0.595045	0.396745	0.454193	0.521028	0.616787	1
CYP46A1	deaf	ncl	nido	0.840424	0.852982	0.827865	-0.0103865	-0.636094	-0.591735	-0.552657	0.340318	0.444305	0.511741	0.604032	1
CYP46A1	deaf	hvc	x	-0.363887	-1.28373	-0.555957	0.0330229	-0.497631	-0.437783	-0.372518	0.426581	0.485116	0.522141	0.574704	-1
CYP7B1	deaf	nido	ra	0.619867	0.54281	0.54281	-0.020062	-0.56131	-0.504882	-0.431042	0.327658	0.401408	0.467886	0.476425	1
CYP7B1	deaf	stri	ra	0.721138	0.663816	0.663816	0.0217958	-0.511934	-0.473382	-0.429489	0.429399	0.495337	0.574209	0.673946	1
CYP7B1	deaf	stri	hvc	0.752233	0.819111	0.685354	0.00168681	-0.63752	-0.574491	-0.429961	0.419431	0.533495	0.581798	0.608301	1
CYP7B1	deaf	x	lman	-0.0275175	-0.611431	-0.556396	0.00779761	-0.586067	-0.540563	-0.478295	0.371834	0.444405	0.480696	0.55326	-1
CYP7B1	deaf	ra	nido	0.619867	0.54281	0.54281	-0.020062	-0.56131	-0.504882	-0.431042	0.327658	0.401408	0.467886	0.476425	1
CYP7B1	deaf	stri	nido	0.639247	0.66057	0.617923	-0.0803485	-0.676061	-0.599671	-0.526768	0.239362	0.404541	0.455034	0.512157	1
CYP7B1	deaf	lman	x	-0.0275175	-0.611431	-0.556396	0.00779761	-0.586067	-0.540563	-0.478295	0.371834	0.444405	0.480696	0.55326	-1
CYP7B1	deaf	ra	stri	0.721138	0.663816	0.663816	0.0217958	-0.511934	-0.473382	-0.429489	0.429399	0.495337	0.574209	0.673946	1
CYP7B1	deaf	hvc	stri	0.752233	0.819111	0.685354	0.00168681	-0.63752	-0.574491	-0.429961	0.419431	0.533495	0.581798	0.608301	1
CYP7B1	deaf	nido	stri	0.639247	0.66057	0.617923	-0.0803485	-0.676061	-0.599671	-0.526768	0.239362	0.404541	0.455034	0.512157	1
CYTH1	deaf	nido	ra	0.609352	0.569246	0.569246	-0.0144051	-0.565482	-0.514265	-0.463635	0.328858	0.452819	0.460717	0.464855	1
CYTH1	deaf	lman	arco	0.625834	0.641717	0.609951	-0.0329309	-0.549916	-0.53267	-0.470562	0.296252	0.430838	0.469021	0.479475	1
CYTH1	deaf	x	ncl	-0.132373	-0.739153	-0.474407	-0.0880395	-0.51626	-0.457198	-0.437791	0.310789	0.369876	0.393451	0.419264	-1
CYTH1	deaf	arco	lman	0.625834	0.641717	0.609951	-0.0329309	-0.549916	-0.53267	-0.470562	0.296252	0.430838	0.469021	0.479475	1
CYTH1	deaf	nido	lman	0.0675974	-0.623554	-0.623554	-0.00690931	-0.541259	-0.514778	-0.467957	0.382174	0.527748	0.608848	0.639672	-1
CYTH1	deaf	ra	nido	0.609352	0.569246	0.569246	-0.0144051	-0.565482	-0.514265	-0.463635	0.328858	0.452819	0.460717	0.464855	1
CYTH1	deaf	lman	nido	0.0675974	-0.623554	-0.623554	-0.00690931	-0.541259	-0.514778	-0.467957	0.382174	0.527748	0.608848	0.639672	-1
CYTH1	deaf	ncl	x	-0.132373	-0.739153	-0.474407	-0.0880395	-0.51626	-0.457198	-0.437791	0.310789	0.369876	0.393451	0.419264	-1
D2HGDH	deaf	hvc	ra	0.602776	0.526698	0.526698	-0.0308336	-0.613167	-0.530994	-0.471221	0.278901	0.374699	0.520985	0.604484	1
D2HGDH	deaf	nido	ra	0.643156	0.629274	0.629274	-0.0596193	-0.640841	-0.588785	-0.552834	0.298835	0.371616	0.444612	0.528087	1
D2HGDH	deaf	ncl	arco	-0.578761	-0.704743	0.452778	-0.00838403	-0.561248	-0.536494	-0.420456	0.307391	0.402889	0.43965	0.465515	1
D2HGDH	deaf	ra	hvc	0.602776	0.526698	0.526698	-0.0308336	-0.613167	-0.530994	-0.471221	0.278901	0.374699	0.520985	0.604484	1
D2HGDH	deaf	arco	ncl	-0.578761	-0.704743	0.452778	-0.00838403	-0.561248	-0.536494	-0.420456	0.307391	0.402889	0.43965	0.465515	1
D2HGDH	deaf	nido	lman	-0.026755	-0.631253	-0.577743	-0.0421167	-0.552031	-0.527745	-0.464801	0.257342	0.307837	0.380599	0.444628	-1
D2HGDH	deaf	ra	nido	0.643156	0.629274	0.629274	-0.0596193	-0.640841	-0.588785	-0.552834	0.298835	0.371616	0.444612	0.528087	1
D2HGDH	deaf	lman	nido	-0.026755	-0.631253	-0.577743	-0.0421167	-0.552031	-0.527745	-0.464801	0.257342	0.307837	0.380599	0.444628	-1
DAB2	deaf	ncl	ra	0.607152	0.667713	0.546591	-0.0144273	-0.53887	-0.503428	-0.48477	0.361537	0.430492	0.491876	0.614142	1
DAB2	deaf	ra	ncl	0.607152	0.667713	0.546591	-0.0144273	-0.53887	-0.503428	-0.48477	0.361537	0.430492	0.491876	0.614142	1
DAB2	deaf	lman	ncl	0.674999	0.829323	0.520674	-0.0449125	-0.644441	-0.571582	-0.455339	0.334034	0.404142	0.483902	0.513735	1
DAB2	deaf	ncl	lman	0.674999	0.829323	0.520674	-0.0449125	-0.644441	-0.571582	-0.455339	0.334034	0.404142	0.483902	0.513735	1
DAB2	deaf	nido	lman	0.227137	-0.549398	-0.549398	0.00976269	-0.512108	-0.447026	-0.417616	0.360309	0.419643	0.505136	0.549871	-1
DAB2	deaf	lman	nido	0.227137	-0.549398	-0.549398	0.00976269	-0.512108	-0.447026	-0.417616	0.360309	0.419643	0.505136	0.549871	-1
DAB2	deaf	stri	nido	0.12984	-0.579783	-0.579783	-0.0175251	-0.667539	-0.542143	-0.441139	0.306197	0.349762	0.437419	0.466576	-1
DAB2	deaf	nido	stri	0.12984	-0.579783	-0.579783	-0.0175251	-0.667539	-0.542143	-0.441139	0.306197	0.349762	0.437419	0.466576	-1
DACH1	deaf	stri	hvc	-0.0182233	-0.571654	-0.535208	0.0496333	-0.486716	-0.434582	-0.388865	0.343207	0.534451	0.588914	0.648666	-1
DACH1	deaf	stri	lman	0.0306045	-0.523797	-0.523797	0.0111259	-0.524602	-0.502446	-0.439949	0.33325	0.512567	0.595768	0.694023	-1
DACH1	deaf	hvc	stri	-0.0182233	-0.571654	-0.535208	0.0496333	-0.486716	-0.434582	-0.388865	0.343207	0.534451	0.588914	0.648666	-1
DACH1	deaf	lman	stri	0.0306045	-0.523797	-0.523797	0.0111259	-0.524602	-0.502446	-0.439949	0.33325	0.512567	0.595768	0.694023	-1
DACH2	deaf	hvc	ra	0.703187	0.717068	0.689307	0.0330886	-0.508217	-0.457541	-0.416006	0.39779	0.5175	0.61821	0.656783	1
DACH2	deaf	lman	arco	0.718514	0.825321	0.611707	-0.070404	-0.661805	-0.576864	-0.543892	0.299009	0.488394	0.548571	0.608919	1
DACH2	deaf	x	arco	0.76556	0.912138	0.618982	-0.00375633	-0.691106	-0.494601	-0.365492	0.282848	0.446936	0.517895	0.56002	1
DACH2	deaf	ra	hvc	0.703187	0.717068	0.689307	0.0330886	-0.508217	-0.457541	-0.416006	0.39779	0.5175	0.61821	0.656783	1
DACH2	deaf	arco	lman	0.718514	0.825321	0.611707	-0.070404	-0.661805	-0.576864	-0.543892	0.299009	0.488394	0.548571	0.608919	1
DACH2	deaf	arco	x	0.76556	0.912138	0.618982	-0.00375633	-0.691106	-0.494601	-0.365492	0.282848	0.446936	0.517895	0.56002	1
DACT2	deaf	stri	ra	0.0230695	0.645493	-0.599354	-0.0127162	-0.605441	-0.494513	-0.449614	0.285464	0.410067	0.435345	0.487221	-1
DACT2	deaf	nido	arco	-0.711153	-0.759971	0.662336	-0.0204923	-0.605369	-0.568699	-0.546673	0.27288	0.473071	0.591021	0.768834	1
DACT2	deaf	lman	ncl	0.664653	0.708801	0.620506	-0.0298022	-0.559197	-0.504787	-0.463672	0.382248	0.475358	0.542196	0.601161	1
DACT2	deaf	ncl	lman	0.664653	0.708801	0.620506	-0.0298022	-0.559197	-0.504787	-0.463672	0.382248	0.475358	0.542196	0.601161	1
DACT2	deaf	x	lman	-0.0632729	-0.640943	-0.514397	0.085999	-0.441595	-0.373399	-0.326506	0.422234	0.559248	0.590397	0.659515	-1
DACT2	deaf	arco	nido	-0.711153	-0.759971	0.662336	-0.0204923	-0.605369	-0.568699	-0.546673	0.27288	0.473071	0.591021	0.768834	1
DACT2	deaf	stri	nido	0.066891	-0.605447	-0.605447	-0.0424169	-0.629649	-0.598544	-0.47961	0.340498	0.472123	0.521164	0.556288	-1
DACT2	deaf	lman	x	-0.0632729	-0.640943	-0.514397	0.085999	-0.441595	-0.373399	-0.326506	0.422234	0.559248	0.590397	0.659515	-1
DACT2	deaf	ra	stri	0.0230695	0.645493	-0.599354	-0.0127162	-0.605441	-0.494513	-0.449614	0.285464	0.410067	0.435345	0.487221	-1
DACT2	deaf	nido	stri	0.066891	-0.605447	-0.605447	-0.0424169	-0.629649	-0.598544	-0.47961	0.340498	0.472123	0.521164	0.556288	-1
DALRD3	deaf	ncl	arco	0.00607187	-0.696319	-0.696319	-0.0279082	-0.663235	-0.636501	-0.470646	0.267391	0.371306	0.409958	0.482555	-1
DALRD3	deaf	stri	arco	-0.0033056	-0.661807	-0.655196	0.000607167	-0.745033	-0.642721	-0.545626	0.394699	0.510811	0.628204	0.66971	-1
DALRD3	deaf	arco	ncl	0.00607187	-0.696319	-0.696319	-0.0279082	-0.663235	-0.636501	-0.470646	0.267391	0.371306	0.409958	0.482555	-1
DALRD3	deaf	nido	ncl	-0.960482	-0.694585	0.694585	-0.0578082	-0.617371	-0.547554	-0.536588	0.355559	0.501521	0.619057	0.680574	1
DALRD3	deaf	ncl	nido	-0.960482	-0.694585	0.694585	-0.0578082	-0.617371	-0.547554	-0.536588	0.355559	0.501521	0.619057	0.680574	1
DALRD3	deaf	arco	stri	-0.0033056	-0.661807	-0.655196	0.000607167	-0.745033	-0.642721	-0.545626	0.394699	0.510811	0.628204	0.66971	-1
DAPK1	deaf	x	ra	0.232069	-0.74966	-0.74966	-0.0666039	-0.735879	-0.706105	-0.64156	0.245061	0.364078	0.388962	0.498939	-1
DAPK1	deaf	lman	ncl	0.0688302	-0.62193	-0.62193	-0.00554331	-0.446791	-0.430627	-0.407608	0.424085	0.497213	0.554132	0.582575	-1
DAPK1	deaf	stri	ncl	0.158765	-0.544647	-0.544647	0.0387932	-0.495911	-0.484049	-0.46497	0.458406	0.543098	0.627382	0.664338	-1
DAPK1	deaf	ncl	lman	0.0688302	-0.62193	-0.62193	-0.00554331	-0.446791	-0.430627	-0.407608	0.424085	0.497213	0.554132	0.582575	-1
DAPK1	deaf	ra	x	0.232069	-0.74966	-0.74966	-0.0666039	-0.735879	-0.706105	-0.64156	0.245061	0.364078	0.388962	0.498939	-1
DAPK1	deaf	ncl	stri	0.158765	-0.544647	-0.544647	0.0387932	-0.495911	-0.484049	-0.46497	0.458406	0.543098	0.627382	0.664338	-1
DAPK3	deaf	hvc	arco	0.228626	-0.517864	-0.517864	0.0172587	-0.503814	-0.48638	-0.357182	0.357285	0.497024	0.589825	0.615339	-1
DAPK3	deaf	stri	arco	0.126402	-0.598156	-0.598156	0.0556787	-0.512656	-0.439578	-0.391657	0.388993	0.430107	0.613137	0.725116	-1
DAPK3	deaf	arco	hvc	0.228626	-0.517864	-0.517864	0.0172587	-0.503814	-0.48638	-0.357182	0.357285	0.497024	0.589825	0.615339	-1
DAPK3	deaf	lman	hvc	0.0349421	-0.433779	-0.433779	-7.4178e-05	-0.529785	-0.418491	-0.356665	0.374485	0.413587	0.467129	0.64697	-1
DAPK3	deaf	hvc	lman	0.0349421	-0.433779	-0.433779	-7.4178e-05	-0.529785	-0.418491	-0.356665	0.374485	0.413587	0.467129	0.64697	-1
DAPK3	deaf	stri	lman	0.245218	-0.573297	-0.573297	-0.0426396	-0.671428	-0.556582	-0.483904	0.406974	0.48401	0.598582	0.641664	-1
DAPK3	deaf	arco	stri	0.126402	-0.598156	-0.598156	0.0556787	-0.512656	-0.439578	-0.391657	0.388993	0.430107	0.613137	0.725116	-1
DAPK3	deaf	lman	stri	0.245218	-0.573297	-0.573297	-0.0426396	-0.671428	-0.556582	-0.483904	0.406974	0.48401	0.598582	0.641664	-1
DBT	deaf	stri	nido	-0.117314	-0.798424	-0.563795	-0.0655231	-0.639413	-0.557196	-0.489501	0.296832	0.366296	0.502757	0.537167	-1
DBT	deaf	nido	stri	-0.117314	-0.798424	-0.563795	-0.0655231	-0.639413	-0.557196	-0.489501	0.296832	0.366296	0.502757	0.537167	-1
DCAF1	deaf	hvc	ra	-0.00690212	-0.852679	-0.838875	0.0264456	-0.589177	-0.544976	-0.422347	0.436854	0.562366	0.698554	0.725297	-1
DCAF1	deaf	stri	ra	0.615899	0.505399	0.505399	0.0227973	-0.798506	-0.579444	-0.439966	0.374692	0.464716	0.487339	0.526233	1
DCAF1	deaf	ra	hvc	-0.00690212	-0.852679	-0.838875	0.0264456	-0.589177	-0.544976	-0.422347	0.436854	0.562366	0.698554	0.725297	-1
DCAF1	deaf	ra	stri	0.615899	0.505399	0.505399	0.0227973	-0.798506	-0.579444	-0.439966	0.374692	0.464716	0.487339	0.526233	1
DCP2	deaf	nido	hvc	0.0136068	-0.615269	-0.615269	-0.0262444	-0.526693	-0.49119	-0.456102	0.272434	0.369331	0.473772	0.611371	-1
DCP2	deaf	x	lman	0.907351	0.597943	0.597943	0.0600857	-0.48998	-0.43062	-0.396853	0.387523	0.438443	0.528497	0.564504	1
DCP2	deaf	hvc	nido	0.0136068	-0.615269	-0.615269	-0.0262444	-0.526693	-0.49119	-0.456102	0.272434	0.369331	0.473772	0.611371	-1
DCP2	deaf	lman	x	0.907351	0.597943	0.597943	0.0600857	-0.48998	-0.43062	-0.396853	0.387523	0.438443	0.528497	0.564504	1
DCTD	deaf	x	lman	0.137958	-0.65832	-0.65832	0.0875757	-0.675031	-0.593899	-0.49265	0.436593	0.507844	0.522974	0.561645	-1
DCTD	deaf	lman	x	0.137958	-0.65832	-0.65832	0.0875757	-0.675031	-0.593899	-0.49265	0.436593	0.507844	0.522974	0.561645	-1
DDX54	deaf	lman	ncl	0.571487	0.578399	0.564574	0.00068793	-0.615605	-0.559793	-0.507331	0.435735	0.518014	0.554564	0.590401	1
DDX54	deaf	ncl	lman	0.571487	0.578399	0.564574	0.00068793	-0.615605	-0.559793	-0.507331	0.435735	0.518014	0.554564	0.590401	1
DDX54	deaf	stri	nido	-0.106967	0.517094	-0.517094	0.0200126	-0.655823	-0.511028	-0.445315	0.361583	0.507432	0.572471	0.576625	-1
DDX54	deaf	nido	stri	-0.106967	0.517094	-0.517094	0.0200126	-0.655823	-0.511028	-0.445315	0.361583	0.507432	0.572471	0.576625	-1
DEF8	deaf	x	ncl	0.730063	0.72588	0.72588	-0.0103189	-0.67789	-0.656382	-0.550588	0.366773	0.530805	0.581508	0.694832	1
DEF8	deaf	ncl	x	0.730063	0.72588	0.72588	-0.0103189	-0.67789	-0.656382	-0.550588	0.366773	0.530805	0.581508	0.694832	1
DFNA5	deaf	stri	arco	-0.130384	-0.858514	-0.597747	0.0493597	-0.608284	-0.563626	-0.386403	0.363741	0.423245	0.594823	0.683081	-1
DFNA5	deaf	nido	ncl	-0.596267	-0.5895	0.5895	0.00972988	-0.543774	-0.507391	-0.44277	0.37051	0.474244	0.526596	0.623538	1
DFNA5	deaf	ncl	nido	-0.596267	-0.5895	0.5895	0.00972988	-0.543774	-0.507391	-0.44277	0.37051	0.474244	0.526596	0.623538	1
DFNA5	deaf	arco	stri	-0.130384	-0.858514	-0.597747	0.0493597	-0.608284	-0.563626	-0.386403	0.363741	0.423245	0.594823	0.683081	-1
DHRSX	deaf	ncl	ra	0.861225	0.810527	0.810527	-0.00241128	-0.71717	-0.547869	-0.497	0.396273	0.483793	0.590664	0.730189	1
[truncated: 5,059 more rows]
